# Supplementary material
Source: PubMed Central journal article supplement (PMC3922203)
Supplement: NIHMS406506-supplement-1.pdf [file NIHMS406506-supplement-1.pdf]

**SUPPLEMENTARY MATERIAL** to Uhl *et al* “Smoking quit success genotype score predicts quit success and distinct patterns of developmental involvement with common addictive substances”

**Figure S1: Design of the smoking cessation trial. Each of the 50 European-American smokers who achieved continuous abstinence for 11 weeks were matched to 117 smokers who failed to achieve abstinence for genotyping (from total n = 420).**

**Matching was based on race, gender and arm of the study. Participants were enrolled with consent for genotyping, treated with 21 or 42 mg NRT patches, and stratified for subsequent treatment based on reductions in CO levels in end expired air at the end of the first of two weeks of precessation treatment during which participants were instructed that they could smoke freely until the targeted quit date (two weeks after onset of NRT). Numbers of participants who were genotyped came from the 21 mg NRT, 42 mg NRT, 21 mg NRT + bupropion, 42 mg NRT + bupropion, 21 mg NRT then varenicline and 42 mg NRT then varenicline arms as follows: 37, 49, 21, 24, 19 and 19 (note that the first two values come from individuals falling into both groups A1 and A2, below). Mean v1.0 scores were 381, 388, 383, 370, 391 and 390, respectively, displaying no significant differences.**

**Ranges of v1.0 scores from participants who received NRT, bupropion + NRT and NRT then varenicline treatment were 291-470, 312-456 and 307-450, respectively. NRT doses were gradually reduced beginning 4 or 6 weeks after the quit date for the 42 and 21 mg/24 h groups, respectively.**

**Participants with sleep disturbances removed patches at bedtime and applied new ones upon awakening. Subjects experiencing other symptoms of nicotine toxicity reduced doses until symptoms abated according to the following sequence: reduce morning patch from 21- to 14- to 7 to 0 mg/day, then discontinue the afternoon patch.**

Partial results for cessation success enhancement from this adaptive treatment have been reported by Rose and colleagues (Abstracts, Society for Research on Nicotine and Tobacco, 2011).

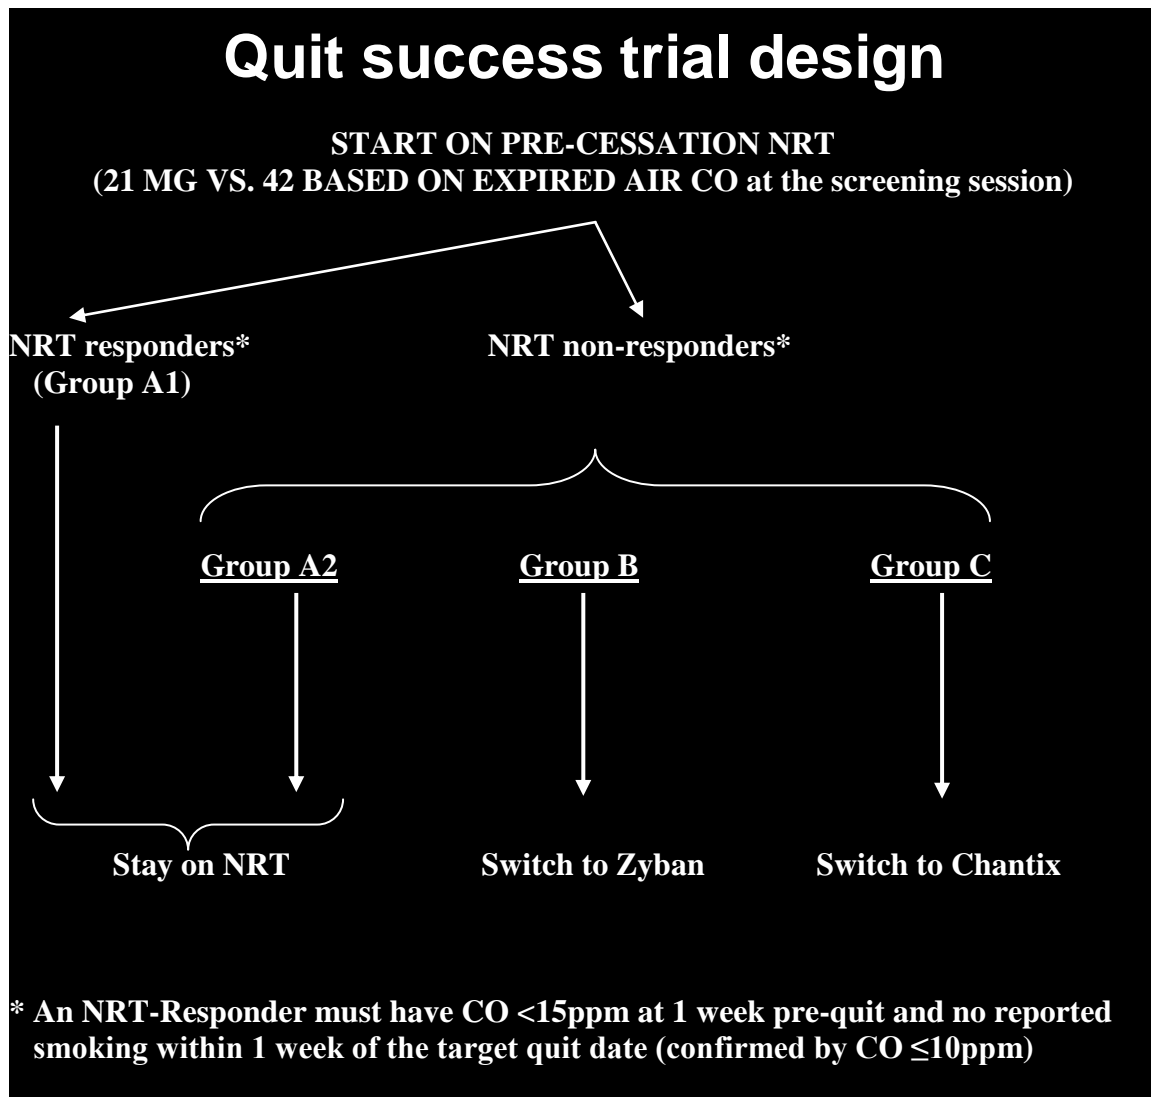

**Figure S2: Design of prevention intervention trial (cohort III) and followup.** Seven hundred ninety nine Baltimore first graders in 1993 (cohort III; 6.2 +/-0.4 years old when entering) were recruited from 27 classrooms in 9 Baltimore elementary schools<sup>1,2 3,4</sup>. 63% qualified for free or reduced price lunch. Participants were group-randomized to control or one of two universal, elementary school-based interventions [25, 26] that targeted improved behavior and school performance as well as subsequent reductions in drug use, antisocial behavior and school failure [27, 28]. Fifty four percent were male, 85% African American and 13% European American.

Participants provided data at a median of nine of ten follow-up attempts that asked questions about drug use from 8<sup>th</sup> grade until age 24. There was about 20% loss of subjects to follow-up over this time period, but there was not any significant difference in the dropout in different arms of the trial. During follow-up visits in 2007 – 2011, about 80% of participants provided consent for genotyping and blood and/or buccal material for DNA extraction. We present data from these 555 individuals with both clinical information and genotype scores.

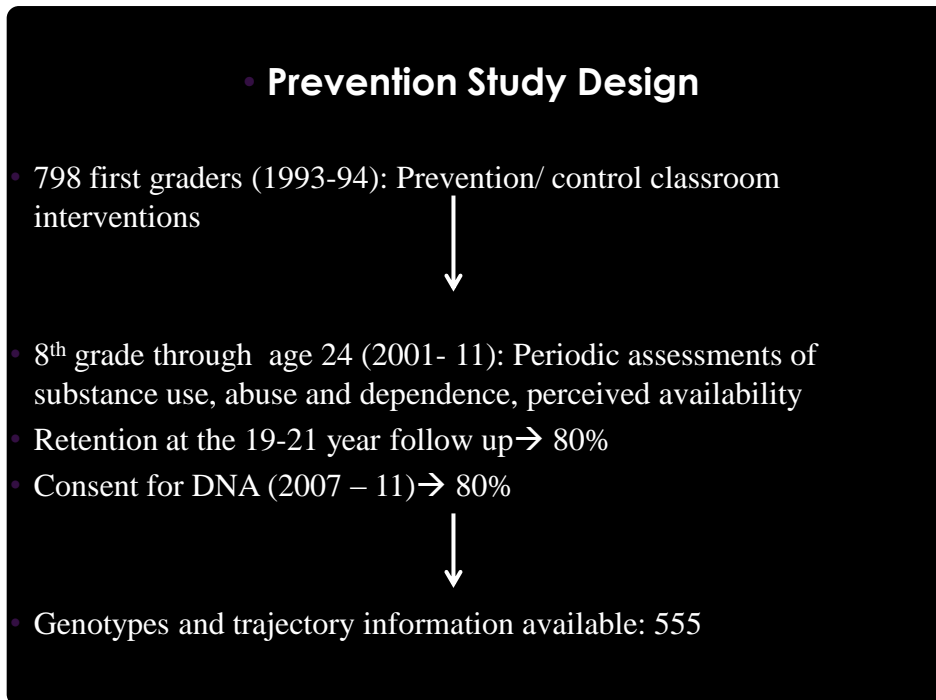

**FIGURE S3: Probabilities (Y axis) of membership in the two classes most strongly associated with v1.0 scores in individuals in prevention study cohort III (individuals 1 – 555 arrayed on X axis).**

**A. Class 1. Note that only 3% of participants displayed probabilities between 0.2 and 0.8 of membership in this class.**

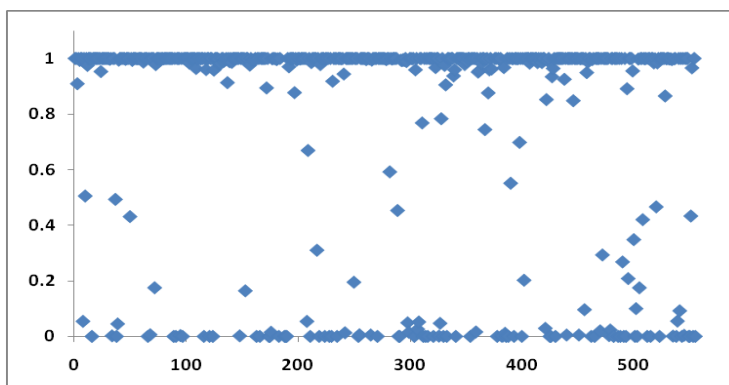

**B. Class 3. Note that only 4.9% of participants displayed probabilities between 0.2 and 0.8 of membership in this class.**

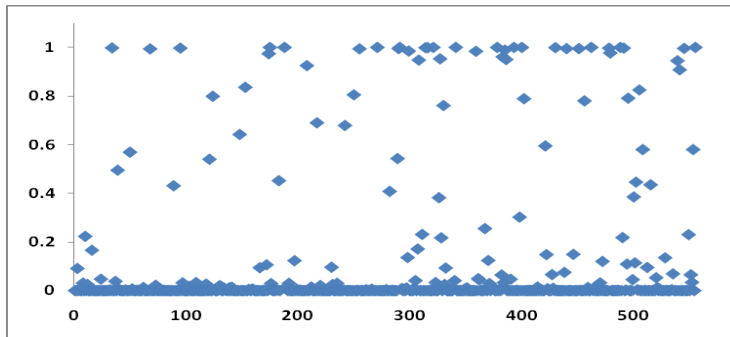

**Supplementary analyses:**

**A. There was low correlation between v1.0 scores and a measure of smoking, the heaviness of smoking index assessed at baseline for smoking cessation clinical trial participants (-0.114; Pearson correlation coefficient).**

**B. There was a low correlation between v1.0 scores and another measure that can predict quit success, reduction in exhaled CO during the first week of precessation NRT for smoking cessation clinical trial participants (0.072 Pearson correlation coefficient between z transformed CO reduction and F1 scores).**

**C. The area under receiver operating characteristic curve for CO reduction during the first week of precessation NRT in predicting 11 week continuous abstinence was 0.675, similar to the predictive ability of the genotypic v1.0 scores (0.657), even though there was little correlation between these two predictors of quit success.**

**D. Power for quitter vs nonquitter (n = 50 vs 117 as used in the present report) with differences of 0.1, 0.05, 0.025 and 0.01 using observed mean standard deviation (0.07) from prior studies of smoking cessation success would be 1, 0.99, 0.55 and 0.13, respectively.**

**E. There were no significant relationships between v1.0 scores and treatment arm (ANOVA  $F = 2.27$ ,  $p = .1$ , power = 0.4), patch dose (ANOVA  $F = .007$ ,  $p = 0.93$ , power**



= 0.05), or whether a participant achieved >50% CO reduction during precessation NRT (ANOVA  $F = 1.25$ ,  $p = 0.27$ , power = .19). The v1.0 score predicted abstinence using logistic regression with and without treatment in the model with similar p values (.029 and 0.03, respectively).

**F. End-expired air CO measurements from trial participants during screening correlates with screening values on the Fagerstrom Test for Nicotine Dependence (ANOVA  $F = 12.1$ ,  $p = 0.006$ ) and Heaviness of Smoking index screening values (ANOVA  $F = 32.5$ ,  $p < 0.001$ ).**

**G. While there was significant overlap at the level of some genes (eg CDH13, see main article), there was only chance overlap of SNPs from the v1.0 score and those identified by tests of several phenotypes in smoker samples using different genotyping platforms<sup>5-7</sup>.**

**H. ROC curves for an unweighted score comprised of the sum of risk alleles provided results that were slightly less significant than those for the v1.0 score in which risk alleles were differentially weighted (AUC = 0.65).**

**I. In secondary analyses of the association of v1.0 scores with developmental trajectories of substance use, the v1.0 score provided a highly-significant covariate when it was added to two additional analyses: i) a latent class growth LCGA model, or ii) a longitudinal latent class analyses, using M plus.**



## TABLES S1 – S4

**Table S1:** Characteristics of latent class growth analyses for developmental profiles of use of common addictive substances from ages 14 – 23. Columns list: the number of classes, log likelihood of model fit to data, number of free parameters for each model, Bayesian information content for each model, VLMR ratio test, entropy and frequency of the smallest class in the model. Note that the BLRT was 0 for all models. Based on these data and the desire to model as many classes as sensible, we chose to use a three class model.

| Number classes | Log likelihood | # free param | BIC   | VLMRLRT | Entropy | Smallest class freq |
|----------------|----------------|--------------|-------|---------|---------|---------------------|
| 1              | -17323         | 12           | 34726 | n/a     | n/a     | n/a                 |
| 2              | -16656         | 15           | 33412 | 0.003   | 0.918   | 0.15                |
| 3              | -16519         | 18           | 33158 | 0.175   | 0.915   | 0.07                |
| 4              | -16382         | 21           | 32904 | 0.009   | 0.894   | 0.04                |
| 5              | -16309         | 24           | 32779 | 0.021   | 0.839   | 0.04                |

**Table S2:** Validation of the prevention study samples. Genomic regions and genes identified by prevention samples overlap with those identified by previously-reported NIDA-MNB research volunteer samples, based on clustered, nominally-significant SNPs. Monte Carlo simulations support  $p < 10^{-5}$  for overall overlap of these dependence *vs* control datasets from these prevention samples and larger, research volunteer samples. These data compare African Americans from prevention and research volunteer samples and display this remarkable overlap of results despite modest differences in the ages (mid 20s *vs* mid 30s, respectively), gender distribution (more males in the research volunteer group) and dependence (dependence on any addictive substance *vs* heavy use of and dependence on at least one illegal substance, respectively).

***Prevention study samples and interventions:*** Baltimore first graders in 1985, 1986 and 1993 (cohorts I - III, respectively) were group-randomized to control or preventive interventions intended to improve behavior and school performance that were applied through grades 1 (cohort III) or 1 and 2 (cohorts I and II), as noted above. Participants provided data at a median of six of the eight (Cohorts I and II) and nine of ten (Cohort III) follow-up attempts, including extensive data about substance use, abuse and dependence. Opportunities to use addictive substances of specific classes were assessed contemporaneously at each assessment (cohort III) or retrospectively, seeking lifetime data on opportunities to use, through questions asked at age *ca.* 18 – 19 (cohorts I and II). DSM diagnoses of substance dependence came from the Diagnostic Interview Schedule (DIS) <sup>8</sup>. Nicotine dependence was diagnosed using the Fagerstrom Test for Nicotine Dependence (FTND), with a cut off of  $\geq 6$  <sup>9-11</sup>. There was *ca* 20% loss of subjects to follow-up over this time period.

Substance dependence was diagnosed using DSM and/or FTND criteria in 81 of these African-American study participants. These individuals were matched for gender, age and ethnicity to the 175 African-American controls who reported the most opportunities to use addictive substances but displayed neither dependence, abuse or extensive use of any addictive substance. For each control individual in cohort III, we summed the times that the subject responded “yes” to questions about opportunities to use substances of each class during their follow-up assessments. For each individual in cohorts I and II, we summed the times that the subject responded “yes” to questions about retrospective opportunities to use substances in each class during the age 18/19 assessment.

***Comparison research volunteer sample for assessments of substance dependence:***

Results from these prevention study subjects were compared to data from ethnically-matched MNB research volunteers who provided informed consents, ethnicity data, drug

use histories and DSMIII-R or IV diagnoses, or control histories. DNA from 35 and 12 pools sampled 700 “abusers” with DSMIII-R/IV dependence on at least one illegal abused substance and 240 “controls” who reported no significant lifetime use of any addictive substance, respectively.

**Analyses:** SNPs that displayed  $\chi^2$  statistics with  $p < 0.05$  for differences between prevention study substance dependent vs control individuals often clustered so that at least four of these nominally-significant SNPs lay within 10 kb of each other (average distances between nominally-significant SNP was about 3 kb). We focus our preplanned analyses on the chromosomal regions and genes identified by these clusters of nominally-significant SNPs in these samples that overlap with those identified, using the same criteria, in 1M SNP studies of DNA pools from NIDA MNB African American research volunteers<sup>12</sup>. We compared the chromosomal regions that were identified by clustered, nominally-positive SNPs from both samples to those identified by chance in random Monte Carlo trials. Each Monte Carlo trial began with random sets of SNPs of the same sizes as those identified by the true data in each sample. For each trial, the random set of SNPs was assessed to see if it provided results equal to or greater than the results that we actually observed. The number of trials for which the randomly-selected SNPs displayed (at least) the same features displayed by the observed results was then tallied to generate an empirical p value for each region. These simulations, not corrected for multiple comparisons, test the null hypothesis that the results from the prevention and research volunteer samples identify the same chromosomal regions at the rates expected by chance.

#  $p < 5 \times 10^{-2}$   
SNPs

|           |                 |                 |                   |            |                |                     |
|-----------|-----------------|-----------------|-------------------|------------|----------------|---------------------|
| <i>ch</i> | <i>bp:start</i> | <i>bp: stop</i> | <i>Prevention</i> | <i>MNB</i> | <i>gene(s)</i> | <i>p<br/>region</i> |
|-----------|-----------------|-----------------|-------------------|------------|----------------|---------------------|

|   |           |           |    |    |              |        |
|---|-----------|-----------|----|----|--------------|--------|
| 1 | 160191373 | 160202745 | 5  | 4  | ATF6         | 0.0177 |
| 1 | 161203260 | 161213817 | 6  | 5  |              | 0.0119 |
| 1 | 175138260 | 175154142 | 4  | 4  | ASTN1        | 0.0248 |
| 1 | 175396660 | 175414782 | 6  | 5  | ASTN1, FAM5B | 0.0117 |
| 1 | 180378729 | 180451983 | 17 | 4  |              | 0.0025 |
| 1 | 202827613 | 202856667 | 10 | 5  | LRRN2        | 0.0062 |
| 1 | 202942264 | 202979528 | 4  | 8  |              | 0.0274 |
| 1 | 232160317 | 232175256 | 6  | 4  | SLC35F3      | 0.0142 |
| 1 | 239112219 | 239119745 | 7  | 6  | RGS7         | 0.0072 |
| 2 | 18512168  | 18552016  | 5  | 11 |              | 0.0072 |
| 2 | 19809895  | 19832145  | 9  | 4  |              | 0.0095 |
| 2 | 23512565  | 23535429  | 4  | 6  | KLHL29       | 0.0243 |
| 2 | 40203135  | 40231274  | 4  | 9  | SLC8A1       | 0.0227 |
| 2 | 41927142  | 41958171  | 4  | 9  |              | 0.0240 |
| 2 | 52116162  | 52119167  | 5  | 4  |              | 0.0169 |
| 2 | 59959186  | 59981948  | 4  | 4  |              | 0.0282 |
| 2 | 60009197  | 60034167  | 4  | 4  |              | 0.0282 |
| 2 | 60056121  | 60074321  | 5  | 5  |              | 0.0142 |
| 2 | 65611155  | 65637534  | 4  | 4  |              | 0.0282 |
| 2 | 102465003 | 102470720 | 7  | 6  | SLC9A4       | 0.0072 |
| 2 | 102531561 | 102549119 | 4  | 6  |              | 0.0227 |
| 2 | 153589361 | 153606718 | 5  | 4  |              | 0.0183 |
| 2 | 180157402 | 180173092 | 7  | 6  | ZNF385B      | 0.0084 |
| 2 | 205024284 | 205030863 | 5  | 4  |              | 0.0169 |
| 2 | 205043875 | 205056347 | 4  | 5  |              | 0.0223 |
| 2 | 205764143 | 205772717 | 4  | 4  | PARD3B       | 0.0229 |
| 2 | 213230739 | 213253635 | 4  | 7  |              | 0.0236 |
| 3 | 342757    | 362699    | 5  | 4  | CHL1         | 0.0183 |
| 3 | 3314720   | 3330967   | 10 | 9  |              | 0.0034 |
| 3 | 4703008   | 4726802   | 4  | 6  | ITPR1        | 0.0243 |
| 3 | 8311105   | 8341118   | 7  | 6  |              | 0.0098 |
| 3 | 25352331  | 25371869  | 6  | 4  |              | 0.0144 |
| 3 | 45346691  | 45365948  | 5  | 4  |              | 0.0183 |
| 3 | 59953952  | 60014051  | 4  | 21 | FHIT         | 0.0050 |
| 3 | 125407985 | 125429920 | 5  | 7  | KALRN        | 0.0100 |
| 3 | 133258006 | 133274794 | 4  | 4  |              | 0.0248 |
| 3 | 141263730 | 141276065 | 5  | 7  | CLSTN2       | 0.0086 |
| 3 | 144384755 | 144408513 | 7  | 11 | PBX2P1       | 0.0040 |
| 3 | 147137838 | 147147943 | 4  | 4  |              | 0.0248 |
| 3 | 188867480 | 188880377 | 6  | 5  | SST          | 0.0119 |
| 4 | 62981022  | 63014022  | 11 | 8  |              | 0.0039 |
| 4 | 96335801  | 96348982  | 7  | 6  | UNC5C        | 0.0082 |
| 4 | 183366064 | 183388602 | 5  | 5  |              | 0.0151 |
| 5 | 3125862   | 3150123   | 6  | 6  |              | 0.0142 |
| 5 | 7591237   | 7618466   | 8  | 7  | ADCY2        | 0.0064 |
| 5 | 31125851  | 31142561  | 7  | 4  |              | 0.0126 |
| 5 | 62256957  | 62281661  | 6  | 4  |              | 0.0158 |
| 5 | 65207338  | 65234468  | 12 | 6  |              | 0.0038 |
| 5 | 91916876  | 91937276  | 5  | 6  |              | 0.0121 |
| 5 | 92251888  | 92266636  | 4  | 4  |              | 0.0248 |
| 5 | 122557150 | 122592530 | 5  | 7  |              | 0.0116 |
| 5 | 123654964 | 123666386 | 4  | 4  |              | 0.0248 |
| 5 | 141840281 | 141860047 | 4  | 5  |              | 0.0236 |
| 5 | 146670562 | 146709155 | 8  | 5  | STK32A       | 0.0100 |

|    |           |           |    |    |          |        |
|----|-----------|-----------|----|----|----------|--------|
| 5  | 146736071 | 146771949 | 5  | 6  | DPYSL3   | 0.0140 |
| 5  | 157948815 | 157985228 | 7  | 4  |          | 0.0130 |
| 5  | 160128669 | 160151601 | 11 | 6  | ATP10B   | 0.0049 |
| 6  | 687311    | 700033    | 4  | 4  |          | 0.0248 |
| 6  | 804115    | 831884    | 4  | 6  |          | 0.0245 |
| 6  | 2734370   | 2755888   | 4  | 4  | WRNIP1   | 0.0282 |
| 6  | 4663878   | 4676575   | 5  | 6  | CDYL     | 0.0106 |
| 6  | 23883209  | 23906003  | 8  | 5  |          | 0.0088 |
| 6  | 37616607  | 37635955  | 4  | 5  | FLJ45825 | 0.0236 |
| 6  | 39200945  | 39214254  | 7  | 5  |          | 0.0100 |
| 6  | 117353122 | 117403717 | 4  | 19 | RFXDC1   | 0.0030 |
| 6  | 119898516 | 119914369 | 4  | 7  |          | 0.0222 |
| 6  | 162655871 | 162660096 | 4  | 6  | PARK2    | 0.0201 |
| 7  | 9177036   | 9190246   | 4  | 7  |          | 0.0205 |
| 7  | 13284537  | 13295146  | 5  | 4  |          | 0.0177 |
| 7  | 15445209  | 15469838  | 9  | 4  | TMEM195  | 0.0095 |
| 7  | 19339741  | 19366356  | 4  | 10 |          | 0.0223 |
| 7  | 28655263  | 28671580  | 4  | 5  | CREB5    | 0.0236 |
| 7  | 32173701  | 32195183  | 4  | 4  |          | 0.0282 |
| 7  | 35470724  | 35503030  | 5  | 6  |          | 0.0134 |
| 7  | 38064580  | 38078323  | 4  | 4  |          | 0.0248 |
| 7  | 42467012  | 42491390  | 4  | 8  |          | 0.0232 |
| 7  | 46759527  | 46782062  | 8  | 5  |          | 0.0088 |
| 7  | 46905831  | 46937852  | 10 | 6  |          | 0.0054 |
| 7  | 54893891  | 54918376  | 5  | 5  |          | 0.0151 |
| 7  | 77135477  | 77152754  | 4  | 7  |          | 0.0222 |
| 7  | 111888889 | 111896959 | 4  | 5  | IFRD1    | 0.0214 |
| 7  | 140653479 | 140663829 | 5  | 5  |          | 0.0136 |
| 8  | 3056359   | 3094761   | 11 | 12 | CSMD1    | 0.0019 |
| 8  | 4786983   | 4811413   | 5  | 5  | CSMD1    | 0.0151 |
| 8  | 6238342   | 6274083   | 4  | 7  | MCPH1    | 0.0281 |
| 8  | 15283611  | 15322656  | 9  | 8  |          | 0.0050 |
| 8  | 15692048  | 15713201  | 4  | 5  |          | 0.0251 |
| 8  | 18393182  | 18423793  | 4  | 6  |          | 0.0262 |
| 8  | 21493077  | 21505860  | 4  | 7  |          | 0.0205 |
| 8  | 32199213  | 32226575  | 9  | 4  | NRG1     | 0.0098 |
| 8  | 54269163  | 54299512  | 5  | 4  |          | 0.0216 |
| 8  | 56198701  | 56221035  | 5  | 4  | XKR4     | 0.0200 |
| 8  | 115903803 | 115922272 | 6  | 5  |          | 0.0117 |
| 8  | 129235452 | 129267085 | 5  | 5  |          | 0.0165 |
| 8  | 131870682 | 131915474 | 11 | 6  | ADCY8    | 0.0055 |
| 8  | 132476142 | 132507111 | 8  | 5  |          | 0.0108 |
| 8  | 135691115 | 135715753 | 9  | 6  | ZFAT1    | 0.0059 |
| 9  | 4010629   | 4025710   | 5  | 5  | GLIS3    | 0.0142 |
| 9  | 8164345   | 8188199   | 8  | 4  |          | 0.0111 |
| 9  | 16733441  | 16743455  | 7  | 5  | BNC2     | 0.0087 |
| 9  | 82292729  | 82324088  | 6  | 6  |          | 0.0111 |
| 9  | 98548498  | 98565308  | 10 | 5  | ZNF510   | 0.0057 |
| 9  | 105667384 | 105678132 | 5  | 5  |          | 0.0136 |
| 9  | 109401821 | 109408916 | 5  | 6  |          | 0.0104 |
| 9  | 117343285 | 117355509 | 4  | 4  |          | 0.0248 |
| 9  | 121554837 | 121570015 | 4  | 4  |          | 0.0248 |
| 10 | 2326924   | 2339357   | 4  | 4  |          | 0.0248 |
| 10 | 4335886   | 4351265   | 6  | 5  |          | 0.0117 |

|    |           |           |    |    |                                |        |
|----|-----------|-----------|----|----|--------------------------------|--------|
| 10 | 17037713  | 17086575  | 7  | 11 | CUBN                           | 0.0050 |
| 10 | 24820930  | 24847103  | 4  | 6  | KIAA1217                       | 0.0245 |
| 10 | 25794787  | 25824558  | 6  | 5  | GPR158                         | 0.0128 |
| 10 | 36514828  | 36526506  | 4  | 4  |                                | 0.0248 |
| 10 | 54320949  | 54350408  | 4  | 4  |                                | 0.0282 |
| 10 | 72016066  | 72025812  | 4  | 4  | PRF1                           | 0.0229 |
| 10 | 80586387  | 80607803  | 5  | 4  |                                | 0.0200 |
| 10 | 89418974  | 89472813  | 16 | 7  | PAPSS2                         | 0.0040 |
| 10 | 97313525  | 97362549  | 10 | 11 | ALDH18A1, SORBS1               | 0.0030 |
| 10 | 100128973 | 100149126 | 7  | 5  | C10orf33                       | 0.0097 |
| 10 | 106028196 | 106081085 | 4  | 13 | KIAA1754                       | 0.0065 |
| 10 | 118416353 | 118480052 | 16 | 10 | C10orf82, HSPA12A              | 0.0020 |
| 11 | 1576943   | 1607115   | 8  | 5  | KRTAP5-3, KRTAP5-5             | 0.0108 |
| 11 | 11122049  | 11147986  | 5  | 7  |                                | 0.0100 |
| 11 | 11346019  | 11359653  | 4  | 6  | GALNTL4                        | 0.0211 |
| 11 | 35319654  | 35343994  | 5  | 8  | SLC1A2                         | 0.0093 |
| 11 | 36686399  | 36707703  | 7  | 6  |                                | 0.0079 |
| 11 | 57549133  | 57568460  | 8  | 5  | OR6Q1, VN2R9P                  | 0.0087 |
| 11 | 78889654  | 78910751  | 5  | 4  |                                | 0.0200 |
| 11 | 87925679  | 87929030  | 6  | 4  | GRM5                           | 0.0127 |
| 11 | 88095026  | 88111682  | 4  | 5  | GRM5                           | 0.0236 |
| 11 | 88183404  | 88207021  | 4  | 7  | GRM5                           | 0.0236 |
| 11 | 90003835  | 90024933  | 5  | 4  |                                | 0.0200 |
| 11 | 117507582 | 117535296 | 9  | 4  | SCN2B, SCN4B                   | 0.0098 |
| 11 | 120201507 | 120227667 | 6  | 4  | GRIK4                          | 0.0163 |
| 12 | 5954452   | 5975760   | 4  | 5  | VWF                            | 0.0251 |
| 12 | 28063014  | 28074553  | 12 | 5  |                                | 0.0033 |
| 12 | 53644958  | 53704649  | 26 | 7  | KIAA0748                       | 0.0005 |
| 12 | 80315592  | 80341556  | 6  | 4  | PPFIA2                         | 0.0163 |
| 12 | 102769996 | 102815351 | 22 | 6  |                                | 0.0006 |
| 12 | 114214545 | 114265105 | 6  | 7  |                                | 0.0075 |
| 12 | 114523726 | 114549440 | 11 | 5  |                                | 0.0056 |
| 12 | 127467828 | 127500575 | 4  | 9  |                                | 0.0240 |
| 12 | 128793865 | 128819117 | 13 | 4  | TMEM132D                       | 0.0048 |
| 13 | 21194721  | 21221683  | 8  | 4  |                                | 0.0123 |
| 13 | 25981865  | 25995235  | 4  | 4  |                                | 0.0248 |
| 13 | 27864067  | 27892655  | 10 | 4  | FLT1                           | 0.0080 |
| 13 | 30208972  | 30225032  | 9  | 4  | ALOX5AP                        | 0.0089 |
| 13 | 60305634  | 60313485  | 5  | 5  |                                | 0.0131 |
| 13 | 64463933  | 64482043  | 6  | 6  |                                | 0.0093 |
| 13 | 84440888  | 84464746  | 11 | 4  |                                | 0.0069 |
| 13 | 92898354  | 92910211  | 4  | 4  | GPC6                           | 0.0248 |
| 14 | 21389400  | 21423943  | 13 | 5  | TRAV12-1,TRAV13-1,TRAV8-3,TRA@ | 0.0040 |
| 14 | 33309047  | 33322858  | 5  | 4  | NPAS3                          | 0.0177 |
| 14 | 57540518  | 57563968  | 6  | 5  | C14orf37                       | 0.0149 |
| 14 | 60991294  | 61031660  | 10 | 13 | PRKCH                          | 0.0028 |
| 14 | 68068686  | 68082222  | 5  | 4  | RAD51L1                        | 0.0177 |
| 14 | 96487821  | 96499623  | 5  | 4  |                                | 0.0177 |
| 15 | 28063745  | 28078024  | 6  | 4  |                                | 0.0142 |
| 15 | 52142632  | 52164106  | 8  | 4  | UNC13C                         | 0.0111 |
| 15 | 77684874  | 77701881  | 5  | 4  |                                | 0.0183 |
| 15 | 90348062  | 90370961  | 8  | 6  | SLCO3A1                        | 0.0070 |
| 16 | 6285925   | 6343776   | 15 | 4  | A2BP1                          | 0.0070 |



|    |          |          |    |    |                 |        |
|----|----------|----------|----|----|-----------------|--------|
| 16 | 6604055  | 6622204  | 5  | 4  | A2BP1           | 0.0183 |
| 16 | 6695415  | 6722737  | 4  | 6  | A2BP1           | 0.0245 |
| 16 | 7640614  | 7673810  | 6  | 6  | A2BP1           | 0.0111 |
| 16 | 56783625 | 56821913 | 9  | 8  |                 | 0.0050 |
| 16 | 63678539 | 63699968 | 4  | 4  | CDH11           | 0.0282 |
| 16 | 70869327 | 70887011 | 4  | 5  |                 | 0.0236 |
| 16 | 76412206 | 76453522 | 5  | 8  | KIAA1576        | 0.0108 |
| 16 | 77411027 | 77444363 | 16 | 4  | WVOX            | 0.0031 |
| 16 | 78144242 | 78168710 | 4  | 7  |                 | 0.0236 |
| 16 | 79127742 | 79144221 | 8  | 5  | DYNLRB2         | 0.0087 |
| 16 | 79953788 | 79990571 | 4  | 7  |                 | 0.0281 |
| 16 | 81258834 | 81284585 | 8  | 7  | CDH13           | 0.0064 |
| 16 | 81364154 | 81394958 | 13 | 5  | CDH13           | 0.0040 |
| 16 | 81820098 | 81868770 | 4  | 16 | CDH13           | 0.0050 |
| 16 | 84693857 | 84711479 | 4  | 4  |                 | 0.0248 |
| 16 | 84943714 | 84996559 | 11 | 10 |                 | 0.0030 |
| 17 | 3154169  | 3161719  | 10 | 4  | OR3A4           | 0.0062 |
| 17 | 9910218  | 9948656  | 4  | 5  | GAS7            | 0.0307 |
| 17 | 11199762 | 11216770 | 5  | 6  | FLJ45455        | 0.0114 |
| 17 | 14264098 | 14290428 | 4  | 5  |                 | 0.0254 |
| 17 | 36844906 | 36884548 | 7  | 16 | KRT32, KRT38    | 0.0025 |
| 18 | 652370   | 674766   | 8  | 4  | ENOSF1, TYMS    | 0.0111 |
| 18 | 3209215  | 3219023  | 7  | 4  | MYOM1           | 0.0105 |
| 18 | 5950673  | 5966903  | 4  | 5  | L3MBTL4         | 0.0236 |
| 18 | 31933579 | 31955587 | 8  | 4  | ELP2, SLC39A6   | 0.0111 |
| 18 | 51199883 | 51218182 | 8  | 4  | TCF4            | 0.0104 |
| 18 | 72289304 | 72313005 | 4  | 4  | ZNF516          | 0.0282 |
| 18 | 74013910 | 74023976 | 5  | 4  |                 | 0.0177 |
| 19 | 6926998  | 6933336  | 4  | 5  | EMR4            | 0.0214 |
| 20 | 8063957  | 8098408  | 6  | 4  | PLCB1           | 0.0174 |
| 20 | 9573787  | 9597288  | 10 | 4  | PAK7            | 0.0075 |
| 20 | 12924151 | 12938482 | 8  | 4  | SPTLC3          | 0.0101 |
| 20 | 15409635 | 15424726 | 7  | 4  | MACROD2         | 0.0126 |
| 20 | 16679408 | 16695738 | 4  | 5  | OTOR            | 0.0236 |
| 20 | 17421671 | 17446930 | 10 | 5  | BFSP1, RPS27AP2 | 0.0062 |
| 20 | 40034283 | 40045102 | 5  | 4  |                 | 0.0177 |
| 20 | 52138031 | 52170007 | 8  | 4  |                 | 0.0131 |
| 21 | 24988736 | 25031874 | 9  | 5  |                 | 0.0117 |
| 22 | 24957142 | 25011209 | 7  | 13 | SEZ6L           | 0.0045 |
| 22 | 25094638 | 25131527 | 7  | 4  |                 | 0.0130 |
| 22 | 31884373 | 31896587 | 4  | 5  |                 | 0.0223 |
| 22 | 32912694 | 32943347 | 9  | 5  |                 | 0.0083 |
| 22 | 43494161 | 43512004 | 6  | 4  | PRR5            | 0.0144 |
| 22 | 48459258 | 48481837 | 4  | 4  |                 | 0.0282 |

**Table S3:** v1.0 SNPs. Columns list rs SNP designator, chromosome, basepair, allele associated with abstinence, and weight for the SNP in contributing to the v1.0 score.

| <i>rs</i>  | <i>chr</i> | <i>bp</i> | <i>quit allele</i> | <i>weight</i> |
|------------|------------|-----------|--------------------|---------------|
| rs2281173  | 1          | 1678052   | G                  | 0.01368       |
| rs41477744 | 1          | 2319424   | A                  | 0.00449       |
| rs7525173  | 1          | 2986056   | G                  | 0.00328       |
| rs17398063 | 1          | 3162562   | A                  | 0.00143       |
| rs1181889  | 1          | 3660887   | G                  | 0.01408       |
| rs3856168  | 1          | 4016464   | G                  | 0.00059       |
| rs7529853  | 1          | 4032742   | G                  | 0.00759       |
| rs12042555 | 1          | 4358909   | T                  | 0.01567       |
| rs1870506  | 1          | 4360565   | G                  | 0.00057       |
| rs4654433  | 1          | 4381492   | T                  | 0.01075       |
| rs4654606  | 1          | 4758268   | G                  | 0.00368       |
| rs11805663 | 1          | 4806218   | A                  | 0.00234       |
| rs2169089  | 1          | 4988477   | C                  | 0.01275       |
| rs6681359  | 1          | 5100592   | T                  | 0.00333       |
| rs4076635  | 1          | 5130606   | A                  | 0.00574       |
| rs648378   | 1          | 5225784   | G                  | 0.00619       |
| rs11576458 | 1          | 5398168   | C                  | 0.00619       |
| rs11576460 | 1          | 5398185   | C                  | 0.00203       |
| rs1695629  | 1          | 5640603   | C                  | 0.00648       |
| rs1695628  | 1          | 5641161   | A                  | 0.01016       |
| rs811284   | 1          | 5662225   | T                  | 0.00457       |
| rs17429690 | 1          | 5736722   | G                  | 0.00285       |
| rs4845825  | 1          | 5827331   | C                  | 0.01516       |
| rs1476047  | 1          | 7234759   | C                  | 0.00013       |
| rs11120894 | 1          | 7263431   | G                  | 0.01447       |
| rs1309332  | 1          | 7475048   | G                  | 0.00449       |
| rs226473   | 1          | 7931555   | G                  | 0.01380       |
| rs225100   | 1          | 7989501   | T                  | 0.00188       |
| rs12136685 | 1          | 8114379   | C                  | 0.00783       |
| rs6701941  | 1          | 8191302   | G                  | 0.01088       |
| rs11121182 | 1          | 8445140   | T                  | 0.00107       |
| rs10864363 | 1          | 8689898   | T                  | 0.00273       |
| rs4908526  | 1          | 9025544   | G                  | 0.00289       |
| rs17377597 | 1          | 9304069   | G                  | 0.01208       |
| rs1294055  | 1          | 9304621   | A                  | 0.00697       |
| rs564709   | 1          | 9304872   | C                  | 0.01065       |
| rs926247   | 1          | 9316595   | G                  | 0.00806       |
| rs2890358  | 1          | 9950127   | A                  | 0.01006       |

|            |   |          |   |         |
|------------|---|----------|---|---------|
| rs11121543 | 1 | 10326770 | A | 0.00115 |
| rs11121594 | 1 | 10549509 | G | 0.01454 |
| rs6687502  | 1 | 10555860 | G | 0.01521 |
| rs539790   | 1 | 10810510 | A | 0.01080 |
| rs1057079  | 1 | 11127645 | A | 0.00050 |
| rs2379161  | 1 | 11442367 | T | 0.00436 |
| rs198404   | 1 | 11819414 | A | 0.01213 |
| rs3766735  | 1 | 12117332 | A | 0.00397 |
| rs17423806 | 1 | 12363507 | A | 0.00956 |
| rs3000873  | 1 | 12692907 | T | 0.01227 |
| rs3856278  | 1 | 13732157 | G | 0.00038 |
| rs2990672  | 1 | 13791216 | G | 0.01527 |
| rs1772635  | 1 | 13820812 | A | 0.01612 |
| rs17390405 | 1 | 13821674 | T | 0.00511 |
| rs7545744  | 1 | 14361606 | A | 0.01574 |
| rs6692603  | 1 | 14367357 | T | 0.00687 |
| rs10489144 | 1 | 14367590 | C | 0.01018 |
| rs10489143 | 1 | 14368482 | C | 0.00197 |
| rs12145446 | 1 | 14790404 | G | 0.01341 |
| rs1543362  | 1 | 14791672 | C | 0.00331 |
| rs2486778  | 1 | 14793530 | C | 0.00815 |
| rs6690379  | 1 | 14834248 | A | 0.00629 |
| rs1965402  | 1 | 15190986 | T | 0.00927 |
| rs529587   | 1 | 15302815 | G | 0.01509 |
| rs7539166  | 1 | 15368492 | C | 0.01170 |
| rs10927744 | 1 | 15439286 | A | 0.00715 |
| rs2020902  | 1 | 15706947 | T | 0.00618 |
| rs6429753  | 1 | 15773124 | A | 7.09600 |
| rs6696286  | 1 | 15841357 | C | 0.01226 |
| rs12082523 | 1 | 15878379 | G | 8.20600 |
| rs10887994 | 1 | 17244342 | G | 0.00513 |
| rs7536679  | 1 | 17247250 | G | 0.00974 |
| rs7545518  | 1 | 17247329 | G | 0.01214 |
| rs2295053  | 1 | 17273681 | C | 0.00959 |
| rs1408953  | 1 | 17751206 | A | 0.00272 |
| rs11203233 | 1 | 18113284 | T | 0.00254 |
| rs2355459  | 1 | 18222351 | T | 0.00473 |
| rs12724674 | 1 | 18304088 | T | 0.01459 |
| rs10907298 | 1 | 18436270 | C | 0.00964 |
| rs1414642  | 1 | 18660033 | A | 0.00248 |
| rs2745318  | 1 | 18768431 | C | 0.00620 |
| rs4076925  | 1 | 18985613 | C | 0.01623 |
| rs4911974  | 1 | 19315095 | C | 0.01592 |
| rs6662273  | 1 | 19613410 | A | 0.00951 |

|            |   |          |   |         |
|------------|---|----------|---|---------|
| rs3929668  | 1 | 19924960 | A | 0.00164 |
| rs6426624  | 1 | 20445225 | T | 0.00968 |
| rs12741740 | 1 | 20671182 | T | 0.00636 |
| rs1253885  | 1 | 20759354 | G | 0.00106 |
| rs535696   | 1 | 20893785 | C | 0.01650 |
| rs6702859  | 1 | 20904570 | C | 0.01409 |
| rs875015   | 1 | 20906226 | G | 0.00870 |
| rs6426645  | 1 | 20907736 | T | 0.01070 |
| rs637990   | 1 | 20920203 | A | 0.00165 |
| rs12123092 | 1 | 20939588 | A | 0.00982 |
| rs1021077  | 1 | 20978603 | G | 0.00762 |
| rs3856173  | 1 | 20987420 | T | 0.01037 |
| rs4654874  | 1 | 21029254 | T | 0.00305 |
| rs4654887  | 1 | 21107510 | A | 0.01357 |
| rs6700718  | 1 | 21171950 | A | 0.01238 |
| rs6659152  | 1 | 21228428 | G | 0.00220 |
| rs1354792  | 1 | 21264462 | C | 0.01048 |
| rs4654899  | 1 | 21282818 | T | 0.00528 |
| rs12402486 | 1 | 21320522 | A | 0.00794 |
| rs6702110  | 1 | 21388493 | G | 0.00017 |
| rs6680566  | 1 | 22101677 | T | 0.01070 |
| rs4233289  | 1 | 22663042 | G | 0.01481 |
| rs3754010  | 1 | 22709086 | T | 0.00810 |
| rs209722   | 1 | 22716015 | T | 0.01651 |
| rs209705   | 1 | 22807231 | A | 0.00457 |
| rs12722729 | 1 | 22854653 | A | 0.00429 |
| rs6424106  | 1 | 24771040 | G | 0.00025 |
| rs6687818  | 1 | 24774585 | A | 0.00699 |
| rs9328948  | 1 | 24790043 | C | 0.01255 |
| rs3131502  | 1 | 24939035 | G | 0.00805 |
| rs1890449  | 1 | 24948388 | G | 0.00484 |
| rs2744785  | 1 | 25904621 | C | 0.00587 |
| rs807262   | 1 | 25953638 | A | 0.00282 |
| rs11805628 | 1 | 27257576 | G | 0.00749 |
| rs2808419  | 1 | 27892967 | G | 0.00385 |
| rs1474908  | 1 | 28085800 | C | 0.00009 |
| rs4908393  | 1 | 28423035 | A | 0.01124 |
| rs9508     | 1 | 28436866 | G | 0.00703 |
| rs576550   | 1 | 28439195 | A | 0.01659 |
| rs2319403  | 1 | 29493343 | C | 0.00258 |
| rs1062921  | 1 | 29525262 | T | 0.01438 |
| rs4078312  | 1 | 29688232 | A | 0.00117 |
| rs12141268 | 1 | 29948179 | G | 0.01536 |
| rs6691847  | 1 | 30038239 | T | 0.00410 |

|            |   |          |   |         |
|------------|---|----------|---|---------|
| rs10798897 | 1 | 30091340 | A | 0.00943 |
| rs267665   | 1 | 30318309 | G | 0.01207 |
| rs1321117  | 1 | 30400206 | T | 0.01223 |
| rs976190   | 1 | 30435437 | G | 0.00492 |
| rs10915041 | 1 | 30438106 | C | 0.01439 |
| rs941518   | 1 | 30445358 | C | 0.00030 |
| rs657200   | 1 | 30600394 | A | 0.01145 |
| rs1188418  | 1 | 30917979 | C | 0.01108 |
| rs10798817 | 1 | 31236168 | T | 0.01366 |
| rs10914267 | 1 | 31341380 | G | 0.00553 |
| rs695161   | 1 | 32516453 | C | 0.01260 |
| rs9425886  | 1 | 32804999 | C | 0.01442 |
| rs10914683 | 1 | 33562225 | T | 0.01314 |
| rs7512470  | 1 | 33568816 | C | 0.00297 |
| rs10914731 | 1 | 33707411 | A | 0.00597 |
| rs9943259  | 1 | 33732649 | A | 0.00283 |
| rs2641953  | 1 | 33773922 | G | 0.00378 |
| rs1690551  | 1 | 33808148 | C | 0.01306 |
| rs618915   | 1 | 33883684 | T | 0.00913 |
| rs12410640 | 1 | 34464326 | G | 0.00999 |
| rs10914890 | 1 | 34478745 | T | 0.00231 |
| rs10799034 | 1 | 34506613 | A | 0.01539 |
| rs771396   | 1 | 34506764 | G | 0.01655 |
| rs7524118  | 1 | 34508639 | T | 0.01598 |
| rs1361670  | 1 | 34510599 | T | 0.01495 |
| rs880017   | 1 | 34514192 | A | 0.01456 |
| rs6425886  | 1 | 34514539 | T | 0.01462 |
| rs979336   | 1 | 34514843 | A | 0.01667 |
| rs1342153  | 1 | 34515663 | T | 0.01396 |
| rs9661105  | 1 | 34521341 | C | 0.01621 |
| rs11811387 | 1 | 36689888 | T | 0.01210 |
| rs2180133  | 1 | 36791227 | T | 0.00621 |
| rs507460   | 1 | 37265793 | G | 0.00927 |
| rs218427   | 1 | 37419327 | T | 0.01660 |
| rs4653300  | 1 | 37796641 | G | 0.00061 |
| rs4970570  | 1 | 38397365 | T | 0.01180 |
| rs1809329  | 1 | 38397962 | A | 0.00482 |
| rs6683126  | 1 | 38453613 | A | 0.01205 |
| rs16825491 | 1 | 39002571 | C | 0.01016 |
| rs2296456  | 1 | 39111843 | G | 0.00818 |
| rs364716   | 1 | 39332697 | G | 0.00589 |
| rs4660603  | 1 | 39508921 | C | 0.00393 |
| rs41373150 | 1 | 39632487 | G | 0.00682 |
| rs704771   | 1 | 39933600 | T | 0.00158 |

|            |   |          |   |         |
|------------|---|----------|---|---------|
| rs914961   | 1 | 40015032 | T | 0.00638 |
| rs1974206  | 1 | 40081505 | C | 0.00703 |
| rs927961   | 1 | 41018888 | C | 0.00728 |
| rs4660527  | 1 | 41594366 | G | 0.00852 |
| rs7519983  | 1 | 41855956 | C | 0.00291 |
| rs11210537 | 1 | 42118310 | A | 0.00640 |
| rs642112   | 1 | 42225904 | C | 0.00528 |
| rs10890176 | 1 | 42276537 | A | 0.00741 |
| rs17377240 | 1 | 42496837 | G | 0.00168 |
| rs16829690 | 1 | 42793281 | C | 0.00138 |
| rs323720   | 1 | 43043620 | A | 0.01476 |
| rs9326136  | 1 | 44162979 | A | 0.00679 |
| rs12561948 | 1 | 44168783 | A | 0.00928 |
| rs2486013  | 1 | 44192835 | T | 0.00083 |
| rs7412307  | 1 | 44206451 | G | 0.00559 |
| rs270724   | 1 | 44763865 | G | 0.01596 |
| rs12749130 | 1 | 45220386 | C | 0.00116 |
| rs2997465  | 1 | 45414041 | A | 0.00936 |
| rs785495   | 1 | 46360474 | G | 0.00340 |
| rs3855959  | 1 | 46406461 | T | 0.00517 |
| rs956527   | 1 | 46828579 | C | 0.00113 |
| rs611468   | 1 | 46897066 | A | 0.00010 |
| rs2065996  | 1 | 47047828 | T | 0.00633 |
| rs4926559  | 1 | 47744233 | G | 0.00219 |
| rs11211546 | 1 | 47764798 | C | 0.00963 |
| rs623229   | 1 | 47799654 | A | 0.00437 |
| rs4927198  | 1 | 48135868 | C | 0.00515 |
| rs17104537 | 1 | 48819755 | A | 0.00012 |
| rs320017   | 1 | 48847582 | T | 0.00117 |
| rs319999   | 1 | 48896294 | G | 0.00412 |
| rs10788896 | 1 | 49089826 | A | 0.01146 |
| rs4926853  | 1 | 50481809 | A | 0.00246 |
| rs3789586  | 1 | 50826910 | A | 0.00394 |
| rs12083078 | 1 | 50839538 | A | 0.01626 |
| rs2244262  | 1 | 52149357 | C | 0.01534 |
| rs10493166 | 1 | 52669983 | A | 0.00667 |
| rs17108402 | 1 | 53618841 | C | 0.01152 |
| rs9700109  | 1 | 53781964 | A | 0.01472 |
| rs11206279 | 1 | 54291746 | C | 0.00893 |
| rs4927088  | 1 | 54547791 | C | 0.00962 |
| rs11206329 | 1 | 54550150 | T | 0.01115 |
| rs2289015  | 1 | 54847650 | C | 0.00617 |
| rs9332417  | 1 | 54891877 | G | 0.00063 |
| rs598130   | 1 | 54910882 | A | 0.01237 |

|            |   |          |   |          |
|------------|---|----------|---|----------|
| rs498831   | 1 | 54916688 | G | 17.06800 |
| rs17575462 | 1 | 55077424 | G | 0.00922  |
| rs2495505  | 1 | 55257398 | A | 0.00710  |
| rs11206510 | 1 | 55268627 | A | 0.01615  |
| rs11206601 | 1 | 55704335 | G | 0.01019  |
| rs874664   | 1 | 55705932 | C | 0.01579  |
| rs1392128  | 1 | 55839140 | C | 0.01073  |
| rs1039296  | 1 | 55876247 | T | 0.00447  |
| rs12124393 | 1 | 55885953 | A | 0.00984  |
| rs2767515  | 1 | 55938330 | G | 0.00554  |
| rs2767499  | 1 | 55973612 | C | 0.00081  |
| rs4927271  | 1 | 56091975 | C | 0.01056  |
| rs12029607 | 1 | 56218693 | G | 0.00829  |
| rs12070360 | 1 | 56534979 | A | 0.00592  |
| rs635833   | 1 | 57150398 | C | 0.00476  |
| rs17115362 | 1 | 57444736 | G | 0.01299  |
| rs2805860  | 1 | 57800162 | C | 0.01114  |
| rs947242   | 1 | 57815437 | C | 0.00476  |
| rs3131734  | 1 | 57981808 | T | 0.01108  |
| rs3131745  | 1 | 58011280 | C | 0.00727  |
| rs17519861 | 1 | 58110103 | C | 0.00714  |
| rs1187994  | 1 | 58225892 | C | 0.00103  |
| rs1187988  | 1 | 58238604 | T | 0.00438  |
| rs12028704 | 1 | 58250950 | T | 0.00335  |
| rs11207153 | 1 | 58254617 | G | 0.01085  |
| rs1342876  | 1 | 58351200 | C | 0.00770  |
| rs1953811  | 1 | 58426951 | T | 0.00291  |
| rs4567304  | 1 | 58592505 | A | 0.00722  |
| rs17496545 | 1 | 58599898 | G | 0.01536  |
| rs697585   | 1 | 58658783 | C | 0.01109  |
| rs706430   | 1 | 58675926 | T | 0.01611  |
| rs706450   | 1 | 58688212 | G | 0.00528  |
| rs17117850 | 1 | 58820094 | A | 0.00185  |
| rs12030196 | 1 | 59255908 | A | 0.01381  |
| rs6587854  | 1 | 59668122 | A | 0.00438  |
| rs10493267 | 1 | 59831294 | A | 0.01544  |
| rs10489421 | 1 | 60057975 | G | 0.00743  |
| rs11572293 | 1 | 60142349 | G | 0.00520  |
| rs12043321 | 1 | 60901183 | G | 0.01145  |
| rs334728   | 1 | 61381595 | G | 0.00170  |
| rs7553245  | 1 | 62116567 | T | 0.00442  |
| rs12759978 | 1 | 62418770 | G | 0.01144  |
| rs6680953  | 1 | 62471657 | C | 0.01057  |
| rs6662848  | 1 | 63219665 | A | 0.00112  |

|            |   |          |   |          |
|------------|---|----------|---|----------|
| rs1498936  | 1 | 63347843 | A | 0.01523  |
| rs11589776 | 1 | 63516591 | A | 0.00077  |
| rs10789136 | 1 | 63602934 | C | 0.00650  |
| rs2036867  | 1 | 63679468 | T | 19.69600 |
| rs12078371 | 1 | 63755548 | C | 0.00181  |
| rs2269239  | 1 | 63881947 | C | 0.00693  |
| rs11208264 | 1 | 63897660 | G | 0.00309  |
| rs2013012  | 1 | 63900797 | A | 0.00472  |
| rs6678106  | 1 | 63932834 | G | 0.01245  |
| rs4915919  | 1 | 63967631 | G | 0.00793  |
| rs285393   | 1 | 64245244 | G | 0.00380  |
| rs285400   | 1 | 64250080 | G | 0.00469  |
| rs834489   | 1 | 64260828 | T | 0.00370  |
| rs1073712  | 1 | 64332677 | A | 0.00054  |
| rs305565   | 1 | 64737146 | C | 0.00701  |
| rs310196   | 1 | 65124210 | G | 0.01098  |
| rs7553101  | 1 | 65192778 | G | 0.00816  |
| rs4916031  | 1 | 65454131 | T | 0.00702  |
| rs6677191  | 1 | 65461049 | T | 0.00802  |
| rs11208615 | 1 | 65490298 | C | 0.00200  |
| rs3790432  | 1 | 65808327 | T | 0.01626  |
| rs3790426  | 1 | 65815607 | T | 0.01343  |
| rs11208724 | 1 | 65951791 | T | 0.00337  |
| rs2503197  | 1 | 66217237 | C | 0.01638  |
| rs1317611  | 1 | 66224365 | G | 0.00596  |
| rs2186122  | 1 | 66242794 | T | 0.00141  |
| rs2489907  | 1 | 66246509 | T | 0.00987  |
| rs4655605  | 1 | 66551081 | T | 0.00384  |
| rs783051   | 1 | 66621998 | A | 0.01255  |
| rs11208943 | 1 | 66915263 | G | 0.00323  |
| rs12082503 | 1 | 67262097 | A | 0.00986  |
| rs2863212  | 1 | 67457704 | T | 0.00910  |
| rs4655769  | 1 | 68249566 | C | 0.00838  |
| rs10789263 | 1 | 68721727 | C | 0.01275  |
| rs1924529  | 1 | 68794759 | A | 0.01439  |
| rs2507189  | 1 | 68823722 | C | 0.01219  |
| rs2815432  | 1 | 69500552 | T | 0.01104  |
| rs11209479 | 1 | 69737991 | A | 0.00091  |
| rs1773337  | 1 | 69853184 | G | 0.00652  |
| rs12078287 | 1 | 69869202 | T | 0.00479  |
| rs11209514 | 1 | 69913646 | T | 0.01595  |
| rs12133092 | 1 | 69916151 | G | 0.01412  |
| rs12022970 | 1 | 69921347 | T | 0.00387  |
| rs1340751  | 1 | 69946292 | A | 0.00755  |



|            |   |          |   |         |
|------------|---|----------|---|---------|
| rs17131142 | 1 | 70272500 | A | 0.01629 |
| rs12025814 | 1 | 70272705 | T | 0.00892 |
| rs2274913  | 1 | 70461803 | G | 0.01128 |
| rs7548299  | 1 | 71190213 | A | 0.00951 |
| rs2125777  | 1 | 72011020 | C | 0.00695 |
| rs1491198  | 1 | 72015178 | A | 0.00824 |
| rs12025922 | 1 | 72101628 | T | 0.00557 |
| rs10789340 | 1 | 72712861 | T | 0.00101 |
| rs17092782 | 1 | 72714547 | C | 0.00007 |
| rs647478   | 1 | 73692628 | G | 0.01588 |
| rs12140865 | 1 | 73705474 | A | 0.01463 |
| rs6701520  | 1 | 73713306 | T | 0.01378 |
| rs7534840  | 1 | 73748346 | T | 0.01361 |
| rs4540593  | 1 | 73843197 | A | 0.00102 |
| rs685512   | 1 | 74868620 | A | 0.01272 |
| rs696667   | 1 | 74922100 | A | 0.01147 |
| rs1475396  | 1 | 75014984 | G | 0.00547 |
| rs10874274 | 1 | 75024722 | G | 0.00362 |
| rs927904   | 1 | 75032916 | G | 0.01147 |
| rs1146405  | 1 | 75068080 | T | 0.01541 |
| rs10493550 | 1 | 75232921 | A | 0.00965 |
| rs1251546  | 1 | 76215417 | A | 0.01577 |
| rs1251513  | 1 | 76293782 | C | 0.01238 |
| rs3011997  | 1 | 76399642 | A | 0.00293 |
| rs10782606 | 1 | 76453810 | G | 0.00557 |
| rs11162132 | 1 | 76605696 | G | 0.01400 |
| rs10873889 | 1 | 76734548 | T | 0.01228 |
| rs425149   | 1 | 76770433 | A | 0.00510 |
| rs962667   | 1 | 76990046 | C | 0.01544 |
| rs12126117 | 1 | 77512410 | G | 0.00508 |
| rs2647517  | 1 | 77663242 | T | 0.00044 |
| rs17101082 | 1 | 78173795 | A | 0.00460 |
| rs12731181 | 1 | 78775177 | G | 0.00168 |
| rs1333978  | 1 | 78820018 | T | 0.00009 |
| rs12143872 | 1 | 79355195 | C | 0.00595 |
| rs12751985 | 1 | 79778531 | A | 0.00680 |
| rs2374186  | 1 | 79849115 | A | 0.00150 |
| rs6672282  | 1 | 79972153 | T | 0.00401 |
| rs1325200  | 1 | 80190582 | G | 0.00014 |
| rs981126   | 1 | 80304382 | T | 0.00096 |
| rs35020936 | 1 | 80577091 | T | 0.00434 |
| rs2997195  | 1 | 80611468 | A | 0.00174 |
| rs1365752  | 1 | 80629549 | A | 0.00761 |
| rs11163047 | 1 | 80780548 | G | 0.00113 |

|            |   |          |   |         |
|------------|---|----------|---|---------|
| rs2105126  | 1 | 80982713 | G | 0.00590 |
| rs2147084  | 1 | 81031531 | C | 0.01168 |
| rs17105708 | 1 | 81165299 | T | 0.00904 |
| rs17456431 | 1 | 81859331 | C | 0.00831 |
| rs11163376 | 1 | 82026944 | G | 0.00633 |
| rs927902   | 1 | 82761041 | C | 0.00484 |
| rs10493720 | 1 | 82851559 | G | 0.01317 |
| rs319671   | 1 | 82910287 | T | 0.00610 |
| rs323972   | 1 | 83308402 | G | 0.00432 |
| rs10874393 | 1 | 83798720 | T | 0.01210 |
| rs6704084  | 1 | 83807136 | T | 0.00783 |
| rs11163794 | 1 | 83883604 | C | 0.00657 |
| rs6676587  | 1 | 84049017 | T | 0.00213 |
| rs626376   | 1 | 84288631 | T | 0.00506 |
| rs315537   | 1 | 84591181 | A | 0.00707 |
| rs4907110  | 1 | 85143853 | T | 0.00533 |
| rs10782539 | 1 | 85319858 | G | 0.01091 |
| rs9803850  | 1 | 85843032 | C | 0.00228 |
| rs10493773 | 1 | 85898341 | C | 0.00214 |
| rs12143304 | 1 | 86278343 | G | 0.01173 |
| rs7550571  | 1 | 86350458 | A | 0.00413 |
| rs985616   | 1 | 86412217 | T | 0.00020 |
| rs12755828 | 1 | 86556035 | C | 0.00251 |
| rs692739   | 1 | 86930717 | G | 0.00347 |
| rs2390220  | 1 | 87227506 | G | 0.00763 |
| rs6675309  | 1 | 87397317 | G | 0.00161 |
| rs1888337  | 1 | 87542558 | T | 0.01034 |
| rs4655952  | 1 | 87549430 | A | 0.00038 |
| rs4655959  | 1 | 87661388 | A | 0.01090 |
| rs6692873  | 1 | 88533008 | A | 0.01457 |
| rs306336   | 1 | 88745467 | A | 0.01517 |
| rs11590752 | 1 | 88841271 | G | 0.00029 |
| rs430600   | 1 | 88998564 | A | 0.00802 |
| rs12405169 | 1 | 89088833 | G | 0.01587 |
| rs10922504 | 1 | 89134355 | G | 0.00106 |
| rs1325922  | 1 | 89200041 | G | 0.00047 |
| rs6667970  | 1 | 89429449 | C | 0.01043 |
| rs17491902 | 1 | 89788753 | A | 0.01666 |
| rs10922700 | 1 | 89925873 | G | 0.00183 |
| rs12142526 | 1 | 90177778 | A | 0.01439 |
| rs2802019  | 1 | 90224707 | G | 0.00515 |
| rs2490113  | 1 | 90228685 | C | 0.01390 |
| rs1775585  | 1 | 91031704 | G | 0.00851 |
| rs10493841 | 1 | 91048019 | G | 0.00983 |

|            |   |          |   |         |
|------------|---|----------|---|---------|
| rs10922929 | 1 | 91051894 | G | 0.01511 |
| rs1725430  | 1 | 91052106 | T | 0.00904 |
| rs12567930 | 1 | 91573534 | G | 0.01492 |
| rs12031457 | 1 | 91709536 | C | 0.01175 |
| rs41436349 | 1 | 91799747 | C | 0.00014 |
| rs284164   | 1 | 92041655 | T | 0.01015 |
| rs11165840 | 1 | 92173025 | A | 0.00604 |
| rs766665   | 1 | 92191962 | C | 0.01542 |
| rs12090761 | 1 | 92664188 | A | 0.01036 |
| rs6687359  | 1 | 93532515 | G | 0.00140 |
| rs4847409  | 1 | 93568520 | G | 0.01122 |
| rs4075523  | 1 | 93991061 | C | 0.01157 |
| rs4240956  | 1 | 93996357 | A | 0.00548 |
| rs7515462  | 1 | 94000572 | G | 0.01260 |
| rs2391313  | 1 | 94014144 | A | 0.01312 |
| rs1004197  | 1 | 94022128 | C | 0.00807 |
| rs6692717  | 1 | 94055681 | C | 0.01209 |
| rs41351346 | 1 | 94218381 | A | 0.01419 |
| rs3789391  | 1 | 94251926 | T | 0.01465 |
| rs1749541  | 1 | 94730966 | T | 0.01568 |
| rs7555399  | 1 | 94762365 | T | 0.00467 |
| rs1760512  | 1 | 94984405 | G | 0.00789 |
| rs12048606 | 1 | 95065079 | C | 0.00803 |
| rs10489810 | 1 | 95102023 | T | 0.01607 |
| rs859047   | 1 | 95150991 | G | 0.00898 |
| rs7512953  | 1 | 95326882 | A | 0.00075 |
| rs11165314 | 1 | 95362975 | A | 0.01586 |
| rs2039613  | 1 | 95462704 | T | 0.00192 |
| rs945826   | 1 | 95756744 | C | 0.00406 |
| rs10489562 | 1 | 95831138 | G | 0.01581 |
| rs1509173  | 1 | 95848258 | A | 0.01362 |
| rs621485   | 1 | 95860780 | T | 0.01417 |
| rs12405938 | 1 | 96158814 | A | 0.00221 |
| rs1146530  | 1 | 96265077 | G | 0.00415 |
| rs2391735  | 1 | 96377557 | T | 0.00451 |
| rs12564030 | 1 | 96475283 | T | 0.00876 |
| rs1994375  | 1 | 96486632 | G | 0.00105 |
| rs2391782  | 1 | 96999263 | A | 0.01437 |
| rs635578   | 1 | 97077159 | A | 0.00799 |
| rs11165874 | 1 | 97680832 | G | 0.00881 |
| rs3956688  | 1 | 97777306 | C | 0.01063 |
| rs7535694  | 1 | 97863533 | C | 0.00873 |
| rs17383059 | 1 | 98648030 | G | 0.01106 |
| rs11166018 | 1 | 98695503 | C | 0.00889 |

|            |   |           |   |         |
|------------|---|-----------|---|---------|
| rs4950128  | 1 | 98699702  | G | 0.00331 |
| rs11801576 | 1 | 99197962  | A | 0.00849 |
| rs302756   | 1 | 99382703  | A | 0.01384 |
| rs302765   | 1 | 99390673  | C | 0.00581 |
| rs668206   | 1 | 99416551  | C | 0.01247 |
| rs17120121 | 1 | 99475924  | G | 0.01332 |
| rs819908   | 1 | 99535247  | T | 0.00851 |
| rs2392028  | 1 | 99620365  | A | 0.00186 |
| rs7529598  | 1 | 99871758  | G | 0.01549 |
| rs10875240 | 1 | 99872120  | G | 0.01600 |
| rs1890410  | 1 | 99923412  | G | 0.00921 |
| rs12141159 | 1 | 99950114  | C | 0.01641 |
| rs1565744  | 1 | 100050187 | A | 0.00257 |
| rs2307130  | 1 | 100089177 | C | 0.01203 |
| rs11166407 | 1 | 100410296 | T | 0.00978 |
| rs6577171  | 1 | 100659558 | T | 0.01382 |
| rs7548917  | 1 | 101011964 | T | 0.01250 |
| rs7545402  | 1 | 101093664 | C | 0.00223 |
| rs17124135 | 1 | 101542689 | T | 0.00061 |
| rs12072589 | 1 | 101847063 | A | 0.00559 |
| rs6663652  | 1 | 101917302 | C | 0.00449 |
| rs2039942  | 1 | 102070334 | A | 0.01132 |
| rs17125608 | 1 | 102099731 | A | 0.00350 |
| rs7515984  | 1 | 102167808 | G | 0.01505 |
| rs755181   | 1 | 102176835 | G | 0.01003 |
| rs7512461  | 1 | 102181350 | A | 0.01624 |
| rs11583344 | 1 | 102184466 | G | 0.01651 |
| rs10493978 | 1 | 102351895 | T | 0.00958 |
| rs11164392 | 1 | 102356421 | A | 0.01581 |
| rs1272970  | 1 | 102602312 | G | 0.01548 |
| rs1823549  | 1 | 102920419 | A | 0.00780 |
| rs1451031  | 1 | 102967249 | A | 0.00079 |
| rs12116936 | 1 | 104439177 | T | 0.01194 |
| rs10736036 | 1 | 104981896 | T | 0.00122 |
| rs12039389 | 1 | 105460596 | G | 0.00417 |
| rs12066081 | 1 | 106437715 | A | 0.00149 |
| rs4417097  | 1 | 106601576 | G | 0.00970 |
| rs17492224 | 1 | 107115601 | G | 0.00486 |
| rs4430358  | 1 | 107564907 | C | 0.01142 |
| rs11577034 | 1 | 107733070 | A | 0.00021 |
| rs4914953  | 1 | 107985947 | G | 0.00532 |
| rs6583040  | 1 | 108011685 | A | 0.00503 |
| rs6696531  | 1 | 108291231 | A | 0.00430 |
| rs695030   | 1 | 108444334 | A | 0.00483 |

|            |   |           |   |         |
|------------|---|-----------|---|---------|
| rs11185282 | 1 | 108483005 | A | 0.00018 |
| rs9440550  | 1 | 109194424 | G | 0.00282 |
| rs17014528 | 1 | 109539325 | A | 0.00509 |
| rs6663547  | 1 | 109915752 | C | 0.00384 |
| rs6695237  | 1 | 110217149 | G | 0.00377 |
| rs12036949 | 1 | 110217322 | G | 0.01424 |
| rs7522621  | 1 | 110218390 | G | 0.01320 |
| rs7367132  | 1 | 110230637 | G | 0.00056 |
| rs4838929  | 1 | 110502060 | G | 0.00848 |
| rs3849180  | 1 | 110621941 | T | 0.00629 |
| rs7554231  | 1 | 110872283 | G | 0.01327 |
| rs17631306 | 1 | 110873845 | G | 0.00873 |
| rs7522527  | 1 | 110903190 | A | 0.00022 |
| rs11102162 | 1 | 111133718 | G | 0.01259 |
| rs1043096  | 1 | 111483830 | G | 0.00324 |
| rs623775   | 1 | 111549651 | A | 0.01114 |
| rs3934922  | 1 | 111586917 | G | 0.01034 |
| rs10857870 | 1 | 111630743 | C | 0.00673 |
| rs4839127  | 1 | 111707682 | C | 0.01644 |
| rs1264913  | 1 | 111776458 | G | 0.01604 |
| rs10857892 | 1 | 111864525 | T | 0.01221 |
| rs2477425  | 1 | 111954125 | G | 0.01269 |
| rs1324889  | 1 | 111985163 | G | 0.01266 |
| rs4839171  | 1 | 112170877 | T | 0.01116 |
| rs12129789 | 1 | 112180549 | T | 0.01171 |
| rs4839202  | 1 | 112388477 | G | 0.01620 |
| rs269080   | 1 | 112399680 | A | 0.00144 |
| rs17740750 | 1 | 112405977 | T | 0.01599 |
| rs370258   | 1 | 112410575 | T | 0.01666 |
| rs7531453  | 1 | 112427091 | G | 0.01638 |
| rs269097   | 1 | 112436461 | A | 0.01381 |
| rs1992509  | 1 | 112524987 | G | 0.00854 |
| rs1416203  | 1 | 112563816 | A | 0.00464 |
| rs2998359  | 1 | 112582141 | G | 0.01137 |
| rs1371690  | 1 | 112583351 | G | 0.00166 |
| rs12097373 | 1 | 113187470 | T | 0.00859 |
| rs17013326 | 1 | 113890839 | T | 0.01124 |
| rs1217226  | 1 | 113941445 | G | 0.00844 |
| rs1230649  | 1 | 114045700 | C | 0.01113 |
| rs41534747 | 1 | 114088209 | G | 0.00664 |
| rs1217396  | 1 | 114139759 | G | 0.01237 |
| rs2488457  | 1 | 114216891 | C | 0.01422 |
| rs1065634  | 1 | 115061291 | T | 0.01501 |
| rs2798659  | 1 | 115157486 | C | 0.00720 |

|            |   |           |   |         |
|------------|---|-----------|---|---------|
| rs6537850  | 1 | 115403642 | A | 0.00047 |
| rs10858063 | 1 | 115407659 | T | 0.00312 |
| rs10218480 | 1 | 115468201 | C | 0.00488 |
| rs10924103 | 1 | 116838074 | G | 0.01382 |
| rs497573   | 1 | 117073135 | G | 0.00888 |
| rs2306444  | 1 | 117786299 | T | 0.00181 |
| rs10923312 | 1 | 117819157 | A | 0.00359 |
| rs12116827 | 1 | 118234461 | G | 0.00289 |
| rs2208375  | 1 | 118269162 | G | 0.00133 |
| rs12035880 | 1 | 119008658 | C | 0.01576 |
| rs10923714 | 1 | 119314436 | C | 0.00681 |
| rs947433   | 1 | 119562561 | T | 0.00531 |
| rs838528   | 1 | 119700558 | T | 0.00615 |
| rs1417610  | 1 | 119779284 | T | 0.00727 |
| rs4659177  | 1 | 119804451 | T | 0.00839 |
| rs539799   | 1 | 120009995 | C | 0.00527 |
| rs17024521 | 1 | 120268277 | G | 0.01162 |
| rs4388643  | 1 | 144338416 | G | 0.00541 |
| rs6668865  | 1 | 145134659 | A | 0.01310 |
| rs2354432  | 1 | 145159853 | T | 0.00601 |
| rs10900336 | 1 | 145241823 | A | 0.01056 |
| rs11589438 | 1 | 145382914 | A | 0.00580 |
| rs688325   | 1 | 145543907 | A | 0.00912 |
| rs3820129  | 1 | 145558596 | A | 0.00932 |
| rs2298161  | 1 | 148504248 | A | 0.00323 |
| rs12403255 | 1 | 148927036 | C | 0.01548 |
| rs11204774 | 1 | 149329581 | T | 0.00244 |
| rs6704126  | 1 | 149637929 | A | 0.01052 |
| rs12751531 | 1 | 149678259 | C | 0.00395 |
| rs10736380 | 1 | 149695229 | C | 0.00973 |
| rs3811417  | 1 | 150071531 | T | 0.00303 |
| rs12123975 | 1 | 150271428 | A | 0.00609 |
| rs7518654  | 1 | 150784469 | C | 0.00239 |
| rs877656   | 1 | 151045441 | A | 0.01164 |
| rs11205174 | 1 | 151267854 | C | 0.01332 |
| rs10888528 | 1 | 151317140 | A | 0.00415 |
| rs2288990  | 1 | 151584632 | C | 0.01599 |
| rs6696089  | 1 | 152599494 | T | 0.01113 |
| rs6694817  | 1 | 152668596 | G | 0.00418 |
| rs7556449  | 1 | 152772510 | C | 0.01201 |
| rs3766922  | 1 | 152843679 | C | 0.00786 |
| rs1131820  | 1 | 153011476 | C | 0.00430 |
| rs11264275 | 1 | 153091894 | T | 0.00448 |
| rs10908448 | 1 | 153149168 | G | 0.01240 |

|            |   |           |   |         |
|------------|---|-----------|---|---------|
| rs4845690  | 1 | 153153441 | T | 0.00298 |
| rs4661081  | 1 | 155290916 | G | 0.00302 |
| rs4661138  | 1 | 155609183 | A | 0.00905 |
| rs7549840  | 1 | 155639620 | C | 0.00715 |
| rs12755544 | 1 | 155819641 | T | 0.00382 |
| rs12129250 | 1 | 156049275 | A | 0.01361 |
| rs2765501  | 1 | 156071272 | T | 0.01503 |
| rs7530662  | 1 | 156433933 | G | 0.01008 |
| rs393304   | 1 | 156451439 | C | 0.00615 |
| rs12405213 | 1 | 156632321 | T | 0.01054 |
| rs11578937 | 1 | 156642230 | A | 0.00602 |
| rs16840385 | 1 | 156845314 | G | 0.00543 |
| rs12568794 | 1 | 157112723 | A | 0.00595 |
| rs3768513  | 1 | 157278841 | A | 0.01485 |
| rs11804578 | 1 | 157833723 | T | 0.00237 |
| rs4131568  | 1 | 157988680 | A | 0.00978 |
| rs4551590  | 1 | 158007641 | C | 0.00578 |
| rs4656869  | 1 | 158254744 | A | 0.00239 |
| rs11265354 | 1 | 158438808 | G | 0.00568 |
| rs12016623 | 1 | 158731640 | C | 0.00150 |
| rs7410867  | 1 | 159099423 | C | 0.00458 |
| rs11587040 | 1 | 159166407 | A | 0.00441 |
| rs12738660 | 1 | 159622258 | C | 0.00672 |
| rs4657130  | 1 | 160230231 | A | 0.00496 |
| rs12567211 | 1 | 160303147 | A | 0.00915 |
| rs4657171  | 1 | 160445222 | C | 0.01397 |
| rs12064639 | 1 | 160452056 | C | 0.00988 |
| rs2661810  | 1 | 160543056 | T | 0.01394 |
| rs469726   | 1 | 160683731 | A | 0.00024 |
| rs2806423  | 1 | 160978613 | T | 0.01396 |
| rs10917693 | 1 | 161412288 | C | 0.00695 |
| rs10799928 | 1 | 161761408 | A | 0.00127 |
| rs17386462 | 1 | 162853299 | T | 0.00816 |
| rs4657374  | 1 | 163027242 | A | 0.01632 |
| rs1573181  | 1 | 163225463 | A | 0.00337 |
| rs1123821  | 1 | 163584942 | G | 0.00608 |
| rs2194899  | 1 | 163677409 | T | 0.00270 |
| rs3753898  | 1 | 163682875 | G | 0.00699 |
| rs17415428 | 1 | 163771676 | G | 0.00443 |
| rs9333413  | 1 | 163875924 | A | 0.00581 |
| rs10918239 | 1 | 163911489 | C | 0.00119 |
| rs10918318 | 1 | 164181845 | G | 0.00190 |
| rs6661072  | 1 | 164224644 | C | 0.01198 |
| rs11579987 | 1 | 165155988 | C | 0.00370 |

|            |   |           |   |         |
|------------|---|-----------|---|---------|
| rs34925982 | 1 | 165206365 | A | 0.00619 |
| rs7545911  | 1 | 165214305 | T | 0.01579 |
| rs6682062  | 1 | 165216603 | C | 0.01282 |
| rs6688613  | 1 | 165218493 | A | 0.01013 |
| rs1327866  | 1 | 165219534 | C | 0.00487 |
| rs1119091  | 1 | 165236639 | T | 0.01114 |
| rs12133491 | 1 | 165323807 | G | 0.01329 |
| rs10127714 | 1 | 165333233 | C | 0.00597 |
| rs7412201  | 1 | 165356012 | T | 0.01116 |
| rs12143783 | 1 | 165389053 | A | 0.01216 |
| rs6427082  | 1 | 165562462 | A | 0.01214 |
| rs10918683 | 1 | 165568622 | T | 2.84700 |
| rs932396   | 1 | 165775578 | C | 0.00570 |
| rs7543683  | 1 | 165808961 | A | 0.00240 |
| rs16859595 | 1 | 165999608 | A | 0.01393 |
| rs12059815 | 1 | 166746344 | G | 0.00044 |
| rs7524938  | 1 | 167079363 | G | 0.00142 |
| rs6688139  | 1 | 167457279 | C | 0.01663 |
| rs6703463  | 1 | 167466049 | T | 0.01175 |
| rs1856303  | 1 | 167547862 | T | 0.00806 |
| rs4656724  | 1 | 168088112 | G | 0.01540 |
| rs12048441 | 1 | 168433735 | G | 0.00563 |
| rs926440   | 1 | 169100968 | T | 0.00611 |
| rs6681815  | 1 | 169161546 | A | 0.00279 |
| rs7534557  | 1 | 169766778 | T | 0.01183 |
| rs7537770  | 1 | 170046962 | T | 0.00662 |
| rs16843588 | 1 | 170176191 | C | 0.00102 |
| rs41516352 | 1 | 170459926 | C | 0.01616 |
| rs12411264 | 1 | 170460291 | G | 0.00051 |
| rs4072117  | 1 | 170475494 | T | 0.01067 |
| rs2213736  | 1 | 170731120 | T | 0.01243 |
| rs10458360 | 1 | 170900598 | C | 0.00038 |
| rs10798178 | 1 | 170943797 | A | 0.00854 |
| rs859627   | 1 | 170995569 | C | 0.00171 |
| rs4554754  | 1 | 171652096 | C | 0.01035 |
| rs4294450  | 1 | 171656263 | C | 0.00118 |
| rs10489323 | 1 | 173557189 | G | 0.00936 |
| rs10912957 | 1 | 173562004 | T | 0.00614 |
| rs10489322 | 1 | 173565216 | A | 0.00045 |
| rs11585085 | 1 | 173596626 | A | 0.00391 |
| rs4570382  | 1 | 173818063 | A | 0.01111 |
| rs12065732 | 1 | 173833340 | A | 0.00779 |
| rs12030347 | 1 | 173854154 | G | 0.00564 |
| rs6425357  | 1 | 174004791 | A | 0.01644 |



|            |   |           |   |         |
|------------|---|-----------|---|---------|
| rs7544599  | 1 | 174017463 | G | 0.00600 |
| rs2030558  | 1 | 174156250 | T | 0.00027 |
| rs7547111  | 1 | 174166516 | G | 0.01342 |
| rs2502827  | 1 | 174310840 | A | 0.00782 |
| rs2206503  | 1 | 174720725 | G | 0.00635 |
| rs2206511  | 1 | 174784152 | C | 0.00819 |
| rs6676686  | 1 | 175024712 | T | 0.01100 |
| rs11587780 | 1 | 175154068 | A | 0.01608 |
| rs4652245  | 1 | 175569595 | G | 0.01194 |
| rs4140633  | 1 | 175571563 | A | 0.00787 |
| rs3946142  | 1 | 175572481 | G | 0.00953 |
| rs6658794  | 1 | 175580821 | G | 0.01659 |
| rs1359939  | 1 | 176087484 | A | 0.01196 |
| rs869286   | 1 | 176210435 | C | 0.00240 |
| rs16852381 | 1 | 176269629 | C | 0.01319 |
| rs2492279  | 1 | 176820103 | A | 0.00089 |
| rs10798652 | 1 | 177328050 | A | 0.00053 |
| rs6674086  | 1 | 177726177 | G | 0.00986 |
| rs6674274  | 1 | 177726299 | C | 0.01165 |
| rs964983   | 1 | 177763642 | C | 0.01072 |
| rs11577538 | 1 | 177784337 | G | 0.01044 |
| rs1887816  | 1 | 177814890 | A | 0.01054 |
| rs1887814  | 1 | 177818275 | C | 0.00212 |
| rs4652420  | 1 | 177828766 | C | 0.00387 |
| rs4652424  | 1 | 177835711 | C | 0.00257 |
| rs10913878 | 1 | 177991215 | C | 0.00639 |
| rs1148819  | 1 | 178069001 | T | 0.01453 |
| rs16855014 | 1 | 178192161 | G | 0.01102 |
| rs2331739  | 1 | 178762293 | A | 0.01420 |
| rs7548318  | 1 | 178971588 | C | 0.01115 |
| rs2331886  | 1 | 178999746 | A | 0.00643 |
| rs17302632 | 1 | 179306151 | T | 0.00798 |
| rs10752856 | 1 | 179655715 | C | 0.01178 |
| rs4651109  | 1 | 179836514 | G | 0.01595 |
| rs199940   | 1 | 179863063 | T | 0.01604 |
| rs3856108  | 1 | 180322669 | T | 0.00690 |
| rs10494545 | 1 | 180467282 | G | 0.00893 |
| rs1936535  | 1 | 180492182 | T | 0.00747 |
| rs12409524 | 1 | 180891881 | G | 0.01500 |
| rs4549998  | 1 | 181562553 | G | 0.00921 |
| rs16861243 | 1 | 181856005 | A | 0.00763 |
| rs9633306  | 1 | 181904975 | T | 0.01632 |
| rs12088165 | 1 | 181924722 | T | 0.01069 |
| rs10911480 | 1 | 182221005 | G | 0.00004 |

|            |   |           |   |         |
|------------|---|-----------|---|---------|
| rs41470944 | 1 | 182668852 | G | 0.00192 |
| rs10911702 | 1 | 183539217 | G | 0.00917 |
| rs41453048 | 1 | 183796340 | G | 0.01401 |
| rs12408916 | 1 | 184448269 | C | 0.01463 |
| rs2383529  | 1 | 184935715 | G | 0.00586 |
| rs6690278  | 1 | 185212633 | T | 0.01429 |
| rs10489410 | 1 | 185220818 | C | 0.01166 |
| rs10911991 | 1 | 185301683 | T | 0.00211 |
| rs17545182 | 1 | 185321946 | A | 0.01656 |
| rs964665   | 1 | 185476575 | G | 0.01024 |
| rs12740330 | 1 | 185647575 | C | 0.00370 |
| rs12137534 | 1 | 185694854 | G | 0.00445 |
| rs673503   | 1 | 186290345 | T | 0.00835 |
| rs4651467  | 1 | 186823646 | A | 0.00947 |
| rs10921118 | 1 | 187265926 | T | 0.00977 |
| rs1342554  | 1 | 187447701 | G | 0.01014 |
| rs499557   | 1 | 187885135 | G | 0.01235 |
| rs494978   | 1 | 187927195 | C | 0.01487 |
| rs4845222  | 1 | 188264362 | A | 0.00178 |
| rs10800939 | 1 | 188508873 | A | 0.01471 |
| rs505600   | 1 | 188547582 | A | 0.01543 |
| rs814953   | 1 | 188789599 | G | 0.01348 |
| rs1325220  | 1 | 188929461 | T | 0.00132 |
| rs7512722  | 1 | 188997417 | T | 0.00010 |
| rs491821   | 1 | 189036927 | C | 0.00574 |
| rs10920829 | 1 | 189124494 | C | 0.00999 |
| rs7519532  | 1 | 189643292 | C | 0.00549 |
| rs648685   | 1 | 189695352 | G | 0.01448 |
| rs16834097 | 1 | 190404481 | C | 0.00562 |
| rs10921369 | 1 | 191742454 | A | 0.01466 |
| rs7541624  | 1 | 191920912 | T | 0.01096 |
| rs1416599  | 1 | 191930411 | C | 0.00405 |
| rs16835692 | 1 | 191934519 | T | 0.01292 |
| rs12024767 | 1 | 191944757 | C | 0.00922 |
| rs16835697 | 1 | 191949253 | C | 0.01497 |
| rs17376854 | 1 | 191951351 | C | 0.00462 |
| rs7527158  | 1 | 191967952 | A | 0.00551 |
| rs6673280  | 1 | 191968573 | A | 0.00934 |
| rs41516151 | 1 | 192021429 | C | 0.01604 |
| rs1326859  | 1 | 192070515 | C | 0.00369 |
| rs16836246 | 1 | 192328689 | G | 0.00190 |
| rs10754101 | 1 | 192631743 | A | 0.01230 |
| rs4512625  | 1 | 192687297 | T | 0.00479 |
| rs4557953  | 1 | 192979872 | G | 0.00360 |

|            |   |           |   |         |
|------------|---|-----------|---|---------|
| rs4657943  | 1 | 193112639 | T | 0.00738 |
| rs591575   | 1 | 193431315 | A | 0.01494 |
| rs17661321 | 1 | 193528686 | A | 0.00696 |
| rs3010143  | 1 | 194126300 | A | 0.00429 |
| rs3008578  | 1 | 194131227 | T | 0.01046 |
| rs3010149  | 1 | 194139079 | A | 0.01509 |
| rs1451920  | 1 | 194141413 | T | 0.00086 |
| rs3010151  | 1 | 194142828 | G | 0.00297 |
| rs12135790 | 1 | 196345982 | T | 0.00669 |
| rs957388   | 1 | 196569260 | C | 0.01040 |
| rs1080976  | 1 | 196812175 | C | 0.00690 |
| rs1322916  | 1 | 197142881 | C | 0.00288 |
| rs12048004 | 1 | 197181925 | A | 0.00127 |
| rs2154328  | 1 | 197209638 | G | 0.00596 |
| rs2648772  | 1 | 197381370 | C | 0.01308 |
| rs2737631  | 1 | 198408800 | T | 0.00789 |
| rs4551624  | 1 | 198418447 | T | 0.00295 |
| rs404339   | 1 | 199153514 | G | 0.01646 |
| rs11579874 | 1 | 199186985 | A | 0.01188 |
| rs3767511  | 1 | 199318822 | G | 0.01382 |
| rs8158     | 1 | 199379604 | C | 0.00042 |
| rs6664337  | 1 | 199383377 | T | 0.00588 |
| rs4915220  | 1 | 199431866 | A | 0.00266 |
| rs12466    | 1 | 199464431 | T | 0.00670 |
| rs16848229 | 1 | 199523996 | C | 0.00184 |
| rs2268156  | 1 | 199533697 | G | 0.00610 |
| rs6427908  | 1 | 199695708 | C | 0.01091 |
| rs7527761  | 1 | 199726875 | G | 0.01098 |
| rs2068824  | 1 | 199861288 | C | 0.01205 |
| rs870094   | 1 | 201222859 | A | 0.00971 |
| rs2486928  | 1 | 201505191 | T | 0.01377 |
| rs10920623 | 1 | 201618684 | G | 0.00199 |
| rs11571093 | 1 | 202390294 | C | 0.01150 |
| rs10900555 | 1 | 202398933 | G | 0.00389 |
| rs16853059 | 1 | 202406807 | G | 0.01227 |
| rs10900558 | 1 | 202416146 | C | 0.01357 |
| rs4951315  | 1 | 202423791 | A | 0.01578 |
| rs7538038  | 1 | 202427649 | C | 0.01369 |
| rs12097666 | 1 | 202428835 | G | 0.01433 |
| rs6702751  | 1 | 202478416 | G | 0.01529 |
| rs7522769  | 1 | 202559307 | G | 0.00005 |
| rs2942133  | 1 | 202636498 | A | 0.00874 |
| rs1980050  | 1 | 202713311 | T | 0.00250 |
| rs4252675  | 1 | 202761199 | C | 0.00387 |

|            |   |           |   |         |
|------------|---|-----------|---|---------|
| rs7541449  | 1 | 202844931 | T | 0.01183 |
| rs2772227  | 1 | 202882023 | T | 0.01366 |
| rs2802809  | 1 | 203236209 | A | 0.01102 |
| rs11579937 | 1 | 203874755 | A | 0.01268 |
| rs11581303 | 1 | 203874776 | C | 0.00900 |
| rs1620334  | 1 | 203964468 | C | 0.01481 |
| rs823122   | 1 | 203991651 | C | 0.00232 |
| rs10494876 | 1 | 204676741 | T | 0.01589 |
| rs7546842  | 1 | 204697344 | G | 0.00069 |
| rs2243173  | 1 | 205078081 | A | 0.00879 |
| rs8942     | 1 | 205336542 | A | 0.00718 |
| rs1410408  | 1 | 205732931 | T | 0.00573 |
| rs11803956 | 1 | 205869644 | T | 0.00433 |
| rs2235766  | 1 | 206128153 | C | 0.00212 |
| rs11579772 | 1 | 206194996 | G | 0.00216 |
| rs6673084  | 1 | 206310662 | A | 0.00088 |
| rs1537696  | 1 | 206514383 | T | 0.00878 |
| rs17012531 | 1 | 206676822 | T | 0.01456 |
| rs3753606  | 1 | 208003835 | C | 0.01207 |
| rs12022221 | 1 | 208112801 | C | 0.00159 |
| rs182743   | 1 | 208237538 | A | 0.01476 |
| rs7543650  | 1 | 208237598 | T | 0.01597 |
| rs2451696  | 1 | 208348969 | C | 0.00624 |
| rs2485892  | 1 | 208414613 | A | 0.01173 |
| rs2357585  | 1 | 208651251 | T | 0.00787 |
| rs34549224 | 1 | 208687402 | A | 0.00150 |
| rs1135317  | 1 | 208924080 | C | 0.00865 |
| rs924569   | 1 | 209146241 | T | 0.01135 |
| rs1697621  | 1 | 209147804 | C | 0.00078 |
| rs1875438  | 1 | 209156230 | C | 0.00721 |
| rs10863911 | 1 | 209753483 | T | 0.00617 |
| rs4287239  | 1 | 209753674 | A | 0.00070 |
| rs1507357  | 1 | 210992052 | A | 0.00735 |
| rs6687672  | 1 | 211011500 | G | 0.01365 |
| rs6694190  | 1 | 211071635 | T | 0.01291 |
| rs870547   | 1 | 211159262 | C | 0.01140 |
| rs6679848  | 1 | 211159608 | T | 0.01662 |
| rs6679938  | 1 | 211159656 | T | 0.01631 |
| rs6656232  | 1 | 211162146 | C | 0.01643 |
| rs41469046 | 1 | 212019494 | G | 0.01019 |
| rs1472441  | 1 | 212593875 | A | 0.01603 |
| rs12563397 | 1 | 212822747 | C | 0.00658 |
| rs11120376 | 1 | 212931689 | A | 0.01369 |
| rs6667184  | 1 | 213202375 | G | 0.01579 |

|            |   |           |   |         |
|------------|---|-----------|---|---------|
| rs562410   | 1 | 213205803 | G | 0.01339 |
| rs1452623  | 1 | 213231930 | G | 0.00778 |
| rs1377173  | 1 | 213265201 | A | 0.01441 |
| rs4375232  | 1 | 213337026 | T | 0.01658 |
| rs12753507 | 1 | 213446975 | G | 0.00960 |
| rs946489   | 1 | 213482243 | G | 0.01104 |
| rs10864169 | 1 | 213484064 | A | 0.00252 |
| rs4655397  | 1 | 213484176 | C | 0.01081 |
| rs41450145 | 1 | 213537855 | C | 0.00309 |
| rs10494999 | 1 | 213562762 | T | 0.00898 |
| rs1319603  | 1 | 213698123 | C | 0.00702 |
| rs17024993 | 1 | 213863644 | A | 0.00241 |
| rs6665928  | 1 | 213888054 | T | 0.01594 |
| rs2797260  | 1 | 213971280 | A | 0.00938 |
| rs17025421 | 1 | 214025279 | A | 0.00943 |
| rs2764951  | 1 | 214173592 | G | 0.00646 |
| rs503150   | 1 | 214181449 | G | 0.00074 |
| rs654702   | 1 | 214184195 | T | 0.01582 |
| rs531780   | 1 | 214184463 | T | 0.01536 |
| rs7541086  | 1 | 214242873 | A | 0.00293 |
| rs11117633 | 1 | 214859942 | T | 0.01186 |
| rs12023399 | 1 | 214886050 | G | 0.00997 |
| rs946472   | 1 | 215009637 | G | 0.00653 |
| rs12029460 | 1 | 215131484 | T | 0.01174 |
| rs1166338  | 1 | 215360953 | C | 0.00831 |
| rs10863311 | 1 | 215464806 | A | 0.00642 |
| rs17653435 | 1 | 215499147 | C | 0.00165 |
| rs10495053 | 1 | 215538967 | G | 0.00476 |
| rs2998901  | 1 | 215723760 | T | 0.00474 |
| rs4634972  | 1 | 216189142 | C | 3.95900 |
| rs17047350 | 1 | 216319175 | A | 0.00573 |
| rs10157529 | 1 | 216330493 | C | 0.01520 |
| rs259478   | 1 | 216811787 | A | 0.00497 |
| rs259474   | 1 | 216826606 | T | 0.00668 |
| rs17048238 | 1 | 216828304 | G | 0.01423 |
| rs4846281  | 1 | 217079925 | T | 0.00109 |
| rs653734   | 1 | 217087235 | C | 0.00450 |
| rs17515844 | 1 | 217114604 | C | 0.00222 |
| rs1598472  | 1 | 217638142 | G | 0.00361 |
| rs2791561  | 1 | 217658032 | C | 0.00480 |
| rs2050802  | 1 | 217714276 | C | 0.00106 |
| rs1776049  | 1 | 218109946 | C | 0.00303 |
| rs2647438  | 1 | 218218874 | T | 0.00199 |
| rs11118490 | 1 | 218276896 | T | 0.00462 |

|            |   |           |   |         |
|------------|---|-----------|---|---------|
| rs3767324  | 1 | 219021256 | A | 0.00698 |
| rs11118609 | 1 | 219055113 | C | 0.00440 |
| rs1993629  | 1 | 219644632 | A | 0.01553 |
| rs17010134 | 1 | 219724431 | T | 0.01055 |
| rs12126069 | 1 | 219947474 | G | 0.00401 |
| rs11118868 | 1 | 220052795 | A | 0.00320 |
| rs4846728  | 1 | 220070531 | T | 0.00038 |
| rs10863665 | 1 | 220099305 | A | 0.01075 |
| rs17011200 | 1 | 220258128 | G | 0.00230 |
| rs4846376  | 1 | 220774015 | C | 0.00167 |
| rs3008613  | 1 | 220862392 | A | 0.01347 |
| rs2926160  | 1 | 221222837 | G | 0.00565 |
| rs1640827  | 1 | 221378230 | A | 0.00338 |
| rs4140967  | 1 | 221418246 | C | 0.00837 |
| rs4653859  | 1 | 221933917 | C | 0.00189 |
| rs17557525 | 1 | 221973921 | G | 0.01284 |
| rs12088254 | 1 | 222033974 | G | 0.00862 |
| rs6678365  | 1 | 222090357 | C | 0.00641 |
| rs3738367  | 1 | 222775211 | A | 0.01450 |
| rs1603918  | 1 | 222894120 | T | 0.00959 |
| rs7535296  | 1 | 222897964 | A | 0.01273 |
| rs1436171  | 1 | 222948451 | G | 0.01267 |
| rs2897161  | 1 | 222952691 | T | 0.00915 |
| rs10915699 | 1 | 222957663 | T | 0.00807 |
| rs3012182  | 1 | 223018782 | C | 0.01430 |
| rs16845030 | 1 | 223794151 | C | 0.00183 |
| rs10915872 | 1 | 224016006 | G | 0.00188 |
| rs3738043  | 1 | 224081922 | C | 0.00877 |
| rs2377027  | 1 | 224487159 | G | 0.00472 |
| rs10915975 | 1 | 224587815 | G | 0.01648 |
| rs7524430  | 1 | 224760165 | C | 0.00572 |
| rs522398   | 1 | 224838375 | G | 0.00565 |
| rs1144835  | 1 | 224901837 | T | 0.01043 |
| rs3768393  | 1 | 224947472 | T | 0.01535 |
| rs7539151  | 1 | 225908366 | C | 0.00081 |
| rs1629294  | 1 | 226482124 | G | 0.00759 |
| rs2776856  | 1 | 226490418 | G | 0.01019 |
| rs1757139  | 1 | 226491223 | G | 0.00946 |
| rs533738   | 1 | 226525596 | T | 0.00553 |
| rs7511681  | 1 | 226717483 | T | 0.00095 |
| rs17353018 | 1 | 227010426 | G | 0.00270 |
| rs7517398  | 1 | 227235445 | G | 0.00904 |
| rs545321   | 1 | 227281341 | A | 0.00490 |
| rs1358769  | 1 | 228279107 | A | 0.00983 |

|            |   |           |   |          |
|------------|---|-----------|---|----------|
| rs7520640  | 1 | 228295603 | G | 10.23700 |
| rs12751815 | 1 | 228309203 | G | 0.00644  |
| rs7531145  | 1 | 228506644 | G | 0.01562  |
| rs9431872  | 1 | 229085564 | G | 0.00837  |
| rs9431649  | 1 | 229345408 | G | 0.00725  |
| rs17817356 | 1 | 229986844 | T | 0.00268  |
| rs9803690  | 1 | 229989968 | T | 0.01130  |
| rs4658972  | 1 | 230194387 | C | 0.01447  |
| rs12406771 | 1 | 230195957 | A | 0.01374  |
| rs914272   | 1 | 230384738 | G | 0.00330  |
| rs9727541  | 1 | 230481054 | G | 0.00560  |
| rs12117428 | 1 | 230684634 | C | 0.01186  |
| rs1409370  | 1 | 230686695 | T | 0.00570  |
| rs12403846 | 1 | 231099306 | A | 0.00001  |
| rs4649417  | 1 | 231140152 | T | 0.00064  |
| rs732169   | 1 | 231211946 | C | 0.01456  |
| rs6424263  | 1 | 231216893 | C | 0.00486  |
| rs3766484  | 1 | 231218775 | C | 0.00226  |
| rs10797601 | 1 | 231311499 | G | 0.01488  |
| rs1294324  | 1 | 231495450 | G | 0.00215  |
| rs12740439 | 1 | 231762017 | T | 0.00980  |
| rs10737200 | 1 | 232168019 | C | 0.00385  |
| rs521127   | 1 | 232419431 | C | 0.01567  |
| rs480993   | 1 | 232515592 | G | 0.01280  |
| rs2273875  | 1 | 232639980 | C | 0.00455  |
| rs6658741  | 1 | 232780134 | T | 0.00200  |
| rs7541554  | 1 | 232829888 | A | 0.00339  |
| rs16832468 | 1 | 233440669 | T | 0.01376  |
| rs17543709 | 1 | 233631547 | T | 0.00413  |
| rs4659838  | 1 | 233631938 | G | 0.00957  |
| rs2463198  | 1 | 234599870 | T | 0.00233  |
| rs12411280 | 1 | 234907042 | T | 0.00308  |
| rs2385494  | 1 | 234970414 | T | 0.00942  |
| rs1252112  | 1 | 235181175 | A | 0.00820  |
| rs41414451 | 1 | 235259959 | G | 0.00607  |
| rs2490385  | 1 | 235349594 | T | 0.00617  |
| rs10925451 | 1 | 235769332 | C | 0.00544  |
| rs2061840  | 1 | 235790967 | G | 0.00111  |
| rs3820572  | 1 | 235832280 | A | 0.00846  |
| rs790892   | 1 | 236083873 | C | 0.01178  |
| rs2298100  | 1 | 236114948 | C | 0.01033  |
| rs7553937  | 1 | 236422804 | T | 0.00860  |
| rs11807567 | 1 | 236751830 | C | 0.00197  |
| rs10802704 | 1 | 236766283 | G | 0.00111  |

|            |   |           |   |         |
|------------|---|-----------|---|---------|
| rs10925714 | 1 | 236850019 | C | 0.01533 |
| rs16838201 | 1 | 237535179 | A | 0.01432 |
| rs10925884 | 1 | 237659157 | G | 0.00758 |
| rs10802776 | 1 | 237816943 | T | 0.00236 |
| rs997538   | 1 | 237823815 | G | 0.00335 |
| rs10754690 | 1 | 238294812 | C | 0.01021 |
| rs10495460 | 1 | 238417864 | G | 0.00904 |
| rs16840310 | 1 | 238760786 | A | 0.01225 |
| rs527754   | 1 | 239262629 | G | 0.01174 |
| rs11577475 | 1 | 239288760 | A | 0.00289 |
| rs4400595  | 1 | 239442770 | T | 0.01235 |
| rs4659598  | 1 | 239557424 | T | 0.00811 |
| rs7512603  | 1 | 239561201 | T | 0.00614 |
| rs9428505  | 1 | 239640170 | A | 0.01348 |
| rs10802963 | 1 | 239640279 | A | 0.01334 |
| rs4660095  | 1 | 239706677 | A | 0.00169 |
| rs12737686 | 1 | 239951352 | T | 0.01322 |
| rs12564134 | 1 | 240075450 | C | 0.00258 |
| rs2580238  | 1 | 240628728 | T | 0.01007 |
| rs2809985  | 1 | 240629344 | G | 0.01028 |
| rs10926758 | 1 | 240741355 | T | 0.01205 |
| rs1931054  | 1 | 240936508 | T | 0.00475 |
| rs2027047  | 1 | 240977688 | T | 0.00308 |
| rs7551067  | 1 | 241673202 | A | 0.01652 |
| rs10927025 | 1 | 241705841 | A | 0.00085 |
| rs2994339  | 1 | 241708043 | G | 0.01416 |
| rs4658574  | 1 | 241717339 | G | 0.00828 |
| rs484459   | 1 | 242190014 | C | 0.01149 |
| rs1000451  | 1 | 242254470 | G | 0.01180 |
| rs2500493  | 1 | 242320392 | G | 0.00171 |
| rs10927144 | 1 | 242376403 | C | 0.01142 |
| rs6429453  | 1 | 242423341 | T | 0.01450 |
| rs9659003  | 1 | 242477264 | A | 0.01141 |
| rs640753   | 1 | 242563962 | T | 0.01472 |
| rs658757   | 1 | 242566392 | G | 0.00094 |
| rs6429486  | 1 | 242813674 | C | 0.00189 |
| rs4658693  | 1 | 243305965 | A | 0.00326 |
| rs10924173 | 1 | 243557263 | T | 0.01575 |
| rs1538961  | 1 | 243893600 | C | 0.00332 |
| rs2817509  | 1 | 243991700 | C | 0.01454 |
| rs10802267 | 1 | 243996723 | C | 0.00850 |
| rs2362590  | 1 | 244087583 | G | 0.00994 |
| rs10924366 | 1 | 244094033 | G | 0.00672 |
| rs10924436 | 1 | 244225114 | G | 0.01462 |



|            |   |           |   |         |
|------------|---|-----------|---|---------|
| rs6686745  | 1 | 244348150 | G | 0.00438 |
| rs10924848 | 1 | 245059321 | G | 0.01645 |
| rs10924850 | 1 | 245059590 | G | 0.00301 |
| rs2255481  | 1 | 245263162 | G | 0.01341 |
| rs1954187  | 1 | 245591586 | C | 0.00041 |
| rs11802371 | 1 | 245609461 | G | 0.00802 |
| rs7555997  | 1 | 245613957 | A | 0.00419 |
| rs449725   | 2 | 192993    | G | 0.00121 |
| rs10167992 | 2 | 253270    | T | 0.00824 |
| rs4428039  | 2 | 912072    | A | 0.01528 |
| rs1567919  | 2 | 1411021   | T | 0.00255 |
| rs12472901 | 2 | 1627839   | A | 0.00273 |
| rs13404264 | 2 | 1903673   | T | 0.00284 |
| rs1991773  | 2 | 1936483   | A | 0.00931 |
| rs17338428 | 2 | 2213121   | G | 0.00543 |
| rs13388296 | 2 | 2286611   | C | 0.00140 |
| rs10177243 | 2 | 2420158   | C | 0.00755 |
| rs4853940  | 2 | 2426972   | C | 0.01044 |
| rs4853937  | 2 | 2443758   | G | 0.00173 |
| rs6728339  | 2 | 2474739   | C | 0.00555 |
| rs17495118 | 2 | 2691627   | G | 0.01383 |
| rs9309697  | 2 | 2719909   | A | 0.00081 |
| rs6754030  | 2 | 3063957   | A | 0.00591 |
| rs7570482  | 2 | 3088347   | A | 0.00323 |
| rs2167967  | 2 | 3138767   | C | 0.01220 |
| rs4854187  | 2 | 3363203   | G | 0.00499 |
| rs9750132  | 2 | 3488694   | T | 0.00129 |
| rs17018595 | 2 | 4120296   | A | 0.00354 |
| rs12712003 | 2 | 4527222   | A | 0.00806 |
| rs7580991  | 2 | 4577070   | G | 0.00471 |
| rs1446146  | 2 | 4811449   | A | 0.00258 |
| rs10177436 | 2 | 4903505   | T | 0.00200 |
| rs41325248 | 2 | 5263872   | A | 0.01521 |
| rs7425362  | 2 | 5849348   | T | 0.00399 |
| rs10929889 | 2 | 5960645   | G | 0.01103 |
| rs2693822  | 2 | 6083374   | G | 0.00954 |
| rs1852317  | 2 | 6144872   | G | 0.00469 |
| rs16865015 | 2 | 6346425   | T | 0.01215 |
| rs4337447  | 2 | 6352038   | T | 0.00777 |
| rs12478619 | 2 | 6648243   | A | 0.01451 |
| rs6749132  | 2 | 6655887   | T | 0.01400 |
| rs4669090  | 2 | 6703172   | G | 0.00500 |
| rs6761066  | 2 | 6705721   | A | 0.00049 |
| rs7564462  | 2 | 6712276   | C | 0.00240 |

|            |   |          |   |         |
|------------|---|----------|---|---------|
| rs307972   | 2 | 6757301  | C | 0.00573 |
| rs182537   | 2 | 6775281  | G | 0.00365 |
| rs379656   | 2 | 6777986  | T | 0.01268 |
| rs1123341  | 2 | 6990174  | T | 0.00085 |
| rs3772018  | 2 | 7015216  | T | 0.01060 |
| rs771256   | 2 | 7032516  | C | 0.00158 |
| rs4669123  | 2 | 7033528  | A | 0.00614 |
| rs4669156  | 2 | 7268367  | A | 0.00671 |
| rs10205728 | 2 | 7333712  | T | 0.00044 |
| rs11682970 | 2 | 7394637  | T | 0.01053 |
| rs6721439  | 2 | 7532321  | C | 0.01335 |
| rs41434549 | 2 | 7808927  | C | 0.00485 |
| rs3097278  | 2 | 8393065  | A | 0.01451 |
| rs2655450  | 2 | 8488590  | T | 0.00821 |
| rs1966049  | 2 | 8503550  | C | 0.00227 |
| rs6735600  | 2 | 8514325  | A | 0.00993 |
| rs7581641  | 2 | 8543557  | T | 0.01331 |
| rs345905   | 2 | 8607709  | G | 0.00136 |
| rs10432404 | 2 | 8688612  | A | 0.00359 |
| rs11691910 | 2 | 8703783  | T | 0.01627 |
| rs4669321  | 2 | 8705870  | G | 0.00610 |
| rs2175334  | 2 | 9195063  | C | 0.00748 |
| rs11684747 | 2 | 9614622  | A | 0.01014 |
| rs12479251 | 2 | 9967149  | A | 0.01133 |
| rs17364189 | 2 | 9982242  | G | 0.01461 |
| rs6708630  | 2 | 10143258 | A | 0.00524 |
| rs6432097  | 2 | 10513029 | G | 0.00608 |
| rs2270308  | 2 | 10592822 | T | 0.01021 |
| rs2952626  | 2 | 10846228 | T | 0.00027 |
| rs1317768  | 2 | 10942071 | G | 0.00994 |
| rs4669647  | 2 | 10981799 | G | 0.00451 |
| rs10178469 | 2 | 11053254 | G | 0.01644 |
| rs11677588 | 2 | 11107300 | C | 0.00991 |
| rs7602665  | 2 | 11478414 | G | 0.01525 |
| rs6743597  | 2 | 11479223 | C | 0.01128 |
| rs6432193  | 2 | 11501448 | G | 0.00118 |
| rs12052681 | 2 | 11758552 | G | 0.01304 |
| rs13407481 | 2 | 11761158 | C | 0.01512 |
| rs2581084  | 2 | 11986833 | G | 0.01117 |
| rs17547925 | 2 | 12025884 | C | 0.01315 |
| rs1595808  | 2 | 12028711 | A | 0.01177 |
| rs10210269 | 2 | 12061486 | G | 0.01328 |
| rs10929783 | 2 | 12118548 | G | 0.00570 |
| rs11695912 | 2 | 12158473 | T | 0.00498 |

|            |   |          |   |          |
|------------|---|----------|---|----------|
| rs6720015  | 2 | 12188138 | A | 0.00699  |
| rs6728621  | 2 | 12190544 | A | 0.00585  |
| rs10929811 | 2 | 12512866 | T | 0.00540  |
| rs10164960 | 2 | 12882610 | A | 0.01336  |
| rs10929837 | 2 | 13012151 | T | 0.00675  |
| rs1588477  | 2 | 13809543 | G | 0.01245  |
| rs7577198  | 2 | 13853831 | G | 0.01607  |
| rs16861003 | 2 | 14002922 | C | 0.00773  |
| rs16861564 | 2 | 14358541 | T | 0.00912  |
| rs17344070 | 2 | 14405331 | T | 17.83400 |
| rs1976727  | 2 | 14475445 | C | 0.01572  |
| rs9287779  | 2 | 14536142 | C | 0.00217  |
| rs2571639  | 2 | 14660289 | C | 0.00231  |
| rs1607445  | 2 | 14898745 | G | 0.01046  |
| rs10185181 | 2 | 15111625 | T | 0.00993  |
| rs12466657 | 2 | 15111754 | A | 0.00068  |
| rs1430804  | 2 | 15112010 | T | 0.00345  |
| rs6734918  | 2 | 15322218 | G | 0.00152  |
| rs11904632 | 2 | 15323495 | C | 0.01252  |
| rs6431692  | 2 | 15395815 | G | 0.01204  |
| rs6723148  | 2 | 15509470 | T | 0.01651  |
| rs16862882 | 2 | 15726083 | G | 0.00476  |
| rs2254328  | 2 | 15948018 | A | 0.00765  |
| rs746104   | 2 | 15948478 | T | 0.00139  |
| rs4832592  | 2 | 16472596 | A | 0.00899  |
| rs6729772  | 2 | 16519793 | C | 0.00069  |
| rs12620192 | 2 | 16900801 | T | 0.00791  |
| rs12472889 | 2 | 17024563 | C | 0.01264  |
| rs7602480  | 2 | 17129381 | C | 0.00366  |
| rs1996609  | 2 | 17518083 | G | 0.00150  |
| rs300177   | 2 | 17817902 | C | 0.01279  |
| rs10176010 | 2 | 17901246 | T | 0.00041  |
| rs17317047 | 2 | 18198825 | C | 0.00228  |
| rs16984718 | 2 | 18372735 | T | 0.00383  |
| rs17752832 | 2 | 18667353 | G | 0.01590  |
| rs16985416 | 2 | 18729707 | A | 0.00403  |
| rs10856784 | 2 | 18998937 | G | 0.01150  |
| rs12991182 | 2 | 19537355 | G | 0.00546  |
| rs12472768 | 2 | 19765163 | G | 0.01097  |
| rs12464329 | 2 | 19825202 | G | 0.01204  |
| rs1466418  | 2 | 20138384 | T | 0.01336  |
| rs10178084 | 2 | 20138874 | G | 0.01239  |
| rs1032075  | 2 | 20454604 | C | 0.01586  |
| rs1531851  | 2 | 20557603 | T | 0.00191  |

|            |   |          |   |          |
|------------|---|----------|---|----------|
| rs7568542  | 2 | 20582722 | G | 0.01197  |
| rs921602   | 2 | 20670006 | T | 0.00077  |
| rs9306894  | 2 | 20741586 | G | 0.00064  |
| rs1595328  | 2 | 20772248 | A | 0.00048  |
| rs581998   | 2 | 21173986 | C | 0.01439  |
| rs11687710 | 2 | 21224573 | A | 0.00664  |
| rs527034   | 2 | 21236291 | A | 0.01550  |
| rs478442   | 2 | 21252721 | A | 0.01400  |
| rs11695136 | 2 | 21382741 | A | 0.01062  |
| rs432705   | 2 | 21435116 | T | 0.00695  |
| rs1022376  | 2 | 21920718 | G | 0.00051  |
| rs1996611  | 2 | 21970678 | T | 0.01529  |
| rs10495724 | 2 | 22074711 | T | 0.01136  |
| rs17043503 | 2 | 22271015 | A | 0.00297  |
| rs6743484  | 2 | 22407217 | A | 0.00666  |
| rs1396725  | 2 | 22466143 | G | 0.01347  |
| rs17044966 | 2 | 23312818 | C | 0.00781  |
| rs2577698  | 2 | 23449055 | A | 0.01609  |
| rs2954818  | 2 | 23449391 | G | 0.01574  |
| rs11125011 | 2 | 23464343 | T | 0.01566  |
| rs6742888  | 2 | 23469562 | T | 6.90500  |
| rs10169643 | 2 | 23564055 | C | 0.01021  |
| rs13384463 | 2 | 23600623 | T | 0.00485  |
| rs4497835  | 2 | 23613642 | T | 0.00536  |
| rs4665230  | 2 | 23659591 | A | 0.00457  |
| rs11125629 | 2 | 24586072 | A | 0.00758  |
| rs17046446 | 2 | 24735170 | A | 14.66000 |
| rs2119120  | 2 | 24767629 | C | 0.00385  |
| rs934609   | 2 | 24892380 | C | 0.01146  |
| rs41521945 | 2 | 25791581 | A | 0.00234  |
| rs6727974  | 2 | 26378143 | G | 0.01464  |
| rs1276123  | 2 | 26677750 | T | 0.01127  |
| rs1275985  | 2 | 26765249 | T | 0.01532  |
| rs1275986  | 2 | 26765583 | T | 0.01648  |
| rs1275537  | 2 | 27294806 | G | 0.00592  |
| rs7583698  | 2 | 27565912 | A | 0.00664  |
| rs4666014  | 2 | 27872679 | G | 0.00054  |
| rs1948922  | 2 | 28195657 | A | 0.01593  |
| rs13408504 | 2 | 28211838 | T | 0.00842  |
| rs11127133 | 2 | 28211983 | C | 0.01322  |
| rs7608642  | 2 | 28220753 | A | 0.01496  |
| rs3885975  | 2 | 29555940 | G | 0.01556  |
| rs10445907 | 2 | 29580732 | T | 0.01384  |
| rs10187657 | 2 | 29895721 | A | 0.00078  |

|            |   |          |   |         |
|------------|---|----------|---|---------|
| rs4473347  | 2 | 29928397 | A | 0.00323 |
| rs2363078  | 2 | 30733791 | A | 0.01254 |
| rs2609938  | 2 | 30758021 | T | 0.00069 |
| rs17010034 | 2 | 30785891 | C | 0.00410 |
| rs2593435  | 2 | 30811184 | G | 0.01405 |
| rs6548031  | 2 | 30838175 | A | 0.01397 |
| rs10193546 | 2 | 31168918 | A | 0.00320 |
| rs12620887 | 2 | 31241433 | T | 0.01511 |
| rs206817   | 2 | 31498796 | C | 0.00200 |
| rs10490358 | 2 | 31935601 | G | 0.00339 |
| rs17011711 | 2 | 32009898 | A | 0.00127 |
| rs1028600  | 2 | 32811691 | G | 0.01587 |
| rs4952312  | 2 | 32955412 | A | 0.01381 |
| rs7572753  | 2 | 33241044 | G | 0.01383 |
| rs41464348 | 2 | 33380803 | T | 0.00748 |
| rs2034693  | 2 | 33476810 | A | 0.00612 |
| rs17013337 | 2 | 33636585 | T | 0.00070 |
| rs897506   | 2 | 33640016 | A | 0.00814 |
| rs12465811 | 2 | 34477300 | G | 0.00414 |
| rs2063403  | 2 | 36082617 | C | 0.01175 |
| rs2020037  | 2 | 36127335 | G | 0.00184 |
| rs305163   | 2 | 36163166 | T | 0.00972 |
| rs11674150 | 2 | 36300985 | T | 0.00384 |
| rs3770866  | 2 | 36543597 | G | 0.00295 |
| rs848534   | 2 | 36543746 | C | 0.01307 |
| rs2160334  | 2 | 36900857 | A | 0.00560 |
| rs2540998  | 2 | 37108519 | T | 0.00788 |
| rs6724538  | 2 | 37581522 | C | 0.00276 |
| rs4430920  | 2 | 37611381 | G | 0.00759 |
| rs4538180  | 2 | 37616264 | T | 0.00267 |
| rs4670214  | 2 | 37858552 | C | 0.01661 |
| rs7588747  | 2 | 37891324 | A | 0.00306 |
| rs7604914  | 2 | 38104966 | C | 0.00182 |
| rs336034   | 2 | 38116617 | A | 0.01319 |
| rs7571015  | 2 | 38325002 | G | 0.01266 |
| rs1027880  | 2 | 38479811 | G | 0.01273 |
| rs17022684 | 2 | 38527042 | C | 0.01348 |
| rs6544186  | 2 | 39079775 | A | 0.00246 |
| rs7595469  | 2 | 39385585 | T | 0.01416 |
| rs6727511  | 2 | 39952885 | A | 0.01263 |
| rs17026012 | 2 | 40516922 | T | 0.01339 |
| rs11124763 | 2 | 40891407 | C | 0.01243 |
| rs6544381  | 2 | 41130008 | C | 0.00236 |
| rs6750424  | 2 | 41414230 | G | 0.01584 |

|            |   |          |   |         |
|------------|---|----------|---|---------|
| rs1976556  | 2 | 41422995 | G | 0.00180 |
| rs6544414  | 2 | 41468994 | G | 0.00043 |
| rs13006557 | 2 | 41702339 | C | 0.00302 |
| rs7603589  | 2 | 41871478 | G | 0.00451 |
| rs7599972  | 2 | 41894842 | T | 0.00382 |
| rs10193285 | 2 | 41896380 | T | 0.00157 |
| rs12471624 | 2 | 41900097 | T | 0.00762 |
| rs11689557 | 2 | 41902588 | A | 0.00318 |
| rs4142227  | 2 | 41909614 | G | 0.01119 |
| rs11692115 | 2 | 41922400 | C | 0.01046 |
| rs2374382  | 2 | 42108584 | A | 0.00223 |
| rs4952399  | 2 | 42142611 | A | 0.01549 |
| rs13383145 | 2 | 42158635 | A | 0.01332 |
| rs4408769  | 2 | 42949290 | A | 0.00689 |
| rs6722743  | 2 | 42949492 | T | 0.01598 |
| rs10176316 | 2 | 43052815 | T | 0.00999 |
| rs4608578  | 2 | 43106353 | C | 0.00851 |
| rs10205111 | 2 | 43126816 | G | 0.00678 |
| rs2052923  | 2 | 43265324 | C | 0.00325 |
| rs6544630  | 2 | 43277954 | T | 0.01058 |
| rs1873555  | 2 | 43633169 | G | 0.00194 |
| rs6731009  | 2 | 43656932 | C | 0.00980 |
| rs11890152 | 2 | 43660872 | G | 0.01349 |
| rs10179648 | 2 | 43661569 | G | 0.01235 |
| rs4245791  | 2 | 43927935 | A | 0.01010 |
| rs13008237 | 2 | 44258406 | G | 0.00292 |
| rs5024499  | 2 | 44300435 | A | 0.01540 |
| rs17032205 | 2 | 44510128 | T | 0.01651 |
| rs17322370 | 2 | 45592549 | C | 0.01073 |
| rs10427402 | 2 | 45597896 | A | 0.01291 |
| rs748573   | 2 | 45623898 | G | 0.01174 |
| rs656823   | 2 | 45780894 | G | 0.01184 |
| rs4952771  | 2 | 45852620 | C | 0.01220 |
| rs4953288  | 2 | 45979475 | C | 0.00750 |
| rs2278777  | 2 | 46225158 | C | 0.00268 |
| rs1530628  | 2 | 46524445 | G | 0.01589 |
| rs12622818 | 2 | 46530064 | C | 0.01086 |
| rs3087857  | 2 | 46999550 | A | 0.01274 |
| rs6544968  | 2 | 47230176 | C | 0.01439 |
| rs10153674 | 2 | 47254462 | T | 0.00207 |
| rs13422681 | 2 | 47313716 | A | 0.00066 |
| rs17503541 | 2 | 47661656 | A | 0.00064 |
| rs874869   | 2 | 47947841 | C | 0.00514 |
| rs4146603  | 2 | 48253519 | C | 0.00957 |

|            |   |          |   |         |
|------------|---|----------|---|---------|
| rs17037298 | 2 | 48445706 | G | 0.01286 |
| rs1404052  | 2 | 48764516 | G | 0.00523 |
| rs13427781 | 2 | 49245995 | G | 0.00914 |
| rs6545137  | 2 | 50067182 | A | 0.00485 |
| rs10197380 | 2 | 50561680 | C | 0.00420 |
| rs1014428  | 2 | 50589711 | C | 0.01553 |
| rs1919424  | 2 | 51588583 | G | 0.01149 |
| rs1997160  | 2 | 52556920 | G | 0.00514 |
| rs41372250 | 2 | 52585423 | G | 0.01434 |
| rs350795   | 2 | 52765124 | C | 0.01648 |
| rs10490580 | 2 | 52909400 | G | 0.01321 |
| rs6746666  | 2 | 52942850 | T | 0.01031 |
| rs1446439  | 2 | 53072707 | G | 0.00099 |
| rs992874   | 2 | 53385960 | G | 0.01645 |
| rs6714458  | 2 | 53473610 | A | 0.00488 |
| rs6747724  | 2 | 53528203 | G | 0.00150 |
| rs3213775  | 2 | 54003741 | G | 0.01197 |
| rs1727522  | 2 | 54263682 | A | 0.00559 |
| rs843632   | 2 | 54399097 | G | 0.00201 |
| rs4261758  | 2 | 54623147 | G | 0.01603 |
| rs12713265 | 2 | 54658913 | C | 0.00915 |
| rs10196667 | 2 | 55036454 | C | 0.00277 |
| rs2580770  | 2 | 55068416 | G | 0.01302 |
| rs1133182  | 2 | 55255729 | G | 0.00228 |
| rs4484068  | 2 | 55387690 | C | 0.01122 |
| rs11899888 | 2 | 55956248 | A | 0.00491 |
| rs13397916 | 2 | 56104751 | G | 0.00658 |
| rs6749100  | 2 | 56291693 | T | 0.01099 |
| rs214047   | 2 | 56344184 | C | 0.00130 |
| rs10168390 | 2 | 56442719 | T | 0.00517 |
| rs1465360  | 2 | 56541768 | G | 0.00311 |
| rs13382678 | 2 | 56542552 | A | 0.01098 |
| rs10208385 | 2 | 56631513 | A | 0.00138 |
| rs1991185  | 2 | 56651833 | G | 0.01341 |
| rs6741957  | 2 | 56931249 | T | 0.01230 |
| rs4672171  | 2 | 56973220 | G | 0.01223 |
| rs12478403 | 2 | 57151802 | C | 0.00243 |
| rs2311314  | 2 | 57586041 | C | 0.00648 |
| rs6545656  | 2 | 57621291 | C | 0.00497 |
| rs1350691  | 2 | 57784475 | T | 0.00530 |
| rs13399274 | 2 | 58376084 | G | 0.00453 |
| rs4672238  | 2 | 58472642 | G | 0.00955 |
| rs4672240  | 2 | 58503859 | C | 0.01239 |
| rs10179027 | 2 | 58505942 | T | 2.63800 |

|            |   |          |   |         |
|------------|---|----------|---|---------|
| rs6759994  | 2 | 58517880 | A | 8.86200 |
| rs1019283  | 2 | 58519124 | A | 0.00723 |
| rs7419776  | 2 | 58706520 | A | 0.01660 |
| rs4672251  | 2 | 58711046 | C | 0.01561 |
| rs17614872 | 2 | 58767709 | C | 0.00031 |
| rs4671330  | 2 | 58896351 | A | 0.01479 |
| rs1990588  | 2 | 58948113 | C | 0.01332 |
| rs2192692  | 2 | 58958028 | T | 0.01381 |
| rs3732139  | 2 | 59006670 | G | 0.00074 |
| rs1990542  | 2 | 59234260 | C | 0.01061 |
| rs11679178 | 2 | 59401559 | G | 0.00368 |
| rs17050481 | 2 | 59980105 | A | 0.00978 |
| rs4672337  | 2 | 60070597 | T | 0.00977 |
| rs887930   | 2 | 60187236 | T | 0.01318 |
| rs6714188  | 2 | 60201921 | G | 0.00723 |
| rs13420896 | 2 | 60204549 | G | 0.01578 |
| rs13411643 | 2 | 60204636 | C | 0.01103 |
| rs13427381 | 2 | 60205897 | T | 0.00451 |
| rs4671378  | 2 | 60347816 | C | 0.00935 |
| rs11688740 | 2 | 60391494 | G | 0.00451 |
| rs888082   | 2 | 60483113 | C | 0.00485 |
| rs10445937 | 2 | 60491160 | G | 0.00331 |
| rs7593947  | 2 | 60558437 | A | 0.00626 |
| rs2290324  | 2 | 61302280 | C | 0.01303 |
| rs10518958 | 2 | 62130477 | A | 0.00257 |
| rs4528740  | 2 | 62552513 | G | 0.00622 |
| rs6545961  | 2 | 62667670 | T | 0.00540 |
| rs6545963  | 2 | 62676395 | T | 0.00296 |
| rs6752010  | 2 | 62712546 | C | 0.01286 |
| rs10177638 | 2 | 62740514 | C | 0.00671 |
| rs6757128  | 2 | 62745256 | T | 0.00452 |
| rs11899693 | 2 | 64024923 | C | 0.00002 |
| rs1529102  | 2 | 64349131 | T | 0.01248 |
| rs2555445  | 2 | 64388785 | A | 0.00294 |
| rs1861402  | 2 | 64733367 | C | 0.00181 |
| rs2422282  | 2 | 64753358 | A | 0.01289 |
| rs6736527  | 2 | 64806767 | T | 0.00002 |
| rs6743585  | 2 | 65409224 | G | 0.00907 |
| rs3845822  | 2 | 65937700 | T | 0.00400 |
| rs1484475  | 2 | 66061623 | A | 0.00770 |
| rs2971826  | 2 | 66410740 | G | 0.00580 |
| rs6546227  | 2 | 66470568 | T | 0.01044 |
| rs2300478  | 2 | 66634957 | C | 0.00200 |
| rs17630500 | 2 | 66857427 | G | 0.01541 |



|            |   |          |   |         |
|------------|---|----------|---|---------|
| rs10519086 | 2 | 67116150 | A | 0.01623 |
| rs10202108 | 2 | 67578542 | C | 0.01125 |
| rs1607904  | 2 | 67611284 | T | 0.01075 |
| rs6546313  | 2 | 67625132 | C | 0.01087 |
| rs4591326  | 2 | 67707461 | G | 0.01490 |
| rs10490726 | 2 | 67720046 | T | 0.00789 |
| rs11126163 | 2 | 67941672 | C | 0.00137 |
| rs872108   | 2 | 67997099 | A | 0.00909 |
| rs4605401  | 2 | 68964520 | G | 0.00384 |
| rs17036182 | 2 | 68965530 | C | 0.00857 |
| rs4417751  | 2 | 69055398 | G | 0.01284 |
| rs722265   | 2 | 69835595 | T | 0.01629 |
| rs7597199  | 2 | 70195079 | G | 0.01307 |
| rs4853334  | 2 | 70214454 | G | 0.01400 |
| rs13394815 | 2 | 70417506 | A | 0.01000 |
| rs6546602  | 2 | 70494258 | A | 0.00702 |
| rs516383   | 2 | 70517615 | C | 0.00560 |
| rs2461861  | 2 | 70517893 | C | 0.01453 |
| rs11890652 | 2 | 70523791 | A | 0.01084 |
| rs1523305  | 2 | 70552364 | A | 0.01570 |
| rs11903352 | 2 | 70718658 | A | 0.01416 |
| rs1859919  | 2 | 70718791 | A | 0.01480 |
| rs1859920  | 2 | 70719422 | A | 0.01275 |
| rs6713842  | 2 | 70725313 | C | 0.00539 |
| rs2108479  | 2 | 70727597 | A | 0.00924 |
| rs12617676 | 2 | 70732192 | A | 0.01485 |
| rs6735921  | 2 | 70877919 | T | 0.00150 |
| rs6546693  | 2 | 71534140 | G | 0.00052 |
| rs13431785 | 2 | 71546325 | C | 0.01444 |
| rs4536672  | 2 | 71567731 | T | 0.01082 |
| rs17007070 | 2 | 71647874 | G | 0.00014 |
| rs1529409  | 2 | 71684197 | T | 0.00490 |
| rs908611   | 2 | 72031795 | G | 0.01603 |
| rs6752766  | 2 | 72041872 | C | 0.01202 |
| rs6760964  | 2 | 73240894 | G | 0.01469 |
| rs7607014  | 2 | 73583682 | T | 0.00877 |
| rs12713810 | 2 | 74173770 | C | 0.00482 |
| rs7572066  | 2 | 74219540 | G | 0.01112 |
| rs3099820  | 2 | 74267259 | T | 0.00074 |
| rs9309484  | 2 | 74440319 | G | 0.01269 |
| rs6723379  | 2 | 74469370 | C | 0.01071 |
| rs3025979  | 2 | 74701323 | T | 0.01094 |
| rs7574100  | 2 | 74844393 | G | 0.00934 |
| rs6546923  | 2 | 74865835 | G | 0.01535 |

|            |   |          |   |         |
|------------|---|----------|---|---------|
| rs3821317  | 2 | 75240319 | G | 0.00948 |
| rs2216104  | 2 | 75526992 | C | 0.01459 |
| rs1158392  | 2 | 75564253 | T | 0.00679 |
| rs10175794 | 2 | 75646134 | A | 0.01249 |
| rs1049678  | 2 | 75736164 | G | 0.00793 |
| rs3213670  | 2 | 75746345 | T | 0.00147 |
| rs6751526  | 2 | 75974112 | A | 0.01499 |
| rs373745   | 2 | 76103130 | T | 0.01175 |
| rs2049548  | 2 | 76420715 | C | 0.00015 |
| rs10193916 | 2 | 76612596 | T | 0.00162 |
| rs1921254  | 2 | 76615993 | A | 0.01193 |
| rs10195937 | 2 | 76851271 | G | 0.00385 |
| rs12611712 | 2 | 77350750 | T | 0.00614 |
| rs1922817  | 2 | 77566115 | C | 0.01064 |
| rs1516254  | 2 | 78589291 | G | 0.01121 |
| rs6739221  | 2 | 78852724 | G | 0.01061 |
| rs283892   | 2 | 79203764 | A | 0.00354 |
| rs12713984 | 2 | 79438511 | A | 0.01427 |
| rs896372   | 2 | 79486782 | T | 0.01273 |
| rs1367401  | 2 | 79719016 | G | 0.01592 |
| rs713261   | 2 | 79948920 | C | 0.00563 |
| rs1979515  | 2 | 80127741 | C | 0.00566 |
| rs6711603  | 2 | 80429338 | A | 0.00907 |
| rs13396392 | 2 | 80471916 | A | 0.00117 |
| rs1434075  | 2 | 80596705 | A | 0.01189 |
| rs216645   | 2 | 80679222 | A | 0.00868 |
| rs4852603  | 2 | 81143795 | C | 0.00527 |
| rs17020098 | 2 | 81314283 | G | 0.01484 |
| rs11887827 | 2 | 81519665 | T | 0.00080 |
| rs12468325 | 2 | 81544091 | C | 0.00091 |
| rs17659181 | 2 | 81553048 | C | 0.00590 |
| rs6715049  | 2 | 81626505 | T | 0.00067 |
| rs41362844 | 2 | 81787642 | T | 0.00240 |
| rs11678573 | 2 | 82056717 | T | 0.01048 |
| rs1521694  | 2 | 82079119 | C | 0.01461 |
| rs909045   | 2 | 82081198 | A | 0.01053 |
| rs13023451 | 2 | 82237331 | T | 0.00089 |
| rs7601571  | 2 | 82603966 | G | 0.00061 |
| rs7558379  | 2 | 82858244 | C | 0.00253 |
| rs17022516 | 2 | 82905461 | G | 0.00249 |
| rs17022594 | 2 | 82922840 | G | 0.01587 |
| rs2163253  | 2 | 83234615 | A | 0.00089 |
| rs1947465  | 2 | 84471616 | C | 0.00178 |
| rs4832126  | 2 | 84995378 | C | 0.01366 |

|            |   |           |   |         |
|------------|---|-----------|---|---------|
| rs1382506  | 2 | 85001079  | G | 0.00555 |
| rs17025940 | 2 | 85228793  | T | 0.01627 |
| rs7574999  | 2 | 85364476  | G | 0.00339 |
| rs12714139 | 2 | 85385318  | A | 0.00068 |
| rs2304564  | 2 | 85706178  | T | 0.00051 |
| rs1105864  | 2 | 86480775  | T | 0.00616 |
| rs6749703  | 2 | 86908760  | T | 0.01166 |
| rs1518713  | 2 | 87373867  | A | 0.01159 |
| rs6547736  | 2 | 87533266  | G | 0.01359 |
| rs2970911  | 2 | 88176939  | T | 0.00317 |
| rs17037827 | 2 | 88306046  | C | 0.00161 |
| rs1258410  | 2 | 88399634  | G | 0.01105 |
| rs1258407  | 2 | 88400714  | A | 0.00994 |
| rs6739095  | 2 | 88661179  | T | 0.00255 |
| rs17838439 | 2 | 88788402  | G | 0.01182 |
| rs11690687 | 2 | 97828253  | C | 0.00047 |
| rs4851884  | 2 | 98162224  | G | 0.01354 |
| rs1010387  | 2 | 98189693  | T | 0.00485 |
| rs4851170  | 2 | 98870755  | A | 0.00015 |
| rs1955393  | 2 | 99252733  | A | 0.00740 |
| rs901596   | 2 | 99254889  | A | 0.00728 |
| rs4850905  | 2 | 99518797  | T | 0.00515 |
| rs9678859  | 2 | 99654910  | T | 0.00229 |
| rs13419977 | 2 | 99760452  | G | 0.00226 |
| rs6755935  | 2 | 99762971  | G | 0.00187 |
| rs4449188  | 2 | 99915769  | G | 0.00347 |
| rs2970990  | 2 | 100566861 | A | 0.01211 |
| rs2309846  | 2 | 100567880 | G | 0.01389 |
| rs2139404  | 2 | 100608026 | G | 0.01374 |
| rs4851365  | 2 | 100657569 | T | 0.00065 |
| rs11685537 | 2 | 102040872 | T | 0.01270 |
| rs1420097  | 2 | 102375786 | G | 0.00753 |
| rs4851004  | 2 | 102375969 | G | 0.00656 |
| rs2287034  | 2 | 102377020 | A | 0.00372 |
| rs1901480  | 2 | 103619437 | G | 0.00168 |
| rs938872   | 2 | 103794391 | T | 0.00932 |
| rs7572010  | 2 | 104401359 | C | 0.00670 |
| rs396610   | 2 | 104770276 | T | 0.00379 |
| rs4266037  | 2 | 105097181 | T | 0.01022 |
| rs4271787  | 2 | 105097307 | T | 0.01564 |
| rs2679882  | 2 | 105157510 | C | 0.00909 |
| rs6723624  | 2 | 105163732 | C | 0.01087 |
| rs10496390 | 2 | 105205223 | T | 0.01214 |
| rs2679895  | 2 | 105272912 | C | 0.00444 |

|            |   |           |   |         |
|------------|---|-----------|---|---------|
| rs873738   | 2 | 105291513 | G | 0.01273 |
| rs6752668  | 2 | 105713648 | G | 0.00232 |
| rs17031659 | 2 | 105714942 | A | 0.01084 |
| rs3769499  | 2 | 105847877 | T | 0.00394 |
| rs1647675  | 2 | 105992459 | C | 0.00728 |
| rs6717628  | 2 | 106339783 | T | 0.00088 |
| rs7565431  | 2 | 106815984 | T | 0.01386 |
| rs2108208  | 2 | 106860071 | G | 0.00756 |
| rs12712262 | 2 | 106882965 | C | 0.00943 |
| rs6720783  | 2 | 107989754 | C | 0.00276 |
| rs1563119  | 2 | 108152299 | C | 0.01122 |
| rs9646947  | 2 | 108230082 | A | 0.01036 |
| rs921656   | 2 | 108253437 | C | 0.00851 |
| rs7565363  | 2 | 109121873 | C | 0.00704 |
| rs2118828  | 2 | 110234340 | G | 0.00614 |
| rs10180345 | 2 | 112457764 | A | 0.00621 |
| rs11683409 | 2 | 112486605 | C | 0.00848 |
| rs934748   | 2 | 113074753 | A | 0.00509 |
| rs1530549  | 2 | 113533926 | T | 0.00626 |
| rs6759676  | 2 | 113552819 | G | 0.00325 |
| rs7574787  | 2 | 113553887 | T | 0.00400 |
| rs4849152  | 2 | 113565045 | C | 0.00060 |
| rs3748916  | 2 | 113700504 | C | 0.00324 |
| rs17633451 | 2 | 114245347 | A | 0.01408 |
| rs156719   | 2 | 114526503 | A | 0.01019 |
| rs17048190 | 2 | 114636263 | G | 0.01556 |
| rs6744934  | 2 | 114896383 | G | 0.01136 |
| rs4488674  | 2 | 116147698 | T | 0.00582 |
| rs10174913 | 2 | 116491637 | C | 0.00638 |
| rs41383544 | 2 | 116711729 | C | 0.00919 |
| rs12476141 | 2 | 118191287 | G | 0.01320 |
| rs408507   | 2 | 118220469 | A | 0.01472 |
| rs4848465  | 2 | 118228304 | C | 0.01544 |
| rs7559497  | 2 | 118235289 | G | 0.00631 |
| rs11675138 | 2 | 118592854 | G | 0.01371 |
| rs13409573 | 2 | 118604875 | A | 0.00889 |
| rs3849331  | 2 | 118624828 | G | 0.00820 |
| rs11123476 | 2 | 118644190 | A | 0.01285 |
| rs4849683  | 2 | 118663113 | C | 0.00520 |
| rs17006624 | 2 | 119266362 | A | 0.00499 |
| rs17006964 | 2 | 119298975 | T | 0.00948 |
| rs7595954  | 2 | 119691991 | C | 0.00783 |
| rs838074   | 2 | 119729734 | A | 0.01100 |
| rs752185   | 2 | 119786225 | T | 0.01555 |

|            |   |           |   |         |
|------------|---|-----------|---|---------|
| rs4241156  | 2 | 120748165 | T | 0.00488 |
| rs13410508 | 2 | 120946066 | A | 0.00225 |
| rs11122825 | 2 | 121308178 | G | 0.00302 |
| rs1466042  | 2 | 121419389 | T | 0.01037 |
| rs753727   | 2 | 121767700 | A | 8.73800 |
| rs7581005  | 2 | 122198612 | G | 0.00192 |
| rs10460462 | 2 | 122316276 | T | 0.00426 |
| rs10460453 | 2 | 122317772 | G | 0.01346 |
| rs10496583 | 2 | 122835383 | A | 0.01502 |
| rs7585269  | 2 | 122979395 | C | 0.00565 |
| rs2091427  | 2 | 123023527 | G | 0.00512 |
| rs11122916 | 2 | 123042613 | C | 0.00936 |
| rs12474979 | 2 | 123106758 | G | 0.00159 |
| rs893743   | 2 | 123168265 | C | 0.01113 |
| rs12619304 | 2 | 123188589 | G | 0.00227 |
| rs7607585  | 2 | 123206763 | G | 0.01357 |
| rs17008553 | 2 | 123206801 | C | 0.00783 |
| rs17008704 | 2 | 123272345 | G | 0.00105 |
| rs17008879 | 2 | 123371606 | T | 0.01021 |
| rs1850585  | 2 | 123379760 | C | 0.00991 |
| rs10496603 | 2 | 123433151 | C | 0.00104 |
| rs2661038  | 2 | 123557229 | T | 0.00797 |
| rs13009000 | 2 | 123772494 | A | 0.00726 |
| rs993934   | 2 | 123825683 | C | 0.00343 |
| rs11122979 | 2 | 123890625 | C | 0.00373 |
| rs11678698 | 2 | 124098180 | T | 0.00755 |
| rs13020843 | 2 | 124193068 | A | 0.00408 |
| rs10496637 | 2 | 125023660 | A | 0.00510 |
| rs1587789  | 2 | 125107810 | T | 0.00639 |
| rs41393446 | 2 | 125766987 | T | 0.01442 |
| rs4849019  | 2 | 125997677 | G | 0.00147 |
| rs1455608  | 2 | 126444744 | G | 0.00865 |
| rs17013415 | 2 | 126681928 | T | 0.01645 |
| rs451639   | 2 | 126711318 | G | 0.01375 |
| rs11695820 | 2 | 126942871 | A | 0.00904 |
| rs10173017 | 2 | 127000106 | G | 0.00592 |
| rs10928980 | 2 | 127181439 | G | 0.00154 |
| rs11691902 | 2 | 128290513 | G | 0.00402 |
| rs6722778  | 2 | 128475570 | C | 0.00712 |
| rs13386088 | 2 | 128745361 | G | 0.01259 |
| rs841466   | 2 | 129052823 | A | 0.00695 |
| rs3856370  | 2 | 129284172 | T | 0.01445 |
| rs17049013 | 2 | 129485802 | G | 0.00563 |
| rs1519446  | 2 | 129560995 | G | 0.00106 |

|            |   |           |   |         |
|------------|---|-----------|---|---------|
| rs12612255 | 2 | 129621210 | G | 0.00376 |
| rs751070   | 2 | 129708174 | T | 0.00051 |
| rs4613217  | 2 | 130033518 | A | 0.00918 |
| rs11681113 | 2 | 130123690 | G | 0.01315 |
| rs6430737  | 2 | 131814612 | C | 0.00294 |
| rs941325   | 2 | 131874454 | C | 0.01359 |
| rs6712428  | 2 | 132334259 | C | 0.00994 |
| rs12618338 | 2 | 132999524 | T | 0.00217 |
| rs6755486  | 2 | 133098462 | C | 0.01553 |
| rs984521   | 2 | 133209220 | C | 0.01544 |
| rs16842407 | 2 | 133322655 | C | 0.01035 |
| rs974625   | 2 | 133362363 | T | 0.01641 |
| rs6711103  | 2 | 133986047 | C | 0.00662 |
| rs2043233  | 2 | 134030848 | A | 0.00711 |
| rs7592519  | 2 | 134303528 | C | 0.00724 |
| rs7607165  | 2 | 134307196 | C | 0.00542 |
| rs7594893  | 2 | 134361815 | G | 0.00375 |
| rs10928469 | 2 | 134397888 | A | 0.00818 |
| rs13409218 | 2 | 134414690 | G | 0.01568 |
| rs16830034 | 2 | 134554646 | T | 0.01137 |
| rs6743206  | 2 | 135410007 | C | 0.00783 |
| rs7577175  | 2 | 135831902 | C | 0.00944 |
| rs16832138 | 2 | 136353820 | C | 0.01594 |
| rs13032229 | 2 | 136865724 | T | 0.00678 |
| rs16855680 | 2 | 137057240 | A | 0.01377 |
| rs12691894 | 2 | 137058414 | T | 0.00860 |
| rs1344712  | 2 | 137445484 | C | 0.00273 |
| rs1897420  | 2 | 137473291 | C | 0.00455 |
| rs6713475  | 2 | 137685986 | T | 0.01618 |
| rs4610107  | 2 | 137696788 | G | 0.00977 |
| rs4954485  | 2 | 137696948 | T | 0.01066 |
| rs10211049 | 2 | 138771181 | T | 0.00212 |
| rs1485055  | 2 | 139403085 | G | 0.00986 |
| rs6728841  | 2 | 139451263 | T | 0.00747 |
| rs17755242 | 2 | 139627873 | G | 0.01607 |
| rs13029794 | 2 | 139631252 | A | 0.00385 |
| rs16841830 | 2 | 139664403 | G | 0.00231 |
| rs4954757  | 2 | 139709212 | T | 0.00515 |
| rs344696   | 2 | 139842930 | T | 0.00869 |
| rs7604667  | 2 | 139899653 | T | 0.01194 |
| rs10200212 | 2 | 139920877 | G | 0.00099 |
| rs17712931 | 2 | 139921301 | A | 0.01457 |
| rs2376454  | 2 | 140141111 | A | 0.01314 |
| rs9646702  | 2 | 140205658 | T | 0.01558 |

|            |   |           |   |         |
|------------|---|-----------|---|---------|
| rs12992137 | 2 | 140812377 | A | 0.01152 |
| rs10209173 | 2 | 141088732 | C | 0.00639 |
| rs547663   | 2 | 141099297 | T | 0.00450 |
| rs3936044  | 2 | 141944581 | C | 0.00436 |
| rs13016459 | 2 | 142351017 | T | 0.01305 |
| rs10496922 | 2 | 142787807 | C | 0.00195 |
| rs4662300  | 2 | 143291329 | G | 0.00311 |
| rs7561260  | 2 | 143439309 | G | 0.01581 |
| rs12996951 | 2 | 143975121 | G | 0.01388 |
| rs4334442  | 2 | 144040124 | C | 0.01508 |
| rs1864245  | 2 | 144494988 | G | 0.01073 |
| rs1365777  | 2 | 144946327 | A | 0.01635 |
| rs10196335 | 2 | 145045858 | A | 0.01616 |
| rs2381683  | 2 | 145456026 | A | 0.00090 |
| rs13406759 | 2 | 145693365 | C | 0.00093 |
| rs11687420 | 2 | 145762035 | T | 0.00328 |
| rs1023964  | 2 | 146076321 | G | 0.00610 |
| rs1370521  | 2 | 146221152 | T | 0.01115 |
| rs2063807  | 2 | 146404405 | G | 0.01344 |
| rs10184605 | 2 | 146832784 | T | 0.01089 |
| rs7425557  | 2 | 147293495 | T | 0.00471 |
| rs7601098  | 2 | 148393084 | C | 0.00018 |
| rs16828024 | 2 | 148393603 | T | 0.00079 |
| rs16829119 | 2 | 149124709 | A | 0.01441 |
| rs7591997  | 2 | 149306244 | C | 0.00709 |
| rs7606125  | 2 | 149306355 | T | 0.01409 |
| rs6755213  | 2 | 149539190 | G | 0.00793 |
| rs1032034  | 2 | 149637902 | T | 0.01145 |
| rs6735761  | 2 | 149901271 | C | 0.01502 |
| rs4667337  | 2 | 150159074 | G | 0.00690 |
| rs1526285  | 2 | 150216771 | G | 0.00404 |
| rs16827337 | 2 | 150254854 | A | 0.00604 |
| rs4667399  | 2 | 150313035 | A | 0.00615 |
| rs9288711  | 2 | 150435612 | A | 0.01665 |
| rs330578   | 2 | 150633167 | C | 0.00158 |
| rs41341145 | 2 | 152487598 | C | 0.00292 |
| rs12467610 | 2 | 152907092 | A | 0.00054 |
| rs12620257 | 2 | 154950270 | T | 0.00169 |
| rs12470887 | 2 | 155032549 | T | 0.00605 |
| rs10932484 | 2 | 155957632 | A | 0.00691 |
| rs4664173  | 2 | 155963884 | A | 0.00564 |
| rs7594035  | 2 | 157481345 | G | 0.00579 |
| rs16841337 | 2 | 157714141 | C | 0.00806 |
| rs16841926 | 2 | 158221448 | C | 0.00921 |

|            |   |           |   |         |
|------------|---|-----------|---|---------|
| rs41407646 | 2 | 158901798 | C | 0.01529 |
| rs10190089 | 2 | 158957987 | T | 0.01465 |
| rs4664970  | 2 | 159103608 | G | 0.01201 |
| rs11901072 | 2 | 160661295 | T | 0.00894 |
| rs7588696  | 2 | 160772831 | T | 0.01010 |
| rs1350313  | 2 | 160780790 | T | 0.00614 |
| rs12998587 | 2 | 160950541 | A | 0.01347 |
| rs4591356  | 2 | 161206111 | C | 0.00054 |
| rs523454   | 2 | 161440327 | G | 0.00904 |
| rs1267031  | 2 | 161849065 | C | 0.00476 |
| rs6720056  | 2 | 161857779 | A | 0.00213 |
| rs16846050 | 2 | 162271799 | A | 0.00748 |
| rs4091356  | 2 | 163256031 | T | 0.00254 |
| rs10178838 | 2 | 163604069 | G | 0.00833 |
| rs2198225  | 2 | 164984842 | A | 0.01047 |
| rs1357119  | 2 | 165121630 | A | 0.00785 |
| rs355909   | 2 | 165352791 | G | 0.01562 |
| rs10170193 | 2 | 165358313 | A | 0.00911 |
| rs776488   | 2 | 165598979 | A | 0.00593 |
| rs16850186 | 2 | 165732166 | T | 0.00246 |
| rs7600082  | 2 | 165826106 | T | 0.00949 |
| rs11885110 | 2 | 166132558 | T | 0.00457 |
| rs490463   | 2 | 166694213 | A | 0.01040 |
| rs17745411 | 2 | 166695014 | C | 0.00799 |
| rs4341952  | 2 | 166728262 | T | 0.00561 |
| rs2226711  | 2 | 166817960 | C | 0.00876 |
| rs17581506 | 2 | 168272600 | A | 0.00760 |
| rs6433027  | 2 | 168572606 | A | 0.01302 |
| rs2044958  | 2 | 168928347 | T | 0.01529 |
| rs2044959  | 2 | 168928396 | A | 0.01664 |
| rs41342544 | 2 | 168928713 | C | 0.01661 |
| rs7601307  | 2 | 169245657 | A | 0.01046 |
| rs3845727  | 2 | 169358617 | T | 0.00372 |
| rs16855893 | 2 | 169360893 | C | 0.00053 |
| rs2389605  | 2 | 169538297 | T | 0.00762 |
| rs6759156  | 2 | 169552855 | T | 0.00413 |
| rs13430236 | 2 | 169589746 | C | 0.00598 |
| rs6747692  | 2 | 169787791 | A | 0.00677 |
| rs6717393  | 2 | 170248026 | G | 0.00524 |
| rs3914752  | 2 | 170833364 | A | 0.01231 |
| rs908782   | 2 | 170837608 | C | 0.01319 |
| rs2118674  | 2 | 171027140 | T | 0.00303 |
| rs2160231  | 2 | 171186648 | C | 0.00754 |
| rs2059723  | 2 | 171539443 | T | 0.01354 |



|            |   |           |   |         |
|------------|---|-----------|---|---------|
| rs6745725  | 2 | 172163179 | G | 0.01385 |
| rs788164   | 2 | 172621636 | G | 0.00179 |
| rs1843755  | 2 | 172723356 | A | 0.00680 |
| rs2171319  | 2 | 172768668 | C | 0.00429 |
| rs6707676  | 2 | 172981792 | C | 0.01613 |
| rs7604728  | 2 | 173576054 | G | 0.00045 |
| rs7573673  | 2 | 173640508 | A | 0.01028 |
| rs6758859  | 2 | 173673302 | G | 0.00224 |
| rs16861393 | 2 | 173800841 | C | 0.00996 |
| rs4972566  | 2 | 174022407 | G | 0.01007 |
| rs12328679 | 2 | 174149739 | A | 0.00760 |
| rs10497408 | 2 | 174445369 | G | 0.00292 |
| rs7601227  | 2 | 174587420 | C | 0.01005 |
| rs2044470  | 2 | 174640083 | T | 0.00163 |
| rs10930638 | 2 | 174682842 | A | 0.01647 |
| rs17239377 | 2 | 174688585 | T | 0.01610 |
| rs17320968 | 2 | 174884534 | G | 0.00047 |
| rs935866   | 2 | 175310212 | A | 0.00666 |
| rs2123117  | 2 | 175310260 | T | 0.01271 |
| rs2646173  | 2 | 175325924 | G | 0.00316 |
| rs2244340  | 2 | 175349821 | G | 0.01454 |
| rs13408856 | 2 | 175459752 | G | 0.00127 |
| rs16862989 | 2 | 175631114 | G | 0.00924 |
| rs17270532 | 2 | 175725442 | C | 0.00624 |
| rs6742336  | 2 | 175903850 | A | 0.00072 |
| rs4625873  | 2 | 176384591 | G | 0.00494 |
| rs847138   | 2 | 176609446 | T | 0.00023 |
| rs6712866  | 2 | 176885163 | C | 0.00414 |
| rs2139615  | 2 | 176986713 | T | 0.00057 |
| rs3898818  | 2 | 177049059 | C | 0.00978 |
| rs10177590 | 2 | 177357008 | G | 0.01380 |
| rs2696970  | 2 | 177364678 | T | 0.01033 |
| rs1405613  | 2 | 177442858 | G | 0.01265 |
| rs4368367  | 2 | 177663894 | T | 0.00475 |
| rs4893829  | 2 | 178108056 | A | 0.00241 |
| rs1527405  | 2 | 178234073 | A | 0.00119 |
| rs4893984  | 2 | 178265165 | G | 0.00930 |
| rs41357848 | 2 | 178397207 | A | 0.00466 |
| rs334068   | 2 | 178713684 | G | 0.01137 |
| rs6739142  | 2 | 179006070 | A | 0.01056 |
| rs3816345  | 2 | 179683130 | G | 0.00565 |
| rs6718670  | 2 | 180352126 | C | 0.00769 |
| rs17175114 | 2 | 180562865 | G | 0.00128 |
| rs10497556 | 2 | 180649047 | C | 0.00211 |

|            |   |           |   |          |
|------------|---|-----------|---|----------|
| rs16867176 | 2 | 180653374 | T | 0.00881  |
| rs4438449  | 2 | 180824043 | G | 0.00460  |
| rs10460373 | 2 | 181181226 | T | 0.00092  |
| rs2113780  | 2 | 181280598 | G | 0.00883  |
| rs2292855  | 2 | 181634030 | C | 0.01500  |
| rs4667055  | 2 | 181657755 | G | 0.01330  |
| rs7566314  | 2 | 181846802 | C | 0.01143  |
| rs17365432 | 2 | 181883021 | G | 0.01542  |
| rs1371619  | 2 | 181897795 | G | 0.00819  |
| rs959633   | 2 | 181950150 | A | 0.00456  |
| rs3770110  | 2 | 182090612 | C | 0.00806  |
| rs16867447 | 2 | 182133792 | A | 0.00837  |
| rs16867450 | 2 | 182165046 | A | 0.01486  |
| rs16867452 | 2 | 182168626 | T | 0.00331  |
| rs9807949  | 2 | 182363251 | A | 0.00353  |
| rs3108789  | 2 | 182625507 | A | 0.00077  |
| rs1430163  | 2 | 183045838 | G | 0.00603  |
| rs17356901 | 2 | 183402422 | G | 0.01513  |
| rs2045761  | 2 | 183840419 | A | 0.00510  |
| rs17760425 | 2 | 184032166 | A | 10.33000 |
| rs10187085 | 2 | 184323021 | G | 0.00618  |
| rs17784870 | 2 | 184479968 | T | 0.00897  |
| rs4303682  | 2 | 184565829 | A | 0.00690  |
| rs7349369  | 2 | 184942347 | G | 0.01186  |
| rs17508595 | 2 | 185191353 | C | 0.01108  |
| rs17331619 | 2 | 185991563 | A | 0.01218  |
| rs11693975 | 2 | 186246637 | T | 0.00650  |
| rs1019429  | 2 | 186360004 | C | 0.00680  |
| rs36004074 | 2 | 186373677 | G | 0.01326  |
| rs11695215 | 2 | 186374069 | T | 0.00526  |
| rs1862066  | 2 | 186380157 | C | 0.00514  |
| rs10804002 | 2 | 186629611 | G | 0.00042  |
| rs4461230  | 2 | 186780020 | A | 0.01378  |
| rs10174098 | 2 | 187200987 | G | 0.00859  |
| rs7595459  | 2 | 187397582 | C | 0.00982  |
| rs7598838  | 2 | 187398066 | C | 0.00643  |
| rs6726153  | 2 | 187422167 | A | 0.00394  |
| rs16828665 | 2 | 187708832 | C | 0.00757  |
| rs3815524  | 2 | 187932567 | G | 0.00075  |
| rs7591919  | 2 | 188357832 | T | 0.01491  |
| rs10166301 | 2 | 189656059 | G | 0.01277  |
| rs2351932  | 2 | 189904154 | A | 0.00440  |
| rs11695159 | 2 | 189991460 | T | 0.00964  |
| rs4324342  | 2 | 191067224 | C | 0.01659  |

|            |   |           |   |         |
|------------|---|-----------|---|---------|
| rs2192008  | 2 | 191253392 | C | 0.00543 |
| rs6434412  | 2 | 191293520 | A | 0.00803 |
| rs11687659 | 2 | 191449442 | C | 0.00231 |
| rs6718902  | 2 | 191546449 | G | 0.00601 |
| rs11676659 | 2 | 191627599 | T | 0.00121 |
| rs41321746 | 2 | 192384170 | G | 0.01039 |
| rs4853492  | 2 | 192740989 | A | 0.00563 |
| rs10497737 | 2 | 193532430 | G | 0.01070 |
| rs10169076 | 2 | 195054116 | G | 0.00176 |
| rs13009328 | 2 | 195179543 | A | 0.01192 |
| rs41367247 | 2 | 195435240 | C | 0.01095 |
| rs16841170 | 2 | 196024099 | T | 0.00815 |
| rs1554168  | 2 | 196192437 | C | 0.00065 |
| rs16842044 | 2 | 196288141 | G | 0.00304 |
| rs7593761  | 2 | 196983848 | C | 0.00746 |
| rs7590951  | 2 | 197007679 | G | 0.01584 |
| rs10167169 | 2 | 197158863 | T | 0.00354 |
| rs7572953  | 2 | 197194201 | T | 0.01190 |
| rs332301   | 2 | 197473294 | T | 0.00095 |
| rs12693803 | 2 | 197520866 | T | 0.00109 |
| rs2697307  | 2 | 197783710 | G | 0.01153 |
| rs6434970  | 2 | 198987616 | C | 0.01575 |
| rs1598656  | 2 | 199583342 | A | 0.00741 |
| rs10804088 | 2 | 199776297 | G | 0.00358 |
| rs16831557 | 2 | 200095936 | G | 0.00625 |
| rs6706499  | 2 | 200559059 | A | 0.01564 |
| rs2470900  | 2 | 201211143 | A | 0.00950 |
| rs6747253  | 2 | 201456660 | A | 0.00201 |
| rs13402805 | 2 | 202256209 | A | 0.00260 |
| rs10469756 | 2 | 202288513 | T | 0.01576 |
| rs12470229 | 2 | 202305680 | G | 0.01062 |
| rs7597560  | 2 | 202666759 | T | 0.00280 |
| rs4303700  | 2 | 202954656 | T | 0.00332 |
| rs4675296  | 2 | 203401804 | G | 0.00391 |
| rs10174652 | 2 | 204135585 | A | 0.00705 |
| rs16841256 | 2 | 205008062 | A | 0.00190 |
| rs1861763  | 2 | 205237235 | G | 0.01587 |
| rs6754606  | 2 | 205632522 | G | 0.00843 |
| rs17284800 | 2 | 205679048 | C | 0.00038 |
| rs1921797  | 2 | 205795364 | A | 0.00611 |
| rs6758662  | 2 | 205795592 | C | 0.00753 |
| rs10206071 | 2 | 205796347 | G | 0.00356 |
| rs7593566  | 2 | 205804065 | A | 0.00781 |
| rs11687914 | 2 | 206072732 | G | 0.00324 |

|            |   |           |   |         |
|------------|---|-----------|---|---------|
| rs4675600  | 2 | 206925173 | A | 0.01653 |
| rs2269183  | 2 | 207063599 | A | 0.00797 |
| rs6707178  | 2 | 207312672 | A | 0.00171 |
| rs6435354  | 2 | 207409396 | T | 0.00427 |
| rs12694063 | 2 | 207445996 | T | 0.01607 |
| rs1031432  | 2 | 207448975 | A | 0.01453 |
| rs2078     | 2 | 207493189 | C | 0.00729 |
| rs4675644  | 2 | 207548577 | C | 0.00387 |
| rs2161767  | 2 | 207930506 | A | 0.00343 |
| rs11677782 | 2 | 208532296 | G | 0.00068 |
| rs10497890 | 2 | 208561544 | C | 0.00655 |
| rs10932231 | 2 | 208637557 | G | 0.00944 |
| rs6713275  | 2 | 208669669 | C | 0.01371 |
| rs9808109  | 2 | 209157156 | T | 0.00100 |
| rs10804172 | 2 | 209590225 | T | 0.01369 |
| rs17738962 | 2 | 209766313 | T | 0.00681 |
| rs16842904 | 2 | 210021033 | G | 0.00670 |
| rs4338912  | 2 | 210946396 | G | 0.00245 |
| rs10515951 | 2 | 211139283 | G | 0.01103 |
| rs12474633 | 2 | 211395843 | T | 0.00656 |
| rs6435616  | 2 | 211856516 | A | 0.00564 |
| rs16846100 | 2 | 211986463 | A | 0.01455 |
| rs11894784 | 2 | 212409273 | C | 0.01494 |
| rs2457183  | 2 | 214343577 | C | 0.01062 |
| rs11893486 | 2 | 214380536 | A | 0.00056 |
| rs1582839  | 2 | 214391459 | T | 2.97100 |
| rs4503943  | 2 | 214423220 | A | 0.00721 |
| rs6727011  | 2 | 215247415 | G | 0.00529 |
| rs16852802 | 2 | 215380286 | G | 0.01634 |
| rs1004302  | 2 | 215718734 | A | 0.00863 |
| rs4280455  | 2 | 215811528 | C | 0.00191 |
| rs1051677  | 2 | 216778493 | T | 0.00800 |
| rs6435958  | 2 | 217604857 | T | 0.00719 |
| rs6435981  | 2 | 217965888 | G | 0.00840 |
| rs17804901 | 2 | 217971121 | G | 0.01437 |
| rs2113828  | 2 | 217990872 | A | 0.01246 |
| rs9288531  | 2 | 218238563 | G | 0.01268 |
| rs7573770  | 2 | 218531119 | A | 0.00711 |
| rs9989854  | 2 | 219794524 | C | 0.00544 |
| rs10804287 | 2 | 220854709 | T | 0.01208 |
| rs7573045  | 2 | 220891067 | G | 0.00509 |
| rs2068114  | 2 | 220998471 | C | 0.00503 |
| rs7568936  | 2 | 221439604 | T | 0.01067 |
| rs7422206  | 2 | 221987613 | A | 0.00083 |

|            |   |           |   |         |
|------------|---|-----------|---|---------|
| rs16863084 | 2 | 222369010 | C | 0.00063 |
| rs348984   | 2 | 222640734 | C | 0.01255 |
| rs6436292  | 2 | 222680987 | A | 0.01557 |
| rs2053319  | 2 | 222686533 | T | 0.00225 |
| rs6436314  | 2 | 222921375 | G | 0.01524 |
| rs12621612 | 2 | 222971761 | C | 0.00322 |
| rs17564655 | 2 | 223143895 | A | 0.01213 |
| rs16864505 | 2 | 223727014 | C | 0.01101 |
| rs4234046  | 2 | 223775131 | C | 0.00248 |
| rs2141784  | 2 | 224007049 | C | 0.00233 |
| rs1439929  | 2 | 224106243 | C | 0.00966 |
| rs7603262  | 2 | 224344734 | C | 0.00206 |
| rs7605583  | 2 | 224987718 | T | 0.00091 |
| rs10498166 | 2 | 225223726 | G | 0.00103 |
| rs6750925  | 2 | 225751889 | G | 0.01363 |
| rs2396192  | 2 | 225813538 | A | 0.01103 |
| rs10153937 | 2 | 225873256 | C | 0.00227 |
| rs9973944  | 2 | 225952373 | T | 0.00015 |
| rs7593510  | 2 | 226180950 | C | 0.00550 |
| rs10451590 | 2 | 226438495 | A | 0.01568 |
| rs6735439  | 2 | 226587842 | T | 0.00099 |
| rs12621261 | 2 | 226613705 | C | 0.00657 |
| rs11684232 | 2 | 226630137 | G | 0.01565 |
| rs4673157  | 2 | 226641531 | A | 0.00778 |
| rs1273810  | 2 | 227182674 | T | 0.00885 |
| rs1273812  | 2 | 227186131 | A | 0.00974 |
| rs12621407 | 2 | 227206764 | A | 0.00416 |
| rs2396385  | 2 | 227211369 | A | 0.01623 |
| rs17198764 | 2 | 227214712 | G | 0.00666 |
| rs1882579  | 2 | 227224085 | T | 0.00103 |
| rs1882580  | 2 | 227226692 | G | 0.01495 |
| rs2178707  | 2 | 227234630 | A | 0.01336 |
| rs2396427  | 2 | 227388355 | G | 0.00843 |
| rs2078635  | 2 | 227728735 | C | 0.00813 |
| rs10203311 | 2 | 228744501 | G | 0.00408 |
| rs4133088  | 2 | 228766316 | C | 0.00353 |
| rs1863073  | 2 | 228986187 | G | 0.00026 |
| rs996682   | 2 | 229093994 | T | 0.01374 |
| rs975519   | 2 | 229098461 | G | 0.00945 |
| rs9288635  | 2 | 229102479 | C | 0.01507 |
| rs16825116 | 2 | 229114929 | T | 0.00213 |
| rs918896   | 2 | 229124541 | T | 0.01306 |
| rs1435850  | 2 | 229139165 | A | 0.00015 |
| rs41330849 | 2 | 229166212 | T | 0.01514 |

|            |   |           |   |         |
|------------|---|-----------|---|---------|
| rs12468084 | 2 | 230304596 | T | 0.01562 |
| rs546530   | 2 | 230461208 | G | 0.00549 |
| rs6757156  | 2 | 230528844 | T | 0.00431 |
| rs16826767 | 2 | 230734072 | G | 0.01065 |
| rs6755898  | 2 | 230734362 | A | 0.01488 |
| rs6436929  | 2 | 230957035 | A | 0.00680 |
| rs7559665  | 2 | 230965056 | A | 0.00952 |
| rs6751402  | 2 | 231074806 | T | 0.00297 |
| rs6747431  | 2 | 231249581 | C | 0.00666 |
| rs3106304  | 2 | 231532556 | G | 0.00089 |
| rs11674265 | 2 | 231569945 | T | 0.01019 |
| rs4973370  | 2 | 231590362 | A | 0.00097 |
| rs6437002  | 2 | 231733528 | G | 0.00472 |
| rs17199614 | 2 | 232166101 | A | 0.00104 |
| rs10195385 | 2 | 232428983 | A | 0.00245 |
| rs11901692 | 2 | 232857983 | A | 0.00358 |
| rs6746834  | 2 | 232867061 | C | 0.00201 |
| rs1881495  | 2 | 233080644 | A | 0.00670 |
| rs3791725  | 2 | 233126885 | A | 0.01504 |
| rs1284     | 2 | 233431426 | G | 0.00381 |
| rs1104953  | 2 | 233578610 | C | 0.01082 |
| rs10193545 | 2 | 233580344 | C | 0.01531 |
| rs4257390  | 2 | 233637754 | C | 0.01205 |
| rs6437090  | 2 | 233670795 | G | 0.00731 |
| rs7566221  | 2 | 233944034 | G | 0.00811 |
| rs2602381  | 2 | 234249063 | T | 0.00754 |
| rs741157   | 2 | 234375903 | A | 0.00846 |
| rs4616477  | 2 | 234606029 | T | 0.00997 |
| rs715272   | 2 | 234764957 | A | 0.00686 |
| rs6715142  | 2 | 235229041 | C | 0.00708 |
| rs11687004 | 2 | 235230882 | G | 0.01083 |
| rs4663470  | 2 | 235252279 | T | 0.00337 |
| rs10803629 | 2 | 235556384 | G | 0.00690 |
| rs6746703  | 2 | 235727802 | T | 0.00762 |
| rs4583410  | 2 | 237089164 | T | 0.00658 |
| rs872121   | 2 | 237560929 | G | 0.00239 |
| rs11683554 | 2 | 237608906 | T | 0.01342 |
| rs2646261  | 2 | 237924126 | C | 0.00993 |
| rs2875729  | 2 | 238132139 | T | 0.01503 |
| rs6431547  | 2 | 238157857 | C | 0.01060 |
| rs2029770  | 2 | 238225988 | G | 0.01312 |
| rs6738488  | 2 | 238494352 | G | 0.01661 |
| rs3739057  | 2 | 238665045 | A | 0.00671 |
| rs4663304  | 2 | 238898471 | A | 0.01269 |

|            |   |           |   |         |
|------------|---|-----------|---|---------|
| rs4663887  | 2 | 238955705 | C | 0.00429 |
| rs4663907  | 2 | 239138174 | C | 0.00625 |
| rs12619578 | 2 | 239180160 | T | 0.00417 |
| rs1397328  | 2 | 239233691 | A | 0.00352 |
| rs7558129  | 2 | 239252712 | T | 0.00610 |
| rs4241229  | 2 | 239534776 | T | 0.00455 |
| rs6706785  | 2 | 240108990 | C | 0.00036 |
| rs1495921  | 2 | 240858601 | A | 0.00842 |
| rs7607116  | 2 | 240888050 | G | 0.00159 |
| rs12474682 | 2 | 240891998 | T | 0.00159 |
| rs4676354  | 2 | 241104923 | T | 0.01478 |
| rs4676431  | 2 | 241105074 | G | 0.00964 |
| rs2060188  | 2 | 241242617 | C | 0.00496 |
| rs10933628 | 2 | 241243318 | G | 0.01112 |
| rs4675841  | 2 | 241525253 | A | 0.00144 |
| rs7601544  | 2 | 242295023 | C | 0.00908 |
| rs11711363 | 3 | 115727    | A | 0.01364 |
| rs2133402  | 3 | 231258    | A | 0.00173 |
| rs17019407 | 3 | 300068    | A | 0.01144 |
| rs330893   | 3 | 347448    | T | 0.00036 |
| rs1065035  | 3 | 423979    | T | 0.01096 |
| rs13079540 | 3 | 446460    | C | 0.01586 |
| rs12495737 | 3 | 853511    | A | 0.01368 |
| rs12637032 | 3 | 883745    | T | 0.01096 |
| rs4684830  | 3 | 1235260   | C | 0.00790 |
| rs17193526 | 3 | 1475657   | C | 0.00187 |
| rs41530846 | 3 | 1875711   | C | 0.00225 |
| rs10510266 | 3 | 3527756   | G | 0.00899 |
| rs17034952 | 3 | 3665897   | C | 0.01154 |
| rs3959     | 3 | 3783819   | C | 0.01049 |
| rs310704   | 3 | 4294728   | A | 0.01579 |
| rs17042217 | 3 | 5323688   | T | 0.01519 |
| rs7626628  | 3 | 5474832   | A | 0.01302 |
| rs6790004  | 3 | 5670779   | A | 0.00415 |
| rs17287960 | 3 | 6073050   | A | 0.00099 |
| rs6792001  | 3 | 6081251   | A | 0.01375 |
| rs6800214  | 3 | 6364075   | C | 0.01381 |
| rs164722   | 3 | 6634381   | T | 0.00622 |
| rs163967   | 3 | 6751604   | C | 0.01429 |
| rs17288442 | 3 | 6841379   | A | 0.00219 |
| rs17751439 | 3 | 6985587   | G | 0.00618 |
| rs1356268  | 3 | 6996095   | G | 0.00937 |
| rs12487503 | 3 | 7456068   | A | 0.00561 |
| rs779741   | 3 | 7558602   | C | 0.00764 |

|            |   |          |   |         |
|------------|---|----------|---|---------|
| rs7614915  | 3 | 7595382  | G | 0.01510 |
| rs1485174  | 3 | 7595828  | C | 0.01621 |
| rs9860395  | 3 | 7693570  | C | 0.00468 |
| rs5010733  | 3 | 7814573  | G | 0.01504 |
| rs17825275 | 3 | 7933489  | C | 0.01633 |
| rs1695564  | 3 | 8455539  | A | 0.00648 |
| rs358270   | 3 | 8465918  | A | 0.00998 |
| rs358267   | 3 | 8467724  | A | 0.00322 |
| rs1038483  | 3 | 8469627  | T | 0.00392 |
| rs17049174 | 3 | 8484497  | C | 0.00776 |
| rs9861544  | 3 | 8519420  | C | 0.00570 |
| rs1994876  | 3 | 8524665  | T | 0.01187 |
| rs4143966  | 3 | 8533515  | G | 0.00246 |
| rs1947220  | 3 | 8537637  | G | 0.01450 |
| rs1493588  | 3 | 8543956  | G | 0.00997 |
| rs9810512  | 3 | 8545874  | G | 0.01624 |
| rs371734   | 3 | 8614568  | T | 0.01474 |
| rs9878735  | 3 | 8620740  | G | 0.00403 |
| rs17049652 | 3 | 8864189  | A | 0.00867 |
| rs486012   | 3 | 9016299  | T | 0.00141 |
| rs341795   | 3 | 9021906  | T | 0.00638 |
| rs341788   | 3 | 9025659  | C | 0.00280 |
| rs2669986  | 3 | 9098116  | T | 0.01562 |
| rs531719   | 3 | 9111060  | C | 0.01411 |
| rs2543494  | 3 | 9156903  | T | 0.01389 |
| rs6765880  | 3 | 9207109  | T | 0.00853 |
| rs2259100  | 3 | 9549327  | T | 0.00716 |
| rs6809387  | 3 | 9677755  | T | 0.00175 |
| rs12490544 | 3 | 9711452  | C | 0.01649 |
| rs17032283 | 3 | 10056545 | G | 0.01221 |
| rs10490816 | 3 | 10310172 | G | 0.01391 |
| rs1473183  | 3 | 10386827 | T | 0.00490 |
| rs9822852  | 3 | 10617892 | T | 0.01200 |
| rs3774108  | 3 | 10898193 | C | 0.01621 |
| rs1881370  | 3 | 10949156 | C | 0.01439 |
| rs1728810  | 3 | 10992443 | A | 0.00274 |
| rs9830784  | 3 | 11409605 | G | 0.00936 |
| rs17776482 | 3 | 11608951 | T | 0.00650 |
| rs7613596  | 3 | 11665450 | G | 0.01216 |
| rs1039200  | 3 | 11705846 | T | 0.00277 |
| rs4684815  | 3 | 11810539 | C | 0.00297 |
| rs9842727  | 3 | 11830968 | A | 0.01440 |
| rs11712268 | 3 | 11891653 | G | 0.01048 |
| rs2600272  | 3 | 12011495 | G | 0.01586 |



|            |   |          |   |         |
|------------|---|----------|---|---------|
| rs310751   | 3 | 12248621 | T | 0.01491 |
| rs471259   | 3 | 13204324 | G | 0.01488 |
| rs17038082 | 3 | 13375275 | A | 0.01011 |
| rs7635926  | 3 | 13403413 | G | 0.00276 |
| rs4684940  | 3 | 13530297 | A | 0.01397 |
| rs17038609 | 3 | 13825703 | G | 0.01395 |
| rs4685039  | 3 | 13841500 | C | 0.01419 |
| rs6442417  | 3 | 13882158 | G | 0.00793 |
| rs1488377  | 3 | 14048179 | C | 0.00186 |
| rs8516     | 3 | 14159670 | T | 0.01039 |
| rs874969   | 3 | 14352613 | T | 0.00264 |
| rs13062253 | 3 | 14558198 | G | 0.00961 |
| rs9830416  | 3 | 14697574 | G | 0.01135 |
| rs7649009  | 3 | 14810869 | A | 0.00156 |
| rs1689549  | 3 | 14812477 | G | 0.00020 |
| rs17477703 | 3 | 15038530 | C | 0.00249 |
| rs10510446 | 3 | 16164025 | A | 0.01610 |
| rs2657589  | 3 | 16168521 | T | 0.00758 |
| rs563395   | 3 | 16342262 | T | 0.00091 |
| rs6797529  | 3 | 16637492 | G | 0.01173 |
| rs17042619 | 3 | 16723364 | C | 0.00005 |
| rs9822053  | 3 | 16875228 | A | 0.01147 |
| rs17043092 | 3 | 17109603 | T | 0.01472 |
| rs283907   | 3 | 17311423 | T | 0.01573 |
| rs7644389  | 3 | 17477922 | T | 0.00961 |
| rs9758423  | 3 | 18403654 | C | 0.00277 |
| rs7433351  | 3 | 19019071 | T | 0.00058 |
| rs7433126  | 3 | 19022444 | C | 0.00556 |
| rs6550864  | 3 | 19025360 | T | 0.01644 |
| rs7638224  | 3 | 19025817 | T | 0.00781 |
| rs9681366  | 3 | 19058788 | C | 0.00873 |
| rs13090408 | 3 | 19066516 | A | 0.01513 |
| rs7612947  | 3 | 19092122 | C | 0.01273 |
| rs3916092  | 3 | 19921061 | A | 0.00883 |
| rs3804570  | 3 | 20167059 | A | 0.00897 |
| rs3852067  | 3 | 20194481 | G | 0.01000 |
| rs4858191  | 3 | 20412612 | C | 0.01051 |
| rs6793327  | 3 | 20440212 | T | 0.00264 |
| rs679267   | 3 | 20499811 | A | 0.00981 |
| rs11927689 | 3 | 20532192 | G | 0.00225 |
| rs17554682 | 3 | 21713165 | T | 0.01302 |
| rs4528971  | 3 | 22216114 | A | 0.00315 |
| rs2728988  | 3 | 22275887 | G | 0.01478 |
| rs1491881  | 3 | 22309107 | T | 0.01461 |

|            |   |          |   |         |
|------------|---|----------|---|---------|
| rs9882017  | 3 | 22621739 | G | 0.01508 |
| rs7636994  | 3 | 23120110 | A | 0.00964 |
| rs13098494 | 3 | 23390701 | G | 0.00762 |
| rs13093140 | 3 | 23517018 | A | 0.00826 |
| rs7429885  | 3 | 23716534 | G | 0.00573 |
| rs6550788  | 3 | 23734941 | T | 0.00909 |
| rs6550853  | 3 | 24241988 | T | 0.00045 |
| rs1449874  | 3 | 24246832 | G | 0.01288 |
| rs4413265  | 3 | 24721324 | A | 0.01225 |
| rs1317177  | 3 | 24865084 | T | 0.00165 |
| rs322681   | 3 | 25304796 | G | 0.00012 |
| rs322668   | 3 | 25318619 | G | 0.00474 |
| rs17523645 | 3 | 25398435 | C | 0.01427 |
| rs4681024  | 3 | 25450886 | C | 6.03900 |
| rs4681025  | 3 | 25450928 | G | 0.00605 |
| rs1488209  | 3 | 26831534 | C | 0.00480 |
| rs12630194 | 3 | 27376689 | A | 0.01315 |
| rs2887957  | 3 | 27876742 | C | 0.01360 |
| rs17688561 | 3 | 28099213 | C | 0.01024 |
| rs6549870  | 3 | 28678368 | A | 0.00834 |
| rs6549938  | 3 | 29420467 | G | 0.00921 |
| rs9824170  | 3 | 29473011 | T | 0.01280 |
| rs1434012  | 3 | 30099233 | A | 0.00896 |
| rs9869272  | 3 | 30288914 | A | 0.01373 |
| rs11917205 | 3 | 30545602 | T | 0.00488 |
| rs2116138  | 3 | 30577634 | T | 0.01052 |
| rs9843942  | 3 | 30704640 | C | 0.00757 |
| rs1494741  | 3 | 30970990 | C | 0.00224 |
| rs6772140  | 3 | 31002768 | C | 0.01408 |
| rs4955377  | 3 | 31187597 | A | 0.00901 |
| rs7626417  | 3 | 31384916 | A | 0.00012 |
| rs9848240  | 3 | 31486695 | G | 0.00171 |
| rs3762794  | 3 | 31735440 | G | 0.00388 |
| rs10780017 | 3 | 31942454 | C | 0.00276 |
| rs6798586  | 3 | 32107036 | T | 0.01137 |
| rs6802418  | 3 | 32371808 | A | 0.01353 |
| rs9827863  | 3 | 33093955 | C | 0.00328 |
| rs9817055  | 3 | 33545331 | C | 0.00486 |
| rs9311026  | 3 | 33780565 | A | 0.01372 |
| rs7649584  | 3 | 33849455 | C | 0.00476 |
| rs12715223 | 3 | 33917129 | G | 0.01018 |
| rs17031242 | 3 | 34058010 | C | 0.01047 |
| rs13322449 | 3 | 34627200 | A | 0.00915 |
| rs7646181  | 3 | 34821028 | C | 0.00326 |

|            |   |          |   |         |
|------------|---|----------|---|---------|
| rs885314   | 3 | 34915736 | G | 0.01413 |
| rs11129626 | 3 | 34950049 | G | 0.00284 |
| rs17032625 | 3 | 35052013 | G | 0.01121 |
| rs6799641  | 3 | 35661736 | T | 0.00132 |
| rs999745   | 3 | 36652151 | G | 0.01640 |
| rs5009838  | 3 | 36656030 | T | 0.01537 |
| rs11710386 | 3 | 36656248 | T | 0.00941 |
| rs17197692 | 3 | 36750950 | C | 0.01153 |
| rs4624519  | 3 | 36837984 | A | 0.00454 |
| rs6765624  | 3 | 36902550 | C | 0.00383 |
| rs9828017  | 3 | 37174809 | T | 0.00872 |
| rs17036298 | 3 | 37402202 | C | 0.01389 |
| rs1800     | 3 | 37780866 | T | 0.00181 |
| rs17037369 | 3 | 38103093 | A | 0.00805 |
| rs6599263  | 3 | 38119879 | T | 0.01439 |
| rs6767684  | 3 | 38160178 | T | 0.01617 |
| rs3805040  | 3 | 38287376 | C | 0.00531 |
| rs149741   | 3 | 38401120 | T | 0.00837 |
| rs6599214  | 3 | 38604818 | G | 0.00532 |
| rs6422142  | 3 | 38678162 | G | 0.00125 |
| rs6599240  | 3 | 38713721 | A | 0.01454 |
| rs9311196  | 3 | 38734720 | G | 0.01179 |
| rs12491593 | 3 | 38764283 | G | 0.00565 |
| rs9847662  | 3 | 38776649 | T | 0.01462 |
| rs6599027  | 3 | 39469508 | A | 0.01579 |
| rs4132209  | 3 | 40160639 | C | 0.01442 |
| rs2679807  | 3 | 40170210 | C | 0.01217 |
| rs10510721 | 3 | 41559677 | T | 0.00021 |
| rs9856633  | 3 | 41988854 | T | 0.00551 |
| rs10865916 | 3 | 42229487 | C | 0.00353 |
| rs11129950 | 3 | 42289591 | C | 0.00403 |
| rs17074351 | 3 | 42408309 | G | 0.00426 |
| rs7639483  | 3 | 42729357 | A | 0.00493 |
| rs579878   | 3 | 42989054 | A | 0.00745 |
| rs11708336 | 3 | 45168460 | A | 0.00756 |
| rs4388012  | 3 | 45971505 | G | 0.00175 |
| rs17215981 | 3 | 46099422 | C | 0.01419 |
| rs11919943 | 3 | 46241730 | G | 0.01504 |
| rs9862388  | 3 | 46479320 | C | 0.01025 |
| rs9808967  | 3 | 46564298 | T | 0.00883 |
| rs2280413  | 3 | 46596797 | T | 0.00603 |
| rs6442008  | 3 | 46620757 | T | 0.00549 |
| rs7652849  | 3 | 46923530 | G | 0.00079 |
| rs3772399  | 3 | 47842731 | G | 0.00837 |

|            |   |          |   |         |
|------------|---|----------|---|---------|
| rs319694   | 3 | 47859957 | A | 0.01198 |
| rs3731544  | 3 | 48183001 | A | 0.01274 |
| rs9837228  | 3 | 48299470 | A | 0.01528 |
| rs13090538 | 3 | 48345773 | C | 0.00625 |
| rs4441646  | 3 | 51395461 | T | 0.01172 |
| rs9864693  | 3 | 51631410 | C | 0.01090 |
| rs2251219  | 3 | 52559827 | T | 0.01197 |
| rs11242    | 3 | 53100962 | T | 0.01179 |
| rs3774425  | 3 | 53533163 | A | 0.00755 |
| rs6794085  | 3 | 53624648 | C | 0.01111 |
| rs7622708  | 3 | 54073856 | A | 0.00978 |
| rs3934631  | 3 | 54305495 | G | 0.00382 |
| rs1530733  | 3 | 54364155 | A | 0.01457 |
| rs9817603  | 3 | 54431818 | G | 0.01449 |
| rs6445664  | 3 | 54459140 | A | 0.01203 |
| rs1317838  | 3 | 54798638 | C | 0.01586 |
| rs9808962  | 3 | 54916481 | T | 0.01133 |
| rs1918070  | 3 | 54916618 | T | 0.01076 |
| rs2048805  | 3 | 54946579 | G | 0.00110 |
| rs17054602 | 3 | 54959264 | A | 0.00803 |
| rs3821659  | 3 | 54962963 | A | 0.01258 |
| rs358005   | 3 | 55096940 | C | 0.00730 |
| rs458308   | 3 | 55281435 | C | 0.00540 |
| rs590386   | 3 | 55474447 | A | 0.01639 |
| rs12106807 | 3 | 55553035 | C | 0.00138 |
| rs2702139  | 3 | 55671242 | A | 0.01289 |
| rs815416   | 3 | 55685495 | C | 0.01504 |
| rs4542991  | 3 | 55800741 | G | 0.00830 |
| rs4541375  | 3 | 55917587 | C | 0.01014 |
| rs7647972  | 3 | 56116883 | C | 0.00821 |
| rs9874662  | 3 | 56123924 | T | 0.00032 |
| rs17056472 | 3 | 56129715 | C | 0.01266 |
| rs7625422  | 3 | 56130461 | C | 0.01555 |
| rs1452220  | 3 | 56233367 | T | 0.00549 |
| rs9873480  | 3 | 56245378 | C | 0.01530 |
| rs6763275  | 3 | 56282743 | G | 0.01226 |
| rs9881216  | 3 | 56491685 | A | 0.00300 |
| rs4681726  | 3 | 56667682 | C | 0.00138 |
| rs13063588 | 3 | 56852960 | G | 0.00468 |
| rs6801499  | 3 | 57006509 | A | 0.01296 |
| rs4399856  | 3 | 57055753 | C | 0.00532 |
| rs13084781 | 3 | 57392474 | C | 0.00967 |
| rs12715520 | 3 | 58037232 | C | 0.01119 |
| rs2178773  | 3 | 58136814 | G | 0.01140 |

|             |   |          |   |         |
|-------------|---|----------|---|---------|
| rs6807301   | 3 | 58171883 | A | 0.01288 |
| rs6762104   | 3 | 58482360 | G | 0.00037 |
| rs7624292   | 3 | 58719181 | G | 0.01487 |
| rs13090159  | 3 | 59294201 | A | 0.00201 |
| rs2064016   | 3 | 60091095 | A | 0.00523 |
| rs802933    | 3 | 60172525 | A | 0.00469 |
| rs386348    | 3 | 60408264 | A | 0.01346 |
| rs2594141   | 3 | 60783325 | T | 0.00230 |
| rs41347853  | 3 | 60917337 | T | 0.01311 |
| rs111130849 | 3 | 61578941 | A | 0.00612 |
| rs7609954   | 3 | 61611196 | A | 0.01595 |
| rs645957    | 3 | 61738529 | G | 0.00907 |
| rs11923681  | 3 | 62124475 | T | 0.01453 |
| rs4072198   | 3 | 62187107 | G | 0.00903 |
| rs2242352   | 3 | 62256476 | G | 0.00409 |
| rs9883112   | 3 | 62279360 | C | 0.01665 |
| rs1901525   | 3 | 62425082 | T | 0.01512 |
| rs17696120  | 3 | 62526070 | T | 0.00140 |
| rs111130920 | 3 | 63260778 | T | 0.00283 |
| rs1451312   | 3 | 63282908 | T | 0.00633 |
| rs13061130  | 3 | 63306518 | A | 0.00533 |
| rs4688397   | 3 | 63392531 | C | 0.00964 |
| rs1505589   | 3 | 63460528 | G | 0.00631 |
| rs17069000  | 3 | 63500328 | T | 0.01383 |
| rs6785893   | 3 | 63538798 | C | 0.00933 |
| rs17399554  | 3 | 63542394 | T | 0.01591 |
| rs2087704   | 3 | 63795533 | A | 0.00906 |
| rs831571    | 3 | 64023337 | G | 0.01217 |
| rs9812324   | 3 | 64292581 | T | 0.00360 |
| rs719775    | 3 | 64366493 | T | 0.00761 |
| rs10470705  | 3 | 64483477 | C | 0.01545 |
| rs7642335   | 3 | 64510911 | G | 0.00980 |
| rs988487    | 3 | 65163493 | G | 0.00452 |
| rs2371864   | 3 | 65172526 | A | 0.00049 |
| rs9854952   | 3 | 65307422 | T | 0.01364 |
| rs7649739   | 3 | 65373938 | C | 0.00910 |
| rs6762815   | 3 | 65401481 | C | 0.00906 |
| rs4375986   | 3 | 65415821 | G | 0.00431 |
| rs13077233  | 3 | 65493500 | T | 0.01210 |
| rs7612634   | 3 | 65576699 | G | 0.01651 |
| rs7612636   | 3 | 65576717 | C | 0.00885 |
| rs7612644   | 3 | 65576735 | A | 0.01029 |
| rs1495448   | 3 | 65785954 | A | 0.01418 |
| rs10510947  | 3 | 65804384 | G | 0.00877 |

|            |   |          |   |         |
|------------|---|----------|---|---------|
| rs12487264 | 3 | 66558327 | A | 0.01356 |
| rs783511   | 3 | 66558558 | A | 0.01408 |
| rs2198795  | 3 | 67089922 | A | 0.00366 |
| rs1387866  | 3 | 67439543 | A | 0.00498 |
| rs2101566  | 3 | 67513045 | C | 0.01350 |
| rs2362440  | 3 | 67872311 | C | 0.00835 |
| rs9812892  | 3 | 67923787 | C | 0.00138 |
| rs876535   | 3 | 68923672 | G | 0.00936 |
| rs4855516  | 3 | 68940970 | C | 0.00121 |
| rs2130439  | 3 | 68952118 | A | 0.01036 |
| rs10470577 | 3 | 68956675 | T | 0.01433 |
| rs7375020  | 3 | 69156607 | C | 0.00561 |
| rs6784841  | 3 | 69336322 | A | 0.00742 |
| rs17354285 | 3 | 69594893 | C | 0.00062 |
| rs10428111 | 3 | 69818348 | A | 0.00640 |
| rs13314892 | 3 | 69877742 | A | 0.01102 |
| rs9811939  | 3 | 70451282 | T | 0.01027 |
| rs4491863  | 3 | 70607102 | G | 0.01658 |
| rs1565552  | 3 | 70786437 | T | 0.00462 |
| rs7633132  | 3 | 70874359 | T | 0.00965 |
| rs831081   | 3 | 71515298 | T | 0.01001 |
| rs7630905  | 3 | 71555237 | C | 0.01187 |
| rs17656368 | 3 | 71556906 | C | 0.00535 |
| rs9878602  | 3 | 71618028 | T | 0.00668 |
| rs704279   | 3 | 71794669 | C | 0.01431 |
| rs4552321  | 3 | 72065199 | T | 0.01145 |
| rs4345037  | 3 | 72065251 | G | 0.00401 |
| rs906037   | 3 | 72102600 | G | 0.00989 |
| rs17009330 | 3 | 72179505 | A | 0.00356 |
| rs11928774 | 3 | 72522839 | T | 0.01264 |
| rs2118592  | 3 | 72587344 | G | 0.01322 |
| rs934840   | 3 | 72599055 | T | 0.01517 |
| rs923573   | 3 | 72779317 | G | 0.00184 |
| rs1123121  | 3 | 72779850 | G | 0.00072 |
| rs7637085  | 3 | 72801997 | A | 0.00585 |
| rs7628968  | 3 | 73253048 | T | 0.01436 |
| rs557919   | 3 | 73378282 | G | 0.01601 |
| rs1482170  | 3 | 73445935 | C | 0.00731 |
| rs11711610 | 3 | 73656047 | A | 0.00589 |
| rs9310276  | 3 | 73786831 | T | 0.01528 |
| rs1511530  | 3 | 73852548 | G | 0.00378 |
| rs6770929  | 3 | 73934726 | C | 0.00270 |
| rs12488030 | 3 | 74562933 | C | 0.00136 |
| rs9828888  | 3 | 75043354 | T | 0.01104 |

|            |   |          |   |         |
|------------|---|----------|---|---------|
| rs4420916  | 3 | 75072673 | A | 0.01025 |
| rs6785246  | 3 | 75173405 | T | 0.01232 |
| rs4635750  | 3 | 75180559 | A | 0.00879 |
| rs6549701  | 3 | 75277146 | T | 0.00107 |
| rs9877751  | 3 | 75285062 | T | 0.01457 |
| rs13083349 | 3 | 75332099 | A | 0.00465 |
| rs4072316  | 3 | 75352178 | C | 0.01384 |
| rs6809747  | 3 | 77252417 | T | 0.01166 |
| rs9876344  | 3 | 77388581 | A | 0.00452 |
| rs9882239  | 3 | 77405024 | G | 0.00032 |
| rs974342   | 3 | 77413286 | C | 0.00413 |
| rs6788301  | 3 | 77855335 | A | 0.01461 |
| rs11920974 | 3 | 78517533 | T | 0.00401 |
| rs531125   | 3 | 78997791 | A | 0.00179 |
| rs7629235  | 3 | 80355605 | G | 0.01448 |
| rs9883980  | 3 | 80553686 | C | 0.00044 |
| rs1406781  | 3 | 80677712 | C | 0.00454 |
| rs7431461  | 3 | 80682502 | C | 0.00529 |
| rs6786939  | 3 | 80887895 | G | 0.01568 |
| rs17018482 | 3 | 81212634 | T | 0.01078 |
| rs2578318  | 3 | 81235306 | T | 0.01455 |
| rs3772891  | 3 | 81859450 | A | 0.00877 |
| rs1464790  | 3 | 81935613 | A | 0.01327 |
| rs1524557  | 3 | 81974721 | G | 0.01655 |
| rs1464791  | 3 | 81976619 | A | 0.00755 |
| rs7621968  | 3 | 82034150 | G | 0.00273 |
| rs7633528  | 3 | 82043128 | A | 0.01360 |
| rs834858   | 3 | 82742725 | A | 0.00423 |
| rs12330257 | 3 | 82874037 | T | 0.00383 |
| rs9842015  | 3 | 83059425 | G | 0.00914 |
| rs12629030 | 3 | 84771824 | G | 0.00235 |
| rs7635613  | 3 | 85390651 | A | 0.00084 |
| rs9847998  | 3 | 85479859 | G | 0.01072 |
| rs12493423 | 3 | 85484512 | A | 0.01045 |
| rs9836755  | 3 | 85922061 | A | 0.01418 |
| rs13093396 | 3 | 86250563 | G | 0.01266 |
| rs1809631  | 3 | 87329061 | T | 0.00033 |
| rs12634593 | 3 | 88978938 | T | 0.00149 |
| rs7634358  | 3 | 89953636 | C | 0.01050 |
| rs7633240  | 3 | 89987959 | T | 0.01478 |
| rs12106694 | 3 | 90034988 | A | 0.00499 |
| rs6551453  | 3 | 90252295 | G | 0.00310 |
| rs9289536  | 3 | 95031169 | T | 0.00168 |
| rs9713061  | 3 | 95073766 | T | 0.00129 |

|            |   |           |   |         |
|------------|---|-----------|---|---------|
| rs6810199  | 3 | 95606242  | T | 0.01587 |
| rs11919338 | 3 | 96692513  | T | 0.01366 |
| rs4574293  | 3 | 96693865  | C | 0.00211 |
| rs6787987  | 3 | 96760311  | T | 0.00316 |
| rs6803348  | 3 | 96817623  | G | 0.00514 |
| rs9871481  | 3 | 97187270  | G | 0.01001 |
| rs7612359  | 3 | 97462883  | A | 0.01308 |
| rs9874467  | 3 | 97625924  | C | 0.01006 |
| rs326296   | 3 | 97643917  | G | 0.00545 |
| rs4320074  | 3 | 97837784  | G | 0.00266 |
| rs2027815  | 3 | 98202619  | T | 0.00558 |
| rs16838976 | 3 | 99092149  | C | 0.00004 |
| rs13059366 | 3 | 99249465  | A | 0.01055 |
| rs4603997  | 3 | 99511686  | T | 0.00699 |
| rs7639655  | 3 | 99853530  | A | 0.00361 |
| rs2454673  | 3 | 100103809 | A | 0.00347 |
| rs2690231  | 3 | 100257503 | G | 0.00204 |
| rs1610265  | 3 | 100902882 | T | 0.00708 |
| rs4928220  | 3 | 100962239 | T | 0.01570 |
| rs793474   | 3 | 101027070 | T | 0.00357 |
| rs6792339  | 3 | 101163597 | A | 0.01391 |
| rs2317335  | 3 | 102269706 | C | 0.00682 |
| rs3923609  | 3 | 102345291 | T | 0.00457 |
| rs11720464 | 3 | 103451607 | G | 0.01346 |
| rs16844885 | 3 | 103456100 | G | 0.01063 |
| rs7652417  | 3 | 104347530 | C | 0.01042 |
| rs2103355  | 3 | 105228554 | C | 0.00750 |
| rs1165905  | 3 | 105260479 | T | 0.01601 |
| rs2398993  | 3 | 105513929 | A | 0.00577 |
| rs9841288  | 3 | 105899251 | T | 0.00528 |
| rs2633702  | 3 | 105901394 | A | 0.00895 |
| rs10933805 | 3 | 106260663 | C | 0.00061 |
| rs10933810 | 3 | 106415848 | A | 0.00988 |
| rs4894936  | 3 | 106825705 | G | 0.00530 |
| rs2083948  | 3 | 106828663 | A | 0.01145 |
| rs9872358  | 3 | 107371754 | T | 0.00381 |
| rs7632189  | 3 | 107372793 | C | 0.00276 |
| rs1871274  | 3 | 107385166 | C | 0.01544 |
| rs13085623 | 3 | 107415425 | C | 0.00168 |
| rs7614488  | 3 | 107504190 | T | 0.00537 |
| rs16852418 | 3 | 107572763 | G | 0.00198 |
| rs17794090 | 3 | 107701395 | A | 0.00364 |
| rs4895039  | 3 | 108005925 | C | 0.00139 |
| rs2049118  | 3 | 108010714 | C | 0.01633 |



|            |   |           |   |         |
|------------|---|-----------|---|---------|
| rs1520717  | 3 | 108011334 | G | 0.01462 |
| rs1996694  | 3 | 108045770 | C | 0.00942 |
| rs709464   | 3 | 109192434 | A | 0.01243 |
| rs2715734  | 3 | 110180266 | G | 0.00786 |
| rs7637739  | 3 | 110198158 | A | 0.00328 |
| rs9865616  | 3 | 110343625 | T | 0.01185 |
| rs17305051 | 3 | 110444245 | T | 0.01525 |
| rs7611871  | 3 | 110510510 | A | 0.01068 |
| rs1125903  | 3 | 110568968 | A | 0.00582 |
| rs17807117 | 3 | 110751304 | G | 0.01211 |
| rs1533855  | 3 | 110771783 | C | 0.01281 |
| rs1729595  | 3 | 110782976 | A | 0.01403 |
| rs1729594  | 3 | 110783010 | G | 0.01472 |
| rs1729590  | 3 | 110785471 | T | 0.01577 |
| rs1729622  | 3 | 110807269 | C | 0.00699 |
| rs1729616  | 3 | 110814933 | G | 0.01549 |
| rs617108   | 3 | 111147941 | C | 0.00969 |
| rs11916299 | 3 | 111354514 | C | 0.00294 |
| rs10511281 | 3 | 111395314 | A | 0.00189 |
| rs1512512  | 3 | 111785929 | G | 0.01620 |
| rs1381835  | 3 | 112083286 | G | 0.00095 |
| rs16857885 | 3 | 112471474 | A | 0.00236 |
| rs1489024  | 3 | 112485064 | C | 0.00204 |
| rs13083225 | 3 | 112486553 | T | 0.01628 |
| rs17202754 | 3 | 112720470 | T | 0.00216 |
| rs4682298  | 3 | 112929749 | T | 0.00108 |
| rs17490973 | 3 | 113083848 | A | 0.00811 |
| rs17429033 | 3 | 113193088 | C | 0.00071 |
| rs13069887 | 3 | 113411650 | C | 0.01527 |
| rs4347976  | 3 | 113422075 | A | 0.00052 |
| rs4355254  | 3 | 113525909 | G | 7.67100 |
| rs6438068  | 3 | 113539624 | G | 0.01507 |
| rs9815819  | 3 | 113847817 | A | 4.21800 |
| rs1488189  | 3 | 114194061 | A | 0.00203 |
| rs10511319 | 3 | 114316388 | G | 0.00215 |
| rs16860868 | 3 | 114562639 | G | 0.00216 |
| rs2203251  | 3 | 114814925 | G | 0.01445 |
| rs16822416 | 3 | 115373000 | T | 0.00776 |
| rs16822478 | 3 | 115419430 | T | 0.00326 |
| rs1521067  | 3 | 115592268 | C | 0.01209 |
| rs9873283  | 3 | 116622209 | G | 0.01072 |
| rs283377   | 3 | 116889943 | G | 0.01495 |
| rs4476498  | 3 | 117142999 | T | 0.00768 |
| rs12638103 | 3 | 117944322 | G | 0.01444 |

|            |   |           |   |         |
|------------|---|-----------|---|---------|
| rs7426651  | 3 | 118017277 | T | 0.00763 |
| rs17720543 | 3 | 118726699 | T | 0.00520 |
| rs7645813  | 3 | 119127487 | C | 0.00298 |
| rs1350158  | 3 | 119143663 | T | 0.00857 |
| rs843853   | 3 | 119160491 | G | 0.01050 |
| rs16827961 | 3 | 119316088 | T | 0.01161 |
| rs2970136  | 3 | 119656825 | G | 0.00884 |
| rs2946824  | 3 | 119711211 | A | 0.00345 |
| rs12629898 | 3 | 120022936 | T | 0.01223 |
| rs962115   | 3 | 120082765 | A | 0.01570 |
| rs11712211 | 3 | 120986830 | G | 0.00369 |
| rs1403527  | 3 | 120989570 | A | 0.00716 |
| rs1259340  | 3 | 121708045 | T | 0.00631 |
| rs556346   | 3 | 122016954 | G | 0.01033 |
| rs936849   | 3 | 122018119 | A | 0.01653 |
| rs662467   | 3 | 122157217 | A | 0.00237 |
| rs9849118  | 3 | 122614958 | A | 0.01401 |
| rs13321798 | 3 | 123086261 | A | 0.01437 |
| rs1523517  | 3 | 123209681 | G | 0.00273 |
| rs7629297  | 3 | 124219868 | T | 0.01077 |
| rs1123613  | 3 | 124236663 | C | 0.01374 |
| rs2717225  | 3 | 124356613 | C | 0.00639 |
| rs9868971  | 3 | 124419559 | A | 0.01049 |
| rs12493729 | 3 | 124447590 | C | 0.01231 |
| rs16834431 | 3 | 124768546 | T | 0.00240 |
| rs6787049  | 3 | 125622819 | C | 0.00697 |
| rs963651   | 3 | 125639321 | T | 0.01635 |
| rs6763492  | 3 | 126184698 | T | 0.01278 |
| rs6795558  | 3 | 126204193 | G | 0.00280 |
| rs631691   | 3 | 126357868 | G | 0.00435 |
| rs7612285  | 3 | 126511050 | C | 0.01540 |
| rs9809356  | 3 | 126612179 | T | 0.01190 |
| rs7636858  | 3 | 126659411 | C | 0.00614 |
| rs7610077  | 3 | 126675824 | C | 0.00812 |
| rs777491   | 3 | 127647472 | G | 0.00526 |
| rs777496   | 3 | 127669194 | C | 0.00916 |
| rs12492352 | 3 | 127748015 | T | 0.01546 |
| rs7628650  | 3 | 127878787 | T | 0.01205 |
| rs17693752 | 3 | 127956000 | G | 0.01182 |
| rs9856036  | 3 | 128267154 | A | 0.01387 |
| rs9828776  | 3 | 128282770 | T | 0.00321 |
| rs6439067  | 3 | 128586530 | G | 0.00044 |
| rs1543272  | 3 | 129070913 | C | 0.00498 |
| rs11716941 | 3 | 129358064 | C | 0.00303 |

|            |   |           |   |         |
|------------|---|-----------|---|---------|
| rs9830294  | 3 | 129429478 | G | 0.00893 |
| rs2999061  | 3 | 129476313 | T | 0.00755 |
| rs7647218  | 3 | 130607921 | G | 0.01548 |
| rs9871734  | 3 | 131442289 | G | 0.00950 |
| rs9879726  | 3 | 131543730 | T | 0.01659 |
| rs903046   | 3 | 132237816 | C | 0.00833 |
| rs6794179  | 3 | 132263544 | T | 0.00672 |
| rs1389271  | 3 | 132267796 | G | 0.00869 |
| rs13094108 | 3 | 132303784 | T | 0.01433 |
| rs16835887 | 3 | 132313061 | G | 0.01168 |
| rs925779   | 3 | 132338545 | G | 0.00305 |
| rs1515909  | 3 | 132342177 | T | 0.01197 |
| rs2718860  | 3 | 132346904 | T | 0.01261 |
| rs6439277  | 3 | 132350485 | C | 0.00818 |
| rs10512802 | 3 | 132430699 | A | 0.01640 |
| rs6768031  | 3 | 132433837 | A | 0.01086 |
| rs16836261 | 3 | 132474804 | C | 0.01140 |
| rs1427835  | 3 | 132557020 | C | 0.00973 |
| rs16836493 | 3 | 132564794 | G | 0.00227 |
| rs9289396  | 3 | 132940779 | A | 0.01247 |
| rs1381083  | 3 | 133172286 | G | 0.00641 |
| rs7647029  | 3 | 133209412 | C | 0.01177 |
| rs1533748  | 3 | 133328673 | C | 0.00867 |
| rs1316655  | 3 | 133404646 | C | 0.01294 |
| rs1505829  | 3 | 133488808 | G | 0.01101 |
| rs10512870 | 3 | 134107012 | G | 0.00870 |
| rs17431810 | 3 | 134157013 | A | 0.00845 |
| rs9824252  | 3 | 134188001 | T | 0.00549 |
| rs9873398  | 3 | 134207602 | A | 0.00924 |
| rs1013391  | 3 | 134208053 | C | 0.01119 |
| rs6763815  | 3 | 134208565 | G | 0.00905 |
| rs6439381  | 3 | 134219072 | C | 0.00643 |
| rs2369967  | 3 | 134227201 | C | 0.00350 |
| rs1464403  | 3 | 134234389 | T | 0.01537 |
| rs7633217  | 3 | 134238872 | G | 0.01644 |
| rs1568478  | 3 | 134243117 | T | 0.01224 |
| rs4854680  | 3 | 134245860 | T | 0.01636 |
| rs7631593  | 3 | 134250282 | T | 0.01367 |
| rs2049149  | 3 | 134259591 | A | 0.01232 |
| rs4496483  | 3 | 134273376 | T | 0.00530 |
| rs2369970  | 3 | 134280489 | T | 0.00256 |
| rs7638408  | 3 | 134398428 | G | 0.01603 |
| rs7624858  | 3 | 134466807 | T | 0.00497 |
| rs2715632  | 3 | 134968520 | A | 0.00029 |

|            |   |           |   |         |
|------------|---|-----------|---|---------|
| rs2692682  | 3 | 135077381 | T | 0.00379 |
| rs2400279  | 3 | 135555339 | G | 0.00169 |
| rs2400273  | 3 | 135589184 | G | 0.00503 |
| rs6764764  | 3 | 135813857 | T | 0.00914 |
| rs9289483  | 3 | 135920645 | G | 0.01235 |
| rs36178    | 3 | 136129859 | A | 0.00168 |
| rs39704    | 3 | 136129897 | T | 0.00062 |
| rs4955459  | 3 | 136150839 | A | 0.00465 |
| rs7644369  | 3 | 136153214 | A | 0.00214 |
| rs6801065  | 3 | 136336932 | A | 0.00348 |
| rs6439571  | 3 | 136719742 | T | 0.00932 |
| rs6439578  | 3 | 136763460 | T | 0.01329 |
| rs7621220  | 3 | 136763883 | A | 0.00099 |
| rs12629207 | 3 | 138328949 | A | 0.01607 |
| rs10222397 | 3 | 138570477 | C | 0.00205 |
| rs4678337  | 3 | 138638963 | A | 0.01656 |
| rs17547056 | 3 | 138910369 | G | 0.01322 |
| rs2170309  | 3 | 139325796 | A | 0.01325 |
| rs10935355 | 3 | 141026416 | T | 0.01430 |
| rs6439890  | 3 | 141207949 | C | 0.00701 |
| rs4683805  | 3 | 141327143 | T | 0.00201 |
| rs1026780  | 3 | 141571971 | G | 0.01190 |
| rs13099847 | 3 | 141580008 | C | 0.01493 |
| rs4683499  | 3 | 141662920 | C | 0.01410 |
| rs349504   | 3 | 141712135 | G | 0.00068 |
| rs347973   | 3 | 141775226 | A | 0.00833 |
| rs16850633 | 3 | 141798405 | G | 0.01349 |
| rs1499876  | 3 | 141813475 | T | 0.00061 |
| rs1696201  | 3 | 141835923 | T | 0.01558 |
| rs9881950  | 3 | 141863447 | A | 0.01025 |
| rs698666   | 3 | 141881767 | A | 0.00939 |
| rs3913019  | 3 | 141886682 | A | 0.00614 |
| rs4683516  | 3 | 141890495 | C | 0.01227 |
| rs7632807  | 3 | 141968133 | G | 0.00772 |
| rs1519195  | 3 | 142072703 | G | 0.00711 |
| rs10935417 | 3 | 142268524 | T | 0.01205 |
| rs9823690  | 3 | 142273269 | T | 0.01616 |
| rs967526   | 3 | 142428375 | C | 0.01329 |
| rs1877223  | 3 | 142480315 | C | 0.01027 |
| rs4365602  | 3 | 142869717 | G | 0.00085 |
| rs2138789  | 3 | 142991441 | A | 0.01450 |
| rs6440043  | 3 | 143072195 | A | 0.00364 |
| rs41465652 | 3 | 144923216 | G | 0.01245 |
| rs1349001  | 3 | 144965563 | C | 0.00929 |

|            |   |           |   |         |
|------------|---|-----------|---|---------|
| rs1868179  | 3 | 144988258 | T | 0.01593 |
| rs17602500 | 3 | 145148707 | C | 0.00206 |
| rs6778627  | 3 | 145203559 | T | 4.11800 |
| rs4527375  | 3 | 145218205 | T | 0.01517 |
| rs4613453  | 3 | 145218290 | C | 0.01053 |
| rs7611326  | 3 | 145219064 | C | 0.01587 |
| rs1025984  | 3 | 145238877 | G | 0.00113 |
| rs1530477  | 3 | 145302196 | G | 0.00441 |
| rs6440311  | 3 | 146286421 | C | 0.01133 |
| rs13091557 | 3 | 146711304 | G | 0.01394 |
| rs4470459  | 3 | 146721568 | G | 0.01213 |
| rs6792834  | 3 | 146736032 | A | 0.00318 |
| rs3863992  | 3 | 146940876 | A | 0.01591 |
| rs9828457  | 3 | 147082910 | T | 0.01434 |
| rs342899   | 3 | 147761306 | T | 0.01516 |
| rs6440455  | 3 | 147947303 | G | 0.01446 |
| rs1521580  | 3 | 148004668 | G | 0.00389 |
| rs10513290 | 3 | 148043457 | G | 0.01545 |
| rs10935684 | 3 | 149238020 | T | 0.01620 |
| rs16860056 | 3 | 149257720 | T | 0.01217 |
| rs6440527  | 3 | 149258559 | A | 0.01210 |
| rs1522950  | 3 | 149740904 | G | 0.01358 |
| rs275690   | 3 | 149828216 | C | 0.01073 |
| rs11712763 | 3 | 150143157 | T | 0.00131 |
| rs13072463 | 3 | 150456155 | G | 0.00240 |
| rs12489083 | 3 | 151256898 | C | 0.01619 |
| rs1564996  | 3 | 151306814 | T | 0.01504 |
| rs7627651  | 3 | 151404775 | C | 0.00206 |
| rs6769917  | 3 | 151992294 | T | 0.00125 |
| rs41454348 | 3 | 151998413 | A | 0.01415 |
| rs16863323 | 3 | 152542758 | C | 0.01032 |
| rs2120982  | 3 | 153012811 | T | 0.00952 |
| rs9854676  | 3 | 153375537 | C | 0.01521 |
| rs6771162  | 3 | 153721985 | T | 0.01216 |
| rs9869338  | 3 | 154226863 | G | 0.01359 |
| rs16822398 | 3 | 154351388 | A | 0.01065 |
| rs7622713  | 3 | 154615362 | T | 0.01062 |
| rs3846073  | 3 | 154798092 | A | 0.00683 |
| rs16822807 | 3 | 154803470 | G | 0.01453 |
| rs17744338 | 3 | 154872187 | A | 0.00704 |
| rs522654   | 3 | 154948599 | A | 0.01459 |
| rs9850368  | 3 | 154960783 | C | 0.01194 |
| rs1521302  | 3 | 155153228 | C | 0.00873 |
| rs16846891 | 3 | 155218309 | T | 0.01475 |

|            |   |           |   |         |
|------------|---|-----------|---|---------|
| rs13080908 | 3 | 155577580 | C | 0.00135 |
| rs3796270  | 3 | 156504521 | A | 0.00021 |
| rs4561871  | 3 | 156556033 | G | 0.01201 |
| rs3924188  | 3 | 156561704 | C | 0.00299 |
| rs10212156 | 3 | 156586078 | A | 0.00094 |
| rs816546   | 3 | 157630062 | G | 0.00863 |
| rs344001   | 3 | 157936101 | C | 0.01323 |
| rs6776647  | 3 | 158470389 | T | 0.01649 |
| rs7645454  | 3 | 158507639 | G | 0.00151 |
| rs827173   | 3 | 159442224 | C | 0.00507 |
| rs9846998  | 3 | 160035056 | C | 0.00697 |
| rs1503107  | 3 | 160095853 | C | 0.01513 |
| rs2595244  | 3 | 160489729 | C | 0.00849 |
| rs1349165  | 3 | 160526956 | C | 0.00057 |
| rs1349166  | 3 | 160526972 | C | 0.01234 |
| rs13075534 | 3 | 160968833 | C | 0.00468 |
| rs1497762  | 3 | 161001612 | G | 0.00906 |
| rs7631400  | 3 | 161011416 | A | 0.00244 |
| rs16831289 | 3 | 161807157 | G | 0.01276 |
| rs1378665  | 3 | 161887729 | T | 0.00027 |
| rs6441408  | 3 | 163063420 | T | 0.01258 |
| rs1510336  | 3 | 163325002 | A | 0.00634 |
| rs9290197  | 3 | 164227902 | T | 0.00324 |
| rs1375846  | 3 | 165313941 | A | 0.00405 |
| rs1375832  | 3 | 165319181 | C | 0.00361 |
| rs1349285  | 3 | 165341254 | A | 0.00951 |
| rs10936408 | 3 | 165353361 | A | 0.00573 |
| rs12495540 | 3 | 165377741 | A | 0.00416 |
| rs1016369  | 3 | 165881550 | T | 0.00044 |
| rs13315478 | 3 | 166514051 | C | 0.00216 |
| rs865499   | 3 | 166929651 | G | 0.01500 |
| rs3894957  | 3 | 166952603 | G | 0.01193 |
| rs9873779  | 3 | 166990796 | C | 0.01022 |
| rs2089885  | 3 | 166991935 | T | 0.00791 |
| rs2312708  | 3 | 167216994 | G | 0.01230 |
| rs4680618  | 3 | 167349698 | C | 0.01562 |
| rs2862806  | 3 | 167452241 | T | 0.01324 |
| rs4274741  | 3 | 168786179 | A | 0.00561 |
| rs9829009  | 3 | 168847165 | T | 0.01082 |
| rs2686586  | 3 | 169380515 | C | 0.01324 |
| rs17462877 | 3 | 170169342 | G | 0.00383 |
| rs9823691  | 3 | 170273620 | C | 0.01070 |
| rs16853226 | 3 | 170336587 | G | 0.00119 |
| rs1273882  | 3 | 170602176 | A | 0.01470 |

|            |   |           |   |         |
|------------|---|-----------|---|---------|
| rs17485347 | 3 | 170610213 | A | 0.00854 |
| rs10936601 | 3 | 171011143 | A | 0.01138 |
| rs6793160  | 3 | 171017960 | C | 0.00433 |
| rs16854658 | 3 | 171157100 | G | 0.00438 |
| rs1990805  | 3 | 171672199 | T | 0.00821 |
| rs12496334 | 3 | 171793139 | C | 0.00423 |
| rs17289591 | 3 | 171815244 | C | 0.01238 |
| rs11919564 | 3 | 172068102 | T | 0.00359 |
| rs16855789 | 3 | 172294361 | A | 0.00513 |
| rs12486611 | 3 | 172294982 | A | 0.00713 |
| rs6789594  | 3 | 172434897 | G | 0.01256 |
| rs931498   | 3 | 172556310 | G | 0.01516 |
| rs11716511 | 3 | 172590323 | T | 0.00520 |
| rs181715   | 3 | 172791538 | T | 0.00066 |
| rs7633686  | 3 | 172963579 | G | 0.01489 |
| rs9848640  | 3 | 173027942 | C | 0.00666 |
| rs6781921  | 3 | 173230050 | G | 0.00308 |
| rs7625921  | 3 | 173448323 | G | 0.00505 |
| rs11924521 | 3 | 174059775 | T | 0.00364 |
| rs12639277 | 3 | 174169855 | T | 0.00164 |
| rs11916259 | 3 | 174832272 | C | 0.00756 |
| rs16828950 | 3 | 174845059 | A | 0.00583 |
| rs1352416  | 3 | 174963401 | G | 0.00369 |
| rs9829309  | 3 | 175036477 | G | 0.00709 |
| rs6779415  | 3 | 175046630 | T | 0.00314 |
| rs12632079 | 3 | 175619121 | C | 0.00686 |
| rs12637543 | 3 | 175619311 | T | 0.00163 |
| rs507227   | 3 | 175968504 | C | 0.01456 |
| rs500999   | 3 | 175978617 | C | 0.01435 |
| rs9863905  | 3 | 176214706 | T | 0.00426 |
| rs9863038  | 3 | 176220123 | T | 0.01428 |
| rs9831769  | 3 | 176238845 | A | 0.01530 |
| rs2193849  | 3 | 176601359 | A | 0.00166 |
| rs16825963 | 3 | 176764272 | A | 0.00806 |
| rs6800441  | 3 | 177560665 | A | 0.00741 |
| rs963028   | 3 | 177600896 | G | 0.01160 |
| rs16827475 | 3 | 177986109 | G | 0.00845 |
| rs2862702  | 3 | 178385355 | T | 0.01240 |
| rs10513755 | 3 | 178598500 | G | 0.01097 |
| rs6798789  | 3 | 178904969 | G | 0.00162 |
| rs1499810  | 3 | 178908229 | G | 0.01023 |
| rs4857726  | 3 | 178914424 | T | 0.01032 |
| rs11920864 | 3 | 180292559 | A | 0.01410 |
| rs6777944  | 3 | 180965720 | C | 0.00779 |

|            |   |           |   |         |
|------------|---|-----------|---|---------|
| rs2339913  | 3 | 181049917 | A | 0.00556 |
| rs6443681  | 3 | 181149751 | A | 0.00867 |
| rs1608796  | 3 | 181445006 | C | 0.01643 |
| rs3906013  | 3 | 181464665 | A | 0.01178 |
| rs7629793  | 3 | 181588372 | G | 0.01567 |
| rs1497891  | 3 | 181664718 | T | 0.01348 |
| rs904241   | 3 | 181747437 | C | 0.00851 |
| rs6791597  | 3 | 181781172 | A | 0.00580 |
| rs1532485  | 3 | 181802675 | T | 0.00042 |
| rs7426901  | 3 | 182844006 | C | 0.00504 |
| rs17237063 | 3 | 183617208 | G | 0.00879 |
| rs6788905  | 3 | 183980377 | C | 0.00353 |
| rs9878953  | 3 | 183981452 | G | 0.01628 |
| rs7632904  | 3 | 184265795 | G | 0.01220 |
| rs4859184  | 3 | 184611932 | C | 0.00471 |
| rs2971460  | 3 | 184677420 | T | 0.01408 |
| rs9870374  | 3 | 184777093 | G | 0.01480 |
| rs7371826  | 3 | 185402644 | T | 0.01627 |
| rs747877   | 3 | 185939772 | C | 0.00073 |
| rs6788431  | 3 | 186117711 | G | 0.01117 |
| rs4686948  | 3 | 186201847 | T | 0.00315 |
| rs16859737 | 3 | 186373195 | T | 0.00810 |
| rs7431357  | 3 | 186514488 | T | 0.01626 |
| rs12163582 | 3 | 186584193 | T | 0.01520 |
| rs9863611  | 3 | 186839849 | T | 0.01040 |
| rs9844015  | 3 | 187220323 | T | 0.00009 |
| rs1558910  | 3 | 187439841 | G | 0.01306 |
| rs2193587  | 3 | 187472790 | G | 0.00561 |
| rs9872857  | 3 | 187690256 | T | 0.00495 |
| rs2070635  | 3 | 187818870 | T | 0.00461 |
| rs1624569  | 3 | 187932763 | A | 0.01233 |
| rs266764   | 3 | 187946650 | G | 0.01487 |
| rs13322676 | 3 | 188201439 | T | 0.01458 |
| rs3872724  | 3 | 188223915 | C | 0.01617 |
| rs2102860  | 3 | 188593677 | A | 0.00944 |
| rs2687926  | 3 | 188636560 | C | 0.01261 |
| rs9830704  | 3 | 188705061 | G | 0.00880 |
| rs6774087  | 3 | 188716825 | T | 0.00372 |
| rs10937312 | 3 | 188802383 | C | 0.00260 |
| rs17728902 | 3 | 188873838 | C | 0.00696 |
| rs6762932  | 3 | 188931691 | A | 0.01268 |
| rs16848772 | 3 | 189258293 | C | 0.00087 |
| rs4686952  | 3 | 189531536 | A | 0.00503 |
| rs4686967  | 3 | 189705675 | G | 0.01129 |



|            |   |           |   |         |
|------------|---|-----------|---|---------|
| rs17429491 | 3 | 190732822 | T | 0.01181 |
| rs1364596  | 3 | 190743319 | G | 0.00780 |
| rs3846096  | 3 | 190764506 | G | 0.00515 |
| rs1881990  | 3 | 190823284 | G | 0.00336 |
| rs6776687  | 3 | 190881091 | A | 0.00668 |
| rs4687094  | 3 | 191011546 | A | 0.00382 |
| rs41396746 | 3 | 191206191 | G | 0.00940 |
| rs9834518  | 3 | 191217916 | T | 0.00444 |
| rs7632740  | 3 | 191253292 | G | 0.00774 |
| rs1403414  | 3 | 191273841 | G | 0.00117 |
| rs1522930  | 3 | 191280803 | C | 0.01026 |
| rs1436656  | 3 | 191431383 | T | 0.00908 |
| rs2378568  | 3 | 191462419 | T | 0.00446 |
| rs17427594 | 3 | 191467837 | T | 0.01334 |
| rs9837705  | 3 | 191473777 | C | 0.00467 |
| rs3774028  | 3 | 191510966 | A | 0.00273 |
| rs3773983  | 3 | 191762560 | T | 0.00152 |
| rs6807826  | 3 | 192205117 | T | 0.01597 |
| rs6793796  | 3 | 193459773 | G | 0.00393 |
| rs4687304  | 3 | 193461726 | A | 0.01626 |
| rs6798854  | 3 | 193536935 | A | 0.00357 |
| rs6444640  | 3 | 193632921 | C | 0.01623 |
| rs2135189  | 3 | 193933600 | T | 0.00466 |
| rs2173796  | 3 | 194970765 | G | 0.00820 |
| rs2636914  | 3 | 195136231 | C | 0.00981 |
| rs6444755  | 3 | 195150211 | T | 0.01154 |
| rs2636909  | 3 | 195150527 | G | 0.01520 |
| rs4076187  | 3 | 195400624 | T | 0.00896 |
| rs1466733  | 3 | 195602287 | C | 0.00568 |
| rs6437390  | 3 | 195776040 | C | 0.01020 |
| rs823009   | 3 | 196155403 | A | 0.00088 |
| rs2046969  | 3 | 197132905 | C | 0.00542 |
| rs433811   | 3 | 198501197 | C | 0.00073 |
| rs9859281  | 3 | 198797165 | G | 0.01065 |
| rs9842166  | 3 | 198797230 | T | 0.00477 |
| rs2082270  | 3 | 198799512 | C | 0.00811 |
| rs7613131  | 3 | 198812273 | G | 0.00674 |
| rs12107047 | 3 | 198931284 | C | 0.01376 |
| rs3775110  | 4 | 1152022   | G | 0.01601 |
| rs798754   | 4 | 1690555   | A | 0.00938 |
| rs382441   | 4 | 1978893   | C | 0.01315 |
| rs554222   | 4 | 2124815   | A | 0.01326 |
| rs10488836 | 4 | 2130692   | T | 0.00602 |
| rs6599427  | 4 | 2314490   | T | 0.00407 |

|            |   |          |   |         |
|------------|---|----------|---|---------|
| rs704352   | 4 | 2456284  | A | 0.00049 |
| rs11945928 | 4 | 2663879  | T | 0.01176 |
| rs4690002  | 4 | 2811038  | T | 0.01469 |
| rs3025838  | 4 | 3131244  | A | 0.00026 |
| rs41347150 | 4 | 3279182  | C | 0.01287 |
| rs1188582  | 4 | 3556038  | A | 0.01089 |
| rs4348044  | 4 | 4903768  | G | 0.01317 |
| rs7699934  | 4 | 5021633  | C | 0.01180 |
| rs6817353  | 4 | 5292472  | C | 0.00332 |
| rs16837064 | 4 | 5434203  | C | 0.01349 |
| rs10937641 | 4 | 5435157  | G | 0.01467 |
| rs16837127 | 4 | 5449613  | C | 0.01351 |
| rs16837389 | 4 | 5587211  | T | 0.01159 |
| rs2291157  | 4 | 5771922  | C | 0.01276 |
| rs10937678 | 4 | 5848389  | T | 0.00483 |
| rs3821936  | 4 | 5880158  | T | 0.01087 |
| rs13107008 | 4 | 6012896  | C | 0.00899 |
| rs4689318  | 4 | 6069792  | C | 0.00528 |
| rs6812643  | 4 | 6203072  | G | 0.00902 |
| rs16838645 | 4 | 6421256  | G | 0.01067 |
| rs10013211 | 4 | 7058979  | A | 0.00296 |
| rs11931598 | 4 | 7098003  | A | 0.01613 |
| rs731634   | 4 | 7511247  | A | 0.01490 |
| rs7675528  | 4 | 7514665  | T | 0.00643 |
| rs17368264 | 4 | 7666095  | C | 0.00082 |
| rs6837688  | 4 | 7685720  | G | 0.00080 |
| rs1574414  | 4 | 8100956  | G | 0.01440 |
| rs1298472  | 4 | 8253741  | T | 0.00378 |
| rs9985550  | 4 | 8340707  | G | 0.01289 |
| rs4270574  | 4 | 8366130  | G | 0.00695 |
| rs10939507 | 4 | 9377921  | A | 0.00512 |
| rs11934363 | 4 | 9521199  | C | 0.00209 |
| rs6826764  | 4 | 9639892  | G | 0.00307 |
| rs10516201 | 4 | 9733039  | G | 0.00903 |
| rs4444830  | 4 | 9733917  | G | 0.00463 |
| rs4697718  | 4 | 9783237  | A | 0.00721 |
| rs4697727  | 4 | 9797020  | A | 0.01445 |
| rs6826450  | 4 | 9817876  | G | 0.00443 |
| rs6855489  | 4 | 9817986  | A | 0.00452 |
| rs7692559  | 4 | 9899824  | A | 0.00440 |
| rs17477561 | 4 | 9924194  | G | 0.01345 |
| rs11736056 | 4 | 10562494 | T | 0.01491 |
| rs11736131 | 4 | 10571494 | A | 0.00381 |
| rs10025796 | 4 | 10582659 | A | 0.00606 |

|            |   |          |   |         |
|------------|---|----------|---|---------|
| rs2128863  | 4 | 10611626 | T | 0.01416 |
| rs2869765  | 4 | 10617880 | A | 0.01014 |
| rs7681347  | 4 | 10687755 | C | 0.00114 |
| rs7685923  | 4 | 10691247 | A | 0.01648 |
| rs4697838  | 4 | 10701650 | A | 0.00412 |
| rs4697839  | 4 | 10701939 | G | 0.01565 |
| rs16878217 | 4 | 10728210 | G | 0.01046 |
| rs16878245 | 4 | 10730190 | A | 0.01077 |
| rs7659670  | 4 | 10784850 | T | 0.01037 |
| rs1358440  | 4 | 10884659 | C | 0.01405 |
| rs10488990 | 4 | 11216599 | G | 0.00174 |
| rs2108955  | 4 | 11219566 | A | 0.00756 |
| rs1563254  | 4 | 11837504 | T | 0.01632 |
| rs1481186  | 4 | 12156813 | T | 0.00396 |
| rs2711550  | 4 | 12450280 | C | 0.00510 |
| rs1913706  | 4 | 12647728 | T | 0.00693 |
| rs481266   | 4 | 12666968 | T | 0.00326 |
| rs497117   | 4 | 12691442 | G | 0.01285 |
| rs6857769  | 4 | 12861246 | G | 0.01243 |
| rs1157946  | 4 | 13143506 | A | 0.01451 |
| rs7671621  | 4 | 13337604 | G | 0.01162 |
| rs10001856 | 4 | 13480160 | A | 0.00670 |
| rs1629359  | 4 | 13574822 | C | 0.01179 |
| rs6818005  | 4 | 13766514 | T | 0.01316 |
| rs218815   | 4 | 14075895 | C | 0.00523 |
| rs10016726 | 4 | 14342870 | C | 0.00949 |
| rs4577573  | 4 | 14360658 | C | 0.00835 |
| rs4502675  | 4 | 14391557 | T | 0.01429 |
| rs12502866 | 4 | 14399576 | C | 0.00673 |
| rs6449211  | 4 | 15607568 | T | 0.00296 |
| rs7657627  | 4 | 16021149 | G | 0.00183 |
| rs955943   | 4 | 16123506 | G | 0.01347 |
| rs1496742  | 4 | 16217775 | A | 0.00147 |
| rs1483007  | 4 | 16468140 | C | 0.00401 |
| rs6858723  | 4 | 16711264 | T | 0.00119 |
| rs1450669  | 4 | 17078540 | A | 0.00811 |
| rs3796809  | 4 | 17112937 | T | 0.01575 |
| rs13103430 | 4 | 17176453 | A | 0.00725 |
| rs4698629  | 4 | 17217982 | G | 0.00683 |
| rs4698634  | 4 | 17239290 | A | 0.00717 |
| rs16896068 | 4 | 17553938 | T | 0.01056 |
| rs1553460  | 4 | 17804959 | A | 0.01516 |
| rs13147572 | 4 | 17902242 | G | 0.00093 |
| rs1382092  | 4 | 18091669 | C | 0.00086 |

|            |   |          |   |         |
|------------|---|----------|---|---------|
| rs10025598 | 4 | 18389690 | T | 0.00646 |
| rs16897607 | 4 | 18411898 | G | 0.01180 |
| rs6449420  | 4 | 18415983 | A | 0.00359 |
| rs1914604  | 4 | 18460046 | T | 0.01227 |
| rs17534953 | 4 | 18580389 | A | 0.00199 |
| rs16898029 | 4 | 18656715 | T | 0.00834 |
| rs312352   | 4 | 18871602 | G | 0.00015 |
| rs13117987 | 4 | 18898037 | A | 0.01180 |
| rs9995581  | 4 | 19054034 | A | 0.00687 |
| rs4440215  | 4 | 19115959 | A | 0.01401 |
| rs4577579  | 4 | 19118623 | C | 0.01279 |
| rs4642242  | 4 | 19164533 | A | 0.00951 |
| rs11734810 | 4 | 19190933 | C | 0.01297 |
| rs16868634 | 4 | 19203653 | T | 0.01445 |
| rs1032258  | 4 | 19216491 | T | 0.01591 |
| rs41532447 | 4 | 19525054 | A | 0.00135 |
| rs1026973  | 4 | 19621253 | C | 0.00146 |
| rs2062396  | 4 | 19700052 | C | 0.00112 |
| rs10516349 | 4 | 19895577 | T | 0.00401 |
| rs17609702 | 4 | 20034686 | A | 0.00593 |
| rs6841111  | 4 | 20537595 | T | 0.00631 |
| rs6817687  | 4 | 20694428 | A | 0.01118 |
| rs4599408  | 4 | 20697443 | A | 0.01631 |
| rs16870439 | 4 | 20747254 | A | 0.00486 |
| rs6829666  | 4 | 20766579 | T | 0.00749 |
| rs1836087  | 4 | 20781183 | T | 0.01523 |
| rs6821250  | 4 | 20781282 | T | 0.01582 |
| rs1319225  | 4 | 20790093 | C | 0.00849 |
| rs16870621 | 4 | 20853990 | T | 0.01138 |
| rs2323071  | 4 | 21237808 | T | 0.00645 |
| rs1380272  | 4 | 21364804 | T | 0.00088 |
| rs10938922 | 4 | 22442615 | G | 0.01142 |
| rs615604   | 4 | 23597866 | C | 0.00623 |
| rs16875034 | 4 | 23722172 | A | 0.01342 |
| rs11721883 | 4 | 24006774 | G | 0.01585 |
| rs800453   | 4 | 24427607 | G | 0.00991 |
| rs13131918 | 4 | 24482702 | G | 0.00024 |
| rs4697489  | 4 | 24495197 | C | 0.01420 |
| rs10020414 | 4 | 25394544 | A | 0.01515 |
| rs6841440  | 4 | 25654795 | A | 0.00832 |
| rs7684555  | 4 | 25655054 | G | 0.01614 |
| rs2137231  | 4 | 25657239 | A | 0.00957 |
| rs6825740  | 4 | 25847772 | T | 0.00876 |
| rs6821126  | 4 | 25951636 | T | 0.00637 |

|            |   |          |   |         |
|------------|---|----------|---|---------|
| rs2153155  | 4 | 25966991 | C | 0.00983 |
| rs13134710 | 4 | 26051306 | C | 0.01543 |
| rs10939139 | 4 | 26458873 | T | 0.00744 |
| rs7660174  | 4 | 26461536 | A | 0.00435 |
| rs7671671  | 4 | 26462750 | A | 0.01085 |
| rs10032186 | 4 | 26571971 | A | 0.00457 |
| rs2075093  | 4 | 26706794 | G | 0.00036 |
| rs7669710  | 4 | 26982314 | A | 0.01149 |
| rs13125312 | 4 | 27037573 | T | 0.01454 |
| rs210775   | 4 | 27040647 | A | 0.01432 |
| rs297291   | 4 | 27280901 | A | 0.00182 |
| rs7439266  | 4 | 27290532 | A | 0.00455 |
| rs2036184  | 4 | 27954873 | G | 0.00788 |
| rs1567492  | 4 | 28151604 | G | 0.00267 |
| rs2458628  | 4 | 28188118 | T | 0.00754 |
| rs2101697  | 4 | 28261899 | A | 0.01224 |
| rs12639959 | 4 | 28749027 | G | 0.01571 |
| rs2310033  | 4 | 29050829 | G | 0.01484 |
| rs1816773  | 4 | 29257846 | G | 0.01598 |
| rs6448704  | 4 | 29986062 | C | 0.00135 |
| rs2203140  | 4 | 30045586 | C | 0.01217 |
| rs1588610  | 4 | 30118029 | G | 0.01622 |
| rs10031821 | 4 | 30131509 | T | 0.00837 |
| rs1818442  | 4 | 30142909 | C | 0.01108 |
| rs767478   | 4 | 30239480 | T | 0.00535 |
| rs10010739 | 4 | 30713894 | T | 0.01025 |
| rs10014802 | 4 | 31757023 | C | 0.00671 |
| rs11133180 | 4 | 31773932 | C | 0.01112 |
| rs1118106  | 4 | 31825250 | C | 0.00029 |
| rs17080898 | 4 | 31838839 | G | 0.01575 |
| rs17080915 | 4 | 31845118 | C | 0.00239 |
| rs17299248 | 4 | 31845304 | A | 0.01097 |
| rs902658   | 4 | 31864983 | G | 0.01156 |
| rs2404759  | 4 | 31865170 | C | 0.01551 |
| rs2166280  | 4 | 32148566 | A | 0.01346 |
| rs11933744 | 4 | 32224652 | T | 0.00074 |
| rs9306915  | 4 | 32706365 | A | 0.01393 |
| rs9990848  | 4 | 32739241 | A | 0.00907 |
| rs28577134 | 4 | 32742832 | G | 0.00509 |
| rs2337724  | 4 | 33025184 | A | 0.01340 |
| rs41385647 | 4 | 33629567 | C | 0.00772 |
| rs1425509  | 4 | 34083700 | G | 0.01275 |
| rs16990031 | 4 | 34263988 | T | 0.00038 |
| rs16990131 | 4 | 34349710 | T | 0.00241 |

|            |   |          |   |         |
|------------|---|----------|---|---------|
| rs1511859  | 4 | 34392989 | A | 0.00569 |
| rs1399125  | 4 | 35169074 | G | 0.00223 |
| rs16992647 | 4 | 36489500 | A | 0.00636 |
| rs13144081 | 4 | 36786141 | C | 0.01432 |
| rs1342993  | 4 | 36864308 | C | 0.00267 |
| rs11723214 | 4 | 36890057 | G | 0.01469 |
| rs17495047 | 4 | 37290325 | A | 0.00848 |
| rs961082   | 4 | 37404017 | T | 0.01430 |
| rs933820   | 4 | 37702617 | C | 0.01172 |
| rs6820715  | 4 | 37708185 | T | 0.01661 |
| rs10018836 | 4 | 37708322 | C | 0.01247 |
| rs959694   | 4 | 37728590 | C | 0.01238 |
| rs932008   | 4 | 37870842 | C | 0.00297 |
| rs7662014  | 4 | 38261989 | C | 0.01247 |
| rs2130296  | 4 | 38551197 | A | 0.01319 |
| rs6846248  | 4 | 39673099 | A | 0.01109 |
| rs11729556 | 4 | 39904066 | T | 0.00584 |
| rs13140765 | 4 | 40143879 | T | 0.01188 |
| rs278985   | 4 | 40189349 | G | 0.01408 |
| rs10026397 | 4 | 41260644 | G | 0.01187 |
| rs10028962 | 4 | 41466901 | T | 0.00706 |
| rs16853711 | 4 | 41571982 | C | 0.00518 |
| rs7691499  | 4 | 41899928 | A | 0.01368 |
| rs2632689  | 4 | 42020972 | C | 0.01387 |
| rs1565113  | 4 | 42038947 | A | 0.01229 |
| rs2632698  | 4 | 42052652 | T | 0.01470 |
| rs2719949  | 4 | 42052845 | T | 0.01642 |
| rs1386617  | 4 | 42077641 | C | 0.01622 |
| rs2719950  | 4 | 42081595 | A | 0.00317 |
| rs2719959  | 4 | 42086461 | A | 0.01542 |
| rs17447926 | 4 | 42304221 | A | 3.46800 |
| rs35487523 | 4 | 42304596 | A | 0.01026 |
| rs7682119  | 4 | 42911451 | G | 0.01019 |
| rs10517072 | 4 | 42975400 | C | 0.00986 |
| rs41445444 | 4 | 44059525 | C | 0.00216 |
| rs2048545  | 4 | 44781944 | C | 0.00683 |
| rs7663667  | 4 | 44792234 | C | 0.00592 |
| rs1566857  | 4 | 45743637 | T | 0.00214 |
| rs904154   | 4 | 45821128 | C | 0.00849 |
| rs17600511 | 4 | 47062277 | G | 0.01084 |
| rs4435723  | 4 | 47162314 | C | 0.00201 |
| rs9654081  | 4 | 47192237 | A | 0.00469 |
| rs10002498 | 4 | 47623342 | G | 0.00292 |
| rs6850108  | 4 | 47773350 | A | 0.01174 |

|            |   |          |   |         |
|------------|---|----------|---|---------|
| rs10007288 | 4 | 47784892 | T | 0.01243 |
| rs11725773 | 4 | 47891092 | A | 0.00739 |
| rs6554072  | 4 | 53774304 | C | 0.00990 |
| rs9999406  | 4 | 54076102 | C | 0.00988 |
| rs17717891 | 4 | 54144358 | T | 0.00832 |
| rs2616410  | 4 | 54166224 | A | 0.01560 |
| rs1547905  | 4 | 54841511 | A | 0.00313 |
| rs13434995 | 4 | 56161971 | A | 0.00341 |
| rs7681714  | 4 | 56645695 | G | 0.00614 |
| rs4419531  | 4 | 57152997 | C | 0.01292 |
| rs7694092  | 4 | 57283745 | T | 0.01004 |
| rs1277307  | 4 | 57591456 | T | 0.01559 |
| rs1524690  | 4 | 57867216 | G | 0.00622 |
| rs839021   | 4 | 57984406 | T | 0.00338 |
| rs17088338 | 4 | 58101890 | T | 0.00277 |
| rs7683304  | 4 | 58166025 | A | 0.01343 |
| rs269847   | 4 | 58552567 | A | 0.01164 |
| rs6554508  | 4 | 58567272 | T | 0.00553 |
| rs2660950  | 4 | 58651643 | A | 0.00766 |
| rs17827094 | 4 | 58669544 | A | 0.01018 |
| rs17827100 | 4 | 58669628 | T | 0.00284 |
| rs2412904  | 4 | 58974596 | T | 0.00040 |
| rs1463171  | 4 | 59420217 | G | 0.01004 |
| rs2036098  | 4 | 59599269 | A | 0.00116 |
| rs17290730 | 4 | 60039439 | G | 0.00212 |
| rs6551526  | 4 | 60724394 | T | 0.01469 |
| rs11946495 | 4 | 60920756 | G | 0.00311 |
| rs10517505 | 4 | 61028567 | T | 0.00967 |
| rs11724820 | 4 | 61100834 | A | 0.00983 |
| rs4527515  | 4 | 61294721 | A | 0.01209 |
| rs17090347 | 4 | 61600493 | A | 0.00472 |
| rs2342541  | 4 | 61677829 | A | 0.00851 |
| rs6842293  | 4 | 62376020 | A | 0.00717 |
| rs5010235  | 4 | 62417220 | G | 0.01587 |
| rs10020948 | 4 | 62449692 | T | 0.00407 |
| rs17292142 | 4 | 62536118 | T | 0.01370 |
| rs954645   | 4 | 62542106 | C | 0.01215 |
| rs2193121  | 4 | 62679165 | T | 0.00432 |
| rs2015977  | 4 | 62765958 | G | 0.00039 |
| rs17239352 | 4 | 62841167 | G | 0.00211 |
| rs778933   | 4 | 62941177 | G | 0.01407 |
| rs778934   | 4 | 62942012 | A | 0.00731 |
| rs4330377  | 4 | 63229043 | T | 0.01351 |
| rs11940289 | 4 | 63607432 | A | 0.01048 |

|            |   |          |   |         |
|------------|---|----------|---|---------|
| rs6840349  | 4 | 64613934 | A | 0.01310 |
| rs12651540 | 4 | 64767521 | C | 0.01595 |
| rs6817560  | 4 | 64827255 | T | 0.00419 |
| rs1601076  | 4 | 64935458 | G | 0.01005 |
| rs10517893 | 4 | 64952717 | G | 0.00184 |
| rs9998808  | 4 | 64955197 | A | 0.01212 |
| rs2198103  | 4 | 65954774 | A | 0.00611 |
| rs17086363 | 4 | 66310557 | G | 0.00470 |
| rs4434311  | 4 | 66401913 | A | 0.01068 |
| rs4860723  | 4 | 66490958 | A | 0.01379 |
| rs1433622  | 4 | 66500848 | A | 7.14600 |
| rs17086743 | 4 | 66674916 | G | 0.01246 |
| rs980448   | 4 | 66687591 | G | 0.00410 |
| rs17087597 | 4 | 67424039 | T | 0.00302 |
| rs12504640 | 4 | 67865677 | T | 0.00363 |
| rs17820729 | 4 | 67916100 | G | 0.01408 |
| rs930438   | 4 | 67923741 | G | 0.01577 |
| rs931360   | 4 | 68135468 | C | 0.00353 |
| rs1458236  | 4 | 69817484 | C | 0.01390 |
| rs1598904  | 4 | 69848375 | A | 0.00979 |
| rs1458243  | 4 | 69848638 | G | 0.00866 |
| rs1458246  | 4 | 69852671 | G | 0.01295 |
| rs10000481 | 4 | 69871762 | C | 0.01465 |
| rs2017990  | 4 | 69897763 | G | 0.00797 |
| rs6811878  | 4 | 69912185 | C | 0.01615 |
| rs6858558  | 4 | 70004132 | T | 0.01002 |
| rs4348160  | 4 | 70052120 | C | 0.00508 |
| rs13151367 | 4 | 70603166 | A | 0.01451 |
| rs10019305 | 4 | 70754122 | A | 0.01387 |
| rs17713792 | 4 | 71189199 | C | 0.01575 |
| rs2013685  | 4 | 71224700 | A | 0.01486 |
| rs4694087  | 4 | 72138031 | G | 0.00179 |
| rs4694380  | 4 | 72209645 | C | 0.00240 |
| rs16846797 | 4 | 72742029 | A | 0.01151 |
| rs381121   | 4 | 72790933 | T | 0.01469 |
| rs16848366 | 4 | 73714898 | G | 0.00844 |
| rs10518108 | 4 | 73794412 | A | 0.01261 |
| rs11935685 | 4 | 73827020 | T | 0.00949 |
| rs2366714  | 4 | 74072815 | A | 0.00998 |
| rs4694155  | 4 | 74150390 | T | 0.00279 |
| rs9291182  | 4 | 74313364 | T | 0.01320 |
| rs10938086 | 4 | 74615570 | A | 0.00951 |
| rs1951242  | 4 | 74836146 | A | 0.00953 |
| rs10938095 | 4 | 74845025 | A | 0.01579 |



|            |   |          |   |         |
|------------|---|----------|---|---------|
| rs6828409  | 4 | 75431587 | G | 0.01437 |
| rs6854845  | 4 | 75965689 | C | 0.01079 |
| rs6827697  | 4 | 76204933 | G | 0.00936 |
| rs17000197 | 4 | 76215877 | A | 0.00170 |
| rs17000199 | 4 | 76216335 | A | 0.00358 |
| rs4859581  | 4 | 77125998 | G | 0.00467 |
| rs4422436  | 4 | 77196808 | G | 0.00142 |
| rs11114091 | 4 | 77363283 | A | 0.00115 |
| rs2289514  | 4 | 77396841 | T | 0.01144 |
| rs6819794  | 4 | 77397403 | T | 0.00894 |
| rs11721509 | 4 | 77652912 | T | 0.01115 |
| rs35471029 | 4 | 77909836 | C | 0.00949 |
| rs1874564  | 4 | 78077129 | A | 0.00148 |
| rs9307224  | 4 | 78095863 | T | 0.00003 |
| rs904032   | 4 | 78132337 | C | 0.00836 |
| rs904033   | 4 | 78132395 | A | 0.00282 |
| rs11097684 | 4 | 78264709 | A | 0.00819 |
| rs17002578 | 4 | 78492170 | T | 0.01579 |
| rs41476645 | 4 | 78563409 | A | 0.00992 |
| rs12644936 | 4 | 78564144 | T | 0.01233 |
| rs17002700 | 4 | 78636561 | C | 0.01656 |
| rs41496046 | 4 | 78760362 | A | 0.00008 |
| rs4859879  | 4 | 78941339 | T | 0.01475 |
| rs11097938 | 4 | 78954919 | A | 0.00689 |
| rs4577601  | 4 | 79077539 | A | 0.01441 |
| rs12641050 | 4 | 79143992 | A | 0.00249 |
| rs7657082  | 4 | 79755464 | A | 0.01195 |
| rs1545805  | 4 | 80133431 | T | 0.00531 |
| rs1383421  | 4 | 80154502 | G | 0.00596 |
| rs899900   | 4 | 80158557 | G | 0.00483 |
| rs17003582 | 4 | 80168623 | T | 0.01194 |
| rs2604828  | 4 | 80202969 | C | 0.00253 |
| rs6817424  | 4 | 81217787 | C | 0.01208 |
| rs2903651  | 4 | 81222545 | C | 0.01508 |
| rs12650677 | 4 | 81442178 | T | 0.01114 |
| rs6822305  | 4 | 81471743 | T | 0.01047 |
| rs7683819  | 4 | 81597990 | G | 0.01338 |
| rs4346635  | 4 | 81705296 | A | 0.00990 |
| rs10025495 | 4 | 81759113 | T | 0.00543 |
| rs10213174 | 4 | 82053941 | C | 0.01272 |
| rs10004901 | 4 | 82116029 | G | 0.01190 |
| rs2685468  | 4 | 82208527 | C | 0.00355 |
| rs7675843  | 4 | 82254091 | G | 0.00603 |
| rs13128387 | 4 | 82636616 | G | 0.00835 |

|            |   |          |   |         |
|------------|---|----------|---|---------|
| rs4574400  | 4 | 82827868 | A | 0.00173 |
| rs6839535  | 4 | 82829803 | C | 0.00426 |
| rs9996469  | 4 | 82833681 | T | 0.01279 |
| rs4693369  | 4 | 82890258 | A | 0.00549 |
| rs7676420  | 4 | 83784882 | G | 0.01235 |
| rs7685043  | 4 | 84011522 | C | 0.00747 |
| rs11099561 | 4 | 84105925 | G | 0.00269 |
| rs6827060  | 4 | 85368152 | A | 0.00429 |
| rs763540   | 4 | 85594591 | C | 0.01280 |
| rs11728145 | 4 | 85903170 | G | 0.00578 |
| rs17387199 | 4 | 86659782 | C | 0.00863 |
| rs1994069  | 4 | 86686809 | G | 0.01548 |
| rs346500   | 4 | 87072582 | A | 0.00695 |
| rs17012007 | 4 | 87844757 | C | 0.00163 |
| rs10015508 | 4 | 88013326 | G | 0.01325 |
| rs6811350  | 4 | 88018240 | G | 0.00878 |
| rs431836   | 4 | 88192729 | T | 0.00831 |
| rs11733008 | 4 | 88890962 | G | 0.00678 |
| rs7696304  | 4 | 89179022 | G | 0.00128 |
| rs10024717 | 4 | 89438669 | C | 0.00781 |
| rs2602117  | 4 | 89848089 | A | 0.00929 |
| rs17014666 | 4 | 89983966 | T | 0.01238 |
| rs6829149  | 4 | 90609910 | C | 0.01218 |
| rs1837890  | 4 | 90955029 | T | 0.01248 |
| rs1442143  | 4 | 90955047 | T | 0.01127 |
| rs2583983  | 4 | 90972983 | C | 0.00287 |
| rs12649663 | 4 | 91142273 | G | 0.00454 |
| rs17016827 | 4 | 91488705 | A | 0.00333 |
| rs4693266  | 4 | 92337328 | G | 0.00571 |
| rs12646638 | 4 | 92599947 | G | 0.00654 |
| rs9991015  | 4 | 92739442 | C | 0.00822 |
| rs10014070 | 4 | 92740065 | A | 0.00498 |
| rs10213431 | 4 | 92857897 | A | 0.00087 |
| rs4513527  | 4 | 92975976 | C | 0.01569 |
| rs6858269  | 4 | 93237113 | C | 0.00220 |
| rs6837448  | 4 | 93254945 | C | 0.01261 |
| rs7691723  | 4 | 94404728 | G | 0.00859 |
| rs4699421  | 4 | 96474594 | T | 0.00514 |
| rs2621455  | 4 | 96515157 | C | 0.00517 |
| rs6824501  | 4 | 96522013 | G | 0.00045 |
| rs10017332 | 4 | 96561773 | T | 0.00754 |
| rs11097493 | 4 | 97239637 | A | 0.01389 |
| rs10006108 | 4 | 98143036 | G | 0.01422 |
| rs1381822  | 4 | 98462402 | G | 0.00917 |

|            |   |           |   |         |
|------------|---|-----------|---|---------|
| rs9991048  | 4 | 99651816  | C | 0.00832 |
| rs4699345  | 4 | 99685529  | T | 0.00391 |
| rs4235430  | 4 | 99887334  | T | 0.01066 |
| rs10516438 | 4 | 100065138 | G | 0.01443 |
| rs17216446 | 4 | 100195669 | A | 0.00706 |
| rs13134954 | 4 | 100932644 | A | 0.00943 |
| rs11735070 | 4 | 100932788 | C | 0.00480 |
| rs10516464 | 4 | 101552381 | T | 0.00596 |
| rs1846878  | 4 | 101600793 | G | 0.01641 |
| rs1392880  | 4 | 101714865 | G | 0.00639 |
| rs7695269  | 4 | 101963692 | A | 0.00671 |
| rs12647454 | 4 | 102081481 | A | 0.01504 |
| rs2119601  | 4 | 102392909 | T | 0.00437 |
| rs230529   | 4 | 103676448 | C | 0.01177 |
| rs1598859  | 4 | 103725482 | A | 0.01087 |
| rs4648068  | 4 | 103737343 | A | 0.01640 |
| rs2725771  | 4 | 105978188 | A | 0.00342 |
| rs3886330  | 4 | 105991543 | C | 0.00989 |
| rs6533163  | 4 | 106013709 | T | 0.01433 |
| rs17035270 | 4 | 106255994 | G | 0.01337 |
| rs2726506  | 4 | 106528167 | A | 0.01320 |
| rs4699182  | 4 | 106633149 | C | 0.00475 |
| rs7672413  | 4 | 106698459 | T | 0.00505 |
| rs2866792  | 4 | 106708112 | A | 0.00328 |
| rs11930965 | 4 | 106814074 | C | 0.01500 |
| rs10028834 | 4 | 108073042 | C | 0.01110 |
| rs17037205 | 4 | 108142950 | G | 0.00744 |
| rs403608   | 4 | 108235182 | A | 0.00078 |
| rs10155071 | 4 | 108323818 | C | 0.00488 |
| rs2726164  | 4 | 108685112 | G | 0.00292 |
| rs11097982 | 4 | 109510233 | A | 0.00445 |
| rs1405159  | 4 | 110115596 | A | 0.00078 |
| rs1648016  | 4 | 110149096 | A | 0.01191 |
| rs3108958  | 4 | 110227110 | T | 0.00847 |
| rs12646527 | 4 | 110227270 | T | 0.01220 |
| rs10026219 | 4 | 110430566 | A | 0.01366 |
| rs4541508  | 4 | 110901936 | G | 0.01365 |
| rs9991367  | 4 | 111113750 | A | 0.00412 |
| rs17552333 | 4 | 111652858 | A | 0.00467 |
| rs6852021  | 4 | 111963561 | A | 0.00443 |
| rs9307361  | 4 | 112168892 | G | 0.01590 |
| rs159476   | 4 | 112171839 | C | 0.00940 |
| rs159471   | 4 | 112180135 | G | 0.01072 |
| rs11098097 | 4 | 112287053 | A | 0.00472 |

|            |   |           |   |         |
|------------|---|-----------|---|---------|
| rs17589367 | 4 | 113435284 | G | 0.00583 |
| rs879068   | 4 | 113598950 | A | 0.01421 |
| rs12504906 | 4 | 114173750 | T | 0.00445 |
| rs6533666  | 4 | 114234985 | G | 0.00734 |
| rs17446453 | 4 | 114641161 | A | 0.00819 |
| rs4834347  | 4 | 114645383 | A | 0.00769 |
| rs11098193 | 4 | 114648856 | A | 0.01373 |
| rs6821520  | 4 | 114732247 | T | 0.01205 |
| rs3942964  | 4 | 115328814 | C | 0.00941 |
| rs3924717  | 4 | 115460993 | A | 0.00147 |
| rs4385142  | 4 | 115660061 | A | 0.01652 |
| rs41352946 | 4 | 115668021 | T | 0.01194 |
| rs9991654  | 4 | 116010529 | T | 0.01278 |
| rs7680117  | 4 | 116949884 | T | 0.00034 |
| rs7697741  | 4 | 117024524 | G | 0.01511 |
| rs1906694  | 4 | 117400685 | T | 0.01067 |
| rs7669497  | 4 | 117428886 | C | 0.01608 |
| rs6832218  | 4 | 117435227 | C | 0.00537 |
| rs11935514 | 4 | 117488271 | G | 0.01424 |
| rs41518644 | 4 | 117488695 | G | 0.00673 |
| rs17048529 | 4 | 117544399 | G | 0.01471 |
| rs10024666 | 4 | 117909770 | C | 0.01184 |
| rs1440312  | 4 | 118055468 | G | 0.00465 |
| rs977017   | 4 | 118214880 | T | 0.00883 |
| rs4501289  | 4 | 118541939 | A | 0.01465 |
| rs10018600 | 4 | 118996306 | T | 0.00579 |
| rs9992827  | 4 | 119330665 | G | 0.00490 |
| rs7670182  | 4 | 119935786 | T | 0.00090 |
| rs10518324 | 4 | 119937161 | T | 0.00247 |
| rs17325192 | 4 | 119999793 | A | 0.00757 |
| rs17517470 | 4 | 120495764 | C | 0.01126 |
| rs10006706 | 4 | 120628600 | A | 0.01441 |
| rs12510138 | 4 | 120643383 | G | 0.00004 |
| rs10026533 | 4 | 121913509 | C | 0.01162 |
| rs1588524  | 4 | 121986119 | T | 0.00351 |
| rs4532258  | 4 | 122156529 | G | 0.00533 |
| rs34766411 | 4 | 122177009 | G | 0.00626 |
| rs6829190  | 4 | 122203473 | T | 0.00343 |
| rs2136948  | 4 | 122215148 | A | 0.00464 |
| rs13138476 | 4 | 122220644 | G | 0.00197 |
| rs13128284 | 4 | 122235041 | C | 0.01092 |
| rs2102646  | 4 | 122608859 | C | 0.01278 |
| rs4546266  | 4 | 122874293 | G | 0.01425 |
| rs17005387 | 4 | 123156648 | A | 0.00748 |

|            |   |           |   |         |
|------------|---|-----------|---|---------|
| rs17006928 | 4 | 124581485 | A | 0.00896 |
| rs17007339 | 4 | 124899190 | T | 0.01463 |
| rs9992459  | 4 | 124901195 | T | 0.01662 |
| rs893558   | 4 | 125298311 | A | 0.01503 |
| rs1608462  | 4 | 125498130 | T | 0.01616 |
| rs17008284 | 4 | 125660620 | C | 0.00584 |
| rs2170743  | 4 | 126084103 | G | 0.00718 |
| rs2710551  | 4 | 126417894 | A | 0.01359 |
| rs925243   | 4 | 126534484 | A | 0.00497 |
| rs2390896  | 4 | 127017986 | A | 0.00632 |
| rs11932292 | 4 | 127027641 | A | 0.01100 |
| rs16997921 | 4 | 127865196 | T | 0.00854 |
| rs17291185 | 4 | 128212158 | A | 0.01390 |
| rs967534   | 4 | 128379976 | C | 0.00741 |
| rs17315466 | 4 | 129174097 | T | 0.01666 |
| rs7655151  | 4 | 129516372 | T | 0.01511 |
| rs17013256 | 4 | 129532392 | C | 0.01131 |
| rs1980945  | 4 | 130348262 | T | 0.01184 |
| rs587191   | 4 | 130633524 | G | 0.00552 |
| rs958409   | 4 | 131253674 | C | 0.01025 |
| rs2172478  | 4 | 131281403 | C | 0.01330 |
| rs1552802  | 4 | 131281674 | A | 0.00972 |
| rs4473663  | 4 | 131601175 | C | 0.01407 |
| rs6845004  | 4 | 131632208 | G | 0.00458 |
| rs2861394  | 4 | 132429544 | A | 0.00813 |
| rs6847963  | 4 | 133143041 | T | 0.00246 |
| rs1511333  | 4 | 133148446 | G | 0.00188 |
| rs17468426 | 4 | 133148931 | C | 0.00007 |
| rs1499348  | 4 | 133572980 | A | 0.00303 |
| rs1875024  | 4 | 133615345 | T | 0.01410 |
| rs7671052  | 4 | 134324454 | C | 0.01149 |
| rs7691662  | 4 | 135291303 | G | 0.01101 |
| rs7663402  | 4 | 135469395 | G | 0.00490 |
| rs7654065  | 4 | 136731472 | T | 0.00150 |
| rs7692855  | 4 | 136735906 | A | 0.01371 |
| rs11737477 | 4 | 136740519 | T | 0.01158 |
| rs13119704 | 4 | 136748977 | A | 0.00115 |
| rs6811227  | 4 | 136870694 | A | 0.01293 |
| rs17048200 | 4 | 136918253 | T | 0.00979 |
| rs11730105 | 4 | 136929875 | T | 0.00191 |
| rs12510799 | 4 | 136934225 | G | 0.01593 |
| rs1870567  | 4 | 137887076 | G | 0.01393 |
| rs17619365 | 4 | 137954379 | G | 0.00580 |
| rs10519401 | 4 | 137998350 | A | 0.01171 |

|            |   |           |   |         |
|------------|---|-----------|---|---------|
| rs1598567  | 4 | 138207018 | T | 0.00956 |
| rs7698992  | 4 | 138586502 | G | 0.00426 |
| rs12648234 | 4 | 140347897 | T | 0.01505 |
| rs17050884 | 4 | 140861707 | G | 0.01625 |
| rs6835548  | 4 | 140863594 | T | 0.00736 |
| rs4863683  | 4 | 140895835 | C | 0.01219 |
| rs6818154  | 4 | 140907901 | T | 0.00098 |
| rs795985   | 4 | 141009888 | T | 0.00436 |
| rs769686   | 4 | 141069202 | T | 0.00090 |
| rs17313183 | 4 | 141107288 | T | 0.01000 |
| rs11100483 | 4 | 141241767 | T | 0.00464 |
| rs2036947  | 4 | 141475312 | A | 0.01665 |
| rs996116   | 4 | 141484584 | C | 0.01662 |
| rs4956293  | 4 | 141509306 | C | 0.01374 |
| rs358315   | 4 | 141524043 | A | 0.01150 |
| rs358317   | 4 | 141524729 | A | 0.00388 |
| rs358332   | 4 | 141534172 | A | 0.00219 |
| rs7698088  | 4 | 141771058 | T | 0.00834 |
| rs11725890 | 4 | 141912965 | T | 0.01550 |
| rs6817432  | 4 | 141942954 | C | 0.00399 |
| rs970509   | 4 | 142897271 | G | 0.01263 |
| rs10033884 | 4 | 142898776 | G | 0.00796 |
| rs4254850  | 4 | 142907840 | A | 0.01411 |
| rs10011008 | 4 | 143067127 | C | 0.00731 |
| rs7663877  | 4 | 143070590 | A | 0.01443 |
| rs1580840  | 4 | 143146381 | C | 0.00177 |
| rs2645799  | 4 | 143193708 | C | 0.00139 |
| rs2667099  | 4 | 143195291 | C | 0.01225 |
| rs1353603  | 4 | 143222465 | C | 0.01070 |
| rs2627829  | 4 | 143334179 | G | 0.01104 |
| rs6835296  | 4 | 143674737 | T | 0.01042 |
| rs5016160  | 4 | 144878908 | G | 0.01222 |
| rs12510585 | 4 | 145412189 | G | 0.01309 |
| rs11100847 | 4 | 145441160 | G | 0.00918 |
| rs6537278  | 4 | 145477389 | C | 0.00875 |
| rs6537302  | 4 | 145807566 | A | 0.01047 |
| rs17020919 | 4 | 147178052 | T | 0.00663 |
| rs891382   | 4 | 147371790 | C | 0.00171 |
| rs41398848 | 4 | 147662987 | A | 0.01351 |
| rs17021632 | 4 | 147752642 | G | 0.00872 |
| rs17021660 | 4 | 147762864 | C | 0.01044 |
| rs17021984 | 4 | 147959961 | G | 0.01540 |
| rs12503342 | 4 | 148056414 | A | 0.01279 |
| rs4399964  | 4 | 148303755 | T | 0.00249 |

|            |   |           |   |         |
|------------|---|-----------|---|---------|
| rs1429117  | 4 | 148560383 | G | 0.00818 |
| rs17023259 | 4 | 148581870 | A | 0.00686 |
| rs10519914 | 4 | 148897061 | T | 0.01584 |
| rs12513192 | 4 | 149038027 | C | 0.00159 |
| rs17024456 | 4 | 149319702 | G | 0.00881 |
| rs3846307  | 4 | 149358086 | C | 0.00646 |
| rs2461796  | 4 | 149909433 | T | 0.00494 |
| rs10021639 | 4 | 150054931 | C | 0.01632 |
| rs1438765  | 4 | 150349311 | C | 0.00668 |
| rs1553427  | 4 | 150652365 | G | 0.01039 |
| rs4634199  | 4 | 151173679 | A | 0.01569 |
| rs11932482 | 4 | 151665241 | A | 0.00236 |
| rs17275584 | 4 | 152742777 | G | 0.00277 |
| rs17027958 | 4 | 153002089 | G | 0.00466 |
| rs17276464 | 4 | 153248310 | G | 0.00487 |
| rs2897464  | 4 | 153310773 | A | 0.01042 |
| rs4586908  | 4 | 153313090 | G | 0.01422 |
| rs6839665  | 4 | 153844477 | C | 0.00271 |
| rs1516689  | 4 | 154239518 | A | 0.00494 |
| rs10009522 | 4 | 154382844 | C | 0.00542 |
| rs1371653  | 4 | 154526003 | T | 0.00165 |
| rs3804099  | 4 | 154844106 | T | 0.00707 |
| rs17371545 | 4 | 154983430 | G | 0.00839 |
| rs997850   | 4 | 155057884 | G | 0.00103 |
| rs1500394  | 4 | 155987069 | A | 0.01599 |
| rs6832964  | 4 | 155991081 | T | 0.01623 |
| rs1500370  | 4 | 155991353 | G | 0.01241 |
| rs4463024  | 4 | 156284216 | G | 0.00562 |
| rs17377596 | 4 | 156501572 | G | 0.01093 |
| rs6826142  | 4 | 157029976 | A | 0.00635 |
| rs7671586  | 4 | 157152014 | T | 0.00506 |
| rs10517631 | 4 | 157309355 | C | 0.01176 |
| rs1490567  | 4 | 157622130 | A | 0.00917 |
| rs6811244  | 4 | 157754977 | T | 0.01644 |
| rs7672387  | 4 | 157771848 | C | 0.00752 |
| rs7682779  | 4 | 158739512 | T | 0.00413 |
| rs41494044 | 4 | 159394489 | T | 0.00879 |
| rs11728753 | 4 | 159401857 | C | 0.01467 |
| rs2291007  | 4 | 160047778 | T | 0.01359 |
| rs9998057  | 4 | 160054590 | C | 0.01075 |
| rs2707671  | 4 | 160634843 | T | 0.01054 |
| rs998886   | 4 | 160714504 | G | 0.01600 |
| rs6835919  | 4 | 161525531 | C | 0.01508 |
| rs34082346 | 4 | 161529034 | T | 0.01369 |

|            |   |           |   |         |
|------------|---|-----------|---|---------|
| rs1898866  | 4 | 161529827 | G | 0.01335 |
| rs7677076  | 4 | 161530598 | T | 0.00216 |
| rs8180366  | 4 | 161935753 | C | 0.00335 |
| rs13128164 | 4 | 161937609 | G | 0.00820 |
| rs6838547  | 4 | 162014886 | T | 0.00746 |
| rs2068177  | 4 | 162151909 | A | 0.01148 |
| rs17375482 | 4 | 162231847 | A | 0.01052 |
| rs10022176 | 4 | 162252238 | T | 0.00767 |
| rs13130537 | 4 | 162937822 | A | 0.00160 |
| rs10016003 | 4 | 163001732 | G | 0.00790 |
| rs45426    | 4 | 163113553 | C | 0.00169 |
| rs17538472 | 4 | 163257691 | G | 0.01237 |
| rs6812566  | 4 | 163445860 | C | 0.00822 |
| rs7675931  | 4 | 163454734 | C | 0.01247 |
| rs195891   | 4 | 163752167 | C | 0.00585 |
| rs7655870  | 4 | 163835337 | A | 0.01169 |
| rs10517771 | 4 | 163906222 | G | 0.01444 |
| rs7679637  | 4 | 163931875 | A | 0.01082 |
| rs4057780  | 4 | 164495979 | C | 0.00892 |
| rs17610283 | 4 | 164559816 | G | 0.00686 |
| rs10213166 | 4 | 164740516 | T | 0.00703 |
| rs12500778 | 4 | 164939833 | G | 0.00058 |
| rs6814461  | 4 | 165835450 | T | 0.00352 |
| rs12500546 | 4 | 166018436 | G | 0.00326 |
| rs4690796  | 4 | 166092275 | G | 0.00370 |
| rs1438111  | 4 | 166504639 | A | 0.01392 |
| rs7663386  | 4 | 166585980 | G | 0.00855 |
| rs17504041 | 4 | 166809379 | A | 0.00522 |
| rs17047207 | 4 | 167176102 | T | 0.00682 |
| rs6837937  | 4 | 167318791 | G | 0.01285 |
| rs17047336 | 4 | 167319366 | A | 0.01041 |
| rs7664643  | 4 | 168181330 | C | 0.00640 |
| rs6818745  | 4 | 168193181 | G | 0.00221 |
| rs12505330 | 4 | 168378522 | C | 0.01340 |
| rs992771   | 4 | 168722326 | T | 0.00877 |
| rs10517948 | 4 | 168761544 | T | 0.01357 |
| rs13129385 | 4 | 168821802 | T | 0.00221 |
| rs6854037  | 4 | 169987574 | G | 0.00214 |
| rs12507746 | 4 | 170916769 | G | 4.54700 |
| rs2955270  | 4 | 171085739 | A | 0.00262 |
| rs531210   | 4 | 171319526 | T | 0.00227 |
| rs1522600  | 4 | 171386286 | T | 0.01105 |
| rs17055545 | 4 | 171439939 | C | 0.00414 |
| rs4692825  | 4 | 171529500 | A | 0.01396 |



|            |   |           |   |          |
|------------|---|-----------|---|----------|
| rs1157749  | 4 | 171677589 | G | 0.01350  |
| rs435979   | 4 | 171763310 | G | 0.01520  |
| rs9994424  | 4 | 171821698 | T | 0.01449  |
| rs5009480  | 4 | 171823438 | A | 0.00839  |
| rs10029768 | 4 | 171871392 | G | 0.00349  |
| rs17056458 | 4 | 172269070 | C | 0.01268  |
| rs4692870  | 4 | 172384937 | C | 0.00069  |
| rs1565468  | 4 | 172863064 | T | 0.00286  |
| rs17057526 | 4 | 173032406 | C | 0.00366  |
| rs2172192  | 4 | 173241159 | A | 0.01232  |
| rs17058017 | 4 | 173241632 | C | 0.00938  |
| rs41516045 | 4 | 173366322 | T | 0.00291  |
| rs17222718 | 4 | 173445368 | C | 0.00563  |
| rs6841156  | 4 | 173889675 | T | 0.00092  |
| rs13134194 | 4 | 173922367 | C | 10.35100 |
| rs6819460  | 4 | 173933544 | G | 0.01505  |
| rs17325472 | 4 | 174559706 | C | 0.00191  |
| rs13148735 | 4 | 174559803 | C | 0.00914  |
| rs10520270 | 4 | 175283560 | T | 0.00613  |
| rs6836227  | 4 | 175306818 | T | 0.00997  |
| rs10520286 | 4 | 175712320 | T | 0.00120  |
| rs1994701  | 4 | 176027903 | G | 0.01048  |
| rs2127292  | 4 | 176166505 | T | 0.00026  |
| rs330504   | 4 | 176317657 | G | 0.00839  |
| rs12505348 | 4 | 176429349 | T | 0.00121  |
| rs17061762 | 4 | 176815078 | A | 0.01312  |
| rs6829241  | 4 | 177267544 | C | 0.01404  |
| rs6832177  | 4 | 177350830 | A | 0.00773  |
| rs4589981  | 4 | 177402176 | A | 0.00419  |
| rs4690671  | 4 | 177402550 | T | 0.00127  |
| rs13115859 | 4 | 177461443 | G | 0.00465  |
| rs4077385  | 4 | 177465508 | T | 0.00595  |
| rs12331837 | 4 | 177465879 | T | 0.01087  |
| rs11133144 | 4 | 177466713 | C | 0.00094  |
| rs7693835  | 4 | 178527758 | C | 0.00674  |
| rs13135116 | 4 | 178904409 | C | 0.01467  |
| rs2666063  | 4 | 179533035 | T | 0.00046  |
| rs364687   | 4 | 179903060 | G | 0.01565  |
| rs9312239  | 4 | 180199353 | A | 0.01421  |
| rs28675693 | 4 | 180261121 | T | 0.01458  |
| rs10016804 | 4 | 180286027 | G | 0.01347  |
| rs1457394  | 4 | 180407643 | G | 0.01407  |
| rs1457392  | 4 | 180407774 | T | 0.00868  |
| rs7658508  | 4 | 180584359 | A | 0.01260  |

|            |   |           |   |         |
|------------|---|-----------|---|---------|
| rs2584433  | 4 | 180753885 | A | 0.00778 |
| rs6552375  | 4 | 180754445 | A | 0.01113 |
| rs13125519 | 4 | 180915220 | T | 0.01045 |
| rs10866234 | 4 | 181468074 | A | 0.00647 |
| rs10029127 | 4 | 181581933 | T | 0.00246 |
| rs17178678 | 4 | 181582068 | C | 0.00682 |
| rs17070060 | 4 | 181893560 | A | 0.01456 |
| rs12639725 | 4 | 182605472 | A | 0.00263 |
| rs12331239 | 4 | 182702239 | C | 0.00661 |
| rs17270544 | 4 | 182766563 | T | 0.01310 |
| rs4453971  | 4 | 182929392 | G | 0.00949 |
| rs17072756 | 4 | 183232158 | A | 0.01315 |
| rs13148469 | 4 | 183509306 | G | 0.01139 |
| rs6552560  | 4 | 183529623 | T | 0.00453 |
| rs11945229 | 4 | 183614918 | G | 0.01095 |
| rs3924788  | 4 | 184044359 | T | 0.01497 |
| rs1377943  | 4 | 184166575 | G | 0.01268 |
| rs1467097  | 4 | 184539366 | G | 0.00185 |
| rs6816216  | 4 | 184613845 | A | 0.00164 |
| rs11723316 | 4 | 184652332 | C | 0.00559 |
| rs13132455 | 4 | 184896441 | A | 0.01602 |
| rs987465   | 4 | 184951955 | G | 0.00477 |
| rs17090674 | 4 | 185156464 | A | 0.01055 |
| rs1863316  | 4 | 185627449 | T | 0.00797 |
| rs2171838  | 4 | 185904398 | G | 0.00116 |
| rs7672399  | 4 | 186046913 | A | 0.00778 |
| rs6552838  | 4 | 186047130 | C | 0.00000 |
| rs4466084  | 4 | 186130980 | T | 0.01042 |
| rs4862528  | 4 | 186596985 | C | 0.01209 |
| rs2306707  | 4 | 186796103 | A | 0.00525 |
| rs10028428 | 4 | 186936578 | A | 0.01033 |
| rs4861696  | 4 | 187172829 | A | 0.01023 |
| rs6842047  | 4 | 187370570 | A | 0.00060 |
| rs6845924  | 4 | 187629793 | G | 0.00964 |
| rs397321   | 4 | 188052641 | A | 0.01017 |
| rs6553029  | 4 | 188113464 | G | 0.01160 |
| rs6821507  | 4 | 188113823 | G | 0.00989 |
| rs766772   | 4 | 188314010 | A | 0.00670 |
| rs427462   | 4 | 189539641 | C | 0.00815 |
| rs13107630 | 4 | 189602503 | T | 0.00922 |
| rs1395612  | 4 | 189670284 | C | 0.01178 |
| rs10018432 | 4 | 189674080 | C | 0.00900 |
| rs6833298  | 4 | 189985301 | C | 0.00190 |
| rs6553249  | 4 | 190065331 | G | 0.00305 |

|            |   |           |   |         |
|------------|---|-----------|---|---------|
| rs2132668  | 4 | 190218321 | T | 0.00315 |
| rs7684484  | 4 | 190362801 | C | 0.00656 |
| rs7684496  | 4 | 190362818 | G | 0.01360 |
| rs2739542  | 4 | 190963859 | C | 0.01616 |
| rs17563576 | 5 | 613476    | G | 0.01291 |
| rs12656150 | 5 | 875123    | A | 0.00057 |
| rs3747739  | 5 | 936065    | G | 0.00045 |
| rs10038119 | 5 | 2045286   | A | 0.00074 |
| rs7733952  | 5 | 2411493   | C | 0.00246 |
| rs16869878 | 5 | 2576761   | G | 0.00492 |
| rs1466054  | 5 | 2609337   | G | 0.01357 |
| rs7702236  | 5 | 2656309   | A | 0.00773 |
| rs6555117  | 5 | 2688891   | C | 0.00986 |
| rs17673214 | 5 | 2961851   | G | 0.01593 |
| rs13167386 | 5 | 3102987   | T | 0.00194 |
| rs16870933 | 5 | 3103455   | T | 0.01330 |
| rs10041553 | 5 | 3103780   | T | 0.01094 |
| rs1971938  | 5 | 3129318   | A | 0.00284 |
| rs32723    | 5 | 3504906   | G | 0.00729 |
| rs3938039  | 5 | 4229833   | G | 0.01363 |
| rs1501737  | 5 | 4360636   | A | 0.01627 |
| rs261189   | 5 | 4378585   | G | 0.01645 |
| rs261187   | 5 | 4378739   | T | 0.01617 |
| rs261182   | 5 | 4379793   | A | 0.01119 |
| rs261181   | 5 | 4380302   | T | 0.01180 |
| rs261179   | 5 | 4380853   | C | 0.01633 |
| rs261163   | 5 | 4394950   | A | 0.01418 |
| rs261150   | 5 | 4405277   | T | 0.01569 |
| rs261130   | 5 | 4429717   | G | 0.00528 |
| rs2619802  | 5 | 5145343   | C | 0.01054 |
| rs987587   | 5 | 5145444   | C | 0.01313 |
| rs12658487 | 5 | 5274568   | T | 0.00158 |
| rs890770   | 5 | 5319740   | T | 0.00702 |
| rs1863943  | 5 | 5450165   | T | 9.66600 |
| rs4702266  | 5 | 5450628   | A | 0.00442 |
| rs252614   | 5 | 5623992   | G | 0.00500 |
| rs2399610  | 5 | 5790796   | G | 0.01554 |
| rs7443606  | 5 | 5790979   | T | 0.00251 |
| rs441356   | 5 | 5803573   | T | 0.00696 |
| rs35740    | 5 | 5879215   | A | 0.00061 |
| rs6890159  | 5 | 5959041   | A | 0.00696 |
| rs1150461  | 5 | 5964381   | A | 0.01663 |
| rs1150462  | 5 | 5964422   | C | 0.01667 |
| rs160126   | 5 | 6009806   | C | 0.00872 |

|            |   |          |   |         |
|------------|---|----------|---|---------|
| rs1379305  | 5 | 6342200  | A | 0.00914 |
| rs12520404 | 5 | 6376989  | T | 0.01165 |
| rs16877663 | 5 | 6661629  | G | 0.00194 |
| rs4701757  | 5 | 6992018  | A | 0.00328 |
| rs4298226  | 5 | 7255635  | G | 0.00105 |
| rs13186772 | 5 | 7269226  | T | 0.00314 |
| rs4302553  | 5 | 7272495  | G | 0.01349 |
| rs10068942 | 5 | 7579847  | G | 0.00423 |
| rs4701786  | 5 | 7585455  | C | 0.01646 |
| rs17827533 | 5 | 7594566  | A | 0.00161 |
| rs326187   | 5 | 7890843  | T | 0.01597 |
| rs2388771  | 5 | 7970137  | T | 0.01640 |
| rs6866169  | 5 | 8048509  | T | 0.00024 |
| rs4461605  | 5 | 8492356  | C | 0.00625 |
| rs2962720  | 5 | 9062675  | T | 0.00711 |
| rs17196572 | 5 | 9351117  | C | 0.00593 |
| rs1018956  | 5 | 9363216  | C | 0.01607 |
| rs3777324  | 5 | 9372587  | C | 0.01017 |
| rs2696372  | 5 | 9406888  | T | 0.00094 |
| rs1205719  | 5 | 9409053  | G | 0.00501 |
| rs3822803  | 5 | 9511879  | A | 0.00690 |
| rs12659136 | 5 | 9518523  | T | 0.01304 |
| rs7735345  | 5 | 9570081  | A | 0.00033 |
| rs16883210 | 5 | 9628210  | A | 0.01482 |
| rs194070   | 5 | 9737672  | C | 0.00369 |
| rs11738850 | 5 | 10095771 | G | 0.01498 |
| rs16884161 | 5 | 10170459 | G | 0.00956 |
| rs11742483 | 5 | 10284467 | G | 0.00346 |
| rs938451   | 5 | 10578616 | G | 0.00295 |
| rs852620   | 5 | 11064945 | A | 0.00747 |
| rs31837    | 5 | 11450573 | A | 0.00879 |
| rs10053983 | 5 | 11859254 | A | 0.00459 |
| rs16902029 | 5 | 12169668 | G | 0.00696 |
| rs2968097  | 5 | 12251381 | T | 0.00903 |
| rs2400152  | 5 | 12423166 | T | 0.00522 |
| rs7715286  | 5 | 12449987 | A | 0.00003 |
| rs17164354 | 5 | 13188508 | C | 0.00944 |
| rs17210178 | 5 | 13259703 | A | 0.01475 |
| rs12691269 | 5 | 13336522 | A | 0.01197 |
| rs32394    | 5 | 14276271 | T | 0.01432 |
| rs17302408 | 5 | 14336073 | C | 0.01035 |
| rs26182    | 5 | 14523509 | C | 0.00537 |
| rs25943    | 5 | 14701689 | G | 0.01040 |
| rs10475028 | 5 | 14816229 | T | 0.01203 |

|            |   |          |   |         |
|------------|---|----------|---|---------|
| rs835079   | 5 | 15033517 | A | 0.01402 |
| rs16903769 | 5 | 15040953 | T | 0.01486 |
| rs6881461  | 5 | 15073458 | A | 0.01108 |
| rs301078   | 5 | 15193902 | T | 0.00673 |
| rs29965    | 5 | 16427042 | C | 0.00147 |
| rs154791   | 5 | 16502037 | A | 0.01138 |
| rs334470   | 5 | 16565364 | A | 0.00107 |
| rs1240649  | 5 | 16612581 | G | 0.00392 |
| rs149447   | 5 | 16648199 | T | 0.00949 |
| rs181940   | 5 | 16755375 | C | 0.00266 |
| rs253313   | 5 | 16924809 | T | 0.01138 |
| rs39896    | 5 | 16967516 | T | 0.01528 |
| rs10045328 | 5 | 17022392 | A | 0.01437 |
| rs297200   | 5 | 17190115 | G | 0.01616 |
| rs2731796  | 5 | 17206618 | C | 0.01265 |
| rs6894826  | 5 | 17554965 | T | 0.00251 |
| rs6450583  | 5 | 17713466 | G | 0.01369 |
| rs6867384  | 5 | 18057727 | G | 0.01263 |
| rs583360   | 5 | 18192076 | A | 0.00460 |
| rs314021   | 5 | 18355536 | C | 0.00580 |
| rs16886698 | 5 | 18755054 | T | 0.01239 |
| rs4398638  | 5 | 19016954 | C | 0.01135 |
| rs10940990 | 5 | 19026601 | A | 0.01634 |
| rs16885921 | 5 | 19523315 | C | 0.00922 |
| rs6869352  | 5 | 19916375 | A | 0.01234 |
| rs4866161  | 5 | 19938472 | G | 0.01285 |
| rs11960225 | 5 | 19947442 | T | 0.00923 |
| rs1911859  | 5 | 20052952 | A | 0.01041 |
| rs1703047  | 5 | 20594515 | C | 0.00947 |
| rs2115342  | 5 | 20626831 | T | 0.01246 |
| rs2388468  | 5 | 20950456 | T | 0.00971 |
| rs248194   | 5 | 21174112 | T | 0.00490 |
| rs7445981  | 5 | 22071307 | C | 0.01138 |
| rs4701563  | 5 | 22072008 | T | 0.01102 |
| rs16893106 | 5 | 24123313 | G | 0.00994 |
| rs1428371  | 5 | 24472348 | T | 0.01045 |
| rs6452255  | 5 | 25364578 | G | 0.00311 |
| rs168843   | 5 | 25775740 | A | 0.00634 |
| rs1585798  | 5 | 25784003 | G | 0.00669 |
| rs1678935  | 5 | 25786763 | T | 0.01119 |
| rs10942147 | 5 | 25946686 | T | 0.00573 |
| rs6862624  | 5 | 25947094 | C | 0.00972 |
| rs11954820 | 5 | 26011809 | A | 0.00334 |
| rs11954990 | 5 | 26075023 | G | 0.01032 |

|            |   |          |   |         |
|------------|---|----------|---|---------|
| rs11948589 | 5 | 27580527 | A | 0.00901 |
| rs4585457  | 5 | 27735627 | A | 0.01241 |
| rs10072478 | 5 | 28472749 | T | 0.01543 |
| rs13355546 | 5 | 28500650 | G | 0.00242 |
| rs11952771 | 5 | 28714271 | C | 0.01249 |
| rs2059188  | 5 | 28721624 | A | 0.00965 |
| rs2618415  | 5 | 29077660 | C | 0.00788 |
| rs1692334  | 5 | 29082619 | A | 0.01616 |
| rs602489   | 5 | 29088439 | T | 0.00464 |
| rs4621571  | 5 | 29256280 | T | 0.01634 |
| rs4620035  | 5 | 29296330 | C | 0.00961 |
| rs9784631  | 5 | 29361320 | A | 0.00349 |
| rs16899249 | 5 | 29690997 | A | 0.00041 |
| rs1428323  | 5 | 29947791 | A | 0.01011 |
| rs41433547 | 5 | 30675417 | G | 0.01018 |
| rs10520976 | 5 | 30893519 | G | 0.00114 |
| rs497441   | 5 | 31496174 | C | 0.01653 |
| rs17413207 | 5 | 31716798 | A | 0.00159 |
| rs16901543 | 5 | 31804937 | A | 0.00847 |
| rs12697260 | 5 | 31836366 | T | 0.00909 |
| rs16889543 | 5 | 32295529 | A | 0.00156 |
| rs696836   | 5 | 32770165 | C | 0.00953 |
| rs6893739  | 5 | 33634555 | A | 0.00599 |
| rs4409096  | 5 | 33753637 | C | 0.01292 |
| rs16891720 | 5 | 33824071 | G | 0.01157 |
| rs41517251 | 5 | 34091805 | C | 0.01407 |
| rs4703378  | 5 | 34565370 | G | 0.00407 |
| rs10521018 | 5 | 34889768 | G | 0.01149 |
| rs4703503  | 5 | 35198519 | T | 0.00654 |
| rs32784    | 5 | 35418110 | A | 0.01021 |
| rs6895801  | 5 | 35799673 | A | 0.00673 |
| rs10044838 | 5 | 35900347 | A | 0.00212 |
| rs10491434 | 5 | 35913671 | G | 0.01130 |
| rs17285269 | 5 | 36438551 | A | 0.00173 |
| rs2731888  | 5 | 36559672 | T | 0.01404 |
| rs7719968  | 5 | 37811015 | G | 0.01041 |
| rs1363927  | 5 | 37897338 | T | 0.00571 |
| rs6874732  | 5 | 38141194 | C | 0.00580 |
| rs10044233 | 5 | 38194423 | C | 0.00327 |
| rs11748742 | 5 | 38703445 | C | 0.00356 |
| rs16867716 | 5 | 38803308 | T | 0.01048 |
| rs700242   | 5 | 39420645 | T | 0.00135 |
| rs2939316  | 5 | 39585791 | C | 0.01072 |
| rs3947262  | 5 | 39616920 | C | 0.00857 |

|            |   |          |   |         |
|------------|---|----------|---|---------|
| rs538752   | 5 | 39941872 | C | 0.00048 |
| rs1159011  | 5 | 40174561 | A | 0.00905 |
| rs1366020  | 5 | 40174838 | T | 0.00834 |
| rs1505992  | 5 | 40534334 | T | 0.01540 |
| rs1553576  | 5 | 40545412 | A | 0.01430 |
| rs1553577  | 5 | 40545764 | T | 0.01084 |
| rs4957313  | 5 | 40551279 | G | 0.00913 |
| rs6896604  | 5 | 40551774 | T | 0.01446 |
| rs6866402  | 5 | 40553088 | A | 0.01591 |
| rs4957317  | 5 | 40553482 | G | 0.00742 |
| rs10941516 | 5 | 40557969 | A | 0.01631 |
| rs7718129  | 5 | 40564436 | C | 0.00084 |
| rs11750156 | 5 | 40597115 | G | 0.00478 |
| rs10055860 | 5 | 40605710 | C | 0.01357 |
| rs10055946 | 5 | 40605832 | G | 0.01492 |
| rs1122433  | 5 | 40614679 | T | 0.00371 |
| rs2135330  | 5 | 40637966 | G | 0.00134 |
| rs10473203 | 5 | 40642051 | A | 0.00954 |
| rs13362106 | 5 | 41046454 | A | 0.01028 |
| rs11750584 | 5 | 41129616 | C | 0.01107 |
| rs2194208  | 5 | 41324009 | A | 0.00689 |
| rs318070   | 5 | 41480555 | C | 0.01028 |
| rs35712799 | 5 | 41485655 | C | 0.00104 |
| rs7733683  | 5 | 41646914 | G | 0.01226 |
| rs11739609 | 5 | 41656596 | G | 0.00927 |
| rs3851448  | 5 | 41661649 | T | 0.01236 |
| rs309923   | 5 | 43004886 | T | 0.00791 |
| rs186322   | 5 | 43020395 | A | 0.00259 |
| rs12523231 | 5 | 45264593 | A | 0.00081 |
| rs12514062 | 5 | 51854141 | C | 0.01168 |
| rs7723161  | 5 | 51860390 | A | 0.00173 |
| rs830867   | 5 | 51952667 | C | 0.00824 |
| rs117931   | 5 | 52489623 | A | 0.01659 |
| rs2112876  | 5 | 52514472 | G | 0.01259 |
| rs254481   | 5 | 52531439 | G | 0.00199 |
| rs37809    | 5 | 52609049 | C | 0.00468 |
| rs37787    | 5 | 52677813 | C | 0.00184 |
| rs11950121 | 5 | 53214714 | C | 0.00946 |
| rs697112   | 5 | 53296436 | A | 0.01196 |
| rs278065   | 5 | 53484158 | A | 0.00130 |
| rs4141522  | 5 | 53656359 | A | 0.00032 |
| rs968813   | 5 | 53690381 | C | 0.00075 |
| rs12515791 | 5 | 53708606 | G | 0.01476 |
| rs6414829  | 5 | 54003879 | T | 0.00349 |

|            |   |          |   |         |
|------------|---|----------|---|---------|
| rs6880771  | 5 | 54093808 | C | 0.00497 |
| rs10045790 | 5 | 54126295 | T | 0.00723 |
| rs4380600  | 5 | 54129781 | C | 0.01198 |
| rs1023671  | 5 | 54300768 | T | 7.65100 |
| rs17346478 | 5 | 54301303 | T | 0.01106 |
| rs3822313  | 5 | 54310631 | T | 0.00349 |
| rs12513672 | 5 | 54862165 | G | 0.00063 |
| rs10062991 | 5 | 55205610 | T | 0.01183 |
| rs1997522  | 5 | 55687334 | T | 0.01332 |
| rs16885269 | 5 | 55687579 | A | 0.01341 |
| rs6892034  | 5 | 55689646 | G | 0.00356 |
| rs1645483  | 5 | 55692632 | C | 0.01195 |
| rs190820   | 5 | 55760461 | T | 0.00375 |
| rs30361    | 5 | 55867652 | C | 0.00605 |
| rs831793   | 5 | 56385936 | G | 0.00242 |
| rs865553   | 5 | 56386202 | C | 0.01446 |
| rs1002533  | 5 | 56443201 | C | 0.01442 |
| rs4699908  | 5 | 56950018 | A | 0.00257 |
| rs2968223  | 5 | 56965947 | A | 0.00052 |
| rs1835873  | 5 | 57170807 | T | 0.01037 |
| rs4541617  | 5 | 57251185 | C | 0.00408 |
| rs2910601  | 5 | 57519118 | A | 0.00221 |
| rs16888672 | 5 | 58162338 | C | 0.00192 |
| rs1498599  | 5 | 58390789 | G | 0.01076 |
| rs6877508  | 5 | 58607758 | C | 0.00006 |
| rs16889904 | 5 | 58818597 | G | 0.01003 |
| rs920190   | 5 | 58983746 | A | 0.00814 |
| rs10042020 | 5 | 59199583 | G | 0.01272 |
| rs1003219  | 5 | 59200750 | T | 0.00922 |
| rs10939851 | 5 | 59877118 | T | 0.00624 |
| rs152341   | 5 | 59881720 | T | 0.00996 |
| rs6449503  | 5 | 60131029 | A | 0.01177 |
| rs290505   | 5 | 60332313 | T | 0.00134 |
| rs11954384 | 5 | 60547184 | C | 0.00058 |
| rs581318   | 5 | 60551551 | A | 0.01476 |
| rs4582229  | 5 | 60884502 | A | 0.01279 |
| rs13177031 | 5 | 60889280 | T | 0.01253 |
| rs153385   | 5 | 60939403 | A | 0.00152 |
| rs971965   | 5 | 61597678 | T | 0.00691 |
| rs13189446 | 5 | 61608746 | G | 0.01461 |
| rs16890651 | 5 | 61665296 | G | 0.00679 |
| rs40290    | 5 | 61852899 | A | 0.01079 |
| rs2591786  | 5 | 62105308 | A | 0.00624 |
| rs7715472  | 5 | 62109454 | C | 0.00646 |



|            |   |          |   |         |
|------------|---|----------|---|---------|
| rs2642781  | 5 | 62110935 | C | 0.00672 |
| rs16892078 | 5 | 62967102 | C | 0.00346 |
| rs17484704 | 5 | 63257177 | C | 0.01217 |
| rs168558   | 5 | 63426154 | C | 3.06000 |
| rs1389864  | 5 | 63532936 | G | 0.00459 |
| rs1374031  | 5 | 63639566 | A | 0.00383 |
| rs4432837  | 5 | 63929058 | G | 0.01430 |
| rs2968199  | 5 | 64305176 | T | 0.00463 |
| rs6449781  | 5 | 64643239 | A | 7.29200 |
| rs2640717  | 5 | 64676668 | C | 0.01529 |
| rs9291837  | 5 | 64743875 | C | 6.06600 |
| rs2047064  | 5 | 64769683 | C | 0.01437 |
| rs6449791  | 5 | 65130878 | C | 0.01648 |
| rs10055584 | 5 | 65239180 | A | 0.00579 |
| rs16894638 | 5 | 65304426 | C | 0.00428 |
| rs7732890  | 5 | 65577170 | A | 0.01290 |
| rs2801646  | 5 | 65676212 | A | 0.00022 |
| rs7700850  | 5 | 65930218 | A | 0.00103 |
| rs33696    | 5 | 66114070 | G | 0.01548 |
| rs10056426 | 5 | 66239371 | G | 0.01139 |
| rs1363933  | 5 | 66279477 | A | 0.00082 |
| rs2042945  | 5 | 66506805 | G | 0.01356 |
| rs2230524  | 5 | 66514485 | G | 0.01134 |
| rs5744489  | 5 | 66522922 | T | 0.01259 |
| rs6893676  | 5 | 67589527 | C | 0.01332 |
| rs2302976  | 5 | 67605358 | G | 0.01369 |
| rs695166   | 5 | 67640384 | C | 0.00755 |
| rs440292   | 5 | 67645164 | C | 0.01039 |
| rs16897721 | 5 | 67685367 | C | 0.00074 |
| rs17324835 | 5 | 67959214 | A | 0.00265 |
| rs2607374  | 5 | 67995681 | C | 0.00486 |
| rs7721127  | 5 | 68062860 | T | 0.00639 |
| rs6891897  | 5 | 68078239 | A | 0.00956 |
| rs2451819  | 5 | 68100520 | A | 0.00363 |
| rs1427906  | 5 | 68166377 | G | 0.01209 |
| rs41393950 | 5 | 70994601 | A | 0.00580 |
| rs1217778  | 5 | 71402652 | T | 0.01449 |
| rs1217782  | 5 | 71402819 | G | 0.01369 |
| rs4703855  | 5 | 71729655 | C | 0.00163 |
| rs4703908  | 5 | 71802603 | G | 0.01474 |
| rs406813   | 5 | 71873362 | G | 0.00158 |
| rs10061469 | 5 | 72553904 | C | 0.00996 |
| rs343112   | 5 | 72916455 | A | 0.01368 |
| rs17552447 | 5 | 73037135 | G | 0.00570 |

|            |   |          |   |          |
|------------|---|----------|---|----------|
| rs716707   | 5 | 73133625 | G | 0.00352  |
| rs1018119  | 5 | 74922140 | G | 0.00998  |
| rs34354    | 5 | 75089238 | G | 0.01436  |
| rs4704267  | 5 | 75259821 | G | 0.01193  |
| rs11741865 | 5 | 75532899 | A | 0.00879  |
| rs246807   | 5 | 75677786 | T | 0.01021  |
| rs17748061 | 5 | 75867612 | T | 0.00682  |
| rs406217   | 5 | 75962783 | G | 0.00187  |
| rs7721799  | 5 | 76286134 | G | 0.00117  |
| rs3762982  | 5 | 76359244 | T | 0.00425  |
| rs13160107 | 5 | 76753339 | T | 0.01486  |
| rs335628   | 5 | 76765294 | C | 0.00259  |
| rs3797642  | 5 | 76784682 | T | 0.00808  |
| rs254378   | 5 | 77093252 | T | 0.00215  |
| rs254411   | 5 | 77115613 | A | 0.00724  |
| rs2028596  | 5 | 77206506 | G | 0.01437  |
| rs10447178 | 5 | 77224047 | G | 0.00866  |
| rs10068036 | 5 | 77612443 | C | 0.00187  |
| rs1560198  | 5 | 77804349 | G | 0.00975  |
| rs10052968 | 5 | 77939018 | G | 0.00672  |
| rs10514108 | 5 | 78141103 | T | 0.01648  |
| rs12054837 | 5 | 78142127 | C | 0.00699  |
| rs12153089 | 5 | 78303950 | T | 0.01625  |
| rs6453423  | 5 | 78304645 | T | 0.00116  |
| rs6897944  | 5 | 78306219 | A | 16.14800 |
| rs2909854  | 5 | 78465469 | G | 0.00927  |
| rs16876720 | 5 | 78696992 | C | 0.01000  |
| rs2404150  | 5 | 78735782 | A | 5.18600  |
| rs7709092  | 5 | 78749824 | A | 0.00414  |
| rs264995   | 5 | 79199168 | C | 0.00067  |
| rs16877612 | 5 | 79551044 | T | 0.00188  |
| rs6151892  | 5 | 80154637 | A | 0.01382  |
| rs34122    | 5 | 80473812 | A | 0.01337  |
| rs4703516  | 5 | 80690722 | A | 0.00197  |
| rs10474035 | 5 | 80962576 | A | 0.00718  |
| rs401654   | 5 | 81104103 | A | 0.00822  |
| rs6452435  | 5 | 81238737 | A | 0.01496  |
| rs224963   | 5 | 81729650 | G | 0.00262  |
| rs6876647  | 5 | 81956240 | G | 0.00741  |
| rs9293317  | 5 | 82192914 | A | 0.01223  |
| rs33596    | 5 | 82783992 | A | 0.00709  |
| rs28296    | 5 | 82795773 | G | 0.01077  |
| rs1193353  | 5 | 82866432 | A | 0.00110  |
| rs309586   | 5 | 82893803 | A | 0.01402  |

|            |   |          |   |         |
|------------|---|----------|---|---------|
| rs2301103  | 5 | 83466967 | A | 0.01312 |
| rs10462409 | 5 | 83757549 | C | 0.00894 |
| rs12515472 | 5 | 84234018 | G | 0.01091 |
| rs7446072  | 5 | 84545996 | G | 0.00006 |
| rs6452647  | 5 | 84576005 | G | 0.01026 |
| rs2931116  | 5 | 84639708 | C | 0.01282 |
| rs307311   | 5 | 84729376 | A | 0.01365 |
| rs467359   | 5 | 84869510 | C | 0.00916 |
| rs2898534  | 5 | 85267170 | A | 0.00271 |
| rs12521073 | 5 | 85303222 | T | 0.00946 |
| rs4457115  | 5 | 85642438 | C | 0.00473 |
| rs13174529 | 5 | 86078043 | A | 0.01527 |
| rs7708890  | 5 | 87213272 | T | 0.00167 |
| rs6877822  | 5 | 87433316 | T | 0.00051 |
| rs12654053 | 5 | 87828240 | A | 0.01509 |
| rs324889   | 5 | 87943259 | T | 0.00102 |
| rs4916663  | 5 | 88338086 | T | 7.59400 |
| rs6452806  | 5 | 88355663 | A | 8.95800 |
| rs1427967  | 5 | 88364322 | C | 7.39200 |
| rs13185032 | 5 | 88364920 | C | 0.00844 |
| rs1159666  | 5 | 88370749 | C | 0.01183 |
| rs9986241  | 5 | 88409794 | G | 0.00184 |
| rs4916669  | 5 | 88428880 | G | 9.03500 |
| rs9293511  | 5 | 88452110 | A | 0.00580 |
| rs1852721  | 5 | 88823450 | G | 0.00415 |
| rs6452825  | 5 | 88824241 | G | 0.01166 |
| rs10474312 | 5 | 89312242 | C | 0.00570 |
| rs818944   | 5 | 89400075 | A | 0.00462 |
| rs157559   | 5 | 89425015 | C | 0.01517 |
| rs924628   | 5 | 89440658 | A | 0.01273 |
| rs7349816  | 5 | 89687355 | G | 0.01150 |
| rs4916821  | 5 | 90126155 | G | 0.00148 |
| rs4916858  | 5 | 90637046 | C | 0.00140 |
| rs1862555  | 5 | 91293683 | G | 0.01050 |
| rs10037896 | 5 | 91580040 | G | 0.00540 |
| rs13189339 | 5 | 91659328 | T | 0.00885 |
| rs4434363  | 5 | 92620422 | T | 0.01053 |
| rs6557074  | 5 | 92637414 | C | 0.00650 |
| rs10060331 | 5 | 93045806 | T | 0.00440 |
| rs2344918  | 5 | 93147477 | T | 0.00884 |
| rs7378943  | 5 | 93574048 | G | 0.00738 |
| rs981862   | 5 | 93641222 | A | 0.00659 |
| rs2160758  | 5 | 93806178 | A | 0.01534 |
| rs13178274 | 5 | 93807278 | C | 0.01007 |

|            |   |           |   |         |
|------------|---|-----------|---|---------|
| rs9285014  | 5 | 93821888  | T | 0.00808 |
| rs17084109 | 5 | 94179269  | C | 0.01043 |
| rs40590    | 5 | 94248164  | G | 0.01192 |
| rs2731823  | 5 | 94756335  | T | 0.00663 |
| rs3777190  | 5 | 95273728  | G | 0.00836 |
| rs17473575 | 5 | 95875079  | A | 0.00748 |
| rs6877870  | 5 | 95907773  | A | 0.00038 |
| rs26503    | 5 | 96104065  | C | 0.00019 |
| rs42398    | 5 | 96146211  | C | 0.00420 |
| rs34735    | 5 | 96191820  | G | 0.00527 |
| rs316223   | 5 | 96439423  | G | 0.00034 |
| rs7701806  | 5 | 96701855  | T | 0.00404 |
| rs291827   | 5 | 96783901  | G | 0.00889 |
| rs11135533 | 5 | 97240561  | C | 0.01248 |
| rs17653177 | 5 | 97290848  | C | 2.57400 |
| rs469930   | 5 | 97997020  | C | 0.01394 |
| rs330419   | 5 | 98221064  | A | 0.00938 |
| rs1916599  | 5 | 98802139  | G | 0.00479 |
| rs2511902  | 5 | 98802264  | T | 0.01258 |
| rs2461991  | 5 | 98821231  | C | 0.00586 |
| rs2461953  | 5 | 98848971  | C | 0.00009 |
| rs681634   | 5 | 98959050  | G | 0.01078 |
| rs1462419  | 5 | 99080579  | G | 0.01109 |
| rs7447852  | 5 | 99152807  | C | 0.00420 |
| rs11241243 | 5 | 99172882  | G | 0.00042 |
| rs6878343  | 5 | 99181038  | T | 0.01020 |
| rs3844092  | 5 | 99249586  | A | 0.00693 |
| rs3844091  | 5 | 99249653  | T | 0.01430 |
| rs4455602  | 5 | 99249738  | T | 0.00678 |
| rs2924611  | 5 | 99278995  | G | 0.00074 |
| rs10054412 | 5 | 99332774  | G | 0.00490 |
| rs10070116 | 5 | 99350463  | G | 0.01133 |
| rs11948786 | 5 | 99379483  | G | 0.00799 |
| rs17164397 | 5 | 99411368  | C | 0.01126 |
| rs1847522  | 5 | 99596439  | A | 0.00620 |
| rs1824780  | 5 | 99671978  | A | 0.00517 |
| rs2120913  | 5 | 100096374 | G | 0.01601 |
| rs279095   | 5 | 100100985 | G | 0.00952 |
| rs2544914  | 5 | 100211413 | T | 0.01365 |
| rs1833862  | 5 | 100271404 | T | 0.00701 |
| rs2048525  | 5 | 100518871 | A | 0.01341 |
| rs17257221 | 5 | 101044509 | A | 0.01135 |
| rs6887208  | 5 | 101405943 | T | 0.00309 |
| rs11747250 | 5 | 101451626 | G | 0.01337 |

|            |   |           |   |         |
|------------|---|-----------|---|---------|
| rs1376896  | 5 | 101774746 | G | 0.00827 |
| rs17333350 | 5 | 101842508 | T | 0.00813 |
| rs3105476  | 5 | 101980425 | T | 0.00445 |
| rs3756583  | 5 | 102361943 | A | 0.00108 |
| rs34823    | 5 | 102466190 | T | 0.00089 |
| rs34767    | 5 | 102517410 | A | 0.00927 |
| rs4703253  | 5 | 102920123 | C | 0.01467 |
| rs2545657  | 5 | 103056635 | T | 0.00786 |
| rs4703022  | 5 | 103367627 | C | 0.01638 |
| rs6887182  | 5 | 103415779 | T | 0.00600 |
| rs1420864  | 5 | 103445285 | T | 0.00706 |
| rs2707407  | 5 | 103482656 | A | 0.01406 |
| rs17156145 | 5 | 103492704 | G | 0.01395 |
| rs1530303  | 5 | 103751354 | T | 0.01569 |
| rs6892243  | 5 | 104206688 | C | 0.01025 |
| rs1708591  | 5 | 104230671 | A | 0.01389 |
| rs4373259  | 5 | 104839516 | A | 0.01330 |
| rs286725   | 5 | 105165477 | G | 0.00707 |
| rs11739968 | 5 | 105472939 | T | 0.01497 |
| rs11242576 | 5 | 105646376 | A | 0.01655 |
| rs7718256  | 5 | 105649051 | C | 0.00190 |
| rs1561350  | 5 | 106117493 | A | 0.00654 |
| rs17159340 | 5 | 106309005 | A | 0.01426 |
| rs365807   | 5 | 106741517 | A | 0.00431 |
| rs252818   | 5 | 106753590 | C | 0.01497 |
| rs395561   | 5 | 106889874 | A | 0.00537 |
| rs17160261 | 5 | 106982444 | A | 0.00553 |
| rs13361436 | 5 | 107039611 | A | 0.00104 |
| rs3846694  | 5 | 107194401 | G | 0.00074 |
| rs7730156  | 5 | 107227719 | T | 0.01508 |
| rs13157529 | 5 | 107348781 | C | 0.01028 |
| rs6897334  | 5 | 109072457 | G | 0.00482 |
| rs7711326  | 5 | 109203522 | A | 0.01279 |
| rs2007136  | 5 | 109220135 | A | 0.01175 |
| rs1368356  | 5 | 109223156 | A | 0.00168 |
| rs245243   | 5 | 109258634 | T | 0.00590 |
| rs42924    | 5 | 109272818 | G | 0.00045 |
| rs6862355  | 5 | 109279160 | G | 0.01270 |
| rs5023585  | 5 | 109381500 | G | 0.01276 |
| rs9790859  | 5 | 109606900 | T | 0.01028 |
| rs2162747  | 5 | 110755526 | A | 0.00084 |
| rs17458866 | 5 | 110875631 | C | 0.00753 |
| rs3923455  | 5 | 111627022 | T | 0.01312 |
| rs6594630  | 5 | 111960644 | C | 0.01154 |

|            |   |           |   |         |
|------------|---|-----------|---|---------|
| rs7732983  | 5 | 111976016 | G | 0.00787 |
| rs7731890  | 5 | 112414116 | C | 0.00518 |
| rs10072756 | 5 | 113023674 | A | 0.01609 |
| rs7737426  | 5 | 114536487 | T | 0.00464 |
| rs265411   | 5 | 114553909 | T | 0.00078 |
| rs2605177  | 5 | 114744901 | A | 0.00713 |
| rs256989   | 5 | 114939464 | C | 0.00602 |
| rs10079000 | 5 | 114968099 | C | 0.01179 |
| rs10055339 | 5 | 115001019 | T | 0.01343 |
| rs6881698  | 5 | 115278171 | A | 0.01549 |
| rs17138649 | 5 | 115374751 | C | 0.01641 |
| rs2136210  | 5 | 115412245 | T | 0.00113 |
| rs250323   | 5 | 115674895 | G | 0.00597 |
| rs1073205  | 5 | 115689716 | A | 0.01201 |
| rs17431959 | 5 | 115815033 | G | 0.01434 |
| rs2964653  | 5 | 116056539 | G | 0.01076 |
| rs698384   | 5 | 116228753 | G | 0.00577 |
| rs6594987  | 5 | 116256211 | T | 0.01625 |
| rs7706388  | 5 | 116292986 | A | 0.01479 |
| rs265899   | 5 | 116915922 | T | 0.01439 |
| rs265900   | 5 | 116916065 | A | 0.00995 |
| rs267074   | 5 | 116952228 | G | 0.00116 |
| rs371616   | 5 | 117001959 | A | 0.01069 |
| rs10037966 | 5 | 117382088 | T | 0.01155 |
| rs7726317  | 5 | 117949143 | A | 0.00814 |
| rs11952762 | 5 | 118383450 | G | 0.00230 |
| rs1597713  | 5 | 119030246 | T | 0.00486 |
| rs190489   | 5 | 119123481 | T | 0.01280 |
| rs12658673 | 5 | 119715531 | G | 0.00924 |
| rs6595233  | 5 | 119796305 | G | 0.00877 |
| rs1375466  | 5 | 120026907 | G | 0.00446 |
| rs11953153 | 5 | 120303966 | T | 0.00658 |
| rs13153260 | 5 | 120543052 | C | 0.01065 |
| rs607107   | 5 | 120630294 | C | 0.01565 |
| rs10038048 | 5 | 120908249 | A | 0.00953 |
| rs4547952  | 5 | 120936455 | G | 0.00940 |
| rs17148409 | 5 | 121146481 | C | 0.01636 |
| rs10073705 | 5 | 121149163 | G | 0.01161 |
| rs17149128 | 5 | 121757816 | A | 0.00663 |
| rs12719304 | 5 | 121762292 | G | 0.01266 |
| rs10066937 | 5 | 121778228 | G | 0.00821 |
| rs9327254  | 5 | 121910770 | A | 0.01437 |
| rs4438871  | 5 | 121923676 | C | 0.01562 |
| rs13169898 | 5 | 122011450 | C | 0.00644 |

|            |   |           |   |         |
|------------|---|-----------|---|---------|
| rs982926   | 5 | 122382791 | G | 0.00204 |
| rs458158   | 5 | 122510080 | C | 0.01188 |
| rs335207   | 5 | 122532133 | C | 0.00513 |
| rs11241714 | 5 | 123151584 | T | 0.00300 |
| rs6889859  | 5 | 123176800 | G | 0.00903 |
| rs3909329  | 5 | 123196141 | C | 0.01449 |
| rs2244177  | 5 | 123344476 | G | 0.00383 |
| rs10055109 | 5 | 123448411 | T | 0.01429 |
| rs1457690  | 5 | 123501287 | C | 0.00141 |
| rs12520962 | 5 | 123981123 | G | 0.00901 |
| rs6871217  | 5 | 123988346 | A | 0.01314 |
| rs13359971 | 5 | 124269512 | C | 0.00532 |
| rs4458563  | 5 | 124304963 | G | 0.00395 |
| rs3932131  | 5 | 124763822 | A | 0.01631 |
| rs7707807  | 5 | 124927142 | G | 0.01574 |
| rs963445   | 5 | 125046256 | G | 0.00280 |
| rs327852   | 5 | 125290241 | A | 0.00009 |
| rs326022   | 5 | 125306885 | A | 0.00563 |
| rs17165007 | 5 | 125337442 | C | 0.00959 |
| rs13180385 | 5 | 125338678 | G | 0.00875 |
| rs4836240  | 5 | 125354492 | T | 0.01011 |
| rs17584191 | 5 | 125561029 | T | 0.01367 |
| rs11738463 | 5 | 125707638 | A | 0.00329 |
| rs6595708  | 5 | 125823124 | T | 0.00190 |
| rs26946    | 5 | 126717388 | T | 0.01529 |
| rs806100   | 5 | 127496076 | G | 0.00388 |
| rs13361165 | 5 | 130442705 | C | 0.00703 |
| rs17132127 | 5 | 131314824 | A | 0.00771 |
| rs77938    | 5 | 131350393 | T | 0.01610 |
| rs152125   | 5 | 131455060 | G | 0.00495 |
| rs2306772  | 5 | 131703880 | T | 0.00689 |
| rs2631362  | 5 | 131735192 | A | 0.01434 |
| rs803223   | 5 | 132236262 | G | 0.01442 |
| rs3798128  | 5 | 132258930 | T | 0.00595 |
| rs6876812  | 5 | 132484085 | A | 0.01570 |
| rs10515458 | 5 | 132697894 | T | 0.01440 |
| rs4958122  | 5 | 132732003 | C | 0.01136 |
| rs250856   | 5 | 132756827 | G | 0.00659 |
| rs9686131  | 5 | 132922095 | T | 0.00865 |
| rs11739949 | 5 | 133029830 | A | 0.00368 |
| rs6596147  | 5 | 133075674 | T | 0.01233 |
| rs7719165  | 5 | 133104797 | G | 0.01421 |
| rs10078111 | 5 | 133211769 | A | 0.01575 |
| rs7735912  | 5 | 133554588 | C | 0.00921 |

|            |   |           |   |         |
|------------|---|-----------|---|---------|
| rs17167478 | 5 | 133731491 | A | 0.00308 |
| rs646506   | 5 | 134486807 | T | 0.01191 |
| rs703254   | 5 | 134758142 | A | 0.01006 |
| rs3860110  | 5 | 134896238 | T | 0.00488 |
| rs2344485  | 5 | 134896540 | C | 0.00595 |
| rs6858990  | 5 | 134972046 | A | 0.01088 |
| rs7709847  | 5 | 135036890 | T | 0.01534 |
| rs7710084  | 5 | 135037127 | C | 0.01340 |
| rs6877327  | 5 | 135047070 | C | 0.00243 |
| rs4288109  | 5 | 135056220 | G | 0.01378 |
| rs11242261 | 5 | 135056573 | A | 0.00523 |
| rs17169348 | 5 | 135264117 | T | 0.00870 |
| rs17598926 | 5 | 135325449 | G | 0.01660 |
| rs2428158  | 5 | 135341751 | C | 0.00246 |
| rs30757    | 5 | 135383122 | A | 0.00631 |
| rs17170027 | 5 | 135641325 | C | 0.01355 |
| rs7701815  | 5 | 135649997 | C | 0.01150 |
| rs11958545 | 5 | 135651835 | T | 0.01153 |
| rs3822748  | 5 | 135693248 | C | 0.01244 |
| rs346643   | 5 | 135745093 | C | 0.01164 |
| rs10075735 | 5 | 136028836 | T | 0.01100 |
| rs7724748  | 5 | 136219411 | G | 0.00850 |
| rs7727317  | 5 | 136538565 | C | 0.00679 |
| rs17778739 | 5 | 136579897 | C | 0.01151 |
| rs1229728  | 5 | 136714733 | T | 0.01503 |
| rs6596396  | 5 | 136949515 | C | 0.00839 |
| rs757647   | 5 | 137735214 | A | 0.00343 |
| rs4835678  | 5 | 137736333 | A | 0.00318 |
| rs17118468 | 5 | 139204919 | C | 0.01364 |
| rs2910339  | 5 | 140614479 | A | 0.00175 |
| rs251177   | 5 | 141007068 | C | 0.00289 |
| rs248626   | 5 | 141077909 | A | 0.00631 |
| rs17097850 | 5 | 141273771 | C | 0.00007 |
| rs3850578  | 5 | 141515756 | T | 0.00158 |
| rs58644    | 5 | 141772011 | T | 0.01353 |
| rs33970    | 5 | 141914901 | A | 0.00312 |
| rs17099407 | 5 | 142080985 | A | 0.01518 |
| rs258759   | 5 | 142536786 | T | 0.01154 |
| rs1644431  | 5 | 142963981 | A | 0.00210 |
| rs1421776  | 5 | 143230072 | T | 0.01278 |
| rs312634   | 5 | 143380861 | T | 0.00932 |
| rs309328   | 5 | 143398614 | T | 0.01281 |
| rs17101705 | 5 | 143558959 | T | 0.01154 |
| rs34463305 | 5 | 143884468 | T | 0.00121 |



|            |   |           |   |         |
|------------|---|-----------|---|---------|
| rs6870605  | 5 | 143900921 | A | 0.01531 |
| rs11741041 | 5 | 144314948 | A | 0.00807 |
| rs11741672 | 5 | 144338909 | G | 0.00213 |
| rs6580376  | 5 | 144845810 | A | 0.00875 |
| rs11745319 | 5 | 145190785 | C | 0.01546 |
| rs385175   | 5 | 145191281 | A | 0.00795 |
| rs417215   | 5 | 145191308 | A | 0.00248 |
| rs12518731 | 5 | 145343055 | G | 0.01150 |
| rs17104321 | 5 | 145582091 | C | 0.00224 |
| rs17104331 | 5 | 145593015 | G | 0.01426 |
| rs17104362 | 5 | 145630790 | G | 0.00702 |
| rs10515569 | 5 | 145712753 | G | 0.01381 |
| rs997011   | 5 | 145752014 | C | 0.00215 |
| rs6580417  | 5 | 145753403 | A | 0.00937 |
| rs7717315  | 5 | 145881372 | G | 0.00658 |
| rs6881391  | 5 | 145899863 | G | 0.00851 |
| rs460781   | 5 | 146014684 | C | 0.01597 |
| rs460413   | 5 | 146014728 | T | 0.01494 |
| rs458164   | 5 | 146023125 | A | 0.01228 |
| rs182697   | 5 | 146027384 | G | 0.01443 |
| rs462706   | 5 | 146034170 | G | 0.00966 |
| rs464459   | 5 | 146034654 | G | 0.01429 |
| rs10061370 | 5 | 146048554 | C | 0.01207 |
| rs2400228  | 5 | 146049791 | T | 0.00541 |
| rs7716683  | 5 | 146060205 | A | 0.01332 |
| rs2926170  | 5 | 146292592 | T | 0.00634 |
| rs17106458 | 5 | 146693780 | C | 0.01347 |
| rs10079191 | 5 | 146696881 | A | 0.01413 |
| rs6884181  | 5 | 146703083 | G | 0.01149 |
| rs918797   | 5 | 146708683 | A | 0.01576 |
| rs4705166  | 5 | 146709417 | G | 0.00239 |
| rs2288806  | 5 | 146755668 | T | 0.00949 |
| rs17550470 | 5 | 146759060 | T | 0.01007 |
| rs12655364 | 5 | 146759414 | T | 0.00693 |
| rs3805536  | 5 | 146763849 | C | 0.00364 |
| rs1529688  | 5 | 146999957 | C | 0.00111 |
| rs41358349 | 5 | 147537135 | G | 0.01243 |
| rs250674   | 5 | 148418790 | A | 0.00597 |
| rs17110060 | 5 | 148780327 | T | 0.00680 |
| rs7719910  | 5 | 149426180 | A | 0.01219 |
| rs6579777  | 5 | 149561423 | A | 0.00288 |
| rs17111053 | 5 | 149575303 | A | 0.01245 |
| rs4958469  | 5 | 149585309 | A | 0.00978 |
| rs4246045  | 5 | 150157290 | C | 0.00202 |

|            |   |           |   |         |
|------------|---|-----------|---|---------|
| rs17716141 | 5 | 150622548 | A | 0.00342 |
| rs1368369  | 5 | 150948496 | A | 0.01591 |
| rs154696   | 5 | 151436036 | T | 0.00113 |
| rs29849    | 5 | 151443684 | A | 0.00977 |
| rs159822   | 5 | 151447865 | A | 0.00836 |
| rs4639211  | 5 | 151563603 | G | 0.00508 |
| rs4443412  | 5 | 151638395 | A | 0.00806 |
| rs9324721  | 5 | 151645382 | T | 0.00548 |
| rs12654099 | 5 | 151880567 | A | 0.00444 |
| rs4475248  | 5 | 151892892 | C | 0.01210 |
| rs11959980 | 5 | 151970674 | C | 0.01454 |
| rs7733725  | 5 | 151991698 | G | 0.00308 |
| rs17565505 | 5 | 152044626 | G | 0.00577 |
| rs12518989 | 5 | 152211517 | G | 0.00849 |
| rs4958596  | 5 | 152307861 | A | 0.01071 |
| rs17578068 | 5 | 152469215 | A | 0.01472 |
| rs13173299 | 5 | 152488109 | A | 0.00143 |
| rs17503275 | 5 | 152568409 | A | 0.00577 |
| rs10477084 | 5 | 153090050 | A | 0.00904 |
| rs7711124  | 5 | 153123087 | C | 0.00184 |
| rs2614125  | 5 | 153247946 | G | 0.00111 |
| rs898709   | 5 | 153267157 | A | 0.01662 |
| rs2614123  | 5 | 153280408 | G | 0.01425 |
| rs27154    | 5 | 153722036 | A | 0.00594 |
| rs286596   | 5 | 154327177 | T | 0.00696 |
| rs17116724 | 5 | 154401432 | G | 0.00666 |
| rs6580138  | 5 | 154469281 | T | 0.00989 |
| rs6875111  | 5 | 155186458 | T | 0.01593 |
| rs1347118  | 5 | 155394838 | T | 0.00999 |
| rs157337   | 5 | 156063829 | T | 0.01032 |
| rs6555827  | 5 | 156425016 | C | 0.01474 |
| rs3777059  | 5 | 157170036 | A | 0.00461 |
| rs2650359  | 5 | 157199237 | T | 0.00748 |
| rs1173481  | 5 | 157492557 | T | 0.00932 |
| rs10065017 | 5 | 157738982 | G | 0.00324 |
| rs17055538 | 5 | 157744807 | A | 0.01626 |
| rs2963478  | 5 | 157925272 | A | 0.00247 |
| rs2420211  | 5 | 158098219 | A | 0.00863 |
| rs1368298  | 5 | 158137003 | C | 0.01576 |
| rs1549883  | 5 | 158159232 | T | 0.00844 |
| rs4704963  | 5 | 158179956 | C | 0.01209 |
| rs4704967  | 5 | 158192277 | T | 0.00181 |
| rs10056564 | 5 | 158193834 | C | 0.00847 |
| rs13171583 | 5 | 158201332 | G | 0.01553 |

|            |   |           |   |         |
|------------|---|-----------|---|---------|
| rs10054046 | 5 | 158242261 | T | 0.00541 |
| rs194229   | 5 | 158600287 | G | 0.00582 |
| rs3846687  | 5 | 158612157 | G | 0.00994 |
| rs6888934  | 5 | 158864376 | G | 0.01501 |
| rs7737796  | 5 | 159302007 | C | 0.00083 |
| rs9313851  | 5 | 159908441 | C | 0.00787 |
| rs7707116  | 5 | 159912956 | G | 0.01576 |
| rs10515822 | 5 | 160512672 | T | 0.00093 |
| rs455707   | 5 | 160545772 | A | 0.01621 |
| rs456582   | 5 | 160546334 | C | 0.01529 |
| rs609651   | 5 | 160562804 | T | 0.01599 |
| rs17059065 | 5 | 160581664 | A | 0.01547 |
| rs6893149  | 5 | 161035720 | A | 0.00961 |
| rs7730014  | 5 | 161609374 | A | 0.01554 |
| rs2913561  | 5 | 162581271 | T | 0.01113 |
| rs17061334 | 5 | 162583830 | A | 0.00975 |
| rs2059796  | 5 | 162592782 | A | 0.00432 |
| rs300196   | 5 | 162631659 | T | 0.01133 |
| rs6880977  | 5 | 162991701 | A | 0.01048 |
| rs17285868 | 5 | 163631534 | A | 0.00795 |
| rs2963133  | 5 | 164146342 | G | 0.00115 |
| rs1421681  | 5 | 164440850 | T | 0.01384 |
| rs2133726  | 5 | 165695838 | T | 0.00740 |
| rs1392384  | 5 | 165727152 | A | 0.00902 |
| rs1353943  | 5 | 165771085 | C | 0.01141 |
| rs6872688  | 5 | 166292646 | C | 0.00492 |
| rs17495541 | 5 | 166572579 | G | 0.01396 |
| rs17436436 | 5 | 167298017 | C | 0.00555 |
| rs1432821  | 5 | 167496163 | T | 0.01221 |
| rs11949188 | 5 | 167680766 | T | 0.01222 |
| rs1120242  | 5 | 168005933 | G | 0.00101 |
| rs12659534 | 5 | 168162396 | C | 0.01255 |
| rs1109106  | 5 | 168177820 | T | 0.01657 |
| rs17666252 | 5 | 168226924 | T | 0.00097 |
| rs6897408  | 5 | 168238733 | T | 0.00880 |
| rs11739950 | 5 | 168346952 | G | 0.00567 |
| rs8180402  | 5 | 168576631 | C | 0.00877 |
| rs2080865  | 5 | 168636725 | A | 0.01520 |
| rs2338656  | 5 | 168787116 | C | 0.00732 |
| rs39797    | 5 | 168796010 | G | 0.00448 |
| rs1182093  | 5 | 169311377 | A | 0.00270 |
| rs9313476  | 5 | 169336666 | A | 0.00105 |
| rs9313523  | 5 | 170119753 | C | 0.00775 |
| rs10475958 | 5 | 170130357 | A | 0.00144 |

|            |   |           |   |         |
|------------|---|-----------|---|---------|
| rs10475959 | 5 | 170130444 | C | 0.00948 |
| rs33855    | 5 | 171124642 | T | 0.01455 |
| rs17074274 | 5 | 171436401 | G | 0.01110 |
| rs9313575  | 5 | 171437235 | A | 0.01094 |
| rs1368430  | 5 | 171884506 | G | 0.01271 |
| rs11741273 | 5 | 171884740 | G | 0.01238 |
| rs17075007 | 5 | 171964153 | C | 0.00485 |
| rs17075979 | 5 | 172824632 | T | 0.00908 |
| rs4867725  | 5 | 173021733 | G | 0.01072 |
| rs3849725  | 5 | 173224859 | C | 0.00930 |
| rs11749360 | 5 | 174030069 | C | 0.00038 |
| rs6887241  | 5 | 175193682 | T | 0.00721 |
| rs17065614 | 5 | 175248681 | G | 0.00387 |
| rs2973677  | 5 | 177693942 | G | 0.01456 |
| rs2672816  | 5 | 177873238 | C | 0.00472 |
| rs262048   | 5 | 177939603 | A | 0.00533 |
| rs10479505 | 5 | 178098466 | T | 0.00349 |
| rs10903230 | 5 | 178140271 | A | 0.00014 |
| rs2645339  | 5 | 178348669 | C | 0.00834 |
| rs443725   | 5 | 178730443 | T | 0.00838 |
| rs2450484  | 5 | 179192448 | G | 0.00133 |
| rs17627880 | 5 | 179626784 | A | 0.00361 |
| rs7709026  | 5 | 179849353 | G | 0.00933 |
| rs10479581 | 5 | 180097973 | A | 0.01256 |
| rs41330745 | 5 | 180206066 | A | 0.00080 |
| rs34327863 | 5 | 180207008 | C | 0.00656 |
| rs6939620  | 6 | 384183    | T | 0.00654 |
| rs2316795  | 6 | 405732    | A | 0.00022 |
| rs4959928  | 6 | 417807    | C | 0.00365 |
| rs17133849 | 6 | 421395    | G | 0.00487 |
| rs2473488  | 6 | 489239    | G | 0.00898 |
| rs845897   | 6 | 953367    | G | 0.00476 |
| rs7754106  | 6 | 1068382   | G | 0.00670 |
| rs11242676 | 6 | 1264005   | A | 0.01552 |
| rs9405136  | 6 | 1293230   | T | 0.01551 |
| rs9405506  | 6 | 1653870   | G | 0.00257 |
| rs9392353  | 6 | 1966707   | G | 0.00216 |
| rs11242735 | 6 | 2000676   | C | 0.01409 |
| rs3823287  | 6 | 2189720   | A | 0.00839 |
| rs9328087  | 6 | 2210343   | G | 0.00955 |
| rs2479008  | 6 | 2292807   | C | 0.01040 |
| rs4413658  | 6 | 2313641   | A | 0.00712 |
| rs17135328 | 6 | 2564712   | A | 0.00346 |
| rs6930270  | 6 | 2678774   | C | 6.92000 |

|            |   |          |   |         |
|------------|---|----------|---|---------|
| rs9392436  | 6 | 2816084  | G | 6.13100 |
| rs7757819  | 6 | 2863546  | G | 0.01522 |
| rs4149361  | 6 | 2951984  | C | 0.00078 |
| rs9503499  | 6 | 3200856  | T | 0.01459 |
| rs7747817  | 6 | 3298526  | G | 0.00448 |
| rs1887843  | 6 | 3299260  | G | 0.00375 |
| rs4959288  | 6 | 4358975  | G | 0.01502 |
| rs1265236  | 6 | 4444771  | T | 0.01197 |
| rs84996    | 6 | 4504209  | C | 0.00922 |
| rs9392668  | 6 | 5238939  | A | 0.01607 |
| rs9328294  | 6 | 5239371  | A | 0.01021 |
| rs17140654 | 6 | 5451840  | A | 0.00096 |
| rs7746914  | 6 | 5565992  | T | 0.00971 |
| rs877010   | 6 | 5624225  | G | 0.00692 |
| rs126456   | 6 | 6654484  | A | 0.00743 |
| rs6929018  | 6 | 6818697  | C | 0.00905 |
| rs665723   | 6 | 7084063  | A | 0.00677 |
| rs9328425  | 6 | 7414231  | G | 0.01486 |
| rs2806187  | 6 | 7446348  | A | 0.01600 |
| rs267184   | 6 | 7778428  | C | 0.01239 |
| rs155476   | 6 | 7906188  | G | 0.00517 |
| rs9393054  | 6 | 8592441  | T | 0.01024 |
| rs10484330 | 6 | 8980683  | T | 0.01320 |
| rs9379680  | 6 | 9404897  | T | 0.01472 |
| rs1410364  | 6 | 9837105  | T | 0.00664 |
| rs7765635  | 6 | 9859151  | G | 0.01048 |
| rs855375   | 6 | 9930143  | T | 0.00292 |
| rs4712384  | 6 | 10269797 | C | 0.00649 |
| rs3734397  | 6 | 11090834 | C | 0.00958 |
| rs7452101  | 6 | 11261838 | C | 0.01520 |
| rs9468726  | 6 | 11374928 | C | 0.00293 |
| rs17764967 | 6 | 11598841 | G | 0.00481 |
| rs505685   | 6 | 11631872 | T | 0.01239 |
| rs2235418  | 6 | 11840809 | T | 0.01461 |
| rs7741952  | 6 | 11986230 | T | 0.00936 |
| rs17616767 | 6 | 12870640 | A | 0.01105 |
| rs9396412  | 6 | 14096729 | C | 0.00880 |
| rs9382937  | 6 | 14191042 | A | 0.00310 |
| rs6459366  | 6 | 14692375 | T | 0.01087 |
| rs857464   | 6 | 14715101 | A | 0.00081 |
| rs17450822 | 6 | 14748578 | G | 0.00951 |
| rs2500065  | 6 | 14844570 | G | 0.00020 |
| rs9396529  | 6 | 14844629 | C | 0.01518 |
| rs9382996  | 6 | 14847961 | T | 0.00001 |

|            |   |          |   |         |
|------------|---|----------|---|---------|
| rs2747507  | 6 | 15200644 | T | 0.00715 |
| rs808361   | 6 | 15988357 | G | 0.00505 |
| rs11963956 | 6 | 16286779 | A | 0.01118 |
| rs2327951  | 6 | 16303287 | A | 0.00922 |
| rs2143452  | 6 | 16520903 | G | 0.00054 |
| rs10484364 | 6 | 16661431 | T | 0.00798 |
| rs1570487  | 6 | 16791838 | T | 0.00191 |
| rs10456788 | 6 | 16858835 | C | 0.01152 |
| rs7382853  | 6 | 17045787 | A | 0.00001 |
| rs1570241  | 6 | 17054324 | T | 0.00194 |
| rs1324145  | 6 | 17268036 | T | 0.00829 |
| rs9367945  | 6 | 17288278 | G | 0.00482 |
| rs7765428  | 6 | 18033405 | T | 0.00847 |
| rs1570683  | 6 | 18447773 | A | 0.00294 |
| rs568108   | 6 | 18536837 | A | 0.00991 |
| rs577287   | 6 | 18553773 | A | 0.00396 |
| rs10456830 | 6 | 18560597 | A | 0.00307 |
| rs9297082  | 6 | 18642317 | A | 0.01574 |
| rs11968659 | 6 | 18772640 | T | 0.01217 |
| rs4610574  | 6 | 19244130 | T | 0.01223 |
| rs10946315 | 6 | 19506312 | A | 0.01212 |
| rs9358264  | 6 | 19814250 | C | 0.00669 |
| rs9460408  | 6 | 19847922 | C | 0.01603 |
| rs9366344  | 6 | 20435828 | T | 0.00324 |
| rs9358331  | 6 | 20452975 | A | 0.00743 |
| rs9356730  | 6 | 20453095 | G | 0.01619 |
| rs9348440  | 6 | 20749315 | A | 0.00454 |
| rs6456397  | 6 | 21227109 | G | 0.01371 |
| rs2493869  | 6 | 21243137 | T | 0.00985 |
| rs9295495  | 6 | 21247079 | A | 0.00715 |
| rs7752602  | 6 | 21258436 | C | 0.01308 |
| rs1459047  | 6 | 21308369 | C | 0.01436 |
| rs9366399  | 6 | 21483974 | G | 0.00052 |
| rs9466056  | 6 | 21492592 | C | 0.01066 |
| rs1740852  | 6 | 21716958 | G | 0.00165 |
| rs4712631  | 6 | 21818875 | C | 0.01042 |
| rs9368373  | 6 | 22024631 | C | 0.01227 |
| rs11751362 | 6 | 22063943 | G | 0.01412 |
| rs7766354  | 6 | 22103738 | T | 0.00645 |
| rs17263098 | 6 | 22316487 | A | 0.00498 |
| rs1205898  | 6 | 22448557 | G | 0.01473 |
| rs10485008 | 6 | 22614610 | G | 0.00562 |
| rs7741889  | 6 | 22625935 | T | 0.00591 |
| rs6927431  | 6 | 22626538 | T | 0.01630 |

|            |   |          |   |         |
|------------|---|----------|---|---------|
| rs7748467  | 6 | 22627328 | G | 0.01603 |
| rs9393306  | 6 | 22629109 | G | 0.00685 |
| rs6927934  | 6 | 22747766 | C | 0.01254 |
| rs4448082  | 6 | 22834795 | A | 0.00520 |
| rs9393333  | 6 | 22885610 | A | 0.00973 |
| rs4131446  | 6 | 23237967 | G | 0.01202 |
| rs440115   | 6 | 23548392 | C | 0.00192 |
| rs199024   | 6 | 23555091 | G | 0.00443 |
| rs191815   | 6 | 23572989 | T | 0.01310 |
| rs187936   | 6 | 23584367 | G | 0.01606 |
| rs199067   | 6 | 23591265 | T | 0.01628 |
| rs199059   | 6 | 23595836 | C | 0.01091 |
| rs2180936  | 6 | 23738028 | C | 0.00615 |
| rs7743895  | 6 | 23743977 | A | 0.00147 |
| rs7762347  | 6 | 23762820 | T | 0.01108 |
| rs12190667 | 6 | 24039481 | T | 0.00377 |
| rs7455023  | 6 | 24241681 | A | 0.01458 |
| rs2744600  | 6 | 24641411 | T | 0.00072 |
| rs393228   | 6 | 25070407 | T | 0.01071 |
| rs1739326  | 6 | 25071608 | A | 0.00877 |
| rs303899   | 6 | 25147772 | G | 0.00419 |
| rs6456652  | 6 | 25263186 | G | 0.00207 |
| rs9467448  | 6 | 25353083 | T | 0.01504 |
| rs16890640 | 6 | 25577310 | T | 0.00452 |
| rs548987   | 6 | 25977350 | C | 0.00454 |
| rs2230655  | 6 | 26141485 | G | 0.00118 |
| rs16891417 | 6 | 26319374 | T | 0.01614 |
| rs2143345  | 6 | 26337127 | C | 0.01381 |
| rs3757142  | 6 | 26488524 | A | 0.00671 |
| rs3757149  | 6 | 26489295 | T | 0.01363 |
| rs2498380  | 6 | 26751975 | C | 0.01629 |
| rs2475068  | 6 | 26935875 | A | 0.01471 |
| rs7776164  | 6 | 29066437 | T | 0.00755 |
| rs7770592  | 6 | 29503726 | A | 0.01152 |
| rs29226    | 6 | 29688990 | A | 0.00663 |
| rs3130252  | 6 | 29739723 | C | 0.00632 |
| rs1610593  | 6 | 29786499 | T | 0.00839 |
| rs1627465  | 6 | 29790880 | C | 0.00034 |
| rs9258205  | 6 | 29811802 | A | 0.00709 |
| rs16896944 | 6 | 30134125 | G | 0.01234 |
| rs9261536  | 6 | 30239328 | A | 0.00876 |
| rs9261739  | 6 | 30475514 | A | 0.01394 |
| rs2516675  | 6 | 30538499 | T | 0.00991 |
| rs3130666  | 6 | 30848139 | T | 0.01121 |

|            |   |          |   |         |
|------------|---|----------|---|---------|
| rs2240063  | 6 | 31222724 | C | 0.01241 |
| rs2106074  | 6 | 31241488 | G | 0.00185 |
| rs2596517  | 6 | 31468074 | C | 0.01487 |
| rs2523693  | 6 | 31526103 | G | 0.00178 |
| rs3115537  | 6 | 31605814 | G | 0.00956 |
| rs2071593  | 6 | 31620778 | G | 0.01554 |
| rs9268418  | 6 | 32451664 | T | 0.01029 |
| rs2070121  | 6 | 32889532 | G | 0.00521 |
| rs7763822  | 6 | 33168406 | C | 0.00293 |
| rs3117230  | 6 | 33183613 | A | 0.01210 |
| rs4713633  | 6 | 33585118 | A | 0.00143 |
| rs444697   | 6 | 33682987 | T | 0.00202 |
| rs1408711  | 6 | 33727986 | G | 0.00152 |
| rs2495965  | 6 | 34028529 | T | 0.01386 |
| rs6918981  | 6 | 34346492 | A | 0.00968 |
| rs6691     | 6 | 34360330 | T | 0.01363 |
| rs3800426  | 6 | 35117174 | G | 0.01517 |
| rs2820223  | 6 | 35117273 | G | 0.01437 |
| rs2817032  | 6 | 35796597 | G | 0.00260 |
| rs9470131  | 6 | 35919641 | G | 0.00038 |
| rs9470139  | 6 | 35929492 | G | 0.00963 |
| rs9462141  | 6 | 35943016 | G | 0.00850 |
| rs10456081 | 6 | 36033776 | C | 0.00206 |
| rs7754088  | 6 | 36062312 | C | 0.00290 |
| rs16884919 | 6 | 36179495 | A | 0.00281 |
| rs1476017  | 6 | 36418874 | C | 0.01540 |
| rs2015973  | 6 | 36422250 | A | 0.00969 |
| rs12208229 | 6 | 36458402 | G | 0.00473 |
| rs6923993  | 6 | 36535254 | A | 0.00441 |
| rs236486   | 6 | 36794385 | A | 0.00148 |
| rs236434   | 6 | 36837628 | G | 0.00934 |
| rs16889183 | 6 | 36913731 | A | 0.00194 |
| rs2293381  | 6 | 37046410 | A | 0.00753 |
| rs7751412  | 6 | 37218073 | G | 0.00519 |
| rs9462297  | 6 | 37410410 | G | 0.01602 |
| rs6942122  | 6 | 37630944 | A | 0.00552 |
| rs9369014  | 6 | 37692288 | T | 0.01454 |
| rs2842509  | 6 | 38144544 | C | 0.00639 |
| rs12660215 | 6 | 38413748 | G | 0.00323 |
| rs9357271  | 6 | 38473851 | A | 0.00693 |
| rs9394524  | 6 | 38769909 | A | 0.01115 |
| rs1018631  | 6 | 40379505 | C | 0.01579 |
| rs4714329  | 6 | 40381435 | C | 0.00380 |
| rs715831   | 6 | 40400445 | A | 0.01065 |



|            |   |          |   |         |
|------------|---|----------|---|---------|
| rs9462616  | 6 | 40464159 | T | 0.00603 |
| rs2436731  | 6 | 40534831 | A | 0.00476 |
| rs1433725  | 6 | 40538982 | T | 0.01242 |
| rs2487372  | 6 | 40587968 | G | 0.00188 |
| rs7738344  | 6 | 40632698 | A | 0.00565 |
| rs1771294  | 6 | 40695765 | A | 0.00912 |
| rs9369260  | 6 | 41118346 | C | 0.00094 |
| rs6903444  | 6 | 41122198 | C | 0.01568 |
| rs9462675  | 6 | 41261216 | A | 0.00661 |
| rs4711658  | 6 | 41270869 | C | 0.01077 |
| rs12180804 | 6 | 41398268 | G | 0.00244 |
| rs4711690  | 6 | 41816916 | C | 0.00213 |
| rs902962   | 6 | 42388855 | G | 0.00875 |
| rs260274   | 6 | 42415548 | G | 0.01414 |
| rs6905797  | 6 | 42750901 | C | 0.01643 |
| rs3730363  | 6 | 43252032 | A | 0.00859 |
| rs6458342  | 6 | 43647118 | G | 0.00771 |
| rs833622   | 6 | 44008382 | C | 0.01275 |
| rs16897100 | 6 | 44044639 | G | 0.00670 |
| rs11755164 | 6 | 44747162 | G | 0.01067 |
| rs3799986  | 6 | 45008231 | C | 0.01228 |
| rs1329716  | 6 | 45061736 | T | 0.00599 |
| rs9369527  | 6 | 45066350 | C | 0.01296 |
| rs1852986  | 6 | 45437467 | G | 0.01505 |
| rs17209874 | 6 | 45489562 | T | 0.00876 |
| rs6930053  | 6 | 45596736 | G | 0.00511 |
| rs3777583  | 6 | 46022068 | T | 0.01213 |
| rs1010893  | 6 | 46038854 | G | 0.01610 |
| rs3777618  | 6 | 46077981 | C | 0.00240 |
| rs3777622  | 6 | 46083313 | C | 0.01437 |
| rs9357499  | 6 | 46165268 | A | 0.00695 |
| rs2584076  | 6 | 46311588 | T | 0.00554 |
| rs7766177  | 6 | 46371124 | A | 0.00720 |
| rs16874575 | 6 | 46391881 | T | 0.01638 |
| rs630033   | 6 | 46939731 | G | 0.00620 |
| rs628638   | 6 | 46940057 | G | 0.00307 |
| rs220702   | 6 | 46975676 | C | 0.00875 |
| rs2077055  | 6 | 47018374 | T | 0.01491 |
| rs4714964  | 6 | 47028949 | G | 0.00199 |
| rs1413933  | 6 | 47047792 | T | 0.00528 |
| rs2396821  | 6 | 47183758 | G | 0.00396 |
| rs9369662  | 6 | 47258931 | G | 0.00855 |
| rs9349407  | 6 | 47561337 | G | 0.01418 |
| rs10948378 | 6 | 47802961 | C | 0.01439 |

|            |   |          |   |         |
|------------|---|----------|---|---------|
| rs16876415 | 6 | 47803071 | C | 0.01282 |
| rs10807383 | 6 | 47990767 | T | 0.00434 |
| rs1325706  | 6 | 48085287 | C | 0.01372 |
| rs1334842  | 6 | 48428679 | A | 0.00599 |
| rs1530831  | 6 | 48484290 | G | 0.01271 |
| rs12204466 | 6 | 48544543 | A | 0.00255 |
| rs11758627 | 6 | 49125461 | T | 0.01019 |
| rs7756016  | 6 | 49574750 | T | 0.00344 |
| rs9349509  | 6 | 50037888 | A | 0.00630 |
| rs17665069 | 6 | 50372090 | A | 0.00639 |
| rs2206272  | 6 | 50873311 | T | 0.00401 |
| rs9473953  | 6 | 51033290 | A | 0.00714 |
| rs4435937  | 6 | 51426093 | C | 0.01457 |
| rs4339454  | 6 | 51474621 | A | 0.01295 |
| rs4506044  | 6 | 51482934 | T | 0.01422 |
| rs10948617 | 6 | 51491555 | C | 0.01618 |
| rs10948618 | 6 | 51491628 | G | 0.01634 |
| rs4644046  | 6 | 51492968 | C | 0.01652 |
| rs10948623 | 6 | 51526189 | T | 0.01558 |
| rs12214769 | 6 | 51543535 | C | 0.00524 |
| rs10948634 | 6 | 51556765 | A | 0.01661 |
| rs6930919  | 6 | 51576003 | T | 0.00890 |
| rs1108202  | 6 | 51577180 | A | 0.01599 |
| rs2784217  | 6 | 51607178 | G | 0.01038 |
| rs624699   | 6 | 51622567 | A | 0.01606 |
| rs1474991  | 6 | 51835900 | C | 0.00137 |
| rs10484879 | 6 | 52159916 | A | 0.00197 |
| rs6917841  | 6 | 52482782 | C | 0.01147 |
| rs2179803  | 6 | 52516853 | T | 0.01075 |
| rs6913533  | 6 | 53127129 | C | 0.00583 |
| rs6920669  | 6 | 53128723 | C | 0.01209 |
| rs1346603  | 6 | 53257221 | C | 0.01642 |
| rs16884542 | 6 | 53957408 | A | 0.00082 |
| rs1321884  | 6 | 54111303 | A | 0.00482 |
| rs6913087  | 6 | 54245008 | A | 0.01190 |
| rs12661397 | 6 | 54349874 | T | 0.00150 |
| rs9475023  | 6 | 54795938 | C | 0.00557 |
| rs4626423  | 6 | 55479622 | C | 0.00596 |
| rs9475342  | 6 | 55503779 | C | 0.00523 |
| rs4398739  | 6 | 55536739 | C | 0.00855 |
| rs6459114  | 6 | 55891681 | T | 0.01580 |
| rs6926110  | 6 | 55902102 | G | 0.00360 |
| rs9464315  | 6 | 55975223 | A | 0.01599 |
| rs3996940  | 6 | 56126544 | C | 0.01055 |

|            |   |          |   |         |
|------------|---|----------|---|---------|
| rs12525967 | 6 | 56234901 | A | 0.00790 |
| rs2397214  | 6 | 56254519 | G | 0.00051 |
| rs6929091  | 6 | 56553994 | A | 0.00094 |
| rs6928715  | 6 | 57159524 | G | 0.00798 |
| rs1755833  | 6 | 57294253 | T | 0.00472 |
| rs1336308  | 6 | 62067505 | A | 0.01499 |
| rs16885317 | 6 | 63224267 | T | 0.01499 |
| rs9360515  | 6 | 63283361 | A | 0.00046 |
| rs2459572  | 6 | 64051334 | C | 0.00273 |
| rs4076418  | 6 | 64915250 | C | 0.00148 |
| rs9453277  | 6 | 66129666 | C | 0.00443 |
| rs12205154 | 6 | 66132201 | T | 0.00923 |
| rs6455065  | 6 | 66758480 | A | 0.01412 |
| rs12202805 | 6 | 66760624 | A | 0.01413 |
| rs17527218 | 6 | 66820787 | A | 0.00022 |
| rs3846808  | 6 | 66875325 | A | 0.00409 |
| rs9354391  | 6 | 66946904 | T | 0.00389 |
| rs17644076 | 6 | 67061694 | A | 0.01154 |
| rs4631256  | 6 | 67246679 | T | 0.00152 |
| rs12662737 | 6 | 67331421 | G | 0.00716 |
| rs4710324  | 6 | 67408933 | T | 0.00526 |
| rs4493734  | 6 | 67459352 | A | 0.00491 |
| rs9360234  | 6 | 67577822 | T | 0.00888 |
| rs9351600  | 6 | 67586556 | A | 0.00676 |
| rs9360251  | 6 | 67702785 | G | 0.00241 |
| rs9345935  | 6 | 67721287 | G | 0.00438 |
| rs6933579  | 6 | 67728137 | C | 0.01425 |
| rs4292508  | 6 | 67738143 | A | 0.00165 |
| rs2502279  | 6 | 67822412 | T | 0.00554 |
| rs2747156  | 6 | 68371284 | T | 0.01244 |
| rs2818113  | 6 | 68398350 | A | 0.01392 |
| rs2179964  | 6 | 68414245 | G | 0.01647 |
| rs9342657  | 6 | 68421587 | C | 0.00322 |
| rs2816902  | 6 | 68428695 | C | 0.00876 |
| rs2818105  | 6 | 68428791 | G | 0.01655 |
| rs17546195 | 6 | 68444789 | C | 0.01652 |
| rs2493374  | 6 | 68454951 | G | 0.00969 |
| rs9454233  | 6 | 68459204 | T | 0.00855 |
| rs9454286  | 6 | 68562671 | G | 0.00191 |
| rs12203654 | 6 | 68563436 | C | 0.00900 |
| rs6913371  | 6 | 68565666 | G | 0.00773 |
| rs1913477  | 6 | 68583232 | A | 0.01215 |
| rs1913478  | 6 | 68583437 | C | 0.00924 |
| rs7753361  | 6 | 68857216 | A | 0.00531 |

|            |   |          |   |         |
|------------|---|----------|---|---------|
| rs1388056  | 6 | 69233497 | A | 0.00292 |
| rs10455670 | 6 | 69347352 | T | 0.01526 |
| rs13218370 | 6 | 69349961 | T | 0.01589 |
| rs577328   | 6 | 69598052 | G | 0.00226 |
| rs6455313  | 6 | 70195288 | T | 0.01450 |
| rs2487399  | 6 | 70594155 | T | 0.01630 |
| rs2487411  | 6 | 70605345 | T | 0.01467 |
| rs2487412  | 6 | 70605431 | T | 0.00689 |
| rs9342783  | 6 | 70909214 | A | 0.00525 |
| rs3806051  | 6 | 70943464 | A | 0.01425 |
| rs9354910  | 6 | 71025381 | G | 0.00218 |
| rs12198920 | 6 | 71364068 | A | 0.00775 |
| rs12204236 | 6 | 72298055 | A | 0.01611 |
| rs12525003 | 6 | 72304069 | T | 0.01087 |
| rs1339226  | 6 | 73113269 | A | 0.00126 |
| rs1317538  | 6 | 73706132 | C | 0.01605 |
| rs12199142 | 6 | 74335856 | G | 0.01231 |
| rs527606   | 6 | 74402893 | A | 0.00025 |
| rs9293938  | 6 | 74481076 | A | 0.01155 |
| rs2882694  | 6 | 74574401 | G | 0.00750 |
| rs10498896 | 6 | 74645033 | C | 0.00189 |
| rs41475845 | 6 | 74647350 | G | 0.00569 |
| rs10805983 | 6 | 74663429 | G | 0.01580 |
| rs12194928 | 6 | 74665814 | G | 0.01245 |
| rs1898483  | 6 | 74667157 | G | 0.01447 |
| rs12194422 | 6 | 74731052 | G | 0.01100 |
| rs9343135  | 6 | 75088407 | A | 0.00136 |
| rs6902731  | 6 | 75274664 | A | 0.01394 |
| rs2181246  | 6 | 76600038 | A | 0.00136 |
| rs6903025  | 6 | 76955639 | C | 0.00803 |
| rs10943324 | 6 | 77034073 | A | 0.00286 |
| rs1457936  | 6 | 77422822 | G | 0.00959 |
| rs16888579 | 6 | 77860206 | C | 0.00069 |
| rs9343603  | 6 | 78098265 | G | 0.01403 |
| rs1458429  | 6 | 78283839 | T | 0.01600 |
| rs1458424  | 6 | 78373630 | G | 0.00763 |
| rs3846758  | 6 | 78459796 | T | 0.01564 |
| rs7764370  | 6 | 78642548 | A | 0.01587 |
| rs580694   | 6 | 79456568 | C | 0.00048 |
| rs1354832  | 6 | 79670482 | G | 0.00798 |
| rs3846733  | 6 | 80143211 | G | 0.00711 |
| rs9343912  | 6 | 80203374 | A | 0.01189 |
| rs2812683  | 6 | 80380553 | A | 0.00061 |
| rs2655697  | 6 | 80382049 | G | 0.01346 |

|            |   |          |   |         |
|------------|---|----------|---|---------|
| rs2322633  | 6 | 80902708 | T | 0.00552 |
| rs3805901  | 6 | 81034459 | T | 0.01143 |
| rs660888   | 6 | 81039931 | A | 0.00169 |
| rs9449206  | 6 | 81753270 | T | 0.01010 |
| rs1855586  | 6 | 81983371 | C | 0.01624 |
| rs7744820  | 6 | 81994601 | T | 0.00441 |
| rs9361775  | 6 | 82004634 | G | 0.00749 |
| rs16893194 | 6 | 82304961 | G | 0.01233 |
| rs1935003  | 6 | 82325403 | T | 0.00261 |
| rs1361684  | 6 | 82729246 | A | 0.01296 |
| rs4546539  | 6 | 83284979 | G | 0.01651 |
| rs11756746 | 6 | 84343196 | G | 0.00376 |
| rs3757007  | 6 | 84356081 | T | 0.01377 |
| rs13212099 | 6 | 84356900 | G | 0.01195 |
| rs772909   | 6 | 84536430 | T | 0.01316 |
| rs9341974  | 6 | 85129893 | A | 0.01539 |
| rs7761054  | 6 | 85130696 | C | 0.00429 |
| rs7760461  | 6 | 85140975 | C | 0.00367 |
| rs9444171  | 6 | 85172697 | T | 0.01090 |
| rs215936   | 6 | 85547923 | G | 0.01360 |
| rs215921   | 6 | 85573317 | A | 0.00037 |
| rs1407645  | 6 | 85689704 | T | 0.00564 |
| rs1923587  | 6 | 85821656 | T | 0.01418 |
| rs1325975  | 6 | 85875339 | C | 0.01115 |
| rs2484355  | 6 | 86451122 | T | 0.00607 |
| rs6454487  | 6 | 86503587 | A | 0.01141 |
| rs9450333  | 6 | 86576474 | G | 0.00826 |
| rs6933377  | 6 | 86761974 | C | 0.01101 |
| rs6940217  | 6 | 86955183 | G | 0.00427 |
| rs7760257  | 6 | 86970480 | C | 0.00506 |
| rs7758230  | 6 | 87040157 | A | 0.00512 |
| rs1983841  | 6 | 87856604 | T | 0.00727 |
| rs242291   | 6 | 88133802 | A | 0.00133 |
| rs4383780  | 6 | 88637308 | C | 0.01649 |
| rs1940893  | 6 | 88716726 | A | 0.00063 |
| rs9362482  | 6 | 89093239 | G | 0.00467 |
| rs12207463 | 6 | 89264237 | T | 0.00354 |
| rs205217   | 6 | 89805824 | A | 0.00180 |
| rs205216   | 6 | 89805908 | T | 0.00708 |
| rs1980986  | 6 | 89818726 | T | 0.01361 |
| rs2304895  | 6 | 90687853 | T | 0.01055 |
| rs9353711  | 6 | 90759159 | G | 0.00800 |
| rs1353227  | 6 | 91233622 | G | 0.00964 |
| rs10944489 | 6 | 91320814 | A | 0.00297 |

|            |   |           |   |         |
|------------|---|-----------|---|---------|
| rs282427   | 6 | 91367576  | A | 0.00633 |
| rs1504292  | 6 | 91694410  | G | 0.00859 |
| rs17535234 | 6 | 91780559  | T | 0.01287 |
| rs4707664  | 6 | 92020480  | C | 0.00606 |
| rs12211588 | 6 | 92394128  | C | 0.01022 |
| rs598218   | 6 | 92451486  | A | 0.00613 |
| rs2501650  | 6 | 92589899  | T | 0.00519 |
| rs2454268  | 6 | 92617314  | G | 0.00984 |
| rs16884981 | 6 | 92622135  | A | 0.00461 |
| rs594175   | 6 | 93738564  | T | 0.00857 |
| rs16871170 | 6 | 94097830  | G | 0.00819 |
| rs9354041  | 6 | 94544526  | G | 0.00907 |
| rs9354042  | 6 | 94544579  | A | 0.01653 |
| rs9351380  | 6 | 94544635  | T | 0.01526 |
| rs9363117  | 6 | 94586660  | A | 0.01122 |
| rs6941459  | 6 | 94593345  | T | 0.00605 |
| rs1937357  | 6 | 94676185  | T | 0.01375 |
| rs1219033  | 6 | 94690716  | T | 0.01399 |
| rs4463230  | 6 | 94741047  | C | 0.01072 |
| rs401519   | 6 | 94980747  | G | 0.00929 |
| rs220970   | 6 | 95037294  | C | 0.00524 |
| rs397178   | 6 | 95050803  | A | 0.00489 |
| rs7753594  | 6 | 95081989  | A | 0.01510 |
| rs9400893  | 6 | 96144620  | A | 0.00342 |
| rs9489578  | 6 | 96171771  | C | 0.01198 |
| rs9386310  | 6 | 96636840  | T | 0.00122 |
| rs4133133  | 6 | 96742188  | T | 0.01593 |
| rs9374023  | 6 | 97200016  | C | 0.01111 |
| rs11153105 | 6 | 97207722  | G | 0.01351 |
| rs12663742 | 6 | 97899456  | T | 0.01456 |
| rs200808   | 6 | 98011949  | T | 0.01603 |
| rs1933721  | 6 | 98419944  | G | 0.01328 |
| rs9387768  | 6 | 98423600  | T | 0.00338 |
| rs6927923  | 6 | 98666847  | A | 0.00335 |
| rs158773   | 6 | 99056271  | C | 0.01349 |
| rs2219958  | 6 | 99165730  | T | 0.00692 |
| rs4839969  | 6 | 99242193  | G | 0.01373 |
| rs4131463  | 6 | 99364552  | G | 0.01091 |
| rs2604065  | 6 | 99408232  | T | 0.01312 |
| rs9968876  | 6 | 100194003 | C | 0.00670 |
| rs705593   | 6 | 101401010 | T | 0.01251 |
| rs2209936  | 6 | 101683037 | T | 0.00873 |
| rs4840195  | 6 | 102359490 | G | 0.00666 |
| rs9377315  | 6 | 102409621 | C | 0.01142 |

|            |   |           |   |         |
|------------|---|-----------|---|---------|
| rs6905533  | 6 | 102439699 | T | 0.00451 |
| rs946860   | 6 | 102526006 | T | 0.00389 |
| rs13195038 | 6 | 102570833 | G | 0.00003 |
| rs13191478 | 6 | 102577470 | A | 0.00338 |
| rs6571078  | 6 | 103604602 | A | 0.01182 |
| rs9373682  | 6 | 103694496 | A | 0.00869 |
| rs41419145 | 6 | 103700073 | G | 0.01250 |
| rs10782355 | 6 | 103895546 | T | 0.00746 |
| rs17064013 | 6 | 103946380 | G | 0.01268 |
| rs9391057  | 6 | 104118930 | A | 0.00763 |
| rs4518532  | 6 | 104277456 | A | 0.01314 |
| rs9499840  | 6 | 104869866 | A | 0.01553 |
| rs9399892  | 6 | 105161737 | T | 0.00692 |
| rs9499921  | 6 | 105243945 | C | 0.00935 |
| rs6928554  | 6 | 105439613 | C | 0.00582 |
| rs17065778 | 6 | 105856960 | G | 0.00450 |
| rs716490   | 6 | 105924171 | G | 0.00831 |
| rs6938669  | 6 | 106506341 | T | 0.00182 |
| rs6937414  | 6 | 106576584 | T | 0.00492 |
| rs17558797 | 6 | 106639239 | G | 0.00833 |
| rs6920944  | 6 | 106744268 | A | 0.01563 |
| rs1769981  | 6 | 106808927 | A | 0.00072 |
| rs2297971  | 6 | 107110137 | G | 0.01180 |
| rs4523123  | 6 | 107132119 | T | 0.00996 |
| rs1739759  | 6 | 107409502 | A | 0.01644 |
| rs9398133  | 6 | 107972837 | G | 0.00020 |
| rs846962   | 6 | 108075191 | C | 0.01396 |
| rs4945782  | 6 | 108089658 | A | 0.01282 |
| rs4945783  | 6 | 108106634 | A | 0.00338 |
| rs4945784  | 6 | 108106656 | A | 0.00701 |
| rs217537   | 6 | 108618709 | C | 0.01545 |
| rs2253310  | 6 | 108995286 | C | 0.01492 |
| rs2490272  | 6 | 109002079 | A | 0.01412 |
| rs1268165  | 6 | 109115071 | A | 0.00705 |
| rs541020   | 6 | 109190725 | G | 0.00235 |
| rs497961   | 6 | 109192329 | C | 0.00825 |
| rs7772602  | 6 | 109715354 | G | 0.00748 |
| rs1111866  | 6 | 109717539 | C | 0.01382 |
| rs1111865  | 6 | 109717556 | G | 0.01534 |
| rs4601178  | 6 | 109717939 | C | 0.01458 |
| rs1028244  | 6 | 109748980 | A | 0.00177 |
| rs2024850  | 6 | 109925149 | T | 0.01331 |
| rs749517   | 6 | 109959609 | G | 0.01539 |
| rs829816   | 6 | 110103836 | T | 0.00582 |

|            |   |           |   |         |
|------------|---|-----------|---|---------|
| rs739516   | 6 | 110971876 | C | 0.00054 |
| rs2691171  | 6 | 111084663 | G | 0.00651 |
| rs471043   | 6 | 112407171 | T | 0.00775 |
| rs1828520  | 6 | 113023720 | C | 0.00849 |
| rs2346531  | 6 | 113053163 | A | 0.01640 |
| rs17074196 | 6 | 113064010 | A | 0.01308 |
| rs4945480  | 6 | 113227546 | G | 0.00002 |
| rs7763553  | 6 | 113571263 | A | 0.00698 |
| rs9387120  | 6 | 113611708 | G | 0.00792 |
| rs774414   | 6 | 113696384 | T | 0.01279 |
| rs2049924  | 6 | 113858994 | A | 0.01433 |
| rs17075386 | 6 | 114131902 | C | 0.00479 |
| rs9320480  | 6 | 114570167 | G | 0.00007 |
| rs786141   | 6 | 114980551 | A | 0.00014 |
| rs786147   | 6 | 115006803 | G | 0.01103 |
| rs9481463  | 6 | 115073292 | G | 0.00389 |
| rs1568536  | 6 | 115129127 | T | 0.01431 |
| rs1431817  | 6 | 115524039 | A | 0.00080 |
| rs6940934  | 6 | 115746754 | A | 0.01289 |
| rs6918482  | 6 | 115760753 | T | 0.00557 |
| rs12662638 | 6 | 115764504 | T | 0.00319 |
| rs195468   | 6 | 116320936 | T | 0.00559 |
| rs7775839  | 6 | 116927839 | C | 0.00607 |
| rs647689   | 6 | 117187923 | A | 0.00558 |
| rs12208470 | 6 | 117679296 | G | 0.01396 |
| rs2778     | 6 | 117716222 | C | 0.00130 |
| rs11153658 | 6 | 117830157 | T | 0.00934 |
| rs11510517 | 6 | 117957911 | G | 0.00533 |
| rs2134088  | 6 | 117970381 | A | 0.01137 |
| rs12664806 | 6 | 118170752 | C | 0.00168 |
| rs1338980  | 6 | 118325563 | A | 0.01445 |
| rs1416413  | 6 | 118392873 | C | 0.00799 |
| rs743928   | 6 | 118588504 | G | 0.00781 |
| rs17336166 | 6 | 118611443 | A | 0.00862 |
| rs9489407  | 6 | 118899030 | A | 0.00087 |
| rs902779   | 6 | 119107286 | A | 0.01498 |
| rs794854   | 6 | 119139019 | C | 0.01235 |
| rs9372511  | 6 | 119139756 | A | 0.00820 |
| rs11751221 | 6 | 119178364 | T | 0.00306 |
| rs10485389 | 6 | 119195037 | T | 0.00949 |
| rs4946403  | 6 | 119554684 | A | 0.00445 |
| rs4945637  | 6 | 119789644 | A | 0.00340 |
| rs9285434  | 6 | 120062213 | T | 0.00770 |
| rs10872186 | 6 | 120129329 | A | 0.01182 |



|            |   |           |   |         |
|------------|---|-----------|---|---------|
| rs4945648  | 6 | 120135566 | T | 0.01234 |
| rs1028961  | 6 | 120271168 | G | 0.01199 |
| rs7751474  | 6 | 120426953 | T | 0.00059 |
| rs261771   | 6 | 120560384 | C | 0.00255 |
| rs4946518  | 6 | 121216502 | C | 0.01510 |
| rs1273725  | 6 | 121487048 | T | 0.01247 |
| rs1273745  | 6 | 121506710 | G | 0.00909 |
| rs699412   | 6 | 122646418 | T | 0.01149 |
| rs9375134  | 6 | 122779358 | T | 0.00696 |
| rs3778348  | 6 | 122779968 | A | 0.00032 |
| rs9490567  | 6 | 123231090 | G | 0.00421 |
| rs9490568  | 6 | 123231169 | T | 0.00824 |
| rs1890467  | 6 | 123681714 | G | 0.00585 |
| rs9490885  | 6 | 124072450 | T | 0.01196 |
| rs6569367  | 6 | 124207957 | C | 0.00882 |
| rs6907236  | 6 | 124288046 | A | 0.01609 |
| rs163286   | 6 | 124503145 | A | 0.01594 |
| rs9491202  | 6 | 124976157 | G | 0.00298 |
| rs868549   | 6 | 125068862 | A | 0.01237 |
| rs2875776  | 6 | 125081311 | G | 0.00996 |
| rs1415762  | 6 | 125081641 | A | 0.01036 |
| rs9375382  | 6 | 125360914 | C | 0.00741 |
| rs41523048 | 6 | 125386212 | C | 0.00182 |
| rs11154383 | 6 | 127467150 | A | 0.01242 |
| rs2800708  | 6 | 127479310 | G | 0.00472 |
| rs9482771  | 6 | 127488303 | C | 0.01626 |
| rs7759507  | 6 | 127588720 | T | 0.00276 |
| rs17460940 | 6 | 128854778 | T | 0.00480 |
| rs17461290 | 6 | 128870929 | A | 0.00335 |
| rs1508453  | 6 | 129171964 | C | 0.01327 |
| rs7738996  | 6 | 129430224 | T | 0.00136 |
| rs6569580  | 6 | 129430959 | G | 0.00885 |
| rs4327720  | 6 | 129444415 | A | 0.01628 |
| rs6569625  | 6 | 130099903 | A | 0.00475 |
| rs9321220  | 6 | 130667329 | A | 0.01044 |
| rs9492764  | 6 | 131308759 | C | 0.00796 |
| rs1332492  | 6 | 131392971 | G | 0.01152 |
| rs17182683 | 6 | 131503269 | A | 0.00479 |
| rs2608935  | 6 | 131831429 | T | 0.01628 |
| rs9285474  | 6 | 133915179 | A | 0.00371 |
| rs7452066  | 6 | 133983767 | C | 0.01532 |
| rs6907934  | 6 | 134003067 | A | 0.01034 |
| rs9321410  | 6 | 134039826 | A | 0.00995 |
| rs7772416  | 6 | 134800173 | A | 0.01427 |

|            |   |           |   |          |
|------------|---|-----------|---|----------|
| rs1040637  | 6 | 134865612 | C | 0.00000  |
| rs9389215  | 6 | 135101251 | G | 0.00490  |
| rs9389225  | 6 | 135113491 | C | 0.00774  |
| rs6902872  | 6 | 135128716 | C | 0.00315  |
| rs11964449 | 6 | 135811382 | G | 0.01255  |
| rs9376148  | 6 | 136140193 | C | 0.01626  |
| rs9494397  | 6 | 136209261 | A | 0.01272  |
| rs7739002  | 6 | 137120748 | A | 0.00231  |
| rs6570112  | 6 | 137291664 | C | 0.00050  |
| rs7745532  | 6 | 137298020 | T | 0.00767  |
| rs6935663  | 6 | 137761360 | A | 0.00614  |
| rs9484058  | 6 | 137888129 | T | 14.48500 |
| rs203694   | 6 | 137906100 | G | 0.00548  |
| rs595985   | 6 | 137968020 | G | 0.01161  |
| rs12210705 | 6 | 137994858 | T | 0.01187  |
| rs540414   | 6 | 138021291 | C | 0.00841  |
| rs583021   | 6 | 138048780 | G | 0.00346  |
| rs946227   | 6 | 138124455 | C | 0.01521  |
| rs7768443  | 6 | 138301757 | A | 0.00545  |
| rs10872495 | 6 | 139197370 | G | 0.01053  |
| rs721795   | 6 | 139260807 | A | 0.01436  |
| rs9495324  | 6 | 139406923 | A | 0.00231  |
| rs17068451 | 6 | 139618429 | A | 0.01030  |
| rs757631   | 6 | 139785963 | G | 0.01399  |
| rs13209699 | 6 | 139906652 | T | 0.00622  |
| rs2057033  | 6 | 139939620 | G | 0.01193  |
| rs17754253 | 6 | 140185502 | T | 0.00300  |
| rs7755382  | 6 | 140215163 | T | 0.00307  |
| rs624260   | 6 | 140276853 | G | 0.00180  |
| rs591822   | 6 | 140279510 | G | 0.00132  |
| rs17069893 | 6 | 140620187 | G | 0.00527  |
| rs988434   | 6 | 141128904 | G | 0.00391  |
| rs686347   | 6 | 141172474 | A | 0.01278  |
| rs677319   | 6 | 141217062 | G | 0.00232  |
| rs11155177 | 6 | 141763600 | C | 0.01177  |
| rs9496093  | 6 | 141960747 | T | 0.00081  |
| rs9496231  | 6 | 142391691 | A | 0.00281  |
| rs1040525  | 6 | 142745362 | T | 0.00796  |
| rs200153   | 6 | 143479138 | G | 0.00962  |
| rs6908441  | 6 | 143522436 | T | 0.00726  |
| rs9376756  | 6 | 143927818 | T | 0.00608  |
| rs9321927  | 6 | 143954988 | G | 0.00794  |
| rs17072918 | 6 | 144061598 | T | 0.00030  |
| rs1015341  | 6 | 144077157 | A | 0.00798  |

|            |   |           |   |         |
|------------|---|-----------|---|---------|
| rs7762250  | 6 | 144516757 | G | 0.01084 |
| rs4895642  | 6 | 144800492 | A | 0.00140 |
| rs10499231 | 6 | 144903639 | T | 0.00093 |
| rs1918744  | 6 | 144960512 | T | 0.00690 |
| rs9403569  | 6 | 144970410 | C | 0.00760 |
| rs6917204  | 6 | 145326409 | G | 0.01323 |
| rs4896765  | 6 | 145331021 | G | 0.01555 |
| rs7757259  | 6 | 145594845 | C | 0.00448 |
| rs1546866  | 6 | 145599134 | G | 0.01485 |
| rs551096   | 6 | 145648801 | G | 0.00288 |
| rs9373448  | 6 | 145649688 | A | 0.00798 |
| rs362949   | 6 | 146694047 | C | 0.00633 |
| rs9322090  | 6 | 147450332 | C | 0.00337 |
| rs452577   | 6 | 147858688 | A | 0.00151 |
| rs12192149 | 6 | 148128121 | G | 0.01419 |
| rs1881825  | 6 | 148417762 | T | 0.00584 |
| rs7764264  | 6 | 148451024 | T | 0.00703 |
| rs2493926  | 6 | 148655960 | C | 0.00351 |
| rs9403983  | 6 | 149096970 | A | 0.01381 |
| rs17718177 | 6 | 149130447 | C | 0.01026 |
| rs6570915  | 6 | 149320200 | G | 0.00252 |
| rs5024811  | 6 | 150287727 | A | 0.00817 |
| rs4242282  | 6 | 150315039 | G | 0.00025 |
| rs9383690  | 6 | 150502499 | C | 0.00276 |
| rs670914   | 6 | 150724036 | C | 0.00275 |
| rs9384557  | 6 | 150899065 | G | 0.00052 |
| rs1494310  | 6 | 151162803 | G | 0.00885 |
| rs7746473  | 6 | 151759227 | C | 0.00707 |
| rs3800270  | 6 | 151785755 | G | 0.01241 |
| rs1709182  | 6 | 152217050 | T | 0.01625 |
| rs9340955  | 6 | 152371894 | C | 0.01145 |
| rs750686   | 6 | 152449819 | T | 0.00622 |
| rs6940845  | 6 | 152609138 | A | 0.00899 |
| rs7776230  | 6 | 152685563 | G | 0.00770 |
| rs1873176  | 6 | 152732252 | A | 0.01193 |
| rs7747960  | 6 | 152833167 | A | 0.00061 |
| rs583501   | 6 | 153237927 | G | 0.01411 |
| rs656610   | 6 | 153259954 | T | 0.01187 |
| rs633399   | 6 | 153261967 | T | 0.01544 |
| rs672170   | 6 | 153386878 | A | 0.01637 |
| rs12529269 | 6 | 153585523 | C | 0.01496 |
| rs10485060 | 6 | 154557793 | C | 0.01213 |
| rs17214592 | 6 | 154612099 | A | 0.00768 |
| rs946236   | 6 | 154845575 | T | 0.00718 |

|            |   |           |   |         |
|------------|---|-----------|---|---------|
| rs9397210  | 6 | 155297981 | T | 0.00058 |
| rs9371355  | 6 | 155300670 | C | 0.01035 |
| rs9322500  | 6 | 155486416 | T | 0.01498 |
| rs4870382  | 6 | 156030258 | A | 0.01194 |
| rs6900173  | 6 | 156560217 | C | 0.01241 |
| rs9371421  | 6 | 156722024 | G | 0.00781 |
| rs1246188  | 6 | 157012153 | G | 0.00159 |
| rs17087747 | 6 | 157086503 | T | 0.00973 |
| rs6903671  | 6 | 157257433 | T | 0.00079 |
| rs16900494 | 6 | 158231773 | G | 0.00898 |
| rs6933878  | 6 | 158491694 | C | 0.01636 |
| rs6455577  | 6 | 158670674 | C | 0.00437 |
| rs744893   | 6 | 159122228 | C | 0.00243 |
| rs6455617  | 6 | 159451758 | C | 0.00537 |
| rs294922   | 6 | 159541322 | C | 0.00524 |
| rs400477   | 6 | 159555931 | C | 0.00448 |
| rs427072   | 6 | 159561726 | A | 0.00949 |
| rs2932987  | 6 | 159575663 | G | 0.00586 |
| rs9295125  | 6 | 160498261 | C | 0.01180 |
| rs2457576  | 6 | 160785609 | G | 0.00062 |
| rs1569933  | 6 | 160991202 | A | 0.00292 |
| rs16892196 | 6 | 161478088 | G | 0.00325 |
| rs9365261  | 6 | 161627277 | G | 0.00966 |
| rs16892547 | 6 | 161806027 | G | 0.00515 |
| rs2281403  | 6 | 161991625 | A | 0.00584 |
| rs7763253  | 6 | 161993412 | T | 0.01429 |
| rs11962721 | 6 | 162056149 | T | 0.01420 |
| rs3016563  | 6 | 162112846 | T | 0.00674 |
| rs3016551  | 6 | 162141710 | C | 0.00665 |
| rs1790014  | 6 | 162294878 | T | 0.01213 |
| rs6455807  | 6 | 162656326 | T | 0.01277 |
| rs7740928  | 6 | 162656490 | G | 0.01615 |
| rs6930880  | 6 | 162666349 | A | 0.00237 |
| rs10945825 | 6 | 162728999 | G | 0.01192 |
| rs2849527  | 6 | 163037922 | T | 0.01479 |
| rs9365480  | 6 | 163040991 | A | 0.00625 |
| rs1877771  | 6 | 163238470 | T | 0.01382 |
| rs1122118  | 6 | 164586141 | A | 0.00458 |
| rs9918342  | 6 | 164909859 | C | 0.00839 |
| rs551950   | 6 | 165508597 | G | 0.00188 |
| rs566759   | 6 | 165835911 | C | 0.01351 |
| rs1575145  | 6 | 166646556 | A | 0.01059 |
| rs763186   | 6 | 166875955 | G | 0.00529 |
| rs16899278 | 6 | 166976063 | C | 0.00210 |

|            |   |           |   |          |
|------------|---|-----------|---|----------|
| rs2881194  | 6 | 167187909 | G | 0.00288  |
| rs2282859  | 6 | 167365129 | T | 0.00606  |
| rs16899825 | 6 | 167371516 | A | 0.00953  |
| rs4710183  | 6 | 167434073 | A | 0.01078  |
| rs975822   | 6 | 167436448 | C | 0.00148  |
| rs6907666  | 6 | 167443385 | A | 0.00563  |
| rs2021033  | 6 | 167444229 | C | 5.74600  |
| rs6456158  | 6 | 167448022 | C | 0.01538  |
| rs4072270  | 6 | 167748225 | G | 0.00556  |
| rs492110   | 6 | 167854473 | C | 0.00113  |
| rs9346631  | 6 | 168073683 | A | 0.00944  |
| rs1551989  | 6 | 168456996 | A | 0.00436  |
| rs11755956 | 6 | 168529331 | G | 0.01524  |
| rs2749258  | 6 | 168654226 | A | 0.01348  |
| rs4708575  | 6 | 169147997 | A | 0.00908  |
| rs12175557 | 6 | 169234624 | A | 0.01492  |
| rs6908401  | 6 | 169306641 | A | 0.00227  |
| rs12661910 | 6 | 169326313 | G | 0.01007  |
| rs2075978  | 6 | 169554513 | A | 0.00772  |
| rs4469299  | 6 | 169559926 | G | 0.00186  |
| rs9383492  | 6 | 169677487 | A | 0.00229  |
| rs16888111 | 6 | 169677751 | T | 0.01519  |
| rs760950   | 6 | 169694673 | G | 0.00039  |
| rs6456189  | 6 | 170396431 | T | 0.01439  |
| rs1022615  | 6 | 170525166 | G | 0.01579  |
| rs9460139  | 6 | 170554104 | A | 0.00569  |
| rs4244215  | 7 | 215541    | T | 0.00753  |
| rs7785538  | 7 | 828052    | G | 0.01406  |
| rs11766365 | 7 | 829331    | G | 0.00692  |
| rs6973278  | 7 | 832995    | C | 0.00041  |
| rs7785252  | 7 | 868920    | C | 0.01613  |
| rs1639915  | 7 | 2224610   | G | 0.00013  |
| rs2969070  | 7 | 2479071   | C | 0.00884  |
| rs2527684  | 7 | 2792448   | G | 0.01313  |
| rs2644295  | 7 | 2826743   | A | 0.00481  |
| rs6958161  | 7 | 3121336   | G | 0.00858  |
| rs10951052 | 7 | 3121827   | A | 0.01454  |
| rs4722438  | 7 | 3122339   | G | 11.67100 |
| rs6956298  | 7 | 3158180   | G | 0.01287  |
| rs2049477  | 7 | 3279396   | G | 0.00392  |
| rs41363846 | 7 | 3412717   | G | 0.00917  |
| rs17741019 | 7 | 3423822   | C | 0.00026  |
| rs2178628  | 7 | 3580193   | A | 0.01201  |
| rs13236719 | 7 | 3841536   | A | 0.01233  |

|            |   |          |   |         |
|------------|---|----------|---|---------|
| rs6462411  | 7 | 3882090  | G | 0.01259 |
| rs1025915  | 7 | 4000087  | G | 0.00690 |
| rs2189973  | 7 | 4299801  | A | 0.00490 |
| rs1447397  | 7 | 4509826  | G | 0.01367 |
| rs10951714 | 7 | 4913403  | T | 0.00262 |
| rs4320451  | 7 | 5123397  | A | 0.01339 |
| rs6651076  | 7 | 5439831  | A | 0.00461 |
| rs12536325 | 7 | 7164598  | G | 0.00244 |
| rs10279432 | 7 | 7245535  | C | 0.00120 |
| rs7804592  | 7 | 7266161  | G | 0.00859 |
| rs1294620  | 7 | 7358756  | G | 0.01464 |
| rs1294622  | 7 | 7359239  | T | 0.00474 |
| rs6974119  | 7 | 7370503  | A | 0.01532 |
| rs1473213  | 7 | 7835277  | C | 0.00261 |
| rs6975902  | 7 | 7930763  | T | 0.00474 |
| rs3779370  | 7 | 8182000  | C | 0.01156 |
| rs3823820  | 7 | 8209565  | T | 0.00226 |
| rs3807806  | 7 | 8266516  | T | 0.00165 |
| rs2110521  | 7 | 8362245  | A | 0.00006 |
| rs12702727 | 7 | 8390982  | T | 0.01506 |
| rs6463805  | 7 | 8414480  | G | 0.00120 |
| rs17332138 | 7 | 8460888  | G | 0.00672 |
| rs13240191 | 7 | 8880293  | T | 0.00413 |
| rs16874588 | 7 | 8887669  | T | 0.00331 |
| rs13240893 | 7 | 9061487  | T | 0.00045 |
| rs12702864 | 7 | 9086521  | G | 0.01084 |
| rs10266583 | 7 | 9144987  | G | 0.00099 |
| rs449245   | 7 | 9179513  | T | 0.00127 |
| rs369785   | 7 | 9180202  | A | 0.00221 |
| rs17792244 | 7 | 9200867  | C | 0.00799 |
| rs2350432  | 7 | 9242493  | A | 0.01475 |
| rs2713342  | 7 | 9512802  | G | 0.00951 |
| rs4548084  | 7 | 9526119  | C | 0.01304 |
| rs1505310  | 7 | 9534049  | T | 0.00322 |
| rs10245938 | 7 | 9535960  | G | 0.01568 |
| rs17161716 | 7 | 9538623  | C | 0.00165 |
| rs1505322  | 7 | 9612145  | A | 0.01412 |
| rs1354607  | 7 | 9612572  | T | 0.01035 |
| rs6974358  | 7 | 9646685  | T | 0.00572 |
| rs10255183 | 7 | 9954672  | G | 0.01174 |
| rs17162535 | 7 | 10063618 | A | 0.00647 |
| rs12702976 | 7 | 10087591 | A | 0.00565 |
| rs12702978 | 7 | 10090856 | G | 0.01144 |
| rs6959382  | 7 | 10227487 | G | 0.01395 |

|            |   |          |   |          |
|------------|---|----------|---|----------|
| rs4720876  | 7 | 10339966 | T | 0.00792  |
| rs6463990  | 7 | 10344828 | G | 0.00509  |
| rs7794021  | 7 | 11364881 | G | 12.20000 |
| rs1468244  | 7 | 11431856 | C | 0.00512  |
| rs1014184  | 7 | 11468053 | C | 0.00051  |
| rs17165507 | 7 | 12019983 | C | 0.00337  |
| rs12536861 | 7 | 12085773 | A | 0.01406  |
| rs10950385 | 7 | 12121572 | A | 0.00989  |
| rs2192838  | 7 | 12306749 | T | 0.00928  |
| rs17165896 | 7 | 12369514 | T | 0.00810  |
| rs17166013 | 7 | 12409567 | T | 0.01607  |
| rs17166041 | 7 | 12473257 | T | 0.01066  |
| rs4365982  | 7 | 12536902 | C | 0.01313  |
| rs977201   | 7 | 12995499 | G | 0.00852  |
| rs9986861  | 7 | 13845989 | T | 0.00448  |
| rs2190060  | 7 | 14083642 | C | 0.00485  |
| rs34628921 | 7 | 14423427 | A | 0.01005  |
| rs196751   | 7 | 14443632 | T | 0.00467  |
| rs7806004  | 7 | 14590429 | A | 0.01322  |
| rs4236282  | 7 | 14670939 | T | 0.01036  |
| rs978175   | 7 | 14837929 | C | 0.01108  |
| rs975689   | 7 | 14857727 | C | 0.01196  |
| rs36858    | 7 | 14931688 | G | 4.38100  |
| rs7798124  | 7 | 15022141 | G | 0.00824  |
| rs218078   | 7 | 15049059 | G | 0.00343  |
| rs12672546 | 7 | 15096179 | T | 0.00695  |
| rs758297   | 7 | 15673970 | A | 0.00067  |
| rs37417    | 7 | 15751248 | T | 0.01307  |
| rs11772541 | 7 | 16520773 | A | 0.00793  |
| rs10228487 | 7 | 16558354 | G | 0.01395  |
| rs17627078 | 7 | 16707805 | A | 0.00268  |
| rs2389827  | 7 | 17627791 | T | 0.00458  |
| rs12699903 | 7 | 17739744 | G | 0.00733  |
| rs2723497  | 7 | 17792353 | T | 0.01224  |
| rs2723501  | 7 | 17821057 | A | 0.01430  |
| rs4544985  | 7 | 17950332 | C | 0.01346  |
| rs801763   | 7 | 18567890 | A | 0.00975  |
| rs17352682 | 7 | 19304877 | C | 0.00932  |
| rs6967671  | 7 | 19353457 | A | 0.01270  |
| rs9639329  | 7 | 19366356 | T | 0.00283  |
| rs2190413  | 7 | 19924911 | A | 0.01330  |
| rs13237702 | 7 | 19928899 | C | 0.00398  |
| rs38151    | 7 | 20015540 | C | 0.01281  |
| rs1558310  | 7 | 20315252 | G | 0.00182  |

|            |   |          |   |         |
|------------|---|----------|---|---------|
| rs3807945  | 7 | 20382351 | T | 0.01335 |
| rs17143128 | 7 | 20591415 | T | 0.01340 |
| rs10950819 | 7 | 20600261 | T | 0.00821 |
| rs12669250 | 7 | 20649972 | C | 0.00577 |
| rs6461521  | 7 | 20911047 | A | 0.00435 |
| rs2700300  | 7 | 21259201 | A | 0.00978 |
| rs17144727 | 7 | 21596214 | G | 0.00435 |
| rs2965396  | 7 | 21694856 | C | 0.00567 |
| rs10256021 | 7 | 21768403 | T | 0.00289 |
| rs1730913  | 7 | 22024102 | A | 0.01115 |
| rs13225921 | 7 | 22319771 | A | 0.00407 |
| rs1859742  | 7 | 22357645 | G | 0.01160 |
| rs2905324  | 7 | 22675528 | C | 0.01085 |
| rs4722173  | 7 | 22753341 | A | 0.00571 |
| rs12536091 | 7 | 22794725 | C | 0.00483 |
| rs2286498  | 7 | 22824029 | T | 0.00375 |
| rs10232205 | 7 | 23197079 | C | 0.00122 |
| rs274047   | 7 | 23350222 | G | 0.00092 |
| rs10950957 | 7 | 23729805 | G | 0.00472 |
| rs6957981  | 7 | 23859818 | A | 0.00320 |
| rs7792262  | 7 | 23882268 | T | 0.00030 |
| rs17148510 | 7 | 23922398 | A | 0.01663 |
| rs7780155  | 7 | 23924393 | C | 0.00988 |
| rs1859289  | 7 | 24139848 | G | 0.00166 |
| rs198712   | 7 | 24147580 | C | 0.00956 |
| rs156318   | 7 | 24179881 | G | 0.01193 |
| rs156308   | 7 | 24184522 | A | 0.01146 |
| rs16217    | 7 | 24224231 | G | 0.00409 |
| rs17149415 | 7 | 24409011 | A | 0.01058 |
| rs2521757  | 7 | 24728194 | T | 0.01514 |
| rs11974649 | 7 | 24940525 | T | 0.00314 |
| rs10252578 | 7 | 25332075 | A | 0.01371 |
| rs6946189  | 7 | 25966662 | A | 0.00801 |
| rs4722557  | 7 | 25986081 | T | 0.00451 |
| rs17322608 | 7 | 26075962 | A | 0.01463 |
| rs7807030  | 7 | 26183975 | T | 0.01635 |
| rs10259620 | 7 | 27168814 | A | 0.01275 |
| rs10951169 | 7 | 27522439 | T | 0.01238 |
| rs3823945  | 7 | 27839643 | T | 0.00930 |
| rs11981911 | 7 | 27854539 | T | 0.00416 |
| rs11763181 | 7 | 27951583 | A | 0.00666 |
| rs7801967  | 7 | 28211820 | T | 0.01272 |
| rs17717216 | 7 | 28448949 | T | 0.01583 |
| rs6977204  | 7 | 28460970 | A | 0.00074 |



|            |   |          |   |         |
|------------|---|----------|---|---------|
| rs35010731 | 7 | 28759930 | G | 0.00736 |
| rs4722842  | 7 | 28766752 | A | 0.01191 |
| rs35910392 | 7 | 28784337 | G | 0.00586 |
| rs4722855  | 7 | 28805091 | C | 0.01468 |
| rs6977628  | 7 | 28811671 | A | 0.00748 |
| rs4722858  | 7 | 28845849 | A | 0.00660 |
| rs768229   | 7 | 28857274 | A | 0.00366 |
| rs506511   | 7 | 29032843 | G | 0.00413 |
| rs10486610 | 7 | 29222954 | C | 0.01080 |
| rs39077    | 7 | 29245037 | T | 0.00036 |
| rs7779958  | 7 | 29315941 | T | 0.00011 |
| rs3828983  | 7 | 29448465 | A | 0.00900 |
| rs3857731  | 7 | 29458573 | A | 0.00892 |
| rs7781003  | 7 | 29483175 | G | 0.00472 |
| rs7782556  | 7 | 29517235 | G | 0.00098 |
| rs17158518 | 7 | 29938482 | G | 0.00601 |
| rs17158543 | 7 | 29949671 | T | 0.00325 |
| rs10260668 | 7 | 30146934 | A | 0.01438 |
| rs10278661 | 7 | 31328137 | C | 0.01539 |
| rs7812214  | 7 | 31362003 | A | 0.01510 |
| rs6977919  | 7 | 31495133 | T | 0.00251 |
| rs7803617  | 7 | 31515561 | G | 0.00454 |
| rs10228992 | 7 | 31515779 | G | 0.00108 |
| rs38327    | 7 | 31610170 | T | 0.00271 |
| rs38379    | 7 | 31639395 | G | 0.00335 |
| rs3735424  | 7 | 31658222 | C | 0.00009 |
| rs1035028  | 7 | 31833575 | A | 0.00799 |
| rs17336340 | 7 | 32014641 | A | 0.00448 |
| rs30564    | 7 | 32034427 | C | 0.01077 |
| rs17160851 | 7 | 32070157 | T | 0.01588 |
| rs7803347  | 7 | 32235840 | C | 0.00199 |
| rs12538506 | 7 | 32243806 | T | 0.00048 |
| rs6955946  | 7 | 32322564 | G | 0.00438 |
| rs7806498  | 7 | 33322149 | G | 0.00858 |
| rs17790181 | 7 | 34853083 | G | 0.01511 |
| rs10266513 | 7 | 35559637 | G | 0.00716 |
| rs17171927 | 7 | 35834387 | G | 0.00290 |
| rs2700910  | 7 | 36170522 | A | 0.00089 |
| rs2726059  | 7 | 36194992 | G | 0.01218 |
| rs1986877  | 7 | 36535036 | C | 0.00126 |
| rs7787226  | 7 | 36817679 | G | 0.01299 |
| rs1882082  | 7 | 36936199 | A | 0.00286 |
| rs9655380  | 7 | 37313843 | T | 0.00468 |
| rs2701003  | 7 | 37314747 | C | 0.01008 |

|            |   |          |   |         |
|------------|---|----------|---|---------|
| rs2724000  | 7 | 37399229 | C | 0.00226 |
| rs7777579  | 7 | 37543199 | A | 0.00566 |
| rs2598044  | 7 | 37856841 | T | 0.00096 |
| rs1562829  | 7 | 37930141 | G | 0.01480 |
| rs17171240 | 7 | 37991099 | C | 0.00065 |
| rs2736947  | 7 | 38353316 | C | 0.00625 |
| rs1558618  | 7 | 38407765 | G | 0.01456 |
| rs17171407 | 7 | 38596958 | G | 0.00187 |
| rs11760386 | 7 | 38643473 | G | 0.01355 |
| rs3801140  | 7 | 38768570 | C | 0.00757 |
| rs4723793  | 7 | 38812386 | G | 0.00769 |
| rs10255290 | 7 | 38925791 | G | 0.01200 |
| rs859516   | 7 | 38993419 | T | 0.00732 |
| rs10248136 | 7 | 39043922 | G | 0.00736 |
| rs17619162 | 7 | 39335134 | C | 0.00869 |
| rs1113117  | 7 | 39619158 | T | 0.01575 |
| rs7778955  | 7 | 39707012 | A | 0.01586 |
| rs2158549  | 7 | 39708450 | C | 0.00071 |
| rs6969419  | 7 | 40236108 | C | 0.00625 |
| rs2190261  | 7 | 40441461 | A | 0.00567 |
| rs6948724  | 7 | 40622800 | A | 0.01649 |
| rs10486710 | 7 | 41282111 | T | 0.01135 |
| rs2237436  | 7 | 41697456 | C | 0.01534 |
| rs2237435  | 7 | 41697578 | C | 0.00595 |
| rs10951660 | 7 | 41776860 | A | 0.00812 |
| rs1476666  | 7 | 41905263 | G | 0.00225 |
| rs6952496  | 7 | 41940034 | T | 0.00764 |
| rs6463097  | 7 | 42254158 | C | 0.01023 |
| rs1560617  | 7 | 42414251 | C | 0.00142 |
| rs12333485 | 7 | 42417749 | A | 0.00790 |
| rs11766021 | 7 | 42465448 | A | 0.00057 |
| rs17708673 | 7 | 43035909 | T | 0.01648 |
| rs4294091  | 7 | 44321565 | G | 0.00259 |
| rs1557934  | 7 | 44988782 | G | 0.01059 |
| rs6969223  | 7 | 45021739 | T | 0.00953 |
| rs1294966  | 7 | 45040324 | G | 0.01344 |
| rs3735486  | 7 | 45071642 | A | 0.01333 |
| rs3757572  | 7 | 45113181 | C | 0.01483 |
| rs10224439 | 7 | 45147446 | A | 0.01453 |
| rs1294882  | 7 | 45214560 | G | 0.00670 |
| rs13246285 | 7 | 45259854 | C | 0.01220 |
| rs6964415  | 7 | 46209108 | C | 0.01283 |
| rs13239088 | 7 | 46381408 | T | 0.01073 |
| rs4352752  | 7 | 46866749 | T | 0.01353 |

|            |   |          |   |         |
|------------|---|----------|---|---------|
| rs10245153 | 7 | 47009631 | T | 0.00502 |
| rs12533855 | 7 | 47043330 | G | 0.01255 |
| rs7801951  | 7 | 47106004 | A | 0.01185 |
| rs2728472  | 7 | 47199448 | A | 0.00815 |
| rs17172850 | 7 | 47308808 | A | 0.01325 |
| rs7787946  | 7 | 47756443 | A | 0.00246 |
| rs17659868 | 7 | 47839126 | C | 0.00753 |
| rs10499672 | 7 | 48059930 | C | 0.01511 |
| rs7803787  | 7 | 48060754 | T | 0.00738 |
| rs10280481 | 7 | 48471207 | T | 0.00273 |
| rs4403359  | 7 | 49137610 | T | 0.01079 |
| rs12718242 | 7 | 50123913 | A | 0.00705 |
| rs17634369 | 7 | 50292020 | A | 0.01078 |
| rs1376523  | 7 | 50536835 | C | 0.01415 |
| rs4947934  | 7 | 50871640 | A | 0.00920 |
| rs984450   | 7 | 50892690 | C | 0.00631 |
| rs17134354 | 7 | 51662186 | T | 0.01030 |
| rs7791504  | 7 | 51697174 | T | 2.42000 |
| rs17580955 | 7 | 51776473 | G | 0.01476 |
| rs10488099 | 7 | 51780004 | C | 0.01088 |
| rs7785376  | 7 | 51923383 | A | 0.00831 |
| rs387130   | 7 | 51999593 | A | 0.00843 |
| rs417184   | 7 | 52003163 | A | 0.01279 |
| rs6947141  | 7 | 52296516 | C | 0.00256 |
| rs1837904  | 7 | 52573340 | C | 0.00789 |
| rs1404883  | 7 | 53120423 | A | 0.00331 |
| rs1852158  | 7 | 53175560 | G | 0.01121 |
| rs1548000  | 7 | 53517374 | A | 0.00027 |
| rs17695021 | 7 | 53582894 | T | 0.01084 |
| rs17564776 | 7 | 54855553 | A | 0.01647 |
| rs6962925  | 7 | 54872385 | A | 0.00522 |
| rs6593195  | 7 | 54931888 | G | 0.01411 |
| rs17583407 | 7 | 54933847 | G | 0.00094 |
| rs4947957  | 7 | 54998998 | T | 0.00914 |
| rs2030807  | 7 | 55345979 | G | 0.01015 |
| rs2177807  | 7 | 55358496 | G | 0.01620 |
| rs6593233  | 7 | 55373694 | C | 0.00127 |
| rs11764362 | 7 | 55571119 | A | 0.01342 |
| rs4948051  | 7 | 55655594 | A | 0.00148 |
| rs698645   | 7 | 56189309 | A | 0.00017 |
| rs17748612 | 7 | 62120851 | C | 0.00422 |
| rs1153014  | 7 | 62910986 | A | 0.01506 |
| rs10949880 | 7 | 63308111 | T | 0.00183 |
| rs2164110  | 7 | 63328963 | A | 0.00530 |

|            |   |          |   |         |
|------------|---|----------|---|---------|
| rs687547   | 7 | 63382364 | G | 0.01511 |
| rs10949887 | 7 | 63389515 | T | 0.01157 |
| rs17768351 | 7 | 63393541 | A | 0.01658 |
| rs10949909 | 7 | 63473967 | A | 0.00376 |
| rs12530839 | 7 | 63480341 | T | 0.01649 |
| rs34764583 | 7 | 63606271 | C | 0.01041 |
| rs1917563  | 7 | 65053082 | T | 0.00077 |
| rs6946143  | 7 | 65217157 | C | 0.00622 |
| rs10950029 | 7 | 65271756 | A | 0.00267 |
| rs4292583  | 7 | 67132144 | G | 0.01417 |
| rs17681926 | 7 | 67133594 | T | 0.00173 |
| rs12698679 | 7 | 67324499 | A | 0.00610 |
| rs6971845  | 7 | 67395195 | G | 2.05500 |
| rs12698688 | 7 | 67406049 | C | 5.79400 |
| rs11768294 | 7 | 67807177 | T | 0.01510 |
| rs880330   | 7 | 67842575 | A | 0.01258 |
| rs7778229  | 7 | 68489457 | C | 0.00960 |
| rs41867    | 7 | 68634970 | A | 0.01086 |
| rs17141666 | 7 | 69566427 | T | 0.00986 |
| rs17141991 | 7 | 69774701 | G | 0.00241 |
| rs7793102  | 7 | 69786612 | T | 0.00934 |
| rs11764092 | 7 | 69835520 | C | 0.00066 |
| rs6460553  | 7 | 69853160 | A | 0.00611 |
| rs4719045  | 7 | 70093809 | G | 0.00615 |
| rs6969013  | 7 | 70129334 | C | 0.01323 |
| rs17142629 | 7 | 70272391 | T | 0.01210 |
| rs9638618  | 7 | 70407628 | A | 0.00934 |
| rs9638627  | 7 | 70693047 | A | 0.00970 |
| rs1608875  | 7 | 70792015 | C | 0.00565 |
| rs17426915 | 7 | 71051264 | G | 0.01468 |
| rs4318932  | 7 | 71680977 | C | 0.00632 |
| rs10279483 | 7 | 73331779 | A | 0.00068 |
| rs17361077 | 7 | 75276699 | C | 0.00110 |
| rs11972240 | 7 | 75532015 | C | 0.00707 |
| rs10476    | 7 | 75534356 | C | 0.00598 |
| rs7794454  | 7 | 75613946 | A | 0.00534 |
| rs9800948  | 7 | 75648409 | G | 0.00088 |
| rs7810066  | 7 | 76689259 | A | 0.00332 |
| rs17230010 | 7 | 76708934 | C | 0.00266 |
| rs17156320 | 7 | 77138046 | A | 0.01595 |
| rs17807185 | 7 | 77146231 | G | 0.01469 |
| rs12113119 | 7 | 77152754 | C | 0.01547 |
| rs3807745  | 7 | 77555379 | G | 0.00145 |
| rs4296979  | 7 | 77583217 | G | 0.01028 |

|            |   |          |   |         |
|------------|---|----------|---|---------|
| rs17149367 | 7 | 77624277 | A | 0.00072 |
| rs12536887 | 7 | 77710003 | T | 0.01226 |
| rs10485886 | 7 | 77895776 | C | 0.00845 |
| rs11525066 | 7 | 78013913 | T | 0.01455 |
| rs17372719 | 7 | 78028121 | C | 0.01383 |
| rs521311   | 7 | 78305657 | G | 0.01275 |
| rs7782585  | 7 | 78722211 | A | 0.00174 |
| rs9969364  | 7 | 78873419 | A | 0.01438 |
| rs6949888  | 7 | 79076650 | A | 0.00744 |
| rs10499845 | 7 | 79158483 | T | 0.01340 |
| rs6966238  | 7 | 79551009 | T | 0.01361 |
| rs306709   | 7 | 79732430 | T | 0.00678 |
| rs17260734 | 7 | 79981291 | T | 0.00594 |
| rs17260769 | 7 | 79981364 | C | 0.01037 |
| rs763479   | 7 | 80659147 | A | 0.00125 |
| rs6961599  | 7 | 80944560 | T | 0.00032 |
| rs7786648  | 7 | 81080173 | C | 0.00553 |
| rs17155272 | 7 | 81086746 | T | 0.01109 |
| rs10257186 | 7 | 81617435 | A | 0.00162 |
| rs17264194 | 7 | 81813537 | C | 0.01445 |
| rs2368021  | 7 | 81821560 | A | 0.00011 |
| rs6975142  | 7 | 81855385 | T | 0.00037 |
| rs13438494 | 7 | 82226650 | T | 0.01526 |
| rs34608268 | 7 | 82233177 | C | 0.01441 |
| rs10954689 | 7 | 82240309 | C | 0.00761 |
| rs7795945  | 7 | 82322986 | C | 0.01541 |
| rs1986742  | 7 | 82341378 | C | 0.01587 |
| rs1557784  | 7 | 82682474 | C | 0.00392 |
| rs2709890  | 7 | 82883620 | T | 0.01612 |
| rs533887   | 7 | 83136139 | T | 0.00636 |
| rs17216863 | 7 | 83194778 | C | 0.00977 |
| rs17158535 | 7 | 83502065 | A | 0.01085 |
| rs12669854 | 7 | 83543343 | T | 0.01029 |
| rs520536   | 7 | 83802374 | C | 8.26600 |
| rs1236923  | 7 | 83939710 | C | 0.00434 |
| rs4728560  | 7 | 84197220 | G | 0.00468 |
| rs11764839 | 7 | 84281713 | C | 0.01318 |
| rs12672643 | 7 | 84291220 | T | 0.00423 |
| rs4395839  | 7 | 84291612 | T | 0.00068 |
| rs7799648  | 7 | 84341515 | T | 0.01044 |
| rs1013264  | 7 | 84658419 | G | 0.01335 |
| rs1911993  | 7 | 85285979 | T | 0.00779 |
| rs10280835 | 7 | 85368185 | T | 0.01570 |
| rs17313775 | 7 | 85436441 | G | 0.01303 |

|            |   |           |   |         |
|------------|---|-----------|---|---------|
| rs17316106 | 7 | 85509840  | T | 0.01594 |
| rs12704280 | 7 | 86079324  | G | 0.01457 |
| rs2888551  | 7 | 86225947  | G | 0.01413 |
| rs17160978 | 7 | 86243244  | T | 0.00102 |
| rs17161024 | 7 | 86298766  | G | 0.01582 |
| rs10952891 | 7 | 86305187  | C | 0.01570 |
| rs6946119  | 7 | 86966801  | C | 0.01319 |
| rs2282949  | 7 | 87471440  | A | 0.00441 |
| rs10268574 | 7 | 87606110  | C | 0.01160 |
| rs916849   | 7 | 87784913  | A | 0.00821 |
| rs181097   | 7 | 87922975  | G | 0.01150 |
| rs10237276 | 7 | 88279872  | T | 0.01477 |
| rs6465247  | 7 | 89662413  | G | 0.00601 |
| rs11563560 | 7 | 89698381  | C | 0.00551 |
| rs194534   | 7 | 89709068  | G | 0.01030 |
| rs2040514  | 7 | 89763497  | A | 0.00684 |
| rs7796430  | 7 | 90203764  | A | 0.00056 |
| rs10281519 | 7 | 90747960  | T | 0.00463 |
| rs1209001  | 7 | 91278295  | T | 0.00531 |
| rs2269811  | 7 | 91347487  | G | 0.00514 |
| rs403      | 7 | 91379438  | T | 0.01083 |
| rs10488509 | 7 | 91455027  | G | 0.00150 |
| rs11769780 | 7 | 91694752  | A | 0.01437 |
| rs12740    | 7 | 91867238  | A | 0.00703 |
| rs4729068  | 7 | 92516838  | G | 0.00198 |
| rs6971944  | 7 | 92553794  | C | 0.00657 |
| rs2528552  | 7 | 93117418  | T | 0.00966 |
| rs13229259 | 7 | 93440637  | G | 0.00664 |
| rs726820   | 7 | 93449846  | T | 0.00915 |
| rs10953111 | 7 | 93783391  | A | 0.00987 |
| rs12704838 | 7 | 95713592  | C | 0.00660 |
| rs12536064 | 7 | 95854947  | A | 0.00944 |
| rs10953178 | 7 | 95968574  | C | 0.00973 |
| rs6465528  | 7 | 96053584  | C | 0.00234 |
| rs2272225  | 7 | 96146957  | A | 0.01254 |
| rs10486858 | 7 | 96378364  | G | 0.00095 |
| rs6956369  | 7 | 96453948  | T | 0.01273 |
| rs4480045  | 7 | 96736110  | G | 0.00412 |
| rs2394625  | 7 | 96806264  | G | 0.01059 |
| rs2525549  | 7 | 99371047  | T | 0.01539 |
| rs16869529 | 7 | 101523084 | G | 0.00646 |
| rs10953363 | 7 | 101811250 | T | 0.01531 |
| rs17475512 | 7 | 102299724 | G | 0.01467 |
| rs10487172 | 7 | 103189479 | G | 0.01299 |

|            |   |           |   |         |
|------------|---|-----------|---|---------|
| rs13233763 | 7 | 103271612 | A | 0.00993 |
| rs2283034  | 7 | 103305285 | G | 0.00053 |
| rs10487180 | 7 | 103406534 | A | 0.00621 |
| rs12539921 | 7 | 103480415 | T | 0.01292 |
| rs4730006  | 7 | 103825729 | A | 0.00747 |
| rs17639782 | 7 | 104401900 | A | 0.00654 |
| rs2299305  | 7 | 104578311 | G | 0.00624 |
| rs2668882  | 7 | 104935136 | A | 0.00152 |
| rs17152355 | 7 | 105362438 | A | 0.00102 |
| rs6954754  | 7 | 105609420 | A | 0.00805 |
| rs6951857  | 7 | 105620778 | A | 0.00241 |
| rs4382396  | 7 | 105664944 | G | 0.00352 |
| rs4730253  | 7 | 107148672 | G | 0.00604 |
| rs4730259  | 7 | 107183738 | T | 0.01596 |
| rs2052314  | 7 | 107775954 | A | 0.00855 |
| rs16872525 | 7 | 107812351 | A | 0.00344 |
| rs3922355  | 7 | 108317456 | G | 0.01166 |
| rs9690782  | 7 | 108319365 | A | 0.01211 |
| rs2037048  | 7 | 108517632 | C | 0.01296 |
| rs1723631  | 7 | 109534294 | T | 0.01342 |
| rs258984   | 7 | 110321238 | A | 0.00083 |
| rs7809411  | 7 | 110447291 | A | 0.00408 |
| rs2107147  | 7 | 110520953 | T | 0.01060 |
| rs258922   | 7 | 110833204 | T | 0.00382 |
| rs17158713 | 7 | 111109991 | A | 0.00437 |
| rs2560656  | 7 | 111540083 | G | 0.00908 |
| rs10953704 | 7 | 111596431 | A | 0.00408 |
| rs10216230 | 7 | 112140548 | A | 0.01091 |
| rs10215501 | 7 | 112140676 | G | 0.00670 |
| rs10271752 | 7 | 112187296 | G | 0.00954 |
| rs2396570  | 7 | 112230777 | T | 0.00880 |
| rs3957315  | 7 | 112231329 | T | 0.00947 |
| rs821785   | 7 | 112252077 | T | 0.01565 |
| rs821787   | 7 | 112263992 | G | 0.01580 |
| rs6948575  | 7 | 112287160 | A | 0.01226 |
| rs685259   | 7 | 112323976 | G | 0.01460 |
| rs2974945  | 7 | 113301392 | G | 0.01221 |
| rs13237006 | 7 | 114445722 | T | 0.00651 |
| rs7806678  | 7 | 114627935 | A | 0.01240 |
| rs7782721  | 7 | 114670626 | G | 0.00016 |
| rs2188540  | 7 | 114751682 | A | 0.00284 |
| rs4320477  | 7 | 115277912 | T | 0.00412 |
| rs10239692 | 7 | 115704176 | C | 0.00057 |
| rs193588   | 7 | 116638006 | G | 0.00129 |

|            |   |           |   |         |
|------------|---|-----------|---|---------|
| rs11487118 | 7 | 118571989 | C | 0.01279 |
| rs7805413  | 7 | 119754163 | C | 0.00370 |
| rs10257987 | 7 | 120012531 | T | 0.01611 |
| rs9886190  | 7 | 120018452 | G | 0.01153 |
| rs2049643  | 7 | 120018941 | C | 0.01333 |
| rs10277086 | 7 | 120022020 | G | 0.00577 |
| rs2244863  | 7 | 120410072 | C | 0.00690 |
| rs4731007  | 7 | 120691895 | C | 0.01434 |
| rs2707461  | 7 | 120774586 | C | 0.01661 |
| rs2536163  | 7 | 120790146 | G | 0.01651 |
| rs12706408 | 7 | 121768078 | T | 0.01603 |
| rs10268368 | 7 | 122127346 | T | 0.00798 |
| rs1308711  | 7 | 122415221 | A | 0.00877 |
| rs12666974 | 7 | 122979210 | T | 0.01056 |
| rs17146118 | 7 | 122997918 | T | 0.00228 |
| rs619575   | 7 | 123180696 | C | 0.01603 |
| rs17703063 | 7 | 123291556 | C | 0.00682 |
| rs2191277  | 7 | 123581273 | C | 0.01365 |
| rs1600739  | 7 | 124426842 | A | 0.00312 |
| rs13244183 | 7 | 124673162 | G | 0.00231 |
| rs10500106 | 7 | 124779451 | T | 0.01442 |
| rs12706650 | 7 | 124782413 | G | 0.00393 |
| rs10808221 | 7 | 124817406 | C | 0.01147 |
| rs11766248 | 7 | 124817455 | T | 0.01225 |
| rs17148961 | 7 | 125215105 | A | 0.00864 |
| rs6979193  | 7 | 125371603 | T | 0.00263 |
| rs12706717 | 7 | 125527081 | G | 0.01500 |
| rs7792592  | 7 | 126083177 | G | 0.00935 |
| rs10487483 | 7 | 126861374 | G | 0.00140 |
| rs10273635 | 7 | 126945593 | C | 0.01091 |
| rs698408   | 7 | 127133172 | T | 0.01622 |
| rs12667197 | 7 | 127156383 | T | 0.01420 |
| rs2241291  | 7 | 127426110 | G | 0.01175 |
| rs1451006  | 7 | 127637891 | T | 0.00046 |
| rs2060715  | 7 | 127686365 | A | 6.74300 |
| rs1495458  | 7 | 128390228 | A | 0.01571 |
| rs12155080 | 7 | 128445975 | C | 0.00110 |
| rs13223151 | 7 | 128916976 | C | 0.01049 |
| rs17164742 | 7 | 129645173 | T | 0.00506 |
| rs10954264 | 7 | 129664510 | C | 0.01563 |
| rs9641869  | 7 | 129703266 | C | 0.00713 |
| rs13221321 | 7 | 130544382 | T | 0.01151 |
| rs10272488 | 7 | 130971372 | G | 0.01563 |
| rs10257021 | 7 | 130971538 | G | 0.00510 |



|            |   |           |   |         |
|------------|---|-----------|---|---------|
| rs2971772  | 7 | 131058210 | G | 0.00410 |
| rs1106683  | 7 | 131104065 | T | 0.00950 |
| rs1106684  | 7 | 131104205 | C | 0.01495 |
| rs4535659  | 7 | 131104596 | A | 0.00359 |
| rs10954327 | 7 | 131108546 | G | 0.00648 |
| rs9656405  | 7 | 131165524 | A | 0.01320 |
| rs6944918  | 7 | 131167742 | G | 0.00551 |
| rs1004592  | 7 | 131168465 | A | 0.00066 |
| rs11975237 | 7 | 131168939 | G | 0.00889 |
| rs10488343 | 7 | 131224861 | G | 0.01493 |
| rs734689   | 7 | 131731485 | A | 0.01501 |
| rs156932   | 7 | 131804990 | G | 0.01637 |
| rs125095   | 7 | 131842267 | G | 0.00703 |
| rs17823517 | 7 | 131848275 | G | 0.01157 |
| rs156978   | 7 | 131854448 | T | 0.01001 |
| rs1426496  | 7 | 131886201 | G | 0.01456 |
| rs527159   | 7 | 132037053 | T | 0.00318 |
| rs623098   | 7 | 132040626 | C | 0.00496 |
| rs998827   | 7 | 132137536 | T | 0.01363 |
| rs13246875 | 7 | 132140892 | A | 0.00266 |
| rs17422732 | 7 | 132392028 | T | 0.01347 |
| rs10245117 | 7 | 132436682 | C | 0.00638 |
| rs17167646 | 7 | 133558993 | G | 0.00001 |
| rs11771203 | 7 | 134077222 | T | 0.00192 |
| rs3304     | 7 | 134147771 | A | 0.01360 |
| rs6956447  | 7 | 134151672 | A | 0.01518 |
| rs4732066  | 7 | 134219717 | G | 0.00715 |
| rs292641   | 7 | 134597284 | C | 0.00265 |
| rs17479687 | 7 | 134725373 | G | 0.00533 |
| rs3112354  | 7 | 135043780 | T | 0.00197 |
| rs11762316 | 7 | 135133308 | T | 0.01560 |
| rs10233321 | 7 | 135133591 | A | 0.01465 |
| rs10244209 | 7 | 136030769 | A | 0.00083 |
| rs7792231  | 7 | 136134010 | A | 0.00360 |
| rs2350786  | 7 | 136327110 | A | 0.00086 |
| rs7800093  | 7 | 136339921 | T | 0.01227 |
| rs918974   | 7 | 136421389 | T | 0.01610 |
| rs1725021  | 7 | 136543860 | T | 0.01113 |
| rs832974   | 7 | 136552209 | C | 0.00853 |
| rs17169007 | 7 | 136590958 | C | 0.00345 |
| rs1528099  | 7 | 136818524 | C | 0.00515 |
| rs7456122  | 7 | 136923161 | C | 0.00746 |
| rs274012   | 7 | 137300584 | C | 0.00627 |
| rs2035736  | 7 | 137451205 | C | 0.01290 |

|            |   |           |   |         |
|------------|---|-----------|---|---------|
| rs11769346 | 7 | 138017544 | G | 0.00085 |
| rs878992   | 7 | 138169323 | T | 0.00741 |
| rs1638196  | 7 | 138920471 | G | 0.01604 |
| rs9719540  | 7 | 139021084 | G | 0.00090 |
| rs2270163  | 7 | 139135304 | A | 0.00570 |
| rs4726499  | 7 | 139334473 | G | 0.01648 |
| rs6464779  | 7 | 139804299 | C | 0.00731 |
| rs10216203 | 7 | 139814627 | A | 0.00491 |
| rs1639945  | 7 | 139909578 | G | 0.00174 |
| rs6464123  | 7 | 140218579 | G | 0.00725 |
| rs11762469 | 7 | 140260681 | A | 0.00620 |
| rs553046   | 7 | 140422870 | C | 0.00913 |
| rs491554   | 7 | 140423083 | T | 0.00375 |
| rs7799561  | 7 | 140678009 | G | 0.00119 |
| rs6955319  | 7 | 140733168 | C | 0.00083 |
| rs4726453  | 7 | 140810387 | A | 0.00362 |
| rs3020838  | 7 | 141555389 | C | 0.00769 |
| rs361487   | 7 | 141726987 | C | 0.01134 |
| rs7776874  | 7 | 142035507 | A | 0.00482 |
| rs476826   | 7 | 142616556 | C | 0.00472 |
| rs6948526  | 7 | 142727117 | T | 0.00393 |
| rs4076124  | 7 | 142765004 | T | 0.00252 |
| rs2966712  | 7 | 142877245 | G | 0.00458 |
| rs7804359  | 7 | 143497465 | C | 0.00826 |
| rs6967058  | 7 | 143844410 | G | 0.00124 |
| rs17170146 | 7 | 143910061 | A | 0.01180 |
| rs10487634 | 7 | 143918753 | C | 0.01292 |
| rs4329196  | 7 | 143931363 | T | 0.01626 |
| rs17171057 | 7 | 144116314 | G | 0.00997 |
| rs2692379  | 7 | 144254322 | C | 0.01072 |
| rs10500148 | 7 | 144306637 | C | 0.01583 |
| rs1468375  | 7 | 144665545 | T | 0.00143 |
| rs757797   | 7 | 144768973 | G | 0.00880 |
| rs850503   | 7 | 144938746 | T | 0.01278 |
| rs850465   | 7 | 144962441 | C | 0.00722 |
| rs1917648  | 7 | 145364455 | G | 0.01505 |
| rs965003   | 7 | 145677377 | G | 0.00658 |
| rs6978796  | 7 | 145743361 | T | 0.01087 |
| rs347216   | 7 | 145957748 | A | 0.00197 |
| rs1881723  | 7 | 147588565 | G | 0.00465 |
| rs10952742 | 7 | 147597745 | G | 0.00856 |
| rs1104853  | 7 | 147631587 | C | 0.01154 |
| rs1104852  | 7 | 147631751 | G | 0.01169 |
| rs1177942  | 7 | 147690775 | T | 0.01650 |

|            |   |           |   |         |
|------------|---|-----------|---|---------|
| rs11773084 | 7 | 148089577 | G | 0.01604 |
| rs2373414  | 7 | 148101252 | G | 0.01296 |
| rs1558419  | 7 | 148111166 | C | 0.00176 |
| rs740949   | 7 | 148136997 | T | 0.01604 |
| rs2072408  | 7 | 148139130 | A | 0.00184 |
| rs6464926  | 7 | 148149944 | C | 0.00390 |
| rs17552167 | 7 | 148160855 | A | 0.00399 |
| rs12704084 | 7 | 148545983 | G | 0.00005 |
| rs1202397  | 7 | 148547560 | A | 0.00549 |
| rs2448688  | 7 | 149478220 | T | 0.01068 |
| rs7810209  | 7 | 149784746 | A | 0.01430 |
| rs10277380 | 7 | 149861625 | A | 0.01245 |
| rs10236188 | 7 | 149876189 | T | 0.01497 |
| rs765483   | 7 | 150227241 | T | 0.01195 |
| rs6944935  | 7 | 150357853 | G | 0.01488 |
| rs11766855 | 7 | 150403850 | A | 0.00246 |
| rs7795959  | 7 | 150707507 | T | 0.00341 |
| rs17173202 | 7 | 150916094 | G | 0.00836 |
| rs6464148  | 7 | 150916125 | T | 0.01274 |
| rs1881634  | 7 | 151141504 | G | 0.01363 |
| rs1568734  | 7 | 152166841 | A | 0.00193 |
| rs11761769 | 7 | 152292559 | T | 0.00536 |
| rs10277791 | 7 | 152368741 | G | 0.00021 |
| rs4726244  | 7 | 152410914 | C | 0.00422 |
| rs4346924  | 7 | 152484518 | A | 0.00669 |
| rs10808002 | 7 | 152512297 | A | 0.00219 |
| rs7780487  | 7 | 153642917 | A | 0.00881 |
| rs17174407 | 7 | 153745398 | A | 0.01453 |
| rs11770433 | 7 | 154004818 | A | 0.01307 |
| rs12719718 | 7 | 154092898 | G | 0.00930 |
| rs1525755  | 7 | 154215197 | T | 0.01555 |
| rs7795325  | 7 | 154246349 | C | 0.01420 |
| rs1529082  | 7 | 154577582 | G | 0.01207 |
| rs7800026  | 7 | 154578004 | A | 0.00375 |
| rs7785988  | 7 | 154878544 | T | 0.00517 |
| rs1735004  | 7 | 155634639 | G | 0.00682 |
| rs1181917  | 7 | 155645607 | G | 0.00530 |
| rs12539207 | 7 | 156344327 | C | 0.00175 |
| rs11979077 | 7 | 156441797 | G | 0.00542 |
| rs10237246 | 7 | 157768381 | T | 0.01423 |
| rs1597900  | 7 | 157774945 | C | 0.00433 |
| rs4909173  | 7 | 157781757 | T | 0.01495 |
| rs7800966  | 7 | 157782256 | A | 0.01222 |
| rs6950401  | 7 | 157783490 | G | 0.01523 |

|            |   |           |   |         |
|------------|---|-----------|---|---------|
| rs11769149 | 7 | 157919888 | A | 0.01604 |
| rs1670365  | 7 | 157950730 | G | 0.00467 |
| rs1733133  | 7 | 157957951 | T | 0.01411 |
| rs1632730  | 7 | 157958216 | G | 0.01568 |
| rs11774384 | 8 | 413694    | A | 0.01563 |
| rs17065022 | 8 | 426230    | A | 0.00518 |
| rs1075035  | 8 | 448148    | C | 0.01351 |
| rs17065445 | 8 | 843443    | G | 0.01559 |
| rs13259879 | 8 | 1584180   | A | 0.00856 |
| rs3901161  | 8 | 1632110   | T | 0.01275 |
| rs2977186  | 8 | 1667092   | G | 0.00878 |
| rs6558527  | 8 | 1690318   | G | 0.00090 |
| rs11136437 | 8 | 1801549   | G | 0.01457 |
| rs12681485 | 8 | 1834095   | A | 0.01180 |
| rs7386814  | 8 | 1859902   | C | 0.01348 |
| rs2272611  | 8 | 1864038   | G | 0.00955 |
| rs17752483 | 8 | 2095060   | T | 0.00467 |
| rs6981174  | 8 | 2100948   | A | 0.00565 |
| rs17685416 | 8 | 2101199   | T | 0.01233 |
| rs11990285 | 8 | 2106025   | C | 0.00070 |
| rs17063040 | 8 | 2309171   | G | 0.00387 |
| rs1378261  | 8 | 2646944   | G | 0.00840 |
| rs724654   | 8 | 2675472   | G | 0.00119 |
| rs12681676 | 8 | 2922345   | G | 0.00414 |
| rs13263104 | 8 | 3114063   | G | 0.01530 |
| rs6994942  | 8 | 3114891   | T | 0.01561 |
| rs7008857  | 8 | 3115312   | C | 0.00465 |
| rs7825521  | 8 | 3218353   | C | 0.00915 |
| rs17323568 | 8 | 3430697   | G | 0.01565 |
| rs1158563  | 8 | 3467652   | G | 0.00745 |
| rs1383950  | 8 | 3575030   | A | 0.00529 |
| rs4345580  | 8 | 3575173   | G | 0.00597 |
| rs10102119 | 8 | 3657789   | T | 0.00730 |
| rs17807654 | 8 | 3668924   | A | 0.00482 |
| rs2554503  | 8 | 3812233   | C | 0.01424 |
| rs2552159  | 8 | 3907186   | C | 0.01353 |
| rs17068984 | 8 | 3945357   | G | 0.00628 |
| rs5028014  | 8 | 4033014   | G | 0.01115 |
| rs7013270  | 8 | 4043184   | A | 0.01134 |
| rs11993860 | 8 | 4215491   | A | 0.00187 |
| rs4875363  | 8 | 4431794   | T | 0.01663 |
| rs11136803 | 8 | 4775885   | G | 0.00190 |
| rs7832116  | 8 | 4830337   | G | 0.00840 |
| rs7835703  | 8 | 4931447   | G | 0.00510 |

|            |   |          |   |          |
|------------|---|----------|---|----------|
| rs4495448  | 8 | 5000841  | A | 0.01520  |
| rs7818064  | 8 | 5001153  | G | 0.01336  |
| rs10100560 | 8 | 5128734  | C | 0.00376  |
| rs4552921  | 8 | 5143724  | C | 0.00579  |
| rs7834162  | 8 | 5202059  | G | 0.01209  |
| rs2527758  | 8 | 5408337  | G | 0.00926  |
| rs17355285 | 8 | 5456765  | T | 0.00109  |
| rs6985780  | 8 | 5524031  | C | 0.01510  |
| rs890025   | 8 | 5927228  | A | 0.01165  |
| rs2552238  | 8 | 6019053  | G | 0.00039  |
| rs4997127  | 8 | 6092262  | G | 0.00390  |
| rs4466421  | 8 | 6116508  | T | 0.01483  |
| rs7827867  | 8 | 6123920  | T | 0.01611  |
| rs17533728 | 8 | 6201007  | A | 0.00016  |
| rs1984859  | 8 | 6376832  | G | 0.00928  |
| rs7825811  | 8 | 6522454  | T | 0.01182  |
| rs10108451 | 8 | 6549500  | C | 0.00648  |
| rs2162152  | 8 | 6550411  | A | 0.00968  |
| rs1365042  | 8 | 6557762  | G | 0.00574  |
| rs2911976  | 8 | 6572293  | T | 0.01050  |
| rs2980684  | 8 | 6573272  | T | 0.00625  |
| rs2980683  | 8 | 6573287  | G | 0.01202  |
| rs2928576  | 8 | 6587757  | A | 0.00759  |
| rs2936507  | 8 | 6595480  | T | 0.01380  |
| rs2928579  | 8 | 6597571  | A | 0.01581  |
| rs2911970  | 8 | 6603381  | C | 0.01170  |
| rs2980688  | 8 | 6603545  | A | 0.00389  |
| rs2945839  | 8 | 8238782  | A | 16.26300 |
| rs4840976  | 8 | 8401928  | T | 0.01095  |
| rs13248096 | 8 | 8614886  | T | 0.01030  |
| rs9329169  | 8 | 8728794  | G | 0.00401  |
| rs4841058  | 8 | 8768326  | G | 0.00976  |
| rs403245   | 8 | 8808383  | A | 0.00979  |
| rs373204   | 8 | 8808812  | C | 0.00337  |
| rs13250919 | 8 | 8912648  | G | 0.00762  |
| rs6989707  | 8 | 8915922  | C | 0.00771  |
| rs2100021  | 8 | 8950115  | C | 0.00365  |
| rs17149797 | 8 | 9227381  | A | 0.00475  |
| rs17149989 | 8 | 9308462  | G | 0.01521  |
| rs17733293 | 8 | 9413354  | G | 0.01012  |
| rs9644708  | 8 | 9638327  | G | 0.00209  |
| rs471480   | 8 | 9849872  | T | 0.01376  |
| rs814409   | 8 | 9970776  | A | 0.00891  |
| rs9657539  | 8 | 10293089 | A | 0.01090  |

|            |   |          |   |         |
|------------|---|----------|---|---------|
| rs12543042 | 8 | 10483112 | C | 0.00387 |
| rs17152302 | 8 | 10657436 | T | 0.00752 |
| rs10113332 | 8 | 10691571 | T | 0.00575 |
| rs2245257  | 8 | 11137022 | G | 0.00001 |
| rs7003840  | 8 | 11303541 | T | 0.00503 |
| rs4841529  | 8 | 11322991 | C | 0.00055 |
| rs7018402  | 8 | 11330445 | G | 0.00540 |
| rs12114115 | 8 | 11336016 | C | 0.01396 |
| rs2254891  | 8 | 11378539 | C | 0.00778 |
| rs2409811  | 8 | 11585380 | T | 0.00593 |
| rs4074208  | 8 | 12666865 | A | 0.00720 |
| rs17817461 | 8 | 13314065 | G | 0.00873 |
| rs7840376  | 8 | 13772572 | A | 0.00069 |
| rs1365641  | 8 | 14177997 | C | 0.00212 |
| rs7015616  | 8 | 14218917 | A | 0.00101 |
| rs1461859  | 8 | 14431172 | C | 0.00578 |
| rs1463994  | 8 | 14480611 | G | 0.01600 |
| rs7010545  | 8 | 14515450 | G | 0.01574 |
| rs4831619  | 8 | 14517871 | T | 0.01174 |
| rs12547411 | 8 | 14519569 | G | 0.00652 |
| rs1397293  | 8 | 14549919 | G | 0.01663 |
| rs10503510 | 8 | 14568760 | A | 0.00862 |
| rs12681897 | 8 | 14731549 | A | 0.01363 |
| rs4602887  | 8 | 14763659 | A | 0.01315 |
| rs268386   | 8 | 15076490 | C | 0.00085 |
| rs17472351 | 8 | 15096243 | G | 0.00119 |
| rs7838162  | 8 | 15246310 | T | 0.00346 |
| rs352766   | 8 | 15688930 | C | 0.01035 |
| rs2736017  | 8 | 15759096 | A | 0.00247 |
| rs10096072 | 8 | 15995933 | T | 0.00057 |
| rs7835305  | 8 | 16068755 | A | 0.00589 |
| rs2163120  | 8 | 16165538 | C | 0.01292 |
| rs4831814  | 8 | 16198679 | C | 0.00171 |
| rs1094542  | 8 | 16492644 | A | 0.00364 |
| rs17584028 | 8 | 16557658 | A | 0.01198 |
| rs17123386 | 8 | 16561402 | T | 0.01419 |
| rs6997598  | 8 | 16562352 | T | 0.01618 |
| rs1368538  | 8 | 16592499 | G | 0.01537 |
| rs1620255  | 8 | 16649761 | A | 0.01450 |
| rs17585055 | 8 | 16723732 | C | 0.00747 |
| rs2410441  | 8 | 16801933 | A | 0.01417 |
| rs823580   | 8 | 16803309 | G | 0.00404 |
| rs6990261  | 8 | 16907413 | T | 0.00389 |
| rs2959634  | 8 | 17071223 | T | 0.00587 |

|            |   |          |   |         |
|------------|---|----------|---|---------|
| rs4921744  | 8 | 17202683 | T | 0.01028 |
| rs17590021 | 8 | 17551579 | C | 0.01119 |
| rs209972   | 8 | 17595342 | G | 0.01513 |
| rs2937891  | 8 | 17617387 | T | 0.00751 |
| rs3739408  | 8 | 17657126 | A | 0.01313 |
| rs3739407  | 8 | 17657155 | C | 0.00148 |
| rs2653400  | 8 | 17782361 | G | 0.00534 |
| rs3898982  | 8 | 17905246 | A | 0.00352 |
| rs7465287  | 8 | 17978145 | C | 0.00862 |
| rs9325829  | 8 | 18354351 | T | 0.00678 |
| rs1473482  | 8 | 18641042 | T | 0.00630 |
| rs6586769  | 8 | 18738489 | T | 0.01292 |
| rs12155557 | 8 | 18823979 | C | 0.00994 |
| rs7016207  | 8 | 18977446 | T | 0.00214 |
| rs4922001  | 8 | 19091623 | G | 0.00916 |
| rs9325853  | 8 | 19156865 | C | 0.01379 |
| rs7845057  | 8 | 19234037 | A | 0.00063 |
| rs17128267 | 8 | 19257352 | C | 0.00859 |
| rs17128272 | 8 | 19257994 | T | 0.01538 |
| rs10503654 | 8 | 19260902 | C | 0.01365 |
| rs6586833  | 8 | 19350542 | T | 0.00225 |
| rs41332747 | 8 | 19454071 | T | 0.00950 |
| rs13257337 | 8 | 19526378 | G | 0.00971 |
| rs12549679 | 8 | 19627830 | A | 0.00897 |
| rs17091182 | 8 | 19630705 | T | 0.00164 |
| rs17091190 | 8 | 19630860 | T | 0.00079 |
| rs13253777 | 8 | 20116050 | C | 0.01494 |
| rs7010567  | 8 | 20627791 | T | 0.00151 |
| rs2631923  | 8 | 21119952 | A | 0.01165 |
| rs2610984  | 8 | 21224993 | C | 0.00395 |
| rs4445224  | 8 | 22611014 | C | 0.01383 |
| rs4872539  | 8 | 22632507 | T | 0.01126 |
| rs4872540  | 8 | 22654926 | T | 0.00103 |
| rs11991347 | 8 | 22699268 | G | 0.01119 |
| rs17697763 | 8 | 23386484 | A | 0.01642 |
| rs10866831 | 8 | 23524869 | T | 0.01553 |
| rs1512268  | 8 | 23582408 | G | 0.00393 |
| rs870033   | 8 | 24163410 | C | 0.01185 |
| rs17052096 | 8 | 24424830 | A | 0.00898 |
| rs12546913 | 8 | 24437265 | G | 0.00042 |
| rs10099022 | 8 | 24566691 | C | 0.01365 |
| rs7844382  | 8 | 24785810 | A | 0.01128 |
| rs954257   | 8 | 25306684 | C | 0.01375 |
| rs7815749  | 8 | 25700478 | A | 0.00484 |

|            |   |          |   |          |
|------------|---|----------|---|----------|
| rs7006125  | 8 | 25977877 | T | 0.00076  |
| rs41461444 | 8 | 26033556 | C | 0.00875  |
| rs17055486 | 8 | 26505328 | T | 0.01152  |
| rs17055515 | 8 | 26527021 | T | 0.00192  |
| rs4732626  | 8 | 26638230 | T | 0.01415  |
| rs13261597 | 8 | 26684235 | C | 0.01287  |
| rs6557991  | 8 | 27231225 | G | 0.00063  |
| rs4149256  | 8 | 27455435 | C | 0.00253  |
| rs2010776  | 8 | 27645946 | A | 0.00207  |
| rs6987111  | 8 | 27656369 | A | 0.01610  |
| rs6989156  | 8 | 27660469 | C | 0.01542  |
| rs6989497  | 8 | 27668810 | T | 0.01076  |
| rs10091671 | 8 | 27680859 | T | 0.01410  |
| rs1460224  | 8 | 27694316 | C | 0.01607  |
| rs4732754  | 8 | 27706347 | T | 0.01552  |
| rs4732757  | 8 | 27725167 | C | 0.01612  |
| rs17057911 | 8 | 27729323 | T | 0.01605  |
| rs17057923 | 8 | 27729539 | A | 0.01630  |
| rs7824383  | 8 | 27772520 | A | 0.00636  |
| rs6558023  | 8 | 27787698 | A | 0.00574  |
| rs10156256 | 8 | 28140500 | C | 0.01565  |
| rs189509   | 8 | 28247625 | G | 0.00797  |
| rs719926   | 8 | 29142862 | T | 0.01350  |
| rs6558102  | 8 | 29152772 | G | 0.00562  |
| rs16876410 | 8 | 30047602 | C | 0.00864  |
| rs2938217  | 8 | 30239111 | T | 0.00086  |
| rs2915595  | 8 | 30522359 | A | 0.00570  |
| rs2978296  | 8 | 30694482 | C | 0.00184  |
| rs323369   | 8 | 30845258 | G | 0.00801  |
| rs323375   | 8 | 30850713 | C | 0.00379  |
| rs11574238 | 8 | 31063745 | C | 0.00332  |
| rs2737334  | 8 | 31113009 | C | 0.00382  |
| rs2737339  | 8 | 31133012 | T | 0.01511  |
| rs2737367  | 8 | 31167121 | G | 0.01627  |
| rs2344801  | 8 | 31184184 | A | 0.01256  |
| rs4733239  | 8 | 31264379 | T | 0.01428  |
| rs7005168  | 8 | 31266000 | C | 0.01637  |
| rs6980510  | 8 | 31266118 | G | 0.01645  |
| rs17596255 | 8 | 31294142 | C | 0.01405  |
| rs1546326  | 8 | 31764724 | A | 0.00600  |
| rs10503896 | 8 | 32050583 | A | 17.23800 |
| rs1947734  | 8 | 32057445 | A | 0.01097  |
| rs16879099 | 8 | 32256855 | T | 0.00798  |
| rs16879101 | 8 | 32256902 | T | 0.01230  |



|            |   |          |   |          |
|------------|---|----------|---|----------|
| rs1386438  | 8 | 32315085 | A | 0.01304  |
| rs17645692 | 8 | 32489443 | A | 0.00480  |
| rs13252799 | 8 | 32499495 | A | 0.00283  |
| rs6998559  | 8 | 32991625 | G | 0.00668  |
| rs6998432  | 8 | 33380259 | T | 0.00679  |
| rs10088476 | 8 | 34451364 | A | 0.01454  |
| rs7357540  | 8 | 34561583 | C | 0.01594  |
| rs4549767  | 8 | 34659005 | A | 0.01211  |
| rs10503970 | 8 | 34985910 | A | 0.00579  |
| rs6468300  | 8 | 34988743 | T | 0.00891  |
| rs1451359  | 8 | 35090913 | G | 0.00530  |
| rs12216854 | 8 | 35276445 | A | 0.00254  |
| rs10104759 | 8 | 35423940 | T | 0.00926  |
| rs7001739  | 8 | 35463388 | A | 0.00816  |
| rs10090689 | 8 | 35475675 | C | 0.01151  |
| rs4739412  | 8 | 35476016 | G | 0.00176  |
| rs12544168 | 8 | 35523949 | G | 6.68100  |
| rs6989128  | 8 | 35531300 | A | 0.00892  |
| rs983273   | 8 | 35534272 | G | 12.58500 |
| rs997084   | 8 | 35541296 | T | 0.00640  |
| rs2703872  | 8 | 36497057 | A | 0.01078  |
| rs10090112 | 8 | 36776986 | G | 0.01244  |
| rs12543523 | 8 | 36780844 | G | 0.00540  |
| rs368063   | 8 | 37305026 | C | 0.01306  |
| rs10087363 | 8 | 37466672 | C | 0.00006  |
| rs16887244 | 8 | 38150502 | G | 0.01445  |
| rs2288696  | 8 | 38405382 | C | 0.00174  |
| rs2604497  | 8 | 38592732 | C | 0.01421  |
| rs7816405  | 8 | 38671914 | T | 0.00131  |
| rs6988514  | 8 | 38923786 | G | 0.00532  |
| rs4527834  | 8 | 39121910 | T | 0.00911  |
| rs1376720  | 8 | 39613659 | A | 0.01505  |
| rs9643868  | 8 | 39639013 | A | 0.00277  |
| rs6988389  | 8 | 39640576 | T | 0.00223  |
| rs7821033  | 8 | 40047207 | A | 0.01216  |
| rs16888736 | 8 | 40062757 | C | 0.01346  |
| rs6474237  | 8 | 40181650 | G | 0.00174  |
| rs9643874  | 8 | 40322948 | A | 0.00137  |
| rs7826650  | 8 | 41651413 | G | 0.01567  |
| rs11784321 | 8 | 41733872 | C | 0.01157  |
| rs2974293  | 8 | 42488612 | T | 0.00770  |
| rs9643892  | 8 | 43198024 | A | 0.01621  |
| rs899853   | 8 | 43347778 | G | 0.01169  |
| rs4736856  | 8 | 43449355 | G | 0.00768  |

|            |   |          |   |         |
|------------|---|----------|---|---------|
| rs7463484  | 8 | 43539989 | T | 0.00638 |
| rs7460686  | 8 | 43618302 | T | 0.00130 |
| rs10086987 | 8 | 48208696 | G | 0.00303 |
| rs8178258  | 8 | 48851919 | A | 0.00874 |
| rs7838570  | 8 | 49491077 | T | 0.00357 |
| rs900237   | 8 | 49758694 | T | 0.01056 |
| rs10108023 | 8 | 49880037 | T | 0.00816 |
| rs1023768  | 8 | 49986758 | C | 0.00547 |
| rs10081464 | 8 | 50221260 | G | 0.00383 |
| rs1509086  | 8 | 50255830 | C | 0.01230 |
| rs17527    | 8 | 50257567 | T | 0.00837 |
| rs4873330  | 8 | 50270223 | T | 0.01010 |
| rs7386188  | 8 | 50772493 | A | 0.00870 |
| rs10957894 | 8 | 51454425 | A | 0.00466 |
| rs16915106 | 8 | 51699950 | T | 0.01307 |
| rs2392742  | 8 | 51932422 | T | 0.00573 |
| rs4305894  | 8 | 52860781 | A | 0.01259 |
| rs1015213  | 8 | 53050094 | A | 0.01360 |
| rs192392   | 8 | 53094411 | C | 0.01502 |
| rs16917539 | 8 | 53304268 | G | 0.01007 |
| rs7461434  | 8 | 53338179 | C | 0.00716 |
| rs10087238 | 8 | 53896925 | G | 0.01107 |
| rs2625583  | 8 | 54043684 | T | 0.01373 |
| rs12541632 | 8 | 54065270 | T | 0.01332 |
| rs360973   | 8 | 54071219 | T | 0.01364 |
| rs4873692  | 8 | 54108723 | A | 0.00426 |
| rs894915   | 8 | 54141127 | G | 0.01521 |
| rs4873713  | 8 | 54163602 | A | 0.01320 |
| rs2376432  | 8 | 54166313 | C | 0.01401 |
| rs4873722  | 8 | 54169597 | G | 0.00817 |
| rs4873729  | 8 | 54191589 | C | 0.00412 |
| rs2717637  | 8 | 54201931 | C | 0.01399 |
| rs2553914  | 8 | 54268198 | G | 0.00208 |
| rs7007275  | 8 | 54269163 | T | 0.00448 |
| rs2098884  | 8 | 54343678 | C | 0.00501 |
| rs6986286  | 8 | 54479559 | A | 0.00709 |
| rs17398771 | 8 | 55495352 | T | 0.01088 |
| rs1072739  | 8 | 55576981 | C | 0.00648 |
| rs7821133  | 8 | 55646339 | G | 0.00158 |
| rs6991044  | 8 | 56071878 | C | 0.00822 |
| rs4307317  | 8 | 56073331 | G | 0.01631 |
| rs7009231  | 8 | 56279417 | A | 0.00853 |
| rs4737297  | 8 | 56382904 | G | 0.00713 |
| rs16921802 | 8 | 56501795 | C | 0.00169 |

|            |   |          |   |         |
|------------|---|----------|---|---------|
| rs6995177  | 8 | 56678140 | C | 0.00959 |
| rs11777822 | 8 | 56849821 | A | 0.00698 |
| rs16922296 | 8 | 56942219 | A | 0.01505 |
| rs11985083 | 8 | 57015415 | C | 0.00366 |
| rs16922464 | 8 | 57024296 | T | 0.00524 |
| rs884422   | 8 | 57091969 | T | 0.00415 |
| rs2668000  | 8 | 57112918 | C | 0.00342 |
| rs12680392 | 8 | 57377050 | G | 0.00156 |
| rs2609996  | 8 | 57523675 | G | 0.00761 |
| rs1364956  | 8 | 57738405 | A | 0.01615 |
| rs11989947 | 8 | 57926689 | G | 0.00185 |
| rs1442125  | 8 | 58198812 | A | 0.00588 |
| rs16921695 | 8 | 58220209 | C | 0.00732 |
| rs10958532 | 8 | 58244139 | G | 0.01285 |
| rs6994658  | 8 | 58246609 | G | 0.01214 |
| rs17194487 | 8 | 58267466 | T | 0.00074 |
| rs6982990  | 8 | 58277829 | C | 0.00888 |
| rs17804870 | 8 | 58320625 | G | 0.00149 |
| rs17805110 | 8 | 58323993 | C | 0.01212 |
| rs17805326 | 8 | 58332087 | C | 0.00568 |
| rs17805332 | 8 | 58332352 | G | 0.01037 |
| rs2117890  | 8 | 58925608 | T | 0.01184 |
| rs10504242 | 8 | 59148749 | C | 0.00593 |
| rs13277801 | 8 | 59516088 | T | 0.01203 |
| rs6985620  | 8 | 59532713 | G | 0.00950 |
| rs2726561  | 8 | 59821230 | T | 0.00192 |
| rs13251536 | 8 | 59921972 | C | 0.00215 |
| rs2168409  | 8 | 60040787 | T | 0.00541 |
| rs3110142  | 8 | 60204564 | G | 0.00991 |
| rs4607595  | 8 | 60964005 | A | 0.01170 |
| rs7819235  | 8 | 60994310 | T | 0.01593 |
| rs6985045  | 8 | 61009822 | G | 0.00786 |
| rs16926068 | 8 | 61436766 | C | 0.00129 |
| rs10088453 | 8 | 62499008 | T | 0.00373 |
| rs7840865  | 8 | 62991951 | G | 0.00568 |
| rs1864731  | 8 | 62994726 | G | 0.00370 |
| rs7842255  | 8 | 63000615 | T | 0.01447 |
| rs16928166 | 8 | 63084209 | C | 0.00915 |
| rs16928311 | 8 | 63113409 | C | 0.00923 |
| rs16928335 | 8 | 63116802 | C | 0.01607 |
| rs6990341  | 8 | 63170923 | A | 0.00867 |
| rs1545786  | 8 | 63796569 | G | 0.00637 |
| rs12542042 | 8 | 63919059 | G | 0.01327 |
| rs6987149  | 8 | 63990420 | A | 0.00059 |

|            |   |          |   |         |
|------------|---|----------|---|---------|
| rs10103710 | 8 | 64469966 | T | 0.00258 |
| rs13254221 | 8 | 64979657 | A | 0.01311 |
| rs17291458 | 8 | 65059841 | C | 0.01564 |
| rs11777025 | 8 | 66626227 | C | 0.01492 |
| rs11781358 | 8 | 66632480 | A | 0.00056 |
| rs14213    | 8 | 66677508 | C | 0.00639 |
| rs1053088  | 8 | 66678337 | A | 0.01588 |
| rs7831234  | 8 | 67214949 | A | 0.00454 |
| rs9694082  | 8 | 67229334 | G | 0.01597 |
| rs7822243  | 8 | 67231942 | A | 0.00421 |
| rs6999100  | 8 | 67245286 | A | 0.00191 |
| rs1544986  | 8 | 68407143 | G | 0.01013 |
| rs7829537  | 8 | 68465081 | T | 0.01414 |
| rs2114051  | 8 | 68754736 | C | 0.01065 |
| rs6472330  | 8 | 68762513 | C | 0.00326 |
| rs2380427  | 8 | 68770846 | C | 0.01357 |
| rs2553651  | 8 | 68777945 | C | 0.01256 |
| rs2217028  | 8 | 68779823 | C | 0.01595 |
| rs6472342  | 8 | 68933224 | A | 0.01626 |
| rs4428658  | 8 | 69015870 | T | 0.00886 |
| rs6999098  | 8 | 69072314 | A | 0.00890 |
| rs10097733 | 8 | 69176372 | A | 0.01320 |
| rs1914328  | 8 | 69450724 | A | 0.00571 |
| rs16934546 | 8 | 69463495 | C | 0.00346 |
| rs2953964  | 8 | 69926501 | C | 0.00194 |
| rs13273088 | 8 | 70656528 | G | 0.00180 |
| rs17720343 | 8 | 70672343 | A | 0.00524 |
| rs16936279 | 8 | 70747363 | T | 0.00990 |
| rs10089971 | 8 | 70815403 | C | 0.01169 |
| rs4074358  | 8 | 71208965 | G | 0.00205 |
| rs10504469 | 8 | 71251571 | G | 0.00009 |
| rs13277972 | 8 | 72188089 | G | 0.00793 |
| rs16937408 | 8 | 72206677 | A | 0.01477 |
| rs7843772  | 8 | 72224650 | C | 0.01536 |
| rs3763548  | 8 | 72602437 | T | 0.00054 |
| rs10283255 | 8 | 72782372 | A | 0.00987 |
| rs7000490  | 8 | 73202985 | G | 0.01154 |
| rs16938055 | 8 | 73210302 | A | 0.01365 |
| rs10504532 | 8 | 73215633 | T | 0.01664 |
| rs4574889  | 8 | 73228899 | A | 0.01385 |
| rs4363243  | 8 | 73230236 | T | 0.00385 |
| rs13253101 | 8 | 73705254 | A | 0.00295 |
| rs2246785  | 8 | 73742670 | T | 0.00393 |
| rs1965805  | 8 | 73818016 | A | 0.00150 |

|            |   |          |   |         |
|------------|---|----------|---|---------|
| rs10808790 | 8 | 73932263 | T | 0.00656 |
| rs11992054 | 8 | 74189026 | T | 0.00116 |
| rs12541216 | 8 | 75037912 | G | 0.01261 |
| rs10504552 | 8 | 75038119 | A | 0.00638 |
| rs6987422  | 8 | 75189439 | A | 0.00958 |
| rs41421651 | 8 | 75199459 | G | 0.00642 |
| rs2912302  | 8 | 75221845 | T | 0.01424 |
| rs1875064  | 8 | 75238861 | A | 0.00462 |
| rs2977056  | 8 | 75247824 | G | 0.01203 |
| rs2936680  | 8 | 75251256 | G | 0.01599 |
| rs10957702 | 8 | 75306307 | T | 0.00640 |
| rs2977046  | 8 | 75342192 | C | 0.01619 |
| rs269173   | 8 | 75799475 | A | 0.00122 |
| rs16939078 | 8 | 76554139 | A | 0.00159 |
| rs10464917 | 8 | 76809591 | A | 0.00398 |
| rs12543819 | 8 | 77072706 | T | 0.00998 |
| rs863813   | 8 | 77088796 | A | 0.01152 |
| rs830435   | 8 | 77100509 | A | 0.00957 |
| rs1821018  | 8 | 77316621 | G | 0.00611 |
| rs2626349  | 8 | 77919190 | G | 0.00116 |
| rs6982916  | 8 | 79134917 | A | 0.01206 |
| rs7357405  | 8 | 79183255 | A | 0.00720 |
| rs7007747  | 8 | 79375373 | C | 0.01078 |
| rs2169149  | 8 | 80381470 | T | 0.01472 |
| rs1460162  | 8 | 80389955 | C | 0.01612 |
| rs1460163  | 8 | 80390003 | T | 0.00463 |
| rs2461033  | 8 | 80758594 | C | 0.00467 |
| rs16907075 | 8 | 80762352 | T | 0.00795 |
| rs11991941 | 8 | 81198733 | G | 0.01087 |
| rs16907708 | 8 | 81509974 | T | 0.00874 |
| rs11785691 | 8 | 81673176 | T | 0.00908 |
| rs7835909  | 8 | 82436290 | C | 0.01131 |
| rs17720586 | 8 | 83431838 | C | 0.00090 |
| rs7825517  | 8 | 84120546 | G | 0.00129 |
| rs7829784  | 8 | 84276448 | A | 0.00609 |
| rs2090880  | 8 | 84277905 | A | 0.01277 |
| rs7007038  | 8 | 84675888 | T | 0.01636 |
| rs16912406 | 8 | 85088628 | C | 0.01399 |
| rs1365400  | 8 | 87083604 | G | 0.00536 |
| rs7842410  | 8 | 87764021 | G | 0.00759 |
| rs1458132  | 8 | 87835529 | T | 0.01475 |
| rs4639531  | 8 | 87858448 | C | 0.01402 |
| rs6468519  | 8 | 87953076 | C | 0.00776 |
| rs10955093 | 8 | 87974367 | G | 0.01293 |

|            |   |           |   |         |
|------------|---|-----------|---|---------|
| rs6468774  | 8 | 88419225  | A | 0.00603 |
| rs7840637  | 8 | 88872232  | A | 0.00882 |
| rs7824648  | 8 | 88880870  | A | 0.00928 |
| rs7839686  | 8 | 88994844  | G | 0.00335 |
| rs17717629 | 8 | 88999778  | C | 0.00732 |
| rs278886   | 8 | 89061906  | T | 0.01014 |
| rs10504848 | 8 | 89286855  | G | 0.00380 |
| rs17674293 | 8 | 89843560  | A | 0.00849 |
| rs1487799  | 8 | 89971877  | A | 0.00893 |
| rs7833317  | 8 | 90345058  | A | 0.00837 |
| rs13312971 | 8 | 91018273  | C | 0.01450 |
| rs10109454 | 8 | 91030688  | T | 0.00642 |
| rs717873   | 8 | 91089589  | G | 0.00087 |
| rs4735368  | 8 | 91853110  | G | 0.00739 |
| rs4373488  | 8 | 92147433  | G | 0.01427 |
| rs12678829 | 8 | 93644469  | C | 0.00892 |
| rs278559   | 8 | 94324446  | C | 0.00483 |
| rs1431564  | 8 | 94439637  | T | 0.01278 |
| rs11781676 | 8 | 94761703  | A | 0.00398 |
| rs7009086  | 8 | 95932077  | A | 0.00928 |
| rs16917102 | 8 | 95948211  | A | 0.01165 |
| rs10086284 | 8 | 96056103  | C | 0.00448 |
| rs297571   | 8 | 96252193  | G | 0.01239 |
| rs17668689 | 8 | 96254526  | G | 0.00363 |
| rs10956946 | 8 | 96401029  | T | 0.00335 |
| rs3133762  | 8 | 96521815  | G | 0.01299 |
| rs3104964  | 8 | 96664912  | C | 0.00433 |
| rs6471550  | 8 | 96714775  | G | 0.00597 |
| rs10103791 | 8 | 96828102  | G | 0.00553 |
| rs11775669 | 8 | 96924457  | A | 0.00657 |
| rs7465172  | 8 | 96940980  | T | 0.00647 |
| rs920200   | 8 | 96971052  | C | 0.00311 |
| rs2874040  | 8 | 97393019  | T | 0.01377 |
| rs6985568  | 8 | 97591763  | T | 0.00562 |
| rs16894717 | 8 | 97628841  | G | 0.01553 |
| rs7812565  | 8 | 97791047  | A | 0.01350 |
| rs2053480  | 8 | 98348127  | A | 0.00304 |
| rs1835744  | 8 | 98351602  | G | 0.00112 |
| rs7816982  | 8 | 98364236  | C | 0.01463 |
| rs4368946  | 8 | 98497864  | T | 0.01222 |
| rs2512423  | 8 | 98691409  | G | 0.01359 |
| rs2512424  | 8 | 98691491  | A | 0.00879 |
| rs10504980 | 8 | 98918085  | A | 0.00430 |
| rs1460930  | 8 | 101183970 | T | 0.01639 |

|            |   |           |   |         |
|------------|---|-----------|---|---------|
| rs16898310 | 8 | 101469479 | C | 0.00657 |
| rs7842290  | 8 | 101501220 | G | 0.00918 |
| rs7004548  | 8 | 101707344 | C | 0.00116 |
| rs17365948 | 8 | 102026053 | G | 0.00719 |
| rs6997824  | 8 | 102195896 | A | 0.00716 |
| rs1431008  | 8 | 102351297 | T | 0.01508 |
| rs16867595 | 8 | 102468210 | T | 0.00104 |
| rs678347   | 8 | 102532778 | A | 0.00210 |
| rs10087735 | 8 | 102719877 | A | 0.00900 |
| rs1269695  | 8 | 103140229 | T | 0.00033 |
| rs998200   | 8 | 103635402 | G | 0.01078 |
| rs2436896  | 8 | 103636875 | A | 0.00348 |
| rs2248178  | 8 | 103638274 | A | 0.01499 |
| rs2248172  | 8 | 103638355 | C | 0.01349 |
| rs10955290 | 8 | 103823287 | C | 0.01423 |
| rs17790247 | 8 | 104148224 | A | 0.00199 |
| rs2575700  | 8 | 104436849 | A | 0.00156 |
| rs7001645  | 8 | 105192526 | C | 0.00369 |
| rs17821383 | 8 | 105361774 | T | 0.00746 |
| rs921110   | 8 | 105387143 | C | 0.00108 |
| rs11784380 | 8 | 106062241 | T | 0.00133 |
| rs3101274  | 8 | 106121519 | C | 0.00084 |
| rs6983273  | 8 | 106257703 | G | 0.00040 |
| rs1349318  | 8 | 106625669 | C | 0.01292 |
| rs1348262  | 8 | 106754469 | T | 0.00607 |
| rs4734135  | 8 | 107328412 | T | 0.00242 |
| rs11785730 | 8 | 108855023 | G | 0.01095 |
| rs10090705 | 8 | 109701721 | T | 0.00464 |
| rs904174   | 8 | 109754362 | A | 0.01489 |
| rs904175   | 8 | 109756487 | A | 0.01501 |
| rs3019417  | 8 | 109769766 | C | 0.01203 |
| rs4735075  | 8 | 109775285 | T | 0.00475 |
| rs897838   | 8 | 110495783 | G | 0.00440 |
| rs2703388  | 8 | 110651938 | C | 0.01213 |
| rs2844235  | 8 | 110663324 | A | 0.00530 |
| rs16879807 | 8 | 110693029 | A | 0.01456 |
| rs16880052 | 8 | 110884232 | C | 0.00230 |
| rs7832016  | 8 | 110983650 | G | 0.00851 |
| rs4734218  | 8 | 111092599 | T | 0.00228 |
| rs13272142 | 8 | 111243309 | T | 0.00502 |
| rs2350728  | 8 | 111253247 | C | 0.01060 |
| rs11785408 | 8 | 111988767 | C | 0.00788 |
| rs7388152  | 8 | 112011935 | T | 0.00144 |
| rs1427181  | 8 | 112260608 | C | 0.00991 |

|            |   |           |   |         |
|------------|---|-----------|---|---------|
| rs4876700  | 8 | 112625740 | C | 0.00697 |
| rs9297452  | 8 | 112812615 | G | 0.01423 |
| rs6469379  | 8 | 112845541 | C | 0.00684 |
| rs1397367  | 8 | 112898378 | A | 0.00049 |
| rs17559706 | 8 | 113473315 | C | 0.01149 |
| rs13262072 | 8 | 114002277 | T | 0.01482 |
| rs35653877 | 8 | 114194009 | T | 0.00916 |
| rs2357037  | 8 | 114933324 | A | 0.01470 |
| rs2175484  | 8 | 115076571 | A | 0.01182 |
| rs7014060  | 8 | 115543934 | G | 0.01167 |
| rs4242563  | 8 | 115919514 | C | 0.00288 |
| rs7016452  | 8 | 116052379 | A | 0.01367 |
| rs6992591  | 8 | 116437619 | G | 0.01197 |
| rs3808409  | 8 | 116521516 | C | 0.00200 |
| rs2272619  | 8 | 116666214 | A | 8.71600 |
| rs10106532 | 8 | 116880520 | G | 0.01385 |
| rs6997203  | 8 | 117576668 | A | 0.00951 |
| rs11775732 | 8 | 117579310 | G | 0.00581 |
| rs12682047 | 8 | 117986808 | C | 0.00684 |
| rs6987643  | 8 | 118097727 | A | 0.01635 |
| rs6998550  | 8 | 118363321 | C | 0.00445 |
| rs4604472  | 8 | 118740648 | C | 0.00828 |
| rs1508566  | 8 | 118770631 | A | 0.00662 |
| rs3115767  | 8 | 118821701 | A | 0.01129 |
| rs1379329  | 8 | 119235213 | T | 0.00117 |
| rs3802185  | 8 | 119395223 | G | 0.00324 |
| rs2326434  | 8 | 121116979 | C | 0.01023 |
| rs11787250 | 8 | 121166477 | C | 0.00872 |
| rs4634688  | 8 | 121330818 | T | 0.00873 |
| rs4585781  | 8 | 121898100 | C | 0.00078 |
| rs2656112  | 8 | 122335651 | A | 0.00427 |
| rs1386442  | 8 | 122507370 | C | 0.00459 |
| rs16895544 | 8 | 122582974 | G | 0.01140 |
| rs1542683  | 8 | 122585726 | G | 0.01224 |
| rs2385922  | 8 | 122592919 | G | 0.01500 |
| rs6998348  | 8 | 122706022 | T | 0.00320 |
| rs11781643 | 8 | 123498651 | A | 0.00756 |
| rs6993726  | 8 | 123513831 | T | 0.01498 |
| rs1523214  | 8 | 123725422 | A | 0.00471 |
| rs2384844  | 8 | 123875421 | T | 0.01499 |
| rs10956116 | 8 | 124183514 | G | 0.01076 |
| rs17378130 | 8 | 124310523 | G | 0.00748 |
| rs16898637 | 8 | 124710187 | G | 0.01161 |
| rs12545556 | 8 | 124715203 | T | 0.00615 |



|            |   |           |   |         |
|------------|---|-----------|---|---------|
| rs11777302 | 8 | 124719608 | T | 0.00523 |
| rs13261694 | 8 | 124722976 | A | 0.01463 |
| rs4374971  | 8 | 124735468 | A | 0.01263 |
| rs6470170  | 8 | 124736503 | A | 0.01034 |
| rs1073178  | 8 | 125155212 | A | 0.00135 |
| rs16899480 | 8 | 125337303 | T | 0.01599 |
| rs17296667 | 8 | 125366053 | G | 0.01633 |
| rs4007936  | 8 | 125723535 | A | 0.00851 |
| rs891540   | 8 | 125811489 | T | 0.00898 |
| rs6989594  | 8 | 126373049 | G | 0.01063 |
| rs10110319 | 8 | 127448989 | A | 0.00739 |
| rs12679253 | 8 | 127654555 | A | 0.00797 |
| rs2029425  | 8 | 127841380 | A | 0.01062 |
| rs4871004  | 8 | 128051271 | A | 0.01124 |
| rs2392683  | 8 | 128055648 | C | 0.00395 |
| rs710885   | 8 | 128095310 | C | 0.00768 |
| rs10505483 | 8 | 128194377 | T | 0.01176 |
| rs7357486  | 8 | 128510805 | C | 0.00950 |
| rs7835137  | 8 | 128744953 | T | 0.00894 |
| rs7829132  | 8 | 128902659 | C | 0.00464 |
| rs4733792  | 8 | 128909458 | A | 0.01367 |
| rs4733797  | 8 | 128913644 | C | 0.01521 |
| rs4332094  | 8 | 128926090 | T | 0.01602 |
| rs13259137 | 8 | 128927871 | G | 0.01576 |
| rs2648880  | 8 | 129143281 | A | 0.01545 |
| rs4472475  | 8 | 130291217 | T | 0.01620 |
| rs4733687  | 8 | 130321411 | A | 0.01214 |
| rs4733695  | 8 | 130362958 | G | 0.00271 |
| rs4480081  | 8 | 130368674 | G | 0.00201 |
| rs2099292  | 8 | 130427095 | C | 0.00640 |
| rs11990588 | 8 | 130444986 | T | 0.00889 |
| rs2724831  | 8 | 130898219 | G | 0.01551 |
| rs7463074  | 8 | 131640779 | A | 0.00112 |
| rs12549037 | 8 | 131687094 | G | 0.01276 |
| rs17312795 | 8 | 131739875 | C | 0.00019 |
| rs1876882  | 8 | 131814746 | C | 0.00681 |
| rs10956569 | 8 | 132068198 | C | 0.00851 |
| rs7010302  | 8 | 132615532 | G | 0.01490 |
| rs16904487 | 8 | 132723332 | G | 0.01103 |
| rs11994131 | 8 | 132937403 | C | 0.00308 |
| rs10505586 | 8 | 133191683 | T | 0.00092 |
| rs10505587 | 8 | 133197355 | T | 0.00595 |
| rs2436140  | 8 | 133224443 | G | 0.00375 |
| rs16904805 | 8 | 134101611 | T | 0.00764 |

|            |   |           |   |         |
|------------|---|-----------|---|---------|
| rs1133076  | 8 | 134194864 | G | 0.00966 |
| rs2294025  | 8 | 134214694 | T | 0.01424 |
| rs3739262  | 8 | 134274895 | T | 0.00397 |
| rs1060401  | 8 | 134339485 | T | 0.01354 |
| rs4736679  | 8 | 134569094 | A | 0.00440 |
| rs2978015  | 8 | 134609061 | G | 0.00759 |
| rs2978023  | 8 | 134617753 | G | 0.00015 |
| rs1518892  | 8 | 134679989 | C | 0.00529 |
| rs4736702  | 8 | 134684911 | G | 0.01505 |
| rs7003789  | 8 | 135434578 | G | 0.00317 |
| rs11989849 | 8 | 135606356 | C | 0.00365 |
| rs4909801  | 8 | 135948341 | A | 0.00701 |
| rs12386815 | 8 | 136027851 | G | 0.01559 |
| rs16905306 | 8 | 136307175 | A | 0.01504 |
| rs4130250  | 8 | 136956284 | G | 0.00438 |
| rs6997347  | 8 | 136994256 | T | 0.01201 |
| rs1868368  | 8 | 137082629 | T | 0.01171 |
| rs10505642 | 8 | 137092988 | G | 0.00141 |
| rs6994909  | 8 | 137094522 | A | 0.00638 |
| rs4909537  | 8 | 137094596 | A | 0.00144 |
| rs6577701  | 8 | 137105435 | C | 0.00440 |
| rs13266231 | 8 | 137113539 | C | 0.01547 |
| rs13281271 | 8 | 137352177 | T | 0.00955 |
| rs305332   | 8 | 137707391 | A | 0.01574 |
| rs17646599 | 8 | 137757137 | G | 0.01137 |
| rs6985864  | 8 | 138084920 | G | 0.00017 |
| rs4256627  | 8 | 138167112 | C | 0.00579 |
| rs4909356  | 8 | 138289997 | T | 0.00314 |
| rs6577766  | 8 | 138347037 | C | 0.00284 |
| rs17624373 | 8 | 138381466 | T | 0.00724 |
| rs28483233 | 8 | 138673785 | G | 9.32700 |
| rs6577810  | 8 | 138682350 | A | 0.01521 |
| rs4489355  | 8 | 138684814 | C | 0.01447 |
| rs2705304  | 8 | 138983556 | G | 0.01394 |
| rs2705295  | 8 | 138987482 | G | 0.00928 |
| rs2705291  | 8 | 138988883 | G | 0.01165 |
| rs2705285  | 8 | 139012095 | G | 0.00001 |
| rs2668129  | 8 | 139034394 | C | 0.01530 |
| rs17651762 | 8 | 139050457 | T | 0.00123 |
| rs2318334  | 8 | 139859320 | T | 0.00150 |
| rs12114311 | 8 | 139940650 | A | 0.00762 |
| rs11166850 | 8 | 139943056 | G | 0.01067 |
| rs2318342  | 8 | 139966338 | T | 0.00604 |
| rs4074554  | 8 | 140232633 | T | 0.00864 |

|            |   |           |   |         |
|------------|---|-----------|---|---------|
| rs6577996  | 8 | 140236061 | G | 0.01155 |
| rs11166882 | 8 | 140237822 | A | 0.01275 |
| rs6578008  | 8 | 140272967 | T | 0.00632 |
| rs2468663  | 8 | 140538976 | C | 0.01664 |
| rs2431300  | 8 | 140680936 | A | 0.01146 |
| rs6578039  | 8 | 140757662 | T | 0.00617 |
| rs883613   | 8 | 141145379 | A | 0.00606 |
| rs9987138  | 8 | 141145805 | G | 0.01283 |
| rs6983924  | 8 | 141669401 | G | 0.01406 |
| rs938726   | 8 | 141680246 | A | 0.01540 |
| rs4961226  | 8 | 141711737 | A | 0.01366 |
| rs6987810  | 8 | 141712113 | G | 0.01362 |
| rs7001673  | 8 | 142267778 | G | 0.01375 |
| rs6578164  | 8 | 142428444 | G | 0.00685 |
| rs11990111 | 8 | 142778888 | G | 0.01052 |
| rs13262940 | 8 | 143656311 | T | 0.00509 |
| rs7844961  | 8 | 143999186 | A | 0.01257 |
| rs7831617  | 8 | 143999285 | T | 0.00042 |
| rs7846671  | 8 | 144255341 | C | 0.00996 |
| rs2722469  | 8 | 145926351 | C | 0.00585 |
| rs10971413 | 9 | 331063    | C | 0.01648 |
| rs10491598 | 9 | 582889    | A | 0.00928 |
| rs1323269  | 9 | 780234    | C | 0.00793 |
| rs10115078 | 9 | 792053    | C | 0.00333 |
| rs16924470 | 9 | 813064    | T | 0.00086 |
| rs279874   | 9 | 943057    | C | 0.00620 |
| rs7043337  | 9 | 1061814   | G | 0.00193 |
| rs1876752  | 9 | 1063114   | C | 0.01234 |
| rs10733226 | 9 | 1114027   | G | 0.00487 |
| rs4740516  | 9 | 1211290   | G | 0.00246 |
| rs4741218  | 9 | 1233842   | C | 0.01307 |
| rs10114766 | 9 | 1294068   | G | 0.00849 |
| rs945663   | 9 | 1668482   | A | 0.00731 |
| rs10962856 | 9 | 1707031   | C | 0.00887 |
| rs10962859 | 9 | 1707158   | A | 0.00498 |
| rs1904091  | 9 | 1715917   | A | 0.00957 |
| rs17724855 | 9 | 1862957   | A | 0.00087 |
| rs1890587  | 9 | 1968127   | G | 0.00674 |
| rs3765580  | 9 | 2067888   | C | 0.01566 |
| rs10964908 | 9 | 2119832   | C | 0.00763 |
| rs3887339  | 9 | 2204428   | G | 0.01185 |
| rs2210398  | 9 | 2333547   | G | 0.01203 |
| rs871786   | 9 | 2351176   | T | 0.00581 |
| rs1020652  | 9 | 2667012   | T | 0.00005 |

|            |   |         |   |         |
|------------|---|---------|---|---------|
| rs12345926 | 9 | 2920875 | T | 0.01315 |
| rs1501586  | 9 | 2931418 | A | 0.00496 |
| rs7045640  | 9 | 2968377 | C | 0.00975 |
| rs3858038  | 9 | 2978280 | C | 0.00489 |
| rs7027328  | 9 | 3733730 | A | 0.00387 |
| rs4570215  | 9 | 4050625 | G | 0.00356 |
| rs7028492  | 9 | 4070755 | G | 0.00738 |
| rs806051   | 9 | 4109707 | G | 0.01504 |
| rs529420   | 9 | 4117906 | A | 0.00161 |
| rs2068911  | 9 | 4195498 | A | 0.00953 |
| rs911488   | 9 | 4207773 | T | 0.00409 |
| rs3895473  | 9 | 4319209 | G | 0.00224 |
| rs457287   | 9 | 4824394 | A | 0.00901 |
| rs10974805 | 9 | 4824420 | T | 0.01099 |
| rs461130   | 9 | 4824597 | C | 0.01249 |
| rs10815160 | 9 | 5106616 | C | 0.00279 |
| rs911735   | 9 | 5352762 | C | 0.00957 |
| rs10815213 | 9 | 5408191 | G | 0.00516 |
| rs702275   | 9 | 5436388 | T | 0.01176 |
| rs10975519 | 9 | 6243571 | A | 0.01592 |
| rs7047921  | 9 | 6245319 | A | 7.77900 |
| rs2039386  | 9 | 6258204 | G | 0.00656 |
| rs10758783 | 9 | 6397799 | T | 0.01370 |
| rs10758790 | 9 | 6421946 | T | 0.00865 |
| rs1759402  | 9 | 6670477 | A | 0.00501 |
| rs17501756 | 9 | 6674955 | G | 0.00631 |
| rs6477134  | 9 | 6964101 | C | 0.01311 |
| rs1570507  | 9 | 6964900 | C | 0.00312 |
| rs10491778 | 9 | 6967233 | G | 0.01341 |
| rs1323410  | 9 | 6968691 | T | 0.00681 |
| rs7019027  | 9 | 7041826 | C | 0.00788 |
| rs4740869  | 9 | 7062065 | A | 0.00560 |
| rs4742409  | 9 | 7764180 | T | 0.01015 |
| rs1853252  | 9 | 7850012 | T | 0.00286 |
| rs10976785 | 9 | 8109666 | A | 0.01303 |
| rs10815767 | 9 | 8121675 | A | 0.00555 |
| rs11787770 | 9 | 8132694 | T | 0.00592 |
| rs10976918 | 9 | 8279350 | G | 0.01043 |
| rs12235247 | 9 | 8292233 | G | 0.01425 |
| rs16927547 | 9 | 8322307 | C | 0.00494 |
| rs1909755  | 9 | 8377055 | C | 0.00392 |
| rs2296101  | 9 | 8479006 | T | 0.00821 |
| rs7023351  | 9 | 8568551 | C | 0.00099 |
| rs17573565 | 9 | 8594583 | C | 0.00865 |

|            |   |          |   |         |
|------------|---|----------|---|---------|
| rs1512380  | 9 | 8625791  | C | 0.01030 |
| rs16928238 | 9 | 8636183  | G | 0.01526 |
| rs7032107  | 9 | 8785072  | G | 0.00875 |
| rs1434254  | 9 | 8816278  | A | 0.01004 |
| rs10759011 | 9 | 8863732  | G | 0.01539 |
| rs10739174 | 9 | 8863866  | T | 0.00409 |
| rs10511516 | 9 | 8972308  | T | 0.01377 |
| rs1332806  | 9 | 9345896  | C | 0.00821 |
| rs10977739 | 9 | 9414519  | G | 0.01288 |
| rs17767692 | 9 | 9423671  | C | 0.01105 |
| rs10977785 | 9 | 9455775  | C | 0.01219 |
| rs10977801 | 9 | 9465644  | C | 0.00150 |
| rs1332199  | 9 | 9493477  | T | 0.01086 |
| rs7046780  | 9 | 9592389  | G | 0.00100 |
| rs10978034 | 9 | 9839056  | G | 0.00473 |
| rs6477431  | 9 | 9962241  | A | 0.00889 |
| rs10958891 | 9 | 10114871 | G | 0.00174 |
| rs10959841 | 9 | 11459190 | T | 0.00924 |
| rs10491950 | 9 | 11481500 | G | 0.00626 |
| rs10756267 | 9 | 11701459 | T | 0.00229 |
| rs791681   | 9 | 12512037 | C | 0.01106 |
| rs10465043 | 9 | 12950607 | G | 6.15400 |
| rs1413359  | 9 | 13520487 | A | 0.00726 |
| rs10810007 | 9 | 13709314 | T | 0.00832 |
| rs7848012  | 9 | 14002182 | C | 0.00339 |
| rs4741394  | 9 | 14527386 | T | 0.01238 |
| rs10961747 | 9 | 14826633 | T | 0.00792 |
| rs504822   | 9 | 15232896 | A | 0.01213 |
| rs10511610 | 9 | 15262462 | G | 0.00740 |
| rs7847144  | 9 | 15704658 | T | 0.01629 |
| rs6474954  | 9 | 15704811 | C | 0.00917 |
| rs4146291  | 9 | 15773266 | T | 0.00838 |
| rs770193   | 9 | 15852959 | G | 0.00215 |
| rs10810502 | 9 | 15942197 | T | 0.00532 |
| rs1887665  | 9 | 15994012 | C | 0.01214 |
| rs11795150 | 9 | 16095961 | A | 0.00887 |
| rs16934205 | 9 | 16185381 | T | 0.01011 |
| rs12005826 | 9 | 16186674 | T | 0.00412 |
| rs12004216 | 9 | 16211742 | C | 0.00055 |
| rs10756757 | 9 | 16509926 | C | 0.00634 |
| rs10756762 | 9 | 16553123 | A | 0.00997 |
| rs10810581 | 9 | 16635894 | T | 0.00999 |
| rs1888207  | 9 | 16686187 | G | 0.00196 |
| rs10738446 | 9 | 16686510 | C | 0.00040 |

|            |   |          |   |          |
|------------|---|----------|---|----------|
| rs2297176  | 9 | 16696012 | C | 0.01527  |
| rs1856132  | 9 | 16720653 | C | 0.01604  |
| rs9987413  | 9 | 16740348 | T | 0.00650  |
| rs2254330  | 9 | 16792973 | G | 0.00132  |
| rs12351269 | 9 | 16796521 | G | 0.01231  |
| rs3935374  | 9 | 16816766 | T | 0.00049  |
| rs263655   | 9 | 16999481 | A | 0.01573  |
| rs411167   | 9 | 17120360 | C | 0.01271  |
| rs6475141  | 9 | 17340378 | G | 0.01134  |
| rs17547685 | 9 | 17622364 | C | 16.62400 |
| rs6475188  | 9 | 17868407 | G | 0.00239  |
| rs10963347 | 9 | 17926235 | G | 0.00326  |
| rs10963360 | 9 | 17946618 | G | 0.00151  |
| rs16936157 | 9 | 17955723 | A | 0.01318  |
| rs7047163  | 9 | 18772512 | A | 0.00268  |
| rs10156461 | 9 | 18808890 | C | 0.01432  |
| rs7039188  | 9 | 18823014 | C | 0.00605  |
| rs17233198 | 9 | 18823053 | T | 0.00404  |
| rs7862903  | 9 | 18852658 | C | 0.01490  |
| rs6475295  | 9 | 18964072 | T | 0.01453  |
| rs10963974 | 9 | 19120611 | G | 0.01542  |
| rs4977499  | 9 | 19135435 | A | 0.00097  |
| rs7046518  | 9 | 19409446 | G | 0.00527  |
| rs4571814  | 9 | 20484511 | G | 0.01017  |
| rs10964641 | 9 | 20631087 | C | 0.01470  |
| rs17685984 | 9 | 20776691 | G | 0.01394  |
| rs10811525 | 9 | 21278176 | A | 0.00763  |
| rs16938527 | 9 | 21663608 | T | 0.00056  |
| rs2383213  | 9 | 22231415 | A | 0.00104  |
| rs647549   | 9 | 22699756 | T | 0.00697  |
| rs555828   | 9 | 22723238 | T | 0.00855  |
| rs10811780 | 9 | 22841021 | T | 0.00310  |
| rs1536856  | 9 | 24228655 | A | 0.01182  |
| rs7039851  | 9 | 24389969 | G | 0.01538  |
| rs7849050  | 9 | 24740179 | C | 0.01532  |
| rs10757485 | 9 | 24762803 | G | 0.00018  |
| rs12686755 | 9 | 24895439 | A | 0.00251  |
| rs7025783  | 9 | 24933729 | C | 0.00378  |
| rs10114899 | 9 | 24949557 | G | 0.00066  |
| rs4507853  | 9 | 24991219 | A | 0.00805  |
| rs7038072  | 9 | 25316440 | C | 0.01548  |
| rs10966868 | 9 | 25332777 | G | 0.00414  |
| rs1220071  | 9 | 25805074 | C | 0.00002  |
| rs7022624  | 9 | 25971645 | C | 0.00113  |

|            |   |          |   |         |
|------------|---|----------|---|---------|
| rs10115168 | 9 | 26696278 | T | 0.01231 |
| rs7866709  | 9 | 26714384 | A | 0.01471 |
| rs10967532 | 9 | 26768168 | G | 0.01183 |
| rs17755911 | 9 | 26874045 | G | 0.00613 |
| rs16911092 | 9 | 27132444 | G | 0.00565 |
| rs7855848  | 9 | 27143055 | A | 0.00609 |
| rs1107774  | 9 | 27154846 | A | 0.00474 |
| rs10967760 | 9 | 27172825 | A | 0.00657 |
| rs606342   | 9 | 27187673 | C | 0.00633 |
| rs638203   | 9 | 27193134 | A | 0.00300 |
| rs10967795 | 9 | 27224132 | G | 0.00848 |
| rs1885379  | 9 | 27262426 | T | 0.01155 |
| rs10967865 | 9 | 27284815 | A | 0.00572 |
| rs4483251  | 9 | 27361123 | G | 0.00364 |
| rs4258086  | 9 | 27381266 | G | 0.00724 |
| rs1821432  | 9 | 28987308 | A | 0.01195 |
| rs12003345 | 9 | 29030151 | G | 0.01321 |
| rs4355871  | 9 | 29643331 | G | 0.01477 |
| rs10969315 | 9 | 29654138 | G | 0.01647 |
| rs10969317 | 9 | 29661982 | C | 0.01008 |
| rs10969404 | 9 | 29827987 | G | 0.01004 |
| rs7871526  | 9 | 29893720 | G | 0.00482 |
| rs1633490  | 9 | 30084419 | T | 0.00290 |
| rs12350526 | 9 | 30247912 | C | 0.00087 |
| rs10969854 | 9 | 30743998 | A | 0.00810 |
| rs1115506  | 9 | 30815690 | T | 0.01387 |
| rs10758026 | 9 | 31143406 | T | 0.00593 |
| rs1414025  | 9 | 31154389 | C | 0.00875 |
| rs10970497 | 9 | 31701586 | G | 0.01563 |
| rs12550877 | 9 | 31702096 | T | 0.00783 |
| rs1999368  | 9 | 32236791 | A | 0.00078 |
| rs628425   | 9 | 32539602 | A | 0.01314 |
| rs12003093 | 9 | 32578258 | A | 0.01239 |
| rs1442288  | 9 | 32879102 | C | 0.01373 |
| rs11789863 | 9 | 33046378 | C | 0.01123 |
| rs10813950 | 9 | 33117640 | G | 0.00582 |
| rs10813951 | 9 | 33118021 | T | 0.01096 |
| rs10813957 | 9 | 33143527 | G | 0.01526 |
| rs10125115 | 9 | 34454433 | G | 0.01200 |
| rs2381162  | 9 | 34544060 | T | 0.00429 |
| rs2812344  | 9 | 34720015 | C | 0.00511 |
| rs10814234 | 9 | 35395543 | C | 0.01130 |
| rs7863401  | 9 | 35932406 | G | 0.00499 |
| rs7035468  | 9 | 36050451 | A | 0.01642 |

|            |   |          |   |         |
|------------|---|----------|---|---------|
| rs3824425  | 9 | 36479161 | G | 0.01366 |
| rs10758392 | 9 | 36720774 | T | 0.00129 |
| rs7043503  | 9 | 36724872 | G | 0.01431 |
| rs7043808  | 9 | 36724901 | G | 0.01306 |
| rs10738976 | 9 | 36726811 | A | 0.01257 |
| rs7025013  | 9 | 36787328 | G | 0.01250 |
| rs9298973  | 9 | 36878975 | T | 0.00478 |
| rs10814496 | 9 | 36965108 | A | 0.00414 |
| rs4880048  | 9 | 36979054 | G | 0.00186 |
| rs10125441 | 9 | 37537256 | T | 0.00686 |
| rs10121098 | 9 | 37687265 | G | 0.00173 |
| rs943935   | 9 | 38140167 | G | 0.00436 |
| rs2585667  | 9 | 38190215 | A | 0.01297 |
| rs2585668  | 9 | 38190670 | C | 0.00270 |
| rs7044431  | 9 | 38286213 | A | 0.00501 |
| rs7045549  | 9 | 38712442 | A | 0.00715 |
| rs4271029  | 9 | 70412250 | C | 0.00899 |
| rs10511963 | 9 | 70611179 | T | 0.00194 |
| rs17392931 | 9 | 70670116 | T | 0.01508 |
| rs10869690 | 9 | 70811507 | C | 0.00565 |
| rs17439752 | 9 | 71625533 | G | 0.00985 |
| rs10521434 | 9 | 71638815 | T | 0.01522 |
| rs10521437 | 9 | 71865359 | C | 8.16300 |
| rs7469513  | 9 | 72984279 | A | 0.01164 |
| rs10868968 | 9 | 72984412 | G | 0.00680 |
| rs11142716 | 9 | 72984608 | C | 0.00605 |
| rs6560186  | 9 | 72997021 | T | 0.01053 |
| rs10746864 | 9 | 73001077 | G | 0.00332 |
| rs2174306  | 9 | 73014929 | T | 0.00515 |
| rs1354458  | 9 | 73017626 | G | 0.01053 |
| rs12346443 | 9 | 73022306 | C | 0.01232 |
| rs11142756 | 9 | 73059780 | T | 0.01135 |
| rs11142802 | 9 | 73145664 | C | 0.00612 |
| rs10115877 | 9 | 73199363 | G | 0.00576 |
| rs7033424  | 9 | 73288654 | C | 0.01231 |
| rs7031344  | 9 | 73489262 | C | 0.01428 |
| rs3780610  | 9 | 73518742 | G | 0.00258 |
| rs12379790 | 9 | 73569079 | T | 0.00570 |
| rs4130866  | 9 | 74047938 | C | 0.00153 |
| rs1322479  | 9 | 74073145 | G | 0.00263 |
| rs7041300  | 9 | 74391174 | A | 0.01612 |
| rs348454   | 9 | 74743032 | A | 0.00557 |
| rs11143443 | 9 | 74845870 | G | 0.00343 |
| rs10114134 | 9 | 74993381 | T | 0.00057 |



|            |   |          |   |         |
|------------|---|----------|---|---------|
| rs11143600 | 9 | 75304877 | G | 0.00232 |
| rs1388362  | 9 | 75762609 | G | 0.01545 |
| rs11143894 | 9 | 76095170 | G | 0.00854 |
| rs3903529  | 9 | 76454048 | T | 0.00024 |
| rs4545164  | 9 | 77038315 | A | 0.00455 |
| rs10869631 | 9 | 77484665 | A | 0.00848 |
| rs11144637 | 9 | 77630293 | A | 0.01449 |
| rs7031123  | 9 | 77646521 | C | 0.01448 |
| rs10521469 | 9 | 78074149 | G | 0.00798 |
| rs2803413  | 9 | 78092971 | T | 0.00244 |
| rs2643318  | 9 | 78147391 | T | 0.00102 |
| rs2149589  | 9 | 78390894 | A | 0.01231 |
| rs10521475 | 9 | 78457692 | A | 0.00575 |
| rs2042612  | 9 | 78564595 | T | 0.00084 |
| rs10119901 | 9 | 78576969 | C | 0.01270 |
| rs7852521  | 9 | 78766008 | C | 0.01605 |
| rs7856464  | 9 | 78766827 | C | 0.00600 |
| rs17423029 | 9 | 79084832 | A | 0.00657 |
| rs11145439 | 9 | 79300769 | T | 0.01657 |
| rs17063760 | 9 | 79377780 | C | 0.00095 |
| rs2047995  | 9 | 80359770 | T | 0.01012 |
| rs1105791  | 9 | 80369137 | C | 0.01338 |
| rs273431   | 9 | 81056812 | C | 0.01414 |
| rs10867359 | 9 | 81120514 | G | 0.00780 |
| rs13298282 | 9 | 81236271 | C | 0.00418 |
| rs10491787 | 9 | 81264935 | T | 0.01522 |
| rs11138241 | 9 | 81266285 | G | 0.00266 |
| rs17427625 | 9 | 81267705 | G | 0.01651 |
| rs10491791 | 9 | 81286014 | G | 0.01215 |
| rs17082511 | 9 | 81306157 | C | 0.01183 |
| rs1329580  | 9 | 81776189 | G | 0.00913 |
| rs17084245 | 9 | 82653097 | T | 0.00850 |
| rs7862233  | 9 | 82911008 | G | 0.00641 |
| rs10780510 | 9 | 83149231 | C | 0.00867 |
| rs947673   | 9 | 83444937 | T | 0.00000 |
| rs4877221  | 9 | 83452715 | G | 0.01165 |
| rs1413797  | 9 | 83717339 | A | 0.00164 |
| rs10512130 | 9 | 84417587 | T | 0.00359 |
| rs4877708  | 9 | 84589743 | G | 0.00737 |
| rs4877709  | 9 | 84590086 | C | 0.00161 |
| rs7872040  | 9 | 84739651 | G | 0.00153 |
| rs7864580  | 9 | 85001962 | G | 0.00095 |
| rs12339855 | 9 | 85066219 | A | 0.00146 |
| rs11140077 | 9 | 85228938 | A | 0.01058 |

|            |   |          |   |          |
|------------|---|----------|---|----------|
| rs10868019 | 9 | 85288912 | T | 0.00356  |
| rs4877791  | 9 | 85472161 | C | 0.00573  |
| rs973460   | 9 | 85856918 | C | 0.01460  |
| rs7033778  | 9 | 85861585 | C | 0.01622  |
| rs1436932  | 9 | 85863663 | A | 0.01003  |
| rs7026159  | 9 | 86039924 | T | 0.00071  |
| rs1932649  | 9 | 86059945 | T | 0.01658  |
| rs11140475 | 9 | 86061696 | G | 0.01467  |
| rs7848051  | 9 | 86062589 | G | 0.01619  |
| rs6559779  | 9 | 86095927 | G | 0.01609  |
| rs885003   | 9 | 86099255 | G | 13.00700 |
| rs12342617 | 9 | 86106730 | A | 0.01598  |
| rs11140507 | 9 | 86115568 | A | 0.01577  |
| rs10780660 | 9 | 86115666 | A | 0.01534  |
| rs10780661 | 9 | 86116127 | G | 0.01443  |
| rs11140508 | 9 | 86116712 | C | 0.01534  |
| rs984430   | 9 | 86772647 | T | 0.01196  |
| rs4877895  | 9 | 86803143 | G | 0.00169  |
| rs1565450  | 9 | 86840655 | G | 0.01393  |
| rs2780936  | 9 | 86889466 | C | 0.01194  |
| rs4877959  | 9 | 87836523 | C | 0.00213  |
| rs7874443  | 9 | 87915576 | A | 0.00687  |
| rs10868394 | 9 | 88013838 | T | 0.01232  |
| rs353785   | 9 | 88289182 | T | 0.00808  |
| rs1929463  | 9 | 88480120 | G | 0.01036  |
| rs927524   | 9 | 89082420 | A | 0.01005  |
| rs6559978  | 9 | 89122734 | C | 0.00186  |
| rs6560003  | 9 | 89360555 | T | 0.00593  |
| rs11141879 | 9 | 89360808 | G | 0.01073  |
| rs7852573  | 9 | 89361340 | C | 0.00797  |
| rs11141909 | 9 | 89408672 | T | 0.01516  |
| rs7044513  | 9 | 89417269 | G | 0.01529  |
| rs2947237  | 9 | 89756389 | G | 0.01021  |
| rs529051   | 9 | 89852575 | C | 0.01643  |
| rs2051138  | 9 | 90528999 | A | 0.00297  |
| rs905362   | 9 | 90684334 | C | 0.01251  |
| rs9410435  | 9 | 90756021 | C | 0.01574  |
| rs944481   | 9 | 90843107 | G | 0.00663  |
| rs17529841 | 9 | 91218889 | G | 0.01649  |
| rs10908931 | 9 | 91295097 | T | 0.00328  |
| rs17440913 | 9 | 91343208 | G | 0.00740  |
| rs10429497 | 9 | 91401682 | A | 0.00255  |
| rs7025971  | 9 | 91733701 | T | 0.01486  |
| rs10993331 | 9 | 91766807 | G | 0.01546  |

|            |   |           |   |         |
|------------|---|-----------|---|---------|
| rs601472   | 9 | 91816515  | G | 0.00997 |
| rs1777044  | 9 | 92136871  | C | 0.00871 |
| rs748121   | 9 | 92151848  | C | 0.01484 |
| rs10821427 | 9 | 92225760  | T | 0.00128 |
| rs10993697 | 9 | 92615787  | A | 0.01008 |
| rs965892   | 9 | 92669610  | G | 0.00068 |
| rs158690   | 9 | 92696806  | G | 0.00460 |
| rs12344755 | 9 | 92698773  | C | 0.00328 |
| rs2184540  | 9 | 92841029  | A | 0.00564 |
| rs7869771  | 9 | 93220448  | C | 0.01102 |
| rs7867022  | 9 | 93261356  | C | 0.00032 |
| rs7039956  | 9 | 93315663  | A | 0.01172 |
| rs6479357  | 9 | 93350488  | A | 0.01583 |
| rs902922   | 9 | 93373538  | T | 0.00362 |
| rs10465156 | 9 | 93960316  | T | 0.00738 |
| rs471478   | 9 | 94040930  | G | 0.01577 |
| rs710162   | 9 | 94099611  | T | 0.00642 |
| rs7853859  | 9 | 94191198  | A | 0.00451 |
| rs10992471 | 9 | 94599326  | G | 0.01038 |
| rs10992675 | 9 | 95003137  | G | 0.01110 |
| rs3001450  | 9 | 95125191  | G | 0.00389 |
| rs11791374 | 9 | 95285108  | C | 0.00286 |
| rs10821147 | 9 | 95311188  | A | 0.01052 |
| rs10761238 | 9 | 95391038  | G | 0.01185 |
| rs2994370  | 9 | 95407641  | G | 0.00657 |
| rs10117505 | 9 | 95710034  | G | 0.00882 |
| rs7042271  | 9 | 96794268  | T | 0.00086 |
| rs7033633  | 9 | 96878602  | A | 0.00837 |
| rs356689   | 9 | 97026515  | A | 0.00350 |
| rs10283758 | 9 | 97040020  | G | 0.00403 |
| rs4743091  | 9 | 97417012  | A | 0.00213 |
| rs7854560  | 9 | 97422771  | T | 0.00249 |
| rs4743123  | 9 | 97440063  | G | 0.00151 |
| rs12552255 | 9 | 97476979  | G | 0.01591 |
| rs700983   | 9 | 97533546  | A | 0.00915 |
| rs4743271  | 9 | 97548449  | T | 0.00814 |
| rs4743272  | 9 | 97548530  | G | 0.00477 |
| rs17396240 | 9 | 97778620  | G | 0.00552 |
| rs1857085  | 9 | 98989016  | A | 0.00758 |
| rs1877431  | 9 | 99573968  | T | 0.00197 |
| rs993501   | 9 | 99663198  | G | 0.00043 |
| rs2151214  | 9 | 100270042 | A | 0.00968 |
| rs2779563  | 9 | 100317637 | A | 0.00608 |
| rs10081642 | 9 | 100428597 | T | 0.00081 |

|            |   |           |   |         |
|------------|---|-----------|---|---------|
| rs334353   | 9 | 100948186 | C | 0.00639 |
| rs10988776 | 9 | 101151735 | T | 0.00596 |
| rs10819808 | 9 | 102486074 | A | 0.01601 |
| rs2052977  | 9 | 103033320 | T | 0.00718 |
| rs12237965 | 9 | 103061577 | G | 0.01627 |
| rs17189604 | 9 | 103404710 | A | 0.01209 |
| rs2786720  | 9 | 103578372 | T | 0.01389 |
| rs10819994 | 9 | 103594577 | C | 0.00830 |
| rs10739816 | 9 | 103656291 | G | 0.00819 |
| rs7037831  | 9 | 104007544 | C | 0.01151 |
| rs10989911 | 9 | 104049649 | T | 0.00708 |
| rs10990034 | 9 | 104162114 | T | 0.00900 |
| rs10990041 | 9 | 104167500 | C | 0.00324 |
| rs860935   | 9 | 104631779 | A | 0.00687 |
| rs16922210 | 9 | 104634220 | A | 0.01341 |
| rs2843571  | 9 | 104928708 | C | 0.01112 |
| rs10120196 | 9 | 104939864 | C | 0.01661 |
| rs925224   | 9 | 105304375 | T | 0.00067 |
| rs1373247  | 9 | 105758142 | T | 0.01341 |
| rs41448350 | 9 | 106333586 | T | 0.00720 |
| rs10739904 | 9 | 106470783 | T | 0.00853 |
| rs2297406  | 9 | 106591359 | T | 0.00238 |
| rs10512337 | 9 | 106720551 | G | 0.01030 |
| rs4237211  | 9 | 106778510 | C | 0.00860 |
| rs10978606 | 9 | 108517848 | A | 0.01002 |
| rs817870   | 9 | 109184509 | G | 0.00780 |
| rs4979248  | 9 | 109488305 | T | 0.00565 |
| rs2417805  | 9 | 109606932 | T | 0.00026 |
| rs10979150 | 9 | 109782342 | A | 0.00466 |
| rs7042321  | 9 | 109881414 | T | 0.01636 |
| rs10979206 | 9 | 109900334 | G | 0.01519 |
| rs559603   | 9 | 109944558 | G | 0.01252 |
| rs7044959  | 9 | 110341967 | T | 0.00116 |
| rs10979392 | 9 | 110348705 | C | 0.01495 |
| rs10979405 | 9 | 110375089 | A | 0.00888 |
| rs12551911 | 9 | 110375416 | T | 0.00570 |
| rs7867793  | 9 | 110428587 | C | 0.01239 |
| rs2900469  | 9 | 110449978 | G | 0.00280 |
| rs1994807  | 9 | 110464975 | T | 0.00269 |
| rs16913434 | 9 | 110488445 | C | 0.00496 |
| rs10116332 | 9 | 110595461 | A | 0.00497 |
| rs4339712  | 9 | 110627972 | G | 0.00801 |
| rs13296942 | 9 | 110643188 | G | 0.01438 |
| rs10114192 | 9 | 110661885 | A | 0.01172 |

|            |   |           |   |         |
|------------|---|-----------|---|---------|
| rs7048295  | 9 | 110993528 | A | 0.00668 |
| rs10979805 | 9 | 111092056 | T | 0.00702 |
| rs7857453  | 9 | 111394619 | C | 0.00367 |
| rs2025878  | 9 | 111561356 | C | 0.00531 |
| rs3983508  | 9 | 111617994 | C | 0.00846 |
| rs1327535  | 9 | 112175998 | C | 0.00166 |
| rs10980446 | 9 | 112364717 | G | 0.00321 |
| rs498102   | 9 | 112633720 | T | 0.01602 |
| rs866624   | 9 | 113127517 | T | 0.00243 |
| rs6477821  | 9 | 113184850 | G | 0.01437 |
| rs4978996  | 9 | 113203078 | A | 0.01334 |
| rs12350676 | 9 | 113209951 | A | 0.00710 |
| rs4978998  | 9 | 113258768 | C | 0.01489 |
| rs4448355  | 9 | 113322866 | T | 0.01584 |
| rs6477867  | 9 | 113773323 | C | 0.00051 |
| rs10739343 | 9 | 114121319 | G | 0.00862 |
| rs10817406 | 9 | 114722537 | T | 0.00910 |
| rs10981975 | 9 | 115654279 | T | 0.01131 |
| rs4979354  | 9 | 116013576 | T | 0.01527 |
| rs999599   | 9 | 116051416 | T | 0.00458 |
| rs4979454  | 9 | 116495996 | G | 0.00399 |
| rs1272041  | 9 | 116895328 | C | 0.01191 |
| rs955387   | 9 | 117031013 | A | 0.00191 |
| rs3119587  | 9 | 117046393 | T | 0.00198 |
| rs1414153  | 9 | 117082174 | T | 0.00317 |
| rs1989766  | 9 | 117212106 | G | 0.00219 |
| rs4979530  | 9 | 117246596 | A | 0.00375 |
| rs1858731  | 9 | 117290615 | A | 0.00890 |
| rs1450194  | 9 | 117771594 | C | 0.00591 |
| rs10983186 | 9 | 118275387 | C | 0.01256 |
| rs2900132  | 9 | 118449459 | T | 0.00946 |
| rs10983314 | 9 | 118514893 | T | 0.01635 |
| rs10983319 | 9 | 118523287 | T | 0.00821 |
| rs2182552  | 9 | 118660584 | T | 0.00292 |
| rs11788987 | 9 | 118717375 | T | 0.01476 |
| rs10983479 | 9 | 118856060 | A | 0.01143 |
| rs10983560 | 9 | 118983612 | G | 0.01001 |
| rs10983577 | 9 | 119028228 | C | 0.01237 |
| rs10983650 | 9 | 119229592 | T | 0.00215 |
| rs1415377  | 9 | 119231794 | G | 0.00865 |
| rs4481682  | 9 | 119603089 | A | 0.00268 |
| rs1573082  | 9 | 120102558 | T | 0.00239 |
| rs10984106 | 9 | 120394320 | T | 0.00271 |
| rs10115939 | 9 | 120458542 | T | 0.01504 |

|            |   |           |   |         |
|------------|---|-----------|---|---------|
| rs4440690  | 9 | 120478857 | T | 0.00363 |
| rs10984298 | 9 | 120710357 | G | 0.00087 |
| rs10984333 | 9 | 120751241 | C | 0.01196 |
| rs4512453  | 9 | 120763836 | A | 0.00506 |
| rs724975   | 9 | 120828533 | G | 0.00621 |
| rs1571903  | 9 | 121047881 | A | 0.00523 |
| rs1221139  | 9 | 121073375 | G | 0.01040 |
| rs1412067  | 9 | 121207062 | C | 0.01403 |
| rs7032141  | 9 | 121293819 | G | 0.01528 |
| rs12343913 | 9 | 121525825 | A | 0.00463 |
| rs846825   | 9 | 122133808 | G | 0.00600 |
| rs10984898 | 9 | 122179045 | C | 0.00639 |
| rs17343890 | 9 | 122389520 | A | 0.01036 |
| rs7022941  | 9 | 122907291 | C | 0.00235 |
| rs10739594 | 9 | 123075201 | G | 0.00188 |
| rs7022103  | 9 | 123732934 | A | 0.01337 |
| rs10985462 | 9 | 123749107 | G | 0.00501 |
| rs11999461 | 9 | 123761759 | T | 0.01609 |
| rs10513388 | 9 | 123856819 | C | 0.01292 |
| rs3818638  | 9 | 123946544 | C | 0.00338 |
| rs3808899  | 9 | 124032645 | G | 0.01022 |
| rs10818653 | 9 | 124039773 | C | 0.00600 |
| rs10760215 | 9 | 124044926 | A | 0.00835 |
| rs10760220 | 9 | 124065983 | A | 0.00210 |
| rs4836897  | 9 | 124368297 | A | 0.00161 |
| rs625440   | 9 | 124821723 | C | 0.01435 |
| rs7039823  | 9 | 125759322 | G | 0.01273 |
| rs944333   | 9 | 126126823 | G | 0.00066 |
| rs16927388 | 9 | 126159263 | A | 0.00465 |
| rs10818977 | 9 | 126269939 | C | 0.01183 |
| rs4076333  | 9 | 126425430 | G | 0.00929 |
| rs12341193 | 9 | 126688749 | T | 0.01012 |
| rs494760   | 9 | 127365776 | C | 0.00510 |
| rs476819   | 9 | 127402558 | C | 0.01240 |
| rs2536947  | 9 | 128104832 | G | 0.00184 |
| rs4837072  | 9 | 128181435 | G | 0.00797 |
| rs16929673 | 9 | 128995383 | A | 0.00124 |
| rs7863063  | 9 | 129146599 | T | 0.00281 |
| rs10987613 | 9 | 129165005 | A | 0.01018 |
| rs4837271  | 9 | 130281629 | T | 0.01392 |
| rs869455   | 9 | 130329421 | C | 0.01560 |
| rs10760563 | 9 | 130343343 | C | 0.00139 |
| rs2297771  | 9 | 130377664 | C | 0.01160 |
| rs7041665  | 9 | 130830966 | T | 0.00231 |

|            |    |           |   |         |
|------------|----|-----------|---|---------|
| rs2480448  | 9  | 131036536 | G | 0.00652 |
| rs10118527 | 9  | 131202291 | G | 0.00253 |
| rs4837375  | 9  | 131333483 | C | 0.01475 |
| rs1220667  | 9  | 131390342 | T | 0.01631 |
| rs6478924  | 9  | 131706896 | G | 0.00229 |
| rs41354949 | 9  | 131969858 | T | 0.00305 |
| rs7855331  | 9  | 132252642 | T | 0.00138 |
| rs11243976 | 9  | 132478315 | T | 0.00003 |
| rs353541   | 9  | 133004762 | C | 0.01155 |
| rs541216   | 9  | 133175299 | A | 0.00691 |
| rs3765543  | 9  | 133448145 | T | 0.00960 |
| rs2282009  | 9  | 133485790 | G | 0.00276 |
| rs12375830 | 9  | 133487679 | G | 0.00802 |
| rs6597515  | 9  | 133522233 | C | 0.00720 |
| rs1571832  | 9  | 133987802 | G | 0.00937 |
| rs2296869  | 9  | 134162233 | T | 0.00532 |
| rs2296870  | 9  | 134162486 | C | 0.01065 |
| rs2296871  | 9  | 134163506 | A | 0.00971 |
| rs11243737 | 9  | 134218427 | G | 0.00497 |
| rs7021144  | 9  | 134372019 | G | 0.01197 |
| rs518457   | 9  | 134376336 | A | 0.01177 |
| rs1999121  | 9  | 134592548 | G | 0.00150 |
| rs12550888 | 9  | 134595260 | A | 0.00941 |
| rs1179037  | 9  | 135228330 | A | 0.00639 |
| rs764897   | 9  | 135933825 | G | 0.01264 |
| rs3132288  | 9  | 136481319 | A | 0.00099 |
| rs2989733  | 9  | 136963614 | T | 0.00328 |
| rs10858305 | 9  | 136998239 | G | 0.01173 |
| rs11793918 | 9  | 137012668 | T | 0.00872 |
| rs13290953 | 9  | 137026781 | G | 0.01088 |
| rs684270   | 9  | 137083746 | C | 0.00967 |
| rs10858336 | 9  | 137144989 | C | 0.01442 |
| rs11790027 | 9  | 137148064 | A | 0.01539 |
| rs11103796 | 9  | 137321049 | C | 0.00862 |
| rs11103291 | 9  | 138087620 | A | 0.01333 |
| rs11145861 | 9  | 138408197 | T | 0.01192 |
| rs950078   | 9  | 139586637 | G | 0.01133 |
| rs10867070 | 9  | 139805843 | C | 0.00158 |
| rs9777369  | 9  | 140138244 | T | 0.01073 |
| rs11253253 | 10 | 611653    | A | 0.00674 |
| rs11253424 | 10 | 803426    | C | 0.00663 |
| rs11253441 | 10 | 818288    | T | 0.01337 |
| rs11817793 | 10 | 868895    | T | 0.00247 |
| rs11250267 | 10 | 1146487   | G | 0.00492 |

|            |    |         |   |         |
|------------|----|---------|---|---------|
| rs2805575  | 10 | 1394665 | G | 0.00090 |
| rs2813381  | 10 | 1610625 | T | 0.00832 |
| rs7086346  | 10 | 1655821 | C | 0.01644 |
| rs11250832 | 10 | 1888716 | T | 0.00658 |
| rs11250839 | 10 | 1892367 | C | 0.00640 |
| rs4077784  | 10 | 1892429 | A | 0.00052 |
| rs10794794 | 10 | 1892670 | T | 0.00210 |
| rs1010571  | 10 | 2016408 | G | 0.00360 |
| rs11813772 | 10 | 2394079 | T | 0.01372 |
| rs12265744 | 10 | 2484461 | T | 0.01620 |
| rs11251389 | 10 | 2624260 | G | 0.00823 |
| rs17158677 | 10 | 2629732 | G | 0.01109 |
| rs17158687 | 10 | 2635905 | A | 0.01557 |
| rs1008860  | 10 | 2726706 | A | 0.00617 |
| rs11251448 | 10 | 2747555 | G | 0.01077 |
| rs11251468 | 10 | 2756759 | G | 0.00906 |
| rs11251469 | 10 | 2756921 | G | 0.00100 |
| rs2502073  | 10 | 2974699 | A | 0.00054 |
| rs10904000 | 10 | 3297540 | T | 0.01421 |
| rs1962663  | 10 | 3514893 | C | 0.01217 |
| rs705478   | 10 | 3572348 | C | 0.00742 |
| rs7911947  | 10 | 3584187 | T | 0.01281 |
| rs17315959 | 10 | 3599546 | G | 0.00836 |
| rs2171302  | 10 | 3805292 | G | 0.01657 |
| rs11599077 | 10 | 3937069 | A | 0.01055 |
| rs7350412  | 10 | 3942714 | T | 0.00491 |
| rs4572033  | 10 | 3946173 | C | 0.00411 |
| rs12782979 | 10 | 4377643 | G | 0.00824 |
| rs11252540 | 10 | 4486210 | T | 0.01447 |
| rs10904310 | 10 | 4683742 | T | 0.00613 |
| rs11252655 | 10 | 4710626 | A | 0.00813 |
| rs11595123 | 10 | 4822920 | G | 0.00560 |
| rs10795202 | 10 | 4883318 | A | 0.00994 |
| rs7071257  | 10 | 4916008 | G | 0.00534 |
| rs10904392 | 10 | 5058113 | G | 0.00296 |
| rs4881394  | 10 | 5103711 | A | 0.00701 |
| rs2298305  | 10 | 5129886 | T | 0.00228 |
| rs4077511  | 10 | 5568172 | G | 0.00431 |
| rs7896428  | 10 | 5685039 | A | 0.00122 |
| rs11258725 | 10 | 5760430 | A | 0.01365 |
| rs2669130  | 10 | 6022583 | T | 0.00626 |
| rs11596750 | 10 | 6511822 | C | 0.00137 |
| rs7920034  | 10 | 6831198 | A | 0.00899 |
| rs12570350 | 10 | 6835499 | T | 0.00672 |



|            |    |          |   |         |
|------------|----|----------|---|---------|
| rs11254759 | 10 | 6897313  | A | 0.01043 |
| rs11254798 | 10 | 6922666  | A | 0.01663 |
| rs11254836 | 10 | 6955867  | G | 0.01287 |
| rs12261850 | 10 | 6996192  | G | 0.01575 |
| rs7912259  | 10 | 7012861  | G | 0.01553 |
| rs11254934 | 10 | 7076900  | A | 0.01309 |
| rs10905087 | 10 | 7082276  | G | 0.01261 |
| rs9423765  | 10 | 7152082  | G | 0.00850 |
| rs7906988  | 10 | 7194153  | A | 0.00644 |
| rs17142501 | 10 | 7194927  | G | 0.00833 |
| rs942432   | 10 | 7202570  | A | 0.00017 |
| rs2245977  | 10 | 7568727  | G | 0.00431 |
| rs2388139  | 10 | 7576313  | T | 0.01076 |
| rs7904080  | 10 | 7672592  | G | 0.00451 |
| rs2182652  | 10 | 7775882  | C | 0.00608 |
| rs4001985  | 10 | 8590996  | G | 0.01656 |
| rs4747803  | 10 | 8632827  | A | 0.01517 |
| rs11255804 | 10 | 8747207  | A | 0.00285 |
| rs7912831  | 10 | 8771261  | G | 0.00071 |
| rs1243411  | 10 | 9009808  | T | 0.00194 |
| rs6602348  | 10 | 9051752  | T | 0.01619 |
| rs41341945 | 10 | 9062844  | C | 0.00131 |
| rs2760206  | 10 | 9141442  | A | 0.01517 |
| rs17145188 | 10 | 9148524  | A | 0.00409 |
| rs17145278 | 10 | 9212297  | C | 0.00573 |
| rs10905523 | 10 | 9244955  | T | 0.00561 |
| rs11256103 | 10 | 9255068  | G | 0.01066 |
| rs1001019  | 10 | 9283791  | T | 0.00916 |
| rs12269159 | 10 | 9425092  | A | 0.00606 |
| rs1762766  | 10 | 9444181  | T | 0.00011 |
| rs2477043  | 10 | 9449003  | C | 0.00862 |
| rs4749869  | 10 | 9557144  | A | 0.00217 |
| rs4749871  | 10 | 9557305  | T | 0.00616 |
| rs10905607 | 10 | 9783187  | C | 0.01665 |
| rs2050775  | 10 | 9975691  | T | 0.01555 |
| rs11256530 | 10 | 10289903 | G | 0.01485 |
| rs7896224  | 10 | 10513853 | T | 0.01303 |
| rs9651524  | 10 | 10608975 | G | 0.00863 |
| rs6602466  | 10 | 10997996 | G | 0.00989 |
| rs2773490  | 10 | 11162621 | C | 0.00757 |
| rs1291822  | 10 | 11176509 | A | 0.00019 |
| rs7917066  | 10 | 11435230 | A | 0.00513 |
| rs2440100  | 10 | 11484876 | T | 0.00725 |
| rs2440110  | 10 | 11494638 | A | 0.00519 |

|            |    |          |   |         |
|------------|----|----------|---|---------|
| rs2455596  | 10 | 11505909 | A | 0.01252 |
| rs10008    | 10 | 11646301 | A | 0.01165 |
| rs12217971 | 10 | 12378632 | G | 0.00735 |
| rs11257707 | 10 | 12404212 | G | 0.00800 |
| rs2768428  | 10 | 12563135 | A | 0.01546 |
| rs2648707  | 10 | 12651393 | C | 0.00571 |
| rs10732936 | 10 | 12673372 | T | 0.01054 |
| rs11258001 | 10 | 12889254 | A | 0.00243 |
| rs10906228 | 10 | 12889796 | A | 0.00078 |
| rs11258009 | 10 | 12895162 | G | 0.00153 |
| rs10906308 | 10 | 13210473 | T | 0.01167 |
| rs10906317 | 10 | 13247283 | C | 0.00539 |
| rs7073480  | 10 | 13254166 | C | 0.01544 |
| rs11258459 | 10 | 13676307 | A | 0.01614 |
| rs7910585  | 10 | 13692836 | G | 0.00151 |
| rs10508463 | 10 | 13724849 | G | 0.00408 |
| rs11258494 | 10 | 13724911 | C | 0.00965 |
| rs10508464 | 10 | 13725082 | G | 0.00573 |
| rs10508465 | 10 | 13725194 | T | 0.01354 |
| rs4626964  | 10 | 13725557 | C | 0.01604 |
| rs13005    | 10 | 13725772 | T | 0.01482 |
| rs7088464  | 10 | 13923957 | T | 0.00696 |
| rs17154458 | 10 | 14108506 | C | 0.01220 |
| rs11258843 | 10 | 14140238 | A | 0.00516 |
| rs7095572  | 10 | 14158090 | T | 0.00900 |
| rs968273   | 10 | 14168566 | A | 0.00946 |
| rs17154745 | 10 | 14236892 | G | 0.00019 |
| rs7095401  | 10 | 14298284 | A | 0.00823 |
| rs654608   | 10 | 14468478 | T | 0.00401 |
| rs11259166 | 10 | 14620338 | T | 0.00977 |
| rs11259193 | 10 | 14651316 | C | 0.01034 |
| rs10906752 | 10 | 14818107 | G | 0.01037 |
| rs2601735  | 10 | 14867137 | C | 0.01350 |
| rs12218679 | 10 | 15398069 | T | 0.00093 |
| rs11259651 | 10 | 15504677 | A | 0.01355 |
| rs7905319  | 10 | 15837204 | C | 0.00755 |
| rs4748231  | 10 | 16056279 | A | 0.01289 |
| rs17138511 | 10 | 16466321 | T | 0.00681 |
| rs7082220  | 10 | 16469618 | T | 0.00874 |
| rs7899419  | 10 | 16751463 | T | 0.01527 |
| rs7921270  | 10 | 17081765 | G | 0.00868 |
| rs5009752  | 10 | 17344934 | A | 0.01258 |
| rs359288   | 10 | 17370186 | A | 0.00398 |
| rs10508553 | 10 | 18270265 | A | 0.01617 |

|            |    |          |   |         |
|------------|----|----------|---|---------|
| rs2357782  | 10 | 18354073 | A | 0.00901 |
| rs11598236 | 10 | 18491890 | C | 0.00752 |
| rs12413195 | 10 | 18510335 | C | 0.00745 |
| rs1277767  | 10 | 18538404 | C | 0.01534 |
| rs1779246  | 10 | 18546917 | C | 0.00411 |
| rs1556116  | 10 | 19195087 | C | 0.00916 |
| rs7083348  | 10 | 19382092 | C | 0.01258 |
| rs6481814  | 10 | 19574958 | T | 0.00897 |
| rs2499065  | 10 | 19612735 | G | 0.00362 |
| rs11009410 | 10 | 19641830 | C | 0.01409 |
| rs11009595 | 10 | 19684979 | T | 0.01580 |
| rs1591345  | 10 | 19685245 | T | 0.00965 |
| rs7079302  | 10 | 19733181 | A | 0.00825 |
| rs1926204  | 10 | 20283648 | T | 0.00552 |
| rs7922905  | 10 | 20534950 | C | 0.01060 |
| rs16920092 | 10 | 20540598 | G | 0.01289 |
| rs7073927  | 10 | 20556872 | T | 0.00849 |
| rs7074175  | 10 | 20556984 | T | 0.00461 |
| rs11012058 | 10 | 20796893 | C | 0.01245 |
| rs4437938  | 10 | 22381427 | C | 0.00336 |
| rs4266962  | 10 | 22381580 | G | 0.01463 |
| rs11012989 | 10 | 22748913 | A | 0.01122 |
| rs6482213  | 10 | 22764104 | G | 0.00534 |
| rs7914254  | 10 | 22780965 | A | 0.00781 |
| rs2154053  | 10 | 22977766 | T | 0.00817 |
| rs4748822  | 10 | 23136360 | C | 0.00341 |
| rs7899968  | 10 | 23204056 | A | 0.00820 |
| rs17440393 | 10 | 23277574 | A | 0.01095 |
| rs11013210 | 10 | 23289115 | T | 0.00702 |
| rs986151   | 10 | 23518621 | C | 0.00664 |
| rs2137157  | 10 | 23765898 | C | 0.00729 |
| rs6482286  | 10 | 23808903 | A | 0.01481 |
| rs17504419 | 10 | 24547825 | T | 0.00706 |
| rs16924755 | 10 | 24763665 | T | 0.01356 |
| rs12358959 | 10 | 25573016 | C | 0.00852 |
| rs1329255  | 10 | 25821413 | T | 0.00380 |
| rs7072700  | 10 | 25828641 | C | 0.01525 |
| rs10828810 | 10 | 25828674 | C | 0.00232 |
| rs7899012  | 10 | 25881321 | T | 0.00744 |
| rs4747532  | 10 | 25905769 | G | 0.00108 |
| rs11014625 | 10 | 25909549 | T | 0.00862 |
| rs11014632 | 10 | 25917657 | A | 0.00548 |
| rs7904360  | 10 | 26244985 | C | 0.00603 |
| rs787031   | 10 | 26837384 | T | 0.00110 |

|            |    |          |   |         |
|------------|----|----------|---|---------|
| rs4749184  | 10 | 27060574 | T | 0.01236 |
| rs7896781  | 10 | 27295757 | T | 0.00902 |
| rs11015433 | 10 | 27296142 | G | 0.00225 |
| rs16927781 | 10 | 27709485 | T | 0.00099 |
| rs532473   | 10 | 27709661 | T | 0.00257 |
| rs1413895  | 10 | 27722150 | C | 0.00328 |
| rs517060   | 10 | 27722495 | C | 0.01470 |
| rs7072380  | 10 | 27922831 | T | 0.01209 |
| rs1908274  | 10 | 27946218 | T | 0.01384 |
| rs12414929 | 10 | 28498769 | A | 0.01181 |
| rs11007102 | 10 | 28760828 | G | 0.00554 |
| rs17692012 | 10 | 29085027 | T | 0.01005 |
| rs7918685  | 10 | 29175932 | C | 0.00290 |
| rs501561   | 10 | 29407769 | G | 0.01442 |
| rs2211397  | 10 | 29590393 | A | 0.00429 |
| rs2488264  | 10 | 29609361 | A | 0.01132 |
| rs10763702 | 10 | 29621792 | G | 0.01099 |
| rs10763704 | 10 | 29626489 | A | 0.00532 |
| rs16930161 | 10 | 29643626 | G | 0.01051 |
| rs789913   | 10 | 29690525 | T | 0.00231 |
| rs11007683 | 10 | 29975384 | C | 0.00372 |
| rs17778999 | 10 | 29975784 | A | 0.01356 |
| rs1247097  | 10 | 30081073 | T | 0.00041 |
| rs10763778 | 10 | 30654280 | A | 0.00349 |
| rs10826786 | 10 | 30680405 | G | 0.00887 |
| rs8176983  | 10 | 30771645 | T | 0.00981 |
| rs8176984  | 10 | 30771666 | A | 0.00884 |
| rs7074198  | 10 | 30901965 | G | 0.00146 |
| rs4362058  | 10 | 30902073 | G | 0.00966 |
| rs16931828 | 10 | 30990752 | G | 0.01481 |
| rs17295402 | 10 | 31094110 | T | 0.00909 |
| rs7910849  | 10 | 31144546 | G | 0.00320 |
| rs11008296 | 10 | 31199671 | A | 0.00218 |
| rs2487457  | 10 | 31383794 | C | 0.01452 |
| rs7075638  | 10 | 31871836 | T | 0.00774 |
| rs11008826 | 10 | 32522055 | T | 0.00314 |
| rs2505382  | 10 | 32801068 | A | 0.00663 |
| rs16933616 | 10 | 33021367 | C | 0.01230 |
| rs7088801  | 10 | 33408650 | A | 0.00668 |
| rs11009228 | 10 | 33433860 | T | 0.00035 |
| rs2812617  | 10 | 34113351 | T | 0.01401 |
| rs1692708  | 10 | 34461560 | C | 0.00282 |
| rs10827330 | 10 | 34464515 | T | 0.01131 |
| rs1148242  | 10 | 34481223 | C | 0.01186 |

|            |    |          |   |         |
|------------|----|----------|---|---------|
| rs642099   | 10 | 34513449 | C | 0.00217 |
| rs678188   | 10 | 34535295 | G | 0.00634 |
| rs11009685 | 10 | 34551996 | C | 0.00512 |
| rs1111267  | 10 | 34567393 | T | 0.00771 |
| rs664538   | 10 | 34617703 | A | 0.01297 |
| rs977677   | 10 | 36130658 | C | 0.00429 |
| rs1819748  | 10 | 36267393 | T | 0.00530 |
| rs315604   | 10 | 36535755 | C | 0.00898 |
| rs2122723  | 10 | 36591137 | A | 0.01463 |
| rs3924753  | 10 | 36793219 | T | 0.00216 |
| rs2483008  | 10 | 36899882 | G | 0.00089 |
| rs1192684  | 10 | 37212810 | T | 0.00911 |
| rs1200820  | 10 | 37599485 | C | 0.00803 |
| rs1200826  | 10 | 37604993 | G | 0.00751 |
| rs10740944 | 10 | 37932950 | C | 0.00110 |
| rs289642   | 10 | 37981342 | A | 0.00779 |
| rs2505830  | 10 | 42155347 | G | 0.01585 |
| rs2744070  | 10 | 42693206 | A | 0.01619 |
| rs788261   | 10 | 42757976 | G | 0.01204 |
| rs1864403  | 10 | 42924956 | T | 0.01456 |
| rs7909314  | 10 | 43667069 | C | 0.00751 |
| rs11238994 | 10 | 44149211 | C | 0.00794 |
| rs928565   | 10 | 44152890 | T | 0.01471 |
| rs1253718  | 10 | 44282888 | T | 0.01432 |
| rs1572202  | 10 | 44330166 | C | 0.00950 |
| rs17157832 | 10 | 45281767 | C | 0.01228 |
| rs4979664  | 10 | 46505309 | G | 0.00850 |
| rs750211   | 10 | 47062190 | A | 0.00307 |
| rs7069401  | 10 | 47067457 | A | 0.00791 |
| rs11259760 | 10 | 47110611 | G | 0.00989 |
| rs4385821  | 10 | 47120957 | C | 0.01147 |
| rs9325886  | 10 | 48032343 | T | 0.00872 |
| rs7074717  | 10 | 48221906 | C | 0.01443 |
| rs10857548 | 10 | 49088476 | T | 0.00524 |
| rs10857580 | 10 | 49356390 | A | 0.00331 |
| rs6537565  | 10 | 49382078 | G | 0.01315 |
| rs12768835 | 10 | 49646975 | A | 0.00440 |
| rs6537576  | 10 | 49649839 | T | 0.00285 |
| rs11101474 | 10 | 49651442 | C | 0.01589 |
| rs12242220 | 10 | 49698112 | T | 0.01387 |
| rs2620891  | 10 | 49699711 | G | 0.01013 |
| rs10857650 | 10 | 49700029 | A | 0.00623 |
| rs3747878  | 10 | 49700248 | C | 0.00469 |
| rs7922169  | 10 | 49715462 | G | 0.01434 |

|            |    |          |   |         |
|------------|----|----------|---|---------|
| rs2620887  | 10 | 49730508 | T | 0.00685 |
| rs2671713  | 10 | 49761168 | A | 0.00210 |
| rs2671711  | 10 | 49764792 | G | 0.01152 |
| rs12248178 | 10 | 49765425 | C | 0.00624 |
| rs1475256  | 10 | 50287769 | G | 0.00828 |
| rs4253077  | 10 | 50392975 | A | 0.00896 |
| rs3810947  | 10 | 50491249 | T | 0.00094 |
| rs1880676  | 10 | 50494123 | G | 0.01530 |
| rs10857520 | 10 | 50512030 | A | 0.00292 |
| rs10995100 | 10 | 52377032 | C | 0.00354 |
| rs7914943  | 10 | 52398619 | C | 0.01122 |
| rs7076364  | 10 | 52405002 | A | 0.01481 |
| rs2816836  | 10 | 52422379 | G | 0.00087 |
| rs2816835  | 10 | 52422640 | T | 0.00370 |
| rs10995339 | 10 | 52437180 | T | 0.00247 |
| rs7895755  | 10 | 52444054 | C | 0.00999 |
| rs10822095 | 10 | 52444923 | G | 0.01341 |
| rs10761774 | 10 | 52498177 | C | 0.00702 |
| rs9299465  | 10 | 52544506 | G | 0.00521 |
| rs10822867 | 10 | 52815711 | T | 0.00104 |
| rs17529748 | 10 | 52833546 | T | 0.00673 |
| rs17531066 | 10 | 52870282 | T | 0.01392 |
| rs10508944 | 10 | 52919580 | G | 0.01347 |
| rs10997802 | 10 | 52926845 | T | 0.00673 |
| rs1952138  | 10 | 52932639 | G | 0.01187 |
| rs10733839 | 10 | 52971456 | G | 0.00419 |
| rs17629265 | 10 | 53215988 | A | 0.00126 |
| rs10999898 | 10 | 53308102 | A | 0.01045 |
| rs7093940  | 10 | 53380226 | G | 0.00888 |
| rs11001444 | 10 | 53712562 | G | 0.00962 |
| rs11001909 | 10 | 53836193 | T | 0.00569 |
| rs7916982  | 10 | 54395856 | C | 0.00288 |
| rs7915769  | 10 | 54426191 | T | 0.00442 |
| rs6480996  | 10 | 54566822 | T | 0.00613 |
| rs2384124  | 10 | 54567756 | A | 0.01367 |
| rs12571782 | 10 | 54568138 | C | 0.00071 |
| rs2133469  | 10 | 54807251 | A | 0.00928 |
| rs2610891  | 10 | 55412724 | G | 0.01459 |
| rs2610873  | 10 | 55483294 | A | 0.01577 |
| rs7919046  | 10 | 55659436 | C | 0.00570 |
| rs1937393  | 10 | 56062569 | C | 0.00521 |
| rs6481116  | 10 | 56106514 | C | 0.00515 |
| rs11004466 | 10 | 56142441 | C | 0.01206 |
| rs10825383 | 10 | 56143760 | C | 0.01173 |

|            |    |          |   |         |
|------------|----|----------|---|---------|
| rs11004473 | 10 | 56144916 | T | 0.00965 |
| rs11004515 | 10 | 56162216 | T | 0.00893 |
| rs12772404 | 10 | 56577310 | C | 0.00904 |
| rs11004781 | 10 | 56658060 | T | 0.00994 |
| rs11004794 | 10 | 56699129 | A | 0.00585 |
| rs11004973 | 10 | 57127236 | G | 0.00875 |
| rs7902926  | 10 | 57304818 | T | 0.00886 |
| rs7897632  | 10 | 57390788 | A | 0.00875 |
| rs2131967  | 10 | 57391103 | G | 0.01541 |
| rs2172738  | 10 | 57391411 | T | 0.01641 |
| rs10825680 | 10 | 57391868 | A | 0.00049 |
| rs10763287 | 10 | 57424570 | A | 0.00010 |
| rs4384321  | 10 | 57448762 | G | 0.01025 |
| rs4384322  | 10 | 57448789 | G | 0.00955 |
| rs12098738 | 10 | 58057613 | A | 0.01309 |
| rs2818836  | 10 | 58340522 | A | 0.01619 |
| rs11817479 | 10 | 58380039 | A | 0.01634 |
| rs2055552  | 10 | 58636677 | T | 0.00774 |
| rs4623821  | 10 | 58998686 | A | 0.00673 |
| rs12245596 | 10 | 59487103 | C | 0.00142 |
| rs1759320  | 10 | 59507178 | G | 0.00713 |
| rs2486489  | 10 | 59746059 | C | 0.00458 |
| rs10740740 | 10 | 60052500 | G | 0.01229 |
| rs16912750 | 10 | 60298325 | C | 0.00161 |
| rs282674   | 10 | 60313342 | A | 0.01207 |
| rs7477459  | 10 | 60671321 | C | 0.00172 |
| rs7069283  | 10 | 60809191 | A | 0.00484 |
| rs7903343  | 10 | 60811072 | A | 0.01506 |
| rs7907910  | 10 | 61016383 | T | 0.00804 |
| rs10821582 | 10 | 61148825 | G | 0.01574 |
| rs2271564  | 10 | 61224012 | G | 0.01482 |
| rs1664278  | 10 | 61364310 | T | 0.01228 |
| rs6479674  | 10 | 61372270 | C | 0.01530 |
| rs10994219 | 10 | 61572095 | A | 0.01397 |
| rs7087489  | 10 | 61615937 | C | 0.00860 |
| rs10994285 | 10 | 61685013 | T | 0.01200 |
| rs2393673  | 10 | 62020372 | T | 0.00575 |
| rs1372711  | 10 | 62100671 | T | 0.01614 |
| rs2448353  | 10 | 62228617 | A | 0.01072 |
| rs2893863  | 10 | 62276790 | G | 0.00540 |
| rs7907823  | 10 | 62569407 | A | 0.00519 |
| rs2393855  | 10 | 62725471 | G | 0.00564 |
| rs7914904  | 10 | 62749969 | A | 0.00535 |
| rs2257189  | 10 | 62988025 | G | 0.01383 |

|            |    |          |   |         |
|------------|----|----------|---|---------|
| rs7904285  | 10 | 63135734 | G | 0.01585 |
| rs2588929  | 10 | 63294506 | C | 0.01454 |
| rs7896430  | 10 | 63560965 | A | 0.01012 |
| rs3999112  | 10 | 63854651 | G | 0.01130 |
| rs11598789 | 10 | 63881646 | A | 0.00243 |
| rs4745820  | 10 | 63923050 | G | 0.01251 |
| rs6479828  | 10 | 64045356 | C | 0.00703 |
| rs7915131  | 10 | 64088662 | A | 0.00780 |
| rs41474946 | 10 | 64311736 | A | 0.01091 |
| rs10740095 | 10 | 64343487 | A | 0.01208 |
| rs4746783  | 10 | 64421047 | T | 0.00863 |
| rs11817689 | 10 | 64594223 | C | 0.01512 |
| rs9415699  | 10 | 64813564 | C | 0.00654 |
| rs16918507 | 10 | 64915681 | T | 0.00491 |
| rs6479906  | 10 | 64985492 | C | 0.00169 |
| rs34816265 | 10 | 65276055 | G | 0.00223 |
| rs10509200 | 10 | 65296567 | A | 0.00170 |
| rs1916463  | 10 | 65364778 | G | 0.00590 |
| rs2394039  | 10 | 65538104 | A | 0.00626 |
| rs7920723  | 10 | 65876810 | A | 0.00204 |
| rs10740160 | 10 | 65980512 | A | 0.00190 |
| rs9414877  | 10 | 66648119 | C | 0.00358 |
| rs876057   | 10 | 66650986 | G | 0.00358 |
| rs10996304 | 10 | 66676003 | A | 0.00109 |
| rs7906982  | 10 | 66681694 | C | 0.01511 |
| rs9415814  | 10 | 66689678 | G | 0.01071 |
| rs7902125  | 10 | 66951266 | T | 0.01026 |
| rs12572984 | 10 | 67121576 | T | 0.00552 |
| rs17235168 | 10 | 67158318 | C | 0.00503 |
| rs17239782 | 10 | 67337001 | A | 0.00320 |
| rs1670159  | 10 | 67337138 | A | 0.00952 |
| rs1786923  | 10 | 67359195 | C | 0.00486 |
| rs3907196  | 10 | 67555997 | A | 0.00108 |
| rs1911303  | 10 | 67896186 | C | 0.00081 |
| rs10997295 | 10 | 68107621 | T | 0.00208 |
| rs10997544 | 10 | 68599245 | A | 0.01497 |
| rs9415871  | 10 | 68786426 | A | 0.00993 |
| rs12251833 | 10 | 68814645 | A | 0.00610 |
| rs10740277 | 10 | 68848215 | A | 0.01080 |
| rs10997908 | 10 | 69451202 | G | 0.01001 |
| rs10997963 | 10 | 69591909 | A | 0.00735 |
| rs7097776  | 10 | 69605065 | C | 0.01467 |
| rs4746738  | 10 | 69629843 | T | 0.00021 |
| rs10998184 | 10 | 69883970 | T | 0.00881 |



|            |    |          |   |         |
|------------|----|----------|---|---------|
| rs10998185 | 10 | 69884059 | T | 0.00155 |
| rs2457458  | 10 | 69939971 | T | 0.00211 |
| rs1472814  | 10 | 70673618 | G | 0.00232 |
| rs10762276 | 10 | 70722475 | G | 0.01643 |
| rs1227960  | 10 | 70975162 | G | 0.00868 |
| rs3903038  | 10 | 70994937 | A | 0.01249 |
| rs899022   | 10 | 71063502 | A | 0.01104 |
| rs2812498  | 10 | 71089580 | T | 0.01393 |
| rs10999156 | 10 | 71573023 | A | 0.01273 |
| rs7905657  | 10 | 71618793 | G | 0.00935 |
| rs12253651 | 10 | 71779052 | G | 0.01282 |
| rs2688772  | 10 | 72180269 | G | 0.00075 |
| rs10458653 | 10 | 72369768 | A | 0.00469 |
| rs17542297 | 10 | 72444914 | G | 0.00973 |
| rs7911202  | 10 | 72958955 | C | 0.00341 |
| rs4747164  | 10 | 72966441 | C | 0.00557 |
| rs7094357  | 10 | 73126384 | G | 0.01300 |
| rs10999960 | 10 | 73127923 | T | 0.00763 |
| rs11000019 | 10 | 73261536 | A | 0.00089 |
| rs12253630 | 10 | 74438930 | A | 0.00105 |
| rs16930466 | 10 | 74677594 | C | 0.01149 |
| rs2633320  | 10 | 75363312 | A | 0.00214 |
| rs4746196  | 10 | 75749022 | G | 0.00022 |
| rs16931798 | 10 | 76311368 | A | 0.00107 |
| rs4746261  | 10 | 76515638 | C | 0.01177 |
| rs17434565 | 10 | 77276161 | C | 0.01569 |
| rs1998455  | 10 | 77321920 | G | 0.01144 |
| rs12256878 | 10 | 77331129 | T | 0.00729 |
| rs11001571 | 10 | 77432249 | G | 0.00760 |
| rs12416389 | 10 | 78070714 | G | 0.01659 |
| rs1247755  | 10 | 78467676 | G | 0.01401 |
| rs11002078 | 10 | 78632821 | G | 0.00587 |
| rs1468037  | 10 | 79022041 | A | 0.01147 |
| rs2812429  | 10 | 79222683 | G | 0.01348 |
| rs1720300  | 10 | 79688026 | A | 0.00593 |
| rs41385044 | 10 | 79782991 | A | 0.00353 |
| rs11002621 | 10 | 80090444 | T | 0.00263 |
| rs252826   | 10 | 80104652 | T | 0.00779 |
| rs11002745 | 10 | 80370924 | C | 0.00826 |
| rs16936716 | 10 | 80445237 | T | 0.00829 |
| rs2490275  | 10 | 80632417 | T | 0.00391 |
| rs4980054  | 10 | 80691847 | G | 0.00728 |
| rs16937080 | 10 | 80764708 | T | 0.00375 |
| rs2105461  | 10 | 80771685 | G | 0.00232 |

|            |    |          |   |         |
|------------|----|----------|---|---------|
| rs1892498  | 10 | 80773868 | A | 0.00667 |
| rs4246944  | 10 | 80775690 | C | 0.00945 |
| rs12360384 | 10 | 80852808 | A | 0.01634 |
| rs4255480  | 10 | 81725868 | G | 0.00913 |
| rs11201269 | 10 | 81779567 | G | 0.00075 |
| rs4478933  | 10 | 81801652 | C | 0.01023 |
| rs4038156  | 10 | 82310973 | T | 0.01151 |
| rs4934395  | 10 | 82404699 | A | 0.01381 |
| rs3913912  | 10 | 83004141 | A | 0.01017 |
| rs973634   | 10 | 83861304 | T | 0.00894 |
| rs1764094  | 10 | 83978789 | C | 0.00281 |
| rs7071442  | 10 | 84120825 | T | 0.00455 |
| rs17761683 | 10 | 84714402 | C | 0.00226 |
| rs11196923 | 10 | 84773295 | A | 0.00912 |
| rs7898389  | 10 | 85035142 | C | 0.00798 |
| rs10886171 | 10 | 85082226 | C | 0.00469 |
| rs495019   | 10 | 85452087 | T | 0.00123 |
| rs11200762 | 10 | 85720683 | T | 0.00339 |
| rs11200763 | 10 | 85720790 | A | 0.00802 |
| rs7909859  | 10 | 85749135 | T | 0.01612 |
| rs10509488 | 10 | 85766717 | C | 0.00235 |
| rs7903045  | 10 | 85818057 | G | 0.01589 |
| rs11200927 | 10 | 85974424 | C | 0.00928 |
| rs10509493 | 10 | 86093641 | C | 0.01416 |
| rs7924009  | 10 | 87478860 | G | 0.00595 |
| rs2949380  | 10 | 87507487 | C | 0.00572 |
| rs7091796  | 10 | 87512351 | T | 0.00844 |
| rs7913136  | 10 | 88244341 | C | 0.00307 |
| rs41324346 | 10 | 89060725 | T | 0.01031 |
| rs17117244 | 10 | 89421491 | T | 0.00858 |
| rs11202557 | 10 | 89542263 | C | 0.01463 |
| rs10509533 | 10 | 89747929 | A | 0.00414 |
| rs17110348 | 10 | 89996487 | C | 0.01444 |
| rs17113606 | 10 | 90599114 | G | 0.01076 |
| rs12250945 | 10 | 90925186 | G | 0.00345 |
| rs11594137 | 10 | 90965187 | C | 0.01071 |
| rs1556478  | 10 | 90973609 | T | 0.00774 |
| rs7911396  | 10 | 91091595 | G | 0.00052 |
| rs1063943  | 10 | 91334149 | T | 0.00158 |
| rs12771413 | 10 | 91382747 | C | 0.01306 |
| rs11330    | 10 | 91384059 | G | 0.01079 |
| rs12251257 | 10 | 91599612 | T | 0.01303 |
| rs10881695 | 10 | 91602036 | C | 0.00529 |
| rs10509582 | 10 | 91607104 | T | 0.00626 |

|            |    |           |   |         |
|------------|----|-----------|---|---------|
| rs2490311  | 10 | 92246543  | T | 0.01296 |
| rs7917422  | 10 | 92483177  | G | 0.00474 |
| rs10881990 | 10 | 93647416  | G | 0.01190 |
| rs11186792 | 10 | 93756295  | C | 0.00493 |
| rs2185834  | 10 | 93824133  | G | 0.00068 |
| rs17449755 | 10 | 94659511  | T | 0.00087 |
| rs835238   | 10 | 94745188  | T | 0.00011 |
| rs787667   | 10 | 95063036  | T | 0.01145 |
| rs6583900  | 10 | 95366036  | A | 0.01416 |
| rs7084339  | 10 | 96033722  | C | 0.00333 |
| rs10786198 | 10 | 97056288  | A | 0.00682 |
| rs3814150  | 10 | 97061507  | C | 0.01492 |
| rs17110617 | 10 | 97069876  | T | 0.01116 |
| rs7089668  | 10 | 97598412  | A | 0.01015 |
| rs6584099  | 10 | 98546775  | T | 0.01578 |
| rs7080839  | 10 | 98693207  | C | 0.00154 |
| rs4606419  | 10 | 98737104  | A | 0.00172 |
| rs6584123  | 10 | 99122073  | C | 0.00283 |
| rs4917792  | 10 | 99677879  | C | 0.00545 |
| rs4919164  | 10 | 99681340  | G | 0.01004 |
| rs1413618  | 10 | 99878119  | A | 0.01627 |
| rs928579   | 10 | 99878333  | A | 0.01038 |
| rs10748721 | 10 | 99989333  | A | 0.01373 |
| rs3750595  | 10 | 99994896  | T | 0.01293 |
| rs1925636  | 10 | 100047697 | G | 0.00586 |
| rs11189910 | 10 | 100717696 | T | 0.01574 |
| rs7924025  | 10 | 100748309 | G | 0.00539 |
| rs1342580  | 10 | 100862771 | G | 0.01096 |
| rs1954295  | 10 | 100873537 | C | 0.01622 |
| rs10883299 | 10 | 100967599 | G | 0.01060 |
| rs7899146  | 10 | 101047389 | A | 0.00530 |
| rs10786538 | 10 | 101094702 | A | 0.00362 |
| rs4917870  | 10 | 101250354 | A | 0.00621 |
| rs1035210  | 10 | 101335409 | T | 0.01636 |
| rs11190643 | 10 | 102422700 | G | 0.01100 |
| rs10786601 | 10 | 102445505 | T | 0.01304 |
| rs7082923  | 10 | 102458016 | G | 0.01457 |
| rs7090429  | 10 | 102766388 | G | 0.00711 |
| rs7099531  | 10 | 102819186 | T | 0.00154 |
| rs11190913 | 10 | 103049028 | C | 0.00933 |
| rs10883648 | 10 | 103175171 | A | 0.00864 |
| rs4244350  | 10 | 103998741 | T | 0.00413 |
| rs812799   | 10 | 104026345 | C | 0.00699 |
| rs772021   | 10 | 104026439 | A | 0.01230 |

|            |    |           |   |         |
|------------|----|-----------|---|---------|
| rs3781287  | 10 | 104585410 | C | 0.01121 |
| rs10883826 | 10 | 104820809 | G | 0.00056 |
| rs1570220  | 10 | 105551877 | T | 0.00346 |
| rs7902587  | 10 | 105684291 | A | 0.01115 |
| rs156699   | 10 | 106043631 | C | 0.01444 |
| rs10491046 | 10 | 106060991 | G | 0.00113 |
| rs10883991 | 10 | 106067576 | T | 0.00941 |
| rs11192008 | 10 | 106079416 | A | 0.00939 |
| rs276214   | 10 | 106080777 | G | 0.00859 |
| rs867626   | 10 | 106427223 | A | 0.00947 |
| rs1349625  | 10 | 106820917 | G | 0.00917 |
| rs11192321 | 10 | 106862575 | T | 0.00960 |
| rs10884103 | 10 | 106887944 | C | 0.01615 |
| rs7906336  | 10 | 107064722 | C | 0.00220 |
| rs6584676  | 10 | 107137682 | A | 0.01368 |
| rs876183   | 10 | 107467567 | C | 0.01022 |
| rs903799   | 10 | 107689216 | A | 0.00673 |
| rs550165   | 10 | 107690209 | A | 0.00343 |
| rs11192739 | 10 | 107908905 | T | 0.00021 |
| rs10884268 | 10 | 107938899 | T | 0.01595 |
| rs821693   | 10 | 108110180 | A | 0.00788 |
| rs12773375 | 10 | 108124091 | T | 0.00429 |
| rs7088535  | 10 | 108288081 | A | 0.00992 |
| rs17121023 | 10 | 108342175 | A | 0.00578 |
| rs11817663 | 10 | 108354299 | A | 0.00626 |
| rs821925   | 10 | 108432009 | C | 0.00894 |
| rs821958   | 10 | 108445133 | C | 0.01153 |
| rs7099998  | 10 | 108918548 | C | 0.01300 |
| rs7082331  | 10 | 108918701 | T | 0.00640 |
| rs10884426 | 10 | 108918890 | G | 0.00395 |
| rs1822155  | 10 | 109347069 | T | 0.00435 |
| rs2418979  | 10 | 109527084 | C | 0.00746 |
| rs17227554 | 10 | 109571175 | G | 0.01386 |
| rs17325365 | 10 | 109571479 | G | 0.00909 |
| rs2551821  | 10 | 109582725 | T | 0.01508 |
| rs317442   | 10 | 109930822 | T | 0.01036 |
| rs161016   | 10 | 110029605 | T | 0.00357 |
| rs11194050 | 10 | 110120004 | T | 0.01094 |
| rs17124681 | 10 | 110253292 | A | 0.01422 |
| rs2039385  | 10 | 110344709 | A | 0.01178 |
| rs1332260  | 10 | 110366810 | C | 0.01568 |
| rs12412977 | 10 | 110384900 | T | 0.01310 |
| rs17783561 | 10 | 110961425 | A | 0.00545 |
| rs10884712 | 10 | 110970055 | A | 0.00513 |

|            |    |           |   |          |
|------------|----|-----------|---|----------|
| rs3888122  | 10 | 110994544 | C | 0.01313  |
| rs11194511 | 10 | 110998503 | C | 0.00281  |
| rs830062   | 10 | 111021967 | A | 0.01335  |
| rs11194562 | 10 | 111084275 | A | 0.00319  |
| rs7920353  | 10 | 111103117 | C | 0.00111  |
| rs612155   | 10 | 111620721 | G | 0.00479  |
| rs944966   | 10 | 111648324 | G | 0.00090  |
| rs12768489 | 10 | 111699868 | A | 0.01399  |
| rs10884954 | 10 | 112121472 | T | 0.00749  |
| rs4918508  | 10 | 112144100 | A | 0.00436  |
| rs4918546  | 10 | 112384883 | C | 0.00280  |
| rs7906643  | 10 | 112535484 | A | 0.01601  |
| rs12245104 | 10 | 112876728 | T | 0.01292  |
| rs10509936 | 10 | 113026683 | C | 0.00692  |
| rs10749065 | 10 | 113030534 | G | 0.01591  |
| rs10885262 | 10 | 113520074 | C | 0.00475  |
| rs11195730 | 10 | 113547792 | A | 0.00891  |
| rs11195768 | 10 | 113709954 | C | 0.01226  |
| rs10509959 | 10 | 114045499 | G | 0.00997  |
| rs1887136  | 10 | 114065189 | T | 0.00375  |
| rs7087000  | 10 | 114092662 | G | 0.01392  |
| rs11195939 | 10 | 114132094 | T | 0.01176  |
| rs2306158  | 10 | 114182275 | C | 0.01056  |
| rs12268627 | 10 | 114332265 | C | 0.01076  |
| rs12254159 | 10 | 114332350 | A | 0.00782  |
| rs4132670  | 10 | 114757761 | G | 0.00767  |
| rs12243326 | 10 | 114778805 | A | 0.01136  |
| rs2788175  | 10 | 115051438 | A | 0.00137  |
| rs3127098  | 10 | 115387123 | C | 0.01580  |
| rs2227310  | 10 | 115479142 | C | 0.00371  |
| rs2419879  | 10 | 115512165 | T | 0.01579  |
| rs7071578  | 10 | 115533315 | C | 0.01160  |
| rs11197072 | 10 | 116876309 | C | 0.00649  |
| rs17093112 | 10 | 117214465 | A | 18.95600 |
| rs2804235  | 10 | 117368593 | C | 0.00859  |
| rs12219110 | 10 | 117417474 | C | 0.00007  |
| rs10490919 | 10 | 117502578 | A | 0.01389  |
| rs7070267  | 10 | 117853324 | C | 0.01212  |
| rs2532681  | 10 | 118039749 | C | 0.00441  |
| rs11197640 | 10 | 118121372 | C | 0.00075  |
| rs3781566  | 10 | 118638831 | A | 0.00981  |
| rs7094283  | 10 | 118808539 | G | 0.00014  |
| rs10787753 | 10 | 118819674 | G | 0.00481  |
| rs3847483  | 10 | 118949003 | T | 0.01339  |

|            |    |           |   |         |
|------------|----|-----------|---|---------|
| rs3858335  | 10 | 118963135 | A | 0.01416 |
| rs17095891 | 10 | 118963546 | T | 0.00461 |
| rs363226   | 10 | 119015202 | G | 0.00910 |
| rs181628   | 10 | 119354660 | C | 0.00782 |
| rs10886156 | 10 | 119599068 | G | 0.01192 |
| rs2928119  | 10 | 119783607 | G | 0.00423 |
| rs7921175  | 10 | 119981748 | G | 0.00378 |
| rs611959   | 10 | 120653901 | C | 0.00122 |
| rs17099075 | 10 | 121352777 | G | 0.00372 |
| rs11199250 | 10 | 122014524 | G | 0.00233 |
| rs10886674 | 10 | 122116262 | G | 0.00221 |
| rs2463134  | 10 | 122193457 | G | 0.00665 |
| rs978854   | 10 | 122292028 | A | 0.00082 |
| rs7913157  | 10 | 122342430 | A | 0.00074 |
| rs2420789  | 10 | 122343706 | G | 0.01578 |
| rs11199499 | 10 | 122441198 | A | 0.00963 |
| rs11199540 | 10 | 122520834 | G | 0.01139 |
| rs2997307  | 10 | 122551064 | T | 0.00468 |
| rs7901805  | 10 | 122561412 | A | 0.00279 |
| rs10788134 | 10 | 122706857 | C | 0.01280 |
| rs17510577 | 10 | 122712496 | A | 0.00248 |
| rs7911360  | 10 | 122795537 | T | 0.01660 |
| rs7899480  | 10 | 122993625 | G | 0.00573 |
| rs7899611  | 10 | 122993679 | C | 0.00325 |
| rs11199860 | 10 | 123011023 | C | 0.01500 |
| rs10788165 | 10 | 123034204 | C | 0.00794 |
| rs7913694  | 10 | 123085176 | T | 0.00268 |
| rs2420929  | 10 | 123143166 | C | 0.01642 |
| rs2912753  | 10 | 123247392 | T | 0.00049 |
| rs7068354  | 10 | 123400930 | T | 0.00535 |
| rs3862129  | 10 | 123573965 | G | 0.00517 |
| rs11200257 | 10 | 123666737 | T | 0.01527 |
| rs11200277 | 10 | 123693800 | G | 0.00695 |
| rs7906271  | 10 | 123697712 | C | 0.00601 |
| rs10887032 | 10 | 123705392 | C | 0.00093 |
| rs11200440 | 10 | 123908165 | T | 0.01163 |
| rs10887101 | 10 | 123948795 | C | 0.00951 |
| rs1885512  | 10 | 124019426 | G | 0.00781 |
| rs1998345  | 10 | 124114296 | G | 0.00071 |
| rs11200640 | 10 | 124214077 | G | 0.00635 |
| rs4638251  | 10 | 124628817 | G | 0.01305 |
| rs10794589 | 10 | 124823720 | A | 0.00272 |
| rs11248390 | 10 | 124841532 | A | 0.00291 |
| rs913524   | 10 | 125074629 | T | 0.01215 |

|            |    |           |   |         |
|------------|----|-----------|---|---------|
| rs6599688  | 10 | 125088556 | G | 0.01087 |
| rs1887821  | 10 | 125104041 | C | 0.01058 |
| rs845076   | 10 | 125169174 | G | 0.01040 |
| rs11592288 | 10 | 125300489 | T | 0.00118 |
| rs7908279  | 10 | 125300650 | T | 0.00207 |
| rs1710960  | 10 | 125322821 | G | 0.00831 |
| rs7084727  | 10 | 125441198 | A | 0.01610 |
| rs1896392  | 10 | 125516679 | A | 0.00016 |
| rs7099115  | 10 | 126158000 | C | 0.01065 |
| rs7086481  | 10 | 126834513 | T | 0.00176 |
| rs10794001 | 10 | 127166639 | A | 0.00757 |
| rs9422941  | 10 | 127362741 | A | 0.01466 |
| rs9804381  | 10 | 127400272 | A | 0.00012 |
| rs6597725  | 10 | 127409227 | A | 0.00676 |
| rs7898112  | 10 | 127622475 | A | 0.00480 |
| rs11244772 | 10 | 127701286 | G | 0.01573 |
| rs2290842  | 10 | 127776959 | A | 0.00419 |
| rs1674919  | 10 | 127836118 | A | 0.01660 |
| rs10901564 | 10 | 127908604 | G | 0.00781 |
| rs1025641  | 10 | 128297182 | C | 0.01189 |
| rs17155051 | 10 | 128300416 | A | 4.22500 |
| rs7908838  | 10 | 128380793 | T | 0.00540 |
| rs10901734 | 10 | 128544642 | A | 0.00410 |
| rs1931744  | 10 | 129218811 | G | 0.00384 |
| rs4080381  | 10 | 129240631 | A | 0.00548 |
| rs4750910  | 10 | 129421165 | T | 0.01060 |
| rs2148895  | 10 | 129582283 | A | 0.01071 |
| rs11018411 | 10 | 129636049 | C | 0.01581 |
| rs2096285  | 10 | 129769690 | C | 0.00900 |
| rs10764747 | 10 | 129778717 | C | 0.01109 |
| rs11016137 | 10 | 129920175 | G | 0.00053 |
| rs10829385 | 10 | 130034129 | C | 0.01585 |
| rs7923707  | 10 | 130057287 | C | 0.01617 |
| rs7915042  | 10 | 130104355 | G | 0.00243 |
| rs748309   | 10 | 130346934 | A | 0.00684 |
| rs11016473 | 10 | 130450043 | T | 0.00532 |
| rs4751013  | 10 | 130529288 | A | 0.01498 |
| rs16908896 | 10 | 130690756 | A | 0.00438 |
| rs10764876 | 10 | 131016364 | G | 0.01236 |
| rs945226   | 10 | 131239246 | A | 0.00740 |
| rs4751111  | 10 | 131392985 | C | 0.00162 |
| rs4751158  | 10 | 131700143 | A | 0.00156 |
| rs10764939 | 10 | 131881129 | G | 0.00197 |
| rs16910188 | 10 | 131881171 | T | 0.01549 |

|            |    |           |   |          |
|------------|----|-----------|---|----------|
| rs1410906  | 10 | 131897272 | C | 0.00298  |
| rs431131   | 10 | 132068996 | C | 0.00353  |
| rs7084067  | 10 | 132069411 | C | 0.00376  |
| rs411620   | 10 | 132071257 | T | 0.00361  |
| rs359058   | 10 | 132108798 | A | 0.01143  |
| rs880832   | 10 | 132118628 | A | 0.00183  |
| rs400803   | 10 | 132160832 | G | 0.01591  |
| rs431690   | 10 | 132160885 | C | 0.01557  |
| rs11017270 | 10 | 132165808 | A | 0.00775  |
| rs402807   | 10 | 132173058 | G | 0.00934  |
| rs426715   | 10 | 132177561 | G | 0.01531  |
| rs10764960 | 10 | 132187763 | C | 0.01617  |
| rs4751217  | 10 | 132205806 | T | 12.84700 |
| rs6482809  | 10 | 132206587 | G | 18.82800 |
| rs7911511  | 10 | 132215151 | A | 0.00408  |
| rs11597303 | 10 | 132263195 | A | 0.01439  |
| rs1176410  | 10 | 132463528 | T | 0.01087  |
| rs10764994 | 10 | 132550279 | A | 0.00352  |
| rs1655156  | 10 | 132565500 | C | 0.01409  |
| rs4751296  | 10 | 132578074 | T | 0.00157  |
| rs7074195  | 10 | 132611226 | C | 0.00917  |
| rs2397738  | 10 | 132628747 | T | 0.00728  |
| rs892322   | 10 | 132630798 | C | 0.00169  |
| rs10829854 | 10 | 132641908 | T | 0.01621  |
| rs11017622 | 10 | 132661360 | T | 0.00247  |
| rs11017623 | 10 | 132661446 | C | 0.00217  |
| rs10458719 | 10 | 132704704 | C | 0.00124  |
| rs12245418 | 10 | 132774327 | G | 0.00283  |
| rs10829909 | 10 | 132818897 | G | 0.01553  |
| rs7075041  | 10 | 132884640 | G | 0.00547  |
| rs2918126  | 10 | 132894396 | G | 0.00494  |
| rs11594412 | 10 | 133033946 | G | 0.00303  |
| rs10765092 | 10 | 133250389 | C | 0.00897  |
| rs7074167  | 10 | 133251032 | G | 0.01062  |
| rs11599194 | 10 | 133346672 | A | 0.00359  |
| rs4388799  | 10 | 133389715 | A | 0.01155  |
| rs9418987  | 10 | 135174399 | G | 0.00105  |
| rs7924341  | 11 | 430343    | C | 0.00088  |
| rs11246342 | 11 | 896708    | G | 0.00670  |
| rs10794281 | 11 | 1053149   | G | 0.01456  |
| rs4881740  | 11 | 1476557   | T | 0.00514  |
| rs17834326 | 11 | 1708562   | T | 0.01010  |
| rs498337   | 11 | 1811147   | T | 0.00034  |
| rs4930030  | 11 | 2043796   | A | 0.01332  |



|            |    |          |   |         |
|------------|----|----------|---|---------|
| rs179409   | 11 | 2483882  | C | 0.01546 |
| rs2237866  | 11 | 2486738  | C | 0.01069 |
| rs4758587  | 11 | 3376078  | G | 0.01095 |
| rs2672215  | 11 | 3648225  | A | 0.01386 |
| rs2672216  | 11 | 3648600  | G | 0.01173 |
| rs10836005 | 11 | 4374063  | A | 0.00654 |
| rs2566269  | 11 | 4525601  | T | 0.00478 |
| rs2641404  | 11 | 4534717  | C | 0.01211 |
| rs17227484 | 11 | 4750458  | A | 0.00847 |
| rs11034685 | 11 | 4902921  | T | 0.01122 |
| rs12282135 | 11 | 5072704  | G | 0.00585 |
| rs11035648 | 11 | 5073531  | C | 0.01152 |
| rs10734485 | 11 | 5145420  | A | 0.00118 |
| rs10742553 | 11 | 5145512  | A | 0.00078 |
| rs11602279 | 11 | 5166168  | T | 0.01308 |
| rs16930808 | 11 | 5407670  | G | 0.00152 |
| rs2133258  | 11 | 5723239  | C | 0.00929 |
| rs4388914  | 11 | 5824164  | C | 0.01304 |
| rs4628655  | 11 | 6151051  | A | 0.01166 |
| rs2067022  | 11 | 6716101  | C | 0.00115 |
| rs7947196  | 11 | 6749489  | C | 0.01571 |
| rs10839617 | 11 | 6749646  | C | 0.00332 |
| rs10839628 | 11 | 6826194  | G | 0.00595 |
| rs2741774  | 11 | 6840789  | C | 0.00486 |
| rs10839695 | 11 | 7010743  | G | 0.00074 |
| rs766497   | 11 | 7214147  | C | 0.01474 |
| rs10839781 | 11 | 7403545  | T | 0.00099 |
| rs10839814 | 11 | 7545167  | T | 0.01256 |
| rs4372441  | 11 | 7613835  | G | 0.01151 |
| rs11041504 | 11 | 7632155  | A | 0.00652 |
| rs4758330  | 11 | 8285769  | A | 0.01569 |
| rs10840120 | 11 | 8758194  | T | 0.01209 |
| rs3763904  | 11 | 9031596  | T | 0.00618 |
| rs7127387  | 11 | 9038237  | C | 0.01598 |
| rs397686   | 11 | 9706221  | C | 0.00677 |
| rs7120754  | 11 | 9755312  | A | 0.01638 |
| rs360124   | 11 | 9758804  | C | 0.00966 |
| rs1546542  | 11 | 9857034  | T | 0.01133 |
| rs17294693 | 11 | 10189289 | C | 0.01375 |
| rs11601268 | 11 | 10473410 | A | 0.00690 |
| rs41464450 | 11 | 10558098 | G | 0.01599 |
| rs10840501 | 11 | 10830511 | G | 0.01310 |
| rs1872696  | 11 | 10967280 | T | 0.00935 |
| rs1386152  | 11 | 10986547 | T | 0.00934 |

|            |    |          |   |         |
|------------|----|----------|---|---------|
| rs10500737 | 11 | 11002835 | G | 0.01569 |
| rs17429624 | 11 | 11082825 | C | 0.01350 |
| rs4296033  | 11 | 11512829 | A | 0.00538 |
| rs7121652  | 11 | 11547422 | A | 0.01017 |
| rs1455252  | 11 | 11710726 | G | 0.00750 |
| rs8169     | 11 | 11941430 | T | 0.00357 |
| rs10741565 | 11 | 11969776 | A | 0.00243 |
| rs2172469  | 11 | 12001084 | C | 0.01179 |
| rs6485494  | 11 | 12105716 | G | 0.00224 |
| rs4644628  | 11 | 12125877 | C | 0.01033 |
| rs16911154 | 11 | 12330256 | C | 0.00475 |
| rs16911159 | 11 | 12330765 | G | 0.00338 |
| rs11022394 | 11 | 12508937 | C | 0.01147 |
| rs12292638 | 11 | 12581803 | A | 0.01038 |
| rs16911719 | 11 | 12872809 | G | 0.00766 |
| rs12276434 | 11 | 12956732 | C | 0.00659 |
| rs10500770 | 11 | 13053050 | T | 0.01216 |
| rs2165484  | 11 | 13056122 | T | 0.00411 |
| rs11022636 | 11 | 13057878 | T | 0.00144 |
| rs2583136  | 11 | 13059500 | T | 0.00348 |
| rs4451711  | 11 | 13077526 | C | 0.00110 |
| rs3849154  | 11 | 13081100 | C | 0.00327 |
| rs3849161  | 11 | 13138194 | A | 0.00865 |
| rs2593579  | 11 | 13435415 | A | 0.01658 |
| rs10500785 | 11 | 13530459 | A | 0.01043 |
| rs11022899 | 11 | 13578990 | A | 0.00801 |
| rs10832081 | 11 | 13581879 | C | 0.00813 |
| rs12420514 | 11 | 13616373 | A | 0.01559 |
| rs12786409 | 11 | 13625777 | T | 0.01630 |
| rs4471396  | 11 | 13891504 | G | 0.00939 |
| rs10766122 | 11 | 13910145 | A | 0.01630 |
| rs11821106 | 11 | 14029178 | T | 0.00512 |
| rs7131289  | 11 | 14034447 | G | 0.01331 |
| rs11023437 | 11 | 15086889 | C | 0.00261 |
| rs11023472 | 11 | 15196467 | C | 0.01060 |
| rs1714336  | 11 | 15201694 | A | 0.01641 |
| rs10832454 | 11 | 15475924 | A | 0.00815 |
| rs2351097  | 11 | 15516762 | G | 0.01542 |
| rs12578054 | 11 | 15613167 | T | 0.00564 |
| rs11827785 | 11 | 15687087 | C | 0.01346 |
| rs16931985 | 11 | 15747400 | A | 0.00609 |
| rs11023757 | 11 | 15858795 | G | 0.00345 |
| rs2615016  | 11 | 15909119 | C | 0.01085 |
| rs10832554 | 11 | 16148859 | G | 0.00736 |

|            |    |          |   |         |
|------------|----|----------|---|---------|
| rs297325   | 11 | 16346170 | T | 0.01016 |
| rs1847315  | 11 | 16365152 | T | 0.00910 |
| rs12221729 | 11 | 16389040 | C | 0.01024 |
| rs7932807  | 11 | 16394987 | G | 0.00987 |
| rs10500830 | 11 | 16441827 | G | 0.01535 |
| rs4325274  | 11 | 16580482 | C | 0.00708 |
| rs4756858  | 11 | 16626773 | T | 0.00548 |
| rs12577088 | 11 | 16820873 | G | 0.00165 |
| rs11024074 | 11 | 16873795 | T | 0.00585 |
| rs10766360 | 11 | 16926330 | A | 0.00260 |
| rs2883150  | 11 | 16931362 | G | 0.00869 |
| rs4757484  | 11 | 16982316 | C | 0.00041 |
| rs7947297  | 11 | 16984904 | G | 0.00388 |
| rs7933984  | 11 | 16985321 | T | 0.01568 |
| rs10832733 | 11 | 17067848 | A | 0.01235 |
| rs7110037  | 11 | 17337608 | G | 0.00020 |
| rs2190454  | 11 | 17490211 | T | 0.00323 |
| rs7101870  | 11 | 17681539 | T | 0.00802 |
| rs2445206  | 11 | 18134918 | A | 0.01221 |
| rs11024502 | 11 | 18135024 | A | 0.01151 |
| rs10832896 | 11 | 18153416 | A | 0.00251 |
| rs2468772  | 11 | 18156255 | A | 0.00610 |
| rs2445174  | 11 | 18220412 | C | 0.00899 |
| rs11024757 | 11 | 18649263 | T | 0.00664 |
| rs1962511  | 11 | 19077252 | T | 0.00568 |
| rs10833134 | 11 | 19584103 | G | 0.00190 |
| rs12574517 | 11 | 19644968 | C | 0.00780 |
| rs7927862  | 11 | 19647564 | C | 0.00009 |
| rs16937251 | 11 | 19911770 | G | 0.00492 |
| rs2568118  | 11 | 19962028 | T | 0.00008 |
| rs7120486  | 11 | 20836106 | T | 0.01610 |
| rs9633845  | 11 | 21042666 | C | 0.01600 |
| rs1945334  | 11 | 21784474 | C | 0.01198 |
| rs16908613 | 11 | 21807233 | A | 0.01282 |
| rs1009809  | 11 | 21818153 | G | 0.01484 |
| rs428209   | 11 | 21981697 | C | 0.01114 |
| rs1379649  | 11 | 21982053 | A | 0.01554 |
| rs10766916 | 11 | 22056773 | A | 0.01599 |
| rs12278342 | 11 | 22840459 | G | 0.00124 |
| rs2429772  | 11 | 22863000 | A | 0.00155 |
| rs2429752  | 11 | 22875997 | T | 2.19200 |
| rs2403793  | 11 | 22957547 | A | 0.01100 |
| rs7112339  | 11 | 23169551 | C | 0.01080 |
| rs1600957  | 11 | 23180811 | T | 0.00904 |

|            |    |          |   |         |
|------------|----|----------|---|---------|
| rs1482735  | 11 | 23192822 | C | 0.00552 |
| rs11027195 | 11 | 23369209 | T | 0.01265 |
| rs2403952  | 11 | 24458489 | A | 0.00005 |
| rs16913066 | 11 | 24680874 | T | 0.00153 |
| rs2716548  | 11 | 24734687 | G | 0.00622 |
| rs1486698  | 11 | 24758224 | G | 0.00312 |
| rs1838773  | 11 | 25045288 | T | 0.00130 |
| rs11028415 | 11 | 25070842 | A | 0.00421 |
| rs2404026  | 11 | 25109057 | A | 0.01223 |
| rs10742069 | 11 | 25143560 | A | 0.00357 |
| rs7107300  | 11 | 25143952 | A | 0.00880 |
| rs2059541  | 11 | 25273068 | C | 0.01013 |
| rs17242433 | 11 | 25581002 | C | 0.00747 |
| rs17242489 | 11 | 25603897 | C | 0.00974 |
| rs11028885 | 11 | 25714362 | A | 0.00319 |
| rs1389421  | 11 | 25747721 | G | 0.01082 |
| rs17242747 | 11 | 25840913 | C | 0.01295 |
| rs7943568  | 11 | 25862285 | T | 0.01277 |
| rs10834856 | 11 | 25909353 | C | 0.01193 |
| rs1441486  | 11 | 25909416 | T | 0.00255 |
| rs16914910 | 11 | 25910098 | C | 0.00477 |
| rs380170   | 11 | 26531206 | C | 0.00196 |
| rs4532991  | 11 | 27089107 | C | 0.00079 |
| rs920698   | 11 | 27151203 | T | 0.01599 |
| rs7938462  | 11 | 27154937 | C | 0.01239 |
| rs11029891 | 11 | 27225055 | T | 0.01200 |
| rs1488831  | 11 | 27593590 | T | 0.00043 |
| rs10835218 | 11 | 27736226 | G | 0.01048 |
| rs2582898  | 11 | 28447264 | C | 0.00564 |
| rs11030810 | 11 | 29751547 | G | 0.00081 |
| rs559877   | 11 | 30490141 | G | 0.00449 |
| rs10835683 | 11 | 30511777 | A | 0.00097 |
| rs208102   | 11 | 31124115 | G | 0.00107 |
| rs1806156  | 11 | 31796992 | A | 0.00999 |
| rs11031526 | 11 | 31878381 | G | 0.01386 |
| rs11031557 | 11 | 32009995 | T | 0.00175 |
| rs11031630 | 11 | 32153509 | T | 0.01647 |
| rs5030310  | 11 | 32367816 | T | 0.01158 |
| rs201879   | 11 | 32565979 | G | 0.01551 |
| rs201905   | 11 | 32595768 | C | 0.00439 |
| rs11031940 | 11 | 32676726 | A | 0.00314 |
| rs1486582  | 11 | 32680449 | G | 9.91100 |
| rs9943472  | 11 | 32730565 | G | 0.00043 |
| rs7102857  | 11 | 32779010 | G | 0.01504 |

|            |    |          |   |         |
|------------|----|----------|---|---------|
| rs2615923  | 11 | 33351118 | T | 0.01099 |
| rs10501129 | 11 | 33376740 | G | 0.00072 |
| rs4756683  | 11 | 33400163 | A | 0.00994 |
| rs2756289  | 11 | 33494074 | A | 0.00049 |
| rs1402953  | 11 | 33727790 | C | 0.00825 |
| rs11032380 | 11 | 33757109 | T | 0.01355 |
| rs2473929  | 11 | 34130872 | T | 0.00471 |
| rs2955948  | 11 | 34210736 | C | 0.00034 |
| rs7934463  | 11 | 34388230 | A | 0.00279 |
| rs11032695 | 11 | 34404162 | A | 0.00534 |
| rs11032839 | 11 | 34734301 | G | 0.01355 |
| rs7122374  | 11 | 35219600 | G | 0.01510 |
| rs3763889  | 11 | 35263469 | G | 0.00055 |
| rs41352148 | 11 | 35266112 | A | 0.00186 |
| rs11033099 | 11 | 35345354 | C | 0.00650 |
| rs7116961  | 11 | 35348844 | C | 0.01110 |
| rs601295   | 11 | 35481696 | A | 0.01640 |
| rs597762   | 11 | 35482454 | C | 0.01516 |
| rs755727   | 11 | 36014659 | A | 0.00684 |
| rs996977   | 11 | 37088830 | C | 0.01156 |
| rs2662213  | 11 | 37106373 | A | 0.01440 |
| rs7108991  | 11 | 37263661 | A | 0.00217 |
| rs7121356  | 11 | 37545471 | T | 0.01037 |
| rs7946111  | 11 | 37604433 | T | 0.01023 |
| rs7125108  | 11 | 39619446 | G | 0.01450 |
| rs10501217 | 11 | 40048945 | C | 0.00837 |
| rs4429048  | 11 | 40149102 | A | 0.00941 |
| rs1452475  | 11 | 40209482 | C | 0.00859 |
| rs10734480 | 11 | 40241419 | T | 0.00692 |
| rs1353354  | 11 | 40542692 | G | 0.01425 |
| rs10837436 | 11 | 40542978 | G | 0.00932 |
| rs11035930 | 11 | 40543235 | G | 0.00683 |
| rs4756605  | 11 | 40572021 | A | 0.00167 |
| rs11036020 | 11 | 40667334 | G | 0.00767 |
| rs11036035 | 11 | 40693286 | T | 0.01487 |
| rs3226     | 11 | 40839047 | G | 0.00846 |
| rs16935255 | 11 | 40980714 | T | 0.01456 |
| rs10742570 | 11 | 41000401 | T | 0.01374 |
| rs4631866  | 11 | 41014153 | A | 0.00389 |
| rs996263   | 11 | 41016901 | T | 0.00443 |
| rs11036358 | 11 | 41304985 | G | 0.00226 |
| rs11036825 | 11 | 42285325 | T | 0.00772 |
| rs4424659  | 11 | 42302576 | G | 0.00279 |
| rs10768795 | 11 | 42307623 | G | 0.00901 |

|            |    |          |   |         |
|------------|----|----------|---|---------|
| rs7342195  | 11 | 42846760 | A | 0.01262 |
| rs2067048  | 11 | 43116209 | A | 0.00259 |
| rs2114089  | 11 | 43153254 | G | 0.01279 |
| rs17509794 | 11 | 43436750 | A | 0.00191 |
| rs11602193 | 11 | 43464732 | T | 0.01175 |
| rs546614   | 11 | 43940549 | A | 0.00452 |
| rs11037868 | 11 | 44091183 | T | 0.00242 |
| rs10838236 | 11 | 44098426 | G | 0.00256 |
| rs4755782  | 11 | 44124572 | G | 0.00977 |
| rs1390073  | 11 | 44167215 | C | 0.00339 |
| rs10501305 | 11 | 44476554 | T | 0.00914 |
| rs4755885  | 11 | 44725608 | G | 0.00061 |
| rs861354   | 11 | 44830108 | G | 0.01151 |
| rs1466199  | 11 | 44843130 | T | 0.01058 |
| rs10838382 | 11 | 44877202 | C | 0.01042 |
| rs10769107 | 11 | 45010828 | G | 0.01214 |
| rs2863172  | 11 | 45217918 | T | 0.00775 |
| rs4755941  | 11 | 45224291 | T | 0.00213 |
| rs6416130  | 11 | 45233558 | T | 0.00764 |
| rs4237652  | 11 | 45236863 | G | 0.00976 |
| rs4755967  | 11 | 45296644 | G | 0.00013 |
| rs896337   | 11 | 45443807 | A | 0.01550 |
| rs2037311  | 11 | 45830024 | G | 0.00589 |
| rs9300053  | 11 | 45835452 | C | 0.00373 |
| rs12281674 | 11 | 45856538 | G | 0.00746 |
| rs1996573  | 11 | 45931219 | G | 0.00606 |
| rs11038752 | 11 | 46029113 | A | 0.01249 |
| rs2932515  | 11 | 46062264 | A | 0.00518 |
| rs11600292 | 11 | 46915274 | G | 0.00891 |
| rs10769255 | 11 | 47323947 | T | 0.00956 |
| rs17789481 | 11 | 48066619 | G | 0.01174 |
| rs1503168  | 11 | 48229272 | A | 0.00498 |
| rs12365014 | 11 | 48586010 | C | 0.01130 |
| rs1847639  | 11 | 48960517 | C | 0.00960 |
| rs17815807 | 11 | 49154124 | A | 0.00107 |
| rs3960835  | 11 | 49283110 | C | 0.00954 |
| rs17489472 | 11 | 50103012 | C | 0.00920 |
| rs1364762  | 11 | 54954489 | A | 0.00389 |
| rs17494536 | 11 | 55017848 | T | 0.00936 |
| rs7115527  | 11 | 55025431 | A | 0.01028 |
| rs9666744  | 11 | 55033178 | C | 0.00438 |
| rs11828054 | 11 | 55054138 | G | 0.01256 |
| rs17580694 | 11 | 55060775 | G | 0.01218 |
| rs9943519  | 11 | 55235453 | C | 0.01198 |

|            |    |          |   |          |
|------------|----|----------|---|----------|
| rs2127230  | 11 | 55253465 | T | 0.00793  |
| rs10897182 | 11 | 55264743 | A | 0.00591  |
| rs12098903 | 11 | 55423089 | T | 0.00272  |
| rs17596143 | 11 | 55434921 | T | 0.00495  |
| rs17148897 | 11 | 55439287 | T | 0.01119  |
| rs17598094 | 11 | 55465391 | C | 0.00437  |
| rs17602278 | 11 | 55605691 | C | 10.41000 |
| rs17530228 | 11 | 55605732 | C | 0.00478  |
| rs17530318 | 11 | 55607598 | T | 0.00458  |
| rs7943453  | 11 | 55616001 | T | 0.01105  |
| rs10750820 | 11 | 55905598 | C | 0.00933  |
| rs11228676 | 11 | 56126682 | T | 0.00899  |
| rs530547   | 11 | 56286186 | T | 0.01102  |
| rs11228775 | 11 | 56298572 | A | 0.00383  |
| rs12272961 | 11 | 56438326 | A | 0.01228  |
| rs1793426  | 11 | 56440326 | G | 0.01651  |
| rs2903267  | 11 | 56713092 | T | 0.00738  |
| rs1943489  | 11 | 56713994 | G | 0.01187  |
| rs518272   | 11 | 56774133 | C | 0.01160  |
| rs10896597 | 11 | 56791325 | A | 0.00762  |
| rs549630   | 11 | 56925282 | C | 0.01180  |
| rs96894    | 11 | 57405819 | G | 0.01549  |
| rs4127345  | 11 | 57812866 | C | 0.00340  |
| rs4529896  | 11 | 57885744 | C | 0.00243  |
| rs11229433 | 11 | 57941912 | T | 0.00433  |
| rs17154146 | 11 | 59300834 | A | 0.00245  |
| rs529933   | 11 | 59530245 | A | 0.00971  |
| rs1303621  | 11 | 59647250 | G | 0.00646  |
| rs650853   | 11 | 59763277 | C | 0.01207  |
| rs2233244  | 11 | 59909107 | T | 0.00740  |
| rs11230420 | 11 | 60120537 | C | 0.00639  |
| rs12280505 | 11 | 60140043 | C | 0.00024  |
| rs2957229  | 11 | 60340498 | A | 0.01450  |
| rs565679   | 11 | 60342231 | C | 0.01387  |
| rs593315   | 11 | 60342652 | T | 0.00717  |
| rs10897118 | 11 | 60352415 | T | 0.00296  |
| rs582246   | 11 | 60360223 | C | 0.01204  |
| rs9667807  | 11 | 60484274 | C | 0.00344  |
| rs2845573  | 11 | 61358484 | C | 0.01601  |
| rs2463829  | 11 | 61845414 | T | 0.01642  |
| rs3110504  | 11 | 61930970 | T | 0.00147  |
| rs1186941  | 11 | 63261225 | T | 0.01131  |
| rs35079323 | 11 | 64425681 | C | 0.01285  |
| rs907629   | 11 | 64596273 | T | 0.01135  |

|            |    |          |   |         |
|------------|----|----------|---|---------|
| rs508375   | 11 | 64605528 | G | 0.00055 |
| rs1193496  | 11 | 65294132 | T | 0.00024 |
| rs4930346  | 11 | 65750255 | C | 0.00970 |
| rs2075626  | 11 | 67556502 | G | 0.00784 |
| rs2123763  | 11 | 68656337 | G | 0.00415 |
| rs4980635  | 11 | 68976688 | C | 0.01153 |
| rs587903   | 11 | 69030054 | T | 0.01542 |
| rs4522197  | 11 | 69258982 | A | 0.00873 |
| rs10459038 | 11 | 70524609 | C | 0.00931 |
| rs17433007 | 11 | 70717451 | G | 0.00386 |
| rs10897995 | 11 | 70729463 | G | 0.01094 |
| rs11234248 | 11 | 70964187 | G | 0.00132 |
| rs12421579 | 11 | 70969138 | A | 0.01643 |
| rs7113974  | 11 | 71303737 | A | 0.00586 |
| rs1939243  | 11 | 71420383 | G | 0.01366 |
| rs4945426  | 11 | 71425794 | C | 0.00818 |
| rs7109653  | 11 | 71515856 | A | 0.00164 |
| rs2071010  | 11 | 71578612 | T | 0.01578 |
| rs1028050  | 11 | 71929039 | C | 0.00513 |
| rs17132914 | 11 | 73674047 | T | 0.01002 |
| rs472112   | 11 | 74699149 | A | 0.00353 |
| rs479592   | 11 | 75069880 | C | 0.00889 |
| rs683941   | 11 | 75124598 | A | 0.00643 |
| rs684004   | 11 | 75124632 | T | 0.01572 |
| rs1017713  | 11 | 75177100 | A | 0.00612 |
| rs12278224 | 11 | 75220909 | A | 0.00231 |
| rs4944092  | 11 | 75587267 | T | 0.00260 |
| rs10793164 | 11 | 75820667 | A | 0.00961 |
| rs3753051  | 11 | 75934863 | G | 0.01074 |
| rs1149599  | 11 | 76151353 | A | 0.01190 |
| rs4945129  | 11 | 76378304 | T | 0.00809 |
| rs876319   | 11 | 76747452 | A | 0.01592 |
| rs2725834  | 11 | 76795565 | A | 0.00570 |
| rs7925252  | 11 | 77024533 | G | 0.01436 |
| rs603462   | 11 | 77255512 | T | 0.01229 |
| rs9651740  | 11 | 77423766 | T | 0.00694 |
| rs590981   | 11 | 77498655 | T | 0.01489 |
| rs10751296 | 11 | 77954925 | C | 0.01114 |
| rs4457782  | 11 | 77962381 | G | 0.00586 |
| rs495676   | 11 | 78234108 | G | 0.01384 |
| rs1961578  | 11 | 78329102 | C | 0.01639 |
| rs11237782 | 11 | 78699911 | T | 0.00844 |
| rs472870   | 11 | 78766903 | C | 0.00609 |
| rs580331   | 11 | 78779722 | A | 0.00385 |



|            |    |          |   |         |
|------------|----|----------|---|---------|
| rs11237826 | 11 | 78805883 | C | 0.00319 |
| rs4644672  | 11 | 78852425 | A | 0.00819 |
| rs11237878 | 11 | 78905159 | A | 0.00621 |
| rs11237887 | 11 | 78917149 | C | 0.00259 |
| rs1320725  | 11 | 79167580 | C | 0.00950 |
| rs642770   | 11 | 79366452 | T | 0.01623 |
| rs6592876  | 11 | 79401323 | G | 0.00433 |
| rs12226647 | 11 | 79694440 | G | 0.01627 |
| rs2448269  | 11 | 79777451 | A | 0.00611 |
| rs7112033  | 11 | 79777810 | A | 0.01008 |
| rs2443961  | 11 | 79851547 | G | 0.01068 |
| rs2512479  | 11 | 79892287 | C | 0.01040 |
| rs1949886  | 11 | 79988714 | T | 0.01219 |
| rs2373547  | 11 | 80007427 | A | 0.00523 |
| rs4614474  | 11 | 80007549 | G | 0.00632 |
| rs11232256 | 11 | 80022511 | A | 0.01633 |
| rs4945452  | 11 | 80292425 | T | 0.00171 |
| rs2514489  | 11 | 80543007 | T | 0.00200 |
| rs2514462  | 11 | 80626998 | T | 0.00357 |
| rs4133164  | 11 | 80878412 | G | 0.01556 |
| rs1540173  | 11 | 80913682 | C | 0.00925 |
| rs1894143  | 11 | 80937359 | A | 0.00786 |
| rs12271406 | 11 | 81236198 | T | 0.01566 |
| rs664961   | 11 | 81387538 | G | 0.01499 |
| rs1355974  | 11 | 81765896 | A | 0.01604 |
| rs1790708  | 11 | 82009082 | T | 0.00323 |
| rs1939627  | 11 | 82025143 | C | 0.01252 |
| rs533709   | 11 | 82104086 | A | 0.01600 |
| rs497360   | 11 | 82111606 | C | 0.01381 |
| rs2512674  | 11 | 82839423 | C | 0.01461 |
| rs6592120  | 11 | 82913481 | C | 0.00960 |
| rs515618   | 11 | 82970299 | G | 0.00206 |
| rs558211   | 11 | 82974099 | C | 0.00293 |
| rs10501548 | 11 | 83184528 | A | 0.01465 |
| rs2449597  | 11 | 83372231 | T | 0.00914 |
| rs6592177  | 11 | 83745645 | T | 0.01282 |
| rs17734404 | 11 | 83791078 | T | 0.00031 |
| rs1826613  | 11 | 84463780 | T | 0.01458 |
| rs1823777  | 11 | 84463859 | T | 0.00323 |
| rs185932   | 11 | 84882119 | G | 0.00272 |
| rs7937794  | 11 | 85556553 | A | 0.01383 |
| rs7937189  | 11 | 85740973 | A | 0.00066 |
| rs11605057 | 11 | 86381744 | G | 0.00695 |
| rs17149657 | 11 | 86404674 | C | 0.01509 |

|            |    |          |   |         |
|------------|----|----------|---|---------|
| rs10792929 | 11 | 86643981 | A | 0.01499 |
| rs7926724  | 11 | 86715213 | A | 0.01057 |
| rs10751164 | 11 | 86864830 | C | 0.01226 |
| rs4485130  | 11 | 87104758 | C | 0.00644 |
| rs594453   | 11 | 87244037 | A | 0.01170 |
| rs2155105  | 11 | 87312529 | A | 0.01389 |
| rs10898803 | 11 | 87322406 | T | 0.01494 |
| rs11018796 | 11 | 87562602 | G | 0.00410 |
| rs613716   | 11 | 87855625 | G | 0.00857 |
| rs308766   | 11 | 87857870 | A | 0.00035 |
| rs7396702  | 11 | 88020199 | G | 0.01083 |
| rs10082580 | 11 | 88073510 | A | 0.00200 |
| rs961689   | 11 | 88074716 | G | 0.01562 |
| rs11018629 | 11 | 88846612 | A | 0.01409 |
| rs10734123 | 11 | 89508403 | A | 0.00387 |
| rs7928477  | 11 | 89535588 | G | 0.01656 |
| rs10732446 | 11 | 89538230 | A | 0.00927 |
| rs10732447 | 11 | 89538330 | A | 0.00791 |
| rs11018889 | 11 | 89538451 | T | 0.01634 |
| rs2048139  | 11 | 89761523 | T | 0.01106 |
| rs10830506 | 11 | 89842824 | C | 0.01148 |
| rs10501721 | 11 | 89921579 | G | 0.01143 |
| rs10765374 | 11 | 89996935 | A | 0.01039 |
| rs10830566 | 11 | 90113605 | C | 0.01331 |
| rs11019315 | 11 | 90561562 | C | 0.01667 |
| rs2514930  | 11 | 90573445 | A | 0.01644 |
| rs10765455 | 11 | 90614434 | C | 0.00449 |
| rs12363443 | 11 | 91406757 | A | 0.00478 |
| rs7127751  | 11 | 91755571 | C | 0.01585 |
| rs643695   | 11 | 91831533 | C | 0.00713 |
| rs11020043 | 11 | 92110236 | G | 0.01141 |
| rs3957605  | 11 | 92277315 | C | 0.00849 |
| rs41368047 | 11 | 92753101 | G | 0.00423 |
| rs17651231 | 11 | 93094172 | C | 0.01110 |
| rs1945783  | 11 | 93437267 | A | 0.00384 |
| rs629119   | 11 | 93890094 | T | 0.01151 |
| rs629156   | 11 | 93890123 | T | 0.01276 |
| rs16924603 | 11 | 93894907 | G | 0.00434 |
| rs11020812 | 11 | 93906765 | C | 0.01444 |
| rs11020836 | 11 | 93948540 | T | 0.01155 |
| rs10831258 | 11 | 94026371 | G | 0.00837 |
| rs586026   | 11 | 94033799 | A | 0.00938 |
| rs12789145 | 11 | 94047384 | G | 0.00441 |
| rs12797924 | 11 | 94584608 | T | 0.01482 |

|            |    |           |   |          |
|------------|----|-----------|---|----------|
| rs4307681  | 11 | 94877302  | C | 0.00081  |
| rs11021246 | 11 | 94989214  | A | 0.00672  |
| rs12365735 | 11 | 95008102  | T | 0.00688  |
| rs10765796 | 11 | 95563368  | C | 0.00965  |
| rs16923429 | 11 | 95624950  | G | 0.00144  |
| rs12795536 | 11 | 96176694  | A | 0.00595  |
| rs577524   | 11 | 96315362  | A | 0.01294  |
| rs1587000  | 11 | 96511512  | C | 0.01059  |
| rs923887   | 11 | 96543926  | G | 0.00954  |
| rs4754927  | 11 | 96642470  | A | 0.00631  |
| rs12294161 | 11 | 96761688  | T | 0.00039  |
| rs347768   | 11 | 96762309  | T | 0.00755  |
| rs347776   | 11 | 96777562  | T | 0.00954  |
| rs1962941  | 11 | 96877206  | A | 0.01326  |
| rs649985   | 11 | 97007783  | G | 0.01087  |
| rs11212290 | 11 | 97061599  | C | 0.00089  |
| rs10890887 | 11 | 97173551  | G | 0.01383  |
| rs10789765 | 11 | 97347570  | G | 0.01058  |
| rs11216033 | 11 | 97962694  | A | 0.00187  |
| rs9783305  | 11 | 97966670  | G | 0.01201  |
| rs17132819 | 11 | 98399659  | A | 0.01278  |
| rs4528296  | 11 | 98598888  | C | 0.01410  |
| rs7109406  | 11 | 98867701  | C | 0.00638  |
| rs17134173 | 11 | 99044338  | G | 0.01035  |
| rs11221224 | 11 | 99128324  | C | 0.01140  |
| rs10894037 | 11 | 99245527  | A | 0.00819  |
| rs1812544  | 11 | 99533927  | T | 0.01337  |
| rs10501961 | 11 | 99846823  | G | 0.00310  |
| rs11224435 | 11 | 100138874 | C | 0.00426  |
| rs667504   | 11 | 100221671 | G | 0.01620  |
| rs10750596 | 11 | 100248072 | T | 0.00377  |
| rs541463   | 11 | 100488550 | G | 0.00043  |
| rs10501992 | 11 | 101225143 | A | 0.01490  |
| rs4315037  | 11 | 101225220 | T | 0.00471  |
| rs1711437  | 11 | 101970436 | A | 0.00729  |
| rs1784408  | 11 | 101974719 | C | 0.01082  |
| rs1711427  | 11 | 101982216 | C | 0.00916  |
| rs11225417 | 11 | 102141752 | T | 0.01646  |
| rs11225458 | 11 | 102270618 | A | 0.01554  |
| rs11225703 | 11 | 102691169 | T | 0.01237  |
| rs2122776  | 11 | 102897552 | A | 18.07800 |
| rs10895465 | 11 | 102940124 | A | 0.00309  |
| rs17405661 | 11 | 103266588 | T | 0.00077  |
| rs11226303 | 11 | 103700185 | T | 0.01270  |

|            |    |           |   |         |
|------------|----|-----------|---|---------|
| rs11226307 | 11 | 103713704 | G | 0.01485 |
| rs4755036  | 11 | 103804161 | C | 0.01658 |
| rs10791703 | 11 | 103836649 | G | 0.01331 |
| rs1487687  | 11 | 103902520 | G | 0.00629 |
| rs609552   | 11 | 104224935 | C | 0.00525 |
| rs491191   | 11 | 104390357 | T | 0.01092 |
| rs2847181  | 11 | 105388824 | A | 0.01203 |
| rs11226905 | 11 | 105416001 | G | 0.00049 |
| rs6591148  | 11 | 105425885 | T | 0.01418 |
| rs1940763  | 11 | 105555379 | T | 0.00922 |
| rs594050   | 11 | 105666183 | C | 0.00797 |
| rs11227078 | 11 | 105888427 | A | 0.01570 |
| rs12285411 | 11 | 105897117 | C | 0.00867 |
| rs1945070  | 11 | 105944474 | T | 0.00158 |
| rs1455601  | 11 | 106351279 | C | 0.00099 |
| rs2510596  | 11 | 106356732 | A | 0.00426 |
| rs2276271  | 11 | 106833754 | T | 0.00271 |
| rs17107015 | 11 | 106858523 | C | 0.01578 |
| rs477835   | 11 | 107040834 | C | 0.00936 |
| rs488081   | 11 | 107210818 | A | 0.01508 |
| rs565438   | 11 | 107212100 | C | 0.00050 |
| rs747145   | 11 | 107329312 | A | 0.00283 |
| rs1035730  | 11 | 108355597 | C | 0.00107 |
| rs1396915  | 11 | 108419593 | A | 0.01558 |
| rs12576077 | 11 | 108420513 | T | 0.00917 |
| rs11212886 | 11 | 108425255 | T | 0.00006 |
| rs10749941 | 11 | 108684783 | T | 0.00417 |
| rs11213103 | 11 | 108891145 | G | 0.00838 |
| rs6589115  | 11 | 109484797 | T | 0.00599 |
| rs10891075 | 11 | 109582754 | T | 0.00084 |
| rs1784653  | 11 | 109707745 | T | 0.00789 |
| rs17111116 | 11 | 109727259 | C | 0.01591 |
| rs4753891  | 11 | 109803757 | G | 0.01589 |
| rs7121928  | 11 | 109809813 | A | 0.00374 |
| rs7939476  | 11 | 109848196 | A | 0.00914 |
| rs17392407 | 11 | 109852008 | T | 0.00326 |
| rs10891124 | 11 | 109862212 | G | 0.01401 |
| rs11213434 | 11 | 109862633 | T | 0.00864 |
| rs10488767 | 11 | 109964045 | T | 0.01213 |
| rs7121407  | 11 | 110113005 | G | 0.00469 |
| rs7107797  | 11 | 110116860 | G | 0.00931 |
| rs10891214 | 11 | 110361339 | T | 0.00727 |
| rs532132   | 11 | 110545847 | T | 0.00272 |
| rs4936449  | 11 | 110796503 | G | 0.00258 |

|            |    |           |   |         |
|------------|----|-----------|---|---------|
| rs4936453  | 11 | 110805992 | A | 0.00570 |
| rs4630327  | 11 | 111044537 | T | 0.00469 |
| rs4936678  | 11 | 111130295 | T | 0.01564 |
| rs7951256  | 11 | 111765984 | T | 0.00773 |
| rs10891378 | 11 | 111884369 | C | 0.00087 |
| rs10502161 | 11 | 112348635 | G | 0.00795 |
| rs4595579  | 11 | 112384205 | A | 0.00066 |
| rs17115004 | 11 | 112522371 | T | 0.00848 |
| rs4366519  | 11 | 112525792 | T | 0.00887 |
| rs674246   | 11 | 112646894 | T | 0.01645 |
| rs4938026  | 11 | 112894682 | A | 0.00873 |
| rs4938038  | 11 | 113086252 | A | 0.00489 |
| rs238896   | 11 | 113499715 | G | 0.00845 |
| rs404509   | 11 | 113619587 | T | 0.00816 |
| rs11214967 | 11 | 113736606 | G | 0.01373 |
| rs12797627 | 11 | 113854997 | A | 0.01448 |
| rs11215077 | 11 | 113964527 | C | 0.01030 |
| rs10502193 | 11 | 114169861 | G | 0.01559 |
| rs17117693 | 11 | 114244549 | T | 0.00905 |
| rs7944043  | 11 | 114366260 | A | 0.01343 |
| rs11215416 | 11 | 114582537 | T | 0.00257 |
| rs220861   | 11 | 114799402 | C | 0.01070 |
| rs7951102  | 11 | 115372533 | G | 0.00449 |
| rs11215851 | 11 | 115607770 | C | 0.00115 |
| rs2512160  | 11 | 115728019 | A | 0.00064 |
| rs488435   | 11 | 115742992 | C | 0.00434 |
| rs4586206  | 11 | 115780827 | C | 0.00353 |
| rs17119815 | 11 | 115934773 | C | 0.00464 |
| rs10502221 | 11 | 116332080 | T | 0.01324 |
| rs588918   | 11 | 116361852 | G | 0.00443 |
| rs7115242  | 11 | 116413493 | C | 0.01248 |
| rs1351452  | 11 | 116448564 | G | 0.01454 |
| rs1242229  | 11 | 116567580 | G | 0.01525 |
| rs664971   | 11 | 116576067 | A | 0.00202 |
| rs4938375  | 11 | 116800183 | G | 0.00553 |
| rs7111299  | 11 | 116920595 | A | 0.01442 |
| rs755791   | 11 | 116938896 | T | 0.01311 |
| rs10892151 | 11 | 117036941 | G | 0.01223 |
| rs17121153 | 11 | 117108441 | A | 0.00922 |
| rs625464   | 11 | 117538755 | A | 0.01322 |
| rs7103936  | 11 | 117596846 | C | 0.01227 |
| rs2276064  | 11 | 118034913 | A | 0.01503 |
| rs4938565  | 11 | 118226208 | C | 0.00891 |
| rs7933007  | 11 | 118235879 | A | 0.01035 |

|            |    |           |   |         |
|------------|----|-----------|---|---------|
| rs11217201 | 11 | 118610902 | C | 0.00256 |
| rs12418662 | 11 | 119101982 | A | 0.01542 |
| rs11217548 | 11 | 119248013 | T | 0.00449 |
| rs471814   | 11 | 119299719 | C | 0.01447 |
| rs1530919  | 11 | 119411118 | G | 0.00883 |
| rs1545509  | 11 | 119433098 | G | 0.00811 |
| rs10444338 | 11 | 119434655 | A | 0.00925 |
| rs1551238  | 11 | 119453342 | G | 0.01444 |
| rs6589801  | 11 | 119477197 | T | 0.00851 |
| rs670855   | 11 | 119506905 | C | 0.01315 |
| rs494965   | 11 | 119558860 | C | 0.01466 |
| rs11217775 | 11 | 119626533 | A | 0.01430 |
| rs17123747 | 11 | 119633661 | A | 0.01294 |
| rs632137   | 11 | 119752243 | G | 0.00923 |
| rs3925505  | 11 | 119879098 | A | 0.00339 |
| rs17311303 | 11 | 119882018 | T | 0.00480 |
| rs7105963  | 11 | 119973962 | G | 0.01115 |
| rs751370   | 11 | 120115612 | C | 0.00481 |
| rs4526780  | 11 | 120235831 | T | 0.00431 |
| rs948379   | 11 | 120625340 | G | 0.00480 |
| rs10892714 | 11 | 120642900 | G | 0.00527 |
| rs1583124  | 11 | 120660151 | A | 0.00931 |
| rs891441   | 11 | 120670302 | T | 0.00419 |
| rs1792124  | 11 | 120946730 | T | 0.00287 |
| rs11218552 | 11 | 121590104 | G | 0.01213 |
| rs7925049  | 11 | 121957403 | T | 0.00620 |
| rs10892909 | 11 | 122184691 | G | 0.00621 |
| rs7130674  | 11 | 122511360 | A | 0.00940 |
| rs10790558 | 11 | 122544050 | A | 0.01182 |
| rs7102292  | 11 | 122546723 | C | 0.00159 |
| rs6589973  | 11 | 122568575 | T | 0.00009 |
| rs6589986  | 11 | 122658485 | A | 0.01325 |
| rs11219311 | 11 | 123201471 | A | 0.01027 |
| rs10893243 | 11 | 123898994 | A | 0.01278 |
| rs2226752  | 11 | 123940912 | T | 0.01126 |
| rs10219424 | 11 | 124070598 | T | 0.00592 |
| rs534502   | 11 | 124192016 | A | 0.00010 |
| rs4575285  | 11 | 124327379 | G | 0.01106 |
| rs4595559  | 11 | 124347498 | G | 0.00356 |
| rs679601   | 11 | 124583125 | T | 0.01226 |
| rs10893378 | 11 | 124801611 | G | 0.01565 |
| rs667653   | 11 | 125267989 | C | 0.01206 |
| rs586197   | 11 | 125365265 | G | 0.01544 |
| rs3740909  | 11 | 125394736 | A | 0.00666 |

|            |    |           |   |         |
|------------|----|-----------|---|---------|
| rs3740912  | 11 | 125396479 | T | 0.00287 |
| rs485327   | 11 | 125427135 | G | 0.00822 |
| rs3862628  | 11 | 125748122 | T | 0.00725 |
| rs948057   | 11 | 125836392 | C | 0.01424 |
| rs10790817 | 11 | 126013331 | G | 0.00318 |
| rs11220583 | 11 | 126065829 | G | 0.01442 |
| rs4937214  | 11 | 126255140 | G | 0.01400 |
| rs1939988  | 11 | 126256273 | C | 0.01111 |
| rs2618215  | 11 | 126724446 | A | 0.00037 |
| rs1406330  | 11 | 126845830 | T | 0.00669 |
| rs749513   | 11 | 126861194 | C | 0.00499 |
| rs11221067 | 11 | 127198904 | T | 0.00496 |
| rs11221267 | 11 | 127750541 | A | 0.01491 |
| rs670163   | 11 | 128159454 | T | 0.00009 |
| rs681296   | 11 | 128191473 | C | 0.00109 |
| rs588957   | 11 | 128206751 | A | 0.00421 |
| rs588472   | 11 | 128206861 | A | 0.00650 |
| rs17137982 | 11 | 128227400 | C | 0.01305 |
| rs2855798  | 11 | 128238171 | T | 0.01352 |
| rs11221496 | 11 | 128264481 | T | 0.00184 |
| rs2604228  | 11 | 128320532 | T | 0.00387 |
| rs2954145  | 11 | 128917936 | G | 0.00974 |
| rs547041   | 11 | 129078086 | A | 0.01539 |
| rs691766   | 11 | 129099080 | T | 0.01379 |
| rs504990   | 11 | 129099231 | G | 0.01267 |
| rs10894126 | 11 | 129118377 | C | 6.36000 |
| rs691570   | 11 | 129118397 | T | 0.01581 |
| rs2288403  | 11 | 129243199 | C | 0.00357 |
| rs530351   | 11 | 129579400 | A | 0.00886 |
| rs10894216 | 11 | 129938943 | G | 0.01299 |
| rs11222341 | 11 | 130210863 | A | 0.00855 |
| rs1655490  | 11 | 130414235 | A | 0.00651 |
| rs1793220  | 11 | 130414497 | G | 0.01606 |
| rs7358316  | 11 | 130965110 | G | 0.01621 |
| rs789520   | 11 | 131042553 | T | 0.00199 |
| rs516721   | 11 | 131240209 | A | 0.00726 |
| rs11222838 | 11 | 131292792 | C | 0.01649 |
| rs11222869 | 11 | 131406958 | G | 0.00147 |
| rs7111704  | 11 | 131769843 | C | 0.01383 |
| rs490435   | 11 | 131892044 | T | 0.00964 |
| rs554547   | 11 | 131894436 | G | 0.01239 |
| rs10894589 | 11 | 131998236 | A | 0.00622 |
| rs10894592 | 11 | 132004415 | A | 0.01003 |
| rs9633971  | 11 | 132007648 | G | 0.01329 |

|            |    |           |   |         |
|------------|----|-----------|---|---------|
| rs10791272 | 11 | 132412886 | T | 0.00089 |
| rs11223337 | 11 | 132418054 | C | 0.01242 |
| rs1630675  | 11 | 132601535 | G | 0.00469 |
| rs7932578  | 11 | 132795774 | C | 0.00111 |
| rs7114322  | 11 | 132851145 | G | 0.00417 |
| rs1595895  | 11 | 133674016 | G | 0.01527 |
| rs10750560 | 11 | 133723197 | C | 0.01136 |
| rs1892988  | 11 | 134123463 | G | 0.00244 |
| rs4569023  | 11 | 134130098 | A | 0.01429 |
| rs4936257  | 11 | 134269918 | C | 0.01193 |
| rs1824832  | 11 | 134313007 | G | 0.00050 |
| rs4540845  | 11 | 134435899 | A | 0.01057 |
| rs478520   | 12 | 165786    | T | 0.01320 |
| rs515639   | 12 | 221584    | T | 0.00871 |
| rs523169   | 12 | 228276    | T | 0.00849 |
| rs11064294 | 12 | 675712    | T | 0.00689 |
| rs7972667  | 12 | 734094    | A | 0.00081 |
| rs11830412 | 12 | 1076722   | C | 0.00163 |
| rs2286385  | 12 | 1760850   | C | 0.00847 |
| rs10735004 | 12 | 1817454   | T | 0.01463 |
| rs11062066 | 12 | 1991557   | C | 0.00660 |
| rs4765962  | 12 | 2539893   | G | 0.00106 |
| rs10735019 | 12 | 3276125   | T | 0.01236 |
| rs7961141  | 12 | 3424976   | C | 0.01002 |
| rs10744613 | 12 | 3425082   | C | 0.00653 |
| rs6489469  | 12 | 3426611   | G | 0.01236 |
| rs917602   | 12 | 3549984   | A | 0.01546 |
| rs16930743 | 12 | 3718933   | T | 0.00850 |
| rs16930761 | 12 | 3721838   | G | 0.00343 |
| rs11062799 | 12 | 3737524   | G | 0.01441 |
| rs10505726 | 12 | 3848219   | T | 0.00623 |
| rs10774182 | 12 | 3874725   | A | 0.00441 |
| rs11062989 | 12 | 4050174   | C | 0.01201 |
| rs7138216  | 12 | 4204569   | C | 0.01611 |
| rs11063112 | 12 | 4348341   | A | 0.01012 |
| rs7961477  | 12 | 4441250   | A | 0.01141 |
| rs11063199 | 12 | 4462115   | C | 0.00148 |
| rs11063348 | 12 | 4797738   | A | 0.01662 |
| rs17775527 | 12 | 4860176   | G | 0.00739 |
| rs4766314  | 12 | 4924884   | T | 0.01191 |
| rs1558279  | 12 | 4974367   | G | 0.00784 |
| rs11063582 | 12 | 5239854   | A | 0.01645 |
| rs2240894  | 12 | 5258297   | T | 0.00834 |
| rs17722632 | 12 | 5442242   | A | 0.00345 |



|            |    |          |   |          |
|------------|----|----------|---|----------|
| rs4930767  | 12 | 5467642  | A | 0.00078  |
| rs10774354 | 12 | 5642027  | C | 0.01000  |
| rs17723813 | 12 | 5697414  | A | 0.01219  |
| rs6489666  | 12 | 5855732  | G | 0.00417  |
| rs7484640  | 12 | 5859898  | C | 19.24800 |
| rs16932485 | 12 | 6224557  | A | 0.00111  |
| rs3742088  | 12 | 7145945  | A | 0.01389  |
| rs7306824  | 12 | 7419738  | T | 0.00199  |
| rs7953031  | 12 | 7534052  | A | 0.00385  |
| rs3210140  | 12 | 7546404  | G | 0.00469  |
| rs1558531  | 12 | 7627020  | C | 0.00336  |
| rs1561560  | 12 | 8654230  | A | 0.00421  |
| rs7957038  | 12 | 9039514  | A | 0.00621  |
| rs2114851  | 12 | 9198262  | A | 0.00066  |
| rs12828464 | 12 | 9369005  | T | 0.00919  |
| rs544545   | 12 | 9983104  | G | 0.01314  |
| rs2742115  | 12 | 10213449 | C | 0.00342  |
| rs4763531  | 12 | 10629565 | A | 0.01543  |
| rs4763562  | 12 | 10648792 | T | 0.00271  |
| rs16922916 | 12 | 10707846 | C | 0.00012  |
| rs7968284  | 12 | 10709127 | T | 0.00396  |
| rs7315801  | 12 | 10785259 | T | 0.01407  |
| rs4237931  | 12 | 11298212 | G | 0.00175  |
| rs16933735 | 12 | 11533299 | A | 0.01337  |
| rs2724588  | 12 | 11754082 | C | 0.00344  |
| rs17818498 | 12 | 11764555 | A | 0.00971  |
| rs12369491 | 12 | 11781775 | A | 11.99200 |
| rs12828066 | 12 | 11783232 | A | 0.00720  |
| rs2448031  | 12 | 12142978 | G | 0.00631  |
| rs12581531 | 12 | 12547725 | G | 0.00841  |
| rs4762307  | 12 | 12884433 | A | 0.01634  |
| rs6488576  | 12 | 13067577 | G | 0.01222  |
| rs7978453  | 12 | 13070902 | G | 0.00956  |
| rs1552389  | 12 | 13091145 | A | 0.00723  |
| rs7294646  | 12 | 13093286 | G | 0.00586  |
| rs17820032 | 12 | 13139424 | A | 0.00796  |
| rs4583067  | 12 | 13170986 | A | 0.00291  |
| rs1805544  | 12 | 13679101 | G | 0.01502  |
| rs4140764  | 12 | 13843489 | G | 0.00917  |
| rs11056264 | 12 | 15017270 | C | 0.01123  |
| rs6488806  | 12 | 16015699 | G | 0.00937  |
| rs3782545  | 12 | 16016060 | A | 0.01366  |
| rs1868805  | 12 | 16027219 | C | 0.01432  |
| rs10846420 | 12 | 16802898 | G | 0.00193  |

|            |    |          |   |         |
|------------|----|----------|---|---------|
| rs1488080  | 12 | 16838276 | T | 0.00252 |
| rs2178109  | 12 | 17391620 | G | 0.00095 |
| rs7294744  | 12 | 18260404 | A | 0.00001 |
| rs12303068 | 12 | 18992028 | T | 0.01617 |
| rs11044902 | 12 | 19900749 | A | 0.01454 |
| rs7970503  | 12 | 20247248 | G | 0.01452 |
| rs7976912  | 12 | 20262861 | T | 0.00889 |
| rs10841486 | 12 | 20363469 | G | 0.01265 |
| rs10505872 | 12 | 21363521 | C | 0.00083 |
| rs6487230  | 12 | 21503604 | A | 0.00001 |
| rs7954395  | 12 | 21619527 | C | 0.00049 |
| rs12826088 | 12 | 22327036 | G | 0.01618 |
| rs260887   | 12 | 22822130 | T | 0.01347 |
| rs11046765 | 12 | 23090432 | G | 0.00396 |
| rs11046841 | 12 | 23219587 | T | 0.00624 |
| rs16926286 | 12 | 23539093 | A | 0.00588 |
| rs11046989 | 12 | 23626010 | C | 0.00400 |
| rs16926425 | 12 | 23632891 | A | 0.00158 |
| rs10842230 | 12 | 23871249 | C | 0.00864 |
| rs7136898  | 12 | 23945839 | G | 0.00506 |
| rs12581677 | 12 | 23951999 | G | 0.00641 |
| rs10842249 | 12 | 24010223 | T | 0.00230 |
| rs4963749  | 12 | 24327820 | T | 0.00568 |
| rs10842390 | 12 | 24705541 | A | 0.00341 |
| rs10842398 | 12 | 24755688 | C | 0.00978 |
| rs1872639  | 12 | 24836266 | C | 0.01503 |
| rs16928354 | 12 | 25075454 | A | 0.00531 |
| rs7976254  | 12 | 25147621 | C | 0.00220 |
| rs10842519 | 12 | 25317723 | T | 0.01216 |
| rs17390442 | 12 | 25334604 | G | 0.01176 |
| rs11048402 | 12 | 26119148 | G | 0.00802 |
| rs7300697  | 12 | 26208437 | G | 0.01442 |
| rs10842688 | 12 | 26229561 | A | 0.01391 |
| rs10842689 | 12 | 26229632 | A | 0.01044 |
| rs4963981  | 12 | 26370900 | G | 0.01390 |
| rs10771281 | 12 | 26424638 | C | 0.01553 |
| rs11048530 | 12 | 26504908 | G | 0.00135 |
| rs3736183  | 12 | 26520918 | T | 0.00241 |
| rs6487557  | 12 | 26556696 | A | 0.01466 |
| rs11048593 | 12 | 26628515 | A | 0.00801 |
| rs7972648  | 12 | 26682161 | G | 0.01597 |
| rs1463590  | 12 | 26685022 | G | 0.00757 |
| rs2306550  | 12 | 26700804 | T | 0.01377 |
| rs12823128 | 12 | 26763997 | T | 0.01086 |

|            |    |          |   |         |
|------------|----|----------|---|---------|
| rs2122267  | 12 | 26797743 | G | 0.00244 |
| rs4963685  | 12 | 27241258 | C | 0.00167 |
| rs10506024 | 12 | 27609825 | G | 0.00477 |
| rs10842941 | 12 | 27629473 | G | 0.00041 |
| rs10771349 | 12 | 27629871 | A | 0.01083 |
| rs7295096  | 12 | 27689172 | T | 0.00583 |
| rs11049171 | 12 | 27868166 | A | 0.00536 |
| rs10843028 | 12 | 27985938 | C | 0.00612 |
| rs7294486  | 12 | 28226189 | C | 0.01441 |
| rs10506031 | 12 | 28423261 | C | 0.00795 |
| rs12314459 | 12 | 28619532 | A | 0.00988 |
| rs309028   | 12 | 28790151 | G | 0.00332 |
| rs309043   | 12 | 28825379 | C | 0.00092 |
| rs309046   | 12 | 28840623 | A | 0.00404 |
| rs1480636  | 12 | 28876460 | G | 0.01498 |
| rs1480635  | 12 | 28876540 | A | 0.01533 |
| rs789123   | 12 | 28877817 | C | 0.00639 |
| rs1021312  | 12 | 28922763 | C | 0.01150 |
| rs4931135  | 12 | 29081528 | T | 0.00296 |
| rs10771478 | 12 | 29119551 | T | 0.00072 |
| rs4280037  | 12 | 29337413 | A | 0.00824 |
| rs2216858  | 12 | 29552643 | C | 0.01486 |
| rs7294502  | 12 | 29627037 | A | 0.00443 |
| rs16934692 | 12 | 29702738 | A | 9.65500 |
| rs2882467  | 12 | 29818043 | C | 0.00390 |
| rs11050428 | 12 | 29823051 | T | 0.01356 |
| rs11050523 | 12 | 29931984 | G | 0.00597 |
| rs11050546 | 12 | 29964601 | G | 0.00519 |
| rs2200282  | 12 | 30000944 | A | 0.01478 |
| rs10743696 | 12 | 30195234 | G | 0.01303 |
| rs7311139  | 12 | 30204772 | C | 0.01320 |
| rs7979416  | 12 | 30446335 | C | 0.01415 |
| rs10771719 | 12 | 30481442 | C | 0.00115 |
| rs11050908 | 12 | 30499254 | C | 0.00261 |
| rs918255   | 12 | 31046105 | G | 0.00120 |
| rs12231929 | 12 | 31267475 | C | 0.00965 |
| rs1666230  | 12 | 31921073 | T | 0.00521 |
| rs10844055 | 12 | 31965995 | A | 0.00245 |
| rs16919113 | 12 | 32024793 | C | 0.00038 |
| rs10771895 | 12 | 32030685 | C | 0.01626 |
| rs6488035  | 12 | 32195894 | C | 0.00773 |
| rs7971525  | 12 | 32477931 | A | 0.01075 |
| rs4931631  | 12 | 32520762 | C | 0.01509 |
| rs10844251 | 12 | 32644486 | G | 0.00347 |

|            |    |          |   |         |
|------------|----|----------|---|---------|
| rs10844260 | 12 | 32671763 | G | 0.00328 |
| rs10771978 | 12 | 32717095 | C | 0.00367 |
| rs3600     | 12 | 32788211 | A | 0.01408 |
| rs11052414 | 12 | 33098383 | A | 0.00439 |
| rs4931700  | 12 | 33233844 | A | 0.00783 |
| rs7959960  | 12 | 33793335 | A | 0.01385 |
| rs11053208 | 12 | 34351296 | G | 0.00547 |
| rs7488727  | 12 | 37066328 | T | 0.01072 |
| rs1472657  | 12 | 37325184 | G | 0.01323 |
| rs10747664 | 12 | 37727666 | A | 0.01399 |
| rs814228   | 12 | 38670169 | C | 0.00669 |
| rs2708437  | 12 | 38901046 | A | 5.91500 |
| rs4293189  | 12 | 38943492 | G | 0.00984 |
| rs10878405 | 12 | 39028521 | G | 0.00221 |
| rs17128391 | 12 | 39198429 | G | 0.01393 |
| rs41353744 | 12 | 39281690 | T | 0.00287 |
| rs10878917 | 12 | 39309270 | A | 0.00175 |
| rs17128779 | 12 | 39454516 | T | 0.00781 |
| rs6581955  | 12 | 39466178 | G | 0.00819 |
| rs10784898 | 12 | 39516989 | G | 0.00256 |
| rs11180828 | 12 | 40009387 | G | 0.00574 |
| rs2730830  | 12 | 40115413 | G | 0.00689 |
| rs2218865  | 12 | 40374291 | A | 0.01256 |
| rs7316844  | 12 | 40411394 | A | 0.01503 |
| rs1466790  | 12 | 40413042 | A | 0.01284 |
| rs1466791  | 12 | 40413058 | C | 0.00766 |
| rs1532451  | 12 | 40427439 | G | 0.00334 |
| rs17604073 | 12 | 40546276 | C | 0.00503 |
| rs722216   | 12 | 40591624 | A | 0.00100 |
| rs1234032  | 12 | 40640896 | G | 0.00032 |
| rs7315650  | 12 | 40752196 | T | 0.00263 |
| rs12371615 | 12 | 40850256 | C | 0.00486 |
| rs1238290  | 12 | 40872206 | T | 0.01641 |
| rs1796381  | 12 | 41128742 | C | 0.00438 |
| rs17491437 | 12 | 41345395 | T | 0.00896 |
| rs1356422  | 12 | 41429263 | G | 0.00686 |
| rs7308182  | 12 | 41661598 | A | 0.00261 |
| rs10880415 | 12 | 41715122 | C | 0.00728 |
| rs11182236 | 12 | 42413091 | C | 0.00198 |
| rs12319024 | 12 | 42421914 | A | 0.00946 |
| rs10506235 | 12 | 42797754 | T | 0.01065 |
| rs17094231 | 12 | 42888643 | G | 0.00405 |
| rs17094242 | 12 | 42890075 | G | 0.00462 |
| rs12308701 | 12 | 43088189 | C | 0.00814 |

|             |    |          |   |         |
|-------------|----|----------|---|---------|
| rs17652045  | 12 | 43344877 | C | 0.00165 |
| rs17095247  | 12 | 43605390 | C | 0.01432 |
| rs7315817   | 12 | 43728376 | C | 0.01502 |
| rs17095721  | 12 | 43989972 | C | 0.00594 |
| rs7307697   | 12 | 44125127 | G | 0.00539 |
| rs10400573  | 12 | 44314828 | G | 0.01105 |
| rs7315192   | 12 | 44371488 | A | 0.01114 |
| rs17096991  | 12 | 45214660 | C | 0.00715 |
| rs17121412  | 12 | 45231962 | T | 0.00689 |
| rs2471618   | 12 | 45258412 | A | 0.00548 |
| rs7965705   | 12 | 45644553 | G | 0.01254 |
| rs2140842   | 12 | 45917496 | C | 0.00667 |
| rs1468196   | 12 | 46096161 | A | 0.00924 |
| rs2005692   | 12 | 46099144 | G | 0.00499 |
| rs2051827   | 12 | 46242298 | A | 0.00719 |
| rs668968    | 12 | 46291715 | C | 0.01344 |
| rs1302919   | 12 | 46317652 | C | 0.00318 |
| rs2239187   | 12 | 46403974 | C | 0.01101 |
| rs17122666  | 12 | 46788841 | T | 0.01042 |
| rs2228500   | 12 | 46812979 | A | 0.00244 |
| rs7962390   | 12 | 46863254 | T | 0.00544 |
| rs6580685   | 12 | 47297076 | C | 0.00640 |
| rs2271688   | 12 | 48545796 | C | 0.01415 |
| rs3759125   | 12 | 48629875 | C | 0.01283 |
| rs10875990  | 12 | 48658293 | A | 0.00621 |
| rs4768887   | 12 | 49214148 | T | 0.00893 |
| rs7301125   | 12 | 49253045 | C | 0.00581 |
| rs10506296  | 12 | 49374124 | G | 0.01214 |
| rs7977742   | 12 | 49416474 | C | 0.00545 |
| rs224572    | 12 | 49702787 | A | 0.00558 |
| rs1362963   | 12 | 49973251 | T | 0.01162 |
| rs10506301  | 12 | 50054931 | A | 0.00504 |
| rs2029674   | 12 | 50256509 | C | 0.00250 |
| rs303817    | 12 | 50462502 | T | 0.00009 |
| rs11610143  | 12 | 50635338 | C | 0.01416 |
| rs1283176   | 12 | 50706226 | C | 0.01219 |
| rs1732311   | 12 | 51028415 | G | 0.00697 |
| rs1994516   | 12 | 51344781 | A | 0.00746 |
| rs1567757   | 12 | 51368520 | C | 0.00750 |
| rs12315733  | 12 | 51478204 | A | 0.01536 |
| rs7137593   | 12 | 51536728 | T | 0.00511 |
| rs17773850  | 12 | 52514690 | T | 0.00768 |
| rs111170732 | 12 | 52543443 | T | 0.00832 |
| rs111170760 | 12 | 52590481 | G | 0.01479 |

|            |    |          |   |         |
|------------|----|----------|---|---------|
| rs10876558 | 12 | 53088357 | G | 0.01534 |
| rs266687   | 12 | 53444976 | T | 0.00658 |
| rs17116877 | 12 | 53737456 | G | 0.00619 |
| rs7962641  | 12 | 53848880 | G | 0.01038 |
| rs2720174  | 12 | 56754430 | A | 0.00834 |
| rs10506381 | 12 | 57062804 | T | 0.00360 |
| rs782103   | 12 | 57122898 | T | 0.01577 |
| rs17121341 | 12 | 57400680 | C | 0.00083 |
| rs2605422  | 12 | 57434906 | T | 0.00513 |
| rs7302361  | 12 | 57445868 | G | 0.00185 |
| rs10877221 | 12 | 57849389 | C | 0.01400 |
| rs10877232 | 12 | 57865135 | G | 0.00687 |
| rs11172950 | 12 | 57896472 | C | 0.00115 |
| rs10877268 | 12 | 58062330 | G | 0.00590 |
| rs276056   | 12 | 58087199 | T | 0.00709 |
| rs17122718 | 12 | 58300154 | A | 0.00582 |
| rs982321   | 12 | 58324202 | C | 0.01653 |
| rs17122785 | 12 | 58334869 | G | 0.00921 |
| rs1693598  | 12 | 58403453 | A | 0.00152 |
| rs4326838  | 12 | 58577210 | A | 0.00952 |
| rs10877406 | 12 | 58900377 | T | 0.01420 |
| rs1516032  | 12 | 60088543 | A | 0.01229 |
| rs10877662 | 12 | 60110245 | C | 0.00521 |
| rs7963802  | 12 | 60682041 | C | 0.01074 |
| rs7955714  | 12 | 60685848 | A | 0.01366 |
| rs11174316 | 12 | 60780616 | A | 0.00076 |
| rs11612077 | 12 | 60823647 | C | 0.01157 |
| rs11174347 | 12 | 60825121 | A | 0.00298 |
| rs7973394  | 12 | 60853762 | A | 0.01176 |
| rs7976058  | 12 | 60961914 | T | 0.00199 |
| rs11174439 | 12 | 61034378 | T | 0.01233 |
| rs11174620 | 12 | 61398152 | G | 0.00829 |
| rs17098779 | 12 | 61705504 | A | 0.00777 |
| rs11174879 | 12 | 61909420 | G | 0.00110 |
| rs11175294 | 12 | 62920868 | G | 0.00023 |
| rs11175342 | 12 | 63006061 | A | 0.00941 |
| rs7976491  | 12 | 63586810 | G | 0.00767 |
| rs7306171  | 12 | 64312314 | C | 0.00552 |
| rs10878381 | 12 | 64796389 | C | 0.00588 |
| rs4913353  | 12 | 65129534 | C | 0.00024 |
| rs2904532  | 12 | 65582311 | C | 0.00238 |
| rs10878535 | 12 | 65609808 | A | 0.00881 |
| rs12820762 | 12 | 65619225 | C | 0.00267 |
| rs1152882  | 12 | 66120331 | G | 0.01340 |

|            |    |          |   |         |
|------------|----|----------|---|---------|
| rs10878630 | 12 | 66244967 | T | 0.01505 |
| rs10735944 | 12 | 66776260 | A | 0.01495 |
| rs2216164  | 12 | 66820607 | C | 0.00068 |
| rs2193048  | 12 | 66823141 | G | 0.00965 |
| rs2870953  | 12 | 66830897 | T | 0.00617 |
| rs10878779 | 12 | 66867288 | C | 0.00597 |
| rs11570915 | 12 | 66905871 | A | 0.01334 |
| rs734871   | 12 | 66917055 | A | 0.01219 |
| rs17700390 | 12 | 66918123 | G | 0.01212 |
| rs11177504 | 12 | 67797677 | C | 0.00197 |
| rs11177543 | 12 | 67875473 | C | 0.01014 |
| rs11178166 | 12 | 68956853 | C | 0.00217 |
| rs412528   | 12 | 69120135 | T | 0.00117 |
| rs2270584  | 12 | 69818366 | C | 0.00503 |
| rs10748186 | 12 | 70622255 | G | 0.00462 |
| rs1864838  | 12 | 71286286 | C | 0.00434 |
| rs1807989  | 12 | 71360679 | G | 0.00330 |
| rs2887021  | 12 | 71360699 | A | 0.01609 |
| rs11179324 | 12 | 71377874 | T | 0.00729 |
| rs11179448 | 12 | 71567861 | A | 0.01040 |
| rs6421241  | 12 | 72166016 | T | 0.00816 |
| rs7314330  | 12 | 73381431 | T | 0.01104 |
| rs7138969  | 12 | 73394160 | A | 0.01258 |
| rs7958912  | 12 | 73436548 | A | 0.00694 |
| rs7973014  | 12 | 73455942 | A | 0.01468 |
| rs10785156 | 12 | 73604536 | T | 0.01390 |
| rs10506678 | 12 | 73708472 | C | 0.00079 |
| rs7962276  | 12 | 74310581 | G | 0.01447 |
| rs10879961 | 12 | 74375206 | T | 0.01665 |
| rs7969436  | 12 | 74375460 | A | 0.00394 |
| rs10879976 | 12 | 74456589 | T | 0.00592 |
| rs10879987 | 12 | 74498486 | C | 0.00490 |
| rs7133339  | 12 | 75189402 | T | 0.00237 |
| rs7962515  | 12 | 75222674 | G | 0.00451 |
| rs10778674 | 12 | 75378005 | G | 0.00008 |
| rs12309314 | 12 | 75636758 | G | 0.00464 |
| rs1716525  | 12 | 76183707 | A | 0.01076 |
| rs1491041  | 12 | 76518153 | T | 0.00441 |
| rs1479018  | 12 | 76864828 | A | 0.01167 |
| rs2293650  | 12 | 78214615 | T | 0.01451 |
| rs1405493  | 12 | 78318095 | T | 0.01209 |
| rs7315638  | 12 | 78331410 | T | 0.00489 |
| rs2251214  | 12 | 78347982 | G | 0.00997 |
| rs7138252  | 12 | 78446450 | A | 0.00441 |

|            |    |          |   |          |
|------------|----|----------|---|----------|
| rs11114162 | 12 | 78455616 | T | 0.00190  |
| rs1463228  | 12 | 78828941 | C | 0.00018  |
| rs1451098  | 12 | 79247890 | G | 0.00737  |
| rs896202   | 12 | 79281780 | T | 0.01139  |
| rs2717473  | 12 | 79330649 | A | 0.00049  |
| rs7309612  | 12 | 79471213 | G | 0.00030  |
| rs7132043  | 12 | 79492531 | G | 10.78600 |
| rs1178704  | 12 | 79555186 | T | 0.00977  |
| rs11114653 | 12 | 79834900 | T | 0.00695  |
| rs12301355 | 12 | 80017957 | A | 0.01498  |
| rs12296937 | 12 | 80018383 | C | 0.01093  |
| rs1921045  | 12 | 80239063 | C | 0.00347  |
| rs10506856 | 12 | 80912999 | A | 0.01285  |
| rs11115179 | 12 | 80991051 | T | 0.00920  |
| rs4143188  | 12 | 81326916 | A | 0.01447  |
| rs11115373 | 12 | 81657221 | C | 0.00280  |
| rs10862511 | 12 | 81725727 | A | 0.00457  |
| rs7304237  | 12 | 81766456 | C | 0.00520  |
| rs11115584 | 12 | 82016576 | G | 0.00160  |
| rs2056218  | 12 | 82056671 | G | 0.01293  |
| rs7137313  | 12 | 82113049 | C | 0.01056  |
| rs1517815  | 12 | 82115436 | C | 0.01564  |
| rs4482098  | 12 | 82140528 | A | 0.01543  |
| rs7484818  | 12 | 82219067 | G | 0.01144  |
| rs11115730 | 12 | 82241901 | A | 0.01233  |
| rs7959848  | 12 | 82270137 | A | 0.01226  |
| rs11837529 | 12 | 82573928 | C | 0.00126  |
| rs10779022 | 12 | 82594624 | C | 0.00424  |
| rs2128350  | 12 | 83004453 | T | 0.00770  |
| rs2929815  | 12 | 83124941 | T | 0.00440  |
| rs12581616 | 12 | 83175715 | A | 0.00470  |
| rs12320923 | 12 | 83179322 | A | 0.00520  |
| rs17011775 | 12 | 83180847 | T | 0.01000  |
| rs7135755  | 12 | 83181327 | T | 0.00546  |
| rs4491329  | 12 | 83181851 | T | 0.01027  |
| rs11116280 | 12 | 83183659 | G | 0.00550  |
| rs12313738 | 12 | 83184837 | C | 0.01520  |
| rs7973519  | 12 | 83208883 | A | 0.00786  |
| rs10506911 | 12 | 83995528 | C | 0.00075  |
| rs7486001  | 12 | 84191889 | C | 0.00419  |
| rs10746342 | 12 | 84278771 | A | 0.01147  |
| rs1398440  | 12 | 84314940 | C | 0.01310  |
| rs1398442  | 12 | 84334038 | T | 0.01412  |
| rs7484736  | 12 | 84457457 | A | 0.00158  |



|            |    |          |   |         |
|------------|----|----------|---|---------|
| rs7975477  | 12 | 85651980 | A | 0.00063 |
| rs17014284 | 12 | 85805587 | T | 0.00902 |
| rs1368563  | 12 | 86028234 | A | 0.00183 |
| rs4303306  | 12 | 86764038 | G | 0.00249 |
| rs10777085 | 12 | 86909836 | C | 0.01325 |
| rs11104708 | 12 | 86913935 | C | 0.00792 |
| rs17364616 | 12 | 88354318 | G | 0.01254 |
| rs10745509 | 12 | 88604351 | C | 0.00957 |
| rs704110   | 12 | 89317091 | A | 0.01337 |
| rs17193641 | 12 | 90294961 | C | 0.00885 |
| rs11106228 | 12 | 90561550 | A | 0.01643 |
| rs4760385  | 12 | 91189657 | C | 0.00165 |
| rs7978809  | 12 | 91385221 | C | 0.00352 |
| rs11614500 | 12 | 91544383 | C | 0.00966 |
| rs41464449 | 12 | 91545805 | T | 0.00758 |
| rs17730847 | 12 | 91548717 | C | 0.01495 |
| rs10777420 | 12 | 91551302 | T | 0.01178 |
| rs2120575  | 12 | 91609585 | G | 0.01548 |
| rs7972216  | 12 | 91649196 | G | 0.00755 |
| rs7958821  | 12 | 91658207 | G | 0.00359 |
| rs10859378 | 12 | 91663365 | A | 0.00364 |
| rs11106763 | 12 | 91872651 | G | 0.00415 |
| rs11106988 | 12 | 92258581 | C | 0.00209 |
| rs10777556 | 12 | 92836222 | T | 0.00317 |
| rs7135433  | 12 | 92872354 | T | 0.01248 |
| rs4761756  | 12 | 92873911 | C | 0.01067 |
| rs4761625  | 12 | 93456977 | C | 0.01201 |
| rs2651985  | 12 | 93559305 | G | 0.01569 |
| rs2651982  | 12 | 93570929 | G | 0.01167 |
| rs6538534  | 12 | 93678633 | C | 0.01537 |
| rs7972350  | 12 | 93684736 | T | 0.01336 |
| rs4761664  | 12 | 93702211 | C | 0.00790 |
| rs10777641 | 12 | 93777015 | A | 0.00718 |
| rs7307510  | 12 | 94761701 | G | 0.01321 |
| rs2117914  | 12 | 94790166 | G | 0.00982 |
| rs4762652  | 12 | 94875228 | G | 0.00383 |
| rs2043608  | 12 | 94878586 | G | 0.00474 |
| rs7961807  | 12 | 94880938 | T | 0.01529 |
| rs4762293  | 12 | 95179367 | G | 0.00153 |
| rs7972539  | 12 | 95345700 | A | 0.00582 |
| rs41322846 | 12 | 95428236 | G | 0.01070 |
| rs10431437 | 12 | 95602230 | G | 0.00148 |
| rs34493    | 12 | 95787104 | G | 0.00656 |
| rs10860188 | 12 | 96253413 | A | 0.01637 |

|            |    |           |   |         |
|------------|----|-----------|---|---------|
| rs34537    | 12 | 96582908  | G | 0.00068 |
| rs34540    | 12 | 96584094  | G | 0.00005 |
| rs4609647  | 12 | 97611741  | G | 0.00161 |
| rs7313721  | 12 | 98005215  | A | 0.01567 |
| rs7960388  | 12 | 99701729  | C | 0.00431 |
| rs1514797  | 12 | 99705093  | G | 0.00427 |
| rs11110677 | 12 | 100060692 | T | 0.00399 |
| rs11110932 | 12 | 100574306 | G | 0.01047 |
| rs11110939 | 12 | 100578274 | G | 0.00897 |
| rs11110994 | 12 | 100667339 | G | 0.00662 |
| rs2036771  | 12 | 101041934 | A | 0.01528 |
| rs11111272 | 12 | 101351571 | C | 0.00023 |
| rs4764698  | 12 | 101384190 | C | 0.00980 |
| rs2100635  | 12 | 101515117 | G | 0.00143 |
| rs7977073  | 12 | 101515601 | A | 0.01367 |
| rs937471   | 12 | 101607332 | G | 0.01270 |
| rs1357768  | 12 | 101691183 | A | 0.00723 |
| rs1603818  | 12 | 101913368 | C | 0.00108 |
| rs11111535 | 12 | 102258345 | C | 0.00893 |
| rs17034112 | 12 | 102497741 | G | 0.00446 |
| rs703623   | 12 | 102559085 | C | 0.00385 |
| rs1863878  | 12 | 102589976 | T | 0.01295 |
| rs11614418 | 12 | 102591942 | T | 0.00051 |
| rs10861081 | 12 | 102642509 | T | 0.00278 |
| rs1595338  | 12 | 102792249 | A | 7.98300 |
| rs4135081  | 12 | 102893176 | C | 0.00243 |
| rs7971994  | 12 | 102964551 | C | 0.00512 |
| rs7132831  | 12 | 102972036 | C | 0.00748 |
| rs7973993  | 12 | 103396502 | T | 0.00014 |
| rs7963874  | 12 | 103406134 | A | 0.01396 |
| rs703664   | 12 | 103591660 | A | 0.00941 |
| rs11112159 | 12 | 103594006 | C | 0.00731 |
| rs10861342 | 12 | 103982927 | T | 0.00084 |
| rs2374561  | 12 | 104841395 | G | 0.00462 |
| rs12300729 | 12 | 105419382 | G | 0.01316 |
| rs3741892  | 12 | 105911293 | G | 0.00089 |
| rs2178492  | 12 | 106093855 | C | 0.00013 |
| rs1861693  | 12 | 106127287 | A | 0.00034 |
| rs11113221 | 12 | 106149778 | T | 0.01424 |
| rs11113224 | 12 | 106150988 | C | 0.00455 |
| rs1861691  | 12 | 106201676 | C | 0.00699 |
| rs11113283 | 12 | 106279191 | T | 0.00296 |
| rs1426463  | 12 | 106310763 | G | 0.01274 |
| rs1426462  | 12 | 106311013 | A | 0.01154 |

|            |    |           |   |         |
|------------|----|-----------|---|---------|
| rs7969301  | 12 | 106466117 | A | 0.01166 |
| rs1420742  | 12 | 106541819 | G | 0.00558 |
| rs4258462  | 12 | 106657818 | C | 0.00348 |
| rs10861779 | 12 | 106684894 | A | 0.01254 |
| rs1895941  | 12 | 106857124 | T | 0.00214 |
| rs12316047 | 12 | 106917975 | T | 0.01547 |
| rs881512   | 12 | 106970207 | G | 0.01108 |
| rs12321936 | 12 | 107250676 | T | 0.01170 |
| rs11113845 | 12 | 107302428 | G | 0.01512 |
| rs16939985 | 12 | 108070069 | T | 0.00342 |
| rs2284685  | 12 | 108171165 | G | 0.00721 |
| rs2287192  | 12 | 108415977 | C | 0.00784 |
| rs634389   | 12 | 110649098 | C | 0.00297 |
| rs12814443 | 12 | 112401668 | A | 0.00847 |
| rs11613697 | 12 | 112487688 | G | 0.00329 |
| rs4766691  | 12 | 112526589 | C | 0.01111 |
| rs4767142  | 12 | 112763094 | A | 0.00267 |
| rs7138196  | 12 | 112790428 | G | 0.00902 |
| rs10850232 | 12 | 112791494 | C | 0.00720 |
| rs2279051  | 12 | 112840357 | T | 0.00987 |
| rs11066834 | 12 | 112860872 | A | 0.00569 |
| rs9668746  | 12 | 112871319 | G | 0.00850 |
| rs11066850 | 12 | 112875893 | G | 0.00791 |
| rs11066946 | 12 | 113036063 | T | 0.01372 |
| rs11066947 | 12 | 113037816 | T | 0.01478 |
| rs1560002  | 12 | 113040821 | A | 0.00662 |
| rs10082740 | 12 | 113071155 | A | 0.00531 |
| rs16943814 | 12 | 113125101 | C | 0.00073 |
| rs11067096 | 12 | 113307102 | G | 0.00451 |
| rs11611055 | 12 | 113925172 | C | 0.01652 |
| rs1566309  | 12 | 114301524 | T | 0.01163 |
| rs10850521 | 12 | 114416902 | T | 0.00253 |
| rs1874902  | 12 | 114435082 | T | 0.00360 |
| rs4767342  | 12 | 114559434 | A | 0.00891 |
| rs708812   | 12 | 114724217 | G | 0.00010 |
| rs697863   | 12 | 114735619 | G | 0.00028 |
| rs802138   | 12 | 114751157 | A | 0.00770 |
| rs11067813 | 12 | 114796285 | T | 0.00043 |
| rs4767387  | 12 | 115118553 | G | 0.00801 |
| rs16946620 | 12 | 115300622 | C | 0.00600 |
| rs11068096 | 12 | 115513943 | A | 0.01468 |
| rs816358   | 12 | 116181691 | G | 0.00173 |
| rs12307921 | 12 | 116296177 | A | 0.01166 |
| rs4766859  | 12 | 116463586 | C | 0.01179 |

|            |    |           |   |         |
|------------|----|-----------|---|---------|
| rs11068891 | 12 | 117182002 | C | 0.01522 |
| rs7966814  | 12 | 117359859 | C | 0.00891 |
| rs1402341  | 12 | 117515417 | A | 0.00339 |
| rs10851005 | 12 | 117556888 | G | 0.00605 |
| rs10851031 | 12 | 117678658 | G | 0.01410 |
| rs756750   | 12 | 118479586 | G | 0.00232 |
| rs4767835  | 12 | 118562324 | G | 0.00638 |
| rs203327   | 12 | 118689478 | T | 0.00255 |
| rs12311327 | 12 | 118959807 | G | 0.01515 |
| rs3936255  | 12 | 119031310 | T | 0.01475 |
| rs651221   | 12 | 120034006 | C | 0.00310 |
| rs618201   | 12 | 120039181 | T | 0.00797 |
| rs208290   | 12 | 120078439 | A | 0.00585 |
| rs2567982  | 12 | 120160097 | G | 0.00503 |
| rs7955747  | 12 | 120409487 | T | 0.00592 |
| rs11043196 | 12 | 120697042 | A | 0.00593 |
| rs11058797 | 12 | 121628547 | T | 0.01428 |
| rs11059100 | 12 | 121690655 | T | 0.01235 |
| rs11059258 | 12 | 121707640 | A | 0.01600 |
| rs4759438  | 12 | 121913655 | G | 0.01101 |
| rs4759384  | 12 | 121922964 | T | 0.01117 |
| rs10773005 | 12 | 122355960 | A | 0.00049 |
| rs6488920  | 12 | 123202540 | G | 0.01602 |
| rs4765359  | 12 | 123239474 | C | 0.01374 |
| rs11057556 | 12 | 123322388 | G | 0.00901 |
| rs9669274  | 12 | 123814338 | C | 0.00262 |
| rs12831105 | 12 | 123908873 | G | 0.01260 |
| rs323846   | 12 | 124445806 | C | 0.00754 |
| rs325095   | 12 | 124451257 | C | 0.01623 |
| rs10492037 | 12 | 124846692 | G | 0.00221 |
| rs7132603  | 12 | 124918806 | G | 0.01482 |
| rs10847004 | 12 | 124918954 | C | 0.00957 |
| rs10847028 | 12 | 125042245 | A | 0.01088 |
| rs7298854  | 12 | 125553390 | C | 0.00862 |
| rs10847208 | 12 | 125795459 | G | 0.01355 |
| rs1194048  | 12 | 125817067 | G | 0.00466 |
| rs4765122  | 12 | 125889975 | A | 0.00979 |
| rs2662801  | 12 | 126219867 | T | 0.00482 |
| rs1509050  | 12 | 126277369 | G | 0.01073 |
| rs971599   | 12 | 126544661 | G | 0.01311 |
| rs10128788 | 12 | 126554901 | C | 0.00973 |
| rs2682617  | 12 | 126555865 | G | 0.01511 |
| rs10744341 | 12 | 126999998 | G | 0.00267 |
| rs2730764  | 12 | 127000966 | A | 0.00234 |

|            |    |           |   |          |
|------------|----|-----------|---|----------|
| rs9705457  | 12 | 127177186 | A | 0.01055  |
| rs11059602 | 12 | 127302944 | T | 0.01002  |
| rs4882752  | 12 | 127432873 | A | 0.01411  |
| rs10847647 | 12 | 127595311 | T | 0.00074  |
| rs10773567 | 12 | 127731277 | G | 0.01158  |
| rs1385374  | 12 | 127866647 | T | 0.00933  |
| rs10847726 | 12 | 128022627 | C | 0.01332  |
| rs4964848  | 12 | 128198132 | G | 0.00525  |
| rs2172327  | 12 | 128672611 | T | 0.01132  |
| rs11060565 | 12 | 128857653 | C | 0.01212  |
| rs825879   | 12 | 128991903 | A | 0.00868  |
| rs904633   | 12 | 129171853 | G | 0.00801  |
| rs1472513  | 12 | 129296225 | A | 0.00054  |
| rs10848074 | 12 | 129352663 | T | 0.01628  |
| rs4759462  | 12 | 129476345 | G | 18.20900 |
| rs12822943 | 12 | 129574692 | C | 0.01272  |
| rs10744476 | 12 | 129693400 | C | 0.01031  |
| rs7299940  | 12 | 129956707 | G | 0.01626  |
| rs12314913 | 12 | 130078766 | T | 0.01220  |
| rs11246923 | 12 | 130651252 | C | 0.00343  |
| rs10794422 | 12 | 130748513 | T | 0.00762  |
| rs10751695 | 12 | 130857014 | C | 0.00039  |
| rs11831679 | 12 | 131175913 | T | 0.00857  |
| rs10781653 | 12 | 131893996 | A | 0.00450  |
| rs2880848  | 13 | 18212519  | C | 0.00484  |
| rs7319991  | 13 | 18598922  | A | 0.00294  |
| rs12870953 | 13 | 18737674  | T | 0.01312  |
| rs3002099  | 13 | 18999964  | T | 0.00738  |
| rs9579762  | 13 | 19482060  | A | 0.00033  |
| rs1543536  | 13 | 19506560  | T | 0.00156  |
| rs17080889 | 13 | 19837136  | T | 0.00511  |
| rs7319026  | 13 | 20125440  | G | 0.00091  |
| rs9579975  | 13 | 20393509  | G | 0.00138  |
| rs9509469  | 13 | 20425762  | A | 0.00006  |
| rs9552323  | 13 | 20473298  | A | 0.00341  |
| rs754509   | 13 | 20588867  | G | 0.01146  |
| rs9509767  | 13 | 20974829  | G | 0.00113  |
| rs7328675  | 13 | 20976174  | C | 0.00179  |
| rs9550760  | 13 | 21194721  | G | 0.01357  |
| rs1122257  | 13 | 21199079  | C | 0.00780  |
| rs9285177  | 13 | 21211165  | T | 0.00391  |
| rs7323292  | 13 | 21212101  | C | 0.00594  |
| rs3117948  | 13 | 21423846  | A | 0.01297  |
| rs3117963  | 13 | 21432122  | A | 0.01227  |

|            |    |          |   |         |
|------------|----|----------|---|---------|
| rs3129621  | 13 | 21490568 | T | 0.00823 |
| rs12716699 | 13 | 21677237 | C | 0.00552 |
| rs17076477 | 13 | 21741308 | C | 0.00739 |
| rs10870911 | 13 | 21767266 | G | 0.00178 |
| rs914069   | 13 | 22365854 | G | 0.00221 |
| rs9317422  | 13 | 22512071 | A | 0.00161 |
| rs872273   | 13 | 22573103 | G | 0.00346 |
| rs12866761 | 13 | 22965227 | A | 0.00341 |
| rs7321879  | 13 | 23377497 | G | 0.01302 |
| rs2810696  | 13 | 23460950 | G | 0.00739 |
| rs4470013  | 13 | 23537823 | T | 0.00246 |
| rs7317204  | 13 | 23603705 | G | 0.00786 |
| rs11840813 | 13 | 23616148 | A | 0.01122 |
| rs1807111  | 13 | 23943158 | C | 0.00996 |
| rs17384669 | 13 | 23948923 | G | 0.00091 |
| rs943048   | 13 | 24078246 | T | 0.01582 |
| rs7986361  | 13 | 24160942 | G | 0.00330 |
| rs9318740  | 13 | 24189876 | G | 0.00639 |
| rs41365447 | 13 | 24589022 | T | 0.01558 |
| rs17081816 | 13 | 24608667 | G | 0.01599 |
| rs9507469  | 13 | 24611365 | A | 0.01344 |
| rs9507470  | 13 | 24611522 | T | 0.00996 |
| rs12853449 | 13 | 25025890 | C | 0.01003 |
| rs9581395  | 13 | 25040342 | G | 0.00117 |
| rs7986574  | 13 | 25045098 | G | 0.00607 |
| rs9511934  | 13 | 25309084 | T | 0.00057 |
| rs9511940  | 13 | 25322692 | T | 0.00335 |
| rs1048789  | 13 | 25492700 | C | 0.01399 |
| rs9512034  | 13 | 25498688 | G | 0.00977 |
| rs7328925  | 13 | 25964253 | G | 0.01459 |
| rs549305   | 13 | 26037876 | T | 0.00790 |
| rs3897233  | 13 | 26440276 | G | 0.00056 |
| rs12867751 | 13 | 27270798 | C | 0.00988 |
| rs2388084  | 13 | 28945005 | A | 0.00737 |
| rs4262814  | 13 | 28945180 | T | 0.01645 |
| rs590377   | 13 | 29084744 | T | 0.00679 |
| rs719199   | 13 | 29287252 | G | 0.00996 |
| rs41449847 | 13 | 29382765 | G | 0.00929 |
| rs912785   | 13 | 29414728 | C | 0.00430 |
| rs17504553 | 13 | 29566989 | G | 0.01069 |
| rs9508647  | 13 | 29606574 | A | 0.01637 |
| rs1754937  | 13 | 29831368 | T | 0.01107 |
| rs17238738 | 13 | 30216068 | C | 0.00051 |
| rs4147064  | 13 | 30218118 | A | 0.00297 |

|            |    |          |   |         |
|------------|----|----------|---|---------|
| rs7998271  | 13 | 30760334 | G | 0.00053 |
| rs2056443  | 13 | 30803942 | A | 0.01523 |
| rs17076133 | 13 | 30918058 | C | 0.01134 |
| rs17076141 | 13 | 30928865 | G | 0.01172 |
| rs4943533  | 13 | 31011532 | G | 0.00632 |
| rs4943664  | 13 | 31182311 | C | 0.00701 |
| rs623441   | 13 | 31340015 | A | 0.01070 |
| rs622702   | 13 | 31340347 | C | 0.00809 |
| rs367507   | 13 | 31414037 | C | 0.01418 |
| rs2285330  | 13 | 31619615 | C | 0.00162 |
| rs798978   | 13 | 31638925 | T | 0.01161 |
| rs9315157  | 13 | 31642352 | G | 0.00172 |
| rs2428249  | 13 | 31674603 | A | 0.00603 |
| rs798987   | 13 | 31685876 | T | 0.01029 |
| rs4941701  | 13 | 32383476 | A | 0.00146 |
| rs10492401 | 13 | 32387672 | T | 0.00820 |
| rs389891   | 13 | 32458034 | C | 0.01205 |
| rs9527024  | 13 | 32525693 | A | 0.00536 |
| rs9569021  | 13 | 32675206 | T | 0.00342 |
| rs3135611  | 13 | 33304194 | G | 0.00612 |
| rs5008744  | 13 | 33345299 | T | 0.00682 |
| rs6562337  | 13 | 33637974 | G | 0.00676 |
| rs11839186 | 13 | 33691545 | A | 0.00885 |
| rs9571278  | 13 | 33715579 | A | 0.00329 |
| rs11147546 | 13 | 33754295 | A | 0.00002 |
| rs10870673 | 13 | 33854620 | C | 0.00510 |
| rs1998660  | 13 | 34023387 | G | 0.00948 |
| rs9564625  | 13 | 34224833 | G | 0.00981 |
| rs7334657  | 13 | 34229033 | G | 0.00382 |
| rs1323949  | 13 | 34329868 | C | 0.00917 |
| rs2068335  | 13 | 35252243 | T | 0.01249 |
| rs41464045 | 13 | 35529355 | A | 0.00841 |
| rs7992311  | 13 | 35870506 | C | 0.00284 |
| rs594452   | 13 | 36144675 | G | 0.01388 |
| rs4633574  | 13 | 36249756 | T | 0.00646 |
| rs7333607  | 13 | 36360010 | A | 0.00477 |
| rs12583353 | 13 | 36965575 | G | 0.00274 |
| rs1072781  | 13 | 36991541 | A | 0.00642 |
| rs17255466 | 13 | 36998807 | T | 0.00120 |
| rs7995907  | 13 | 37033780 | G | 0.00286 |
| rs9566247  | 13 | 37131370 | C | 0.01320 |
| rs2202122  | 13 | 37703926 | A | 0.00222 |
| rs7338934  | 13 | 37712629 | C | 0.01255 |
| rs693729   | 13 | 37725978 | C | 0.01285 |

|            |    |          |   |         |
|------------|----|----------|---|---------|
| rs9548385  | 13 | 38009269 | G | 0.01497 |
| rs1945495  | 13 | 38371257 | T | 0.01166 |
| rs12428445 | 13 | 38484051 | A | 0.01480 |
| rs1536342  | 13 | 38535373 | T | 0.01341 |
| rs768577   | 13 | 38813840 | A | 0.00518 |
| rs276403   | 13 | 39483832 | G | 0.00770 |
| rs9566503  | 13 | 39749098 | T | 0.00014 |
| rs2701890  | 13 | 40017231 | C | 0.00575 |
| rs4942014  | 13 | 40438502 | T | 0.01555 |
| rs9594471  | 13 | 40460786 | A | 0.00652 |
| rs9562317  | 13 | 41035059 | A | 0.00663 |
| rs7999090  | 13 | 41080493 | C | 0.01201 |
| rs11617534 | 13 | 41389479 | G | 0.00353 |
| rs7323105  | 13 | 41514967 | C | 0.01122 |
| rs9533042  | 13 | 41699654 | C | 0.01547 |
| rs238271   | 13 | 41831354 | A | 0.00997 |
| rs17457561 | 13 | 41862203 | T | 0.00514 |
| rs7987211  | 13 | 41864734 | A | 0.00365 |
| rs4942131  | 13 | 41956974 | C | 0.00239 |
| rs9525630  | 13 | 41958784 | A | 0.00374 |
| rs168312   | 13 | 42019760 | C | 0.01214 |
| rs9525641  | 13 | 42046024 | A | 0.00794 |
| rs17597366 | 13 | 42190681 | G | 0.00369 |
| rs1535902  | 13 | 42269359 | G | 0.01018 |
| rs2104352  | 13 | 42331613 | T | 0.00806 |
| rs12172797 | 13 | 42792796 | G | 0.00699 |
| rs9567151  | 13 | 42807697 | A | 0.00604 |
| rs9316052  | 13 | 43151109 | T | 0.00355 |
| rs9525835  | 13 | 43216673 | T | 0.00432 |
| rs9590787  | 13 | 43242300 | A | 0.00721 |
| rs2282062  | 13 | 43704729 | A | 0.01478 |
| rs4942352  | 13 | 44202415 | A | 0.00120 |
| rs912160   | 13 | 44217586 | C | 0.00248 |
| rs3904808  | 13 | 44235632 | G | 0.01103 |
| rs1415641  | 13 | 44240453 | C | 0.00341 |
| rs1886191  | 13 | 44525809 | G | 0.00018 |
| rs3014909  | 13 | 45015836 | T | 0.00235 |
| rs9526104  | 13 | 45193837 | G | 0.00807 |
| rs3749397  | 13 | 45298852 | T | 0.00711 |
| rs2766488  | 13 | 45361852 | G | 0.00745 |
| rs2573260  | 13 | 45409518 | G | 0.01204 |
| rs9316179  | 13 | 45539467 | C | 0.01088 |
| rs17359763 | 13 | 46328603 | G | 0.01303 |
| rs1855286  | 13 | 46644653 | A | 0.01182 |



|            |    |          |   |         |
|------------|----|----------|---|---------|
| rs7333102  | 13 | 46756652 | C | 0.01389 |
| rs9316293  | 13 | 46894461 | T | 0.00260 |
| rs41431749 | 13 | 48106921 | G | 0.00082 |
| rs3911101  | 13 | 48382578 | A | 0.01434 |
| rs7981156  | 13 | 48828370 | T | 0.00318 |
| rs9568363  | 13 | 49429768 | C | 0.01079 |
| rs7333147  | 13 | 49643972 | T | 0.01334 |
| rs2066613  | 13 | 49646219 | A | 0.01595 |
| rs2066615  | 13 | 49649759 | G | 0.01039 |
| rs1149839  | 13 | 49649964 | T | 0.01485 |
| rs2066617  | 13 | 49650483 | G | 0.01381 |
| rs2703075  | 13 | 49733969 | A | 0.00639 |
| rs9562970  | 13 | 49900616 | A | 0.01013 |
| rs2025944  | 13 | 50487102 | C | 0.00251 |
| rs2094278  | 13 | 50626208 | C | 0.00422 |
| rs7337236  | 13 | 50718345 | C | 0.00063 |
| rs2296347  | 13 | 51626424 | C | 0.00759 |
| rs7987314  | 13 | 52383154 | C | 0.01187 |
| rs2208989  | 13 | 52425974 | C | 0.00066 |
| rs4886137  | 13 | 52525355 | C | 0.00938 |
| rs9568927  | 13 | 53261422 | T | 0.01057 |
| rs1458277  | 13 | 53415541 | T | 0.01460 |
| rs2408987  | 13 | 53557313 | C | 0.00871 |
| rs7995015  | 13 | 53726962 | C | 0.00765 |
| rs1413878  | 13 | 53726985 | C | 0.00682 |
| rs7139767  | 13 | 53800590 | T | 0.01326 |
| rs3125742  | 13 | 54629926 | G | 0.00065 |
| rs1370079  | 13 | 54710942 | C | 0.00513 |
| rs1436703  | 13 | 54730139 | T | 0.01420 |
| rs7989059  | 13 | 54763118 | T | 0.00022 |
| rs681846   | 13 | 55117315 | A | 0.00323 |
| rs2315031  | 13 | 56012278 | C | 0.00588 |
| rs9537493  | 13 | 56333987 | A | 0.01013 |
| rs2152734  | 13 | 56453118 | C | 0.00462 |
| rs2777625  | 13 | 56534058 | C | 0.00685 |
| rs1412160  | 13 | 56727320 | A | 0.00243 |
| rs1936761  | 13 | 56810406 | T | 0.00512 |
| rs2186032  | 13 | 56848099 | A | 0.00829 |
| rs4886014  | 13 | 56850408 | A | 0.01040 |
| rs7339239  | 13 | 56861712 | G | 0.01115 |
| rs9569702  | 13 | 56996265 | T | 0.00618 |
| rs3012861  | 13 | 57584799 | T | 0.00069 |
| rs1538856  | 13 | 58489593 | C | 0.01027 |
| rs4886128  | 13 | 58670787 | T | 0.00757 |

|            |    |          |   |         |
|------------|----|----------|---|---------|
| rs7329285  | 13 | 58810787 | C | 0.01016 |
| rs9563740  | 13 | 59038977 | C | 0.00814 |
| rs11148489 | 13 | 59674961 | C | 0.01330 |
| rs1341844  | 13 | 59700127 | C | 0.00388 |
| rs9570276  | 13 | 59706318 | T | 0.00566 |
| rs7317551  | 13 | 59853048 | G | 0.00251 |
| rs8001190  | 13 | 60323660 | A | 0.00557 |
| rs301669   | 13 | 60334598 | G | 0.01119 |
| rs9570427  | 13 | 60514632 | C | 0.00302 |
| rs2323533  | 13 | 61260157 | T | 0.01206 |
| rs17060411 | 13 | 61321688 | T | 0.00870 |
| rs17061254 | 13 | 61815159 | A | 0.01046 |
| rs309433   | 13 | 61850417 | T | 0.00231 |
| rs7317597  | 13 | 62303084 | C | 0.00597 |
| rs4275737  | 13 | 62835135 | G | 0.00794 |
| rs17287629 | 13 | 63092156 | T | 0.00816 |
| rs7322446  | 13 | 63756181 | G | 0.00381 |
| rs1340332  | 13 | 63777356 | T | 0.00088 |
| rs7985144  | 13 | 63865034 | G | 0.00075 |
| rs7986651  | 13 | 64130590 | G | 0.00277 |
| rs7337745  | 13 | 64202016 | A | 0.01249 |
| rs2217513  | 13 | 64762990 | C | 0.00280 |
| rs957460   | 13 | 65319445 | T | 0.00771 |
| rs4883761  | 13 | 65339681 | C | 0.01654 |
| rs9529012  | 13 | 65555418 | G | 0.01405 |
| rs1407581  | 13 | 65673401 | T | 0.00434 |
| rs1322735  | 13 | 65689725 | C | 0.01478 |
| rs4884662  | 13 | 65721667 | A | 0.01536 |
| rs10459387 | 13 | 65755652 | G | 0.00790 |
| rs9540813  | 13 | 66024427 | A | 0.01252 |
| rs9540846  | 13 | 66110941 | A | 0.00120 |
| rs9529190  | 13 | 66592694 | G | 0.00991 |
| rs1889346  | 13 | 66754224 | G | 0.00272 |
| rs9541173  | 13 | 67078117 | A | 0.00142 |
| rs17083015 | 13 | 67439378 | T | 0.01598 |
| rs1416138  | 13 | 67503046 | C | 0.00714 |
| rs9541269  | 13 | 67508340 | T | 0.00664 |
| rs1241444  | 13 | 67807440 | C | 0.00252 |
| rs9317713  | 13 | 68110635 | C | 0.01114 |
| rs6650421  | 13 | 68561329 | C | 0.00236 |
| rs17086052 | 13 | 69450469 | T | 0.01022 |
| rs1441543  | 13 | 69499865 | A | 0.00629 |
| rs9599610  | 13 | 69780707 | A | 0.01631 |
| rs9599611  | 13 | 69780842 | C | 0.01657 |

|            |    |          |   |         |
|------------|----|----------|---|---------|
| rs9599636  | 13 | 69823439 | G | 0.00216 |
| rs12859922 | 13 | 69849063 | G | 0.01319 |
| rs12858938 | 13 | 69849087 | C | 0.01154 |
| rs2151491  | 13 | 69862904 | A | 0.00045 |
| rs868350   | 13 | 70016980 | T | 0.01396 |
| rs7998428  | 13 | 70666733 | A | 0.01530 |
| rs4883888  | 13 | 70678112 | A | 0.01385 |
| rs11843100 | 13 | 70892546 | G | 0.01405 |
| rs9542745  | 13 | 71220849 | T | 0.00286 |
| rs9542806  | 13 | 71481059 | A | 0.00420 |
| rs9542808  | 13 | 71486210 | C | 0.00655 |
| rs1460446  | 13 | 71505941 | C | 0.01149 |
| rs2706411  | 13 | 71517526 | C | 0.00847 |
| rs1022958  | 13 | 71559437 | C | 0.00462 |
| rs1326683  | 13 | 71570155 | C | 0.00653 |
| rs9529959  | 13 | 71571034 | C | 0.01247 |
| rs17791199 | 13 | 71574322 | A | 0.00505 |
| rs339785   | 13 | 71677638 | A | 0.00940 |
| rs568474   | 13 | 71822612 | C | 0.00830 |
| rs9599954  | 13 | 71823339 | G | 0.01286 |
| rs11839068 | 13 | 72014214 | G | 0.00716 |
| rs17089541 | 13 | 72041010 | G | 0.00582 |
| rs2031838  | 13 | 73137495 | T | 0.01224 |
| rs9573276  | 13 | 73147828 | C | 0.00360 |
| rs9530237  | 13 | 73243361 | C | 0.01329 |
| rs9565072  | 13 | 73537800 | A | 0.00824 |
| rs9593015  | 13 | 74128389 | G | 0.00775 |
| rs869877   | 13 | 74180466 | T | 0.00756 |
| rs1028794  | 13 | 74878742 | T | 0.00080 |
| rs9593130  | 13 | 75290401 | T | 0.00959 |
| rs9530473  | 13 | 75319632 | C | 0.00809 |
| rs9530500  | 13 | 75461916 | C | 0.00458 |
| rs9600681  | 13 | 75700405 | T | 0.00918 |
| rs17685818 | 13 | 75780906 | G | 0.00976 |
| rs7987244  | 13 | 75802387 | C | 0.00896 |
| rs9600699  | 13 | 75857025 | G | 0.01238 |
| rs2782991  | 13 | 75960658 | G | 0.00609 |
| rs283975   | 13 | 75974819 | T | 0.00718 |
| rs7328848  | 13 | 76261770 | C | 0.01348 |
| rs618975   | 13 | 76364236 | T | 0.00845 |
| rs9574037  | 13 | 76828377 | T | 0.00136 |
| rs10507874 | 13 | 77290759 | G | 0.00085 |
| rs2585483  | 13 | 77546024 | T | 0.00617 |
| rs17070021 | 13 | 78046684 | T | 0.00016 |

|            |    |          |   |         |
|------------|----|----------|---|---------|
| rs17070292 | 13 | 78259122 | C | 0.00578 |
| rs9544892  | 13 | 78315763 | G | 0.00420 |
| rs1372177  | 13 | 78469870 | C | 0.00486 |
| rs3910574  | 13 | 79496358 | T | 0.00001 |
| rs9545302  | 13 | 79500112 | A | 0.00250 |
| rs9545411  | 13 | 79824658 | C | 0.00084 |
| rs6650455  | 13 | 79857101 | T | 0.01191 |
| rs1772580  | 13 | 80084744 | T | 0.00741 |
| rs4379965  | 13 | 80391966 | C | 0.01294 |
| rs4312196  | 13 | 80392312 | T | 0.00939 |
| rs2478216  | 13 | 80394914 | C | 0.00435 |
| rs1333420  | 13 | 80654428 | C | 0.01359 |
| rs9545673  | 13 | 80891072 | T | 0.00252 |
| rs261446   | 13 | 81198982 | T | 0.00979 |
| rs1386707  | 13 | 82358590 | A | 0.00201 |
| rs1906327  | 13 | 82455235 | C | 0.01508 |
| rs9546594  | 13 | 83553225 | A | 0.01558 |
| rs4303371  | 13 | 83699592 | G | 0.00854 |
| rs9602431  | 13 | 83759840 | T | 0.00464 |
| rs9531642  | 13 | 84149640 | T | 0.00701 |
| rs9575699  | 13 | 84446595 | A | 0.01301 |
| rs12866503 | 13 | 84765153 | A | 0.00250 |
| rs17354288 | 13 | 84788717 | G | 0.01151 |
| rs9547249  | 13 | 84991717 | G | 0.01400 |
| rs9520260  | 13 | 87780609 | C | 0.01451 |
| rs10507973 | 13 | 88037911 | G | 0.00319 |
| rs4483720  | 13 | 88039407 | C | 0.01078 |
| rs4773046  | 13 | 88057930 | A | 0.01143 |
| rs1536355  | 13 | 88067963 | A | 0.00412 |
| rs1326426  | 13 | 88073196 | A | 0.00902 |
| rs9521628  | 13 | 88099356 | C | 0.00766 |
| rs9521690  | 13 | 88114373 | G | 0.01513 |
| rs41478745 | 13 | 88382923 | G | 0.00988 |
| rs11069912 | 13 | 88471180 | T | 0.00951 |
| rs9522430  | 13 | 88534365 | T | 0.00133 |
| rs9588713  | 13 | 89119923 | G | 0.01133 |
| rs2153718  | 13 | 89370256 | A | 0.00517 |
| rs2805665  | 13 | 89491459 | A | 0.01050 |
| rs12867513 | 13 | 89727003 | C | 0.01177 |
| rs9560600  | 13 | 89727127 | G | 0.01318 |
| rs9515763  | 13 | 89960370 | C | 0.00193 |
| rs16945688 | 13 | 90716800 | T | 0.00109 |
| rs1330469  | 13 | 91346842 | C | 0.00148 |
| rs9301773  | 13 | 91494163 | G | 0.00998 |

|            |    |          |   |         |
|------------|----|----------|---|---------|
| rs7993910  | 13 | 91557014 | C | 0.01485 |
| rs9560983  | 13 | 91674934 | A | 0.01116 |
| rs9561026  | 13 | 91823052 | T | 0.00417 |
| rs2209834  | 13 | 91865069 | C | 0.00565 |
| rs696931   | 13 | 92516009 | A | 0.01587 |
| rs1838355  | 13 | 92521689 | A | 0.00798 |
| rs1444231  | 13 | 92525871 | C | 0.01026 |
| rs1887708  | 13 | 92686244 | A | 0.01583 |
| rs9524070  | 13 | 92898105 | A | 0.01250 |
| rs1562190  | 13 | 93020321 | C | 0.00102 |
| rs6492702  | 13 | 93841787 | C | 0.01664 |
| rs7337871  | 13 | 94144182 | G | 0.00025 |
| rs17196506 | 13 | 94317286 | C | 0.00574 |
| rs16950278 | 13 | 94331307 | C | 0.01639 |
| rs9590101  | 13 | 94341946 | G | 0.00499 |
| rs9590106  | 13 | 94349071 | A | 0.00489 |
| rs9590108  | 13 | 94349285 | G | 0.01601 |
| rs2148058  | 13 | 94350366 | G | 0.01617 |
| rs2182263  | 13 | 94350426 | A | 0.01397 |
| rs9302014  | 13 | 94351657 | A | 0.00120 |
| rs9561719  | 13 | 94357429 | G | 0.01394 |
| rs1925857  | 13 | 94385074 | C | 0.01002 |
| rs9524711  | 13 | 94410370 | T | 0.01457 |
| rs7995795  | 13 | 95020532 | G | 0.00561 |
| rs9561965  | 13 | 95297574 | G | 0.01181 |
| rs7990583  | 13 | 95863471 | T | 0.00313 |
| rs16953447 | 13 | 95929422 | C | 0.00841 |
| rs16953634 | 13 | 96332224 | C | 0.01034 |
| rs9513199  | 13 | 96443969 | G | 0.00730 |
| rs9516802  | 13 | 96455117 | G | 0.00794 |
| rs4456365  | 13 | 96616515 | T | 0.00482 |
| rs1316549  | 13 | 96764269 | T | 0.00364 |
| rs6491350  | 13 | 96805016 | C | 0.00431 |
| rs16954076 | 13 | 96852593 | T | 0.00857 |
| rs7339318  | 13 | 97250777 | G | 0.00155 |
| rs7326592  | 13 | 97511170 | T | 0.01572 |
| rs12875913 | 13 | 97569539 | G | 0.00183 |
| rs9554468  | 13 | 97880603 | C | 0.00327 |
| rs9556972  | 13 | 98007816 | T | 0.00122 |
| rs4578508  | 13 | 98096707 | A | 0.01260 |
| rs2184903  | 13 | 98096810 | G | 0.00345 |
| rs9554486  | 13 | 98103632 | G | 0.01165 |
| rs4412849  | 13 | 98113794 | A | 0.00776 |
| rs9557025  | 13 | 98120753 | A | 0.00933 |

|            |    |           |   |         |
|------------|----|-----------|---|---------|
| rs3782999  | 13 | 98168486  | C | 0.01321 |
| rs2296999  | 13 | 98348352  | A | 0.00467 |
| rs2182885  | 13 | 98653125  | A | 0.00084 |
| rs4772214  | 13 | 98953078  | G | 0.00246 |
| rs9557247  | 13 | 98967826  | T | 0.01242 |
| rs9585118  | 13 | 98988505  | C | 0.00083 |
| rs9585127  | 13 | 99003333  | T | 0.00583 |
| rs9554617  | 13 | 99065193  | T | 0.00680 |
| rs7991210  | 13 | 99549906  | A | 0.00404 |
| rs4772342  | 13 | 100370899 | A | 0.00538 |
| rs1886853  | 13 | 100428464 | C | 0.00558 |
| rs12583815 | 13 | 100438101 | G | 0.00125 |
| rs2765320  | 13 | 100465089 | C | 0.00052 |
| rs659272   | 13 | 100501882 | T | 0.00999 |
| rs16959621 | 13 | 101470203 | T | 0.00011 |
| rs537642   | 13 | 101603591 | A | 0.01403 |
| rs1360985  | 13 | 101721943 | A | 9.75800 |
| rs1415057  | 13 | 101724665 | G | 0.00650 |
| rs1336664  | 13 | 101752488 | T | 0.00193 |
| rs17506875 | 13 | 102045515 | T | 0.00889 |
| rs701559   | 13 | 102413583 | G | 0.01139 |
| rs7322528  | 13 | 102430390 | C | 0.00015 |
| rs7327964  | 13 | 102784286 | T | 0.01087 |
| rs1571628  | 13 | 102888167 | C | 0.00772 |
| rs9300855  | 13 | 103152012 | C | 0.01307 |
| rs9558198  | 13 | 103334252 | G | 0.00074 |
| rs16963727 | 13 | 103347771 | C | 0.00319 |
| rs2806805  | 13 | 103370723 | T | 0.01542 |
| rs16964387 | 13 | 103679979 | G | 0.01134 |
| rs7322187  | 13 | 103914442 | C | 0.00374 |
| rs9586517  | 13 | 103914702 | A | 0.01201 |
| rs9514269  | 13 | 103921100 | A | 0.01577 |
| rs9300934  | 13 | 103933101 | T | 0.00550 |
| rs9582875  | 13 | 103938575 | T | 0.01544 |
| rs9519381  | 13 | 104019769 | A | 0.00161 |
| rs930268   | 13 | 104050671 | A | 0.00376 |
| rs4772641  | 13 | 104279301 | T | 0.01232 |
| rs7139453  | 13 | 104515664 | A | 0.01184 |
| rs7316970  | 13 | 104515799 | C | 0.01468 |
| rs3916959  | 13 | 104640379 | C | 0.00908 |
| rs11618600 | 13 | 104954122 | G | 0.00597 |
| rs1981272  | 13 | 104968003 | T | 0.01012 |
| rs4523809  | 13 | 105159394 | G | 0.01530 |
| rs9519746  | 13 | 105159963 | C | 0.00208 |

|            |    |           |   |         |
|------------|----|-----------|---|---------|
| rs10508164 | 13 | 105200821 | A | 0.00223 |
| rs2476760  | 13 | 105288687 | T | 0.01212 |
| rs2476761  | 13 | 105311957 | C | 0.00105 |
| rs7318970  | 13 | 105371531 | T | 0.00116 |
| rs17519864 | 13 | 105490805 | A | 0.00601 |
| rs7328698  | 13 | 105939350 | G | 0.01616 |
| rs7328882  | 13 | 105939434 | T | 0.01639 |
| rs4772857  | 13 | 106615670 | A | 0.00827 |
| rs1927767  | 13 | 106618191 | A | 0.01456 |
| rs7317693  | 13 | 106648992 | T | 0.00598 |
| rs750094   | 13 | 106666491 | C | 0.00088 |
| rs957788   | 13 | 107055221 | C | 0.00026 |
| rs2391610  | 13 | 107468407 | G | 0.01558 |
| rs12861715 | 13 | 107801346 | T | 0.00817 |
| rs16972960 | 13 | 108157692 | T | 0.01304 |
| rs7997299  | 13 | 108624329 | A | 0.00245 |
| rs7490337  | 13 | 108850730 | A | 0.01659 |
| rs7997265  | 13 | 109091458 | G | 0.01174 |
| rs12865636 | 13 | 109097925 | A | 0.00980 |
| rs1029204  | 13 | 109479213 | T | 0.01213 |
| rs11069820 | 13 | 109512669 | T | 0.01201 |
| rs1886871  | 13 | 110001418 | G | 0.00279 |
| rs7394     | 13 | 110090045 | C | 0.00005 |
| rs445490   | 13 | 110104108 | G | 0.00732 |
| rs7323834  | 13 | 110252125 | A | 0.00164 |
| rs7319972  | 13 | 110254929 | A | 0.01186 |
| rs9522028  | 13 | 110413710 | T | 0.00549 |
| rs7317887  | 13 | 110455200 | C | 0.01529 |
| rs8000668  | 13 | 110466673 | C | 0.00243 |
| rs9559946  | 13 | 110498107 | A | 0.01663 |
| rs12860209 | 13 | 110823973 | A | 0.01522 |
| rs9560136  | 13 | 111062615 | A | 0.01387 |
| rs2318060  | 13 | 111586106 | G | 0.00166 |
| rs9577645  | 13 | 111893886 | T | 0.00977 |
| rs7324712  | 13 | 112080916 | C | 0.01068 |
| rs10816    | 13 | 112101471 | A | 0.00404 |
| rs9550070  | 13 | 112101811 | G | 0.00579 |
| rs4907533  | 13 | 112199342 | C | 0.01345 |
| rs9577814  | 13 | 112273716 | C | 0.00188 |
| rs9604441  | 13 | 112485261 | C | 0.01429 |
| rs4907584  | 13 | 112775615 | G | 0.00765 |
| rs4150729  | 13 | 113313306 | G | 0.01034 |
| rs9590464  | 13 | 113941987 | G | 0.01440 |
| rs7983955  | 13 | 113968129 | T | 0.00394 |

|            |    |          |   |         |
|------------|----|----------|---|---------|
| rs1780870  | 14 | 19362325 | G | 0.01269 |
| rs10130102 | 14 | 19362693 | T | 0.00728 |
| rs7156327  | 14 | 19648010 | G | 0.01195 |
| rs1188561  | 14 | 19725306 | A | 0.01585 |
| rs1760955  | 14 | 19957802 | C | 0.00244 |
| rs12436843 | 14 | 19961438 | T | 0.00672 |
| rs8004317  | 14 | 20249121 | G | 0.01069 |
| rs11156644 | 14 | 20271429 | A | 0.00997 |
| rs11848221 | 14 | 20299145 | G | 0.00950 |
| rs10483253 | 14 | 21171249 | G | 0.01050 |
| rs17255021 | 14 | 21369821 | C | 0.00292 |
| rs932230   | 14 | 21536574 | T | 0.00812 |
| rs932231   | 14 | 21536724 | G | 0.00833 |
| rs11625840 | 14 | 21697688 | A | 0.00833 |
| rs9323108  | 14 | 21723598 | C | 0.00410 |
| rs4981415  | 14 | 21784072 | G | 0.00527 |
| rs11157474 | 14 | 21784363 | G | 0.01616 |
| rs17115728 | 14 | 21785191 | G | 0.01335 |
| rs10142543 | 14 | 21933450 | G | 0.00870 |
| rs5742875  | 14 | 22103383 | C | 0.01100 |
| rs1753429  | 14 | 22172624 | G | 0.00307 |
| rs4982676  | 14 | 22347843 | A | 0.01389 |
| rs7157021  | 14 | 22668792 | C | 0.00416 |
| rs3729829  | 14 | 22955727 | T | 0.01374 |
| rs17093091 | 14 | 23024732 | T | 0.00080 |
| rs854431   | 14 | 24300984 | T | 0.01423 |
| rs854379   | 14 | 24339998 | T | 0.00795 |
| rs2480354  | 14 | 24406061 | T | 0.00587 |
| rs17109366 | 14 | 24498867 | C | 0.00488 |
| rs17109462 | 14 | 24536305 | A | 0.00316 |
| rs10151968 | 14 | 24538105 | A | 0.00082 |
| rs17257822 | 14 | 24615166 | T | 0.00795 |
| rs11159287 | 14 | 24960206 | G | 0.00413 |
| rs4140868  | 14 | 25669332 | C | 0.01242 |
| rs12888264 | 14 | 25846016 | A | 0.00710 |
| rs11627156 | 14 | 26195356 | C | 0.01118 |
| rs17112954 | 14 | 27184481 | A | 0.00322 |
| rs17113090 | 14 | 27269306 | A | 0.00700 |
| rs2180890  | 14 | 27943078 | C | 0.00784 |
| rs1955440  | 14 | 28338910 | G | 0.01329 |
| rs17114622 | 14 | 28747626 | T | 0.00761 |
| rs4981696  | 14 | 28781556 | T | 0.00293 |
| rs12893007 | 14 | 28969436 | A | 0.00029 |
| rs1191566  | 14 | 29039352 | T | 0.00134 |



|            |    |          |   |          |
|------------|----|----------|---|----------|
| rs17096419 | 14 | 29748277 | C | 0.01484  |
| rs11629275 | 14 | 29749441 | G | 0.00640  |
| rs7148020  | 14 | 29834938 | G | 0.01144  |
| rs10144249 | 14 | 29993122 | G | 0.00652  |
| rs4981770  | 14 | 30265856 | C | 0.01565  |
| rs9322887  | 14 | 31560104 | A | 0.00860  |
| rs4982063  | 14 | 32794582 | C | 0.01169  |
| rs11851892 | 14 | 32921165 | A | 0.00089  |
| rs1609496  | 14 | 32931905 | T | 0.00093  |
| rs17101083 | 14 | 32965666 | T | 0.01095  |
| rs10498318 | 14 | 33249118 | C | 0.01446  |
| rs8017055  | 14 | 33312734 | T | 0.01128  |
| rs12895061 | 14 | 33316845 | A | 0.01575  |
| rs11628377 | 14 | 33321966 | A | 0.00112  |
| rs4146554  | 14 | 33353940 | C | 0.00702  |
| rs10132973 | 14 | 33594964 | T | 0.00305  |
| rs1652947  | 14 | 33664812 | A | 0.01336  |
| rs2210068  | 14 | 33808322 | G | 0.00992  |
| rs7151133  | 14 | 34039157 | T | 0.00703  |
| rs4981250  | 14 | 34324224 | C | 12.88600 |
| rs2273158  | 14 | 34535535 | A | 0.01267  |
| rs3138053  | 14 | 34944605 | A | 0.00665  |
| rs6571727  | 14 | 35210859 | A | 0.00210  |
| rs9944080  | 14 | 35496774 | A | 0.00078  |
| rs376927   | 14 | 35617682 | A | 0.00642  |
| rs11622332 | 14 | 36159780 | G | 0.00181  |
| rs1955753  | 14 | 36189652 | G | 0.00930  |
| rs6571755  | 14 | 36190727 | T | 0.00407  |
| rs7148646  | 14 | 36476787 | A | 0.00883  |
| rs2006729  | 14 | 36937036 | C | 0.01234  |
| rs11156974 | 14 | 37427615 | G | 0.00646  |
| rs2415456  | 14 | 37714254 | C | 0.01562  |
| rs2415458  | 14 | 37715384 | G | 0.00166  |
| rs2899868  | 14 | 37715734 | G | 0.00194  |
| rs10147944 | 14 | 37717436 | A | 0.00017  |
| rs7145965  | 14 | 37874184 | T | 0.00699  |
| rs11157003 | 14 | 38013117 | A | 0.00179  |
| rs4400953  | 14 | 38307865 | T | 0.00065  |
| rs17108552 | 14 | 38447512 | T | 0.00034  |
| rs8014887  | 14 | 38604340 | A | 0.00376  |
| rs4902622  | 14 | 38958523 | C | 0.00761  |
| rs2057137  | 14 | 39013292 | T | 0.01630  |
| rs17769386 | 14 | 39309123 | C | 0.00503  |
| rs10134529 | 14 | 39478291 | G | 0.01480  |

|            |    |          |   |         |
|------------|----|----------|---|---------|
| rs11623348 | 14 | 39693349 | T | 0.00366 |
| rs1569790  | 14 | 39885471 | T | 0.00527 |
| rs4903754  | 14 | 39935520 | C | 0.00282 |
| rs8181915  | 14 | 39949725 | G | 0.01261 |
| rs7156053  | 14 | 39998166 | T | 0.01311 |
| rs12587411 | 14 | 40094252 | A | 0.01025 |
| rs12889656 | 14 | 40566277 | A | 0.00260 |
| rs4304945  | 14 | 41290670 | A | 0.00012 |
| rs2031271  | 14 | 41414572 | C | 0.00975 |
| rs17181811 | 14 | 41443589 | G | 0.00800 |
| rs1684689  | 14 | 41514751 | G | 0.01239 |
| rs1763302  | 14 | 41598712 | G | 0.01540 |
| rs17113572 | 14 | 42397240 | T | 0.01605 |
| rs17113932 | 14 | 42681506 | G | 0.01258 |
| rs2807800  | 14 | 42747818 | A | 0.00446 |
| rs17114079 | 14 | 42827908 | T | 0.01427 |
| rs2029727  | 14 | 42896754 | C | 0.00649 |
| rs1952381  | 14 | 43427391 | A | 0.01455 |
| rs7153093  | 14 | 43604910 | T | 0.00279 |
| rs8011828  | 14 | 44407452 | G | 0.00892 |
| rs6572324  | 14 | 45380752 | A | 0.01521 |
| rs12148021 | 14 | 45457913 | C | 0.00825 |
| rs762015   | 14 | 45505234 | G | 0.00542 |
| rs1951317  | 14 | 45521429 | T | 0.01189 |
| rs11849729 | 14 | 45564779 | A | 0.01584 |
| rs9805956  | 14 | 45565893 | A | 0.00517 |
| rs1957190  | 14 | 45567885 | A | 0.00174 |
| rs4491418  | 14 | 45575579 | G | 0.01175 |
| rs1957187  | 14 | 45580798 | A | 0.00629 |
| rs17574942 | 14 | 46802994 | A | 0.00125 |
| rs10467790 | 14 | 46979994 | G | 0.00490 |
| rs1879518  | 14 | 47492093 | C | 0.00463 |
| rs1769526  | 14 | 47842679 | T | 0.00588 |
| rs6572520  | 14 | 48369944 | A | 0.00164 |
| rs7493522  | 14 | 48874931 | T | 0.01061 |
| rs17698128 | 14 | 48899235 | G | 0.00248 |
| rs12590483 | 14 | 48985385 | G | 0.00965 |
| rs10483556 | 14 | 49029992 | A | 0.01275 |
| rs8009047  | 14 | 49038646 | A | 0.01647 |
| rs7145941  | 14 | 49056851 | T | 0.01376 |
| rs3100876  | 14 | 49442927 | G | 0.00743 |
| rs7155791  | 14 | 49487980 | T | 0.00649 |
| rs3825575  | 14 | 49536269 | T | 0.01306 |
| rs7146139  | 14 | 50320907 | C | 0.00789 |

|            |    |          |   |         |
|------------|----|----------|---|---------|
| rs1959527  | 14 | 50442083 | G | 0.00294 |
| rs10483607 | 14 | 50533072 | C | 0.00995 |
| rs12147302 | 14 | 51330913 | T | 0.00125 |
| rs4901265  | 14 | 51806327 | G | 0.00264 |
| rs4898758  | 14 | 51806518 | G | 0.01261 |
| rs34246750 | 14 | 51938507 | C | 0.00288 |
| rs11157928 | 14 | 52220940 | T | 0.01000 |
| rs9989200  | 14 | 52542080 | A | 0.01543 |
| rs1255320  | 14 | 52886261 | A | 0.00178 |
| rs1255281  | 14 | 52898072 | G | 0.00036 |
| rs11157980 | 14 | 53380347 | T | 0.00715 |
| rs6572927  | 14 | 53503140 | T | 0.00360 |
| rs7159423  | 14 | 54150084 | C | 0.01141 |
| rs8018800  | 14 | 54523056 | T | 0.00068 |
| rs8019080  | 14 | 54961125 | T | 0.01504 |
| rs11851435 | 14 | 54991314 | G | 0.00902 |
| rs10483647 | 14 | 55173635 | G | 0.01411 |
| rs12323476 | 14 | 55242475 | T | 0.00239 |
| rs17090962 | 14 | 55624732 | A | 0.01033 |
| rs17090964 | 14 | 55624828 | C | 0.00436 |
| rs7153608  | 14 | 55634972 | G | 0.01341 |
| rs8009841  | 14 | 55801045 | C | 0.01071 |
| rs17769866 | 14 | 55859466 | C | 0.01422 |
| rs4553529  | 14 | 56098231 | C | 0.00427 |
| rs12436338 | 14 | 56200540 | A | 0.00105 |
| rs12435979 | 14 | 56307190 | C | 0.01596 |
| rs12436671 | 14 | 56307786 | A | 0.01471 |
| rs198228   | 14 | 56312173 | T | 0.00804 |
| rs2104718  | 14 | 56395127 | A | 0.00916 |
| rs709969   | 14 | 56461686 | G | 0.00632 |
| rs8021033  | 14 | 57000298 | A | 0.01398 |
| rs8021172  | 14 | 57000360 | T | 0.00316 |
| rs1152522  | 14 | 57018133 | C | 0.00825 |
| rs17795775 | 14 | 57068620 | G | 0.00674 |
| rs4901827  | 14 | 57373556 | T | 0.01143 |
| rs17093847 | 14 | 57429212 | A | 0.00984 |
| rs17093849 | 14 | 57429606 | T | 0.01134 |
| rs17094355 | 14 | 57643132 | A | 0.01167 |
| rs710018   | 14 | 58233376 | A | 0.01533 |
| rs177727   | 14 | 58447201 | T | 0.00114 |
| rs10141742 | 14 | 58475842 | C | 0.01122 |
| rs2882029  | 14 | 58494767 | G | 0.00403 |
| rs1950682  | 14 | 58526297 | T | 0.00825 |
| rs17095853 | 14 | 58740427 | C | 0.01505 |

|            |    |          |   |         |
|------------|----|----------|---|---------|
| rs17833810 | 14 | 58767499 | A | 0.00309 |
| rs17095965 | 14 | 58794834 | G | 0.01485 |
| rs17096006 | 14 | 58810870 | C | 0.00289 |
| rs7155203  | 14 | 58817716 | C | 6.24600 |
| rs8181987  | 14 | 58820238 | C | 0.01470 |
| rs3850302  | 14 | 58927330 | T | 0.00563 |
| rs17255787 | 14 | 59022654 | G | 0.01260 |
| rs2182140  | 14 | 59219012 | G | 0.00707 |
| rs12897336 | 14 | 59385633 | G | 0.01221 |
| rs17310036 | 14 | 59394703 | G | 0.00688 |
| rs10483722 | 14 | 59496656 | G | 0.00778 |
| rs188620   | 14 | 59758931 | C | 0.00891 |
| rs12323784 | 14 | 59818533 | T | 0.01208 |
| rs10150234 | 14 | 60101037 | G | 0.00002 |
| rs4899015  | 14 | 60195789 | A | 0.00419 |
| rs1018457  | 14 | 60228623 | G | 0.01451 |
| rs2882684  | 14 | 60486215 | T | 0.01375 |
| rs912618   | 14 | 61003344 | C | 0.00661 |
| rs12883769 | 14 | 61060614 | A | 0.00044 |
| rs2105073  | 14 | 61100961 | G | 0.00709 |
| rs798788   | 14 | 61108248 | G | 0.00061 |
| rs8005664  | 14 | 61600389 | G | 0.00885 |
| rs10147559 | 14 | 61658369 | C | 0.00047 |
| rs2078082  | 14 | 61936786 | G | 0.00477 |
| rs4902147  | 14 | 62063692 | A | 0.00631 |
| rs8004475  | 14 | 62202285 | T | 0.00765 |
| rs1950987  | 14 | 62569493 | A | 0.00848 |
| rs7152965  | 14 | 62711170 | T | 0.00003 |
| rs762102   | 14 | 62748675 | C | 0.00242 |
| rs9323443  | 14 | 63478768 | G | 0.01073 |
| rs1262235  | 14 | 63483936 | G | 0.01535 |
| rs1255971  | 14 | 63604909 | C | 0.00497 |
| rs17101651 | 14 | 63631077 | G | 0.01441 |
| rs1109608  | 14 | 64300706 | A | 0.01206 |
| rs17826231 | 14 | 64365352 | C | 0.00690 |
| rs2898885  | 14 | 64491027 | A | 0.01323 |
| rs4499147  | 14 | 64511314 | A | 0.01496 |
| rs2268962  | 14 | 65217026 | T | 0.00294 |
| rs7142317  | 14 | 65472901 | C | 0.00809 |
| rs7145321  | 14 | 65507316 | G | 0.00365 |
| rs1147441  | 14 | 65539347 | G | 0.01151 |
| rs1838332  | 14 | 65587002 | C | 0.00039 |
| rs8005105  | 14 | 65824990 | A | 0.00089 |
| rs8020532  | 14 | 65956469 | A | 0.00100 |

|            |    |          |   |         |
|------------|----|----------|---|---------|
| rs8022328  | 14 | 66322788 | A | 0.00063 |
| rs8006273  | 14 | 67066476 | A | 0.00445 |
| rs9449     | 14 | 67283166 | G | 0.00013 |
| rs11158693 | 14 | 67311014 | G | 0.00632 |
| rs8018477  | 14 | 67902720 | A | 0.01391 |
| rs1885014  | 14 | 67914548 | G | 0.01488 |
| rs3784119  | 14 | 67944813 | G | 0.00255 |
| rs1956534  | 14 | 67963825 | G | 0.00205 |
| rs4902602  | 14 | 68111085 | G | 0.00584 |
| rs8011558  | 14 | 68333094 | C | 0.01665 |
| rs9323521  | 14 | 68622880 | A | 0.00455 |
| rs2001355  | 14 | 68630946 | G | 0.00278 |
| rs2105269  | 14 | 68816987 | C | 0.01321 |
| rs8019166  | 14 | 69309679 | T | 0.01440 |
| rs149250   | 14 | 69599208 | C | 0.01258 |
| rs150951   | 14 | 69605628 | C | 0.01337 |
| rs150950   | 14 | 69605652 | A | 0.01002 |
| rs150949   | 14 | 69605686 | C | 0.01221 |
| rs150948   | 14 | 69605873 | C | 0.01503 |
| rs12883784 | 14 | 69617703 | C | 0.01162 |
| rs4331283  | 14 | 69809307 | T | 0.00833 |
| rs1060681  | 14 | 69906506 | A | 0.00445 |
| rs2332431  | 14 | 70145604 | G | 0.01586 |
| rs4902846  | 14 | 70288963 | A | 0.00476 |
| rs4902852  | 14 | 70302669 | C | 0.00679 |
| rs7155910  | 14 | 70344430 | T | 0.00689 |
| rs1024512  | 14 | 70379416 | A | 0.00638 |
| rs11848070 | 14 | 70577354 | T | 0.00670 |
| rs7158714  | 14 | 70700015 | C | 0.01463 |
| rs7161176  | 14 | 72047594 | C | 0.01039 |
| rs11628539 | 14 | 72077931 | T | 0.00117 |
| rs2333022  | 14 | 72569867 | G | 0.00591 |
| rs362341   | 14 | 72711211 | T | 0.00047 |
| rs17094045 | 14 | 73466004 | T | 0.00230 |
| rs4646859  | 14 | 73618001 | G | 0.01199 |
| rs4899530  | 14 | 74235578 | A | 0.00791 |
| rs6574189  | 14 | 74236246 | T | 0.01204 |
| rs17782683 | 14 | 74237459 | G | 0.00336 |
| rs732765   | 14 | 74435482 | A | 0.01202 |
| rs1008436  | 14 | 74856838 | C | 0.00689 |
| rs12431544 | 14 | 74899572 | G | 0.00027 |
| rs12590700 | 14 | 74899937 | C | 0.00190 |
| rs8006018  | 14 | 74901110 | C | 0.01195 |
| rs7153959  | 14 | 75663607 | G | 0.00444 |

|            |    |          |   |         |
|------------|----|----------|---|---------|
| rs935334   | 14 | 75683431 | A | 0.00553 |
| rs1900125  | 14 | 75727223 | G | 0.00979 |
| rs11623322 | 14 | 75855290 | T | 0.01556 |
| rs7150681  | 14 | 75872362 | T | 0.00500 |
| rs8021398  | 14 | 75916679 | C | 0.00991 |
| rs1642821  | 14 | 76137298 | G | 0.01356 |
| rs1467375  | 14 | 76401158 | C | 0.00764 |
| rs388764   | 14 | 76762509 | A | 0.00518 |
| rs2049818  | 14 | 77723325 | C | 0.00615 |
| rs10133718 | 14 | 78268121 | G | 0.00269 |
| rs31420    | 14 | 78499684 | C | 0.01208 |
| rs17108429 | 14 | 78500348 | A | 0.00604 |
| rs7153625  | 14 | 79119015 | A | 0.01239 |
| rs221492   | 14 | 79161922 | T | 0.01298 |
| rs8011654  | 14 | 79343602 | C | 0.00055 |
| rs10483937 | 14 | 79443521 | T | 0.01514 |
| rs1534835  | 14 | 79452128 | T | 0.00214 |
| rs17175981 | 14 | 79604883 | C | 0.01080 |
| rs1388382  | 14 | 79654454 | G | 0.00808 |
| rs2267873  | 14 | 79743567 | T | 0.01611 |
| rs2295138  | 14 | 79813376 | C | 0.01051 |
| rs9989235  | 14 | 79837480 | G | 0.00320 |
| rs2160355  | 14 | 79841000 | C | 0.00950 |
| rs10142839 | 14 | 79947871 | G | 0.00313 |
| rs6574600  | 14 | 80213895 | G | 0.01636 |
| rs917986   | 14 | 80540408 | G | 0.00732 |
| rs6574663  | 14 | 81122839 | A | 0.00738 |
| rs17116374 | 14 | 81668270 | T | 0.00726 |
| rs1242558  | 14 | 82305174 | A | 0.00900 |
| rs17118771 | 14 | 83058938 | C | 0.00806 |
| rs945347   | 14 | 83159821 | T | 0.00351 |
| rs1952530  | 14 | 83253775 | A | 0.00465 |
| rs8020352  | 14 | 83287890 | A | 0.00922 |
| rs17119232 | 14 | 83429313 | A | 0.00706 |
| rs7157753  | 14 | 83515016 | T | 0.01130 |
| rs8006640  | 14 | 83979059 | A | 0.01011 |
| rs12883344 | 14 | 83981301 | C | 0.00571 |
| rs1375450  | 14 | 83994725 | A | 0.00870 |
| rs2765912  | 14 | 84245069 | C | 0.00804 |
| rs1667507  | 14 | 84773762 | A | 0.01413 |
| rs17710010 | 14 | 85051048 | A | 0.00075 |
| rs12897255 | 14 | 85288372 | C | 0.01541 |
| rs17730580 | 14 | 85291664 | G | 0.00402 |
| rs8003269  | 14 | 85306119 | C | 0.01388 |

|            |    |          |   |         |
|------------|----|----------|---|---------|
| rs17736583 | 14 | 85321268 | G | 0.01154 |
| rs11851223 | 14 | 85335323 | G | 9.86200 |
| rs10149765 | 14 | 85789333 | T | 0.00126 |
| rs2135102  | 14 | 85796095 | A | 0.00670 |
| rs4899891  | 14 | 85796535 | G | 0.00283 |
| rs1505163  | 14 | 85813242 | G | 0.00058 |
| rs7144626  | 14 | 85817489 | G | 0.00591 |
| rs17684800 | 14 | 85986767 | C | 0.00005 |
| rs17259285 | 14 | 86443584 | T | 0.00414 |
| rs12893295 | 14 | 86763989 | G | 0.00922 |
| rs2163315  | 14 | 86949005 | G | 0.00041 |
| rs8014135  | 14 | 87119520 | C | 0.00158 |
| rs12435864 | 14 | 87398733 | A | 0.00285 |
| rs10484007 | 14 | 88452101 | C | 0.00481 |
| rs17716878 | 14 | 88750773 | C | 0.00856 |
| rs7148718  | 14 | 89322362 | G | 0.01488 |
| rs17260618 | 14 | 89650740 | C | 0.01147 |
| rs2282031  | 14 | 89800696 | G | 0.00962 |
| rs10129175 | 14 | 89954662 | T | 0.00728 |
| rs2215719  | 14 | 90007493 | T | 0.01453 |
| rs1286293  | 14 | 90380657 | T | 0.01065 |
| rs11622397 | 14 | 90410446 | A | 0.00849 |
| rs7143288  | 14 | 91407630 | T | 0.00782 |
| rs11160057 | 14 | 91866998 | A | 0.01085 |
| rs11628803 | 14 | 92140517 | A | 0.00118 |
| rs2146498  | 14 | 92142022 | C | 0.01520 |
| rs4904964  | 14 | 92169620 | T | 0.01387 |
| rs17748637 | 14 | 92416199 | C | 0.01117 |
| rs17128706 | 14 | 92508104 | A | 0.00376 |
| rs12586978 | 14 | 93111973 | C | 0.00582 |
| rs8012955  | 14 | 93450660 | G | 0.00679 |
| rs11160168 | 14 | 93846154 | T | 0.01009 |
| rs1950654  | 14 | 93875164 | G | 0.00209 |
| rs1016686  | 14 | 93908993 | A | 0.00804 |
| rs1243167  | 14 | 93911394 | A | 0.01424 |
| rs2753934  | 14 | 93921083 | G | 0.00289 |
| rs8008729  | 14 | 94019874 | C | 0.00686 |
| rs12589932 | 14 | 94020846 | C | 0.00850 |
| rs4900233  | 14 | 94026811 | T | 0.01314 |
| rs8012043  | 14 | 94033174 | T | 0.01089 |
| rs10149025 | 14 | 94130789 | G | 0.00731 |
| rs10136944 | 14 | 94930040 | T | 0.01030 |
| rs878599   | 14 | 95016128 | T | 0.00931 |
| rs10131473 | 14 | 95075769 | G | 0.00844 |

|            |    |           |   |         |
|------------|----|-----------|---|---------|
| rs2296311  | 14 | 95247926  | C | 0.00031 |
| rs1984968  | 14 | 95251335  | T | 0.01427 |
| rs10498645 | 14 | 95332505  | G | 0.00100 |
| rs17093610 | 14 | 95516403  | G | 0.00651 |
| rs11628024 | 14 | 95518120  | A | 0.00341 |
| rs2369415  | 14 | 95526439  | G | 0.01591 |
| rs10149056 | 14 | 95560098  | C | 0.00425 |
| rs4905449  | 14 | 95686083  | A | 0.00308 |
| rs2069600  | 14 | 95782782  | T | 0.00944 |
| rs1890913  | 14 | 95953722  | A | 0.00307 |
| rs11847642 | 14 | 96222951  | T | 0.00642 |
| rs17094378 | 14 | 96260492  | T | 0.00831 |
| rs17094877 | 14 | 96564728  | G | 0.00810 |
| rs234184   | 14 | 97201697  | C | 0.00205 |
| rs7154456  | 14 | 97257396  | T | 0.00820 |
| rs1840790  | 14 | 97426285  | T | 0.01469 |
| rs17096516 | 14 | 97689215  | T | 0.01344 |
| rs17096556 | 14 | 97697068  | C | 0.01197 |
| rs17096732 | 14 | 97738977  | A | 0.01417 |
| rs4900391  | 14 | 97775389  | T | 0.00301 |
| rs11846788 | 14 | 97815629  | A | 0.01004 |
| rs8022910  | 14 | 97833989  | G | 0.01401 |
| rs7142106  | 14 | 97834528  | C | 0.01601 |
| rs8003296  | 14 | 98039917  | G | 0.00389 |
| rs17097056 | 14 | 98040463  | G | 0.01377 |
| rs8022320  | 14 | 98057225  | G | 0.00026 |
| rs7152687  | 14 | 98283632  | T | 0.01562 |
| rs10136851 | 14 | 98338138  | T | 0.00540 |
| rs1257669  | 14 | 98561945  | G | 0.01218 |
| rs8019310  | 14 | 98576180  | T | 0.00377 |
| rs10136896 | 14 | 98672685  | A | 0.00696 |
| rs7151749  | 14 | 99615311  | T | 0.00000 |
| rs2766696  | 14 | 99731073  | T | 0.00652 |
| rs7159412  | 14 | 100345436 | C | 0.00720 |
| rs7146650  | 14 | 100369680 | G | 0.00864 |
| rs11160631 | 14 | 100699224 | T | 0.01648 |
| rs7147563  | 14 | 101107380 | C | 0.01540 |
| rs1904298  | 14 | 101426228 | A | 0.00755 |
| rs911627   | 14 | 102481588 | C | 0.00736 |
| rs2403107  | 14 | 102482021 | A | 0.01178 |
| rs8019504  | 14 | 102862008 | A | 0.00987 |
| rs17101871 | 14 | 103376191 | C | 0.00244 |
| rs1770998  | 14 | 103610922 | A | 0.00893 |
| rs2816662  | 14 | 104667099 | G | 0.01530 |



|            |    |          |   |         |
|------------|----|----------|---|---------|
| rs8042584  | 15 | 21674230 | C | 0.00812 |
| rs1459963  | 15 | 21779413 | C | 0.01568 |
| rs996956   | 15 | 21780108 | G | 0.00708 |
| rs17829754 | 15 | 21982100 | T | 0.01554 |
| rs6576424  | 15 | 23248632 | C | 0.01645 |
| rs2925239  | 15 | 23332768 | G | 0.00620 |
| rs2925253  | 15 | 23427097 | A | 0.01290 |
| rs4906777  | 15 | 23600150 | G | 0.01003 |
| rs17642892 | 15 | 23604395 | A | 0.00055 |
| rs8041836  | 15 | 23605988 | G | 0.00008 |
| rs1849155  | 15 | 23708904 | T | 0.00438 |
| rs7171565  | 15 | 23768183 | G | 0.00653 |
| rs3915026  | 15 | 23847489 | A | 0.01316 |
| rs4261503  | 15 | 24091541 | C | 0.01001 |
| rs4567674  | 15 | 24462768 | A | 0.00602 |
| rs8032341  | 15 | 24625888 | G | 0.00349 |
| rs7402786  | 15 | 24632266 | A | 0.01322 |
| rs2116526  | 15 | 24815274 | A | 0.01411 |
| rs12439106 | 15 | 24875499 | A | 0.00235 |
| rs16950123 | 15 | 25431355 | C | 0.00678 |
| rs3097459  | 15 | 25510397 | A | 0.01229 |
| rs4778185  | 15 | 25738936 | T | 0.01463 |
| rs12592307 | 15 | 25763768 | T | 0.01137 |
| rs768547   | 15 | 25774538 | A | 0.00665 |
| rs9989302  | 15 | 26064496 | C | 0.00274 |
| rs12324794 | 15 | 27025631 | A | 0.01295 |
| rs1025989  | 15 | 27391874 | C | 0.00097 |
| rs1373891  | 15 | 27395970 | T | 0.00629 |
| rs16955485 | 15 | 27547808 | T | 0.01480 |
| rs10851966 | 15 | 27556480 | C | 0.00666 |
| rs11073050 | 15 | 27562437 | C | 0.00044 |
| rs16956564 | 15 | 29208621 | G | 0.00842 |
| rs783032   | 15 | 29251419 | C | 0.01301 |
| rs17228227 | 15 | 29324938 | C | 0.00669 |
| rs17815905 | 15 | 29332325 | T | 0.00652 |
| rs4354896  | 15 | 29494067 | C | 0.01006 |
| rs2125617  | 15 | 29548278 | C | 0.01505 |
| rs4779532  | 15 | 29559726 | G | 0.00529 |
| rs905434   | 15 | 29883581 | A | 0.01162 |
| rs905438   | 15 | 29884283 | C | 0.01360 |
| rs7171443  | 15 | 29891656 | A | 0.00317 |
| rs7182228  | 15 | 29893943 | C | 0.01545 |
| rs2879291  | 15 | 29912376 | G | 0.01425 |
| rs17604644 | 15 | 29918313 | G | 0.01075 |

|            |    |          |   |         |
|------------|----|----------|---|---------|
| rs1258735  | 15 | 30855275 | T | 0.00399 |
| rs1258736  | 15 | 30855315 | C | 0.01225 |
| rs347942   | 15 | 30964590 | A | 0.01290 |
| rs11852910 | 15 | 31306881 | A | 0.00522 |
| rs11633122 | 15 | 31375943 | A | 0.01292 |
| rs2572167  | 15 | 31569534 | C | 0.00871 |
| rs2572204  | 15 | 31583002 | T | 0.00562 |
| rs11638664 | 15 | 31706944 | T | 0.01232 |
| rs16957135 | 15 | 31724171 | T | 0.00134 |
| rs12101933 | 15 | 31732691 | C | 0.00793 |
| rs17817626 | 15 | 31893329 | C | 0.01038 |
| rs504714   | 15 | 32052393 | T | 0.00952 |
| rs1436914  | 15 | 32728335 | A | 0.01104 |
| rs11632450 | 15 | 32793952 | G | 0.00497 |
| rs2196562  | 15 | 32841217 | A | 0.01207 |
| rs1521849  | 15 | 32849069 | T | 0.01433 |
| rs11855784 | 15 | 32959677 | T | 0.01230 |
| rs16960581 | 15 | 33252088 | A | 0.01498 |
| rs167615   | 15 | 33310670 | G | 0.01014 |
| rs16960726 | 15 | 33337838 | T | 0.00189 |
| rs17586323 | 15 | 33550949 | T | 0.01439 |
| rs958384   | 15 | 33554579 | G | 0.01547 |
| rs16961136 | 15 | 33590674 | G | 0.00468 |
| rs8024137  | 15 | 33624589 | A | 0.00249 |
| rs2647668  | 15 | 33788678 | A | 0.00503 |
| rs2339987  | 15 | 34080142 | C | 0.01616 |
| rs4924065  | 15 | 34490368 | A | 0.01609 |
| rs7173993  | 15 | 34539883 | A | 0.00671 |
| rs4924116  | 15 | 35086443 | T | 0.01057 |
| rs1533673  | 15 | 35282522 | C | 0.00267 |
| rs1568449  | 15 | 35418881 | T | 0.00485 |
| rs7174609  | 15 | 35686045 | C | 0.00044 |
| rs10852007 | 15 | 35900682 | T | 0.00091 |
| rs4924266  | 15 | 36502454 | G | 0.00606 |
| rs12324139 | 15 | 36654501 | T | 0.01085 |
| rs12324161 | 15 | 36654582 | A | 0.01073 |
| rs4923807  | 15 | 36980534 | C | 0.01236 |
| rs4462564  | 15 | 37507072 | T | 0.00510 |
| rs2664128  | 15 | 37781025 | C | 0.00935 |
| rs4924393  | 15 | 37913935 | C | 0.00290 |
| rs8028660  | 15 | 38943412 | A | 0.00681 |
| rs7173954  | 15 | 39062306 | A | 0.00943 |
| rs7166182  | 15 | 39301991 | A | 0.01001 |
| rs16971832 | 15 | 39551211 | C | 0.00041 |

|            |    |          |   |         |
|------------|----|----------|---|---------|
| rs11858969 | 15 | 39607260 | A | 0.00587 |
| rs9944249  | 15 | 39634468 | A | 0.01017 |
| rs4923918  | 15 | 39948235 | T | 0.01479 |
| rs4924678  | 15 | 40548728 | A | 0.00679 |
| rs9920935  | 15 | 40862494 | C | 0.01250 |
| rs11635852 | 15 | 41717056 | G | 0.00831 |
| rs2277610  | 15 | 42650222 | T | 0.00537 |
| rs6493111  | 15 | 42803897 | A | 0.00071 |
| rs3100141  | 15 | 42843424 | G | 0.01576 |
| rs11637838 | 15 | 43337949 | A | 0.01176 |
| rs8039354  | 15 | 43339048 | G | 0.00434 |
| rs11631021 | 15 | 43344121 | A | 0.01489 |
| rs11639420 | 15 | 43346560 | A | 0.00126 |
| rs11636114 | 15 | 43388704 | G | 0.00011 |
| rs2453518  | 15 | 43516029 | G | 0.00882 |
| rs8026116  | 15 | 43775298 | G | 0.00347 |
| rs16949297 | 15 | 44023436 | G | 0.00369 |
| rs6493188  | 15 | 44030019 | T | 0.00989 |
| rs1601206  | 15 | 44513767 | T | 0.00917 |
| rs8042193  | 15 | 44965986 | A | 0.00347 |
| rs11070567 | 15 | 45204194 | T | 0.01402 |
| rs1390870  | 15 | 45541604 | T | 0.00276 |
| rs12908208 | 15 | 45584167 | T | 0.00260 |
| rs2136897  | 15 | 45708806 | G | 0.00503 |
| rs1025759  | 15 | 45855742 | C | 0.00735 |
| rs11070617 | 15 | 45932546 | A | 0.00866 |
| rs12898572 | 15 | 46648809 | C | 0.00975 |
| rs4381535  | 15 | 46999340 | G | 0.00569 |
| rs4303430  | 15 | 47007244 | A | 0.00758 |
| rs1911614  | 15 | 47650898 | T | 0.01132 |
| rs2414003  | 15 | 48105489 | A | 0.00502 |
| rs8029889  | 15 | 48338192 | G | 0.00042 |
| rs17431564 | 15 | 48497408 | T | 0.01522 |
| rs11070790 | 15 | 48626310 | A | 0.00432 |
| rs11632323 | 15 | 49215489 | T | 0.00424 |
| rs16964764 | 15 | 50284225 | A | 0.01548 |
| rs17614119 | 15 | 50500938 | A | 0.00595 |
| rs8034728  | 15 | 50652177 | A | 0.01283 |
| rs690013   | 15 | 51279653 | C | 0.01117 |
| rs1949098  | 15 | 51291057 | G | 0.00894 |
| rs17711751 | 15 | 51395895 | A | 0.00373 |
| rs11632462 | 15 | 51481077 | A | 0.01238 |
| rs11853116 | 15 | 51492626 | A | 0.00424 |
| rs640063   | 15 | 51518440 | T | 0.00209 |

|            |    |          |   |         |
|------------|----|----------|---|---------|
| rs10220852 | 15 | 51627071 | C | 0.00284 |
| rs16966302 | 15 | 51690626 | T | 0.00615 |
| rs533362   | 15 | 51901639 | A | 0.00612 |
| rs2725627  | 15 | 51979784 | C | 0.01093 |
| rs2616910  | 15 | 52063875 | T | 0.00200 |
| rs8023723  | 15 | 52310314 | C | 0.01029 |
| rs12439702 | 15 | 52320735 | G | 0.01234 |
| rs12917023 | 15 | 52327637 | G | 0.00298 |
| rs495769   | 15 | 52589815 | T | 0.00347 |
| rs16974720 | 15 | 52597824 | C | 0.00212 |
| rs6493735  | 15 | 53049743 | G | 0.01618 |
| rs1690358  | 15 | 53090579 | G | 0.01081 |
| rs8037056  | 15 | 53424801 | C | 0.01630 |
| rs7179377  | 15 | 53844316 | T | 0.00969 |
| rs12900986 | 15 | 55046028 | C | 0.00242 |
| rs967514   | 15 | 55201068 | G | 0.00417 |
| rs745998   | 15 | 55660593 | A | 0.00382 |
| rs2899611  | 15 | 56114639 | A | 0.01470 |
| rs12899929 | 15 | 56230722 | G | 0.00268 |
| rs12916831 | 15 | 57261382 | A | 0.00238 |
| rs9920861  | 15 | 58460982 | C | 0.00942 |
| rs9920823  | 15 | 58461141 | T | 9.12400 |
| rs11071551 | 15 | 58805789 | G | 0.01612 |
| rs16943012 | 15 | 58806100 | C | 0.01660 |
| rs4774376  | 15 | 58975973 | G | 0.00982 |
| rs2899664  | 15 | 58988042 | A | 0.00291 |
| rs4378570  | 15 | 58994347 | T | 0.00655 |
| rs8028646  | 15 | 58998481 | A | 0.01408 |
| rs11638929 | 15 | 59080991 | T | 0.00519 |
| rs4775384  | 15 | 59403632 | A | 0.01586 |
| rs11630398 | 15 | 59480010 | G | 0.01270 |
| rs4619338  | 15 | 59553394 | G | 0.01427 |
| rs12902473 | 15 | 60226723 | A | 0.01416 |
| rs1518173  | 15 | 60483171 | T | 0.01454 |
| rs12911081 | 15 | 60503933 | G | 0.00328 |
| rs16945148 | 15 | 60574452 | C | 0.00527 |
| rs16945167 | 15 | 60578048 | T | 0.00019 |
| rs885188   | 15 | 60581199 | G | 0.00307 |
| rs16945344 | 15 | 60671425 | C | 0.00939 |
| rs1050255  | 15 | 61150684 | G | 0.01354 |
| rs1499605  | 15 | 61493278 | A | 0.00838 |
| rs12917403 | 15 | 61544333 | T | 0.00909 |
| rs8025240  | 15 | 61615616 | T | 0.00881 |
| rs4074448  | 15 | 61675548 | C | 0.01631 |

|            |    |          |   |          |
|------------|----|----------|---|----------|
| rs477966   | 15 | 62570778 | G | 0.00279  |
| rs6494518  | 15 | 63453712 | C | 0.00422  |
| rs12595096 | 15 | 64898350 | C | 0.00608  |
| rs17274866 | 15 | 65015413 | A | 0.01535  |
| rs12441344 | 15 | 65234949 | G | 0.00683  |
| rs12595334 | 15 | 65272210 | T | 0.00672  |
| rs8042007  | 15 | 65440030 | C | 0.00687  |
| rs4776991  | 15 | 65927216 | T | 0.00279  |
| rs2280218  | 15 | 66354066 | G | 0.00212  |
| rs3784334  | 15 | 66397438 | C | 8.81400  |
| rs7179598  | 15 | 66409618 | A | 0.00325  |
| rs11072031 | 15 | 66545560 | C | 0.00720  |
| rs7169200  | 15 | 66736955 | C | 0.01440  |
| rs12438916 | 15 | 67263598 | T | 0.01493  |
| rs4777125  | 15 | 67288438 | G | 0.00505  |
| rs4777180  | 15 | 67773628 | G | 0.01546  |
| rs10220831 | 15 | 67779168 | G | 0.00940  |
| rs453151   | 15 | 67884729 | G | 18.21900 |
| rs7169441  | 15 | 68049834 | A | 0.00847  |
| rs869607   | 15 | 68104426 | T | 0.00772  |
| rs11630941 | 15 | 68329262 | C | 0.00121  |
| rs16955491 | 15 | 69437166 | G | 0.00919  |
| rs7167951  | 15 | 69466017 | A | 4.39400  |
| rs991051   | 15 | 69537817 | C | 0.00036  |
| rs12912393 | 15 | 69540196 | C | 0.00425  |
| rs3924603  | 15 | 69564029 | A | 0.01480  |
| rs8037079  | 15 | 69630924 | T | 0.00360  |
| rs13379966 | 15 | 69689588 | C | 0.01477  |
| rs7169459  | 15 | 69746050 | T | 0.00350  |
| rs1604335  | 15 | 69791262 | T | 0.01279  |
| rs17737569 | 15 | 69804834 | C | 0.00715  |
| rs12909288 | 15 | 69835470 | G | 0.00427  |
| rs16956602 | 15 | 70235165 | T | 0.00865  |
| rs3803388  | 15 | 70332911 | T | 0.00197  |
| rs16956956 | 15 | 70530512 | C | 0.00277  |
| rs2278543  | 15 | 70864255 | G | 0.00476  |
| rs4514651  | 15 | 70909026 | T | 0.00306  |
| rs1038094  | 15 | 71799490 | A | 0.01568  |
| rs893818   | 15 | 72016248 | T | 0.00429  |
| rs971756   | 15 | 72275022 | A | 0.00826  |
| rs351214   | 15 | 72363319 | A | 0.00207  |
| rs7176022  | 15 | 72894933 | G | 0.01307  |
| rs11072528 | 15 | 73223508 | G | 0.00924  |
| rs8026113  | 15 | 73723753 | G | 0.00947  |

|            |    |          |   |         |
|------------|----|----------|---|---------|
| rs11634290 | 15 | 73771150 | T | 0.00716 |
| rs12903227 | 15 | 75110084 | A | 0.00984 |
| rs17467967 | 15 | 75281409 | A | 0.01012 |
| rs3803380  | 15 | 76157798 | G | 0.01354 |
| rs16969482 | 15 | 76164665 | T | 0.01540 |
| rs869858   | 15 | 76280099 | T | 0.00251 |
| rs16970187 | 15 | 76964515 | G | 0.00554 |
| rs7171473  | 15 | 77270126 | A | 0.00277 |
| rs1110729  | 15 | 77790012 | A | 0.00240 |
| rs16971368 | 15 | 77891230 | A | 0.00214 |
| rs16971739 | 15 | 78182928 | T | 0.01458 |
| rs7172425  | 15 | 78689321 | G | 0.00897 |
| rs11633017 | 15 | 78880032 | G | 0.01460 |
| rs748696   | 15 | 78880943 | C | 0.01580 |
| rs1507661  | 15 | 78996352 | T | 0.01614 |
| rs7162859  | 15 | 79147093 | T | 0.01290 |
| rs8031649  | 15 | 79889541 | C | 0.00145 |
| rs12916134 | 15 | 79981140 | G | 0.01247 |
| rs16973216 | 15 | 80004173 | C | 0.01279 |
| rs17350827 | 15 | 80037058 | C | 0.01483 |
| rs12324805 | 15 | 80139255 | C | 0.01210 |
| rs896368   | 15 | 83294136 | T | 0.00849 |
| rs896370   | 15 | 83294367 | G | 0.01537 |
| rs8039875  | 15 | 83499650 | T | 0.00146 |
| rs6496932  | 15 | 83626571 | T | 0.00843 |
| rs7168345  | 15 | 83814605 | A | 0.00388 |
| rs12913754 | 15 | 83824542 | G | 0.00128 |
| rs11637726 | 15 | 83860275 | C | 0.00649 |
| rs4842888  | 15 | 83864137 | C | 0.00089 |
| rs3743321  | 15 | 83865972 | G | 0.00976 |
| rs6496055  | 15 | 83871692 | G | 0.00274 |
| rs17574774 | 15 | 84034374 | C | 0.00742 |
| rs4842907  | 15 | 84239094 | A | 0.00989 |
| rs4262906  | 15 | 84263856 | A | 0.00471 |
| rs17650190 | 15 | 84363182 | T | 0.00716 |
| rs4887511  | 15 | 84393542 | G | 0.00244 |
| rs11630546 | 15 | 84415671 | T | 0.01394 |
| rs1835629  | 15 | 84756735 | C | 0.00405 |
| rs7174126  | 15 | 84815653 | G | 0.00213 |
| rs9920671  | 15 | 84815973 | C | 0.01649 |
| rs12591257 | 15 | 84865093 | C | 0.00931 |
| rs896614   | 15 | 85108849 | T | 0.00829 |
| rs4887516  | 15 | 85233492 | G | 0.00704 |
| rs1473258  | 15 | 85397349 | G | 0.00275 |

|            |    |          |   |         |
|------------|----|----------|---|---------|
| rs17738824 | 15 | 85643188 | G | 0.00493 |
| rs17716031 | 15 | 85842923 | T | 0.01510 |
| rs11857638 | 15 | 86016574 | C | 0.01588 |
| rs1560977  | 15 | 86204840 | C | 0.00563 |
| rs3803409  | 15 | 86205395 | C | 0.00175 |
| rs7170215  | 15 | 86299145 | A | 0.00289 |
| rs10520673 | 15 | 86418725 | A | 0.01634 |
| rs16941252 | 15 | 86439010 | G | 0.00784 |
| rs7169335  | 15 | 86561320 | C | 0.01583 |
| rs17188013 | 15 | 86805495 | G | 0.01618 |
| rs16941976 | 15 | 86829106 | G | 0.00267 |
| rs7163448  | 15 | 86836540 | G | 0.01327 |
| rs7182912  | 15 | 86839816 | A | 0.00665 |
| rs11637762 | 15 | 86947538 | C | 0.01171 |
| rs11073865 | 15 | 87790545 | A | 0.01117 |
| rs11073866 | 15 | 87790819 | C | 0.00783 |
| rs4932227  | 15 | 87865597 | C | 0.00682 |
| rs8039002  | 15 | 87943291 | G | 0.00475 |
| rs894157   | 15 | 87969112 | A | 0.01650 |
| rs753362   | 15 | 88141538 | G | 0.00161 |
| rs11635236 | 15 | 88651766 | A | 0.01261 |
| rs8026218  | 15 | 88946269 | C | 0.01274 |
| rs4932182  | 15 | 89309807 | A | 0.00451 |
| rs16945332 | 15 | 89543178 | G | 0.01441 |
| rs8026662  | 15 | 89584811 | T | 0.01432 |
| rs8028098  | 15 | 89918244 | G | 0.01039 |
| rs12148290 | 15 | 89962969 | G | 0.01381 |
| rs6496866  | 15 | 90247268 | T | 0.00146 |
| rs7175217  | 15 | 90478521 | T | 0.00523 |
| rs12440538 | 15 | 90571510 | C | 0.00269 |
| rs11632145 | 15 | 90573772 | A | 0.00933 |
| rs16946658 | 15 | 90616516 | A | 0.00264 |
| rs16947479 | 15 | 91476326 | T | 0.00604 |
| rs12911343 | 15 | 91592091 | T | 0.00139 |
| rs7180119  | 15 | 91994204 | C | 0.01402 |
| rs8041276  | 15 | 92422259 | C | 0.01180 |
| rs16949124 | 15 | 92776053 | A | 0.00120 |
| rs1863095  | 15 | 92917093 | A | 0.00596 |
| rs12442336 | 15 | 93134763 | A | 0.00359 |
| rs17637117 | 15 | 93705068 | T | 0.01474 |
| rs9672727  | 15 | 93770078 | A | 0.01494 |
| rs4581667  | 15 | 93938912 | G | 0.01262 |
| rs11856995 | 15 | 94126647 | C | 0.01324 |
| rs16975873 | 15 | 94311063 | A | 0.00488 |

|            |    |           |   |         |
|------------|----|-----------|---|---------|
| rs1450484  | 15 | 94386371  | T | 0.01148 |
| rs11629694 | 15 | 94409141  | T | 0.01288 |
| rs1964412  | 15 | 94583487  | A | 0.01325 |
| rs11856264 | 15 | 94589026  | T | 0.01649 |
| rs2398162  | 15 | 94631554  | C | 0.00432 |
| rs10162920 | 15 | 94772921  | A | 0.01363 |
| rs12438146 | 15 | 94832146  | G | 0.01034 |
| rs8037286  | 15 | 94837156  | G | 0.00697 |
| rs12910181 | 15 | 94970584  | C | 0.00646 |
| rs964672   | 15 | 96323042  | T | 0.00553 |
| rs899672   | 15 | 96445206  | C | 0.00880 |
| rs10152110 | 15 | 96491372  | T | 0.00480 |
| rs11634680 | 15 | 96494081  | A | 0.00024 |
| rs3863402  | 15 | 96638256  | C | 0.01132 |
| rs4965332  | 15 | 96650361  | T | 0.01539 |
| rs12910957 | 15 | 96743014  | A | 0.00918 |
| rs2654974  | 15 | 97365957  | G | 0.00410 |
| rs11855362 | 15 | 97764026  | C | 0.00028 |
| rs4424892  | 15 | 97921908  | G | 0.00264 |
| rs325406   | 15 | 98065263  | G | 0.01073 |
| rs7165478  | 15 | 98095507  | T | 0.01454 |
| rs4965327  | 15 | 99016197  | C | 0.00211 |
| rs4965381  | 15 | 99749985  | A | 0.00869 |
| rs4965897  | 15 | 99903123  | T | 0.01034 |
| rs516667   | 15 | 100021554 | C | 0.00530 |
| rs11637017 | 15 | 100210760 | C | 0.01296 |
| rs6600227  | 16 | 55072     | C | 0.00333 |
| rs11248914 | 16 | 233563    | G | 0.00210 |
| rs1465761  | 16 | 932301    | T | 0.01382 |
| rs12595929 | 16 | 947764    | T | 0.01068 |
| rs7187167  | 16 | 1289210   | C | 0.00927 |
| rs1742431  | 16 | 1845875   | T | 0.00668 |
| rs4785913  | 16 | 2860765   | T | 0.01403 |
| rs2717695  | 16 | 3090897   | G | 0.01184 |
| rs8058624  | 16 | 4162240   | T | 0.00149 |
| rs3848370  | 16 | 4300315   | C | 0.00073 |
| rs11646063 | 16 | 4379210   | G | 0.00018 |
| rs4786509  | 16 | 4508770   | G | 0.00430 |
| rs11076837 | 16 | 4509441   | C | 0.00907 |
| rs9939503  | 16 | 4636655   | G | 0.01302 |
| rs3760030  | 16 | 5059873   | A | 0.00148 |
| rs11076893 | 16 | 5195875   | G | 0.00758 |
| rs938756   | 16 | 5343815   | T | 0.00125 |
| rs4786690  | 16 | 5469808   | A | 0.00415 |



|            |    |         |   |          |
|------------|----|---------|---|----------|
| rs7205245  | 16 | 5670141 | G | 0.01534  |
| rs10500328 | 16 | 5747879 | A | 0.01649  |
| rs9926798  | 16 | 5775884 | C | 0.00245  |
| rs8059231  | 16 | 5790794 | A | 0.00416  |
| rs9302816  | 16 | 6086024 | C | 0.00589  |
| rs7195534  | 16 | 6294920 | T | 0.00683  |
| rs12149730 | 16 | 6302495 | T | 0.00946  |
| rs1833157  | 16 | 6328800 | G | 0.00319  |
| rs1640881  | 16 | 6331875 | A | 0.00401  |
| rs11642627 | 16 | 6340689 | A | 0.00726  |
| rs17527108 | 16 | 6348155 | T | 0.00541  |
| rs809693   | 16 | 6429160 | G | 0.00928  |
| rs9923390  | 16 | 6594901 | G | 0.00065  |
| rs6500824  | 16 | 6760961 | T | 0.00853  |
| rs7200754  | 16 | 6837637 | A | 0.00133  |
| rs8054227  | 16 | 7052858 | C | 0.01561  |
| rs17670098 | 16 | 7149248 | A | 0.00608  |
| rs9929583  | 16 | 7180745 | G | 0.00681  |
| rs7201982  | 16 | 7183757 | T | 0.01000  |
| rs17143076 | 16 | 7247253 | A | 0.00194  |
| rs7195044  | 16 | 7277941 | C | 0.01302  |
| rs17143492 | 16 | 7356171 | A | 0.00393  |
| rs7202208  | 16 | 7375166 | C | 0.00781  |
| rs6500963  | 16 | 7407490 | C | 0.00382  |
| rs7186099  | 16 | 7501334 | G | 0.01365  |
| rs12596133 | 16 | 7531196 | C | 0.00701  |
| rs1507027  | 16 | 7531546 | C | 0.01592  |
| rs6500981  | 16 | 7533576 | A | 0.00809  |
| rs7197594  | 16 | 7559278 | A | 0.01020  |
| rs11641648 | 16 | 7562377 | C | 0.01325  |
| rs7190440  | 16 | 7565512 | C | 0.01628  |
| rs11648790 | 16 | 7567099 | G | 17.75400 |
| rs7196984  | 16 | 7737129 | C | 0.00228  |
| rs17145374 | 16 | 8178962 | C | 0.00074  |
| rs2360853  | 16 | 8284785 | G | 0.00491  |
| rs17145695 | 16 | 8296327 | T | 0.01352  |
| rs8044475  | 16 | 8351688 | G | 0.00700  |
| rs4074769  | 16 | 8538548 | G | 0.01594  |
| rs9925238  | 16 | 8544856 | G | 2.36400  |
| rs1731062  | 16 | 8710253 | A | 0.00896  |
| rs1075853  | 16 | 8782280 | G | 0.00315  |
| rs1347580  | 16 | 8907049 | T | 0.00338  |
| rs12446999 | 16 | 8957832 | C | 0.00024  |
| rs1114620  | 16 | 9171238 | G | 0.00800  |

|            |    |          |   |         |
|------------|----|----------|---|---------|
| rs2965859  | 16 | 9209582  | T | 0.00009 |
| rs1428795  | 16 | 9444348  | C | 0.00256 |
| rs8054870  | 16 | 9534859  | G | 0.01499 |
| rs7189658  | 16 | 9538224  | G | 0.00849 |
| rs12597733 | 16 | 9548886  | T | 0.00282 |
| rs9932623  | 16 | 9552891  | C | 0.00814 |
| rs9932870  | 16 | 9553178  | C | 0.00964 |
| rs12917871 | 16 | 9714028  | G | 0.01266 |
| rs8062216  | 16 | 9715998  | C | 0.01593 |
| rs6497420  | 16 | 9716455  | T | 0.01519 |
| rs6497421  | 16 | 9716477  | G | 0.00851 |
| rs1833167  | 16 | 9729142  | T | 0.00928 |
| rs17749793 | 16 | 9740694  | T | 0.00810 |
| rs8045712  | 16 | 9758623  | G | 0.00337 |
| rs11866385 | 16 | 10016159 | C | 0.00583 |
| rs837696   | 16 | 10019403 | G | 0.01307 |
| rs11074547 | 16 | 10044390 | T | 0.00053 |
| rs6497732  | 16 | 10153982 | T | 0.01574 |
| rs1071504  | 16 | 10187517 | C | 0.00037 |
| rs13335305 | 16 | 10263717 | C | 0.01086 |
| rs11074939 | 16 | 10919210 | G | 0.00053 |
| rs12598008 | 16 | 10947194 | G | 0.01370 |
| rs8055544  | 16 | 10999062 | A | 0.01189 |
| rs7205925  | 16 | 11369979 | T | 0.00316 |
| rs9934326  | 16 | 11658331 | A | 0.00293 |
| rs3829527  | 16 | 12615904 | C | 0.00839 |
| rs1651006  | 16 | 12682064 | C | 0.01327 |
| rs2865628  | 16 | 12761989 | G | 0.00674 |
| rs377027   | 16 | 13217669 | G | 0.00465 |
| rs2903251  | 16 | 13252951 | A | 0.00625 |
| rs9989415  | 16 | 13428953 | A | 0.00147 |
| rs7199289  | 16 | 13432639 | T | 0.01380 |
| rs16962155 | 16 | 13495836 | T | 0.00434 |
| rs16962265 | 16 | 13545495 | G | 0.00519 |
| rs12149863 | 16 | 13642296 | T | 0.00462 |
| rs11642741 | 16 | 13796291 | T | 0.01007 |
| rs7197456  | 16 | 13845373 | C | 0.00337 |
| rs4781565  | 16 | 14047838 | C | 0.00364 |
| rs6498514  | 16 | 14395803 | G | 0.01202 |
| rs2133774  | 16 | 15940440 | G | 0.00440 |
| rs7193763  | 16 | 17133036 | C | 0.00867 |
| rs4426337  | 16 | 17625019 | C | 0.01279 |
| rs8052722  | 16 | 17698192 | G | 0.01558 |
| rs4780657  | 16 | 18065113 | T | 0.00238 |

|            |    |          |   |         |
|------------|----|----------|---|---------|
| rs7197580  | 16 | 19186126 | A | 0.00322 |
| rs8052275  | 16 | 19237604 | A | 0.00055 |
| rs8051268  | 16 | 19237689 | C | 0.01638 |
| rs2027818  | 16 | 19239195 | G | 0.01377 |
| rs2027819  | 16 | 19239238 | A | 0.00517 |
| rs9921076  | 16 | 19379201 | A | 0.01426 |
| rs8063463  | 16 | 19403812 | C | 0.00674 |
| rs2079012  | 16 | 19486846 | C | 0.01114 |
| rs1031634  | 16 | 19948634 | C | 0.00375 |
| rs3103821  | 16 | 20863061 | G | 0.01266 |
| rs2172436  | 16 | 20931534 | T | 0.01648 |
| rs741719   | 16 | 21077070 | C | 0.00360 |
| rs41468646 | 16 | 21529747 | C | 0.00569 |
| rs4783414  | 16 | 21644915 | G | 0.01474 |
| rs6497580  | 16 | 22139927 | G | 0.00821 |
| rs4468604  | 16 | 22284504 | A | 0.00639 |
| rs41433148 | 16 | 22780221 | A | 0.01377 |
| rs2239335  | 16 | 22805296 | A | 0.01295 |
| rs17728207 | 16 | 22943549 | A | 0.01427 |
| rs9939129  | 16 | 23177793 | A | 0.01583 |
| rs16939978 | 16 | 23179497 | T | 0.00099 |
| rs1016586  | 16 | 23496467 | T | 0.00671 |
| rs17807642 | 16 | 23633222 | C | 0.00544 |
| rs192188   | 16 | 23647489 | T | 0.01292 |
| rs194788   | 16 | 23697839 | T | 0.01137 |
| rs274079   | 16 | 24809456 | T | 0.00313 |
| rs891842   | 16 | 24929812 | T | 0.01169 |
| rs1546586  | 16 | 25608447 | C | 0.01450 |
| rs4787750  | 16 | 25653401 | A | 0.00729 |
| rs7203781  | 16 | 25666529 | T | 0.00192 |
| rs4787772  | 16 | 25762669 | G | 0.00471 |
| rs4430747  | 16 | 25903277 | G | 0.01217 |
| rs11074748 | 16 | 26006106 | A | 0.01273 |
| rs4520841  | 16 | 26007616 | A | 0.00978 |
| rs17582688 | 16 | 26360431 | C | 0.01620 |
| rs321452   | 16 | 26617041 | A | 0.00148 |
| rs9925072  | 16 | 26790558 | G | 0.00645 |
| rs4638587  | 16 | 26870497 | G | 0.01057 |
| rs9674123  | 16 | 26915707 | T | 0.01600 |
| rs11646543 | 16 | 26918208 | T | 0.01522 |
| rs16976487 | 16 | 26919173 | T | 0.01337 |
| rs7184516  | 16 | 26980349 | T | 0.00847 |
| rs12926642 | 16 | 26982794 | A | 0.01660 |
| rs12927904 | 16 | 26982895 | G | 0.01523 |

|            |    |          |   |         |
|------------|----|----------|---|---------|
| rs17638800 | 16 | 27089322 | A | 0.01643 |
| rs8045153  | 16 | 27089979 | G | 0.01537 |
| rs4787413  | 16 | 27110532 | A | 0.00288 |
| rs252299   | 16 | 29140178 | G | 0.00005 |
| rs8055861  | 16 | 31307402 | G | 0.01428 |
| rs11150645 | 16 | 31786220 | G | 0.00713 |
| rs2623779  | 16 | 34240588 | A | 0.01375 |
| rs8054993  | 16 | 34679872 | A | 0.00809 |
| rs3809677  | 16 | 46052001 | T | 0.00196 |
| rs16945613 | 16 | 46391563 | A | 0.00742 |
| rs1510980  | 16 | 47739697 | A | 0.01442 |
| rs193915   | 16 | 48077446 | C | 0.00270 |
| rs193910   | 16 | 48078375 | G | 0.00202 |
| rs1420679  | 16 | 48166704 | T | 0.01265 |
| rs7204390  | 16 | 48178188 | G | 0.01617 |
| rs1420683  | 16 | 48178489 | G | 0.00259 |
| rs11076503 | 16 | 48431834 | T | 0.01354 |
| rs8057842  | 16 | 48781884 | T | 0.00352 |
| rs4490002  | 16 | 48817077 | G | 0.00750 |
| rs7202124  | 16 | 49271530 | G | 0.00352 |
| rs1981760  | 16 | 49280575 | C | 0.01056 |
| rs9933594  | 16 | 49281588 | G | 0.00618 |
| rs4785448  | 16 | 49282290 | G | 0.01638 |
| rs1861759  | 16 | 49303084 | A | 0.00323 |
| rs751271   | 16 | 49308676 | A | 0.00039 |
| rs16948985 | 16 | 49468532 | T | 0.00006 |
| rs11646341 | 16 | 49695756 | T | 0.01256 |
| rs2647979  | 16 | 50180936 | G | 0.01007 |
| rs2615010  | 16 | 50272978 | C | 0.00863 |
| rs11645575 | 16 | 50491356 | C | 0.00594 |
| rs17185495 | 16 | 50527886 | C | 0.01396 |
| rs1119603  | 16 | 50555041 | G | 0.00535 |
| rs17535828 | 16 | 50993710 | C | 0.01486 |
| rs4783780  | 16 | 51128937 | G | 0.00900 |
| rs4784227  | 16 | 51156689 | T | 0.01045 |
| rs3112572  | 16 | 51157948 | G | 0.01194 |
| rs3112609  | 16 | 51206232 | C | 0.00737 |
| rs4627343  | 16 | 51264185 | G | 0.01477 |
| rs7499206  | 16 | 51603635 | A | 0.01385 |
| rs8049586  | 16 | 51616359 | T | 0.00883 |
| rs1073454  | 16 | 51753543 | T | 0.01278 |
| rs3803658  | 16 | 51906084 | C | 0.01489 |
| rs9940700  | 16 | 52352910 | G | 0.00508 |
| rs12445828 | 16 | 52692303 | T | 0.00652 |

|            |    |          |   |         |
|------------|----|----------|---|---------|
| rs4530133  | 16 | 52753690 | T | 0.00422 |
| rs1562797  | 16 | 52900570 | T | 0.01086 |
| rs9972796  | 16 | 53021837 | T | 0.00182 |
| rs1420284  | 16 | 53030284 | A | 0.00466 |
| rs8059628  | 16 | 53135829 | G | 0.01057 |
| rs16953751 | 16 | 53185161 | A | 0.01372 |
| rs12932067 | 16 | 53733607 | G | 0.00640 |
| rs7197650  | 16 | 53866889 | C | 0.01009 |
| rs12932846 | 16 | 53872091 | C | 0.00973 |
| rs6499756  | 16 | 53909023 | G | 0.00746 |
| rs2192855  | 16 | 54126146 | G | 0.00521 |
| rs4238780  | 16 | 54130822 | C | 0.00278 |
| rs7184467  | 16 | 54233021 | G | 0.00489 |
| rs36006    | 16 | 54297556 | G | 0.00309 |
| rs4309387  | 16 | 54441384 | C | 0.01536 |
| rs8051382  | 16 | 54648394 | G | 0.00019 |
| rs2008084  | 16 | 54690175 | T | 0.00715 |
| rs10521336 | 16 | 54813457 | A | 0.01184 |
| rs11644504 | 16 | 54819250 | C | 0.01654 |
| rs1382362  | 16 | 54831387 | A | 0.01652 |
| rs2289114  | 16 | 55496023 | A | 0.00370 |
| rs11640308 | 16 | 55497470 | C | 0.00107 |
| rs37027    | 16 | 55507529 | C | 0.00232 |
| rs11076193 | 16 | 56097198 | T | 0.01191 |
| rs2731757  | 16 | 56783625 | G | 0.01246 |
| rs2731740  | 16 | 56791457 | A | 0.00077 |
| rs7197148  | 16 | 56962005 | A | 0.00236 |
| rs17821543 | 16 | 57098376 | T | 0.00066 |
| rs41445346 | 16 | 57149779 | G | 0.00648 |
| rs1871301  | 16 | 57552966 | C | 0.00589 |
| rs8062999  | 16 | 57565618 | A | 0.01455 |
| rs13334953 | 16 | 58096610 | T | 0.01368 |
| rs7191772  | 16 | 58124917 | T | 0.01174 |
| rs11863562 | 16 | 58129174 | A | 0.00511 |
| rs1500283  | 16 | 58338513 | G | 0.01214 |
| rs11076365 | 16 | 58767745 | T | 0.00407 |
| rs10431914 | 16 | 58791285 | A | 0.00804 |
| rs16962092 | 16 | 59068132 | C | 0.01132 |
| rs4785141  | 16 | 59537312 | C | 0.01115 |
| rs7195151  | 16 | 59639872 | C | 0.00474 |
| rs4784117  | 16 | 60012830 | G | 0.01289 |
| rs2407919  | 16 | 60162149 | A | 0.00396 |
| rs8058822  | 16 | 60187711 | T | 0.00406 |
| rs7189354  | 16 | 60463745 | C | 0.00858 |

|            |    |          |   |         |
|------------|----|----------|---|---------|
| rs2938719  | 16 | 61131967 | C | 0.00389 |
| rs3011235  | 16 | 61137678 | A | 0.00388 |
| rs2962442  | 16 | 61333268 | T | 0.00753 |
| rs153349   | 16 | 61620101 | T | 0.00222 |
| rs258159   | 16 | 62371274 | A | 0.01035 |
| rs11648590 | 16 | 63017123 | T | 0.00408 |
| rs41362348 | 16 | 63189754 | T | 0.01458 |
| rs1424000  | 16 | 63378852 | C | 0.00012 |
| rs2874148  | 16 | 63380457 | C | 0.00482 |
| rs35164    | 16 | 63532702 | A | 0.00865 |
| rs35162    | 16 | 63533057 | A | 0.00947 |
| rs1402020  | 16 | 63547688 | T | 0.00418 |
| rs9939590  | 16 | 63947553 | G | 0.00689 |
| rs9929092  | 16 | 63963161 | T | 0.01151 |
| rs17439904 | 16 | 64020359 | T | 0.01648 |
| rs7187758  | 16 | 64129516 | A | 3.68600 |
| rs12599568 | 16 | 64272626 | C | 0.00236 |
| rs4785875  | 16 | 64486360 | T | 0.01174 |
| rs11075598 | 16 | 64486648 | G | 0.01176 |
| rs12598065 | 16 | 64701645 | T | 0.01560 |
| rs2549491  | 16 | 64811279 | G | 0.00690 |
| rs233537   | 16 | 64852265 | G | 0.00701 |
| rs11568311 | 16 | 65528758 | A | 0.01228 |
| rs17689437 | 16 | 67157852 | A | 0.00291 |
| rs12598642 | 16 | 68406273 | G | 0.01370 |
| rs16970513 | 16 | 69349418 | T | 5.47600 |
| rs4985364  | 16 | 69364175 | C | 0.01060 |
| rs8060947  | 16 | 69381134 | G | 0.00347 |
| rs9931380  | 16 | 69391450 | C | 0.01325 |
| rs8054021  | 16 | 69605803 | C | 0.01025 |
| rs6499386  | 16 | 69606892 | T | 0.00054 |
| rs8048210  | 16 | 70274906 | G | 0.00508 |
| rs2036338  | 16 | 70346331 | G | 0.01251 |
| rs17664900 | 16 | 70585112 | C | 0.01279 |
| rs11075966 | 16 | 71711500 | G | 0.00596 |
| rs11649596 | 16 | 71891836 | C | 0.00898 |
| rs825840   | 16 | 72082928 | C | 0.01443 |
| rs10500572 | 16 | 72116858 | A | 0.01403 |
| rs8056327  | 16 | 72259525 | G | 0.00097 |
| rs764255   | 16 | 72271184 | C | 0.00608 |
| rs9926019  | 16 | 72307496 | C | 0.00526 |
| rs417940   | 16 | 72340097 | C | 0.01265 |
| rs4887925  | 16 | 72341917 | C | 0.00873 |
| rs9932030  | 16 | 72646583 | G | 0.00357 |

|             |    |          |   |         |
|-------------|----|----------|---|---------|
| rs8051876   | 16 | 72656475 | C | 0.01025 |
| rs2240244   | 16 | 73314484 | C | 0.01205 |
| rs8060979   | 16 | 73364993 | A | 0.00625 |
| rs11645072  | 16 | 73479949 | C | 0.01526 |
| rs6564245   | 16 | 73866400 | G | 0.00991 |
| rs1018097   | 16 | 74555050 | C | 0.01402 |
| rs6564297   | 16 | 74566842 | C | 0.00098 |
| rs8055817   | 16 | 74579010 | G | 0.00622 |
| rs13337655  | 16 | 74691349 | A | 0.01057 |
| rs12149144  | 16 | 74717773 | C | 0.00041 |
| rs4888477   | 16 | 74720494 | A | 0.01518 |
| rs4888478   | 16 | 74720684 | A | 0.00099 |
| rs724246    | 16 | 74726944 | C | 0.00037 |
| rs10871321  | 16 | 74757947 | G | 0.01632 |
| rs16943958  | 16 | 74772660 | G | 0.01134 |
| rs41526748  | 16 | 74773650 | G | 0.01409 |
| rs12597760  | 16 | 74792527 | A | 0.00357 |
| rs3851752   | 16 | 74793211 | G | 0.01104 |
| rs11863642  | 16 | 74793563 | A | 0.00540 |
| rs111149879 | 16 | 74793613 | C | 0.01506 |
| rs41515248  | 16 | 74794055 | T | 0.01594 |
| rs4888483   | 16 | 74794135 | G | 0.01662 |
| rs4888484   | 16 | 74794288 | A | 0.01658 |
| rs4533311   | 16 | 75087638 | G | 0.01547 |
| rs1496961   | 16 | 75492651 | T | 0.01298 |
| rs1874531   | 16 | 75511507 | A | 0.01078 |
| rs889706    | 16 | 75875092 | T | 0.00605 |
| rs2562125   | 16 | 75907154 | C | 0.01150 |
| rs41339645  | 16 | 75978734 | G | 0.00560 |
| rs17771505  | 16 | 76080236 | G | 0.00985 |
| rs8045050   | 16 | 76179102 | T | 0.01369 |
| rs17623334  | 16 | 76207451 | G | 0.00859 |
| rs8062748   | 16 | 76270643 | C | 0.01558 |
| rs409818    | 16 | 76572964 | T | 0.00606 |
| rs11643308  | 16 | 76766570 | C | 0.00474 |
| rs4334310   | 16 | 76842313 | T | 0.00422 |
| rs4459554   | 16 | 76959950 | C | 0.00934 |
| rs2738708   | 16 | 77080865 | G | 0.00621 |
| rs2738577   | 16 | 77218875 | T | 0.00497 |
| rs1981881   | 16 | 77223653 | G | 0.00078 |
| rs2550626   | 16 | 77236228 | C | 0.00179 |
| rs4887981   | 16 | 77359617 | T | 0.00869 |
| rs6564613   | 16 | 77459270 | G | 0.01437 |
| rs1995549   | 16 | 77541637 | C | 0.00687 |

|            |    |          |   |         |
|------------|----|----------|---|---------|
| rs1566884  | 16 | 77569485 | A | 0.00277 |
| rs16949152 | 16 | 77576754 | C | 0.00210 |
| rs17727687 | 16 | 77681077 | A | 0.01644 |
| rs11859942 | 16 | 77737760 | C | 0.00450 |
| rs17724508 | 16 | 77907705 | G | 0.01558 |
| rs16950218 | 16 | 77909775 | G | 0.01446 |
| rs1862718  | 16 | 78075910 | G | 0.01493 |
| rs8063590  | 16 | 78085689 | C | 0.01184 |
| rs388127   | 16 | 78141116 | A | 0.00498 |
| rs1559340  | 16 | 78206161 | C | 0.00738 |
| rs7189280  | 16 | 78206245 | T | 0.00167 |
| rs12599059 | 16 | 78227792 | C | 0.01159 |
| rs11867049 | 16 | 78296126 | C | 0.00373 |
| rs9941279  | 16 | 78296335 | C | 0.00707 |
| rs12925930 | 16 | 78297854 | C | 0.01638 |
| rs10871375 | 16 | 78298732 | G | 0.00988 |
| rs16951312 | 16 | 78350762 | A | 0.00802 |
| rs7197544  | 16 | 78494702 | C | 0.00002 |
| rs7204603  | 16 | 78692609 | G | 0.00678 |
| rs16952612 | 16 | 78781611 | A | 0.01095 |
| rs4533296  | 16 | 79130745 | C | 0.01595 |
| rs1466183  | 16 | 79175194 | C | 0.01254 |
| rs1423855  | 16 | 79383307 | C | 0.00314 |
| rs16954075 | 16 | 79405063 | G | 0.00515 |
| rs10459871 | 16 | 79650568 | C | 0.00385 |
| rs7190477  | 16 | 80197103 | C | 0.00460 |
| rs12444183 | 16 | 80330710 | A | 0.01569 |
| rs6564919  | 16 | 80374081 | G | 0.00921 |
| rs7192802  | 16 | 80374523 | G | 0.01173 |
| rs4580153  | 16 | 80374740 | C | 0.00947 |
| rs17537869 | 16 | 80480314 | G | 0.01315 |
| rs2966245  | 16 | 80663800 | G | 0.01622 |
| rs1029637  | 16 | 80884590 | T | 0.00955 |
| rs2317841  | 16 | 80934373 | T | 0.00354 |
| rs6565016  | 16 | 81011673 | G | 0.00729 |
| rs4783020  | 16 | 81041299 | T | 0.00204 |
| rs16957875 | 16 | 81213161 | T | 0.00089 |
| rs8046812  | 16 | 81352714 | G | 0.00585 |
| rs12933790 | 16 | 81826720 | A | 0.00680 |
| rs2194341  | 16 | 81837945 | G | 0.00921 |
| rs8059870  | 16 | 81851744 | C | 0.00927 |
| rs17678609 | 16 | 81853239 | G | 0.00595 |
| rs1019567  | 16 | 81901216 | C | 0.00928 |
| rs16960354 | 16 | 81989999 | G | 0.01035 |



|            |    |          |   |         |
|------------|----|----------|---|---------|
| rs8056534  | 16 | 82096406 | G | 0.00268 |
| rs4782539  | 16 | 82097934 | G | 0.00711 |
| rs4782814  | 16 | 82127288 | C | 0.00953 |
| rs4510000  | 16 | 82142657 | C | 0.00777 |
| rs4550432  | 16 | 82178360 | G | 0.00027 |
| rs4782555  | 16 | 82340293 | A | 0.00385 |
| rs402411   | 16 | 82454775 | C | 0.00585 |
| rs12599670 | 16 | 82528610 | G | 0.00237 |
| rs10163267 | 16 | 82531419 | C | 0.01088 |
| rs9926939  | 16 | 82584041 | C | 0.00009 |
| rs6563991  | 16 | 82599817 | T | 0.00549 |
| rs4782578  | 16 | 82620921 | G | 0.00938 |
| rs39553    | 16 | 82811788 | T | 0.00099 |
| rs16963210 | 16 | 82861578 | C | 0.01134 |
| rs17812824 | 16 | 82922690 | T | 0.01426 |
| rs959238   | 16 | 82976515 | G | 0.00386 |
| rs744838   | 16 | 83332187 | G | 0.00313 |
| rs6564098  | 16 | 83631915 | C | 0.00817 |
| rs10863203 | 16 | 84551081 | T | 0.00109 |
| rs17833838 | 16 | 84834231 | G | 0.00666 |
| rs1728407  | 16 | 84979613 | C | 0.00530 |
| rs16941191 | 16 | 85001690 | C | 0.00554 |
| rs12597431 | 16 | 85030826 | C | 0.00555 |
| rs11117502 | 16 | 85050919 | C | 0.00410 |
| rs7199903  | 16 | 85066945 | G | 0.00821 |
| rs9929301  | 16 | 85079091 | C | 0.00611 |
| rs1862783  | 16 | 85188980 | C | 0.00189 |
| rs7194028  | 16 | 85230802 | A | 0.00216 |
| rs299966   | 16 | 85362200 | T | 0.00932 |
| rs8060776  | 16 | 85513857 | G | 0.00490 |
| rs8058772  | 16 | 85776927 | A | 0.00645 |
| rs4843567  | 16 | 85805323 | G | 0.00215 |
| rs11649456 | 16 | 85862730 | T | 0.01222 |
| rs12444562 | 16 | 86214995 | A | 0.00047 |
| rs3751679  | 16 | 87182252 | A | 0.00505 |
| rs16965110 | 16 | 87434281 | G | 0.01407 |
| rs154659   | 16 | 88194838 | C | 0.00492 |
| rs7224313  | 17 | 38761    | C | 0.01290 |
| rs10454094 | 17 | 111223   | A | 0.00423 |
| rs11655015 | 17 | 1018374  | T | 0.00768 |
| rs4968174  | 17 | 1026950  | G | 0.00960 |
| rs8065878  | 17 | 1898829  | A | 0.00470 |
| rs9913537  | 17 | 2611762  | A | 0.00570 |
| rs4790372  | 17 | 2701606  | T | 0.00859 |

|            |    |          |   |         |
|------------|----|----------|---|---------|
| rs6502692  | 17 | 2966475  | C | 0.01555 |
| rs7220491  | 17 | 2981856  | C | 0.01269 |
| rs3907384  | 17 | 3248547  | G | 0.01138 |
| rs227787   | 17 | 3271560  | A | 0.00142 |
| rs17633288 | 17 | 3430534  | G | 0.01295 |
| rs3744678  | 17 | 3582517  | C | 0.00851 |
| rs16942524 | 17 | 3827102  | T | 0.01617 |
| rs17176181 | 17 | 3954399  | T | 0.00979 |
| rs10521129 | 17 | 3955569  | T | 0.00200 |
| rs12952341 | 17 | 4332252  | C | 0.01577 |
| rs1038118  | 17 | 4422333  | C | 0.00548 |
| rs11078571 | 17 | 5396485  | A | 0.01603 |
| rs16955281 | 17 | 5805293  | A | 0.01087 |
| rs8079805  | 17 | 5876608  | A | 0.01369 |
| rs8075301  | 17 | 5979493  | A | 0.00257 |
| rs1077009  | 17 | 6120653  | T | 0.00569 |
| rs9903554  | 17 | 6206438  | A | 0.00123 |
| rs4796560  | 17 | 6656402  | G | 0.00202 |
| rs9630721  | 17 | 6791092  | T | 0.00644 |
| rs2292067  | 17 | 7192872  | G | 0.01603 |
| rs1565816  | 17 | 7708213  | T | 0.00889 |
| rs4791641  | 17 | 8101874  | C | 0.00767 |
| rs268459   | 17 | 8425408  | A | 0.01059 |
| rs7217233  | 17 | 8556959  | C | 0.00123 |
| rs9894980  | 17 | 8644901  | A | 0.00874 |
| rs4791771  | 17 | 8788773  | T | 0.01500 |
| rs7224864  | 17 | 8802384  | G | 0.01141 |
| rs898009   | 17 | 9308277  | C | 0.01272 |
| rs1110096  | 17 | 9560527  | A | 0.00292 |
| rs531437   | 17 | 9593224  | C | 0.00720 |
| rs6503253  | 17 | 9656125  | A | 0.00556 |
| rs17207885 | 17 | 9671489  | T | 0.00446 |
| rs9897224  | 17 | 9864656  | C | 0.01195 |
| rs2240577  | 17 | 10160091 | C | 0.00557 |
| rs8077443  | 17 | 10428512 | T | 0.00712 |
| rs8064939  | 17 | 11179760 | T | 0.01602 |
| rs10521184 | 17 | 11477189 | G | 0.01547 |
| rs237270   | 17 | 12278259 | T | 0.01162 |
| rs11870286 | 17 | 12325534 | C | 0.00761 |
| rs11654944 | 17 | 12336944 | C | 0.00637 |
| rs2013153  | 17 | 12549877 | A | 0.00318 |
| rs9905366  | 17 | 12942425 | A | 0.01012 |
| rs2215077  | 17 | 13026348 | C | 0.00470 |
| rs2322858  | 17 | 13085487 | C | 0.01608 |

|            |    |          |   |         |
|------------|----|----------|---|---------|
| rs11078144 | 17 | 13154495 | A | 0.00669 |
| rs4792400  | 17 | 13651680 | C | 0.00234 |
| rs1860124  | 17 | 13668116 | T | 0.00777 |
| rs1859904  | 17 | 14098414 | T | 0.00187 |
| rs16949994 | 17 | 14461941 | G | 0.01253 |
| rs11652573 | 17 | 14482865 | T | 0.01432 |
| rs11649745 | 17 | 14519718 | C | 0.01434 |
| rs11652535 | 17 | 14696035 | A | 0.00783 |
| rs11656166 | 17 | 14927578 | C | 0.00426 |
| rs7218204  | 17 | 15357533 | A | 0.00892 |
| rs4792677  | 17 | 15628872 | T | 0.00368 |
| rs4792795  | 17 | 16766741 | C | 0.00708 |
| rs9893203  | 17 | 17275612 | G | 0.00894 |
| rs16961834 | 17 | 17354690 | C | 0.00801 |
| rs4368210  | 17 | 17836815 | G | 0.00006 |
| rs8065874  | 17 | 18216572 | A | 0.01305 |
| rs10491097 | 17 | 19301803 | T | 0.01271 |
| rs4925026  | 17 | 19486692 | T | 0.01335 |
| rs12937179 | 17 | 19524677 | T | 0.00316 |
| rs4925041  | 17 | 19535432 | A | 0.00560 |
| rs7214841  | 17 | 19572507 | T | 0.01021 |
| rs887241   | 17 | 19586530 | G | 0.00769 |
| rs157402   | 17 | 19661181 | G | 0.01106 |
| rs11204422 | 17 | 19937021 | T | 0.00612 |
| rs7223476  | 17 | 20155944 | T | 0.00957 |
| rs16966494 | 17 | 22367498 | C | 0.01558 |
| rs1011230  | 17 | 22569015 | G | 0.00917 |
| rs17778144 | 17 | 22873930 | C | 0.01377 |
| rs7207044  | 17 | 23099651 | C | 0.00209 |
| rs241772   | 17 | 23631847 | T | 8.25500 |
| rs11080063 | 17 | 23813398 | A | 0.00404 |
| rs4581750  | 17 | 23815286 | A | 0.00304 |
| rs8080570  | 17 | 24437529 | A | 0.01221 |
| rs3816780  | 17 | 26185484 | T | 0.00264 |
| rs6505219  | 17 | 26289747 | C | 0.00836 |
| rs2953013  | 17 | 26520469 | A | 0.00175 |
| rs2074151  | 17 | 26881062 | G | 0.00701 |
| rs17249181 | 17 | 28706137 | C | 0.00237 |
| rs16968252 | 17 | 28716561 | A | 0.00201 |
| rs2347154  | 17 | 28727436 | G | 0.00473 |
| rs11656936 | 17 | 28798812 | C | 0.00925 |
| rs190718   | 17 | 29010390 | C | 0.00737 |
| rs4794969  | 17 | 29020132 | G | 0.00999 |
| rs317375   | 17 | 29238214 | A | 0.00972 |

|            |    |          |   |         |
|------------|----|----------|---|---------|
| rs6505386  | 17 | 29247841 | A | 0.00416 |
| rs4239243  | 17 | 29353806 | A | 0.00399 |
| rs4513143  | 17 | 29361439 | G | 0.01413 |
| rs2228989  | 17 | 29507383 | C | 0.01111 |
| rs1860190  | 17 | 29600686 | A | 0.00408 |
| rs16969603 | 17 | 29734011 | A | 0.00088 |
| rs11867951 | 17 | 29734719 | C | 0.01182 |
| rs159304   | 17 | 29735833 | A | 0.01190 |
| rs16969695 | 17 | 29741828 | T | 0.00745 |
| rs212498   | 17 | 29755162 | G | 0.01444 |
| rs159244   | 17 | 29769746 | G | 0.01441 |
| rs756882   | 17 | 29772173 | G | 0.00969 |
| rs295066   | 17 | 29808100 | G | 0.00674 |
| rs4795972  | 17 | 30039109 | A | 0.00470 |
| rs4795980  | 17 | 30050692 | G | 0.01635 |
| rs2240667  | 17 | 30076771 | G | 0.01665 |
| rs4795043  | 17 | 30092666 | G | 0.00695 |
| rs11657617 | 17 | 30230919 | C | 0.01492 |
| rs6505447  | 17 | 30523981 | T | 0.00626 |
| rs772124   | 17 | 30655442 | G | 0.00208 |
| rs4239251  | 17 | 30820998 | A | 0.00591 |
| rs11655913 | 17 | 30821778 | A | 0.01103 |
| rs8066132  | 17 | 30830445 | G | 0.01467 |
| rs41324748 | 17 | 30849516 | C | 0.01600 |
| rs4239252  | 17 | 31187678 | G | 0.01273 |
| rs854684   | 17 | 31336328 | G | 0.00589 |
| rs3816279  | 17 | 32115831 | C | 0.00082 |
| rs9330251  | 17 | 32663451 | A | 0.01276 |
| rs2189303  | 17 | 33134218 | G | 0.01028 |
| rs2107131  | 17 | 33160802 | A | 0.00457 |
| rs2610383  | 17 | 33678831 | G | 0.00431 |
| rs3785744  | 17 | 34527291 | G | 0.01067 |
| rs903507   | 17 | 34979949 | A | 0.00470 |
| rs9972941  | 17 | 36121448 | C | 0.00986 |
| rs7502428  | 17 | 36133740 | T | 0.00067 |
| rs16968916 | 17 | 36439391 | G | 0.00364 |
| rs9900575  | 17 | 36561201 | T | 0.00965 |
| rs1001191  | 17 | 36712002 | T | 0.00887 |
| rs12449671 | 17 | 36725455 | T | 0.00636 |
| rs9911630  | 17 | 38441868 | A | 0.01533 |
| rs4793197  | 17 | 38485428 | C | 0.01141 |
| rs799916   | 17 | 38496716 | T | 0.01441 |
| rs8176126  | 17 | 38512575 | G | 0.01161 |
| rs4520874  | 17 | 38771048 | A | 0.00352 |

|            |    |          |   |         |
|------------|----|----------|---|---------|
| rs4793229  | 17 | 38773860 | T | 0.01006 |
| rs9646413  | 17 | 38781683 | A | 0.01237 |
| rs4792990  | 17 | 38817755 | T | 0.00262 |
| rs9748005  | 17 | 39002692 | T | 0.00661 |
| rs556197   | 17 | 39065034 | T | 0.00673 |
| rs7213436  | 17 | 39607689 | G | 0.00080 |
| rs4239144  | 17 | 40319989 | A | 0.00709 |
| rs4793172  | 17 | 40487006 | T | 0.00546 |
| rs41467648 | 17 | 40510905 | C | 0.00623 |
| rs1053733  | 17 | 40538554 | C | 0.00162 |
| rs2083798  | 17 | 42276896 | T | 0.00962 |
| rs2083797  | 17 | 42276928 | A | 0.00059 |
| rs4968279  | 17 | 42285344 | T | 0.01240 |
| rs16941306 | 17 | 42365551 | T | 0.01287 |
| rs2292700  | 17 | 42717422 | C | 0.00816 |
| rs17035    | 17 | 43255967 | T | 0.00198 |
| rs2021752  | 17 | 43595262 | A | 0.01592 |
| rs16953235 | 17 | 43599947 | G | 0.00203 |
| rs3792692  | 17 | 43610091 | T | 0.01601 |
| rs3897986  | 17 | 43616538 | A | 0.00868 |
| rs2305433  | 17 | 43620432 | C | 0.01200 |
| rs11652932 | 17 | 44052757 | T | 0.01023 |
| rs11079856 | 17 | 44545771 | C | 0.01075 |
| rs17636326 | 17 | 44572905 | T | 0.00265 |
| rs6504617  | 17 | 45040049 | G | 0.00831 |
| rs17712721 | 17 | 45097276 | G | 0.01433 |
| rs2586498  | 17 | 45631251 | A | 0.00091 |
| rs8075406  | 17 | 46104521 | A | 0.00514 |
| rs9912472  | 17 | 47083999 | T | 0.00517 |
| rs5022059  | 17 | 47097552 | C | 0.00306 |
| rs16951051 | 17 | 47584392 | G | 0.01113 |
| rs10514999 | 17 | 47655029 | C | 0.00440 |
| rs1503051  | 17 | 47659318 | C | 0.01332 |
| rs10515007 | 17 | 47750538 | A | 0.00463 |
| rs1386269  | 17 | 47762776 | G | 0.01627 |
| rs11080004 | 17 | 47802800 | C | 0.00804 |
| rs4794347  | 17 | 47862591 | T | 0.00021 |
| rs350011   | 17 | 47938582 | A | 0.00875 |
| rs350016   | 17 | 47941885 | T | 0.01338 |
| rs4794363  | 17 | 48034698 | T | 0.01230 |
| rs954506   | 17 | 48040637 | T | 0.00728 |
| rs2319988  | 17 | 48040777 | T | 0.00935 |
| rs1492198  | 17 | 48051058 | C | 0.01422 |
| rs2467486  | 17 | 48058862 | A | 0.01519 |

|            |    |          |   |         |
|------------|----|----------|---|---------|
| rs1492227  | 17 | 48072908 | G | 0.00742 |
| rs2452247  | 17 | 48093607 | A | 0.01464 |
| rs2452248  | 17 | 48093793 | G | 0.01568 |
| rs1907667  | 17 | 48094974 | A | 0.01575 |
| rs2452249  | 17 | 48096000 | A | 0.01562 |
| rs10515023 | 17 | 48121473 | G | 0.00463 |
| rs4329953  | 17 | 48165146 | G | 0.01667 |
| rs4451995  | 17 | 48192021 | G | 0.00231 |
| rs11871098 | 17 | 48196285 | G | 0.00889 |
| rs10515026 | 17 | 48205748 | C | 0.00815 |
| rs807072   | 17 | 48664476 | A | 0.01404 |
| rs1607974  | 17 | 48666911 | T | 0.01293 |
| rs9898437  | 17 | 48669406 | C | 0.00102 |
| rs4271635  | 17 | 49239793 | T | 0.00858 |
| rs16954302 | 17 | 49633313 | C | 0.00705 |
| rs979800   | 17 | 49663220 | C | 0.00236 |
| rs1396087  | 17 | 49667564 | C | 0.01566 |
| rs2958872  | 17 | 50262885 | G | 0.01042 |
| rs2934884  | 17 | 50273901 | G | 0.01386 |
| rs11658131 | 17 | 50298397 | T | 0.00208 |
| rs1013100  | 17 | 50628823 | C | 0.00305 |
| rs17817743 | 17 | 50666251 | G | 0.01511 |
| rs244401   | 17 | 50675059 | A | 0.01351 |
| rs4794571  | 17 | 50800645 | T | 0.01301 |
| rs6504972  | 17 | 50956167 | A | 0.01333 |
| rs12940304 | 17 | 50962748 | C | 0.00707 |
| rs1396214  | 17 | 50963972 | T | 0.00795 |
| rs7220324  | 17 | 50976491 | A | 0.00602 |
| rs1876520  | 17 | 50976704 | G | 0.01326 |
| rs4239197  | 17 | 50978009 | A | 0.00762 |
| rs878601   | 17 | 50995441 | G | 0.01632 |
| rs8067664  | 17 | 50999345 | A | 0.01488 |
| rs8080325  | 17 | 51004530 | T | 0.01378 |
| rs8080344  | 17 | 51004571 | A | 0.01545 |
| rs7211277  | 17 | 51009466 | A | 0.01628 |
| rs7211426  | 17 | 51009547 | A | 0.01085 |
| rs986959   | 17 | 51020804 | G | 0.00182 |
| rs17819647 | 17 | 51021347 | A | 0.01391 |
| rs9912785  | 17 | 51025593 | G | 0.00826 |
| rs9905891  | 17 | 51041857 | C | 0.01545 |
| rs9891412  | 17 | 51055766 | A | 0.01416 |
| rs9907033  | 17 | 51070449 | G | 0.01621 |
| rs16956163 | 17 | 51077176 | T | 0.01231 |
| rs8079136  | 17 | 51262804 | T | 0.00130 |

|            |    |          |   |         |
|------------|----|----------|---|---------|
| rs6505061  | 17 | 51944619 | C | 0.01571 |
| rs1879143  | 17 | 52113556 | G | 0.01338 |
| rs887088   | 17 | 52113654 | G | 0.00964 |
| rs3914803  | 17 | 52175286 | A | 0.01275 |
| rs792402   | 17 | 52773732 | A | 0.00957 |
| rs792387   | 17 | 52784443 | C | 0.01603 |
| rs9904395  | 17 | 52790274 | T | 0.01583 |
| rs8069761  | 17 | 52859940 | A | 0.01219 |
| rs277067   | 17 | 52920675 | G | 0.00551 |
| rs2586103  | 17 | 53233479 | C | 0.01108 |
| rs3785489  | 17 | 53271570 | G | 0.00018 |
| rs2003537  | 17 | 53966870 | G | 0.01348 |
| rs7208331  | 17 | 56055974 | G | 0.00318 |
| rs10853034 | 17 | 56939347 | C | 0.00976 |
| rs12451501 | 17 | 57602509 | G | 0.01664 |
| rs4968413  | 17 | 57618904 | T | 0.01232 |
| rs4968414  | 17 | 57618993 | A | 0.01641 |
| rs888500   | 17 | 57804047 | T | 0.00302 |
| rs6504112  | 17 | 58034200 | A | 0.00991 |
| rs2303575  | 17 | 59958641 | G | 0.01074 |
| rs2676289  | 17 | 60136200 | G | 0.00043 |
| rs16960881 | 17 | 60609580 | T | 0.00396 |
| rs9915678  | 17 | 60684655 | G | 0.00432 |
| rs17689972 | 17 | 60686487 | G | 0.00648 |
| rs17763899 | 17 | 60731999 | A | 0.00753 |
| rs9910773  | 17 | 60732937 | T | 0.01279 |
| rs41390346 | 17 | 60754695 | G | 0.01471 |
| rs16962248 | 17 | 60824816 | A | 0.01223 |
| rs9910440  | 17 | 60878885 | T | 0.00528 |
| rs9908987  | 17 | 60878953 | C | 0.00671 |
| rs9912807  | 17 | 60916642 | G | 0.00324 |
| rs7222221  | 17 | 61064830 | C | 0.00906 |
| rs9903792  | 17 | 61777799 | T | 0.01099 |
| rs956952   | 17 | 61948969 | A | 0.01404 |
| rs16959508 | 17 | 61949724 | G | 0.01185 |
| rs16959514 | 17 | 61952114 | A | 0.01379 |
| rs4791017  | 17 | 62313154 | G | 0.01504 |
| rs1005381  | 17 | 62367674 | A | 0.01555 |
| rs4791003  | 17 | 62375734 | A | 0.00208 |
| rs3764855  | 17 | 63756173 | A | 0.01324 |
| rs12937830 | 17 | 63845903 | C | 0.00896 |
| rs6501429  | 17 | 63905284 | G | 0.00789 |
| rs2909218  | 17 | 63976141 | C | 0.00981 |
| rs9909182  | 17 | 64312755 | C | 0.01362 |

|            |    |          |   |         |
|------------|----|----------|---|---------|
| rs2302133  | 17 | 64593327 | G | 0.00509 |
| rs41496448 | 17 | 64702744 | C | 0.00054 |
| rs1013996  | 17 | 65575226 | A | 0.00715 |
| rs3760393  | 17 | 65581802 | T | 0.01230 |
| rs10221235 | 17 | 65605507 | G | 0.00451 |
| rs9898954  | 17 | 65726365 | A | 0.00146 |
| rs17715597 | 17 | 65898815 | T | 0.01635 |
| rs6501398  | 17 | 66017832 | C | 0.01169 |
| rs10459889 | 17 | 66453810 | A | 0.01143 |
| rs2367252  | 17 | 66612839 | C | 0.01032 |
| rs1011729  | 17 | 66699182 | A | 0.01024 |
| rs16976580 | 17 | 66884852 | C | 0.00250 |
| rs16976604 | 17 | 66918722 | T | 0.01589 |
| rs17766990 | 17 | 67046796 | G | 0.01078 |
| rs11867831 | 17 | 67529503 | T | 0.00350 |
| rs41446845 | 17 | 67730661 | G | 0.01657 |
| rs11077623 | 17 | 68184295 | C | 0.00607 |
| rs7503479  | 17 | 68306057 | C | 0.01105 |
| rs17183225 | 17 | 68424032 | T | 0.01439 |
| rs16977552 | 17 | 68763760 | T | 0.01352 |
| rs2683165  | 17 | 69257571 | A | 0.00942 |
| rs2683164  | 17 | 69257822 | C | 0.01105 |
| rs11650448 | 17 | 69496127 | A | 0.01103 |
| rs7406894  | 17 | 69565646 | A | 0.00616 |
| rs6501689  | 17 | 69566767 | C | 0.01110 |
| rs8073660  | 17 | 69813027 | A | 0.01222 |
| rs4788843  | 17 | 70039686 | T | 0.00797 |
| rs4789189  | 17 | 70909580 | G | 0.01465 |
| rs6501805  | 17 | 70967523 | C | 0.01315 |
| rs2278826  | 17 | 71674592 | C | 0.01229 |
| rs11077873 | 17 | 72384500 | G | 0.00564 |
| rs582096   | 17 | 72415372 | G | 0.00418 |
| rs17609991 | 17 | 72540597 | A | 0.00842 |
| rs7220979  | 17 | 74116045 | C | 0.00898 |
| rs11654023 | 17 | 74467863 | C | 0.00992 |
| rs8074370  | 17 | 74468926 | A | 0.00779 |
| rs7223911  | 17 | 74743681 | A | 0.01666 |
| rs4243244  | 17 | 75465682 | A | 0.01588 |
| rs7213696  | 17 | 76335766 | C | 0.01453 |
| rs2138125  | 17 | 76403084 | G | 0.00220 |
| rs2289762  | 17 | 76473705 | T | 0.01539 |
| rs11868024 | 17 | 77286571 | T | 0.01520 |
| rs9674648  | 17 | 77690045 | G | 0.00365 |
| rs7209788  | 17 | 78009203 | C | 0.00423 |



|            |    |         |   |          |
|------------|----|---------|---|----------|
| rs16942962 | 18 | 334459  | C | 0.01602  |
| rs1471520  | 18 | 475410  | A | 0.01363  |
| rs2219281  | 18 | 603020  | T | 0.00742  |
| rs2846807  | 18 | 891686  | A | 0.00915  |
| rs9954574  | 18 | 983637  | G | 0.01276  |
| rs789073   | 18 | 998431  | A | 0.01278  |
| rs1847722  | 18 | 1155853 | A | 0.00817  |
| rs1826508  | 18 | 1196984 | A | 0.00383  |
| rs754905   | 18 | 1814510 | G | 0.00127  |
| rs482992   | 18 | 2069540 | C | 0.00500  |
| rs670003   | 18 | 2228246 | T | 0.00193  |
| rs689104   | 18 | 2664799 | T | 0.00225  |
| rs614841   | 18 | 2840631 | C | 0.00409  |
| rs613796   | 18 | 2862449 | A | 0.00689  |
| rs10460009 | 18 | 2938029 | T | 0.01042  |
| rs948298   | 18 | 3079522 | G | 0.00104  |
| rs10468743 | 18 | 3454043 | G | 0.00551  |
| rs1791375  | 18 | 3603827 | T | 0.00270  |
| rs1791397  | 18 | 3646607 | C | 0.00198  |
| rs3745050  | 18 | 3732572 | G | 0.01303  |
| rs11873533 | 18 | 3732713 | T | 0.01259  |
| rs1815957  | 18 | 3736382 | C | 0.00975  |
| rs8085007  | 18 | 4014459 | A | 0.00582  |
| rs1437622  | 18 | 4598852 | A | 0.01030  |
| rs7243287  | 18 | 4646266 | G | 0.00621  |
| rs11081144 | 18 | 4696335 | T | 0.01399  |
| rs1940848  | 18 | 4700778 | A | 0.01265  |
| rs4797180  | 18 | 4720655 | A | 0.01122  |
| rs8091193  | 18 | 4720882 | G | 0.01601  |
| rs16948141 | 18 | 5403815 | C | 0.00062  |
| rs1719963  | 18 | 5541804 | A | 0.00252  |
| rs8090286  | 18 | 5552155 | C | 0.00737  |
| rs16949431 | 18 | 6095967 | G | 0.01332  |
| rs403814   | 18 | 6272593 | C | 0.01250  |
| rs1452539  | 18 | 6277726 | G | 0.01074  |
| rs3898848  | 18 | 6284119 | T | 0.00802  |
| rs17502069 | 18 | 6318558 | A | 16.37100 |
| rs186884   | 18 | 6327489 | C | 0.01505  |
| rs6506406  | 18 | 6522077 | C | 0.01513  |
| rs1941509  | 18 | 6616372 | T | 0.00963  |
| rs658121   | 18 | 6967044 | G | 0.01439  |
| rs1790518  | 18 | 6967110 | A | 0.00797  |
| rs686378   | 18 | 6968725 | G | 0.00842  |
| rs607230   | 18 | 6970523 | A | 0.00435  |

|            |    |          |   |         |
|------------|----|----------|---|---------|
| rs8094220  | 18 | 7205275  | G | 0.00459 |
| rs9966939  | 18 | 7214416  | T | 0.00996 |
| rs11081339 | 18 | 7476992  | A | 0.00013 |
| rs616019   | 18 | 7733140  | A | 0.00166 |
| rs727951   | 18 | 7830668  | C | 0.01595 |
| rs7239786  | 18 | 7937846  | G | 0.01571 |
| rs11081349 | 18 | 7967468  | C | 0.01031 |
| rs663105   | 18 | 8116599  | G | 0.01310 |
| rs687245   | 18 | 8128090  | C | 0.00209 |
| rs646684   | 18 | 8346972  | A | 0.01005 |
| rs12457756 | 18 | 8491545  | C | 0.01057 |
| rs12454304 | 18 | 8493565  | T | 0.00530 |
| rs17582905 | 18 | 8558109  | C | 0.01371 |
| rs12956492 | 18 | 8940560  | T | 0.00574 |
| rs9973176  | 18 | 9019558  | T | 0.00308 |
| rs6506633  | 18 | 9019580  | T | 0.01182 |
| rs4797356  | 18 | 9139437  | T | 0.00252 |
| rs745218   | 18 | 9541028  | G | 0.00588 |
| rs9946612  | 18 | 9567981  | A | 0.00758 |
| rs1031555  | 18 | 9751234  | C | 0.01190 |
| rs11662690 | 18 | 9825796  | C | 0.01541 |
| rs580428   | 18 | 10013675 | T | 0.00876 |
| rs16956115 | 18 | 10019871 | C | 0.01456 |
| rs7245342  | 18 | 10042043 | T | 0.01407 |
| rs7232833  | 18 | 10177407 | G | 0.01214 |
| rs206614   | 18 | 10321765 | C | 0.00329 |
| rs547668   | 18 | 10466821 | C | 0.00540 |
| rs12455464 | 18 | 10891807 | C | 0.00802 |
| rs264271   | 18 | 10914184 | T | 0.01503 |
| rs264270   | 18 | 10915419 | T | 0.00109 |
| rs264268   | 18 | 10916135 | G | 0.01449 |
| rs264263   | 18 | 10918393 | A | 0.01483 |
| rs3246     | 18 | 11001381 | C | 0.00984 |
| rs1471671  | 18 | 11003889 | G | 0.00283 |
| rs2625358  | 18 | 11010599 | C | 0.01306 |
| rs2584749  | 18 | 11029431 | C | 0.00082 |
| rs9961728  | 18 | 11099184 | G | 0.01481 |
| rs9950681  | 18 | 11206305 | C | 0.00809 |
| rs2161961  | 18 | 11764500 | A | 0.00214 |
| rs9303749  | 18 | 11792991 | C | 0.00398 |
| rs2849395  | 18 | 12034410 | A | 0.01530 |
| rs34518007 | 18 | 12425306 | A | 0.01436 |
| rs1864532  | 18 | 12559486 | C | 0.00942 |
| rs2542151  | 18 | 12769947 | G | 0.00646 |

|            |    |          |   |         |
|------------|----|----------|---|---------|
| rs2847297  | 18 | 12787694 | G | 0.01229 |
| rs7234029  | 18 | 12867060 | T | 0.01099 |
| rs12607152 | 18 | 13086403 | C | 0.01452 |
| rs1284412  | 18 | 13542887 | G | 0.01370 |
| rs8097240  | 18 | 13729959 | G | 0.00304 |
| rs1942672  | 18 | 13736992 | A | 0.00180 |
| rs11659762 | 18 | 13750954 | T | 0.01270 |
| rs6505850  | 18 | 13839297 | A | 0.01232 |
| rs948324   | 18 | 13842419 | A | 0.00777 |
| rs1941092  | 18 | 13861956 | C | 0.01560 |
| rs4800111  | 18 | 18059967 | T | 0.01352 |
| rs16964883 | 18 | 18060812 | T | 0.00622 |
| rs34069471 | 18 | 18236452 | C | 0.00864 |
| rs17259667 | 18 | 19994190 | C | 0.00006 |
| rs12709785 | 18 | 20148975 | T | 0.00147 |
| rs2588567  | 18 | 20154446 | G | 0.00932 |
| rs949317   | 18 | 20373827 | T | 0.01335 |
| rs11873809 | 18 | 20539276 | C | 0.01402 |
| rs17187933 | 18 | 20556033 | C | 0.01540 |
| rs17203977 | 18 | 20653546 | C | 0.00759 |
| rs1668839  | 18 | 20745294 | T | 0.01420 |
| rs17798760 | 18 | 20813646 | T | 0.01570 |
| rs6508341  | 18 | 20825396 | C | 0.00414 |
| rs8090665  | 18 | 20841181 | A | 0.01441 |
| rs1786732  | 18 | 21636779 | G | 0.00562 |
| rs9966211  | 18 | 21650482 | A | 0.00215 |
| rs2879282  | 18 | 21776530 | T | 0.00392 |
| rs898864   | 18 | 22052167 | G | 0.01323 |
| rs4614811  | 18 | 22320274 | T | 0.00091 |
| rs1539814  | 18 | 22364136 | C | 0.00324 |
| rs573845   | 18 | 22450928 | A | 0.00031 |
| rs11663064 | 18 | 22621571 | C | 0.00027 |
| rs16958776 | 18 | 22664983 | A | 0.00841 |
| rs16943751 | 18 | 23402923 | G | 0.00277 |
| rs16943845 | 18 | 23445921 | G | 0.00194 |
| rs9949536  | 18 | 23459728 | A | 0.00343 |
| rs7236484  | 18 | 23491009 | A | 0.00484 |
| rs16943923 | 18 | 23493453 | G | 0.00274 |
| rs1944294  | 18 | 23870449 | T | 0.01258 |
| rs2140333  | 18 | 24241728 | T | 0.00956 |
| rs11663444 | 18 | 24426085 | A | 0.01367 |
| rs6508558  | 18 | 24482485 | A | 0.00250 |
| rs1496478  | 18 | 24522961 | T | 0.01309 |
| rs12955010 | 18 | 24964220 | G | 0.01471 |

|            |    |          |   |         |
|------------|----|----------|---|---------|
| rs8093176  | 18 | 25784705 | A | 0.01333 |
| rs1404432  | 18 | 25906310 | T | 0.00783 |
| rs16948053 | 18 | 26265288 | A | 0.00460 |
| rs41326652 | 18 | 27153029 | T | 0.00353 |
| rs16962700 | 18 | 27947520 | G | 0.00193 |
| rs10502585 | 18 | 28053311 | G | 0.00620 |
| rs9963993  | 18 | 28075158 | G | 0.01268 |
| rs16962918 | 18 | 28095530 | T | 0.00846 |
| rs16962971 | 18 | 28119201 | T | 0.00747 |
| rs35779665 | 18 | 28211234 | A | 0.00798 |
| rs10502599 | 18 | 28284188 | A | 0.01212 |
| rs1426723  | 18 | 28394022 | T | 0.01600 |
| rs12456916 | 18 | 28554107 | T | 0.01037 |
| rs12456996 | 18 | 28554420 | T | 0.01338 |
| rs12454409 | 18 | 28554509 | G | 0.00443 |
| rs9675424  | 18 | 28642306 | C | 0.01438 |
| rs271441   | 18 | 28943823 | A | 0.00758 |
| rs7243667  | 18 | 29127683 | G | 0.01299 |
| rs6507016  | 18 | 29181773 | A | 0.01282 |
| rs6507040  | 18 | 29285278 | T | 0.00724 |
| rs1389535  | 18 | 29564414 | G | 0.00966 |
| rs9956918  | 18 | 29569876 | G | 0.00453 |
| rs6507060  | 18 | 29576276 | T | 0.01531 |
| rs9947894  | 18 | 29582718 | T | 0.01377 |
| rs1565784  | 18 | 29612489 | T | 0.01049 |
| rs12958029 | 18 | 29642678 | A | 0.01247 |
| rs12457802 | 18 | 29643863 | G | 0.01506 |
| rs4435332  | 18 | 29920866 | A | 0.01249 |
| rs16965408 | 18 | 30376497 | G | 0.00997 |
| rs566408   | 18 | 30919759 | G | 0.00877 |
| rs1944323  | 18 | 31933579 | C | 0.00783 |
| rs729394   | 18 | 32200578 | G | 0.00390 |
| rs894775   | 18 | 33124749 | G | 0.00088 |
| rs1786793  | 18 | 33261753 | C | 0.01649 |
| rs10853440 | 18 | 33312662 | T | 0.00267 |
| rs16969649 | 18 | 33911399 | T | 0.01515 |
| rs8091939  | 18 | 33914511 | A | 0.00851 |
| rs979433   | 18 | 33924324 | C | 0.00434 |
| rs12150709 | 18 | 33927540 | C | 0.01618 |
| rs9952844  | 18 | 33941894 | A | 0.00064 |
| rs9950528  | 18 | 34016459 | C | 0.00708 |
| rs1145558  | 18 | 34208002 | C | 0.00209 |
| rs11665456 | 18 | 34283162 | T | 0.00443 |
| rs9304191  | 18 | 34283363 | A | 0.01455 |

|            |    |          |   |         |
|------------|----|----------|---|---------|
| rs16970229 | 18 | 34287621 | T | 0.01025 |
| rs867752   | 18 | 34290429 | T | 0.01509 |
| rs16970360 | 18 | 34307641 | A | 0.01182 |
| rs9947632  | 18 | 34316559 | G | 0.01542 |
| rs890476   | 18 | 34356944 | A | 0.01232 |
| rs11877551 | 18 | 34545845 | T | 0.00395 |
| rs12969426 | 18 | 34677807 | G | 0.00777 |
| rs1370193  | 18 | 36512481 | G | 0.01548 |
| rs1941575  | 18 | 37078326 | T | 0.00273 |
| rs11875967 | 18 | 37199733 | C | 0.00961 |
| rs16974563 | 18 | 37214111 | A | 0.01271 |
| rs346443   | 18 | 38200013 | A | 0.00395 |
| rs12373388 | 18 | 38395988 | A | 0.01309 |
| rs2878722  | 18 | 38437616 | A | 0.01518 |
| rs7236977  | 18 | 38485488 | C | 0.00100 |
| rs598658   | 18 | 38579747 | C | 0.00070 |
| rs567325   | 18 | 38580258 | C | 0.00228 |
| rs16977355 | 18 | 39014989 | G | 0.00743 |
| rs672862   | 18 | 39276981 | G | 0.00056 |
| rs16977675 | 18 | 39650092 | G | 0.00391 |
| rs12458722 | 18 | 39650277 | A | 0.00490 |
| rs1380834  | 18 | 39651882 | C | 0.00498 |
| rs978490   | 18 | 40178035 | T | 0.00371 |
| rs8087876  | 18 | 40269659 | G | 0.01606 |
| rs16978001 | 18 | 40287441 | C | 0.01216 |
| rs2063503  | 18 | 40291585 | C | 0.00627 |
| rs7230479  | 18 | 40298960 | T | 0.01017 |
| rs9957037  | 18 | 40302212 | A | 0.01290 |
| rs2359894  | 18 | 40309270 | G | 0.01666 |
| rs12605825 | 18 | 40322004 | A | 0.00942 |
| rs12456054 | 18 | 40331423 | G | 0.01496 |
| rs8084507  | 18 | 40340980 | T | 0.01469 |
| rs16978185 | 18 | 40658036 | G | 0.00555 |
| rs7228870  | 18 | 40779809 | C | 0.00678 |
| rs537380   | 18 | 41567307 | T | 0.00504 |
| rs7235217  | 18 | 42238423 | G | 0.01559 |
| rs11873913 | 18 | 42270136 | A | 0.00037 |
| rs17768724 | 18 | 42399301 | G | 0.01529 |
| rs41471844 | 18 | 42545438 | C | 0.00739 |
| rs8091926  | 18 | 43305157 | A | 0.00082 |
| rs16954613 | 18 | 43335567 | A | 0.01097 |
| rs4940159  | 18 | 43762177 | C | 0.00438 |
| rs7504329  | 18 | 43860140 | A | 0.00669 |
| rs6507802  | 18 | 43865465 | G | 0.01008 |

|            |    |          |   |         |
|------------|----|----------|---|---------|
| rs1873128  | 18 | 44195305 | C | 0.01414 |
| rs4939776  | 18 | 44233865 | G | 0.00728 |
| rs5029382  | 18 | 44235524 | A | 0.00616 |
| rs1512177  | 18 | 44272557 | G | 0.01638 |
| rs1564591  | 18 | 44533402 | A | 0.01407 |
| rs8087872  | 18 | 44546971 | G | 0.00851 |
| rs1994559  | 18 | 44586356 | A | 0.01364 |
| rs833509   | 18 | 44782785 | G | 0.01482 |
| rs4939846  | 18 | 44970083 | A | 0.00603 |
| rs11661691 | 18 | 45024184 | C | 0.00731 |
| rs11662738 | 18 | 45027558 | A | 0.01568 |
| rs17660456 | 18 | 45939578 | C | 0.00668 |
| rs1511155  | 18 | 45971240 | A | 0.01204 |
| rs8085254  | 18 | 46036147 | T | 0.01246 |
| rs2082347  | 18 | 47292109 | G | 0.01613 |
| rs7231303  | 18 | 47317269 | A | 0.00798 |
| rs7227533  | 18 | 47836342 | T | 0.01078 |
| rs4423510  | 18 | 47962726 | A | 0.00526 |
| rs12456856 | 18 | 47984154 | C | 0.00296 |
| rs3910788  | 18 | 48100001 | G | 0.00940 |
| rs17754011 | 18 | 48125662 | A | 0.00715 |
| rs7240312  | 18 | 48157360 | A | 0.01289 |
| rs948590   | 18 | 48378926 | A | 0.00913 |
| rs4452042  | 18 | 48528882 | A | 0.00373 |
| rs41331848 | 18 | 48606187 | G | 0.00556 |
| rs7235008  | 18 | 48886811 | T | 0.01316 |
| rs16956399 | 18 | 49015687 | A | 0.00326 |
| rs4569360  | 18 | 49703051 | G | 0.01126 |
| rs1978357  | 18 | 50701059 | T | 0.00926 |
| rs784237   | 18 | 51567112 | T | 0.00522 |
| rs17203781 | 18 | 52003906 | A | 0.00798 |
| rs1789596  | 18 | 52003947 | G | 0.00546 |
| rs12455746 | 18 | 52175640 | T | 0.01594 |
| rs620024   | 18 | 52367467 | T | 0.00052 |
| rs7237084  | 18 | 52746016 | G | 0.00051 |
| rs9954313  | 18 | 52783500 | G | 0.01281 |
| rs2849463  | 18 | 53205665 | C | 0.00406 |
| rs4940804  | 18 | 53313517 | T | 0.00702 |
| rs7235134  | 18 | 53340294 | G | 0.01396 |
| rs7243988  | 18 | 53398452 | A | 0.01625 |
| rs17759803 | 18 | 53666463 | G | 0.00717 |
| rs3897751  | 18 | 53683532 | C | 0.00472 |
| rs7232704  | 18 | 53739262 | C | 0.00195 |
| rs12960285 | 18 | 53806455 | C | 0.01112 |

|            |    |          |   |         |
|------------|----|----------|---|---------|
| rs12960965 | 18 | 53973820 | G | 0.00696 |
| rs486117   | 18 | 53982695 | G | 0.00474 |
| rs8086176  | 18 | 54618100 | G | 0.01330 |
| rs12969520 | 18 | 54694937 | C | 0.01440 |
| rs17694691 | 18 | 54697058 | C | 0.01276 |
| rs11872224 | 18 | 54730364 | A | 0.00941 |
| rs922048   | 18 | 55027366 | A | 0.00322 |
| rs2048884  | 18 | 55054133 | T | 0.00168 |
| rs8088790  | 18 | 55230517 | G | 0.01528 |
| rs9319950  | 18 | 55238263 | A | 0.01358 |
| rs7230906  | 18 | 55249616 | G | 0.00937 |
| rs632248   | 18 | 55306738 | A | 0.01281 |
| rs1429577  | 18 | 55508632 | T | 0.01253 |
| rs2852356  | 18 | 55511113 | G | 0.01022 |
| rs17700926 | 18 | 56182895 | C | 0.00643 |
| rs520432   | 18 | 56325505 | T | 0.01015 |
| rs881474   | 18 | 56338128 | T | 0.00718 |
| rs17067050 | 18 | 56362278 | C | 0.00319 |
| rs579054   | 18 | 56374311 | G | 0.00001 |
| rs12455952 | 18 | 56991498 | T | 0.00982 |
| rs17068170 | 18 | 57145389 | C | 0.00171 |
| rs2159595  | 18 | 57231116 | C | 0.00546 |
| rs9783862  | 18 | 57350414 | T | 0.00776 |
| rs11875000 | 18 | 57357460 | C | 0.01555 |
| rs10469239 | 18 | 57551453 | G | 0.01041 |
| rs9960910  | 18 | 57623326 | A | 0.00303 |
| rs9963722  | 18 | 57627449 | C | 0.01547 |
| rs948783   | 18 | 57733482 | G | 0.00134 |
| rs2116334  | 18 | 57798480 | A | 0.00018 |
| rs1346949  | 18 | 57798816 | A | 0.01555 |
| rs1431583  | 18 | 57811523 | A | 0.00521 |
| rs1431584  | 18 | 57811870 | C | 0.01643 |
| rs1030582  | 18 | 57886440 | T | 0.00140 |
| rs17634631 | 18 | 57886973 | T | 0.01116 |
| rs9319997  | 18 | 57925017 | C | 0.00471 |
| rs17641823 | 18 | 57927708 | T | 0.00716 |
| rs17069686 | 18 | 58092234 | G | 0.00439 |
| rs2980973  | 18 | 58228744 | T | 0.01186 |
| rs17729447 | 18 | 58317240 | C | 0.00596 |
| rs2053600  | 18 | 58586761 | A | 0.00516 |
| rs611263   | 18 | 59441237 | G | 0.01182 |
| rs1522725  | 18 | 59555590 | A | 0.00265 |
| rs4941238  | 18 | 59855507 | A | 0.00290 |
| rs4493166  | 18 | 60000627 | C | 0.00611 |

|            |    |          |   |          |
|------------|----|----------|---|----------|
| rs778771   | 18 | 60600790 | G | 0.00101  |
| rs9675615  | 18 | 60637216 | A | 0.00732  |
| rs7244664  | 18 | 61626782 | C | 0.01564  |
| rs1994230  | 18 | 61627079 | A | 0.00994  |
| rs205084   | 18 | 61736852 | G | 0.01627  |
| rs41391050 | 18 | 61791104 | A | 0.00361  |
| rs4283324  | 18 | 62246545 | T | 0.01238  |
| rs512660   | 18 | 62455640 | G | 0.00421  |
| rs41531148 | 18 | 62470551 | A | 0.01018  |
| rs370944   | 18 | 63405367 | C | 0.00658  |
| rs519360   | 18 | 63641058 | T | 0.00846  |
| rs2000748  | 18 | 64266988 | A | 0.01131  |
| rs2665375  | 18 | 64471274 | C | 0.00578  |
| rs1893438  | 18 | 64662990 | G | 0.01531  |
| rs1539896  | 18 | 64663123 | G | 0.01468  |
| rs8099382  | 18 | 64696866 | T | 0.01233  |
| rs1154907  | 18 | 65030427 | A | 0.01260  |
| rs4513200  | 18 | 65399549 | G | 11.50100 |
| rs4605265  | 18 | 65406612 | C | 0.00653  |
| rs8088698  | 18 | 66074263 | G | 0.00248  |
| rs1510045  | 18 | 66498522 | C | 0.00912  |
| rs2221605  | 18 | 66722094 | T | 0.00901  |
| rs11151627 | 18 | 66817893 | A | 0.01082  |
| rs17181300 | 18 | 66933645 | G | 0.00264  |
| rs8098181  | 18 | 67014919 | C | 0.00088  |
| rs4599012  | 18 | 67022529 | T | 0.00747  |
| rs17277846 | 18 | 67023434 | T | 0.00284  |
| rs17193525 | 18 | 67045771 | C | 0.00328  |
| rs17281295 | 18 | 67097075 | C | 0.01063  |
| rs7229385  | 18 | 67508569 | C | 0.01433  |
| rs8094687  | 18 | 67591733 | T | 0.00650  |
| rs17225992 | 18 | 67593046 | A | 0.00980  |
| rs8083283  | 18 | 68150905 | A | 0.00510  |
| rs11151792 | 18 | 68555607 | A | 0.00033  |
| rs2469032  | 18 | 68900356 | A | 0.00938  |
| rs11661950 | 18 | 68926719 | T | 0.00563  |
| rs11661997 | 18 | 68926813 | G | 0.00377  |
| rs1503024  | 18 | 68942375 | A | 0.01223  |
| rs17751492 | 18 | 69259633 | G | 0.00376  |
| rs2703496  | 18 | 69452130 | T | 0.01250  |
| rs8095367  | 18 | 69473486 | G | 0.00956  |
| rs4892122  | 18 | 69473702 | C | 0.01072  |
| rs17763239 | 18 | 69473773 | A | 0.00504  |
| rs17763263 | 18 | 69473889 | T | 0.00284  |



|            |    |          |   |         |
|------------|----|----------|---|---------|
| rs6566752  | 18 | 69478734 | T | 0.00970 |
| rs8092542  | 18 | 69498117 | T | 0.00926 |
| rs9953978  | 18 | 69498407 | C | 0.00214 |
| rs1560435  | 18 | 69743651 | G | 0.00592 |
| rs4892163  | 18 | 69776553 | A | 0.00836 |
| rs8087590  | 18 | 69885704 | G | 0.00486 |
| rs12953403 | 18 | 70015084 | T | 0.00727 |
| rs8182439  | 18 | 70026851 | A | 0.00772 |
| rs7236071  | 18 | 70143274 | A | 0.01288 |
| rs4892204  | 18 | 70202402 | C | 0.00703 |
| rs2278154  | 18 | 70254762 | G | 0.00350 |
| rs2346061  | 18 | 70351512 | A | 0.00718 |
| rs9950997  | 18 | 71023637 | G | 0.01137 |
| rs9949463  | 18 | 71076264 | C | 0.00177 |
| rs17211841 | 18 | 71333707 | G | 0.00331 |
| rs1460280  | 18 | 71628170 | G | 0.01346 |
| rs11659458 | 18 | 71629102 | G | 0.01108 |
| rs7239549  | 18 | 71632405 | G | 0.00738 |
| rs4387675  | 18 | 71634911 | C | 0.00343 |
| rs2187254  | 18 | 71635578 | A | 0.01147 |
| rs7245337  | 18 | 71846998 | C | 0.01223 |
| rs11150924 | 18 | 71852221 | A | 0.01451 |
| rs17058719 | 18 | 71869249 | T | 0.00306 |
| rs724880   | 18 | 71944272 | C | 0.00249 |
| rs12969990 | 18 | 71982132 | A | 0.00973 |
| rs10514206 | 18 | 71984454 | T | 0.01236 |
| rs11875775 | 18 | 71985061 | A | 0.01590 |
| rs7226718  | 18 | 72105439 | G | 0.00242 |
| rs17059667 | 18 | 72466629 | A | 0.01398 |
| rs8083046  | 18 | 72603831 | G | 0.00362 |
| rs4890871  | 18 | 72613722 | T | 0.01316 |
| rs2406342  | 18 | 72617268 | T | 0.00530 |
| rs8088596  | 18 | 72620941 | C | 0.01391 |
| rs1789114  | 18 | 72985760 | T | 0.00572 |
| rs2051408  | 18 | 72989671 | G | 0.00527 |
| rs1789101  | 18 | 72995306 | A | 0.00925 |
| rs165152   | 18 | 73477482 | T | 0.01025 |
| rs4890980  | 18 | 73493301 | G | 0.01608 |
| rs1509794  | 18 | 73545515 | C | 0.00772 |
| rs1011233  | 18 | 74416249 | T | 0.01045 |
| rs11081641 | 18 | 74518948 | G | 0.01058 |
| rs2931057  | 18 | 74530754 | C | 0.00304 |
| rs4799232  | 18 | 74706295 | A | 0.00887 |
| rs6506808  | 18 | 76001711 | C | 0.01480 |

|            |    |          |   |         |
|------------|----|----------|---|---------|
| rs2030336  | 18 | 76037763 | T | 0.01531 |
| rs6506819  | 18 | 76103230 | A | 0.00245 |
| rs12456851 | 18 | 76115554 | G | 0.01132 |
| rs11084928 | 19 | 228776   | A | 0.01251 |
| rs4919850  | 19 | 507632   | C | 0.01059 |
| rs10415976 | 19 | 892603   | T | 0.00345 |
| rs8103188  | 19 | 1054465  | A | 0.00920 |
| rs873289   | 19 | 1126396  | T | 0.01616 |
| rs8109669  | 19 | 1867450  | G | 0.00789 |
| rs35391608 | 19 | 2097066  | C | 0.01180 |
| rs7249235  | 19 | 2193829  | A | 0.01070 |
| rs12610522 | 19 | 2364228  | T | 0.00829 |
| rs10424034 | 19 | 2533154  | T | 0.00961 |
| rs4806891  | 19 | 2898152  | A | 0.00700 |
| rs4807470  | 19 | 3394470  | A | 0.00156 |
| rs8112148  | 19 | 5524344  | C | 0.00816 |
| rs3097891  | 19 | 5694824  | A | 0.00509 |
| rs3787056  | 19 | 6193806  | G | 0.00801 |
| rs2241394  | 19 | 6636230  | G | 0.00044 |
| rs6512109  | 19 | 9380453  | A | 0.00043 |
| rs10439163 | 19 | 10506495 | C | 0.00780 |
| rs435368   | 19 | 11745524 | A | 0.00769 |
| rs799193   | 19 | 11752003 | T | 0.00752 |
| rs448446   | 19 | 11803254 | G | 0.01262 |
| rs12052059 | 19 | 13216068 | G | 0.00061 |
| rs12611029 | 19 | 13216633 | G | 0.00516 |
| rs2302080  | 19 | 13217380 | G | 0.00544 |
| rs1547984  | 19 | 13474965 | A | 0.01661 |
| rs10409198 | 19 | 13749347 | G | 0.01540 |
| rs682765   | 19 | 15562078 | T | 0.00490 |
| rs2733762  | 19 | 15638409 | T | 0.01576 |
| rs4808415  | 19 | 15901766 | A | 0.00408 |
| rs773916   | 19 | 16717864 | T | 0.00314 |
| rs10413542 | 19 | 17649940 | C | 0.01487 |
| rs432392   | 19 | 18016041 | C | 0.00348 |
| rs11086101 | 19 | 18228816 | A | 0.01029 |
| rs17711565 | 19 | 18268643 | T | 0.00953 |
| rs2057649  | 19 | 18550830 | G | 0.01473 |
| rs6511018  | 19 | 19047705 | G | 0.01052 |
| rs11668620 | 19 | 19079490 | C | 0.00820 |
| rs1050544  | 19 | 19148901 | G | 0.01219 |
| rs3787040  | 19 | 19158292 | G | 0.01193 |
| rs2011503  | 19 | 19304986 | T | 0.00199 |
| rs247796   | 19 | 19717139 | A | 0.01664 |

|            |    |          |   |          |
|------------|----|----------|---|----------|
| rs10411195 | 19 | 19897176 | T | 0.00505  |
| rs431157   | 19 | 20806839 | A | 0.01127  |
| rs9304978  | 19 | 20949730 | A | 0.00719  |
| rs7254957  | 19 | 21182564 | T | 0.00921  |
| rs279807   | 19 | 21257662 | T | 0.01560  |
| rs8104675  | 19 | 21683783 | A | 0.01575  |
| rs16999432 | 19 | 22564487 | T | 0.01589  |
| rs12973782 | 19 | 22696967 | C | 0.00507  |
| rs12980129 | 19 | 22700751 | C | 0.00602  |
| rs2195962  | 19 | 23531320 | C | 0.00825  |
| rs2217662  | 19 | 23534946 | A | 0.01662  |
| rs10417223 | 19 | 23620564 | G | 0.00008  |
| rs12462134 | 19 | 24042668 | T | 0.00665  |
| rs8111283  | 19 | 33005870 | A | 0.01007  |
| rs12976900 | 19 | 34128849 | G | 0.01226  |
| rs12975753 | 19 | 34193380 | T | 10.45500 |
| rs17686149 | 19 | 34395197 | T | 0.00784  |
| rs12460892 | 19 | 34456548 | A | 0.00783  |
| rs6509333  | 19 | 34468249 | T | 0.01212  |
| rs759632   | 19 | 34472578 | T | 0.01314  |
| rs10406799 | 19 | 34475403 | T | 0.00814  |
| rs11083894 | 19 | 34476307 | C | 0.00982  |
| rs17624382 | 19 | 34480470 | C | 0.01303  |
| rs4805419  | 19 | 34665208 | T | 0.00970  |
| rs16963567 | 19 | 35147120 | T | 0.00782  |
| rs1125867  | 19 | 35547491 | T | 0.01448  |
| rs4805632  | 19 | 36034752 | G | 0.00351  |
| rs8107562  | 19 | 36363983 | A | 0.00818  |
| rs1353534  | 19 | 36372570 | T | 0.01440  |
| rs1353535  | 19 | 36372820 | T | 0.00110  |
| rs8109968  | 19 | 36398251 | G | 0.00370  |
| rs7250559  | 19 | 36815751 | G | 0.00835  |
| rs10426491 | 19 | 37234862 | A | 0.00331  |
| rs4805724  | 19 | 37292850 | A | 0.00887  |
| rs7251402  | 19 | 37418474 | C | 0.00855  |
| rs2287680  | 19 | 38300406 | A | 0.00851  |
| rs1428669  | 19 | 38762105 | C | 0.00222  |
| rs7255249  | 19 | 38786025 | C | 0.01504  |
| rs4805930  | 19 | 38905294 | C | 0.00856  |
| rs8109447  | 19 | 39224676 | G | 0.01653  |
| rs4806003  | 19 | 39443146 | G | 0.01553  |
| rs10419491 | 19 | 39874797 | C | 0.01014  |
| rs4372809  | 19 | 39908149 | A | 0.00711  |
| rs2546024  | 19 | 40143170 | G | 0.00480  |

|            |    |          |   |         |
|------------|----|----------|---|---------|
| rs16970293 | 19 | 40590481 | C | 0.00761 |
| rs4805131  | 19 | 40789137 | T | 0.01411 |
| rs10500279 | 19 | 43726908 | G | 0.01636 |
| rs2960321  | 19 | 43740003 | A | 0.01654 |
| rs6508826  | 19 | 44117562 | C | 0.00676 |
| rs1034867  | 19 | 44910784 | C | 0.00151 |
| rs3922314  | 19 | 44958527 | C | 0.00121 |
| rs591505   | 19 | 45377815 | A | 0.01060 |
| rs2303723  | 19 | 45922835 | A | 0.00853 |
| rs7251950  | 19 | 46174582 | A | 0.01457 |
| rs10407348 | 19 | 46645270 | C | 0.01587 |
| rs7251960  | 19 | 46997883 | A | 0.00599 |
| rs1195296  | 19 | 47368321 | C | 0.00280 |
| rs2854508  | 19 | 48768004 | T | 0.01567 |
| rs2191566  | 19 | 49203229 | C | 0.00488 |
| rs7250439  | 19 | 49302344 | G | 0.00825 |
| rs16979266 | 19 | 49744084 | G | 0.01073 |
| rs846885   | 19 | 49802255 | G | 0.01415 |
| rs371657   | 19 | 51629571 | C | 0.00726 |
| rs11673207 | 19 | 52486521 | G | 0.00836 |
| rs274876   | 19 | 53372780 | T | 0.00914 |
| rs2638283  | 19 | 53932963 | A | 0.00564 |
| rs12104272 | 19 | 54839864 | A | 0.01593 |
| rs3170545  | 19 | 55128527 | C | 0.00255 |
| rs11883067 | 19 | 55232283 | T | 0.00866 |
| rs8103659  | 19 | 56077214 | G | 0.00722 |
| rs1122466  | 19 | 56183276 | G | 0.01093 |
| rs3826656  | 19 | 56418425 | G | 0.00909 |
| rs1551158  | 19 | 56771813 | A | 0.00498 |
| rs4802919  | 19 | 57490680 | G | 0.01375 |
| rs10426347 | 19 | 58604054 | C | 0.00595 |
| rs10422163 | 19 | 58686614 | A | 0.00427 |
| rs10411772 | 19 | 58740763 | C | 0.01306 |
| rs16960015 | 19 | 58741116 | T | 0.00281 |
| rs953751   | 19 | 58746598 | T | 0.01196 |
| rs11672056 | 19 | 59679872 | C | 0.00695 |
| rs41514951 | 19 | 59681854 | G | 0.01194 |
| rs1749296  | 19 | 59892210 | T | 0.00725 |
| rs11671922 | 19 | 60227101 | A | 0.00826 |
| rs4801624  | 19 | 60957621 | A | 0.00592 |
| rs10426177 | 19 | 60960908 | T | 0.01182 |
| rs6509975  | 19 | 61165272 | G | 0.01292 |
| rs379192   | 19 | 61262009 | T | 0.01342 |
| rs12709959 | 19 | 61660126 | A | 0.01271 |

|            |    |          |   |         |
|------------|----|----------|---|---------|
| rs10405702 | 19 | 61760798 | G | 0.01464 |
| rs9967637  | 19 | 61942710 | C | 0.00438 |
| rs6510070  | 19 | 62653424 | T | 0.00252 |
| rs7247474  | 19 | 62658274 | A | 0.01207 |
| rs6510081  | 19 | 62689746 | C | 0.01366 |
| rs10407412 | 19 | 62771618 | G | 0.01500 |
| rs10414608 | 19 | 62773680 | G | 0.00778 |
| rs10405036 | 19 | 62784856 | T | 0.00371 |
| rs6052239  | 20 | 401461   | G | 0.01179 |
| rs4362630  | 20 | 498788   | T | 0.00622 |
| rs2317023  | 20 | 667740   | A | 0.01235 |
| rs6045664  | 20 | 1888145  | T | 0.00076 |
| rs16983952 | 20 | 2262610  | T | 0.01263 |
| rs2422740  | 20 | 2302886  | A | 0.00517 |
| rs2422741  | 20 | 2303387  | T | 0.01476 |
| rs2038246  | 20 | 2575370  | T | 0.00304 |
| rs8125955  | 20 | 2967957  | T | 0.00249 |
| rs6138990  | 20 | 2970618  | A | 0.00583 |
| rs4813669  | 20 | 4040860  | T | 0.01239 |
| rs1765003  | 20 | 4083849  | A | 0.00015 |
| rs297690   | 20 | 4374656  | G | 0.00506 |
| rs6139427  | 20 | 4380150  | G | 0.00060 |
| rs2245220  | 20 | 4653718  | T | 0.01002 |
| rs2422975  | 20 | 4710869  | G | 0.00023 |
| rs16990301 | 20 | 4783415  | A | 0.01182 |
| rs7273837  | 20 | 5237481  | C | 0.00110 |
| rs6085118  | 20 | 5274616  | C | 0.01607 |
| rs10485491 | 20 | 5376663  | G | 0.01115 |
| rs805730   | 20 | 5647265  | A | 0.00047 |
| rs1287079  | 20 | 5821144  | T | 0.00216 |
| rs6054006  | 20 | 6158644  | A | 0.01050 |
| rs6038399  | 20 | 6187082  | A | 0.01050 |
| rs6117259  | 20 | 6368731  | G | 0.00120 |
| rs6085671  | 20 | 6673829  | C | 0.01215 |
| rs6140264  | 20 | 7324354  | C | 0.00584 |
| rs6055172  | 20 | 7539005  | G | 0.00686 |
| rs6133443  | 20 | 7539377  | A | 0.00077 |
| rs17403161 | 20 | 7578428  | T | 0.01339 |
| rs729944   | 20 | 7636055  | T | 0.00267 |
| rs6055889  | 20 | 8465505  | A | 0.00876 |
| rs6056523  | 20 | 9240176  | T | 0.01259 |
| rs6086852  | 20 | 9281616  | C | 0.01245 |
| rs6056690  | 20 | 9475353  | T | 0.01517 |
| rs747996   | 20 | 9576822  | C | 0.00630 |

|            |    |          |   |         |
|------------|----|----------|---|---------|
| rs2092382  | 20 | 9727927  | G | 0.00386 |
| rs6118852  | 20 | 9935409  | A | 0.00120 |
| rs2327262  | 20 | 10117643 | C | 0.00061 |
| rs363029   | 20 | 10165497 | T | 0.00844 |
| rs2327267  | 20 | 10166376 | A | 0.00956 |
| rs363035   | 20 | 10166958 | A | 0.01131 |
| rs6077844  | 20 | 10527996 | C | 0.01602 |
| rs6074184  | 20 | 10690290 | A | 0.00094 |
| rs6078023  | 20 | 10969917 | A | 0.00609 |
| rs209939   | 20 | 10974397 | C | 0.01117 |
| rs2423542  | 20 | 11042509 | A | 0.00872 |
| rs6040446  | 20 | 11156822 | A | 0.01311 |
| rs2327367  | 20 | 11180291 | T | 0.00731 |
| rs6040477  | 20 | 11180689 | G | 0.01388 |
| rs8119263  | 20 | 11281035 | C | 0.00077 |
| rs2180286  | 20 | 11445272 | C | 0.00682 |
| rs6104763  | 20 | 11448108 | T | 0.01282 |
| rs714235   | 20 | 11538160 | C | 0.01377 |
| rs2223712  | 20 | 11903659 | G | 0.00248 |
| rs972047   | 20 | 12333222 | A | 0.00089 |
| rs6078631  | 20 | 12429269 | C | 0.01615 |
| rs17225893 | 20 | 12429805 | G | 0.01182 |
| rs10485757 | 20 | 12438269 | G | 0.00525 |
| rs6041427  | 20 | 12453962 | G | 0.01396 |
| rs6041542  | 20 | 12609944 | A | 0.01281 |
| rs6109532  | 20 | 12671173 | G | 0.00761 |
| rs646334   | 20 | 12939639 | T | 0.01223 |
| rs3910137  | 20 | 13026275 | C | 0.00559 |
| rs1321255  | 20 | 13087821 | T | 0.00222 |
| rs6033633  | 20 | 13089809 | G | 0.00365 |
| rs6042367  | 20 | 13736172 | G | 0.01068 |
| rs10485768 | 20 | 13746549 | T | 0.01568 |
| rs2260930  | 20 | 13896093 | A | 0.01204 |
| rs2208453  | 20 | 14210828 | T | 0.00700 |
| rs6079463  | 20 | 14423757 | C | 0.00894 |
| rs459322   | 20 | 15085117 | G | 0.00488 |
| rs175311   | 20 | 15171662 | C | 0.00455 |
| rs13039585 | 20 | 15343353 | T | 0.01408 |
| rs11698317 | 20 | 15376111 | G | 0.00511 |
| rs1816000  | 20 | 15462094 | A | 0.00445 |
| rs6135542  | 20 | 15733801 | T | 0.00773 |
| rs16996627 | 20 | 15756549 | A | 0.01413 |
| rs6080069  | 20 | 15905780 | G | 0.00035 |
| rs7273081  | 20 | 16074098 | A | 0.00009 |

|            |    |          |   |         |
|------------|----|----------|---|---------|
| rs16997388 | 20 | 16163763 | G | 0.00934 |
| rs6043844  | 20 | 16199668 | G | 0.00884 |
| rs4814533  | 20 | 16597513 | A | 0.00205 |
| rs6044450  | 20 | 16788158 | T | 0.00046 |
| rs6034740  | 20 | 17034061 | T | 0.00553 |
| rs761018   | 20 | 17405674 | T | 0.00578 |
| rs6044845  | 20 | 17413213 | C | 0.01022 |
| rs1076688  | 20 | 17419061 | A | 0.00458 |
| rs6080801  | 20 | 17652776 | G | 0.00697 |
| rs6034901  | 20 | 17697818 | T | 0.00215 |
| rs4814660  | 20 | 17728260 | C | 0.00981 |
| rs4814673  | 20 | 17816221 | A | 0.01080 |
| rs6045072  | 20 | 17827676 | G | 0.00521 |
| rs6035066  | 20 | 18464588 | G | 0.00226 |
| rs6046024  | 20 | 19294184 | C | 0.01563 |
| rs6075513  | 20 | 19396935 | T | 0.00430 |
| rs6046236  | 20 | 19596143 | A | 0.00050 |
| rs3828002  | 20 | 19650049 | T | 0.00358 |
| rs6046295  | 20 | 19675038 | G | 0.00339 |
| rs17371935 | 20 | 19754241 | G | 0.01183 |
| rs6046528  | 20 | 19932467 | G | 0.00881 |
| rs200184   | 20 | 19999890 | T | 0.01179 |
| rs6136938  | 20 | 20006992 | A | 0.01423 |
| rs1000269  | 20 | 20246483 | G | 0.01328 |
| rs6046790  | 20 | 20251376 | G | 0.01469 |
| rs17735720 | 20 | 20888051 | C | 0.01593 |
| rs6137189  | 20 | 20890571 | G | 0.01657 |
| rs1024207  | 20 | 21539481 | A | 0.00074 |
| rs6082475  | 20 | 21567273 | G | 0.01643 |
| rs2424400  | 20 | 21662807 | A | 0.00676 |
| rs8122229  | 20 | 21772282 | G | 0.00854 |
| rs2328682  | 20 | 21866288 | T | 0.01577 |
| rs201149   | 20 | 22038387 | T | 0.00237 |
| rs804516   | 20 | 22063729 | T | 0.01390 |
| rs6048024  | 20 | 22256842 | C | 0.00530 |
| rs6048084  | 20 | 22364829 | A | 0.01421 |
| rs6048105  | 20 | 22384129 | G | 0.00906 |
| rs6036119  | 20 | 22389124 | G | 0.01397 |
| rs2404492  | 20 | 22723615 | A | 0.00678 |
| rs926745   | 20 | 22765120 | C | 0.00333 |
| rs6083237  | 20 | 23656965 | T | 0.01189 |
| rs2071443  | 20 | 23807753 | A | 0.01206 |
| rs6049299  | 20 | 23931042 | T | 0.00793 |
| rs858141   | 20 | 24009950 | C | 0.00995 |

|            |    |          |   |         |
|------------|----|----------|---|---------|
| rs6036642  | 20 | 24027492 | C | 0.00594 |
| rs6049453  | 20 | 24088355 | T | 0.01105 |
| rs6049471  | 20 | 24102710 | T | 0.01476 |
| rs8116594  | 20 | 24107081 | C | 0.00869 |
| rs6049473  | 20 | 24107265 | C | 0.01022 |
| rs2749424  | 20 | 24135337 | C | 0.00984 |
| rs6049549  | 20 | 24182028 | T | 0.01581 |
| rs1016591  | 20 | 24291834 | T | 0.01473 |
| rs6049811  | 20 | 24537790 | G | 0.01339 |
| rs1985485  | 20 | 24963492 | C | 0.00389 |
| rs2387577  | 20 | 24996940 | G | 0.01529 |
| rs4815368  | 20 | 25009308 | A | 0.00362 |
| rs2387578  | 20 | 25044494 | G | 0.01506 |
| rs6119442  | 20 | 29548076 | G | 0.00739 |
| rs4911252  | 20 | 30793776 | G | 0.01064 |
| rs2424895  | 20 | 30799639 | T | 0.01194 |
| rs6087449  | 20 | 31184291 | T | 0.00949 |
| rs6141903  | 20 | 31313082 | G | 0.01240 |
| rs6088174  | 20 | 31368333 | G | 0.00317 |
| rs4911146  | 20 | 32103708 | C | 0.01269 |
| rs6087625  | 20 | 32806138 | A | 0.00012 |
| rs6119536  | 20 | 32913702 | G | 0.00752 |
| rs1624888  | 20 | 35182308 | G | 0.01644 |
| rs2076398  | 20 | 35261096 | T | 0.00271 |
| rs2272950  | 20 | 35271786 | A | 0.00653 |
| rs6020113  | 20 | 35736459 | G | 0.01612 |
| rs16986890 | 20 | 35759937 | A | 0.00441 |
| rs6020846  | 20 | 35839081 | T | 0.00793 |
| rs4809876  | 20 | 35936758 | G | 0.01230 |
| rs6092006  | 20 | 36242583 | A | 0.01256 |
| rs1474669  | 20 | 36250565 | T | 0.00360 |
| rs877600   | 20 | 36296454 | C | 0.00265 |
| rs6064334  | 20 | 36353805 | G | 0.00662 |
| rs4287822  | 20 | 36354924 | A | 0.01016 |
| rs6100336  | 20 | 36652968 | A | 0.00572 |
| rs2179318  | 20 | 37060677 | C | 0.01556 |
| rs6028332  | 20 | 37270725 | A | 0.01508 |
| rs6124140  | 20 | 37396596 | T | 0.01095 |
| rs805944   | 20 | 37695132 | G | 0.00833 |
| rs211883   | 20 | 37845109 | T | 0.01627 |
| rs6065202  | 20 | 38144694 | T | 0.01041 |
| rs6101972  | 20 | 38470085 | T | 0.00584 |
| rs2207131  | 20 | 38580350 | G | 0.01527 |
| rs6102017  | 20 | 38588283 | C | 0.01325 |



|            |    |          |   |         |
|------------|----|----------|---|---------|
| rs11908206 | 20 | 38600118 | T | 0.01651 |
| rs6029178  | 20 | 38611971 | G | 0.01405 |
| rs17820549 | 20 | 38656901 | A | 0.00398 |
| rs761370   | 20 | 38735071 | T | 0.00029 |
| rs6029669  | 20 | 39480359 | C | 0.01639 |
| rs6093496  | 20 | 39629468 | G | 0.00303 |
| rs7263463  | 20 | 39677351 | C | 0.00408 |
| rs1883377  | 20 | 40234897 | A | 0.00486 |
| rs6093598  | 20 | 40291139 | C | 0.01461 |
| rs6030070  | 20 | 40292402 | T | 0.01396 |
| rs6030071  | 20 | 40292464 | C | 0.00498 |
| rs1014757  | 20 | 40295037 | C | 0.00173 |
| rs6030076  | 20 | 40296596 | A | 0.00429 |
| rs6072667  | 20 | 40302467 | C | 0.01246 |
| rs6030096  | 20 | 40321219 | A | 0.00379 |
| rs6030124  | 20 | 40371421 | G | 0.00753 |
| rs6072747  | 20 | 40505433 | A | 0.00336 |
| rs6016798  | 20 | 40508810 | T | 0.01480 |
| rs6030274  | 20 | 40551509 | T | 0.01256 |
| rs6030456  | 20 | 40808754 | C | 0.00771 |
| rs208229   | 20 | 40895007 | C | 0.00722 |
| rs4812665  | 20 | 41046640 | T | 0.00705 |
| rs12481496 | 20 | 41071512 | G | 0.00152 |
| rs9679833  | 20 | 41123994 | A | 0.00012 |
| rs6030780  | 20 | 41381185 | A | 0.00450 |
| rs6031097  | 20 | 41840942 | C | 0.00503 |
| rs1536918  | 20 | 41842957 | G | 0.01512 |
| rs6031165  | 20 | 41904898 | T | 0.01446 |
| rs3746566  | 20 | 41956979 | G | 0.01313 |
| rs743152   | 20 | 42003325 | C | 0.01290 |
| rs6073269  | 20 | 42042971 | G | 0.01441 |
| rs6017252  | 20 | 42112605 | T | 0.01512 |
| rs6065705  | 20 | 42174528 | A | 0.00919 |
| rs16988852 | 20 | 42275043 | T | 0.00902 |
| rs2071199  | 20 | 42464280 | A | 0.00439 |
| rs2057242  | 20 | 42845911 | C | 0.00073 |
| rs41348454 | 20 | 43253309 | A | 0.00528 |
| rs6073746  | 20 | 43528383 | A | 0.00672 |
| rs6073846  | 20 | 43729737 | G | 0.00260 |
| rs11906879 | 20 | 44024731 | T | 0.00093 |
| rs16985435 | 20 | 44101338 | T | 0.01062 |
| rs4813003  | 20 | 44196691 | T | 0.01622 |
| rs998422   | 20 | 44792815 | A | 6.84500 |
| rs11699667 | 20 | 44801171 | G | 0.01476 |

|            |    |          |   |          |
|------------|----|----------|---|----------|
| rs6094514  | 20 | 44997127 | G | 0.00826  |
| rs17488678 | 20 | 45010891 | T | 0.00705  |
| rs6063063  | 20 | 45098501 | T | 0.00994  |
| rs4810702  | 20 | 45871482 | C | 0.00849  |
| rs11699291 | 20 | 46330350 | A | 0.00655  |
| rs6095069  | 20 | 46398849 | G | 0.00006  |
| rs761270   | 20 | 46712008 | G | 0.00464  |
| rs6122713  | 20 | 46728448 | G | 0.01442  |
| rs11697517 | 20 | 47843179 | G | 0.01134  |
| rs11086294 | 20 | 47844836 | A | 0.01304  |
| rs6012881  | 20 | 48277772 | A | 0.01381  |
| rs230002   | 20 | 49166025 | G | 0.00271  |
| rs2426299  | 20 | 49451402 | T | 0.00948  |
| rs6067758  | 20 | 49457455 | A | 0.01132  |
| rs747062   | 20 | 49535539 | C | 0.00310  |
| rs1546920  | 20 | 49634189 | C | 0.01438  |
| rs1048878  | 20 | 49646660 | A | 0.00940  |
| rs6123073  | 20 | 49771095 | T | 0.00810  |
| rs2426403  | 20 | 49791124 | A | 0.01083  |
| rs6021427  | 20 | 49819497 | A | 0.00713  |
| rs6021453  | 20 | 49854755 | C | 0.00155  |
| rs6021460  | 20 | 49860267 | A | 0.01394  |
| rs6063719  | 20 | 49873461 | G | 0.00353  |
| rs6021501  | 20 | 49902951 | A | 0.01339  |
| rs17730415 | 20 | 49971215 | G | 0.00317  |
| rs6096889  | 20 | 50391244 | G | 0.00151  |
| rs6022002  | 20 | 50669622 | A | 0.00018  |
| rs861332   | 20 | 50697689 | A | 0.01610  |
| rs6123232  | 20 | 51003913 | G | 0.00472  |
| rs6022221  | 20 | 51072917 | C | 0.01578  |
| rs1467428  | 20 | 51106390 | T | 0.00047  |
| rs6091633  | 20 | 51139407 | A | 10.36700 |
| rs6013646  | 20 | 51248380 | A | 0.00417  |
| rs6126919  | 20 | 51733766 | C | 0.01619  |
| rs2041317  | 20 | 51797014 | C | 0.01329  |
| rs6022811  | 20 | 51912882 | T | 0.00141  |
| rs210068   | 20 | 52159698 | T | 0.00193  |
| rs455731   | 20 | 52870424 | G | 0.01341  |
| rs6098293  | 20 | 52908663 | G | 0.01499  |
| rs159094   | 20 | 53068550 | T | 10.78700 |
| rs6023981  | 20 | 53301625 | G | 0.01049  |
| rs2206897  | 20 | 53363883 | T | 0.01124  |
| rs214388   | 20 | 53519449 | T | 0.00870  |
| rs584635   | 20 | 53671210 | T | 0.00654  |

|            |    |          |   |         |
|------------|----|----------|---|---------|
| rs1550194  | 20 | 53964926 | A | 0.00943 |
| rs6014619  | 20 | 54179544 | C | 0.01004 |
| rs6123569  | 20 | 54261178 | A | 0.00161 |
| rs6014688  | 20 | 54336197 | A | 0.00279 |
| rs6024830  | 20 | 54371614 | T | 0.01289 |
| rs6099129  | 20 | 54402046 | A | 0.00936 |
| rs3975198  | 20 | 54831523 | T | 0.01627 |
| rs4811769  | 20 | 54878364 | C | 0.00325 |
| rs1276367  | 20 | 55028093 | G | 0.00098 |
| rs11697631 | 20 | 55141325 | C | 0.00131 |
| rs6070068  | 20 | 55352684 | C | 0.01638 |
| rs6025742  | 20 | 55732097 | G | 0.01580 |
| rs6025822  | 20 | 55848540 | G | 0.01076 |
| rs6026060  | 20 | 56128988 | C | 0.00545 |
| rs6026122  | 20 | 56202490 | G | 0.01645 |
| rs514706   | 20 | 56249284 | T | 0.00492 |
| rs1980576  | 20 | 56479073 | A | 0.01000 |
| rs1977137  | 20 | 56636409 | G | 6.55000 |
| rs6026415  | 20 | 56637435 | A | 0.01028 |
| rs1569823  | 20 | 56639242 | C | 0.01103 |
| rs4812034  | 20 | 56830961 | G | 0.01017 |
| rs7267048  | 20 | 57567610 | T | 0.01147 |
| rs2426791  | 20 | 57595448 | C | 0.01428 |
| rs1040797  | 20 | 57703423 | A | 0.01538 |
| rs1416390  | 20 | 57717865 | G | 0.01303 |
| rs6027337  | 20 | 58145873 | C | 0.00210 |
| rs2865790  | 20 | 58158914 | G | 0.00654 |
| rs1535028  | 20 | 58247823 | A | 0.00485 |
| rs4305329  | 20 | 58363322 | T | 0.00002 |
| rs17199686 | 20 | 58441057 | A | 0.01656 |
| rs1201888  | 20 | 58690252 | A | 0.01372 |
| rs1201904  | 20 | 58706127 | G | 0.00858 |
| rs1201987  | 20 | 58736287 | A | 0.00750 |
| rs1201998  | 20 | 58740471 | A | 0.01452 |
| rs1202001  | 20 | 58740936 | G | 0.01611 |
| rs1202016  | 20 | 58743888 | C | 0.01441 |
| rs1202030  | 20 | 58748486 | G | 0.01459 |
| rs1202031  | 20 | 58748522 | T | 0.01615 |
| rs2096400  | 20 | 58777455 | C | 0.00361 |
| rs6124038  | 20 | 58957572 | C | 0.01220 |
| rs6129015  | 20 | 59046308 | T | 0.00133 |
| rs4812258  | 20 | 59064296 | C | 0.00394 |
| rs2093154  | 20 | 59071337 | A | 0.00370 |
| rs17732362 | 20 | 59118539 | G | 0.00027 |

|            |    |          |   |         |
|------------|----|----------|---|---------|
| rs6089247  | 20 | 59402927 | A | 0.00438 |
| rs1891775  | 20 | 59592913 | C | 0.00240 |
| rs6121726  | 20 | 59617642 | G | 0.01188 |
| rs6089810  | 20 | 61001027 | A | 0.01001 |
| rs6011456  | 20 | 61001169 | G | 0.01327 |
| rs6010784  | 20 | 61010764 | C | 0.01127 |
| rs4809436  | 20 | 61021955 | T | 0.00161 |
| rs816943   | 20 | 62146453 | A | 0.01178 |
| rs2822577  | 21 | 14627425 | G | 0.00083 |
| rs2049858  | 21 | 14807145 | G | 0.01207 |
| rs1556280  | 21 | 14807690 | A | 0.00338 |
| rs2822998  | 21 | 15285230 | C | 0.00900 |
| rs2823053  | 21 | 15387020 | G | 0.00245 |
| rs2823119  | 21 | 15469515 | C | 0.01002 |
| rs2823231  | 21 | 15608409 | C | 0.01248 |
| rs1297268  | 21 | 15740038 | G | 0.00192 |
| rs2037994  | 21 | 15880541 | C | 0.00607 |
| rs2297248  | 21 | 16125656 | A | 0.00135 |
| rs2823507  | 21 | 16147899 | G | 0.01385 |
| rs11911879 | 21 | 16248572 | G | 0.00305 |
| rs2823607  | 21 | 16378484 | G | 0.00517 |
| rs2823626  | 21 | 16470310 | T | 0.00996 |
| rs2823736  | 21 | 16580133 | G | 0.00893 |
| rs2824057  | 21 | 17099043 | C | 0.00156 |
| rs2824082  | 21 | 17135016 | T | 0.00238 |
| rs11701807 | 21 | 17230025 | C | 0.00257 |
| rs2824160  | 21 | 17287224 | T | 0.00891 |
| rs2824201  | 21 | 17346621 | G | 0.01434 |
| rs7276331  | 21 | 18209236 | C | 0.01465 |
| rs2824545  | 21 | 18210063 | A | 0.00034 |
| rs2824549  | 21 | 18212104 | T | 0.01073 |
| rs2824550  | 21 | 18212130 | T | 0.01324 |
| rs2824571  | 21 | 18237813 | T | 0.01644 |
| rs12626848 | 21 | 18246644 | T | 0.01449 |
| rs962868   | 21 | 18254668 | A | 0.01436 |
| rs17698445 | 21 | 18573228 | G | 0.00181 |
| rs2824852  | 21 | 18786933 | C | 0.00457 |
| rs2210230  | 21 | 18849904 | C | 0.01081 |
| rs1740142  | 21 | 18853412 | C | 0.00323 |
| rs2824918  | 21 | 18878732 | A | 0.01045 |
| rs1735798  | 21 | 18878920 | T | 0.01375 |
| rs2824946  | 21 | 18896937 | G | 0.00974 |
| rs2824957  | 21 | 18914694 | A | 0.00157 |
| rs1537075  | 21 | 19330009 | A | 0.00288 |

|            |    |          |   |         |
|------------|----|----------|---|---------|
| rs2406882  | 21 | 19359568 | G | 0.00521 |
| rs2051365  | 21 | 19483092 | T | 0.00168 |
| rs2825446  | 21 | 19551215 | G | 0.00539 |
| rs2825545  | 21 | 19664061 | T | 0.00830 |
| rs2826077  | 21 | 20490584 | G | 0.00190 |
| rs2407647  | 21 | 20631007 | T | 0.00695 |
| rs1482415  | 21 | 20978977 | A | 0.00537 |
| rs463419   | 21 | 21050970 | C | 0.00797 |
| rs2826509  | 21 | 21067008 | T | 0.00737 |
| rs9983966  | 21 | 21138990 | G | 0.01018 |
| rs8131899  | 21 | 21317961 | T | 0.01576 |
| rs9983588  | 21 | 21318244 | T | 0.00795 |
| rs8128372  | 21 | 21349346 | A | 0.00626 |
| rs7278655  | 21 | 21863305 | G | 0.00307 |
| rs41499345 | 21 | 21873271 | G | 0.01033 |
| rs2827061  | 21 | 22108903 | G | 0.01157 |
| rs2827076  | 21 | 22118120 | T | 0.00020 |
| rs2827077  | 21 | 22118163 | C | 0.01410 |
| rs9306034  | 21 | 22127413 | A | 0.00546 |
| rs2827091  | 21 | 22142443 | G | 0.01272 |
| rs2827185  | 21 | 22280956 | A | 0.01599 |
| rs2827186  | 21 | 22281407 | C | 0.00125 |
| rs9976697  | 21 | 22361145 | A | 0.00355 |
| rs2827482  | 21 | 22698343 | C | 0.00334 |
| rs2827497  | 21 | 22704579 | C | 0.00829 |
| rs2827511  | 21 | 22709066 | A | 0.00699 |
| rs2026214  | 21 | 22710258 | C | 0.01335 |
| rs11911777 | 21 | 23126095 | A | 0.00383 |
| rs2827909  | 21 | 23442973 | A | 0.00372 |
| rs2827912  | 21 | 23443841 | G | 0.00780 |
| rs2827915  | 21 | 23444664 | G | 0.01295 |
| rs200710   | 21 | 23735278 | G | 0.01458 |
| rs2828183  | 21 | 23761888 | A | 0.00571 |
| rs2828400  | 21 | 23962554 | A | 0.01404 |
| rs41508448 | 21 | 24021053 | A | 0.00172 |
| rs2000488  | 21 | 24588085 | C | 0.01475 |
| rs2186438  | 21 | 24792561 | G | 0.00213 |
| rs2860156  | 21 | 24894439 | C | 0.00472 |
| rs9753823  | 21 | 25145535 | A | 0.01402 |
| rs6516671  | 21 | 25727997 | G | 0.01487 |
| rs2829769  | 21 | 25759286 | A | 0.00215 |
| rs4816263  | 21 | 26131381 | C | 0.00987 |
| rs1505455  | 21 | 26134691 | C | 0.01089 |
| rs11087985 | 21 | 26260130 | C | 0.00920 |

|            |    |          |   |         |
|------------|----|----------|---|---------|
| rs8132767  | 21 | 26610103 | G | 0.01566 |
| rs9974283  | 21 | 26713128 | T | 0.00861 |
| rs2409192  | 21 | 27030745 | A | 0.00331 |
| rs17560766 | 21 | 27049363 | G | 0.00871 |
| rs229060   | 21 | 27206861 | A | 0.01240 |
| rs9977138  | 21 | 27948923 | G | 0.01242 |
| rs1888433  | 21 | 27954964 | G | 0.00846 |
| rs243741   | 21 | 28015624 | T | 0.00660 |
| rs2831138  | 21 | 28021938 | T | 0.00559 |
| rs2409292  | 21 | 28352843 | A | 0.00350 |
| rs16982350 | 21 | 28699240 | C | 0.00600 |
| rs2831921  | 21 | 28884481 | G | 0.00207 |
| rs2026242  | 21 | 29161798 | G | 0.01520 |
| rs1048546  | 21 | 29166748 | T | 0.01066 |
| rs2254638  | 21 | 29178154 | A | 0.01462 |
| rs2248501  | 21 | 29198282 | A | 0.00867 |
| rs2832137  | 21 | 29201887 | A | 0.01207 |
| rs2832147  | 21 | 29266813 | A | 0.00284 |
| rs8129616  | 21 | 29441956 | T | 0.00678 |
| rs8132759  | 21 | 29512822 | T | 0.00584 |
| rs1029224  | 21 | 29932927 | T | 0.00485 |
| rs2249140  | 21 | 29939211 | A | 0.00669 |
| rs11088125 | 21 | 29945889 | G | 0.00249 |
| rs363515   | 21 | 29964388 | C | 0.00110 |
| rs459617   | 21 | 30062624 | T | 0.01472 |
| rs455804   | 21 | 30068040 | G | 0.00944 |
| rs932250   | 21 | 30073388 | A | 0.00145 |
| rs1789237  | 21 | 30353978 | C | 0.00724 |
| rs554895   | 21 | 30507226 | T | 0.00760 |
| rs2833336  | 21 | 31503585 | G | 0.01184 |
| rs1977904  | 21 | 31589767 | G | 0.00025 |
| rs2284502  | 21 | 31669620 | G | 0.01279 |
| rs2833405  | 21 | 31716506 | C | 0.01183 |
| rs8133912  | 21 | 31766283 | G | 0.01445 |
| rs1892857  | 21 | 31778042 | A | 0.00884 |
| rs2833653  | 21 | 32393390 | G | 0.01565 |
| rs2833864  | 21 | 32810264 | C | 0.01469 |
| rs2833878  | 21 | 32840941 | A | 0.00417 |
| rs2833980  | 21 | 33145158 | C | 0.00527 |
| rs2834073  | 21 | 33333415 | A | 0.00398 |
| rs9305554  | 21 | 34900941 | C | 0.01521 |
| rs2246640  | 21 | 35040142 | A | 0.01115 |
| rs2834626  | 21 | 35045042 | T | 0.00230 |
| rs2834639  | 21 | 35097947 | T | 0.00447 |

|            |    |          |   |         |
|------------|----|----------|---|---------|
| rs2834643  | 21 | 35108266 | G | 0.01126 |
| rs13047845 | 21 | 35156070 | T | 0.01524 |
| rs41360844 | 21 | 35403341 | G | 0.01168 |
| rs12152004 | 21 | 35633660 | C | 0.00326 |
| rs2834941  | 21 | 35763116 | G | 0.01108 |
| rs2834965  | 21 | 35844297 | A | 0.00566 |
| rs2834997  | 21 | 35860466 | A | 0.01124 |
| rs2049798  | 21 | 35870442 | A | 0.01340 |
| rs7281993  | 21 | 35994009 | G | 0.00931 |
| rs1159089  | 21 | 36209667 | T | 0.00891 |
| rs7282281  | 21 | 36304348 | A | 0.01358 |
| rs2243723  | 21 | 36493463 | G | 0.00195 |
| rs8134233  | 21 | 36740941 | G | 0.01187 |
| rs2249115  | 21 | 36771109 | T | 0.00248 |
| rs8133274  | 21 | 37369254 | A | 0.00686 |
| rs717859   | 21 | 37934672 | G | 0.00329 |
| rs2835850  | 21 | 37934847 | A | 0.00680 |
| rs2836431  | 21 | 38771787 | A | 0.00112 |
| rs2836527  | 21 | 38869617 | A | 0.00521 |
| rs466939   | 21 | 38915636 | C | 0.00774 |
| rs2836657  | 21 | 39041638 | A | 0.00101 |
| rs11254    | 21 | 39118258 | G | 0.00301 |
| rs2000639  | 21 | 39202392 | C | 0.00125 |
| rs2836870  | 21 | 39368554 | A | 0.01045 |
| rs2063969  | 21 | 39411945 | C | 0.00860 |
| rs7281540  | 21 | 39497183 | C | 0.00665 |
| rs2150414  | 21 | 39536858 | G | 0.01523 |
| rs7275773  | 21 | 39567960 | T | 0.01316 |
| rs1984748  | 21 | 39591768 | C | 0.00867 |
| rs8131150  | 21 | 39599185 | G | 8.60200 |
| rs2836993  | 21 | 39658343 | A | 0.00594 |
| rs12627448 | 21 | 39826812 | A | 0.00159 |
| rs551558   | 21 | 39843109 | T | 0.00278 |
| rs591457   | 21 | 39853205 | C | 0.00420 |
| rs2837193  | 21 | 40063722 | G | 0.01287 |
| rs16998521 | 21 | 40087288 | T | 0.00297 |
| rs381716   | 21 | 40157622 | G | 0.01610 |
| rs16998864 | 21 | 40196193 | A | 0.00216 |
| rs2837291  | 21 | 40207884 | G | 0.01540 |
| rs2010513  | 21 | 40297194 | C | 0.00733 |
| rs2837440  | 21 | 40421912 | G | 0.01256 |
| rs2837472  | 21 | 40456382 | A | 0.01178 |
| rs2837512  | 21 | 40514545 | T | 0.00523 |
| rs444584   | 21 | 40517596 | C | 0.01114 |

|            |    |          |   |         |
|------------|----|----------|---|---------|
| rs376508   | 21 | 40518055 | G | 0.00792 |
| rs447940   | 21 | 40518170 | C | 0.01150 |
| rs435386   | 21 | 40520243 | A | 0.00368 |
| rs1882758  | 21 | 40532666 | C | 0.01103 |
| rs4818122  | 21 | 40543968 | A | 0.01153 |
| rs2837534  | 21 | 40544164 | C | 0.00771 |
| rs2222979  | 21 | 40545039 | A | 0.00600 |
| rs2837756  | 21 | 40917744 | A | 0.01367 |
| rs9984187  | 21 | 41067495 | C | 0.01322 |
| rs2837884  | 21 | 41231130 | A | 0.01494 |
| rs2837961  | 21 | 41440469 | A | 0.00865 |
| rs2838008  | 21 | 41606914 | A | 0.01377 |
| rs9985079  | 21 | 41609006 | G | 0.00193 |
| rs9984523  | 21 | 41805901 | A | 0.00954 |
| rs8134657  | 21 | 41815778 | T | 0.01547 |
| rs2247788  | 21 | 41940314 | C | 0.01536 |
| rs11203155 | 21 | 42043210 | C | 0.01491 |
| rs11702415 | 21 | 42270454 | T | 0.00384 |
| rs928874   | 21 | 42295594 | T | 0.00871 |
| rs220120   | 21 | 42402584 | C | 0.01283 |
| rs2839570  | 21 | 42974196 | T | 0.00781 |
| rs4920037  | 21 | 43354960 | T | 0.00041 |
| rs229347   | 21 | 43672498 | G | 0.01485 |
| rs2838325  | 21 | 43838712 | A | 0.00665 |
| rs2838334  | 21 | 43889389 | G | 0.00772 |
| rs762400   | 21 | 43938057 | C | 0.01345 |
| rs4818873  | 21 | 44193313 | T | 0.00821 |
| rs11088961 | 21 | 44985089 | A | 0.01416 |
| rs2838806  | 21 | 45443029 | T | 0.01337 |
| rs7282214  | 21 | 45876985 | G | 0.00530 |
| rs877746   | 21 | 46434159 | G | 0.01356 |
| rs2254524  | 21 | 46438897 | C | 0.00489 |
| rs1544504  | 22 | 16050256 | A | 0.01475 |
| rs9617982  | 22 | 16172740 | T | 0.00595 |
| rs2078734  | 22 | 16281683 | A | 0.00081 |
| rs4819596  | 22 | 16370606 | C | 0.01191 |
| rs5747306  | 22 | 16508960 | C | 0.00909 |
| rs2401163  | 22 | 16511078 | C | 0.00834 |
| rs2587081  | 22 | 16563623 | C | 0.01546 |
| rs11538    | 22 | 16600831 | G | 0.01592 |
| rs5992861  | 22 | 16687634 | A | 0.01255 |
| rs5992871  | 22 | 16690110 | A | 0.01316 |
| rs2073738  | 22 | 17550956 | T | 0.00637 |
| rs1985884  | 22 | 18023245 | T | 0.00487 |



|            |    |          |   |         |
|------------|----|----------|---|---------|
| rs4819519  | 22 | 18116003 | A | 0.01216 |
| rs887200   | 22 | 18343666 | G | 0.01037 |
| rs412050   | 22 | 20637519 | C | 0.01522 |
| rs9612272  | 22 | 21944026 | A | 0.00864 |
| rs5759867  | 22 | 22185522 | T | 0.00976 |
| rs6004064  | 22 | 22848728 | G | 0.00576 |
| rs8139439  | 22 | 22862142 | C | 0.00608 |
| rs2267062  | 22 | 22874482 | G | 0.00183 |
| rs5760687  | 22 | 23547890 | T | 0.00494 |
| rs139756   | 22 | 23635370 | T | 0.00728 |
| rs5760748  | 22 | 23664977 | C | 0.00404 |
| rs9624915  | 22 | 24563343 | A | 0.01657 |
| rs4822663  | 22 | 24564918 | C | 0.01646 |
| rs5752242  | 22 | 24634057 | A | 0.00314 |
| rs13057714 | 22 | 24692534 | A | 0.00266 |
| rs916425   | 22 | 24718337 | C | 0.01529 |
| rs9613067  | 22 | 24718548 | T | 0.01373 |
| rs9613081  | 22 | 24734101 | C | 0.00006 |
| rs5997020  | 22 | 24735073 | C | 0.00732 |
| rs16981767 | 22 | 25058967 | G | 0.00519 |
| rs1000815  | 22 | 25161077 | G | 0.00321 |
| rs136543   | 22 | 25580786 | A | 0.00626 |
| rs11090463 | 22 | 25707569 | T | 0.01151 |
| rs4820729  | 22 | 25780510 | T | 0.01637 |
| rs542981   | 22 | 26009808 | T | 0.00824 |
| rs713743   | 22 | 26018335 | A | 0.00830 |
| rs16984323 | 22 | 26065575 | T | 0.00851 |
| rs136950   | 22 | 26138186 | A | 0.00809 |
| rs9625252  | 22 | 26240138 | T | 0.01167 |
| rs9625253  | 22 | 26242970 | C | 0.01662 |
| rs8140987  | 22 | 26253399 | C | 0.00167 |
| rs1884291  | 22 | 26293416 | T | 0.00337 |
| rs134028   | 22 | 26378449 | C | 0.00324 |
| rs16985967 | 22 | 26817192 | T | 0.00640 |
| rs760627   | 22 | 27789634 | A | 0.00340 |
| rs760628   | 22 | 27789732 | C | 0.00449 |
| rs134661   | 22 | 27821706 | C | 0.00677 |
| rs2267145  | 22 | 28135407 | T | 0.01309 |
| rs2530678  | 22 | 28411715 | T | 0.01419 |
| rs41479445 | 22 | 28761242 | T | 0.00898 |
| rs8141656  | 22 | 29070148 | C | 0.00269 |
| rs737942   | 22 | 29206835 | G | 0.00789 |
| rs5753336  | 22 | 29557373 | C | 0.01240 |
| rs5749237  | 22 | 29948958 | C | 0.00506 |

|            |    |          |   |          |
|------------|----|----------|---|----------|
| rs10483160 | 22 | 30407247 | A | 0.01230  |
| rs17683310 | 22 | 30807445 | A | 0.01318  |
| rs5753966  | 22 | 31045559 | T | 9.68700  |
| rs1109364  | 22 | 31186594 | A | 0.00251  |
| rs3213515  | 22 | 31234927 | G | 0.00331  |
| rs9621545  | 22 | 31451988 | G | 0.01153  |
| rs4821103  | 22 | 31502612 | T | 0.01407  |
| rs137547   | 22 | 31641455 | C | 0.01277  |
| rs12484058 | 22 | 31760898 | G | 0.01638  |
| rs743793   | 22 | 31891746 | A | 0.00243  |
| rs130250   | 22 | 32038680 | T | 0.00321  |
| rs1004811  | 22 | 32139429 | G | 0.01129  |
| rs8138344  | 22 | 32150256 | C | 0.00500  |
| rs5998941  | 22 | 32158996 | C | 0.01071  |
| rs239330   | 22 | 32465007 | G | 0.00989  |
| rs4821197  | 22 | 32655300 | G | 0.00698  |
| rs5754821  | 22 | 32803145 | T | 0.00035  |
| rs5999208  | 22 | 32842123 | T | 0.01035  |
| rs387332   | 22 | 32880905 | A | 0.00679  |
| rs1003935  | 22 | 32955711 | G | 0.00272  |
| rs11089671 | 22 | 33160603 | C | 0.01235  |
| rs4423     | 22 | 33199196 | G | 0.00360  |
| rs1012604  | 22 | 33522006 | A | 0.01195  |
| rs5755575  | 22 | 33821969 | G | 0.00663  |
| rs1573763  | 22 | 33850076 | A | 0.01456  |
| rs5750093  | 22 | 34014533 | C | 0.01420  |
| rs470109   | 22 | 34249783 | A | 0.00820  |
| rs5995222  | 22 | 34846890 | T | 0.00513  |
| rs1476029  | 22 | 34847878 | A | 16.82700 |
| rs5756080  | 22 | 34857913 | G | 0.01140  |
| rs132644   | 22 | 34875772 | A | 0.01648  |
| rs132645   | 22 | 34878352 | G | 0.01652  |
| rs132648   | 22 | 34882348 | A | 0.01581  |
| rs4821460  | 22 | 34885418 | C | 0.01643  |
| rs6519032  | 22 | 35439255 | G | 0.00580  |
| rs2284033  | 22 | 35863980 | G | 0.00002  |
| rs727047   | 22 | 36007665 | G | 0.00146  |
| rs12167035 | 22 | 36307228 | T | 0.00557  |
| rs5750547  | 22 | 36876646 | A | 0.01533  |
| rs6001118  | 22 | 37126964 | A | 0.00870  |
| rs5757312  | 22 | 37585537 | G | 0.00357  |
| rs126228   | 22 | 38011382 | G | 0.01133  |
| rs137960   | 22 | 38631426 | A | 0.00372  |
| rs4822050  | 22 | 40507399 | C | 0.00348  |

|            |    |          |   |         |
|------------|----|----------|---|---------|
| rs8141783  | 22 | 40509057 | A | 0.00228 |
| rs9620000  | 22 | 40626649 | G | 0.01537 |
| rs4820483  | 22 | 41518124 | T | 0.00475 |
| rs5758965  | 22 | 41556543 | T | 0.00288 |
| rs12166809 | 22 | 41617234 | T | 0.00518 |
| rs4820494  | 22 | 41635805 | C | 0.00340 |
| rs9607982  | 22 | 41652158 | T | 0.00260 |
| rs1071960  | 22 | 41679576 | C | 0.01087 |
| rs2072883  | 22 | 41765612 | C | 0.00358 |
| rs1883264  | 22 | 41839790 | G | 0.01600 |
| rs4988406  | 22 | 41848268 | G | 0.00081 |
| rs11574528 | 22 | 41857625 | A | 0.01570 |
| rs12158070 | 22 | 41923533 | T | 0.00055 |
| rs135058   | 22 | 42168027 | T | 0.01312 |
| rs4823107  | 22 | 42712556 | G | 0.01547 |
| rs16991341 | 22 | 42740509 | T | 0.00472 |
| rs761165   | 22 | 42845162 | T | 0.01447 |
| rs738485   | 22 | 42859468 | T | 0.00733 |
| rs2267617  | 22 | 42870021 | T | 0.01086 |
| rs470003   | 22 | 43233894 | C | 0.00403 |
| rs3213550  | 22 | 43512004 | T | 0.01629 |
| rs131989   | 22 | 43785782 | G | 0.01449 |
| rs132017   | 22 | 43803024 | A | 0.01296 |
| rs140570   | 22 | 43824995 | C | 0.00587 |
| rs5766378  | 22 | 43828179 | T | 0.01505 |
| rs4416     | 22 | 44350681 | G | 0.00143 |
| rs138151   | 22 | 44484981 | C | 0.00792 |
| rs9626891  | 22 | 44861612 | G | 0.01587 |
| rs12330015 | 22 | 44968942 | C | 0.00859 |
| rs7292762  | 22 | 45246945 | G | 0.01079 |
| rs6008939  | 22 | 45416745 | C | 0.01080 |
| rs5769346  | 22 | 45839347 | C | 0.00699 |
| rs5767489  | 22 | 45879447 | A | 0.01234 |
| rs136646   | 22 | 46043258 | A | 0.01647 |
| rs80454    | 22 | 46043490 | A | 0.01666 |
| rs4823640  | 22 | 46184860 | C | 0.00435 |
| rs6008214  | 22 | 46223455 | C | 0.00676 |
| rs11090798 | 22 | 46649430 | G | 0.00316 |
| rs6008438  | 22 | 46658741 | T | 0.00484 |
| rs8137558  | 22 | 46989892 | C | 0.00703 |
| rs9615801  | 22 | 46990410 | G | 0.01613 |
| rs9615287  | 22 | 46990520 | G | 0.01235 |
| rs7287281  | 22 | 46997362 | C | 0.00813 |
| rs133666   | 22 | 47105923 | G | 0.01125 |

|            |    |          |   |         |
|------------|----|----------|---|---------|
| rs16999333 | 22 | 47304733 | C | 0.00525 |
| rs6009160  | 22 | 47868868 | G | 0.00853 |
| rs9616423  | 22 | 47872695 | G | 0.00562 |
| rs7288663  | 22 | 48054141 | C | 0.01516 |
| rs860236   | 22 | 48118077 | T | 0.01515 |
| rs5769604  | 22 | 48161155 | A | 0.00418 |
| rs135853   | 22 | 48364457 | T | 0.01101 |
| rs5771077  | 22 | 48906662 | G | 0.01520 |

**Table S4:** Linkage disequilibrium ( $r^2$  values  $> 0.2$ ) among pairs of SNPs used to generate v1.0 quit success scores. These values come from PLINK, v 1.07 tests of SNPs that are not more than 10 SNPs apart within a 1Mb sliding window, and provides  $r^2$  correlations based on genotypic allele counts between variables, coded 0, 1 or 2 to represent the number of non-reference alleles at each.

| chr | bp (SNP A) | SNP A      | bp (SNP B) | SNP B      | $r^2$ |
|-----|------------|------------|------------|------------|-------|
| 1   | 4358909    | rs12042555 | 4360565    | rs1870506  | 0.587 |
| 1   | 5398168    | rs11576458 | 5398185    | rs11576460 | 0.812 |
| 1   | 5640603    | rs1695629  | 5641161    | rs1695628  | 0.820 |
| 1   | 9304621    | rs1294055  | 9304872    | rs564709   | 0.527 |
| 1   | 9304872    | rs564709   | 9950127    | rs2890358  | 0.238 |
| 1   | 10549509   | rs11121594 | 10555860   | rs6687502  | 0.990 |
| 1   | 14361606   | rs7545744  | 14367357   | rs6692603  | 0.766 |
| 1   | 14361606   | rs7545744  | 14367590   | rs10489144 | 0.512 |
| 1   | 14361606   | rs7545744  | 14368482   | rs10489143 | 0.512 |
| 1   | 14367357   | rs6692603  | 14367590   | rs10489144 | 0.705 |
| 1   | 14367357   | rs6692603  | 14368482   | rs10489143 | 0.705 |
| 1   | 14367590   | rs10489144 | 14368482   | rs10489143 | 1.000 |
| 1   | 14790404   | rs12145446 | 14793530   | rs2486778  | 0.924 |
| 1   | 15706947   | rs2020902  | 15773124   | rs6429753  | 0.333 |
| 1   | 15706947   | rs2020902  | 15841357   | rs6696286  | 0.221 |
| 1   | 15773124   | rs6429753  | 15841357   | rs6696286  | 0.534 |
| 1   | 15773124   | rs6429753  | 15878379   | rs12082523 | 0.543 |
| 1   | 15841357   | rs6696286  | 15878379   | rs12082523 | 0.551 |
| 1   | 17244342   | rs10887994 | 17247250   | rs7536679  | 1.000 |
| 1   | 17244342   | rs10887994 | 17247329   | rs7545518  | 1.000 |
| 1   | 17244342   | rs10887994 | 17273681   | rs2295053  | 0.398 |
| 1   | 17247250   | rs7536679  | 17247329   | rs7545518  | 1.000 |
| 1   | 17247250   | rs7536679  | 17273681   | rs2295053  | 0.401 |
| 1   | 17247329   | rs7545518  | 17273681   | rs2295053  | 0.413 |
| 1   | 20893785   | rs535696   | 20904570   | rs6702859  | 0.215 |
| 1   | 20893785   | rs535696   | 20906226   | rs875015   | 0.226 |
| 1   | 20893785   | rs535696   | 20907736   | rs6426645  | 0.347 |
| 1   | 20893785   | rs535696   | 20920203   | rs637990   | 0.234 |
| 1   | 20904570   | rs6702859  | 20906226   | rs875015   | 0.962 |
| 1   | 20904570   | rs6702859  | 20907736   | rs6426645  | 0.708 |
| 1   | 20904570   | rs6702859  | 20920203   | rs637990   | 0.473 |
| 1   | 20906226   | rs875015   | 20907736   | rs6426645  | 0.745 |
| 1   | 20906226   | rs875015   | 20920203   | rs637990   | 0.510 |
| 1   | 20906226   | rs875015   | 21228428   | rs6659152  | 0.225 |
| 1   | 20907736   | rs6426645  | 20920203   | rs637990   | 0.717 |
| 1   | 20907736   | rs6426645  | 20939588   | rs12123092 | 0.235 |
| 1   | 20907736   | rs6426645  | 20978603   | rs1021077  | 0.321 |

|   |          |            |          |            |       |
|---|----------|------------|----------|------------|-------|
| 1 | 20907736 | rs6426645  | 20987420 | rs3856173  | 0.307 |
| 1 | 20907736 | rs6426645  | 21107510 | rs4654887  | 0.290 |
| 1 | 20907736 | rs6426645  | 21171950 | rs6700718  | 0.291 |
| 1 | 20907736 | rs6426645  | 21228428 | rs6659152  | 0.400 |
| 1 | 20907736 | rs6426645  | 21264462 | rs1354792  | 0.261 |
| 1 | 20920203 | rs637990   | 20939588 | rs12123092 | 0.343 |
| 1 | 20920203 | rs637990   | 20978603 | rs1021077  | 0.504 |
| 1 | 20920203 | rs637990   | 20987420 | rs3856173  | 0.487 |
| 1 | 20920203 | rs637990   | 21029254 | rs4654874  | 0.278 |
| 1 | 20920203 | rs637990   | 21107510 | rs4654887  | 0.463 |
| 1 | 20920203 | rs637990   | 21171950 | rs6700718  | 0.454 |
| 1 | 20920203 | rs637990   | 21228428 | rs6659152  | 0.537 |
| 1 | 20920203 | rs637990   | 21264462 | rs1354792  | 0.386 |
| 1 | 20920203 | rs637990   | 21282818 | rs4654899  | 0.452 |
| 1 | 20939588 | rs12123092 | 20978603 | rs1021077  | 0.731 |
| 1 | 20939588 | rs12123092 | 20987420 | rs3856173  | 0.743 |
| 1 | 20939588 | rs12123092 | 21029254 | rs4654874  | 0.630 |
| 1 | 20939588 | rs12123092 | 21107510 | rs4654887  | 0.566 |
| 1 | 20939588 | rs12123092 | 21171950 | rs6700718  | 0.549 |
| 1 | 20939588 | rs12123092 | 21228428 | rs6659152  | 0.548 |
| 1 | 20939588 | rs12123092 | 21264462 | rs1354792  | 0.660 |
| 1 | 20939588 | rs12123092 | 21282818 | rs4654899  | 0.554 |
| 1 | 20939588 | rs12123092 | 21320522 | rs12402486 | 0.651 |
| 1 | 20978603 | rs1021077  | 20987420 | rs3856173  | 0.965 |
| 1 | 20978603 | rs1021077  | 21029254 | rs4654874  | 0.645 |
| 1 | 20978603 | rs1021077  | 21107510 | rs4654887  | 0.740 |
| 1 | 20978603 | rs1021077  | 21171950 | rs6700718  | 0.735 |
| 1 | 20978603 | rs1021077  | 21228428 | rs6659152  | 0.739 |
| 1 | 20978603 | rs1021077  | 21264462 | rs1354792  | 0.616 |
| 1 | 20978603 | rs1021077  | 21282818 | rs4654899  | 0.718 |
| 1 | 20978603 | rs1021077  | 21320522 | rs12402486 | 0.620 |
| 1 | 20978603 | rs1021077  | 21388493 | rs6702110  | 0.714 |
| 1 | 20987420 | rs3856173  | 21029254 | rs4654874  | 0.678 |
| 1 | 20987420 | rs3856173  | 21107510 | rs4654887  | 0.781 |
| 1 | 20987420 | rs3856173  | 21171950 | rs6700718  | 0.754 |
| 1 | 20987420 | rs3856173  | 21228428 | rs6659152  | 0.720 |
| 1 | 20987420 | rs3856173  | 21264462 | rs1354792  | 0.654 |
| 1 | 20987420 | rs3856173  | 21282818 | rs4654899  | 0.759 |
| 1 | 20987420 | rs3856173  | 21320522 | rs12402486 | 0.658 |
| 1 | 20987420 | rs3856173  | 21388493 | rs6702110  | 0.755 |
| 1 | 21029254 | rs4654874  | 21107510 | rs4654887  | 0.720 |
| 1 | 21029254 | rs4654874  | 21171950 | rs6700718  | 0.679 |
| 1 | 21029254 | rs4654874  | 21228428 | rs6659152  | 0.588 |
| 1 | 21029254 | rs4654874  | 21264462 | rs1354792  | 0.766 |

|   |          |            |          |            |       |
|---|----------|------------|----------|------------|-------|
| 1 | 21029254 | rs4654874  | 21282818 | rs4654899  | 0.697 |
| 1 | 21029254 | rs4654874  | 21320522 | rs12402486 | 0.774 |
| 1 | 21029254 | rs4654874  | 21388493 | rs6702110  | 0.688 |
| 1 | 21107510 | rs4654887  | 21171950 | rs6700718  | 0.957 |
| 1 | 21107510 | rs4654887  | 21228428 | rs6659152  | 0.855 |
| 1 | 21107510 | rs4654887  | 21264462 | rs1354792  | 0.855 |
| 1 | 21107510 | rs4654887  | 21282818 | rs4654899  | 0.974 |
| 1 | 21107510 | rs4654887  | 21320522 | rs12402486 | 0.861 |
| 1 | 21107510 | rs4654887  | 21388493 | rs6702110  | 0.974 |
| 1 | 21171950 | rs6700718  | 21228428 | rs6659152  | 0.901 |
| 1 | 21171950 | rs6700718  | 21264462 | rs1354792  | 0.860 |
| 1 | 21171950 | rs6700718  | 21282818 | rs4654899  | 0.983 |
| 1 | 21171950 | rs6700718  | 21320522 | rs12402486 | 0.867 |
| 1 | 21171950 | rs6700718  | 21388493 | rs6702110  | 0.982 |
| 1 | 21228428 | rs6659152  | 21264462 | rs1354792  | 0.781 |
| 1 | 21228428 | rs6659152  | 21282818 | rs4654899  | 0.883 |
| 1 | 21228428 | rs6659152  | 21320522 | rs12402486 | 0.786 |
| 1 | 21228428 | rs6659152  | 21388493 | rs6702110  | 0.881 |
| 1 | 21264462 | rs1354792  | 21282818 | rs4654899  | 0.883 |
| 1 | 21264462 | rs1354792  | 21320522 | rs12402486 | 0.991 |
| 1 | 21264462 | rs1354792  | 21388493 | rs6702110  | 0.874 |
| 1 | 21282818 | rs4654899  | 21320522 | rs12402486 | 0.890 |
| 1 | 21282818 | rs4654899  | 21388493 | rs6702110  | 1.000 |
| 1 | 21320522 | rs12402486 | 21388493 | rs6702110  | 0.880 |
| 1 | 22663042 | rs4233289  | 22716015 | rs209722   | 0.754 |
| 1 | 22709086 | rs3754010  | 22716015 | rs209722   | 0.270 |
| 1 | 24771040 | rs6424106  | 24774585 | rs6687818  | 0.663 |
| 1 | 24771040 | rs6424106  | 24790043 | rs9328948  | 0.461 |
| 1 | 24774585 | rs6687818  | 24790043 | rs9328948  | 0.322 |
| 1 | 24939035 | rs3131502  | 24948388 | rs1890449  | 0.792 |
| 1 | 28423035 | rs4908393  | 28436866 | rs9508     | 0.921 |
| 1 | 28423035 | rs4908393  | 28439195 | rs576550   | 0.854 |
| 1 | 28436866 | rs9508     | 28439195 | rs576550   | 0.922 |
| 1 | 30400206 | rs1321117  | 30435437 | rs976190   | 0.369 |
| 1 | 30400206 | rs1321117  | 30438106 | rs10915041 | 0.403 |
| 1 | 30435437 | rs976190   | 30438106 | rs10915041 | 0.709 |
| 1 | 30435437 | rs976190   | 30445358 | rs941518   | 0.517 |
| 1 | 30438106 | rs10915041 | 30445358 | rs941518   | 0.431 |
| 1 | 33732649 | rs9943259  | 33773922 | rs2641953  | 0.296 |
| 1 | 34464326 | rs12410640 | 34478745 | rs10914890 | 0.702 |
| 1 | 34478745 | rs10914890 | 34506613 | rs10799034 | 0.278 |
| 1 | 34478745 | rs10914890 | 34506764 | rs771396   | 0.277 |
| 1 | 34478745 | rs10914890 | 34508639 | rs7524118  | 0.271 |
| 1 | 34478745 | rs10914890 | 34510599 | rs1361670  | 0.294 |

|   |          |            |          |            |       |
|---|----------|------------|----------|------------|-------|
| 1 | 34478745 | rs10914890 | 34514192 | rs880017   | 0.283 |
| 1 | 34478745 | rs10914890 | 34514539 | rs6425886  | 0.291 |
| 1 | 34478745 | rs10914890 | 34514843 | rs979336   | 0.271 |
| 1 | 34478745 | rs10914890 | 34515663 | rs1342153  | 0.271 |
| 1 | 34478745 | rs10914890 | 34521341 | rs9661105  | 0.289 |
| 1 | 34506613 | rs10799034 | 34506764 | rs771396   | 0.943 |
| 1 | 34506613 | rs10799034 | 34508639 | rs7524118  | 0.962 |
| 1 | 34506613 | rs10799034 | 34510599 | rs1361670  | 0.942 |
| 1 | 34506613 | rs10799034 | 34514192 | rs880017   | 0.914 |
| 1 | 34506613 | rs10799034 | 34514539 | rs6425886  | 0.886 |
| 1 | 34506613 | rs10799034 | 34514843 | rs979336   | 0.962 |
| 1 | 34506613 | rs10799034 | 34515663 | rs1342153  | 0.962 |
| 1 | 34506613 | rs10799034 | 34521341 | rs9661105  | 0.855 |
| 1 | 34506764 | rs771396   | 34508639 | rs7524118  | 0.890 |
| 1 | 34506764 | rs771396   | 34510599 | rs1361670  | 0.868 |
| 1 | 34506764 | rs771396   | 34514192 | rs880017   | 0.894 |
| 1 | 34506764 | rs771396   | 34514539 | rs6425886  | 0.809 |
| 1 | 34506764 | rs771396   | 34514843 | rs979336   | 0.890 |
| 1 | 34506764 | rs771396   | 34515663 | rs1342153  | 0.890 |
| 1 | 34506764 | rs771396   | 34521341 | rs9661105  | 0.810 |
| 1 | 34508639 | rs7524118  | 34510599 | rs1361670  | 0.981 |
| 1 | 34508639 | rs7524118  | 34514192 | rs880017   | 0.953 |
| 1 | 34508639 | rs7524118  | 34514539 | rs6425886  | 0.927 |
| 1 | 34508639 | rs7524118  | 34514843 | rs979336   | 1.000 |
| 1 | 34508639 | rs7524118  | 34515663 | rs1342153  | 1.000 |
| 1 | 34508639 | rs7524118  | 34521341 | rs9661105  | 0.888 |
| 1 | 34510599 | rs1361670  | 34514192 | rs880017   | 0.971 |
| 1 | 34510599 | rs1361670  | 34514539 | rs6425886  | 0.944 |
| 1 | 34510599 | rs1361670  | 34514843 | rs979336   | 0.981 |
| 1 | 34510599 | rs1361670  | 34515663 | rs1342153  | 0.981 |
| 1 | 34510599 | rs1361670  | 34521341 | rs9661105  | 0.904 |
| 1 | 34514192 | rs880017   | 34514539 | rs6425886  | 0.914 |
| 1 | 34514192 | rs880017   | 34514843 | rs979336   | 0.953 |
| 1 | 34514192 | rs880017   | 34515663 | rs1342153  | 0.953 |
| 1 | 34514192 | rs880017   | 34521341 | rs9661105  | 0.911 |
| 1 | 34514539 | rs6425886  | 34514843 | rs979336   | 0.927 |
| 1 | 34514539 | rs6425886  | 34515663 | rs1342153  | 0.927 |
| 1 | 34514539 | rs6425886  | 34521341 | rs9661105  | 0.840 |
| 1 | 34514843 | rs979336   | 34515663 | rs1342153  | 1.000 |
| 1 | 34514843 | rs979336   | 34521341 | rs9661105  | 0.888 |
| 1 | 34515663 | rs1342153  | 34521341 | rs9661105  | 0.888 |
| 1 | 38397365 | rs4970570  | 38397962 | rs1809329  | 0.904 |
| 1 | 42225904 | rs642112   | 42276537 | rs10890176 | 0.587 |
| 1 | 42225904 | rs642112   | 42496837 | rs17377240 | 0.280 |



|   |          |            |          |            |       |
|---|----------|------------|----------|------------|-------|
| 1 | 44162979 | rs9326136  | 44206451 | rs7412307  | 0.849 |
| 1 | 44192835 | rs2486013  | 44206451 | rs7412307  | 0.239 |
| 1 | 46360474 | rs785495   | 46406461 | rs3855959  | 0.432 |
| 1 | 46828579 | rs956527   | 46897066 | rs611468   | 0.213 |
| 1 | 50826910 | rs3789586  | 50839538 | rs12083078 | 0.930 |
| 1 | 54547791 | rs4927088  | 54550150 | rs11206329 | 0.608 |
| 1 | 54891877 | rs9332417  | 54910882 | rs598130   | 0.274 |
| 1 | 54891877 | rs9332417  | 54916688 | rs498831   | 0.201 |
| 1 | 55257398 | rs2495505  | 55268627 | rs11206510 | 0.244 |
| 1 | 55704335 | rs11206601 | 55705932 | rs874664   | 0.917 |
| 1 | 55839140 | rs1392128  | 55885953 | rs12124393 | 0.748 |
| 1 | 55839140 | rs1392128  | 55938330 | rs2767515  | 0.300 |
| 1 | 55885953 | rs12124393 | 55938330 | rs2767515  | 0.431 |
| 1 | 55938330 | rs2767515  | 55973612 | rs2767499  | 0.296 |
| 1 | 57800162 | rs2805860  | 57815437 | rs947242   | 0.954 |
| 1 | 58225892 | rs1187994  | 58238604 | rs1187988  | 0.686 |
| 1 | 58250950 | rs12028704 | 58254617 | rs11207153 | 0.954 |
| 1 | 58592505 | rs4567304  | 58599898 | rs17496545 | 0.434 |
| 1 | 58658783 | rs697585   | 58675926 | rs706430   | 0.785 |
| 1 | 63679468 | rs2036867  | 63755548 | rs12078371 | 0.974 |
| 1 | 63881947 | rs2269239  | 63897660 | rs11208264 | 0.359 |
| 1 | 63881947 | rs2269239  | 63900797 | rs2013012  | 0.463 |
| 1 | 63897660 | rs11208264 | 63900797 | rs2013012  | 0.233 |
| 1 | 63897660 | rs11208264 | 63932834 | rs6678106  | 0.276 |
| 1 | 64245244 | rs285393   | 64250080 | rs285400   | 0.759 |
| 1 | 64250080 | rs285400   | 64260828 | rs834489   | 0.227 |
| 1 | 64250080 | rs285400   | 65192778 | rs7553101  | 0.215 |
| 1 | 65454131 | rs4916031  | 65461049 | rs6677191  | 0.473 |
| 1 | 65808327 | rs3790432  | 65815607 | rs3790426  | 0.903 |
| 1 | 66217237 | rs2503197  | 66224365 | rs1317611  | 0.578 |
| 1 | 66217237 | rs2503197  | 66242794 | rs2186122  | 0.762 |
| 1 | 66217237 | rs2503197  | 66246509 | rs2489907  | 0.568 |
| 1 | 66224365 | rs1317611  | 66242794 | rs2186122  | 0.471 |
| 1 | 66224365 | rs1317611  | 66246509 | rs2489907  | 0.769 |
| 1 | 66242794 | rs2186122  | 66246509 | rs2489907  | 0.504 |
| 1 | 68721727 | rs10789263 | 68794759 | rs1924529  | 0.788 |
| 1 | 69913646 | rs11209514 | 69916151 | rs12133092 | 0.930 |
| 1 | 69913646 | rs11209514 | 69921347 | rs12022970 | 0.941 |
| 1 | 69916151 | rs12133092 | 69921347 | rs12022970 | 0.986 |
| 1 | 70272500 | rs17131142 | 70272705 | rs12025814 | 0.828 |
| 1 | 70272500 | rs17131142 | 70461803 | rs2274913  | 0.327 |
| 1 | 70272705 | rs12025814 | 70461803 | rs2274913  | 0.255 |
| 1 | 72011020 | rs2125777  | 72015178 | rs1491198  | 0.874 |
| 1 | 73692628 | rs647478   | 73705474 | rs12140865 | 0.828 |

|   |           |            |           |            |       |
|---|-----------|------------|-----------|------------|-------|
| 1 | 73692628  | rs647478   | 73713306  | rs6701520  | 0.813 |
| 1 | 73692628  | rs647478   | 73748346  | rs7534840  | 0.525 |
| 1 | 73705474  | rs12140865 | 73713306  | rs6701520  | 0.952 |
| 1 | 73705474  | rs12140865 | 73748346  | rs7534840  | 0.636 |
| 1 | 73713306  | rs6701520  | 73748346  | rs7534840  | 0.598 |
| 1 | 75014984  | rs1475396  | 75024722  | rs10874274 | 0.924 |
| 1 | 75014984  | rs1475396  | 75032916  | rs927904   | 0.973 |
| 1 | 75024722  | rs10874274 | 75032916  | rs927904   | 0.947 |
| 1 | 78775177  | rs12731181 | 78820018  | rs1333978  | 0.282 |
| 1 | 79778531  | rs12751985 | 79849115  | rs2374186  | 0.390 |
| 1 | 80577091  | rs35020936 | 80611468  | rs2997195  | 0.266 |
| 1 | 80577091  | rs35020936 | 80629549  | rs1365752  | 0.690 |
| 1 | 80611468  | rs2997195  | 80629549  | rs1365752  | 0.329 |
| 1 | 85843032  | rs9803850  | 85898341  | rs10493773 | 0.410 |
| 1 | 86930717  | rs692739   | 87227506  | rs2390220  | 0.296 |
| 1 | 87542558  | rs1888337  | 87549430  | rs4655952  | 0.893 |
| 1 | 88841271  | rs11590752 | 88998564  | rs430600   | 0.589 |
| 1 | 88841271  | rs11590752 | 89134355  | rs10922504 | 0.288 |
| 1 | 88998564  | rs430600   | 89134355  | rs10922504 | 0.594 |
| 1 | 88998564  | rs430600   | 89200041  | rs1325922  | 0.450 |
| 1 | 89088833  | rs12405169 | 89429449  | rs6667970  | 0.271 |
| 1 | 89134355  | rs10922504 | 89200041  | rs1325922  | 0.460 |
| 1 | 91048019  | rs10493841 | 91051894  | rs10922929 | 1.000 |
| 1 | 91048019  | rs10493841 | 91052106  | rs1725430  | 0.641 |
| 1 | 91051894  | rs10922929 | 91052106  | rs1725430  | 0.644 |
| 1 | 92173025  | rs11165840 | 92191962  | rs766665   | 0.742 |
| 1 | 93532515  | rs6687359  | 93568520  | rs4847409  | 1.000 |
| 1 | 93991061  | rs4075523  | 93996357  | rs4240956  | 0.928 |
| 1 | 94000572  | rs7515462  | 94014144  | rs2391313  | 1.000 |
| 1 | 94000572  | rs7515462  | 94022128  | rs1004197  | 0.886 |
| 1 | 94000572  | rs7515462  | 94055681  | rs6692717  | 0.912 |
| 1 | 94014144  | rs2391313  | 94022128  | rs1004197  | 0.886 |
| 1 | 94014144  | rs2391313  | 94055681  | rs6692717  | 0.912 |
| 1 | 94022128  | rs1004197  | 94055681  | rs6692717  | 0.991 |
| 1 | 94730966  | rs1749541  | 94762365  | rs7555399  | 0.233 |
| 1 | 94984405  | rs1760512  | 95065079  | rs12048606 | 0.212 |
| 1 | 95831138  | rs10489562 | 95848258  | rs1509173  | 0.923 |
| 1 | 95831138  | rs10489562 | 95860780  | rs621485   | 0.468 |
| 1 | 95848258  | rs1509173  | 95860780  | rs621485   | 0.487 |
| 1 | 99382703  | rs302756   | 99390673  | rs302765   | 0.863 |
| 1 | 99382703  | rs302756   | 99416551  | rs668206   | 0.254 |
| 1 | 99390673  | rs302765   | 99416551  | rs668206   | 0.226 |
| 1 | 99871758  | rs7529598  | 99872120  | rs10875240 | 0.955 |
| 1 | 100050187 | rs1565744  | 100089177 | rs2307130  | 0.413 |

|   |           |            |           |            |       |
|---|-----------|------------|-----------|------------|-------|
| 1 | 102167808 | rs7515984  | 102176835 | rs755181   | 0.708 |
| 1 | 102167808 | rs7515984  | 102181350 | rs7512461  | 0.702 |
| 1 | 102167808 | rs7515984  | 102184466 | rs11583344 | 0.605 |
| 1 | 102176835 | rs755181   | 102181350 | rs7512461  | 1.000 |
| 1 | 102176835 | rs755181   | 102184466 | rs11583344 | 0.934 |
| 1 | 102181350 | rs7512461  | 102184466 | rs11583344 | 0.934 |
| 1 | 110217322 | rs12036949 | 110218390 | rs7522621  | 0.970 |
| 1 | 111954125 | rs2477425  | 111985163 | rs1324889  | 0.418 |
| 1 | 112388477 | rs4839202  | 112399680 | rs269080   | 0.307 |
| 1 | 112388477 | rs4839202  | 112405977 | rs17740750 | 0.514 |
| 1 | 112388477 | rs4839202  | 112410575 | rs370258   | 0.303 |
| 1 | 112388477 | rs4839202  | 112427091 | rs7531453  | 0.370 |
| 1 | 112388477 | rs4839202  | 112436461 | rs269097   | 0.330 |
| 1 | 112399680 | rs269080   | 112405977 | rs17740750 | 0.451 |
| 1 | 112399680 | rs269080   | 112410575 | rs370258   | 0.798 |
| 1 | 112399680 | rs269080   | 112436461 | rs269097   | 0.428 |
| 1 | 112405977 | rs17740750 | 112410575 | rs370258   | 0.515 |
| 1 | 112405977 | rs17740750 | 112427091 | rs7531453  | 0.502 |
| 1 | 112405977 | rs17740750 | 112436461 | rs269097   | 0.341 |
| 1 | 112410575 | rs370258   | 112436461 | rs269097   | 0.418 |
| 1 | 112427091 | rs7531453  | 112436461 | rs269097   | 0.575 |
| 1 | 112524987 | rs1992509  | 112563816 | rs1416203  | 0.678 |
| 1 | 112563816 | rs1416203  | 112582141 | rs2998359  | 0.253 |
| 1 | 112582141 | rs2998359  | 112583351 | rs1371690  | 0.844 |
| 1 | 113890839 | rs17013326 | 113941445 | rs1217226  | 0.718 |
| 1 | 113890839 | rs17013326 | 114045700 | rs1230649  | 0.841 |
| 1 | 113890839 | rs17013326 | 114139759 | rs1217396  | 0.834 |
| 1 | 113890839 | rs17013326 | 114216891 | rs2488457  | 0.716 |
| 1 | 113941445 | rs1217226  | 114045700 | rs1230649  | 0.646 |
| 1 | 113941445 | rs1217226  | 114139759 | rs1217396  | 0.645 |
| 1 | 113941445 | rs1217226  | 114216891 | rs2488457  | 0.558 |
| 1 | 114045700 | rs1230649  | 114139759 | rs1217396  | 0.985 |
| 1 | 114045700 | rs1230649  | 114216891 | rs2488457  | 0.858 |
| 1 | 114139759 | rs1217396  | 114216891 | rs2488457  | 0.851 |
| 1 | 118234461 | rs12116827 | 118269162 | rs2208375  | 0.276 |
| 1 | 145134659 | rs6668865  | 145159853 | rs2354432  | 0.297 |
| 1 | 149678259 | rs12751531 | 149695229 | rs10736380 | 0.908 |
| 1 | 151267854 | rs11205174 | 151317140 | rs10888528 | 0.418 |
| 1 | 153091894 | rs11264275 | 153149168 | rs10908448 | 0.251 |
| 1 | 153091894 | rs11264275 | 153153441 | rs4845690  | 0.251 |
| 1 | 153149168 | rs10908448 | 153153441 | rs4845690  | 0.992 |
| 1 | 156433933 | rs7530662  | 156451439 | rs393304   | 0.238 |
| 1 | 159099423 | rs7410867  | 159166407 | rs11587040 | 0.218 |
| 1 | 160445222 | rs4657171  | 160452056 | rs12064639 | 0.438 |

|   |           |            |           |            |       |
|---|-----------|------------|-----------|------------|-------|
| 1 | 165155988 | rs11579987 | 165214305 | rs7545911  | 0.266 |
| 1 | 165155988 | rs11579987 | 165216603 | rs6682062  | 0.266 |
| 1 | 165155988 | rs11579987 | 165218493 | rs6688613  | 0.422 |
| 1 | 165155988 | rs11579987 | 165219534 | rs1327866  | 0.422 |
| 1 | 165214305 | rs7545911  | 165216603 | rs6682062  | 1.000 |
| 1 | 165214305 | rs7545911  | 165218493 | rs6688613  | 0.790 |
| 1 | 165214305 | rs7545911  | 165219534 | rs1327866  | 0.790 |
| 1 | 165216603 | rs6682062  | 165218493 | rs6688613  | 0.790 |
| 1 | 165216603 | rs6682062  | 165219534 | rs1327866  | 0.790 |
| 1 | 165218493 | rs6688613  | 165219534 | rs1327866  | 1.000 |
| 1 | 165323807 | rs12133491 | 165333233 | rs10127714 | 0.331 |
| 1 | 165562462 | rs6427082  | 165568622 | rs10918683 | 0.404 |
| 1 | 167457279 | rs6688139  | 167466049 | rs6703463  | 0.990 |
| 1 | 167457279 | rs6688139  | 167547862 | rs1856303  | 0.372 |
| 1 | 167466049 | rs6703463  | 167547862 | rs1856303  | 0.360 |
| 1 | 170459926 | rs41516352 | 170460291 | rs12411264 | 0.942 |
| 1 | 170459926 | rs41516352 | 170475494 | rs4072117  | 0.928 |
| 1 | 170460291 | rs12411264 | 170475494 | rs4072117  | 0.985 |
| 1 | 170943797 | rs10798178 | 170995569 | rs859627   | 0.269 |
| 1 | 173562004 | rs10912957 | 173565216 | rs10489322 | 0.982 |
| 1 | 173818063 | rs4570382  | 173833340 | rs12065732 | 0.353 |
| 1 | 174720725 | rs2206503  | 174784152 | rs2206511  | 0.271 |
| 1 | 175569595 | rs4652245  | 175571563 | rs4140633  | 0.459 |
| 1 | 175569595 | rs4652245  | 175572481 | rs3946142  | 0.829 |
| 1 | 175569595 | rs4652245  | 175580821 | rs6658794  | 0.611 |
| 1 | 175571563 | rs4140633  | 175572481 | rs3946142  | 0.663 |
| 1 | 175571563 | rs4140633  | 175580821 | rs6658794  | 0.349 |
| 1 | 175572481 | rs3946142  | 175580821 | rs6658794  | 0.667 |
| 1 | 177726177 | rs6674086  | 177726299 | rs6674274  | 0.681 |
| 1 | 177726177 | rs6674086  | 177763642 | rs964983   | 0.967 |
| 1 | 177726177 | rs6674086  | 177784337 | rs11577538 | 0.604 |
| 1 | 177726177 | rs6674086  | 177828766 | rs4652420  | 0.213 |
| 1 | 177726299 | rs6674274  | 177763642 | rs964983   | 0.669 |
| 1 | 177726299 | rs6674274  | 177784337 | rs11577538 | 0.426 |
| 1 | 177726299 | rs6674274  | 177828766 | rs4652420  | 0.328 |
| 1 | 177726299 | rs6674274  | 177835711 | rs4652424  | 0.217 |
| 1 | 177763642 | rs964983   | 177784337 | rs11577538 | 0.651 |
| 1 | 177763642 | rs964983   | 177828766 | rs4652420  | 0.211 |
| 1 | 177814890 | rs1887816  | 177818275 | rs1887814  | 0.752 |
| 1 | 177828766 | rs4652420  | 177835711 | rs4652424  | 0.366 |
| 1 | 178971588 | rs7548318  | 178999746 | rs2331886  | 0.723 |
| 1 | 179836514 | rs4651109  | 179863063 | rs199940   | 0.463 |
| 1 | 181856005 | rs16861243 | 181904975 | rs9633306  | 0.856 |
| 1 | 181856005 | rs16861243 | 181924722 | rs12088165 | 0.892 |

|   |           |            |           |            |       |
|---|-----------|------------|-----------|------------|-------|
| 1 | 181904975 | rs9633306  | 181924722 | rs12088165 | 0.807 |
| 1 | 185301683 | rs10911991 | 185321946 | rs17545182 | 0.246 |
| 1 | 187265926 | rs10921118 | 187447701 | rs1342554  | 0.386 |
| 1 | 187265926 | rs10921118 | 187885135 | rs499557   | 0.220 |
| 1 | 187885135 | rs499557   | 187927195 | rs494978   | 0.899 |
| 1 | 188508873 | rs10800939 | 188547582 | rs505600   | 0.831 |
| 1 | 188789599 | rs814953   | 188929461 | rs1325220  | 0.361 |
| 1 | 191920912 | rs7541624  | 191930411 | rs1416599  | 0.221 |
| 1 | 191920912 | rs7541624  | 191944757 | rs12024767 | 0.231 |
| 1 | 191920912 | rs7541624  | 191967952 | rs7527158  | 0.231 |
| 1 | 191920912 | rs7541624  | 191968573 | rs6673280  | 0.244 |
| 1 | 191930411 | rs1416599  | 191944757 | rs12024767 | 0.852 |
| 1 | 191930411 | rs1416599  | 191949253 | rs16835697 | 0.216 |
| 1 | 191930411 | rs1416599  | 191967952 | rs7527158  | 0.800 |
| 1 | 191930411 | rs1416599  | 191968573 | rs6673280  | 0.845 |
| 1 | 191944757 | rs12024767 | 191949253 | rs16835697 | 0.255 |
| 1 | 191944757 | rs12024767 | 191967952 | rs7527158  | 0.925 |
| 1 | 191944757 | rs12024767 | 191968573 | rs6673280  | 0.982 |
| 1 | 191944757 | rs12024767 | 192021429 | rs41516151 | 0.235 |
| 1 | 191949253 | rs16835697 | 191967952 | rs7527158  | 0.236 |
| 1 | 191949253 | rs16835697 | 191968573 | rs6673280  | 0.245 |
| 1 | 191949253 | rs16835697 | 192021429 | rs41516151 | 0.884 |
| 1 | 191967952 | rs7527158  | 191968573 | rs6673280  | 0.914 |
| 1 | 191967952 | rs7527158  | 192021429 | rs41516151 | 0.216 |
| 1 | 191968573 | rs6673280  | 192021429 | rs41516151 | 0.225 |
| 1 | 193431315 | rs591575   | 193528686 | rs17661321 | 0.567 |
| 1 | 194126300 | rs3010143  | 194131227 | rs3008578  | 0.896 |
| 1 | 194126300 | rs3010143  | 194139079 | rs3010149  | 0.587 |
| 1 | 194126300 | rs3010143  | 194141413 | rs1451920  | 0.386 |
| 1 | 194126300 | rs3010143  | 194142828 | rs3010151  | 0.844 |
| 1 | 194131227 | rs3008578  | 194139079 | rs3010149  | 0.651 |
| 1 | 194131227 | rs3008578  | 194141413 | rs1451920  | 0.397 |
| 1 | 194131227 | rs3008578  | 194142828 | rs3010151  | 0.854 |
| 1 | 194139079 | rs3010149  | 194141413 | rs1451920  | 0.232 |
| 1 | 194139079 | rs3010149  | 194142828 | rs3010151  | 0.574 |
| 1 | 194141413 | rs1451920  | 194142828 | rs3010151  | 0.419 |
| 1 | 197142881 | rs1322916  | 197209638 | rs2154328  | 0.290 |
| 1 | 197181925 | rs12048004 | 197209638 | rs2154328  | 0.215 |
| 1 | 199153514 | rs404339   | 199186985 | rs11579874 | 0.862 |
| 1 | 199379604 | rs8158     | 199383377 | rs6664337  | 0.947 |
| 1 | 199464431 | rs12466    | 199533697 | rs2268156  | 0.248 |
| 1 | 202390294 | rs11571093 | 202406807 | rs16853059 | 0.266 |
| 1 | 202398933 | rs10900555 | 202416146 | rs10900558 | 0.649 |
| 1 | 202398933 | rs10900555 | 202423791 | rs4951315  | 0.580 |

|   |           |            |           |            |       |
|---|-----------|------------|-----------|------------|-------|
| 1 | 202398933 | rs10900555 | 202427649 | rs7538038  | 0.324 |
| 1 | 202398933 | rs10900555 | 202428835 | rs12097666 | 0.339 |
| 1 | 202416146 | rs10900558 | 202423791 | rs4951315  | 0.767 |
| 1 | 202416146 | rs10900558 | 202427649 | rs7538038  | 0.402 |
| 1 | 202416146 | rs10900558 | 202428835 | rs12097666 | 0.420 |
| 1 | 202423791 | rs4951315  | 202427649 | rs7538038  | 0.348 |
| 1 | 202423791 | rs4951315  | 202428835 | rs12097666 | 0.364 |
| 1 | 202427649 | rs7538038  | 202428835 | rs12097666 | 0.986 |
| 1 | 203874755 | rs11579937 | 203874776 | rs11581303 | 0.236 |
| 1 | 203964468 | rs1620334  | 203991651 | rs823122   | 0.740 |
| 1 | 208237598 | rs7543650  | 208348969 | rs2451696  | 0.904 |
| 1 | 209753483 | rs10863911 | 209753674 | rs4287239  | 0.597 |
| 1 | 210992052 | rs1507357  | 211011500 | rs6687672  | 1.000 |
| 1 | 210992052 | rs1507357  | 211071635 | rs6694190  | 0.744 |
| 1 | 211011500 | rs6687672  | 211071635 | rs6694190  | 0.744 |
| 1 | 211159262 | rs870547   | 211159608 | rs6679848  | 0.965 |
| 1 | 211159262 | rs870547   | 211159656 | rs6679938  | 0.932 |
| 1 | 211159262 | rs870547   | 211162146 | rs6656232  | 0.949 |
| 1 | 211159608 | rs6679848  | 211159656 | rs6679938  | 0.965 |
| 1 | 211159608 | rs6679848  | 211162146 | rs6656232  | 0.983 |
| 1 | 211159656 | rs6679938  | 211162146 | rs6656232  | 0.965 |
| 1 | 213202375 | rs6667184  | 213205803 | rs562410   | 0.293 |
| 1 | 213202375 | rs6667184  | 213231930 | rs1452623  | 0.358 |
| 1 | 213205803 | rs562410   | 213265201 | rs1377173  | 0.566 |
| 1 | 213265201 | rs1377173  | 213446975 | rs12753507 | 0.231 |
| 1 | 213265201 | rs1377173  | 213698123 | rs1319603  | 0.245 |
| 1 | 213337026 | rs4375232  | 213698123 | rs1319603  | 0.259 |
| 1 | 213446975 | rs12753507 | 213482243 | rs946489   | 0.668 |
| 1 | 213446975 | rs12753507 | 213484064 | rs10864169 | 0.670 |
| 1 | 213446975 | rs12753507 | 213484176 | rs4655397  | 0.670 |
| 1 | 213446975 | rs12753507 | 213698123 | rs1319603  | 0.646 |
| 1 | 213482243 | rs946489   | 213484064 | rs10864169 | 1.000 |
| 1 | 213482243 | rs946489   | 213484176 | rs4655397  | 1.000 |
| 1 | 213482243 | rs946489   | 213698123 | rs1319603  | 0.802 |
| 1 | 213484064 | rs10864169 | 213484176 | rs4655397  | 1.000 |
| 1 | 213484064 | rs10864169 | 213698123 | rs1319603  | 0.804 |
| 1 | 213484176 | rs4655397  | 213698123 | rs1319603  | 0.804 |
| 1 | 213863644 | rs17024993 | 213888054 | rs6665928  | 0.910 |
| 1 | 214184195 | rs654702   | 214184463 | rs531780   | 0.989 |
| 1 | 215499147 | rs17653435 | 215538967 | rs10495053 | 0.271 |
| 1 | 217079925 | rs4846281  | 217087235 | rs653734   | 0.570 |
| 1 | 220052795 | rs11118868 | 220070531 | rs4846728  | 0.905 |
| 1 | 220070531 | rs4846728  | 220099305 | rs10863665 | 0.235 |
| 1 | 221378230 | rs1640827  | 221418246 | rs4140967  | 0.389 |

|   |           |            |           |            |       |
|---|-----------|------------|-----------|------------|-------|
| 1 | 221973921 | rs17557525 | 222033974 | rs12088254 | 0.248 |
| 1 | 221973921 | rs17557525 | 222090357 | rs6678365  | 0.391 |
| 1 | 222033974 | rs12088254 | 222090357 | rs6678365  | 0.529 |
| 1 | 222894120 | rs1603918  | 222897964 | rs7535296  | 0.991 |
| 1 | 222894120 | rs1603918  | 222948451 | rs1436171  | 0.829 |
| 1 | 222894120 | rs1603918  | 222952691 | rs2897161  | 0.906 |
| 1 | 222894120 | rs1603918  | 222957663 | rs10915699 | 0.838 |
| 1 | 222897964 | rs7535296  | 222948451 | rs1436171  | 0.837 |
| 1 | 222897964 | rs7535296  | 222952691 | rs2897161  | 0.914 |
| 1 | 222897964 | rs7535296  | 222957663 | rs10915699 | 0.846 |
| 1 | 222948451 | rs1436171  | 222952691 | rs2897161  | 0.923 |
| 1 | 222948451 | rs1436171  | 222957663 | rs10915699 | 0.991 |
| 1 | 222952691 | rs2897161  | 222957663 | rs10915699 | 0.933 |
| 1 | 226482124 | rs1629294  | 226490418 | rs2776856  | 0.981 |
| 1 | 226482124 | rs1629294  | 226491223 | rs1757139  | 0.981 |
| 1 | 226482124 | rs1629294  | 226525596 | rs533738   | 0.265 |
| 1 | 226490418 | rs2776856  | 226491223 | rs1757139  | 1.000 |
| 1 | 226490418 | rs2776856  | 226525596 | rs533738   | 0.249 |
| 1 | 226491223 | rs1757139  | 226525596 | rs533738   | 0.249 |
| 1 | 227235445 | rs7517398  | 227281341 | rs545321   | 0.256 |
| 1 | 229986844 | rs17817356 | 229989968 | rs9803690  | 0.312 |
| 1 | 230194387 | rs4658972  | 230195957 | rs12406771 | 0.883 |
| 1 | 230684634 | rs12117428 | 230686695 | rs1409370  | 1.000 |
| 1 | 231140152 | rs4649417  | 231216893 | rs6424263  | 0.360 |
| 1 | 231211946 | rs732169   | 231216893 | rs6424263  | 0.351 |
| 1 | 231211946 | rs732169   | 231218775 | rs3766484  | 0.779 |
| 1 | 231216893 | rs6424263  | 231218775 | rs3766484  | 0.432 |
| 1 | 236083873 | rs790892   | 236114948 | rs2298100  | 0.775 |
| 1 | 237816943 | rs10802776 | 237823815 | rs997538   | 0.768 |
| 1 | 239557424 | rs4659598  | 239561201 | rs7512603  | 0.638 |
| 1 | 239640170 | rs9428505  | 239640279 | rs10802963 | 0.982 |
| 1 | 240628728 | rs2580238  | 240629344 | rs2809985  | 0.609 |
| 1 | 241705841 | rs10927025 | 241708043 | rs2994339  | 0.224 |
| 1 | 241708043 | rs2994339  | 241717339 | rs4658574  | 0.552 |
| 1 | 245609461 | rs11802371 | 245613957 | rs7555997  | 0.279 |
| 2 | 192993    | rs449725   | 253270    | rs10167992 | 0.204 |
| 2 | 2420158   | rs10177243 | 2426972   | rs4853940  | 0.336 |
| 2 | 6083374   | rs2693822  | 6144872   | rs1852317  | 0.348 |
| 2 | 6346425   | rs16865015 | 6352038   | rs4337447  | 0.807 |
| 2 | 6648243   | rs12478619 | 6655887   | rs6749132  | 0.987 |
| 2 | 6648243   | rs12478619 | 6703172   | rs4669090  | 0.643 |
| 2 | 6648243   | rs12478619 | 6705721   | rs6761066  | 0.311 |
| 2 | 6648243   | rs12478619 | 6712276   | rs7564462  | 0.285 |
| 2 | 6655887   | rs6749132  | 6703172   | rs4669090  | 0.653 |

|   |          |            |          |            |       |
|---|----------|------------|----------|------------|-------|
| 2 | 6655887  | rs6749132  | 6705721  | rs6761066  | 0.317 |
| 2 | 6655887  | rs6749132  | 6712276  | rs7564462  | 0.271 |
| 2 | 6703172  | rs4669090  | 6705721  | rs6761066  | 0.486 |
| 2 | 6703172  | rs4669090  | 6712276  | rs7564462  | 0.385 |
| 2 | 6705721  | rs6761066  | 6712276  | rs7564462  | 0.342 |
| 2 | 6757301  | rs307972   | 6775281  | rs182537   | 0.983 |
| 2 | 6757301  | rs307972   | 6777986  | rs379656   | 0.951 |
| 2 | 6775281  | rs182537   | 6777986  | rs379656   | 0.967 |
| 2 | 7032516  | rs771256   | 7033528  | rs4669123  | 0.485 |
| 2 | 8703783  | rs11691910 | 8705870  | rs4669321  | 0.288 |
| 2 | 9967149  | rs12479251 | 9982242  | rs17364189 | 0.492 |
| 2 | 11478414 | rs7602665  | 11501448 | rs6432193  | 0.217 |
| 2 | 11479223 | rs6743597  | 11501448 | rs6432193  | 0.228 |
| 2 | 12188138 | rs6720015  | 12190544 | rs6728621  | 0.282 |
| 2 | 14405331 | rs17344070 | 14475445 | rs1976727  | 0.235 |
| 2 | 15111625 | rs10185181 | 15111754 | rs12466657 | 0.580 |
| 2 | 15111625 | rs10185181 | 15112010 | rs1430804  | 0.990 |
| 2 | 15111754 | rs12466657 | 15112010 | rs1430804  | 0.577 |
| 2 | 15395815 | rs6431692  | 15509470 | rs6723148  | 0.535 |
| 2 | 15948018 | rs2254328  | 15948478 | rs746104   | 0.463 |
| 2 | 16472596 | rs4832592  | 16519793 | rs6729772  | 0.261 |
| 2 | 18667353 | rs17752832 | 18729707 | rs16985416 | 0.381 |
| 2 | 20138384 | rs1466418  | 20138874 | rs10178084 | 0.962 |
| 2 | 21236291 | rs527034   | 21252721 | rs478442   | 0.954 |
| 2 | 22407217 | rs6743484  | 22466143 | rs1396725  | 0.451 |
| 2 | 23449055 | rs2577698  | 23449391 | rs2954818  | 0.959 |
| 2 | 23464343 | rs11125011 | 23469562 | rs6742888  | 0.528 |
| 2 | 24586072 | rs11125629 | 24767629 | rs2119120  | 0.226 |
| 2 | 24586072 | rs11125629 | 24892380 | rs934609   | 0.656 |
| 2 | 26677750 | rs1276123  | 27294806 | rs1275537  | 0.201 |
| 2 | 26765249 | rs1275985  | 26765583 | rs1275986  | 0.991 |
| 2 | 27872679 | rs4666014  | 28220753 | rs7608642  | 0.217 |
| 2 | 28195657 | rs1948922  | 28211838 | rs13408504 | 0.592 |
| 2 | 28195657 | rs1948922  | 28211983 | rs11127133 | 0.800 |
| 2 | 28195657 | rs1948922  | 28220753 | rs7608642  | 0.543 |
| 2 | 28211838 | rs13408504 | 28211983 | rs11127133 | 0.814 |
| 2 | 28211838 | rs13408504 | 28220753 | rs7608642  | 0.940 |
| 2 | 28211983 | rs11127133 | 28220753 | rs7608642  | 0.751 |
| 2 | 29555940 | rs3885975  | 29580732 | rs10445907 | 0.290 |
| 2 | 29895721 | rs10187657 | 29928397 | rs4473347  | 0.210 |
| 2 | 30758021 | rs2609938  | 30838175 | rs6548031  | 0.430 |
| 2 | 30758021 | rs2609938  | 31241433 | rs12620887 | 0.256 |
| 2 | 30838175 | rs6548031  | 31241433 | rs12620887 | 0.318 |
| 2 | 31935601 | rs10490358 | 32009898 | rs17011711 | 0.919 |



|   |          |            |          |            |       |
|---|----------|------------|----------|------------|-------|
| 2 | 36543597 | rs3770866  | 36543746 | rs848534   | 0.481 |
| 2 | 37611381 | rs4430920  | 37616264 | rs4538180  | 0.918 |
| 2 | 39079775 | rs6544186  | 39385585 | rs7595469  | 0.433 |
| 2 | 39079775 | rs6544186  | 39952885 | rs6727511  | 0.218 |
| 2 | 39385585 | rs7595469  | 39952885 | rs6727511  | 0.235 |
| 2 | 41414230 | rs6750424  | 41468994 | rs6544414  | 0.640 |
| 2 | 41871478 | rs7603589  | 41894842 | rs7599972  | 0.504 |
| 2 | 41871478 | rs7603589  | 41896380 | rs10193285 | 0.497 |
| 2 | 41871478 | rs7603589  | 41900097 | rs12471624 | 0.480 |
| 2 | 41871478 | rs7603589  | 41902588 | rs11689557 | 0.392 |
| 2 | 41871478 | rs7603589  | 41909614 | rs4142227  | 0.351 |
| 2 | 41871478 | rs7603589  | 41922400 | rs11692115 | 0.609 |
| 2 | 41894842 | rs7599972  | 41896380 | rs10193285 | 0.274 |
| 2 | 41894842 | rs7599972  | 41900097 | rs12471624 | 0.283 |
| 2 | 41894842 | rs7599972  | 41902588 | rs11689557 | 0.690 |
| 2 | 41894842 | rs7599972  | 41909614 | rs4142227  | 0.676 |
| 2 | 41894842 | rs7599972  | 41922400 | rs11692115 | 0.293 |
| 2 | 41896380 | rs10193285 | 41900097 | rs12471624 | 0.991 |
| 2 | 41896380 | rs10193285 | 41922400 | rs11692115 | 0.277 |
| 2 | 41900097 | rs12471624 | 41922400 | rs11692115 | 0.250 |
| 2 | 41902588 | rs11689557 | 41909614 | rs4142227  | 0.887 |
| 2 | 41902588 | rs11689557 | 41922400 | rs11692115 | 0.273 |
| 2 | 41909614 | rs4142227  | 41922400 | rs11692115 | 0.303 |
| 2 | 42108584 | rs2374382  | 42142611 | rs4952399  | 0.265 |
| 2 | 42108584 | rs2374382  | 42158635 | rs13383145 | 0.343 |
| 2 | 42142611 | rs4952399  | 42158635 | rs13383145 | 0.579 |
| 2 | 42949290 | rs4408769  | 42949492 | rs6722743  | 0.870 |
| 2 | 43633169 | rs1873555  | 43656932 | rs6731009  | 0.902 |
| 2 | 43633169 | rs1873555  | 43660872 | rs11890152 | 0.883 |
| 2 | 43656932 | rs6731009  | 43660872 | rs11890152 | 0.979 |
| 2 | 44258406 | rs13008237 | 44300435 | rs5024499  | 0.850 |
| 2 | 45592549 | rs17322370 | 45623898 | rs748573   | 0.221 |
| 2 | 45597896 | rs10427402 | 45623898 | rs748573   | 0.623 |
| 2 | 47947841 | rs874869   | 48253519 | rs4146603  | 0.286 |
| 2 | 52942850 | rs6746666  | 53072707 | rs1446439  | 0.207 |
| 2 | 54623147 | rs4261758  | 54658913 | rs12713265 | 0.282 |
| 2 | 55036454 | rs10196667 | 55068416 | rs2580770  | 0.402 |
| 2 | 56541768 | rs1465360  | 56542552 | rs13382678 | 0.751 |
| 2 | 56541768 | rs1465360  | 56631513 | rs10208385 | 0.598 |
| 2 | 56541768 | rs1465360  | 56651833 | rs1991185  | 0.616 |
| 2 | 56542552 | rs13382678 | 56631513 | rs10208385 | 0.691 |
| 2 | 56542552 | rs13382678 | 56651833 | rs1991185  | 0.539 |
| 2 | 56631513 | rs10208385 | 56651833 | rs1991185  | 0.770 |
| 2 | 56931249 | rs6741957  | 57151802 | rs12478403 | 0.215 |

|   |          |            |          |            |       |
|---|----------|------------|----------|------------|-------|
| 2 | 58376084 | rs13399274 | 58503859 | rs4672240  | 0.235 |
| 2 | 58376084 | rs13399274 | 58505942 | rs10179027 | 0.236 |
| 2 | 58376084 | rs13399274 | 58517880 | rs6759994  | 0.230 |
| 2 | 58376084 | rs13399274 | 58706520 | rs7419776  | 0.265 |
| 2 | 58472642 | rs4672238  | 58519124 | rs1019283  | 0.526 |
| 2 | 58503859 | rs4672240  | 58505942 | rs10179027 | 0.981 |
| 2 | 58503859 | rs4672240  | 58517880 | rs6759994  | 0.954 |
| 2 | 58505942 | rs10179027 | 58517880 | rs6759994  | 0.972 |
| 2 | 58706520 | rs7419776  | 58711046 | rs4672251  | 0.430 |
| 2 | 58706520 | rs7419776  | 58767709 | rs17614872 | 0.682 |
| 2 | 58711046 | rs4672251  | 58767709 | rs17614872 | 0.292 |
| 2 | 58711046 | rs4672251  | 58896351 | rs4671330  | 0.201 |
| 2 | 58896351 | rs4671330  | 58948113 | rs1990588  | 0.639 |
| 2 | 60187236 | rs887930   | 60201921 | rs6714188  | 0.219 |
| 2 | 60187236 | rs887930   | 60204549 | rs13420896 | 0.220 |
| 2 | 60187236 | rs887930   | 60204636 | rs13411643 | 0.208 |
| 2 | 60187236 | rs887930   | 60205897 | rs13427381 | 0.230 |
| 2 | 60201921 | rs6714188  | 60204549 | rs13420896 | 0.941 |
| 2 | 60201921 | rs6714188  | 60204636 | rs13411643 | 0.986 |
| 2 | 60201921 | rs6714188  | 60205897 | rs13427381 | 0.985 |
| 2 | 60204549 | rs13420896 | 60204636 | rs13411643 | 0.957 |
| 2 | 60204549 | rs13420896 | 60205897 | rs13427381 | 0.926 |
| 2 | 60204636 | rs13411643 | 60205897 | rs13427381 | 0.971 |
| 2 | 60483113 | rs888082   | 60491160 | rs10445937 | 0.438 |
| 2 | 62667670 | rs6545961  | 62676395 | rs6545963  | 0.916 |
| 2 | 62667670 | rs6545961  | 62712546 | rs6752010  | 0.597 |
| 2 | 62667670 | rs6545961  | 62740514 | rs10177638 | 0.614 |
| 2 | 62667670 | rs6545961  | 62745256 | rs6757128  | 0.660 |
| 2 | 62676395 | rs6545963  | 62712546 | rs6752010  | 0.632 |
| 2 | 62676395 | rs6545963  | 62740514 | rs10177638 | 0.668 |
| 2 | 62676395 | rs6545963  | 62745256 | rs6757128  | 0.703 |
| 2 | 62712546 | rs6752010  | 62740514 | rs10177638 | 0.792 |
| 2 | 62712546 | rs6752010  | 62745256 | rs6757128  | 0.837 |
| 2 | 62740514 | rs10177638 | 62745256 | rs6757128  | 0.886 |
| 2 | 64733367 | rs1861402  | 64753358 | rs2422282  | 0.542 |
| 2 | 64753358 | rs2422282  | 64806767 | rs6736527  | 0.330 |
| 2 | 66410740 | rs2971826  | 66470568 | rs6546227  | 0.550 |
| 2 | 67578542 | rs10202108 | 67611284 | rs1607904  | 0.399 |
| 2 | 67625132 | rs6546313  | 67720046 | rs10490726 | 0.202 |
| 2 | 67941672 | rs11126163 | 67997099 | rs872108   | 0.217 |
| 2 | 70195079 | rs7597199  | 70214454 | rs4853334  | 0.380 |
| 2 | 70494258 | rs6546602  | 70517615 | rs516383   | 0.399 |
| 2 | 70517615 | rs516383   | 70517893 | rs2461861  | 0.255 |
| 2 | 70517893 | rs2461861  | 70552364 | rs1523305  | 0.219 |

|   |           |            |           |            |       |
|---|-----------|------------|-----------|------------|-------|
| 2 | 70718658  | rs11903352 | 70718791  | rs1859919  | 1.000 |
| 2 | 70718658  | rs11903352 | 70719422  | rs1859920  | 0.991 |
| 2 | 70718658  | rs11903352 | 70725313  | rs6713842  | 0.521 |
| 2 | 70718658  | rs11903352 | 70727597  | rs2108479  | 0.488 |
| 2 | 70718658  | rs11903352 | 70732192  | rs12617676 | 0.704 |
| 2 | 70718791  | rs1859919  | 70719422  | rs1859920  | 0.991 |
| 2 | 70718791  | rs1859919  | 70725313  | rs6713842  | 0.521 |
| 2 | 70718791  | rs1859919  | 70727597  | rs2108479  | 0.488 |
| 2 | 70718791  | rs1859919  | 70732192  | rs12617676 | 0.704 |
| 2 | 70719422  | rs1859920  | 70725313  | rs6713842  | 0.533 |
| 2 | 70719422  | rs1859920  | 70727597  | rs2108479  | 0.500 |
| 2 | 70719422  | rs1859920  | 70732192  | rs12617676 | 0.713 |
| 2 | 70725313  | rs6713842  | 70727597  | rs2108479  | 0.925 |
| 2 | 70725313  | rs6713842  | 70732192  | rs12617676 | 0.556 |
| 2 | 70727597  | rs2108479  | 70732192  | rs12617676 | 0.480 |
| 2 | 71534140  | rs6546693  | 71546325  | rs13431785 | 0.241 |
| 2 | 72031795  | rs908611   | 72041872  | rs6752766  | 0.418 |
| 2 | 74844393  | rs7574100  | 74865835  | rs6546923  | 0.773 |
| 2 | 75736164  | rs1049678  | 75746345  | rs3213670  | 0.402 |
| 2 | 76612596  | rs10193916 | 76615993  | rs1921254  | 0.897 |
| 2 | 80429338  | rs6711603  | 80471916  | rs13396392 | 0.650 |
| 2 | 81519665  | rs11887827 | 81544091  | rs12468325 | 1.000 |
| 2 | 81519665  | rs11887827 | 81626505  | rs6715049  | 0.961 |
| 2 | 81544091  | rs12468325 | 81626505  | rs6715049  | 0.961 |
| 2 | 82079119  | rs1521694  | 82081198  | rs909045   | 0.989 |
| 2 | 82905461  | rs17022516 | 82922840  | rs17022594 | 0.959 |
| 2 | 88399634  | rs1258410  | 88400714  | rs1258407  | 1.000 |
| 2 | 99252733  | rs1955393  | 99254889  | rs901596   | 1.000 |
| 2 | 99760452  | rs13419977 | 99762971  | rs6755935  | 0.979 |
| 2 | 100566861 | rs2970990  | 100567880 | rs2309846  | 0.595 |
| 2 | 102375786 | rs1420097  | 102375969 | rs4851004  | 0.992 |
| 2 | 102375786 | rs1420097  | 102377020 | rs2287034  | 0.430 |
| 2 | 102375969 | rs4851004  | 102377020 | rs2287034  | 0.434 |
| 2 | 105097181 | rs4266037  | 105097307 | rs4271787  | 0.969 |
| 2 | 108152299 | rs1563119  | 108230082 | rs9646947  | 0.779 |
| 2 | 112457764 | rs10180345 | 112486605 | rs11683409 | 0.682 |
| 2 | 113552819 | rs6759676  | 113553887 | rs7574787  | 0.203 |
| 2 | 113553887 | rs7574787  | 113565045 | rs4849152  | 0.291 |
| 2 | 118228304 | rs4848465  | 118235289 | rs7559497  | 0.384 |
| 2 | 118624828 | rs3849331  | 118644190 | rs11123476 | 0.259 |
| 2 | 118624828 | rs3849331  | 118663113 | rs4849683  | 0.269 |
| 2 | 118644190 | rs11123476 | 118663113 | rs4849683  | 0.893 |
| 2 | 119266362 | rs17006624 | 119298975 | rs17006964 | 0.220 |
| 2 | 121419389 | rs1466042  | 121767700 | rs753727   | 0.235 |

|   |           |            |           |            |       |
|---|-----------|------------|-----------|------------|-------|
| 2 | 121419389 | rs1466042  | 122198612 | rs7581005  | 0.244 |
| 2 | 121767700 | rs753727   | 122198612 | rs7581005  | 0.207 |
| 2 | 122316276 | rs10460462 | 122317772 | rs10460453 | 0.937 |
| 2 | 123023527 | rs2091427  | 123042613 | rs11122916 | 0.977 |
| 2 | 123023527 | rs2091427  | 123106758 | rs12474979 | 0.246 |
| 2 | 123042613 | rs11122916 | 123106758 | rs12474979 | 0.242 |
| 2 | 123168265 | rs893743   | 123188589 | rs12619304 | 0.694 |
| 2 | 123168265 | rs893743   | 123206763 | rs7607585  | 0.647 |
| 2 | 123168265 | rs893743   | 123206801 | rs17008553 | 0.647 |
| 2 | 123188589 | rs12619304 | 123206763 | rs7607585  | 0.936 |
| 2 | 123188589 | rs12619304 | 123206801 | rs17008553 | 0.936 |
| 2 | 123206763 | rs7607585  | 123206801 | rs17008553 | 1.000 |
| 2 | 123371606 | rs17008879 | 123379760 | rs1850585  | 0.340 |
| 2 | 123772494 | rs13009000 | 123825683 | rs993934   | 0.248 |
| 2 | 125766987 | rs41393446 | 125997677 | rs4849019  | 0.263 |
| 2 | 126681928 | rs17013415 | 126711318 | rs451639   | 0.312 |
| 2 | 126942871 | rs11695820 | 127000106 | rs10173017 | 0.365 |
| 2 | 129284172 | rs3856370  | 129485802 | rs17049013 | 0.274 |
| 2 | 129485802 | rs17049013 | 129560995 | rs1519446  | 0.222 |
| 2 | 131814612 | rs6430737  | 131874454 | rs941325   | 0.416 |
| 2 | 134303528 | rs7592519  | 134307196 | rs7607165  | 0.903 |
| 2 | 134397888 | rs10928469 | 134414690 | rs13409218 | 0.316 |
| 2 | 137057240 | rs16855680 | 137058414 | rs12691894 | 0.226 |
| 2 | 137685986 | rs6713475  | 137696788 | rs4610107  | 0.291 |
| 2 | 137685986 | rs6713475  | 137696948 | rs4954485  | 0.553 |
| 2 | 139627873 | rs17755242 | 139631252 | rs13029794 | 0.486 |
| 2 | 139627873 | rs17755242 | 139709212 | rs4954757  | 0.905 |
| 2 | 139631252 | rs13029794 | 139709212 | rs4954757  | 0.475 |
| 2 | 139842930 | rs344696   | 139920877 | rs10200212 | 0.368 |
| 2 | 139842930 | rs344696   | 139921301 | rs17712931 | 0.423 |
| 2 | 139842930 | rs344696   | 140141111 | rs2376454  | 0.201 |
| 2 | 139899653 | rs7604667  | 139920877 | rs10200212 | 0.258 |
| 2 | 139899653 | rs7604667  | 139921301 | rs17712931 | 0.211 |
| 2 | 139920877 | rs10200212 | 139921301 | rs17712931 | 0.866 |
| 2 | 139920877 | rs10200212 | 140141111 | rs2376454  | 0.364 |
| 2 | 139921301 | rs17712931 | 140141111 | rs2376454  | 0.403 |
| 2 | 141088732 | rs10209173 | 141099297 | rs547663   | 0.214 |
| 2 | 148393084 | rs7601098  | 148393603 | rs16828024 | 0.207 |
| 2 | 150216771 | rs1526285  | 150254854 | rs16827337 | 0.494 |
| 2 | 155957632 | rs10932484 | 155963884 | rs4664173  | 0.984 |
| 2 | 160772831 | rs7588696  | 160780790 | rs1350313  | 0.874 |
| 2 | 161849065 | rs1267031  | 161857779 | rs6720056  | 1.000 |
| 2 | 166694213 | rs490463   | 166695014 | rs17745411 | 0.491 |
| 2 | 166695014 | rs17745411 | 166728262 | rs4341952  | 0.232 |

|   |           |            |           |            |       |
|---|-----------|------------|-----------|------------|-------|
| 2 | 168928347 | rs2044958  | 168928396 | rs2044959  | 0.988 |
| 2 | 168928347 | rs2044958  | 168928713 | rs41342544 | 1.000 |
| 2 | 168928396 | rs2044959  | 168928713 | rs41342544 | 0.988 |
| 2 | 169538297 | rs2389605  | 169552855 | rs6759156  | 0.398 |
| 2 | 169538297 | rs2389605  | 169589746 | rs13430236 | 0.261 |
| 2 | 169552855 | rs6759156  | 169589746 | rs13430236 | 0.389 |
| 2 | 170833364 | rs3914752  | 170837608 | rs908782   | 0.265 |
| 2 | 173640508 | rs7573673  | 173673302 | rs6758859  | 0.562 |
| 2 | 173640508 | rs7573673  | 173800841 | rs16861393 | 0.273 |
| 2 | 174640083 | rs2044470  | 174682842 | rs10930638 | 0.211 |
| 2 | 174640083 | rs2044470  | 174688585 | rs17239377 | 0.210 |
| 2 | 174682842 | rs10930638 | 174688585 | rs17239377 | 0.974 |
| 2 | 175310212 | rs935866   | 175310260 | rs2123117  | 0.982 |
| 2 | 175310212 | rs935866   | 175349821 | rs2244340  | 0.389 |
| 2 | 175310260 | rs2123117  | 175349821 | rs2244340  | 0.377 |
| 2 | 177357008 | rs10177590 | 177364678 | rs2696970  | 0.958 |
| 2 | 180649047 | rs10497556 | 180653374 | rs16867176 | 0.975 |
| 2 | 181846802 | rs7566314  | 181883021 | rs17365432 | 0.818 |
| 2 | 181846802 | rs7566314  | 181897795 | rs1371619  | 0.396 |
| 2 | 181883021 | rs17365432 | 181897795 | rs1371619  | 0.509 |
| 2 | 181897795 | rs1371619  | 181950150 | rs959633   | 0.204 |
| 2 | 182165046 | rs16867450 | 182168626 | rs16867452 | 1.000 |
| 2 | 185991563 | rs17331619 | 186246637 | rs11693975 | 0.464 |
| 2 | 186360004 | rs1019429  | 186373677 | rs36004074 | 0.894 |
| 2 | 186360004 | rs1019429  | 186374069 | rs11695215 | 0.894 |
| 2 | 186360004 | rs1019429  | 186380157 | rs1862066  | 0.894 |
| 2 | 186373677 | rs36004074 | 186374069 | rs11695215 | 1.000 |
| 2 | 186373677 | rs36004074 | 186380157 | rs1862066  | 1.000 |
| 2 | 186374069 | rs11695215 | 186380157 | rs1862066  | 1.000 |
| 2 | 186629611 | rs10804002 | 186780020 | rs4461230  | 0.309 |
| 2 | 186629611 | rs10804002 | 187200987 | rs10174098 | 0.229 |
| 2 | 187397582 | rs7595459  | 187398066 | rs7598838  | 1.000 |
| 2 | 187397582 | rs7595459  | 187422167 | rs6726153  | 0.705 |
| 2 | 187398066 | rs7598838  | 187422167 | rs6726153  | 0.705 |
| 2 | 191253392 | rs2192008  | 191293520 | rs6434412  | 0.302 |
| 2 | 191253392 | rs2192008  | 191449442 | rs11687659 | 0.349 |
| 2 | 191293520 | rs6434412  | 191449442 | rs11687659 | 0.478 |
| 2 | 191293520 | rs6434412  | 191546449 | rs6718902  | 0.399 |
| 2 | 191449442 | rs11687659 | 191546449 | rs6718902  | 0.321 |
| 2 | 196192437 | rs1554168  | 196288141 | rs16842044 | 0.306 |
| 2 | 196983848 | rs7593761  | 197007679 | rs7590951  | 0.701 |
| 2 | 197158863 | rs10167169 | 197194201 | rs7572953  | 0.414 |
| 2 | 199583342 | rs1598656  | 199776297 | rs10804088 | 0.377 |
| 2 | 202288513 | rs10469756 | 202305680 | rs12470229 | 0.847 |

|   |           |            |           |            |       |
|---|-----------|------------|-----------|------------|-------|
| 2 | 205795364 | rs1921797  | 205795592 | rs6758662  | 0.378 |
| 2 | 205795364 | rs1921797  | 205796347 | rs10206071 | 0.378 |
| 2 | 205795364 | rs1921797  | 205804065 | rs7593566  | 0.335 |
| 2 | 205795592 | rs6758662  | 205796347 | rs10206071 | 1.000 |
| 2 | 205795592 | rs6758662  | 205804065 | rs7593566  | 0.870 |
| 2 | 205796347 | rs10206071 | 205804065 | rs7593566  | 0.870 |
| 2 | 207445996 | rs12694063 | 207493189 | rs2078     | 0.820 |
| 2 | 207448975 | rs1031432  | 207493189 | rs2078     | 0.211 |
| 2 | 208561544 | rs10497890 | 208637557 | rs10932231 | 0.249 |
| 2 | 214343577 | rs2457183  | 214380536 | rs11893486 | 0.573 |
| 2 | 214343577 | rs2457183  | 214391459 | rs1582839  | 0.223 |
| 2 | 214343577 | rs2457183  | 214423220 | rs4503943  | 0.575 |
| 2 | 214380536 | rs11893486 | 214423220 | rs4503943  | 0.933 |
| 2 | 217965888 | rs6435981  | 217990872 | rs2113828  | 0.885 |
| 2 | 222640734 | rs348984   | 222680987 | rs6436292  | 0.424 |
| 2 | 222640734 | rs348984   | 222686533 | rs2053319  | 0.399 |
| 2 | 222680987 | rs6436292  | 222686533 | rs2053319  | 0.932 |
| 2 | 226613705 | rs12621261 | 226630137 | rs11684232 | 0.988 |
| 2 | 226613705 | rs12621261 | 226641531 | rs4673157  | 0.965 |
| 2 | 226630137 | rs11684232 | 226641531 | rs4673157  | 0.953 |
| 2 | 227182674 | rs1273810  | 227186131 | rs1273812  | 1.000 |
| 2 | 227182674 | rs1273810  | 227206764 | rs12621407 | 0.837 |
| 2 | 227182674 | rs1273810  | 227211369 | rs2396385  | 0.714 |
| 2 | 227182674 | rs1273810  | 227224085 | rs1882579  | 0.714 |
| 2 | 227182674 | rs1273810  | 227226692 | rs1882580  | 0.714 |
| 2 | 227186131 | rs1273812  | 227206764 | rs12621407 | 0.837 |
| 2 | 227186131 | rs1273812  | 227211369 | rs2396385  | 0.714 |
| 2 | 227186131 | rs1273812  | 227224085 | rs1882579  | 0.714 |
| 2 | 227186131 | rs1273812  | 227226692 | rs1882580  | 0.714 |
| 2 | 227206764 | rs12621407 | 227211369 | rs2396385  | 0.891 |
| 2 | 227206764 | rs12621407 | 227224085 | rs1882579  | 0.891 |
| 2 | 227206764 | rs12621407 | 227226692 | rs1882580  | 0.891 |
| 2 | 227211369 | rs2396385  | 227224085 | rs1882579  | 1.000 |
| 2 | 227211369 | rs2396385  | 227226692 | rs1882580  | 1.000 |
| 2 | 227214712 | rs17198764 | 227234630 | rs2178707  | 0.908 |
| 2 | 227224085 | rs1882579  | 227226692 | rs1882580  | 1.000 |
| 2 | 229093994 | rs996682   | 229098461 | rs975519   | 0.937 |
| 2 | 229093994 | rs996682   | 229102479 | rs9288635  | 0.887 |
| 2 | 229093994 | rs996682   | 229124541 | rs918896   | 0.480 |
| 2 | 229093994 | rs996682   | 229139165 | rs1435850  | 0.739 |
| 2 | 229093994 | rs996682   | 229166212 | rs41330849 | 0.459 |
| 2 | 229098461 | rs975519   | 229102479 | rs9288635  | 0.968 |
| 2 | 229098461 | rs975519   | 229124541 | rs918896   | 0.425 |
| 2 | 229098461 | rs975519   | 229139165 | rs1435850  | 0.824 |

|   |           |            |           |            |       |
|---|-----------|------------|-----------|------------|-------|
| 2 | 229098461 | rs975519   | 229166212 | rs41330849 | 0.418 |
| 2 | 229102479 | rs9288635  | 229124541 | rs918896   | 0.400 |
| 2 | 229102479 | rs9288635  | 229139165 | rs1435850  | 0.868 |
| 2 | 229102479 | rs9288635  | 229166212 | rs41330849 | 0.392 |
| 2 | 229124541 | rs918896   | 229139165 | rs1435850  | 0.305 |
| 2 | 229124541 | rs918896   | 229166212 | rs41330849 | 0.852 |
| 2 | 229139165 | rs1435850  | 229166212 | rs41330849 | 0.386 |
| 2 | 230304596 | rs12468084 | 230461208 | rs546530   | 0.839 |
| 2 | 230304596 | rs12468084 | 230528844 | rs6757156  | 0.352 |
| 2 | 230461208 | rs546530   | 230528844 | rs6757156  | 0.408 |
| 2 | 230734072 | rs16826767 | 230734362 | rs6755898  | 0.910 |
| 2 | 232857983 | rs11901692 | 232867061 | rs6746834  | 0.913 |
| 2 | 233080644 | rs1881495  | 233126885 | rs3791725  | 0.402 |
| 2 | 233578610 | rs1104953  | 233580344 | rs10193545 | 0.289 |
| 2 | 235229041 | rs6715142  | 235230882 | rs11687004 | 0.854 |
| 2 | 235229041 | rs6715142  | 235252279 | rs4663470  | 0.559 |
| 2 | 235230882 | rs11687004 | 235252279 | rs4663470  | 0.457 |
| 2 | 238132139 | rs2875729  | 238157857 | rs6431547  | 0.252 |
| 2 | 238898471 | rs4663304  | 239138174 | rs4663907  | 0.295 |
| 2 | 239180160 | rs12619578 | 239233691 | rs1397328  | 0.383 |
| 2 | 239180160 | rs12619578 | 239252712 | rs7558129  | 0.321 |
| 2 | 239233691 | rs1397328  | 239252712 | rs7558129  | 0.931 |
| 2 | 240888050 | rs7607116  | 240891998 | rs12474682 | 0.688 |
| 2 | 241242617 | rs2060188  | 241243318 | rs10933628 | 1.000 |
| 3 | 853511    | rs12495737 | 883745    | rs12637032 | 0.563 |
| 3 | 7595382   | rs7614915  | 7595828   | rs1485174  | 0.987 |
| 3 | 8455539   | rs1695564  | 8465918   | rs358270   | 0.757 |
| 3 | 8455539   | rs1695564  | 8467724   | rs358267   | 0.758 |
| 3 | 8455539   | rs1695564  | 8469627   | rs1038483  | 0.564 |
| 3 | 8455539   | rs1695564  | 8519420   | rs9861544  | 0.267 |
| 3 | 8455539   | rs1695564  | 8533515   | rs4143966  | 0.337 |
| 3 | 8455539   | rs1695564  | 8537637   | rs1947220  | 0.312 |
| 3 | 8455539   | rs1695564  | 8543956   | rs1493588  | 0.230 |
| 3 | 8465918   | rs358270   | 8467724   | rs358267   | 0.981 |
| 3 | 8465918   | rs358270   | 8469627   | rs1038483  | 0.753 |
| 3 | 8465918   | rs358270   | 8533515   | rs4143966  | 0.242 |
| 3 | 8465918   | rs358270   | 8537637   | rs1947220  | 0.222 |
| 3 | 8465918   | rs358270   | 8543956   | rs1493588  | 0.201 |
| 3 | 8465918   | rs358270   | 8545874   | rs9810512  | 0.210 |
| 3 | 8467724   | rs358267   | 8469627   | rs1038483  | 0.748 |
| 3 | 8467724   | rs358267   | 8519420   | rs9861544  | 0.206 |
| 3 | 8467724   | rs358267   | 8533515   | rs4143966  | 0.249 |
| 3 | 8467724   | rs358267   | 8537637   | rs1947220  | 0.229 |
| 3 | 8467724   | rs358267   | 8543956   | rs1493588  | 0.204 |

|   |          |            |          |            |       |
|---|----------|------------|----------|------------|-------|
| 3 | 8467724  | rs358267   | 8545874  | rs9810512  | 0.213 |
| 3 | 8469627  | rs1038483  | 8519420  | rs9861544  | 0.266 |
| 3 | 8469627  | rs1038483  | 8533515  | rs4143966  | 0.305 |
| 3 | 8469627  | rs1038483  | 8537637  | rs1947220  | 0.288 |
| 3 | 8469627  | rs1038483  | 8543956  | rs1493588  | 0.270 |
| 3 | 8469627  | rs1038483  | 8545874  | rs9810512  | 0.280 |
| 3 | 8519420  | rs9861544  | 8524665  | rs1994876  | 0.321 |
| 3 | 8519420  | rs9861544  | 8533515  | rs4143966  | 0.472 |
| 3 | 8519420  | rs9861544  | 8537637  | rs1947220  | 0.455 |
| 3 | 8519420  | rs9861544  | 8543956  | rs1493588  | 0.401 |
| 3 | 8519420  | rs9861544  | 8545874  | rs9810512  | 0.410 |
| 3 | 8524665  | rs1994876  | 8533515  | rs4143966  | 0.498 |
| 3 | 8524665  | rs1994876  | 8537637  | rs1947220  | 0.474 |
| 3 | 8524665  | rs1994876  | 8543956  | rs1493588  | 0.630 |
| 3 | 8524665  | rs1994876  | 8545874  | rs9810512  | 0.617 |
| 3 | 8533515  | rs4143966  | 8537637  | rs1947220  | 0.936 |
| 3 | 8533515  | rs4143966  | 8543956  | rs1493588  | 0.757 |
| 3 | 8533515  | rs4143966  | 8545874  | rs9810512  | 0.781 |
| 3 | 8537637  | rs1947220  | 8543956  | rs1493588  | 0.774 |
| 3 | 8537637  | rs1947220  | 8545874  | rs9810512  | 0.798 |
| 3 | 8543956  | rs1493588  | 8545874  | rs9810512  | 0.980 |
| 3 | 8614568  | rs371734   | 8620740  | rs9878735  | 0.419 |
| 3 | 9016299  | rs486012   | 9021906  | rs341795   | 0.932 |
| 3 | 9016299  | rs486012   | 9025659  | rs341788   | 0.423 |
| 3 | 9021906  | rs341795   | 9025659  | rs341788   | 0.415 |
| 3 | 9098116  | rs2669986  | 9111060  | rs531719   | 0.684 |
| 3 | 9677755  | rs6809387  | 9711452  | rs12490544 | 0.583 |
| 3 | 13882158 | rs6442417  | 14159670 | rs8516     | 0.224 |
| 3 | 16164025 | rs10510446 | 16168521 | rs2657589  | 0.972 |
| 3 | 17311423 | rs283907   | 17477922 | rs7644389  | 0.895 |
| 3 | 19019071 | rs7433351  | 19022444 | rs7433126  | 1.000 |
| 3 | 19019071 | rs7433351  | 19025360 | rs6550864  | 0.809 |
| 3 | 19019071 | rs7433351  | 19025817 | rs7638224  | 0.986 |
| 3 | 19019071 | rs7433351  | 19058788 | rs9681366  | 0.844 |
| 3 | 19019071 | rs7433351  | 19066516 | rs13090408 | 0.804 |
| 3 | 19019071 | rs7433351  | 19092122 | rs7612947  | 0.920 |
| 3 | 19022444 | rs7433126  | 19025360 | rs6550864  | 0.809 |
| 3 | 19022444 | rs7433126  | 19025817 | rs7638224  | 0.986 |
| 3 | 19022444 | rs7433126  | 19058788 | rs9681366  | 0.844 |
| 3 | 19022444 | rs7433126  | 19066516 | rs13090408 | 0.804 |
| 3 | 19022444 | rs7433126  | 19092122 | rs7612947  | 0.920 |
| 3 | 19025360 | rs6550864  | 19025817 | rs7638224  | 0.820 |
| 3 | 19025360 | rs6550864  | 19058788 | rs9681366  | 0.956 |
| 3 | 19025360 | rs6550864  | 19066516 | rs13090408 | 0.912 |



|   |          |            |          |            |       |
|---|----------|------------|----------|------------|-------|
| 3 | 19025360 | rs6550864  | 19092122 | rs7612947  | 0.779 |
| 3 | 19025817 | rs7638224  | 19058788 | rs9681366  | 0.856 |
| 3 | 19025817 | rs7638224  | 19066516 | rs13090408 | 0.815 |
| 3 | 19025817 | rs7638224  | 19092122 | rs7612947  | 0.933 |
| 3 | 19058788 | rs9681366  | 19066516 | rs13090408 | 0.956 |
| 3 | 19058788 | rs9681366  | 19092122 | rs7612947  | 0.841 |
| 3 | 19066516 | rs13090408 | 19092122 | rs7612947  | 0.853 |
| 3 | 20440212 | rs6793327  | 20499811 | rs679267   | 0.217 |
| 3 | 22275887 | rs2728988  | 22309107 | rs1491881  | 0.344 |
| 3 | 25450886 | rs4681024  | 25450928 | rs4681025  | 1.000 |
| 3 | 30970990 | rs1494741  | 31002768 | rs6772140  | 0.557 |
| 3 | 33545331 | rs9817055  | 33780565 | rs9311026  | 0.373 |
| 3 | 34915736 | rs885314   | 34950049 | rs11129626 | 0.929 |
| 3 | 34915736 | rs885314   | 35052013 | rs17032625 | 0.340 |
| 3 | 34950049 | rs11129626 | 35052013 | rs17032625 | 0.381 |
| 3 | 36652151 | rs999745   | 36656030 | rs5009838  | 0.272 |
| 3 | 36652151 | rs999745   | 36656248 | rs11710386 | 0.573 |
| 3 | 36656030 | rs5009838  | 36656248 | rs11710386 | 0.471 |
| 3 | 38103093 | rs17037369 | 38119879 | rs6599263  | 0.540 |
| 3 | 38160178 | rs6767684  | 38287376 | rs3805040  | 0.344 |
| 3 | 38734720 | rs9311196  | 38764283 | rs12491593 | 0.762 |
| 3 | 40160639 | rs4132209  | 40170210 | rs2679807  | 0.565 |
| 3 | 45971505 | rs4388012  | 46099422 | rs17215981 | 0.916 |
| 3 | 46241730 | rs11919943 | 46479320 | rs9862388  | 0.218 |
| 3 | 47842731 | rs3772399  | 47859957 | rs319694   | 0.921 |
| 3 | 48299470 | rs9837228  | 48345773 | rs13090538 | 0.711 |
| 3 | 54364155 | rs1530733  | 54459140 | rs6445664  | 0.371 |
| 3 | 54431818 | rs9817603  | 54459140 | rs6445664  | 0.312 |
| 3 | 54916481 | rs9808962  | 54916618 | rs1918070  | 1.000 |
| 3 | 54946579 | rs2048805  | 54962963 | rs3821659  | 0.834 |
| 3 | 55671242 | rs2702139  | 55685495 | rs815416   | 0.467 |
| 3 | 56116883 | rs7647972  | 56233367 | rs1452220  | 0.729 |
| 3 | 56116883 | rs7647972  | 56245378 | rs9873480  | 0.526 |
| 3 | 56123924 | rs9874662  | 56129715 | rs17056472 | 0.700 |
| 3 | 56123924 | rs9874662  | 56130461 | rs7625422  | 0.669 |
| 3 | 56129715 | rs17056472 | 56130461 | rs7625422  | 0.923 |
| 3 | 56233367 | rs1452220  | 56245378 | rs9873480  | 0.760 |
| 3 | 58136814 | rs2178773  | 58171883 | rs6807301  | 0.388 |
| 3 | 62187107 | rs4072198  | 62256476 | rs2242352  | 0.251 |
| 3 | 62187107 | rs4072198  | 62279360 | rs9883112  | 0.345 |
| 3 | 62256476 | rs2242352  | 62279360 | rs9883112  | 0.492 |
| 3 | 63260778 | rs11130920 | 63282908 | rs1451312  | 0.858 |
| 3 | 63260778 | rs11130920 | 63306518 | rs13061130 | 0.208 |
| 3 | 63282908 | rs1451312  | 63306518 | rs13061130 | 0.247 |

|   |          |            |          |            |       |
|---|----------|------------|----------|------------|-------|
| 3 | 63538798 | rs6785893  | 63542394 | rs17399554 | 0.266 |
| 3 | 64483477 | rs10470705 | 64510911 | rs7642335  | 0.484 |
| 3 | 64510911 | rs7642335  | 65307422 | rs9854952  | 0.211 |
| 3 | 65163493 | rs988487   | 65172526 | rs2371864  | 0.375 |
| 3 | 65401481 | rs6762815  | 65415821 | rs4375986  | 0.569 |
| 3 | 65401481 | rs6762815  | 65493500 | rs13077233 | 0.388 |
| 3 | 65415821 | rs4375986  | 65493500 | rs13077233 | 0.541 |
| 3 | 65576699 | rs7612634  | 65576717 | rs7612636  | 1.000 |
| 3 | 65576699 | rs7612634  | 65576735 | rs7612644  | 1.000 |
| 3 | 65576717 | rs7612636  | 65576735 | rs7612644  | 1.000 |
| 3 | 65785954 | rs1495448  | 65804384 | rs10510947 | 0.795 |
| 3 | 68923672 | rs876535   | 68940970 | rs4855516  | 0.766 |
| 3 | 68923672 | rs876535   | 68952118 | rs2130439  | 0.425 |
| 3 | 68923672 | rs876535   | 68956675 | rs10470577 | 0.351 |
| 3 | 68940970 | rs4855516  | 68952118 | rs2130439  | 0.437 |
| 3 | 68940970 | rs4855516  | 68956675 | rs10470577 | 0.371 |
| 3 | 68952118 | rs2130439  | 68956675 | rs10470577 | 0.568 |
| 3 | 71555237 | rs7630905  | 71556906 | rs17656368 | 0.777 |
| 3 | 72065199 | rs4552321  | 72065251 | rs4345037  | 1.000 |
| 3 | 72587344 | rs2118592  | 72599055 | rs934840   | 0.266 |
| 3 | 75043354 | rs9828888  | 75072673 | rs4420916  | 0.735 |
| 3 | 75043354 | rs9828888  | 75173405 | rs6785246  | 0.760 |
| 3 | 75043354 | rs9828888  | 75180559 | rs4635750  | 0.598 |
| 3 | 75043354 | rs9828888  | 75277146 | rs6549701  | 0.682 |
| 3 | 75043354 | rs9828888  | 75285062 | rs9877751  | 0.521 |
| 3 | 75043354 | rs9828888  | 75332099 | rs13083349 | 0.531 |
| 3 | 75043354 | rs9828888  | 75352178 | rs4072316  | 0.268 |
| 3 | 75072673 | rs4420916  | 75173405 | rs6785246  | 0.568 |
| 3 | 75072673 | rs4420916  | 75180559 | rs4635750  | 0.791 |
| 3 | 75072673 | rs4420916  | 75277146 | rs6549701  | 0.445 |
| 3 | 75072673 | rs4420916  | 75285062 | rs9877751  | 0.673 |
| 3 | 75072673 | rs4420916  | 75332099 | rs13083349 | 0.370 |
| 3 | 75072673 | rs4420916  | 75352178 | rs4072316  | 0.363 |
| 3 | 75173405 | rs6785246  | 75180559 | rs4635750  | 0.509 |
| 3 | 75173405 | rs6785246  | 75277146 | rs6549701  | 0.838 |
| 3 | 75173405 | rs6785246  | 75285062 | rs9877751  | 0.502 |
| 3 | 75173405 | rs6785246  | 75332099 | rs13083349 | 0.628 |
| 3 | 75180559 | rs4635750  | 75277146 | rs6549701  | 0.499 |
| 3 | 75180559 | rs4635750  | 75285062 | rs9877751  | 0.838 |
| 3 | 75180559 | rs4635750  | 75332099 | rs13083349 | 0.382 |
| 3 | 75180559 | rs4635750  | 75352178 | rs4072316  | 0.455 |
| 3 | 75277146 | rs6549701  | 75285062 | rs9877751  | 0.635 |
| 3 | 75277146 | rs6549701  | 75332099 | rs13083349 | 0.723 |
| 3 | 75277146 | rs6549701  | 75352178 | rs4072316  | 0.254 |

|   |           |            |           |            |       |
|---|-----------|------------|-----------|------------|-------|
| 3 | 75285062  | rs9877751  | 75332099  | rs13083349 | 0.463 |
| 3 | 75285062  | rs9877751  | 75352178  | rs4072316  | 0.498 |
| 3 | 75332099  | rs13083349 | 75352178  | rs4072316  | 0.370 |
| 3 | 77388581  | rs9876344  | 77405024  | rs9882239  | 0.391 |
| 3 | 80553686  | rs9883980  | 80682502  | rs7431461  | 0.657 |
| 3 | 80677712  | rs1406781  | 80887895  | rs6786939  | 0.692 |
| 3 | 80887895  | rs6786939  | 81235306  | rs2578318  | 0.232 |
| 3 | 81212634  | rs17018482 | 81235306  | rs2578318  | 0.230 |
| 3 | 81859450  | rs3772891  | 81935613  | rs1464790  | 0.541 |
| 3 | 81859450  | rs3772891  | 81974721  | rs1524557  | 0.489 |
| 3 | 81859450  | rs3772891  | 81976619  | rs1464791  | 0.330 |
| 3 | 81859450  | rs3772891  | 82034150  | rs7621968  | 0.325 |
| 3 | 81935613  | rs1464790  | 81974721  | rs1524557  | 0.863 |
| 3 | 81935613  | rs1464790  | 81976619  | rs1464791  | 0.641 |
| 3 | 81935613  | rs1464790  | 82034150  | rs7621968  | 0.511 |
| 3 | 81974721  | rs1524557  | 81976619  | rs1464791  | 0.741 |
| 3 | 81974721  | rs1524557  | 82034150  | rs7621968  | 0.570 |
| 3 | 81976619  | rs1464791  | 82034150  | rs7621968  | 0.726 |
| 3 | 85922061  | rs9836755  | 86250563  | rs13093396 | 0.231 |
| 3 | 89953636  | rs7634358  | 89987959  | rs7633240  | 0.984 |
| 3 | 89953636  | rs7634358  | 90034988  | rs12106694 | 0.984 |
| 3 | 89987959  | rs7633240  | 90034988  | rs12106694 | 1.000 |
| 3 | 95031169  | rs9289536  | 95073766  | rs9713061  | 0.973 |
| 3 | 96692513  | rs11919338 | 96693865  | rs4574293  | 0.521 |
| 3 | 96692513  | rs11919338 | 96760311  | rs6787987  | 0.479 |
| 3 | 96692513  | rs11919338 | 96817623  | rs6803348  | 0.441 |
| 3 | 96693865  | rs4574293  | 96760311  | rs6787987  | 0.922 |
| 3 | 97625924  | rs9874467  | 97643917  | rs326296   | 0.870 |
| 3 | 100902882 | rs1610265  | 100962239 | rs4928220  | 0.713 |
| 3 | 100902882 | rs1610265  | 101163597 | rs6792339  | 0.771 |
| 3 | 100962239 | rs4928220  | 101163597 | rs6792339  | 0.874 |
| 3 | 103451607 | rs11720464 | 103456100 | rs16844885 | 0.986 |
| 3 | 105899251 | rs9841288  | 105901394 | rs2633702  | 0.392 |
| 3 | 106825705 | rs4894936  | 106828663 | rs2083948  | 0.230 |
| 3 | 107371754 | rs9872358  | 107385166 | rs1871274  | 0.903 |
| 3 | 107371754 | rs9872358  | 107415425 | rs13085623 | 0.388 |
| 3 | 107372793 | rs7632189  | 107504190 | rs7614488  | 0.215 |
| 3 | 107385166 | rs1871274  | 107415425 | rs13085623 | 0.433 |
| 3 | 108005925 | rs4895039  | 108010714 | rs2049118  | 0.858 |
| 3 | 108005925 | rs4895039  | 108011334 | rs1520717  | 0.583 |
| 3 | 108010714 | rs2049118  | 108011334 | rs1520717  | 0.672 |
| 3 | 110180266 | rs2715734  | 110198158 | rs7637739  | 0.764 |
| 3 | 110771783 | rs1533855  | 110782976 | rs1729595  | 0.829 |
| 3 | 110771783 | rs1533855  | 110783010 | rs1729594  | 0.805 |

|   |           |            |           |            |       |
|---|-----------|------------|-----------|------------|-------|
| 3 | 110771783 | rs1533855  | 110785471 | rs1729590  | 0.813 |
| 3 | 110771783 | rs1533855  | 110807269 | rs1729622  | 0.591 |
| 3 | 110771783 | rs1533855  | 110814933 | rs1729616  | 0.591 |
| 3 | 110782976 | rs1729595  | 110783010 | rs1729594  | 0.971 |
| 3 | 110782976 | rs1729595  | 110785471 | rs1729590  | 0.990 |
| 3 | 110782976 | rs1729595  | 110807269 | rs1729622  | 0.727 |
| 3 | 110782976 | rs1729595  | 110814933 | rs1729616  | 0.727 |
| 3 | 110783010 | rs1729594  | 110785471 | rs1729590  | 0.981 |
| 3 | 110783010 | rs1729594  | 110807269 | rs1729622  | 0.720 |
| 3 | 110783010 | rs1729594  | 110814933 | rs1729616  | 0.720 |
| 3 | 110785471 | rs1729590  | 110807269 | rs1729622  | 0.713 |
| 3 | 110785471 | rs1729590  | 110814933 | rs1729616  | 0.713 |
| 3 | 110807269 | rs1729622  | 110814933 | rs1729616  | 1.000 |
| 3 | 112471474 | rs16857885 | 112486553 | rs13083225 | 0.577 |
| 3 | 112485064 | rs1489024  | 112486553 | rs13083225 | 0.246 |
| 3 | 113083848 | rs17490973 | 113193088 | rs17429033 | 0.612 |
| 3 | 113411650 | rs13069887 | 113422075 | rs4347976  | 0.272 |
| 3 | 120022936 | rs12629898 | 120082765 | rs962115   | 0.445 |
| 3 | 120986830 | rs11712211 | 120989570 | rs1403527  | 1.000 |
| 3 | 122016954 | rs556346   | 122018119 | rs936849   | 0.352 |
| 3 | 124219868 | rs7629297  | 124236663 | rs1123613  | 0.532 |
| 3 | 124356613 | rs2717225  | 124419559 | rs9868971  | 0.213 |
| 3 | 124356613 | rs2717225  | 124447590 | rs12493729 | 0.201 |
| 3 | 124419559 | rs9868971  | 124447590 | rs12493729 | 0.985 |
| 3 | 125622819 | rs6787049  | 125639321 | rs963651   | 0.984 |
| 3 | 126184698 | rs6763492  | 126204193 | rs6795558  | 0.727 |
| 3 | 126659411 | rs7636858  | 126675824 | rs7610077  | 0.529 |
| 3 | 127647472 | rs777491   | 127669194 | rs777496   | 0.799 |
| 3 | 129358064 | rs11716941 | 129429478 | rs9830294  | 0.440 |
| 3 | 129358064 | rs11716941 | 129476313 | rs2999061  | 0.928 |
| 3 | 129429478 | rs9830294  | 129476313 | rs2999061  | 0.485 |
| 3 | 132237816 | rs903046   | 132263544 | rs6794179  | 1.000 |
| 3 | 132237816 | rs903046   | 132313061 | rs16835887 | 0.976 |
| 3 | 132237816 | rs903046   | 132342177 | rs1515909  | 0.964 |
| 3 | 132237816 | rs903046   | 132346904 | rs2718860  | 0.964 |
| 3 | 132237816 | rs903046   | 132350485 | rs6439277  | 0.952 |
| 3 | 132263544 | rs6794179  | 132313061 | rs16835887 | 0.976 |
| 3 | 132263544 | rs6794179  | 132342177 | rs1515909  | 0.964 |
| 3 | 132263544 | rs6794179  | 132346904 | rs2718860  | 0.964 |
| 3 | 132263544 | rs6794179  | 132350485 | rs6439277  | 0.952 |
| 3 | 132267796 | rs1389271  | 132303784 | rs13094108 | 0.891 |
| 3 | 132267796 | rs1389271  | 132338545 | rs925779   | 0.715 |
| 3 | 132303784 | rs13094108 | 132338545 | rs925779   | 0.810 |
| 3 | 132313061 | rs16835887 | 132342177 | rs1515909  | 0.988 |

|   |           |            |           |            |       |
|---|-----------|------------|-----------|------------|-------|
| 3 | 132313061 | rs16835887 | 132346904 | rs2718860  | 0.988 |
| 3 | 132313061 | rs16835887 | 132350485 | rs6439277  | 0.976 |
| 3 | 132342177 | rs1515909  | 132346904 | rs2718860  | 1.000 |
| 3 | 132342177 | rs1515909  | 132350485 | rs6439277  | 0.988 |
| 3 | 132346904 | rs2718860  | 132350485 | rs6439277  | 0.988 |
| 3 | 132430699 | rs10512802 | 132474804 | rs16836261 | 0.223 |
| 3 | 132430699 | rs10512802 | 132564794 | rs16836493 | 0.250 |
| 3 | 132474804 | rs16836261 | 132557020 | rs1427835  | 0.806 |
| 3 | 132474804 | rs16836261 | 132564794 | rs16836493 | 0.554 |
| 3 | 132557020 | rs1427835  | 132564794 | rs16836493 | 0.720 |
| 3 | 132564794 | rs16836493 | 133172286 | rs1381083  | 0.211 |
| 3 | 134157013 | rs17431810 | 134207602 | rs9873398  | 0.208 |
| 3 | 134157013 | rs17431810 | 134208053 | rs1013391  | 0.331 |
| 3 | 134157013 | rs17431810 | 134208565 | rs6763815  | 0.208 |
| 3 | 134157013 | rs17431810 | 134219072 | rs6439381  | 0.324 |
| 3 | 134157013 | rs17431810 | 134227201 | rs2369967  | 0.444 |
| 3 | 134157013 | rs17431810 | 134234389 | rs1464403  | 0.313 |
| 3 | 134157013 | rs17431810 | 134238872 | rs7633217  | 0.433 |
| 3 | 134157013 | rs17431810 | 134243117 | rs1568478  | 0.287 |
| 3 | 134188001 | rs9824252  | 134207602 | rs9873398  | 0.957 |
| 3 | 134188001 | rs9824252  | 134208053 | rs1013391  | 0.704 |
| 3 | 134188001 | rs9824252  | 134208565 | rs6763815  | 0.957 |
| 3 | 134188001 | rs9824252  | 134219072 | rs6439381  | 0.707 |
| 3 | 134188001 | rs9824252  | 134227201 | rs2369967  | 0.333 |
| 3 | 134188001 | rs9824252  | 134234389 | rs1464403  | 0.679 |
| 3 | 134188001 | rs9824252  | 134238872 | rs7633217  | 0.331 |
| 3 | 134188001 | rs9824252  | 134243117 | rs1568478  | 0.579 |
| 3 | 134188001 | rs9824252  | 134245860 | rs4854680  | 0.536 |
| 3 | 134207602 | rs9873398  | 134208053 | rs1013391  | 0.755 |
| 3 | 134207602 | rs9873398  | 134208565 | rs6763815  | 1.000 |
| 3 | 134207602 | rs9873398  | 134219072 | rs6439381  | 0.757 |
| 3 | 134207602 | rs9873398  | 134227201 | rs2369967  | 0.373 |
| 3 | 134207602 | rs9873398  | 134234389 | rs1464403  | 0.731 |
| 3 | 134207602 | rs9873398  | 134238872 | rs7633217  | 0.370 |
| 3 | 134207602 | rs9873398  | 134243117 | rs1568478  | 0.629 |
| 3 | 134207602 | rs9873398  | 134245860 | rs4854680  | 0.587 |
| 3 | 134207602 | rs9873398  | 134250282 | rs7631593  | 0.317 |
| 3 | 134208053 | rs1013391  | 134208565 | rs6763815  | 0.755 |
| 3 | 134208053 | rs1013391  | 134219072 | rs6439381  | 1.000 |
| 3 | 134208053 | rs1013391  | 134227201 | rs2369967  | 0.528 |
| 3 | 134208053 | rs1013391  | 134234389 | rs1464403  | 0.968 |
| 3 | 134208053 | rs1013391  | 134238872 | rs7633217  | 0.521 |
| 3 | 134208053 | rs1013391  | 134243117 | rs1568478  | 0.833 |
| 3 | 134208053 | rs1013391  | 134245860 | rs4854680  | 0.808 |

|   |           |           |           |           |       |
|---|-----------|-----------|-----------|-----------|-------|
| 3 | 134208053 | rs1013391 | 134250282 | rs7631593 | 0.469 |
| 3 | 134208053 | rs1013391 | 134259591 | rs2049149 | 0.596 |
| 3 | 134208565 | rs6763815 | 134219072 | rs6439381 | 0.757 |
| 3 | 134208565 | rs6763815 | 134227201 | rs2369967 | 0.373 |
| 3 | 134208565 | rs6763815 | 134234389 | rs1464403 | 0.731 |
| 3 | 134208565 | rs6763815 | 134238872 | rs7633217 | 0.370 |
| 3 | 134208565 | rs6763815 | 134243117 | rs1568478 | 0.629 |
| 3 | 134208565 | rs6763815 | 134245860 | rs4854680 | 0.587 |
| 3 | 134208565 | rs6763815 | 134250282 | rs7631593 | 0.317 |
| 3 | 134208565 | rs6763815 | 134259591 | rs2049149 | 0.822 |
| 3 | 134208565 | rs6763815 | 134273376 | rs4496483 | 0.784 |
| 3 | 134219072 | rs6439381 | 134227201 | rs2369967 | 0.530 |
| 3 | 134219072 | rs6439381 | 134234389 | rs1464403 | 0.968 |
| 3 | 134219072 | rs6439381 | 134238872 | rs7633217 | 0.524 |
| 3 | 134219072 | rs6439381 | 134243117 | rs1568478 | 0.834 |
| 3 | 134219072 | rs6439381 | 134245860 | rs4854680 | 0.810 |
| 3 | 134219072 | rs6439381 | 134250282 | rs7631593 | 0.471 |
| 3 | 134219072 | rs6439381 | 134259591 | rs2049149 | 0.601 |
| 3 | 134219072 | rs6439381 | 134273376 | rs4496483 | 0.626 |
| 3 | 134219072 | rs6439381 | 134280489 | rs2369970 | 0.208 |
| 3 | 134227201 | rs2369967 | 134234389 | rs1464403 | 0.531 |
| 3 | 134227201 | rs2369967 | 134238872 | rs7633217 | 0.983 |
| 3 | 134227201 | rs2369967 | 134243117 | rs1568478 | 0.579 |
| 3 | 134227201 | rs2369967 | 134245860 | rs4854680 | 0.588 |
| 3 | 134227201 | rs2369967 | 134250282 | rs7631593 | 0.841 |
| 3 | 134227201 | rs2369967 | 134259591 | rs2049149 | 0.356 |
| 3 | 134227201 | rs2369967 | 134273376 | rs4496483 | 0.283 |
| 3 | 134227201 | rs2369967 | 134280489 | rs2369970 | 0.529 |
| 3 | 134234389 | rs1464403 | 134238872 | rs7633217 | 0.537 |
| 3 | 134234389 | rs1464403 | 134243117 | rs1568478 | 0.861 |
| 3 | 134234389 | rs1464403 | 134245860 | rs4854680 | 0.835 |
| 3 | 134234389 | rs1464403 | 134250282 | rs7631593 | 0.482 |
| 3 | 134234389 | rs1464403 | 134259591 | rs2049149 | 0.627 |
| 3 | 134234389 | rs1464403 | 134273376 | rs4496483 | 0.643 |
| 3 | 134234389 | rs1464403 | 134280489 | rs2369970 | 0.219 |
| 3 | 134238872 | rs7633217 | 134243117 | rs1568478 | 0.596 |
| 3 | 134238872 | rs7633217 | 134245860 | rs4854680 | 0.605 |
| 3 | 134238872 | rs7633217 | 134250282 | rs7631593 | 0.870 |
| 3 | 134238872 | rs7633217 | 134259591 | rs2049149 | 0.372 |
| 3 | 134238872 | rs7633217 | 134273376 | rs4496483 | 0.285 |
| 3 | 134238872 | rs7633217 | 134280489 | rs2369970 | 0.555 |
| 3 | 134243117 | rs1568478 | 134245860 | rs4854680 | 0.968 |
| 3 | 134243117 | rs1568478 | 134250282 | rs7631593 | 0.553 |
| 3 | 134243117 | rs1568478 | 134259591 | rs2049149 | 0.688 |

|   |           |            |           |           |       |
|---|-----------|------------|-----------|-----------|-------|
| 3 | 134243117 | rs1568478  | 134273376 | rs4496483 | 0.582 |
| 3 | 134243117 | rs1568478  | 134280489 | rs2369970 | 0.245 |
| 3 | 134245860 | rs4854680  | 134250282 | rs7631593 | 0.574 |
| 3 | 134245860 | rs4854680  | 134259591 | rs2049149 | 0.656 |
| 3 | 134245860 | rs4854680  | 134273376 | rs4496483 | 0.552 |
| 3 | 134245860 | rs4854680  | 134280489 | rs2369970 | 0.266 |
| 3 | 134250282 | rs7631593  | 134259591 | rs2049149 | 0.343 |
| 3 | 134250282 | rs7631593  | 134273376 | rs4496483 | 0.257 |
| 3 | 134250282 | rs7631593  | 134280489 | rs2369970 | 0.482 |
| 3 | 134259591 | rs2049149  | 134273376 | rs4496483 | 0.806 |
| 3 | 135555339 | rs2400279  | 135589184 | rs2400273 | 0.417 |
| 3 | 136129859 | rs36178    | 136129897 | rs39704   | 1.000 |
| 3 | 136129859 | rs36178    | 136150839 | rs4955459 | 0.688 |
| 3 | 136129859 | rs36178    | 136153214 | rs7644369 | 0.664 |
| 3 | 136129897 | rs39704    | 136150839 | rs4955459 | 0.688 |
| 3 | 136129897 | rs39704    | 136153214 | rs7644369 | 0.664 |
| 3 | 136150839 | rs4955459  | 136153214 | rs7644369 | 0.982 |
| 3 | 136763460 | rs6439578  | 136763883 | rs7621220 | 0.881 |
| 3 | 138570477 | rs10222397 | 138638963 | rs4678337 | 0.400 |
| 3 | 141775226 | rs347973   | 141863447 | rs9881950 | 0.379 |
| 3 | 141775226 | rs347973   | 141886682 | rs3913019 | 0.495 |
| 3 | 141775226 | rs347973   | 141890495 | rs4683516 | 0.375 |
| 3 | 141798405 | rs16850633 | 141813475 | rs1499876 | 0.987 |
| 3 | 141798405 | rs16850633 | 141835923 | rs1696201 | 0.557 |
| 3 | 141798405 | rs16850633 | 141863447 | rs9881950 | 0.206 |
| 3 | 141798405 | rs16850633 | 141881767 | rs698666  | 0.743 |
| 3 | 141798405 | rs16850633 | 141890495 | rs4683516 | 0.230 |
| 3 | 141813475 | rs1499876  | 141835923 | rs1696201 | 0.569 |
| 3 | 141813475 | rs1499876  | 141863447 | rs9881950 | 0.215 |
| 3 | 141813475 | rs1499876  | 141881767 | rs698666  | 0.755 |
| 3 | 141813475 | rs1499876  | 141890495 | rs4683516 | 0.237 |
| 3 | 141835923 | rs1696201  | 141881767 | rs698666  | 0.746 |
| 3 | 141835923 | rs1696201  | 141886682 | rs3913019 | 0.311 |
| 3 | 141835923 | rs1696201  | 141890495 | rs4683516 | 0.343 |
| 3 | 141863447 | rs9881950  | 141881767 | rs698666  | 0.353 |
| 3 | 141863447 | rs9881950  | 141886682 | rs3913019 | 0.800 |
| 3 | 141863447 | rs9881950  | 141890495 | rs4683516 | 0.777 |
| 3 | 141881767 | rs698666   | 141886682 | rs3913019 | 0.256 |
| 3 | 141881767 | rs698666   | 141890495 | rs4683516 | 0.384 |
| 3 | 141886682 | rs3913019  | 141890495 | rs4683516 | 0.795 |
| 3 | 142268524 | rs10935417 | 142273269 | rs9823690 | 0.496 |
| 3 | 142428375 | rs967526   | 142480315 | rs1877223 | 0.260 |
| 3 | 145148707 | rs17602500 | 145203559 | rs6778627 | 0.595 |
| 3 | 145148707 | rs17602500 | 145218205 | rs4527375 | 0.823 |

|   |           |            |           |            |       |
|---|-----------|------------|-----------|------------|-------|
| 3 | 145148707 | rs17602500 | 145218290 | rs4613453  | 0.823 |
| 3 | 145148707 | rs17602500 | 145219064 | rs7611326  | 0.821 |
| 3 | 145148707 | rs17602500 | 145238877 | rs1025984  | 0.593 |
| 3 | 145148707 | rs17602500 | 145302196 | rs1530477  | 0.590 |
| 3 | 145203559 | rs6778627  | 145218205 | rs4527375  | 0.707 |
| 3 | 145203559 | rs6778627  | 145218290 | rs4613453  | 0.707 |
| 3 | 145203559 | rs6778627  | 145219064 | rs7611326  | 0.711 |
| 3 | 145203559 | rs6778627  | 145238877 | rs1025984  | 0.970 |
| 3 | 145203559 | rs6778627  | 145302196 | rs1530477  | 0.508 |
| 3 | 145218205 | rs4527375  | 145218290 | rs4613453  | 1.000 |
| 3 | 145218205 | rs4527375  | 145219064 | rs7611326  | 1.000 |
| 3 | 145218205 | rs4527375  | 145238877 | rs1025984  | 0.690 |
| 3 | 145218205 | rs4527375  | 145302196 | rs1530477  | 0.700 |
| 3 | 145218290 | rs4613453  | 145219064 | rs7611326  | 1.000 |
| 3 | 145218290 | rs4613453  | 145238877 | rs1025984  | 0.690 |
| 3 | 145218290 | rs4613453  | 145302196 | rs1530477  | 0.700 |
| 3 | 145219064 | rs7611326  | 145238877 | rs1025984  | 0.694 |
| 3 | 145219064 | rs7611326  | 145302196 | rs1530477  | 0.697 |
| 3 | 145238877 | rs1025984  | 145302196 | rs1530477  | 0.502 |
| 3 | 146711304 | rs13091557 | 146721568 | rs4470459  | 0.991 |
| 3 | 146711304 | rs13091557 | 146736032 | rs6792834  | 0.963 |
| 3 | 146721568 | rs4470459  | 146736032 | rs6792834  | 0.954 |
| 3 | 151992294 | rs6769917  | 151998413 | rs41454348 | 0.347 |
| 3 | 154798092 | rs3846073  | 154803470 | rs16822807 | 0.314 |
| 3 | 156556033 | rs4561871  | 156561704 | rs3924188  | 0.988 |
| 3 | 160526956 | rs1349165  | 160526972 | rs1349166  | 0.986 |
| 3 | 160968833 | rs13075534 | 161011416 | rs7631400  | 0.698 |
| 3 | 165313941 | rs1375846  | 165319181 | rs1375832  | 1.000 |
| 3 | 165313941 | rs1375846  | 165341254 | rs1349285  | 1.000 |
| 3 | 165313941 | rs1375846  | 165353361 | rs10936408 | 1.000 |
| 3 | 165313941 | rs1375846  | 165377741 | rs12495540 | 0.601 |
| 3 | 165319181 | rs1375832  | 165341254 | rs1349285  | 1.000 |
| 3 | 165319181 | rs1375832  | 165353361 | rs10936408 | 1.000 |
| 3 | 165319181 | rs1375832  | 165377741 | rs12495540 | 0.601 |
| 3 | 165341254 | rs1349285  | 165353361 | rs10936408 | 1.000 |
| 3 | 165341254 | rs1349285  | 165377741 | rs12495540 | 0.601 |
| 3 | 165353361 | rs10936408 | 165377741 | rs12495540 | 0.601 |
| 3 | 166990796 | rs9873779  | 166991935 | rs2089885  | 1.000 |
| 3 | 168786179 | rs4274741  | 168847165 | rs9829009  | 0.578 |
| 3 | 170169342 | rs17462877 | 170273620 | rs9823691  | 0.201 |
| 3 | 171011143 | rs10936601 | 171017960 | rs6793160  | 0.419 |
| 3 | 171672199 | rs1990805  | 171793139 | rs12496334 | 0.336 |
| 3 | 171672199 | rs1990805  | 171815244 | rs17289591 | 0.347 |
| 3 | 171793139 | rs12496334 | 171815244 | rs17289591 | 0.691 |



|   |           |            |           |            |       |
|---|-----------|------------|-----------|------------|-------|
| 3 | 172294361 | rs16855789 | 172294982 | rs12486611 | 0.978 |
| 3 | 174832272 | rs11916259 | 174845059 | rs16828950 | 0.758 |
| 3 | 174963401 | rs1352416  | 175046630 | rs6779415  | 0.409 |
| 3 | 175036477 | rs9829309  | 175046630 | rs6779415  | 0.324 |
| 3 | 175619121 | rs12632079 | 175619311 | rs12637543 | 0.951 |
| 3 | 175968504 | rs507227   | 175978617 | rs500999   | 0.345 |
| 3 | 176214706 | rs9863905  | 176220123 | rs9863038  | 0.202 |
| 3 | 176220123 | rs9863038  | 176238845 | rs9831769  | 0.268 |
| 3 | 178904969 | rs6798789  | 178908229 | rs1499810  | 0.222 |
| 3 | 178904969 | rs6798789  | 178914424 | rs4857726  | 0.222 |
| 3 | 178908229 | rs1499810  | 178914424 | rs4857726  | 0.979 |
| 3 | 181445006 | rs1608796  | 181464665 | rs3906013  | 0.455 |
| 3 | 181445006 | rs1608796  | 181802675 | rs1532485  | 0.264 |
| 3 | 181464665 | rs3906013  | 181664718 | rs1497891  | 0.288 |
| 3 | 181464665 | rs3906013  | 181747437 | rs904241   | 0.310 |
| 3 | 181464665 | rs3906013  | 181781172 | rs6791597  | 0.285 |
| 3 | 181464665 | rs3906013  | 181802675 | rs1532485  | 0.222 |
| 3 | 181588372 | rs7629793  | 181747437 | rs904241   | 0.363 |
| 3 | 181588372 | rs7629793  | 181781172 | rs6791597  | 0.388 |
| 3 | 181664718 | rs1497891  | 181747437 | rs904241   | 0.576 |
| 3 | 181664718 | rs1497891  | 181781172 | rs6791597  | 0.526 |
| 3 | 181664718 | rs1497891  | 181802675 | rs1532485  | 0.558 |
| 3 | 181747437 | rs904241   | 181781172 | rs6791597  | 0.954 |
| 3 | 181747437 | rs904241   | 181802675 | rs1532485  | 0.283 |
| 3 | 181781172 | rs6791597  | 181802675 | rs1532485  | 0.278 |
| 3 | 183980377 | rs6788905  | 183981452 | rs9878953  | 0.986 |
| 3 | 184611932 | rs4859184  | 184677420 | rs2971460  | 0.226 |
| 3 | 186117711 | rs6788431  | 186201847 | rs4686948  | 0.406 |
| 3 | 188201439 | rs13322676 | 188223915 | rs3872724  | 0.309 |
| 3 | 188593677 | rs2102860  | 188636560 | rs2687926  | 0.672 |
| 3 | 188705061 | rs9830704  | 188716825 | rs6774087  | 0.250 |
| 3 | 188873838 | rs17728902 | 188931691 | rs6762932  | 0.236 |
| 3 | 190732822 | rs17429491 | 190743319 | rs1364596  | 0.547 |
| 3 | 190732822 | rs17429491 | 190764506 | rs3846096  | 0.407 |
| 3 | 190743319 | rs1364596  | 190764506 | rs3846096  | 0.818 |
| 3 | 190743319 | rs1364596  | 190823284 | rs1881990  | 0.382 |
| 3 | 190764506 | rs3846096  | 190823284 | rs1881990  | 0.360 |
| 3 | 191253292 | rs7632740  | 191273841 | rs1403414  | 0.600 |
| 3 | 191253292 | rs7632740  | 191280803 | rs1522930  | 0.335 |
| 3 | 191273841 | rs1403414  | 191280803 | rs1522930  | 0.509 |
| 3 | 191462419 | rs2378568  | 191467837 | rs17427594 | 0.329 |
| 3 | 191462419 | rs2378568  | 191473777 | rs9837705  | 0.351 |
| 3 | 191473777 | rs9837705  | 191510966 | rs3774028  | 0.400 |
| 3 | 193459773 | rs6793796  | 193461726 | rs4687304  | 0.693 |

|   |           |            |           |            |       |
|---|-----------|------------|-----------|------------|-------|
| 3 | 198797165 | rs9859281  | 198797230 | rs9842166  | 0.573 |
| 3 | 198797165 | rs9859281  | 198799512 | rs2082270  | 0.268 |
| 3 | 198797165 | rs9859281  | 198812273 | rs7613131  | 0.299 |
| 3 | 198797230 | rs9842166  | 198799512 | rs2082270  | 0.369 |
| 3 | 198799512 | rs2082270  | 198812273 | rs7613131  | 0.629 |
| 4 | 2124815   | rs554222   | 2130692   | rs10488836 | 0.777 |
| 4 | 3131244   | rs3025838  | 3279182   | rs41347150 | 0.282 |
| 4 | 5292472   | rs6817353  | 5880158   | rs3821936  | 0.392 |
| 4 | 5434203   | rs16837064 | 5435157   | rs10937641 | 0.779 |
| 4 | 7058979   | rs10013211 | 7098003   | rs11931598 | 0.263 |
| 4 | 7511247   | rs731634   | 7514665   | rs7675528  | 0.439 |
| 4 | 9733039   | rs10516201 | 9783237   | rs4697718  | 0.448 |
| 4 | 9733039   | rs10516201 | 9797020   | rs4697727  | 0.351 |
| 4 | 9733039   | rs10516201 | 9817876   | rs6826450  | 0.379 |
| 4 | 9733039   | rs10516201 | 9817986   | rs6855489  | 0.379 |
| 4 | 9733039   | rs10516201 | 9924194   | rs17477561 | 0.654 |
| 4 | 9733917   | rs4444830  | 9797020   | rs4697727  | 0.221 |
| 4 | 9783237   | rs4697718  | 9797020   | rs4697727  | 0.760 |
| 4 | 9783237   | rs4697718  | 9817876   | rs6826450  | 0.832 |
| 4 | 9783237   | rs4697718  | 9817986   | rs6855489  | 0.832 |
| 4 | 9783237   | rs4697718  | 9899824   | rs7692559  | 0.327 |
| 4 | 9783237   | rs4697718  | 9924194   | rs17477561 | 0.592 |
| 4 | 9797020   | rs4697727  | 9817876   | rs6826450  | 0.912 |
| 4 | 9797020   | rs4697727  | 9817986   | rs6855489  | 0.912 |
| 4 | 9797020   | rs4697727  | 9899824   | rs7692559  | 0.417 |
| 4 | 9797020   | rs4697727  | 9924194   | rs17477561 | 0.524 |
| 4 | 9817876   | rs6826450  | 9817986   | rs6855489  | 1.000 |
| 4 | 9817876   | rs6826450  | 9899824   | rs7692559  | 0.398 |
| 4 | 9817876   | rs6826450  | 9924194   | rs17477561 | 0.565 |
| 4 | 9817986   | rs6855489  | 9899824   | rs7692559  | 0.398 |
| 4 | 9817986   | rs6855489  | 9924194   | rs17477561 | 0.565 |
| 4 | 9899824   | rs7692559  | 9924194   | rs17477561 | 0.244 |
| 4 | 10571494  | rs11736131 | 10582659  | rs10025796 | 0.939 |
| 4 | 10571494  | rs11736131 | 10611626  | rs2128863  | 0.249 |
| 4 | 10571494  | rs11736131 | 10617880  | rs2869765  | 0.256 |
| 4 | 10582659  | rs10025796 | 10611626  | rs2128863  | 0.272 |
| 4 | 10582659  | rs10025796 | 10617880  | rs2869765  | 0.265 |
| 4 | 10611626  | rs2128863  | 10617880  | rs2869765  | 0.952 |
| 4 | 10687755  | rs7681347  | 10691247  | rs7685923  | 1.000 |
| 4 | 10687755  | rs7681347  | 10701650  | rs4697838  | 1.000 |
| 4 | 10687755  | rs7681347  | 10701939  | rs4697839  | 1.000 |
| 4 | 10687755  | rs7681347  | 10784850  | rs7659670  | 0.220 |
| 4 | 10691247  | rs7685923  | 10701650  | rs4697838  | 1.000 |
| 4 | 10691247  | rs7685923  | 10701939  | rs4697839  | 1.000 |

|   |          |            |          |            |       |
|---|----------|------------|----------|------------|-------|
| 4 | 10691247 | rs7685923  | 10784850 | rs7659670  | 0.220 |
| 4 | 10701650 | rs4697838  | 10701939 | rs4697839  | 1.000 |
| 4 | 10701650 | rs4697838  | 10784850 | rs7659670  | 0.220 |
| 4 | 10701939 | rs4697839  | 10784850 | rs7659670  | 0.220 |
| 4 | 10728210 | rs16878217 | 10730190 | rs16878245 | 0.977 |
| 4 | 11216599 | rs10488990 | 11219566 | rs2108955  | 0.205 |
| 4 | 12666968 | rs481266   | 12691442 | rs497117   | 0.222 |
| 4 | 14360658 | rs4577573  | 14391557 | rs4502675  | 0.360 |
| 4 | 14391557 | rs4502675  | 14399576 | rs12502866 | 0.626 |
| 4 | 17176453 | rs13103430 | 17217982 | rs4698629  | 0.427 |
| 4 | 17176453 | rs13103430 | 17239290 | rs4698634  | 0.401 |
| 4 | 17217982 | rs4698629  | 17239290 | rs4698634  | 0.635 |
| 4 | 18871602 | rs312352   | 19164533 | rs4642242  | 0.208 |
| 4 | 19054034 | rs9995581  | 19118623 | rs4577579  | 0.279 |
| 4 | 19054034 | rs9995581  | 19203653 | rs16868634 | 0.785 |
| 4 | 19054034 | rs9995581  | 19216491 | rs1032258  | 0.785 |
| 4 | 19115959 | rs4440215  | 19118623 | rs4577579  | 0.214 |
| 4 | 19118623 | rs4577579  | 19164533 | rs4642242  | 0.230 |
| 4 | 19164533 | rs4642242  | 19190933 | rs11734810 | 0.288 |
| 4 | 19203653 | rs16868634 | 19216491 | rs1032258  | 1.000 |
| 4 | 20694428 | rs6817687  | 20697443 | rs4599408  | 0.894 |
| 4 | 20781183 | rs1836087  | 20781282 | rs6821250  | 1.000 |
| 4 | 20781183 | rs1836087  | 20790093 | rs1319225  | 0.909 |
| 4 | 20781282 | rs6821250  | 20790093 | rs1319225  | 0.909 |
| 4 | 24427607 | rs800453   | 24482702 | rs13131918 | 0.484 |
| 4 | 24427607 | rs800453   | 24495197 | rs4697489  | 0.513 |
| 4 | 24482702 | rs13131918 | 24495197 | rs4697489  | 0.883 |
| 4 | 25654795 | rs6841440  | 25655054 | rs7684555  | 0.918 |
| 4 | 25654795 | rs6841440  | 25657239 | rs2137231  | 0.592 |
| 4 | 25655054 | rs7684555  | 25657239 | rs2137231  | 0.591 |
| 4 | 25951636 | rs6821126  | 25966991 | rs2153155  | 0.306 |
| 4 | 25966991 | rs2153155  | 26051306 | rs13134710 | 0.433 |
| 4 | 26458873 | rs10939139 | 26461536 | rs7660174  | 0.481 |
| 4 | 26458873 | rs10939139 | 26462750 | rs7671671  | 0.736 |
| 4 | 26458873 | rs10939139 | 26571971 | rs10032186 | 0.553 |
| 4 | 26461536 | rs7660174  | 26462750 | rs7671671  | 0.632 |
| 4 | 26461536 | rs7660174  | 26571971 | rs10032186 | 0.231 |
| 4 | 26462750 | rs7671671  | 26571971 | rs10032186 | 0.462 |
| 4 | 28188118 | rs2458628  | 28261899 | rs2101697  | 0.638 |
| 4 | 30118029 | rs1588610  | 30131509 | rs10031821 | 0.969 |
| 4 | 30118029 | rs1588610  | 30142909 | rs1818442  | 0.692 |
| 4 | 30118029 | rs1588610  | 30239480 | rs767478   | 0.343 |
| 4 | 30131509 | rs10031821 | 30142909 | rs1818442  | 0.671 |
| 4 | 30131509 | rs10031821 | 30239480 | rs767478   | 0.326 |

|   |          |            |          |            |       |
|---|----------|------------|----------|------------|-------|
| 4 | 30142909 | rs1818442  | 30239480 | rs767478   | 0.517 |
| 4 | 31757023 | rs10014802 | 31773932 | rs11133180 | 0.326 |
| 4 | 31773932 | rs11133180 | 31825250 | rs1118106  | 0.316 |
| 4 | 31845118 | rs17080915 | 31845304 | rs17299248 | 0.497 |
| 4 | 31845118 | rs17080915 | 31864983 | rs902658   | 0.501 |
| 4 | 31845118 | rs17080915 | 31865170 | rs2404759  | 0.501 |
| 4 | 31845304 | rs17299248 | 31864983 | rs902658   | 0.848 |
| 4 | 31845304 | rs17299248 | 31865170 | rs2404759  | 0.848 |
| 4 | 31864983 | rs902658   | 31865170 | rs2404759  | 1.000 |
| 4 | 32706365 | rs9306915  | 32739241 | rs9990848  | 0.540 |
| 4 | 32706365 | rs9306915  | 32742832 | rs28577134 | 0.457 |
| 4 | 32739241 | rs9990848  | 32742832 | rs28577134 | 0.809 |
| 4 | 36786141 | rs13144081 | 36864308 | rs1342993  | 0.246 |
| 4 | 37702617 | rs933820   | 37708185 | rs6820715  | 0.691 |
| 4 | 37702617 | rs933820   | 37708322 | rs10018836 | 0.675 |
| 4 | 37708185 | rs6820715  | 37708322 | rs10018836 | 0.966 |
| 4 | 42020972 | rs2632689  | 42038947 | rs1565113  | 0.604 |
| 4 | 42052652 | rs2632698  | 42052845 | rs2719949  | 0.569 |
| 4 | 42052652 | rs2632698  | 42077641 | rs1386617  | 0.458 |
| 4 | 42052652 | rs2632698  | 42081595 | rs2719950  | 0.523 |
| 4 | 42052652 | rs2632698  | 42086461 | rs2719959  | 0.415 |
| 4 | 42052845 | rs2719949  | 42077641 | rs1386617  | 0.235 |
| 4 | 42052845 | rs2719949  | 42081595 | rs2719950  | 0.783 |
| 4 | 42052845 | rs2719949  | 42086461 | rs2719959  | 0.591 |
| 4 | 42077641 | rs1386617  | 42081595 | rs2719950  | 0.353 |
| 4 | 42077641 | rs1386617  | 42086461 | rs2719959  | 0.294 |
| 4 | 42081595 | rs2719950  | 42086461 | rs2719959  | 0.734 |
| 4 | 42086461 | rs2719959  | 42304596 | rs35487523 | 0.226 |
| 4 | 44781944 | rs2048545  | 44792234 | rs7663667  | 0.984 |
| 4 | 47773350 | rs6850108  | 47784892 | rs10007288 | 0.935 |
| 4 | 58651643 | rs2660950  | 58669544 | rs17827094 | 0.942 |
| 4 | 58651643 | rs2660950  | 58669628 | rs17827100 | 0.933 |
| 4 | 58669544 | rs17827094 | 58669628 | rs17827100 | 0.990 |
| 4 | 60724394 | rs6551526  | 60920756 | rs11946495 | 0.260 |
| 4 | 60920756 | rs11946495 | 61100834 | rs11724820 | 0.253 |
| 4 | 62679165 | rs2193121  | 62765958 | rs2015977  | 0.288 |
| 4 | 62941177 | rs778933   | 62942012 | rs778934   | 0.979 |
| 4 | 64767521 | rs12651540 | 64952717 | rs10517893 | 0.297 |
| 4 | 64935458 | rs1601076  | 64952717 | rs10517893 | 0.442 |
| 4 | 64935458 | rs1601076  | 64955197 | rs9998808  | 0.752 |
| 4 | 64952717 | rs10517893 | 64955197 | rs9998808  | 0.555 |
| 4 | 66401913 | rs4434311  | 66490958 | rs4860723  | 0.280 |
| 4 | 66401913 | rs4434311  | 66500848 | rs1433622  | 0.320 |
| 4 | 66401913 | rs4434311  | 66687591 | rs980448   | 0.337 |

|   |          |            |          |            |       |
|---|----------|------------|----------|------------|-------|
| 4 | 66490958 | rs4860723  | 66687591 | rs980448   | 0.287 |
| 4 | 66500848 | rs1433622  | 66687591 | rs980448   | 0.284 |
| 4 | 67865677 | rs12504640 | 68135468 | rs931360   | 0.234 |
| 4 | 67916100 | rs17820729 | 67923741 | rs930438   | 0.608 |
| 4 | 69817484 | rs1458236  | 69848375 | rs1598904  | 1.000 |
| 4 | 69817484 | rs1458236  | 69848638 | rs1458243  | 0.943 |
| 4 | 69817484 | rs1458236  | 69852671 | rs1458246  | 0.988 |
| 4 | 69817484 | rs1458236  | 69871762 | rs10000481 | 0.314 |
| 4 | 69817484 | rs1458236  | 69897763 | rs2017990  | 0.293 |
| 4 | 69817484 | rs1458236  | 69912185 | rs6811878  | 0.383 |
| 4 | 69817484 | rs1458236  | 70004132 | rs6858558  | 0.222 |
| 4 | 69848375 | rs1598904  | 69848638 | rs1458243  | 0.943 |
| 4 | 69848375 | rs1598904  | 69852671 | rs1458246  | 0.988 |
| 4 | 69848375 | rs1598904  | 69871762 | rs10000481 | 0.314 |
| 4 | 69848375 | rs1598904  | 69897763 | rs2017990  | 0.293 |
| 4 | 69848375 | rs1598904  | 69912185 | rs6811878  | 0.383 |
| 4 | 69848375 | rs1598904  | 70004132 | rs6858558  | 0.222 |
| 4 | 69848638 | rs1458243  | 69852671 | rs1458246  | 0.955 |
| 4 | 69848638 | rs1458243  | 69871762 | rs10000481 | 0.298 |
| 4 | 69848638 | rs1458243  | 69897763 | rs2017990  | 0.361 |
| 4 | 69848638 | rs1458243  | 69912185 | rs6811878  | 0.415 |
| 4 | 69848638 | rs1458243  | 70004132 | rs6858558  | 0.234 |
| 4 | 69852671 | rs1458246  | 69871762 | rs10000481 | 0.310 |
| 4 | 69852671 | rs1458246  | 69897763 | rs2017990  | 0.303 |
| 4 | 69852671 | rs1458246  | 69912185 | rs6811878  | 0.398 |
| 4 | 69852671 | rs1458246  | 70004132 | rs6858558  | 0.221 |
| 4 | 69871762 | rs10000481 | 69897763 | rs2017990  | 0.360 |
| 4 | 69897763 | rs2017990  | 69912185 | rs6811878  | 0.311 |
| 4 | 69912185 | rs6811878  | 70004132 | rs6858558  | 0.380 |
| 4 | 70004132 | rs6858558  | 70052120 | rs4348160  | 0.289 |
| 4 | 71189199 | rs17713792 | 71224700 | rs2013685  | 0.373 |
| 4 | 72138031 | rs4694087  | 72209645 | rs4694380  | 0.280 |
| 4 | 73714898 | rs16848366 | 73794412 | rs10518108 | 0.349 |
| 4 | 73714898 | rs16848366 | 73827020 | rs11935685 | 0.726 |
| 4 | 73794412 | rs10518108 | 73827020 | rs11935685 | 0.489 |
| 4 | 74150390 | rs4694155  | 74313364 | rs9291182  | 0.433 |
| 4 | 74836146 | rs1951242  | 74845025 | rs10938095 | 0.323 |
| 4 | 76204933 | rs6827697  | 76215877 | rs17000197 | 0.686 |
| 4 | 76204933 | rs6827697  | 76216335 | rs17000199 | 0.369 |
| 4 | 76215877 | rs17000197 | 76216335 | rs17000199 | 0.619 |
| 4 | 77125998 | rs4859581  | 77196808 | rs4422436  | 0.669 |
| 4 | 77363283 | rs1114091  | 77396841 | rs2289514  | 0.267 |
| 4 | 77363283 | rs1114091  | 77397403 | rs6819794  | 0.380 |
| 4 | 77396841 | rs2289514  | 77397403 | rs6819794  | 0.421 |

|   |           |            |           |            |       |
|---|-----------|------------|-----------|------------|-------|
| 4 | 78095863  | rs9307224  | 78132337  | rs904032   | 0.920 |
| 4 | 78095863  | rs9307224  | 78132395  | rs904033   | 0.919 |
| 4 | 78132337  | rs904032   | 78132395  | rs904033   | 0.982 |
| 4 | 78563409  | rs41476645 | 78564144  | rs12644936 | 1.000 |
| 4 | 78941339  | rs4859879  | 78954919  | rs11097938 | 1.000 |
| 4 | 78941339  | rs4859879  | 79077539  | rs4577601  | 0.560 |
| 4 | 78941339  | rs4859879  | 79143992  | rs12641050 | 0.245 |
| 4 | 78954919  | rs11097938 | 79077539  | rs4577601  | 0.560 |
| 4 | 78954919  | rs11097938 | 79143992  | rs12641050 | 0.245 |
| 4 | 79077539  | rs4577601  | 79143992  | rs12641050 | 0.562 |
| 4 | 80133431  | rs1545805  | 80154502  | rs1383421  | 0.358 |
| 4 | 80133431  | rs1545805  | 80158557  | rs899900   | 0.873 |
| 4 | 80133431  | rs1545805  | 80202969  | rs2604828  | 0.560 |
| 4 | 80154502  | rs1383421  | 80158557  | rs899900   | 0.338 |
| 4 | 80158557  | rs899900   | 80202969  | rs2604828  | 0.680 |
| 4 | 80168623  | rs17003582 | 80202969  | rs2604828  | 0.220 |
| 4 | 81217787  | rs6817424  | 81705296  | rs4346635  | 0.259 |
| 4 | 81217787  | rs6817424  | 82053941  | rs10213174 | 0.359 |
| 4 | 81442178  | rs12650677 | 81471743  | rs6822305  | 0.456 |
| 4 | 81442178  | rs12650677 | 81597990  | rs7683819  | 0.347 |
| 4 | 81597990  | rs7683819  | 81705296  | rs4346635  | 0.404 |
| 4 | 81705296  | rs4346635  | 82053941  | rs10213174 | 0.590 |
| 4 | 82053941  | rs10213174 | 82208527  | rs2685468  | 0.205 |
| 4 | 82208527  | rs2685468  | 82254091  | rs7675843  | 0.236 |
| 4 | 82827868  | rs4574400  | 82829803  | rs6839535  | 0.979 |
| 4 | 82827868  | rs4574400  | 82833681  | rs9996469  | 0.524 |
| 4 | 82829803  | rs6839535  | 82833681  | rs9996469  | 0.504 |
| 4 | 85903170  | rs11728145 | 86686809  | rs1994069  | 0.244 |
| 4 | 88013326  | rs10015508 | 88018240  | rs6811350  | 0.907 |
| 4 | 88013326  | rs10015508 | 88192729  | rs431836   | 0.651 |
| 4 | 88018240  | rs6811350  | 88192729  | rs431836   | 0.722 |
| 4 | 90955029  | rs1837890  | 90955047  | rs1442143  | 1.000 |
| 4 | 92739442  | rs9991015  | 92740065  | rs10014070 | 1.000 |
| 4 | 96474594  | rs4699421  | 96515157  | rs2621455  | 0.398 |
| 4 | 96474594  | rs4699421  | 96522013  | rs6824501  | 0.337 |
| 4 | 96515157  | rs2621455  | 96522013  | rs6824501  | 0.256 |
| 4 | 100932644 | rs13134954 | 100932788 | rs11735070 | 0.991 |
| 4 | 103676448 | rs230529   | 103725482 | rs1598859  | 0.619 |
| 4 | 103676448 | rs230529   | 103737343 | rs4648068  | 0.532 |
| 4 | 103725482 | rs1598859  | 103737343 | rs4648068  | 0.877 |
| 4 | 105978188 | rs2725771  | 105991543 | rs3886330  | 0.220 |
| 4 | 106633149 | rs4699182  | 106698459 | rs7672413  | 0.455 |
| 4 | 110227110 | rs3108958  | 110227270 | rs12646527 | 0.519 |
| 4 | 112168892 | rs9307361  | 112171839 | rs159476   | 0.206 |

|   |           |            |           |            |       |
|---|-----------|------------|-----------|------------|-------|
| 4 | 112168892 | rs9307361  | 112180135 | rs159471   | 0.414 |
| 4 | 112171839 | rs159476   | 112180135 | rs159471   | 0.418 |
| 4 | 114641161 | rs17446453 | 114645383 | rs4834347  | 0.965 |
| 4 | 114641161 | rs17446453 | 114648856 | rs11098193 | 0.913 |
| 4 | 114645383 | rs4834347  | 114648856 | rs11098193 | 0.947 |
| 4 | 115660061 | rs4385142  | 115668021 | rs41352946 | 0.870 |
| 4 | 116949884 | rs7680117  | 117024524 | rs7697741  | 0.954 |
| 4 | 117400685 | rs1906694  | 117428886 | rs7669497  | 0.726 |
| 4 | 117400685 | rs1906694  | 117435227 | rs6832218  | 0.751 |
| 4 | 117400685 | rs1906694  | 117488271 | rs11935514 | 0.359 |
| 4 | 117400685 | rs1906694  | 117488695 | rs41518644 | 0.359 |
| 4 | 117428886 | rs7669497  | 117435227 | rs6832218  | 0.990 |
| 4 | 117428886 | rs7669497  | 117488271 | rs11935514 | 0.264 |
| 4 | 117428886 | rs7669497  | 117488695 | rs41518644 | 0.264 |
| 4 | 117435227 | rs6832218  | 117488271 | rs11935514 | 0.261 |
| 4 | 117435227 | rs6832218  | 117488695 | rs41518644 | 0.261 |
| 4 | 117488271 | rs11935514 | 117488695 | rs41518644 | 1.000 |
| 4 | 120628600 | rs10006706 | 120643383 | rs12510138 | 0.988 |
| 4 | 121913509 | rs10026533 | 121986119 | rs1588524  | 0.951 |
| 4 | 122156529 | rs4532258  | 122177009 | rs34766411 | 0.938 |
| 4 | 122203473 | rs6829190  | 122215148 | rs2136948  | 0.980 |
| 4 | 122203473 | rs6829190  | 122220644 | rs13138476 | 0.990 |
| 4 | 122203473 | rs6829190  | 122235041 | rs13128284 | 0.960 |
| 4 | 122215148 | rs2136948  | 122220644 | rs13138476 | 0.970 |
| 4 | 122215148 | rs2136948  | 122235041 | rs13128284 | 0.938 |
| 4 | 122220644 | rs13138476 | 122235041 | rs13128284 | 0.951 |
| 4 | 124899190 | rs17007339 | 124901195 | rs9992459  | 0.958 |
| 4 | 127017986 | rs2390896  | 127027641 | rs11932292 | 1.000 |
| 4 | 131253674 | rs958409   | 131281403 | rs2172478  | 0.292 |
| 4 | 131253674 | rs958409   | 131281674 | rs1552802  | 0.254 |
| 4 | 131281403 | rs2172478  | 131281674 | rs1552802  | 0.907 |
| 4 | 133143041 | rs6847963  | 133148446 | rs1511333  | 0.954 |
| 4 | 133143041 | rs6847963  | 133148931 | rs17468426 | 0.681 |
| 4 | 133148446 | rs1511333  | 133148931 | rs17468426 | 0.688 |
| 4 | 133572980 | rs1499348  | 133615345 | rs1875024  | 0.508 |
| 4 | 135291303 | rs7691662  | 135469395 | rs7663402  | 0.653 |
| 4 | 136731472 | rs7654065  | 136735906 | rs7692855  | 0.918 |
| 4 | 136731472 | rs7654065  | 136740519 | rs11737477 | 1.000 |
| 4 | 136731472 | rs7654065  | 136748977 | rs13119704 | 0.496 |
| 4 | 136735906 | rs7692855  | 136740519 | rs11737477 | 0.918 |
| 4 | 136735906 | rs7692855  | 136748977 | rs13119704 | 0.544 |
| 4 | 136740519 | rs11737477 | 136748977 | rs13119704 | 0.495 |
| 4 | 136918253 | rs17048200 | 136929875 | rs11730105 | 0.816 |
| 4 | 136918253 | rs17048200 | 136934225 | rs12510799 | 0.319 |

|   |           |            |           |            |       |
|---|-----------|------------|-----------|------------|-------|
| 4 | 136929875 | rs11730105 | 136934225 | rs12510799 | 0.281 |
| 4 | 141475312 | rs2036947  | 141484584 | rs996116   | 0.897 |
| 4 | 141475312 | rs2036947  | 141509306 | rs4956293  | 0.285 |
| 4 | 141484584 | rs996116   | 141509306 | rs4956293  | 0.281 |
| 4 | 141484584 | rs996116   | 141534172 | rs358332   | 0.207 |
| 4 | 141509306 | rs4956293  | 141524043 | rs358315   | 0.726 |
| 4 | 141509306 | rs4956293  | 141524729 | rs358317   | 0.726 |
| 4 | 141509306 | rs4956293  | 141534172 | rs358332   | 0.433 |
| 4 | 141524043 | rs358315   | 141524729 | rs358317   | 1.000 |
| 4 | 141524043 | rs358315   | 141534172 | rs358332   | 0.610 |
| 4 | 141524729 | rs358317   | 141534172 | rs358332   | 0.610 |
| 4 | 142897271 | rs970509   | 142898776 | rs10033884 | 0.530 |
| 4 | 142897271 | rs970509   | 142907840 | rs4254850  | 0.880 |
| 4 | 142898776 | rs10033884 | 142907840 | rs4254850  | 0.463 |
| 4 | 143067127 | rs10011008 | 143070590 | rs7663877  | 0.254 |
| 4 | 143193708 | rs2645799  | 143195291 | rs2667099  | 0.969 |
| 4 | 143193708 | rs2645799  | 143222465 | rs1353603  | 0.592 |
| 4 | 143195291 | rs2667099  | 143222465 | rs1353603  | 0.575 |
| 4 | 147752642 | rs17021632 | 147762864 | rs17021660 | 0.587 |
| 4 | 147959961 | rs17021984 | 148056414 | rs12503342 | 0.333 |
| 4 | 148056414 | rs12503342 | 148897061 | rs10519914 | 0.202 |
| 4 | 148560383 | rs1429117  | 148581870 | rs17023259 | 0.636 |
| 4 | 153248310 | rs17276464 | 153310773 | rs2897464  | 0.529 |
| 4 | 153248310 | rs17276464 | 153313090 | rs4586908  | 0.271 |
| 4 | 153310773 | rs2897464  | 153313090 | rs4586908  | 0.556 |
| 4 | 155987069 | rs1500394  | 155991081 | rs6832964  | 0.952 |
| 4 | 155987069 | rs1500394  | 155991353 | rs1500370  | 0.952 |
| 4 | 155991081 | rs6832964  | 155991353 | rs1500370  | 1.000 |
| 4 | 157754977 | rs6811244  | 157771848 | rs7672387  | 0.381 |
| 4 | 160047778 | rs2291007  | 160054590 | rs9998057  | 0.472 |
| 4 | 161529034 | rs34082346 | 161529827 | rs1898866  | 0.439 |
| 4 | 161529034 | rs34082346 | 161530598 | rs7677076  | 0.496 |
| 4 | 161529827 | rs1898866  | 161530598 | rs7677076  | 0.951 |
| 4 | 161935753 | rs8180366  | 161937609 | rs13128164 | 1.000 |
| 4 | 162151909 | rs2068177  | 162231847 | rs17375482 | 0.392 |
| 4 | 163445860 | rs6812566  | 163454734 | rs7675931  | 0.872 |
| 4 | 166504639 | rs1438111  | 166585980 | rs7663386  | 0.254 |
| 4 | 167318791 | rs6837937  | 167319366 | rs17047336 | 1.000 |
| 4 | 168181330 | rs7664643  | 168193181 | rs6818745  | 0.566 |
| 4 | 168722326 | rs992771   | 168761544 | rs10517948 | 0.234 |
| 4 | 171821698 | rs9994424  | 171823438 | rs5009480  | 0.720 |
| 4 | 171821698 | rs9994424  | 171871392 | rs10029768 | 0.281 |
| 4 | 171823438 | rs5009480  | 171871392 | rs10029768 | 0.393 |
| 4 | 173889675 | rs6841156  | 173922367 | rs13134194 | 0.625 |



|   |           |            |           |            |       |
|---|-----------|------------|-----------|------------|-------|
| 4 | 173889675 | rs6841156  | 173933544 | rs6819460  | 0.391 |
| 4 | 173922367 | rs13134194 | 173933544 | rs6819460  | 0.747 |
| 4 | 174559706 | rs17325472 | 174559803 | rs13148735 | 1.000 |
| 4 | 177402176 | rs4589981  | 177402550 | rs4690671  | 0.975 |
| 4 | 177461443 | rs13115859 | 177465508 | rs4077385  | 0.982 |
| 4 | 177461443 | rs13115859 | 177465879 | rs12331837 | 0.420 |
| 4 | 177461443 | rs13115859 | 177466713 | rs11133144 | 0.431 |
| 4 | 177465508 | rs4077385  | 177465879 | rs12331837 | 0.416 |
| 4 | 177465508 | rs4077385  | 177466713 | rs11133144 | 0.427 |
| 4 | 177465879 | rs12331837 | 177466713 | rs11133144 | 0.991 |
| 4 | 180407643 | rs1457394  | 180407774 | rs1457392  | 1.000 |
| 4 | 184613845 | rs6816216  | 184652332 | rs11723316 | 0.242 |
| 4 | 186046913 | rs7672399  | 186047130 | rs6552838  | 1.000 |
| 4 | 188113464 | rs6553029  | 188113823 | rs6821507  | 0.914 |
| 4 | 190362801 | rs7684484  | 190362818 | rs7684496  | 1.000 |
| 5 | 3102987   | rs13167386 | 3103455   | rs16870933 | 0.554 |
| 5 | 3102987   | rs13167386 | 3103780   | rs10041553 | 0.671 |
| 5 | 3103455   | rs16870933 | 3103780   | rs10041553 | 0.850 |
| 5 | 4360636   | rs1501737  | 4378585   | rs261189   | 0.902 |
| 5 | 4360636   | rs1501737  | 4378739   | rs261187   | 0.902 |
| 5 | 4360636   | rs1501737  | 4379793   | rs261182   | 0.902 |
| 5 | 4360636   | rs1501737  | 4380302   | rs261181   | 0.902 |
| 5 | 4360636   | rs1501737  | 4380853   | rs261179   | 0.734 |
| 5 | 4360636   | rs1501737  | 4394950   | rs261163   | 0.666 |
| 5 | 4360636   | rs1501737  | 4405277   | rs261150   | 0.739 |
| 5 | 4378585   | rs261189   | 4378739   | rs261187   | 1.000 |
| 5 | 4378585   | rs261189   | 4379793   | rs261182   | 1.000 |
| 5 | 4378585   | rs261189   | 4380302   | rs261181   | 1.000 |
| 5 | 4378585   | rs261189   | 4380853   | rs261179   | 0.791 |
| 5 | 4378585   | rs261189   | 4394950   | rs261163   | 0.718 |
| 5 | 4378585   | rs261189   | 4405277   | rs261150   | 0.799 |
| 5 | 4378739   | rs261187   | 4379793   | rs261182   | 1.000 |
| 5 | 4378739   | rs261187   | 4380302   | rs261181   | 1.000 |
| 5 | 4378739   | rs261187   | 4380853   | rs261179   | 0.791 |
| 5 | 4378739   | rs261187   | 4394950   | rs261163   | 0.718 |
| 5 | 4378739   | rs261187   | 4405277   | rs261150   | 0.799 |
| 5 | 4379793   | rs261182   | 4380302   | rs261181   | 1.000 |
| 5 | 4379793   | rs261182   | 4380853   | rs261179   | 0.791 |
| 5 | 4379793   | rs261182   | 4394950   | rs261163   | 0.718 |
| 5 | 4379793   | rs261182   | 4405277   | rs261150   | 0.799 |
| 5 | 4380302   | rs261181   | 4380853   | rs261179   | 0.791 |
| 5 | 4380302   | rs261181   | 4394950   | rs261163   | 0.718 |
| 5 | 4380302   | rs261181   | 4405277   | rs261150   | 0.799 |
| 5 | 4380853   | rs261179   | 4394950   | rs261163   | 0.936 |

|   |          |            |          |            |       |
|---|----------|------------|----------|------------|-------|
| 5 | 4380853  | rs261179   | 4405277  | rs261150   | 0.792 |
| 5 | 4394950  | rs261163   | 4405277  | rs261150   | 0.851 |
| 5 | 5145343  | rs2619802  | 5145444  | rs987587   | 1.000 |
| 5 | 5790796  | rs2399610  | 5790979  | rs7443606  | 0.955 |
| 5 | 5790796  | rs2399610  | 5803573  | rs441356   | 0.885 |
| 5 | 5790979  | rs7443606  | 5803573  | rs441356   | 0.928 |
| 5 | 5964381  | rs1150461  | 5964422  | rs1150462  | 0.893 |
| 5 | 7255635  | rs4298226  | 7269226  | rs13186772 | 0.253 |
| 5 | 7255635  | rs4298226  | 7272495  | rs4302553  | 0.259 |
| 5 | 7269226  | rs13186772 | 7272495  | rs4302553  | 0.960 |
| 5 | 7579847  | rs10068942 | 7585455  | rs4701786  | 0.755 |
| 5 | 9351117  | rs17196572 | 9363216  | rs1018956  | 0.378 |
| 5 | 9351117  | rs17196572 | 9372587  | rs3777324  | 0.364 |
| 5 | 9363216  | rs1018956  | 9372587  | rs3777324  | 0.970 |
| 5 | 9363216  | rs1018956  | 9406888  | rs2696372  | 0.371 |
| 5 | 9363216  | rs1018956  | 9409053  | rs1205719  | 0.359 |
| 5 | 9372587  | rs3777324  | 9406888  | rs2696372  | 0.364 |
| 5 | 9372587  | rs3777324  | 9409053  | rs1205719  | 0.352 |
| 5 | 9406888  | rs2696372  | 9409053  | rs1205719  | 0.989 |
| 5 | 9511879  | rs3822803  | 9518523  | rs12659136 | 0.914 |
| 5 | 9511879  | rs3822803  | 9570081  | rs7735345  | 0.658 |
| 5 | 9518523  | rs12659136 | 9570081  | rs7735345  | 0.706 |
| 5 | 12169668 | rs16902029 | 12423166 | rs2400152  | 0.619 |
| 5 | 14276271 | rs32394    | 14336073 | rs17302408 | 0.351 |
| 5 | 17190115 | rs297200   | 17206618 | rs2731796  | 0.522 |
| 5 | 17554965 | rs6894826  | 17713466 | rs6450583  | 0.707 |
| 5 | 19916375 | rs6869352  | 19938472 | rs4866161  | 0.413 |
| 5 | 19916375 | rs6869352  | 19947442 | rs11960225 | 0.417 |
| 5 | 19938472 | rs4866161  | 19947442 | rs11960225 | 0.991 |
| 5 | 22071307 | rs7445981  | 22072008 | rs4701563  | 0.885 |
| 5 | 25775740 | rs168843   | 25784003 | rs1585798  | 0.719 |
| 5 | 25775740 | rs168843   | 25786763 | rs1678935  | 0.761 |
| 5 | 25784003 | rs1585798  | 25786763 | rs1678935  | 0.849 |
| 5 | 25947094 | rs6862624  | 26011809 | rs11954820 | 0.307 |
| 5 | 28472749 | rs10072478 | 28500650 | rs13355546 | 0.841 |
| 5 | 29077660 | rs2618415  | 29082619 | rs1692334  | 1.000 |
| 5 | 29077660 | rs2618415  | 29088439 | rs602489   | 1.000 |
| 5 | 29082619 | rs1692334  | 29088439 | rs602489   | 1.000 |
| 5 | 40174561 | rs1159011  | 40174838 | rs1366020  | 1.000 |
| 5 | 40534334 | rs1505992  | 40545412 | rs1553576  | 0.860 |
| 5 | 40534334 | rs1505992  | 40545764 | rs1553577  | 0.834 |
| 5 | 40534334 | rs1505992  | 40551279 | rs4957313  | 0.844 |
| 5 | 40534334 | rs1505992  | 40551774 | rs6896604  | 0.826 |
| 5 | 40534334 | rs1505992  | 40553088 | rs6866402  | 0.825 |

|   |          |           |          |            |       |
|---|----------|-----------|----------|------------|-------|
| 5 | 40534334 | rs1505992 | 40553482 | rs4957317  | 0.882 |
| 5 | 40534334 | rs1505992 | 40557969 | rs10941516 | 0.351 |
| 5 | 40534334 | rs1505992 | 40564436 | rs7718129  | 0.352 |
| 5 | 40534334 | rs1505992 | 40597115 | rs11750156 | 0.804 |
| 5 | 40545412 | rs1553576 | 40545764 | rs1553577  | 0.972 |
| 5 | 40545412 | rs1553576 | 40551279 | rs4957313  | 0.982 |
| 5 | 40545412 | rs1553576 | 40551774 | rs6896604  | 0.963 |
| 5 | 40545412 | rs1553576 | 40553088 | rs6866402  | 0.963 |
| 5 | 40545412 | rs1553576 | 40553482 | rs4957317  | 0.946 |
| 5 | 40545412 | rs1553576 | 40557969 | rs10941516 | 0.386 |
| 5 | 40545412 | rs1553576 | 40564436 | rs7718129  | 0.424 |
| 5 | 40545412 | rs1553576 | 40597115 | rs11750156 | 0.890 |
| 5 | 40545412 | rs1553576 | 40605710 | rs10055860 | 0.897 |
| 5 | 40545764 | rs1553577 | 40551279 | rs4957313  | 0.972 |
| 5 | 40545764 | rs1553577 | 40551774 | rs6896604  | 0.991 |
| 5 | 40545764 | rs1553577 | 40553088 | rs6866402  | 0.991 |
| 5 | 40545764 | rs1553577 | 40553482 | rs4957317  | 0.920 |
| 5 | 40545764 | rs1553577 | 40557969 | rs10941516 | 0.372 |
| 5 | 40545764 | rs1553577 | 40564436 | rs7718129  | 0.429 |
| 5 | 40545764 | rs1553577 | 40597115 | rs11750156 | 0.879 |
| 5 | 40545764 | rs1553577 | 40605710 | rs10055860 | 0.895 |
| 5 | 40545764 | rs1553577 | 40605832 | rs10055946 | 0.415 |
| 5 | 40551279 | rs4957313 | 40551774 | rs6896604  | 0.982 |
| 5 | 40551279 | rs4957313 | 40553088 | rs6866402  | 0.981 |
| 5 | 40551279 | rs4957313 | 40553482 | rs4957317  | 0.947 |
| 5 | 40551279 | rs4957313 | 40557969 | rs10941516 | 0.397 |
| 5 | 40551279 | rs4957313 | 40564436 | rs7718129  | 0.429 |
| 5 | 40551279 | rs4957313 | 40597115 | rs11750156 | 0.908 |
| 5 | 40551279 | rs4957313 | 40605710 | rs10055860 | 0.916 |
| 5 | 40551279 | rs4957313 | 40605832 | rs10055946 | 0.415 |
| 5 | 40551279 | rs4957313 | 40614679 | rs1122433  | 0.779 |
| 5 | 40551774 | rs6896604 | 40553088 | rs6866402  | 1.000 |
| 5 | 40551774 | rs6896604 | 40553482 | rs4957317  | 0.930 |
| 5 | 40551774 | rs6896604 | 40557969 | rs10941516 | 0.383 |
| 5 | 40551774 | rs6896604 | 40564436 | rs7718129  | 0.430 |
| 5 | 40551774 | rs6896604 | 40597115 | rs11750156 | 0.888 |
| 5 | 40551774 | rs6896604 | 40605710 | rs10055860 | 0.905 |
| 5 | 40551774 | rs6896604 | 40605832 | rs10055946 | 0.416 |
| 5 | 40551774 | rs6896604 | 40614679 | rs1122433  | 0.796 |
| 5 | 40551774 | rs6896604 | 40637966 | rs2135330  | 0.247 |
| 5 | 40553088 | rs6866402 | 40553482 | rs4957317  | 0.930 |
| 5 | 40553088 | rs6866402 | 40557969 | rs10941516 | 0.383 |
| 5 | 40553088 | rs6866402 | 40564436 | rs7718129  | 0.429 |
| 5 | 40553088 | rs6866402 | 40597115 | rs11750156 | 0.888 |

|   |          |            |          |            |       |
|---|----------|------------|----------|------------|-------|
| 5 | 40553088 | rs6866402  | 40605710 | rs10055860 | 0.904 |
| 5 | 40553088 | rs6866402  | 40605832 | rs10055946 | 0.415 |
| 5 | 40553088 | rs6866402  | 40614679 | rs1122433  | 0.795 |
| 5 | 40553088 | rs6866402  | 40637966 | rs2135330  | 0.246 |
| 5 | 40553088 | rs6866402  | 40642051 | rs10473203 | 0.773 |
| 5 | 40553482 | rs4957317  | 40557969 | rs10941516 | 0.416 |
| 5 | 40553482 | rs4957317  | 40564436 | rs7718129  | 0.399 |
| 5 | 40553482 | rs4957317  | 40597115 | rs11750156 | 0.861 |
| 5 | 40553482 | rs4957317  | 40605710 | rs10055860 | 0.866 |
| 5 | 40553482 | rs4957317  | 40605832 | rs10055946 | 0.387 |
| 5 | 40553482 | rs4957317  | 40614679 | rs1122433  | 0.735 |
| 5 | 40553482 | rs4957317  | 40637966 | rs2135330  | 0.231 |
| 5 | 40553482 | rs4957317  | 40642051 | rs10473203 | 0.750 |
| 5 | 40557969 | rs10941516 | 40597115 | rs11750156 | 0.347 |
| 5 | 40557969 | rs10941516 | 40605710 | rs10055860 | 0.354 |
| 5 | 40557969 | rs10941516 | 40614679 | rs1122433  | 0.254 |
| 5 | 40557969 | rs10941516 | 40642051 | rs10473203 | 0.326 |
| 5 | 40564436 | rs7718129  | 40597115 | rs11750156 | 0.450 |
| 5 | 40564436 | rs7718129  | 40605710 | rs10055860 | 0.429 |
| 5 | 40564436 | rs7718129  | 40605832 | rs10055946 | 0.986 |
| 5 | 40564436 | rs7718129  | 40614679 | rs1122433  | 0.456 |
| 5 | 40564436 | rs7718129  | 40637966 | rs2135330  | 0.557 |
| 5 | 40564436 | rs7718129  | 40642051 | rs10473203 | 0.377 |
| 5 | 40597115 | rs11750156 | 40605710 | rs10055860 | 0.970 |
| 5 | 40597115 | rs11750156 | 40605832 | rs10055946 | 0.452 |
| 5 | 40597115 | rs11750156 | 40614679 | rs1122433  | 0.886 |
| 5 | 40597115 | rs11750156 | 40637966 | rs2135330  | 0.266 |
| 5 | 40597115 | rs11750156 | 40642051 | rs10473203 | 0.874 |
| 5 | 40605710 | rs10055860 | 40605832 | rs10055946 | 0.431 |
| 5 | 40605710 | rs10055860 | 40614679 | rs1122433  | 0.861 |
| 5 | 40605710 | rs10055860 | 40637966 | rs2135330  | 0.233 |
| 5 | 40605710 | rs10055860 | 40642051 | rs10473203 | 0.844 |
| 5 | 40605832 | rs10055946 | 40614679 | rs1122433  | 0.461 |
| 5 | 40605832 | rs10055946 | 40637966 | rs2135330  | 0.571 |
| 5 | 40605832 | rs10055946 | 40642051 | rs10473203 | 0.394 |
| 5 | 40614679 | rs1122433  | 40637966 | rs2135330  | 0.243 |
| 5 | 40614679 | rs1122433  | 40642051 | rs10473203 | 0.772 |
| 5 | 40637966 | rs2135330  | 40642051 | rs10473203 | 0.341 |
| 5 | 41646914 | rs7733683  | 41656596 | rs11739609 | 0.947 |
| 5 | 51854141 | rs12514062 | 51860390 | rs7723161  | 0.934 |
| 5 | 52489623 | rs117931   | 52531439 | rs254481   | 0.625 |
| 5 | 52514472 | rs2112876  | 52609049 | rs37809    | 0.486 |
| 5 | 53656359 | rs4141522  | 53690381 | rs968813   | 0.642 |
| 5 | 53656359 | rs4141522  | 53708606 | rs12515791 | 0.639 |

|   |          |            |          |            |       |
|---|----------|------------|----------|------------|-------|
| 5 | 53690381 | rs968813   | 53708606 | rs12515791 | 0.514 |
| 5 | 54126295 | rs10045790 | 54129781 | rs4380600  | 0.403 |
| 5 | 54300768 | rs1023671  | 54310631 | rs3822313  | 0.992 |
| 5 | 55687334 | rs1997522  | 55689646 | rs6892034  | 0.961 |
| 5 | 55687334 | rs1997522  | 55692632 | rs1645483  | 0.290 |
| 5 | 55689646 | rs6892034  | 55692632 | rs1645483  | 0.270 |
| 5 | 56385936 | rs831793   | 56386202 | rs865553   | 0.639 |
| 5 | 56950018 | rs4699908  | 56965947 | rs2968223  | 0.218 |
| 5 | 59199583 | rs10042020 | 59200750 | rs1003219  | 1.000 |
| 5 | 60131029 | rs6449503  | 60332313 | rs290505   | 0.210 |
| 5 | 60131029 | rs6449503  | 60551551 | rs581318   | 0.258 |
| 5 | 60332313 | rs290505   | 60547184 | rs11954384 | 0.437 |
| 5 | 60332313 | rs290505   | 60884502 | rs4582229  | 0.397 |
| 5 | 60547184 | rs11954384 | 60884502 | rs4582229  | 0.401 |
| 5 | 61597678 | rs971965   | 61608746 | rs13189446 | 0.913 |
| 5 | 61597678 | rs971965   | 61665296 | rs16890651 | 0.889 |
| 5 | 61597678 | rs971965   | 61852899 | rs40290    | 0.693 |
| 5 | 61608746 | rs13189446 | 61665296 | rs16890651 | 0.822 |
| 5 | 61608746 | rs13189446 | 61852899 | rs40290    | 0.649 |
| 5 | 61665296 | rs16890651 | 61852899 | rs40290    | 0.745 |
| 5 | 62105308 | rs2591786  | 62109454 | rs7715472  | 0.363 |
| 5 | 62105308 | rs2591786  | 62110935 | rs2642781  | 0.361 |
| 5 | 62109454 | rs7715472  | 62110935 | rs2642781  | 0.981 |
| 5 | 63257177 | rs17484704 | 63639566 | rs1374031  | 0.274 |
| 5 | 63426154 | rs168558   | 63532936 | rs1389864  | 0.973 |
| 5 | 63426154 | rs168558   | 63639566 | rs1374031  | 0.590 |
| 5 | 63532936 | rs1389864  | 63639566 | rs1374031  | 0.571 |
| 5 | 64643239 | rs6449781  | 64676668 | rs2640717  | 0.470 |
| 5 | 64643239 | rs6449781  | 64743875 | rs9291837  | 0.638 |
| 5 | 64643239 | rs6449781  | 64769683 | rs2047064  | 0.592 |
| 5 | 64676668 | rs2640717  | 64743875 | rs9291837  | 0.521 |
| 5 | 64676668 | rs2640717  | 64769683 | rs2047064  | 0.466 |
| 5 | 64743875 | rs9291837  | 64769683 | rs2047064  | 0.867 |
| 5 | 66506805 | rs2042945  | 66514485 | rs2230524  | 0.561 |
| 5 | 67589527 | rs6893676  | 67605358 | rs2302976  | 0.914 |
| 5 | 67589527 | rs6893676  | 67645164 | rs440292   | 0.275 |
| 5 | 67605358 | rs2302976  | 67645164 | rs440292   | 0.294 |
| 5 | 67640384 | rs695166   | 67645164 | rs440292   | 0.570 |
| 5 | 68078239 | rs6891897  | 68100520 | rs2451819  | 0.360 |
| 5 | 68100520 | rs2451819  | 68166377 | rs1427906  | 0.223 |
| 5 | 71402652 | rs1217778  | 71402819 | rs1217782  | 0.924 |
| 5 | 71802603 | rs4703908  | 71873362 | rs406813   | 0.302 |
| 5 | 77093252 | rs254378   | 77115613 | rs254411   | 0.299 |
| 5 | 78141103 | rs10514108 | 78142127 | rs12054837 | 0.409 |

|   |          |            |          |            |       |
|---|----------|------------|----------|------------|-------|
| 5 | 78303950 | rs12153089 | 78304645 | rs6453423  | 1.000 |
| 5 | 78303950 | rs12153089 | 78306219 | rs6897944  | 0.973 |
| 5 | 78304645 | rs6453423  | 78306219 | rs6897944  | 0.975 |
| 5 | 78735782 | rs2404150  | 78749824 | rs7709092  | 0.993 |
| 5 | 82783992 | rs33596    | 82795773 | rs28296    | 0.867 |
| 5 | 84576005 | rs6452647  | 84639708 | rs2931116  | 0.827 |
| 5 | 84576005 | rs6452647  | 84729376 | rs307311   | 0.632 |
| 5 | 84639708 | rs2931116  | 84729376 | rs307311   | 0.566 |
| 5 | 84729376 | rs307311   | 84869510 | rs467359   | 0.208 |
| 5 | 85267170 | rs2898534  | 85303222 | rs12521073 | 0.273 |
| 5 | 88338086 | rs4916663  | 88355663 | rs6452806  | 0.768 |
| 5 | 88338086 | rs4916663  | 88364322 | rs1427967  | 0.902 |
| 5 | 88338086 | rs4916663  | 88364920 | rs13185032 | 0.933 |
| 5 | 88338086 | rs4916663  | 88370749 | rs1159666  | 0.731 |
| 5 | 88338086 | rs4916663  | 88409794 | rs9986241  | 0.807 |
| 5 | 88338086 | rs4916663  | 88428880 | rs4916669  | 0.834 |
| 5 | 88338086 | rs4916663  | 88452110 | rs9293511  | 0.862 |
| 5 | 88355663 | rs6452806  | 88364322 | rs1427967  | 0.808 |
| 5 | 88355663 | rs6452806  | 88364920 | rs13185032 | 0.772 |
| 5 | 88355663 | rs6452806  | 88370749 | rs1159666  | 0.964 |
| 5 | 88355663 | rs6452806  | 88409794 | rs9986241  | 0.791 |
| 5 | 88355663 | rs6452806  | 88428880 | rs4916669  | 0.746 |
| 5 | 88355663 | rs6452806  | 88452110 | rs9293511  | 0.736 |
| 5 | 88364322 | rs1427967  | 88364920 | rs13185032 | 0.971 |
| 5 | 88364322 | rs1427967  | 88370749 | rs1159666  | 0.839 |
| 5 | 88364322 | rs1427967  | 88409794 | rs9986241  | 0.882 |
| 5 | 88364322 | rs1427967  | 88428880 | rs4916669  | 0.893 |
| 5 | 88364322 | rs1427967  | 88452110 | rs9293511  | 0.882 |
| 5 | 88364920 | rs13185032 | 88370749 | rs1159666  | 0.801 |
| 5 | 88364920 | rs13185032 | 88409794 | rs9986241  | 0.859 |
| 5 | 88364920 | rs13185032 | 88428880 | rs4916669  | 0.866 |
| 5 | 88364920 | rs13185032 | 88452110 | rs9293511  | 0.893 |
| 5 | 88370749 | rs1159666  | 88409794 | rs9986241  | 0.824 |
| 5 | 88370749 | rs1159666  | 88428880 | rs4916669  | 0.761 |
| 5 | 88370749 | rs1159666  | 88452110 | rs9293511  | 0.749 |
| 5 | 88409794 | rs9986241  | 88428880 | rs4916669  | 0.926 |
| 5 | 88409794 | rs9986241  | 88452110 | rs9293511  | 0.899 |
| 5 | 88428880 | rs4916669  | 88452110 | rs9293511  | 0.970 |
| 5 | 88823450 | rs1852721  | 88824241 | rs6452825  | 0.284 |
| 5 | 89312242 | rs10474312 | 89400075 | rs818944   | 0.968 |
| 5 | 89312242 | rs10474312 | 89425015 | rs157559   | 0.433 |
| 5 | 89312242 | rs10474312 | 89440658 | rs924628   | 0.869 |
| 5 | 89400075 | rs818944   | 89425015 | rs157559   | 0.418 |
| 5 | 89400075 | rs818944   | 89440658 | rs924628   | 0.901 |

|   |          |            |          |            |       |
|---|----------|------------|----------|------------|-------|
| 5 | 89425015 | rs157559   | 89440658 | rs924628   | 0.433 |
| 5 | 93045806 | rs10060331 | 93147477 | rs2344918  | 0.376 |
| 5 | 93147477 | rs2344918  | 93574048 | rs7378943  | 0.296 |
| 5 | 93807278 | rs13178274 | 93821888 | rs9285014  | 0.398 |
| 5 | 95875079 | rs17473575 | 95907773 | rs6877870  | 0.227 |
| 5 | 96104065 | rs26503    | 96146211 | rs42398    | 0.270 |
| 5 | 96104065 | rs26503    | 96191820 | rs34735    | 0.222 |
| 5 | 96146211 | rs42398    | 96191820 | rs34735    | 0.411 |
| 5 | 96701855 | rs7701806  | 96783901 | rs291827   | 0.235 |
| 5 | 98802139 | rs1916599  | 98802264 | rs2511902  | 0.706 |
| 5 | 98802139 | rs1916599  | 98821231 | rs2461991  | 1.000 |
| 5 | 98802139 | rs1916599  | 98848971 | rs2461953  | 0.696 |
| 5 | 98802139 | rs1916599  | 98959050 | rs681634   | 0.562 |
| 5 | 98802139 | rs1916599  | 99080579 | rs1462419  | 0.423 |
| 5 | 98802264 | rs2511902  | 98821231 | rs2461991  | 0.706 |
| 5 | 98802264 | rs2511902  | 98848971 | rs2461953  | 0.957 |
| 5 | 98802264 | rs2511902  | 98959050 | rs681634   | 0.768 |
| 5 | 98802264 | rs2511902  | 99080579 | rs1462419  | 0.603 |
| 5 | 98802264 | rs2511902  | 99181038 | rs6878343  | 0.229 |
| 5 | 98821231 | rs2461991  | 98848971 | rs2461953  | 0.696 |
| 5 | 98821231 | rs2461991  | 98959050 | rs681634   | 0.562 |
| 5 | 98821231 | rs2461991  | 99080579 | rs1462419  | 0.423 |
| 5 | 98848971 | rs2461953  | 98959050 | rs681634   | 0.743 |
| 5 | 98848971 | rs2461953  | 99080579 | rs1462419  | 0.578 |
| 5 | 98848971 | rs2461953  | 99181038 | rs6878343  | 0.211 |
| 5 | 98959050 | rs681634   | 99080579 | rs1462419  | 0.744 |
| 5 | 98959050 | rs681634   | 99181038 | rs6878343  | 0.201 |
| 5 | 99080579 | rs1462419  | 99181038 | rs6878343  | 0.353 |
| 5 | 99152807 | rs7447852  | 99172882 | rs11241243 | 1.000 |
| 5 | 99152807 | rs7447852  | 99249586 | rs3844092  | 0.961 |
| 5 | 99152807 | rs7447852  | 99249653 | rs3844091  | 0.960 |
| 5 | 99152807 | rs7447852  | 99249738 | rs4455602  | 0.961 |
| 5 | 99152807 | rs7447852  | 99278995 | rs2924611  | 0.259 |
| 5 | 99172882 | rs11241243 | 99249586 | rs3844092  | 0.960 |
| 5 | 99172882 | rs11241243 | 99249653 | rs3844091  | 0.959 |
| 5 | 99172882 | rs11241243 | 99249738 | rs4455602  | 0.960 |
| 5 | 99172882 | rs11241243 | 99278995 | rs2924611  | 0.259 |
| 5 | 99181038 | rs6878343  | 99249586 | rs3844092  | 0.214 |
| 5 | 99181038 | rs6878343  | 99249653 | rs3844091  | 0.210 |
| 5 | 99181038 | rs6878343  | 99249738 | rs4455602  | 0.214 |
| 5 | 99249586 | rs3844092  | 99249653 | rs3844091  | 1.000 |
| 5 | 99249586 | rs3844092  | 99249738 | rs4455602  | 1.000 |
| 5 | 99249586 | rs3844092  | 99278995 | rs2924611  | 0.248 |
| 5 | 99249653 | rs3844091  | 99249738 | rs4455602  | 1.000 |

|   |           |            |           |            |       |
|---|-----------|------------|-----------|------------|-------|
| 5 | 99249653  | rs3844091  | 99278995  | rs2924611  | 0.248 |
| 5 | 99249738  | rs4455602  | 99278995  | rs2924611  | 0.248 |
| 5 | 99332774  | rs10054412 | 99350463  | rs10070116 | 0.426 |
| 5 | 99332774  | rs10054412 | 99379483  | rs11948786 | 0.366 |
| 5 | 99332774  | rs10054412 | 99411368  | rs17164397 | 0.273 |
| 5 | 99350463  | rs10070116 | 99379483  | rs11948786 | 0.341 |
| 5 | 99350463  | rs10070116 | 99411368  | rs17164397 | 0.270 |
| 5 | 99379483  | rs11948786 | 99411368  | rs17164397 | 0.858 |
| 5 | 99379483  | rs11948786 | 99671978  | rs1824780  | 0.230 |
| 5 | 99411368  | rs17164397 | 99671978  | rs1824780  | 0.228 |
| 5 | 100096374 | rs2120913  | 100100985 | rs279095   | 0.957 |
| 5 | 100271404 | rs1833862  | 100518871 | rs2048525  | 0.521 |
| 5 | 101842508 | rs17333350 | 102517410 | rs34767    | 0.214 |
| 5 | 102361943 | rs3756583  | 102466190 | rs34823    | 0.439 |
| 5 | 102361943 | rs3756583  | 102517410 | rs34767    | 0.411 |
| 5 | 102466190 | rs34823    | 102517410 | rs34767    | 0.962 |
| 5 | 103415779 | rs6887182  | 103445285 | rs1420864  | 0.672 |
| 5 | 103415779 | rs6887182  | 103482656 | rs2707407  | 0.493 |
| 5 | 103415779 | rs6887182  | 103492704 | rs17156145 | 0.444 |
| 5 | 103445285 | rs1420864  | 103482656 | rs2707407  | 0.681 |
| 5 | 103445285 | rs1420864  | 103492704 | rs17156145 | 0.651 |
| 5 | 103482656 | rs2707407  | 103492704 | rs17156145 | 0.904 |
| 5 | 105472939 | rs11739968 | 105646376 | rs11242576 | 0.201 |
| 5 | 105472939 | rs11739968 | 105649051 | rs7718256  | 0.436 |
| 5 | 105646376 | rs11242576 | 105649051 | rs7718256  | 0.655 |
| 5 | 106982444 | rs17160261 | 107039611 | rs13361436 | 0.436 |
| 5 | 109072457 | rs6897334  | 109203522 | rs7711326  | 0.224 |
| 5 | 109072457 | rs6897334  | 109220135 | rs2007136  | 0.214 |
| 5 | 109072457 | rs6897334  | 109223156 | rs1368356  | 0.213 |
| 5 | 109203522 | rs7711326  | 109220135 | rs2007136  | 0.919 |
| 5 | 109203522 | rs7711326  | 109223156 | rs1368356  | 0.949 |
| 5 | 109203522 | rs7711326  | 109258634 | rs245243   | 0.704 |
| 5 | 109220135 | rs2007136  | 109223156 | rs1368356  | 0.949 |
| 5 | 109220135 | rs2007136  | 109258634 | rs245243   | 0.646 |
| 5 | 109223156 | rs1368356  | 109258634 | rs245243   | 0.712 |
| 5 | 109272818 | rs42924    | 109279160 | rs6862355  | 0.454 |
| 5 | 114939464 | rs256989   | 114968099 | rs10079000 | 0.865 |
| 5 | 114939464 | rs256989   | 115001019 | rs10055339 | 0.769 |
| 5 | 114968099 | rs10079000 | 115001019 | rs10055339 | 0.891 |
| 5 | 116915922 | rs265899   | 116916065 | rs265900   | 1.000 |
| 5 | 116915922 | rs265899   | 117001959 | rs371616   | 0.605 |
| 5 | 116916065 | rs265900   | 117001959 | rs371616   | 0.605 |
| 5 | 116952228 | rs267074   | 117001959 | rs371616   | 0.279 |
| 5 | 119715531 | rs12658673 | 119796305 | rs6595233  | 0.930 |



|   |           |            |           |            |       |
|---|-----------|------------|-----------|------------|-------|
| 5 | 121910770 | rs9327254  | 121923676 | rs4438871  | 0.959 |
| 5 | 123176800 | rs6889859  | 123196141 | rs3909329  | 0.219 |
| 5 | 123448411 | rs10055109 | 123501287 | rs1457690  | 0.214 |
| 5 | 123981123 | rs12520962 | 123988346 | rs6871217  | 0.936 |
| 5 | 125337442 | rs17165007 | 125354492 | rs4836240  | 0.521 |
| 5 | 130442705 | rs13361165 | 131350393 | rs77938    | 0.252 |
| 5 | 132236262 | rs803223   | 132258930 | rs3798128  | 0.239 |
| 5 | 132697894 | rs10515458 | 132732003 | rs4958122  | 0.324 |
| 5 | 132732003 | rs4958122  | 132756827 | rs250856   | 0.279 |
| 5 | 133554588 | rs7735912  | 133731491 | rs17167478 | 0.253 |
| 5 | 134896238 | rs3860110  | 134896540 | rs2344485  | 0.581 |
| 5 | 135036890 | rs7709847  | 135037127 | rs7710084  | 1.000 |
| 5 | 135036890 | rs7709847  | 135047070 | rs6877327  | 0.743 |
| 5 | 135036890 | rs7709847  | 135056220 | rs4288109  | 0.855 |
| 5 | 135036890 | rs7709847  | 135056573 | rs11242261 | 0.902 |
| 5 | 135037127 | rs7710084  | 135047070 | rs6877327  | 0.743 |
| 5 | 135037127 | rs7710084  | 135056220 | rs4288109  | 0.855 |
| 5 | 135037127 | rs7710084  | 135056573 | rs11242261 | 0.902 |
| 5 | 135047070 | rs6877327  | 135056220 | rs4288109  | 0.620 |
| 5 | 135047070 | rs6877327  | 135056573 | rs11242261 | 0.727 |
| 5 | 135056220 | rs4288109  | 135056573 | rs11242261 | 0.877 |
| 5 | 135264117 | rs17169348 | 135325449 | rs17598926 | 0.369 |
| 5 | 135693248 | rs3822748  | 135745093 | rs346643   | 0.699 |
| 5 | 137735214 | rs757647   | 137736333 | rs4835678  | 0.281 |
| 5 | 143380861 | rs312634   | 143398614 | rs309328   | 0.980 |
| 5 | 143884468 | rs34463305 | 143900921 | rs6870605  | 0.618 |
| 5 | 143884468 | rs34463305 | 144338909 | rs11741672 | 0.349 |
| 5 | 143900921 | rs6870605  | 144338909 | rs11741672 | 0.272 |
| 5 | 145190785 | rs11745319 | 145191281 | rs385175   | 0.966 |
| 5 | 145190785 | rs11745319 | 145191308 | rs417215   | 0.964 |
| 5 | 145191281 | rs385175   | 145191308 | rs417215   | 1.000 |
| 5 | 145582091 | rs17104321 | 145593015 | rs17104331 | 0.454 |
| 5 | 145582091 | rs17104321 | 145630790 | rs17104362 | 0.906 |
| 5 | 145593015 | rs17104331 | 145630790 | rs17104362 | 0.390 |
| 5 | 145752014 | rs997011   | 145753403 | rs6580417  | 0.572 |
| 5 | 145881372 | rs7717315  | 145899863 | rs6881391  | 0.572 |
| 5 | 146014684 | rs460781   | 146014728 | rs460413   | 0.800 |
| 5 | 146014684 | rs460781   | 146023125 | rs458164   | 0.563 |
| 5 | 146014684 | rs460781   | 146027384 | rs182697   | 0.530 |
| 5 | 146014684 | rs460781   | 146034170 | rs462706   | 0.563 |
| 5 | 146014684 | rs460781   | 146034654 | rs464459   | 0.563 |
| 5 | 146014728 | rs460413   | 146023125 | rs458164   | 0.446 |
| 5 | 146014728 | rs460413   | 146027384 | rs182697   | 0.451 |
| 5 | 146014728 | rs460413   | 146034170 | rs462706   | 0.446 |

|   |           |            |           |            |       |
|---|-----------|------------|-----------|------------|-------|
| 5 | 146014728 | rs460413   | 146034654 | rs464459   | 0.446 |
| 5 | 146023125 | rs458164   | 146027384 | rs182697   | 0.876 |
| 5 | 146023125 | rs458164   | 146034170 | rs462706   | 1.000 |
| 5 | 146023125 | rs458164   | 146034654 | rs464459   | 1.000 |
| 5 | 146027384 | rs182697   | 146034170 | rs462706   | 0.876 |
| 5 | 146027384 | rs182697   | 146034654 | rs464459   | 0.876 |
| 5 | 146027384 | rs182697   | 146048554 | rs10061370 | 0.226 |
| 5 | 146027384 | rs182697   | 146049791 | rs2400228  | 0.223 |
| 5 | 146034170 | rs462706   | 146034654 | rs464459   | 1.000 |
| 5 | 146048554 | rs10061370 | 146049791 | rs2400228  | 0.948 |
| 5 | 146048554 | rs10061370 | 146060205 | rs7716683  | 0.229 |
| 5 | 146049791 | rs2400228  | 146060205 | rs7716683  | 0.255 |
| 5 | 146693780 | rs17106458 | 146696881 | rs10079191 | 0.910 |
| 5 | 146693780 | rs17106458 | 146703083 | rs6884181  | 0.990 |
| 5 | 146693780 | rs17106458 | 146708683 | rs918797   | 0.688 |
| 5 | 146693780 | rs17106458 | 146709417 | rs4705166  | 0.681 |
| 5 | 146693780 | rs17106458 | 146763849 | rs3805536  | 0.201 |
| 5 | 146696881 | rs10079191 | 146703083 | rs6884181  | 0.901 |
| 5 | 146696881 | rs10079191 | 146708683 | rs918797   | 0.699 |
| 5 | 146696881 | rs10079191 | 146709417 | rs4705166  | 0.691 |
| 5 | 146696881 | rs10079191 | 146763849 | rs3805536  | 0.213 |
| 5 | 146703083 | rs6884181  | 146708683 | rs918797   | 0.686 |
| 5 | 146703083 | rs6884181  | 146709417 | rs4705166  | 0.679 |
| 5 | 146708683 | rs918797   | 146709417 | rs4705166  | 0.986 |
| 5 | 146755668 | rs2288806  | 146759060 | rs17550470 | 0.215 |
| 5 | 146755668 | rs2288806  | 146759414 | rs12655364 | 0.836 |
| 5 | 146755668 | rs2288806  | 146763849 | rs3805536  | 0.801 |
| 5 | 146759060 | rs17550470 | 146759414 | rs12655364 | 0.223 |
| 5 | 146759414 | rs12655364 | 146763849 | rs3805536  | 0.666 |
| 5 | 151436036 | rs154696   | 151443684 | rs29849    | 0.351 |
| 5 | 151443684 | rs29849    | 151447865 | rs159822   | 0.367 |
| 5 | 151892892 | rs4475248  | 152044626 | rs17565505 | 0.389 |
| 5 | 152044626 | rs17565505 | 152307861 | rs4958596  | 0.348 |
| 5 | 152469215 | rs17578068 | 152488109 | rs13173299 | 0.430 |
| 5 | 153090050 | rs10477084 | 153123087 | rs7711124  | 0.531 |
| 5 | 153090050 | rs10477084 | 153267157 | rs898709   | 0.247 |
| 5 | 153090050 | rs10477084 | 153280408 | rs2614123  | 0.251 |
| 5 | 153123087 | rs7711124  | 153247946 | rs2614125  | 0.272 |
| 5 | 153123087 | rs7711124  | 153267157 | rs898709   | 0.498 |
| 5 | 153123087 | rs7711124  | 153280408 | rs2614123  | 0.503 |
| 5 | 153247946 | rs2614125  | 153267157 | rs898709   | 0.374 |
| 5 | 153247946 | rs2614125  | 153280408 | rs2614123  | 0.365 |
| 5 | 153267157 | rs898709   | 153280408 | rs2614123  | 0.976 |
| 5 | 157170036 | rs3777059  | 157199237 | rs2650359  | 0.590 |

|   |           |            |           |            |       |
|---|-----------|------------|-----------|------------|-------|
| 5 | 157738982 | rs10065017 | 157744807 | rs17055538 | 0.958 |
| 5 | 158098219 | rs2420211  | 158159232 | rs1549883  | 0.824 |
| 5 | 158098219 | rs2420211  | 158192277 | rs4704967  | 0.644 |
| 5 | 158098219 | rs2420211  | 158242261 | rs10054046 | 0.644 |
| 5 | 158137003 | rs1368298  | 158193834 | rs10056564 | 0.720 |
| 5 | 158159232 | rs1549883  | 158192277 | rs4704967  | 0.733 |
| 5 | 158159232 | rs1549883  | 158242261 | rs10054046 | 0.801 |
| 5 | 158192277 | rs4704967  | 158193834 | rs10056564 | 0.274 |
| 5 | 158192277 | rs4704967  | 158242261 | rs10054046 | 0.585 |
| 5 | 158600287 | rs194229   | 158612157 | rs3846687  | 0.394 |
| 5 | 159908441 | rs9313851  | 159912956 | rs7707116  | 0.699 |
| 5 | 160512672 | rs10515822 | 160545772 | rs455707   | 0.208 |
| 5 | 160512672 | rs10515822 | 160546334 | rs456582   | 0.208 |
| 5 | 160512672 | rs10515822 | 160562804 | rs609651   | 0.244 |
| 5 | 160512672 | rs10515822 | 160581664 | rs17059065 | 0.244 |
| 5 | 160545772 | rs455707   | 160546334 | rs456582   | 1.000 |
| 5 | 160562804 | rs609651   | 160581664 | rs17059065 | 1.000 |
| 5 | 162581271 | rs2913561  | 162592782 | rs2059796  | 0.353 |
| 5 | 165727152 | rs1392384  | 165771085 | rs1353943  | 0.775 |
| 5 | 168162396 | rs12659534 | 168177820 | rs1109106  | 0.228 |
| 5 | 170130357 | rs10475958 | 170130444 | rs10475959 | 0.973 |
| 5 | 171436401 | rs17074274 | 171437235 | rs9313575  | 0.723 |
| 5 | 171884506 | rs1368430  | 171884740 | rs11741273 | 0.906 |
| 5 | 180206066 | rs41330745 | 180207008 | rs34327863 | 1.000 |
| 6 | 1966707   | rs9392353  | 2000676   | rs11242735 | 0.621 |
| 6 | 2189720   | rs3823287  | 2210343   | rs9328087  | 0.573 |
| 6 | 2189720   | rs3823287  | 2292807   | rs2479008  | 0.559 |
| 6 | 2189720   | rs3823287  | 2313641   | rs4413658  | 0.273 |
| 6 | 2210343   | rs9328087  | 2292807   | rs2479008  | 0.977 |
| 6 | 2292807   | rs2479008  | 2313641   | rs4413658  | 0.216 |
| 6 | 3298526   | rs7747817  | 3299260   | rs1887843  | 0.500 |
| 6 | 9837105   | rs1410364  | 9859151   | rs7765635  | 0.928 |
| 6 | 14692375  | rs6459366  | 14715101  | rs857464   | 0.553 |
| 6 | 14844570  | rs2500065  | 14844629  | rs9396529  | 0.957 |
| 6 | 14844570  | rs2500065  | 14847961  | rs9382996  | 0.499 |
| 6 | 14844629  | rs9396529  | 14847961  | rs9382996  | 0.490 |
| 6 | 17045787  | rs7382853  | 17054324  | rs1570241  | 0.418 |
| 6 | 18536837  | rs568108   | 18553773  | rs577287   | 0.969 |
| 6 | 19814250  | rs9358264  | 19847922  | rs9460408  | 0.604 |
| 6 | 20435828  | rs9366344  | 20452975  | rs9358331  | 0.649 |
| 6 | 20435828  | rs9366344  | 20453095  | rs9356730  | 0.649 |
| 6 | 20452975  | rs9358331  | 20453095  | rs9356730  | 1.000 |
| 6 | 21227109  | rs6456397  | 21243137  | rs2493869  | 0.225 |
| 6 | 21227109  | rs6456397  | 21247079  | rs9295495  | 0.979 |

|   |          |            |          |           |       |
|---|----------|------------|----------|-----------|-------|
| 6 | 21243137 | rs2493869  | 21247079 | rs9295495 | 0.226 |
| 6 | 21483974 | rs9366399  | 21492592 | rs9466056 | 0.251 |
| 6 | 22625935 | rs7741889  | 22626538 | rs6927431 | 0.396 |
| 6 | 22625935 | rs7741889  | 22627328 | rs7748467 | 1.000 |
| 6 | 22625935 | rs7741889  | 22629109 | rs9393306 | 0.364 |
| 6 | 22626538 | rs6927431  | 22627328 | rs7748467 | 0.400 |
| 6 | 22626538 | rs6927431  | 22629109 | rs9393306 | 0.939 |
| 6 | 22627328 | rs7748467  | 22629109 | rs9393306 | 0.367 |
| 6 | 23555091 | rs199024   | 23572989 | rs191815  | 0.408 |
| 6 | 23555091 | rs199024   | 23584367 | rs187936  | 0.290 |
| 6 | 23555091 | rs199024   | 23591265 | rs199067  | 0.287 |
| 6 | 23555091 | rs199024   | 23595836 | rs199059  | 0.379 |
| 6 | 23572989 | rs191815   | 23584367 | rs187936  | 0.766 |
| 6 | 23572989 | rs191815   | 23591265 | rs199067  | 0.759 |
| 6 | 23572989 | rs191815   | 23595836 | rs199059  | 0.883 |
| 6 | 23584367 | rs187936   | 23591265 | rs199067  | 1.000 |
| 6 | 23584367 | rs187936   | 23595836 | rs199059  | 0.835 |
| 6 | 23591265 | rs199067   | 23595836 | rs199059  | 0.827 |
| 6 | 25070407 | rs393228   | 25071608 | rs1739326 | 1.000 |
| 6 | 26319374 | rs16891417 | 26337127 | rs2143345 | 0.374 |
| 6 | 26488524 | rs3757142  | 26489295 | rs3757149 | 0.765 |
| 6 | 29739723 | rs3130252  | 29786499 | rs1610593 | 0.333 |
| 6 | 29739723 | rs3130252  | 29790880 | rs1627465 | 0.332 |
| 6 | 29739723 | rs3130252  | 30239328 | rs9261536 | 0.344 |
| 6 | 29786499 | rs1610593  | 29790880 | rs1627465 | 0.978 |
| 6 | 29786499 | rs1610593  | 29811802 | rs9258205 | 0.242 |
| 6 | 29790880 | rs1627465  | 29811802 | rs9258205 | 0.257 |
| 6 | 31222724 | rs2240063  | 31241488 | rs2106074 | 0.216 |
| 6 | 31468074 | rs2596517  | 31526103 | rs2523693 | 0.273 |
| 6 | 33682987 | rs444697   | 33727986 | rs1408711 | 0.332 |
| 6 | 35117174 | rs3800426  | 35117273 | rs2820223 | 0.585 |
| 6 | 35919641 | rs9470131  | 35929492 | rs9470139 | 1.000 |
| 6 | 35919641 | rs9470131  | 35943016 | rs9462141 | 1.000 |
| 6 | 35929492 | rs9470139  | 35943016 | rs9462141 | 1.000 |
| 6 | 36418874 | rs1476017  | 36422250 | rs2015973 | 0.971 |
| 6 | 40379505 | rs1018631  | 40381435 | rs4714329 | 0.808 |
| 6 | 40379505 | rs1018631  | 40400445 | rs715831  | 0.589 |
| 6 | 40381435 | rs4714329  | 40400445 | rs715831  | 0.602 |
| 6 | 40534831 | rs2436731  | 40538982 | rs1433725 | 0.909 |
| 6 | 40632698 | rs7738344  | 40695765 | rs1771294 | 0.406 |
| 6 | 41118346 | rs9369260  | 41122198 | rs6903444 | 0.272 |
| 6 | 41122198 | rs6903444  | 41270869 | rs4711658 | 0.390 |
| 6 | 44747162 | rs11755164 | 45008231 | rs3799986 | 0.329 |
| 6 | 44747162 | rs11755164 | 45061736 | rs1329716 | 0.224 |

|   |          |            |          |            |       |
|---|----------|------------|----------|------------|-------|
| 6 | 44747162 | rs11755164 | 45437467 | rs1852986  | 0.294 |
| 6 | 45008231 | rs3799986  | 45061736 | rs1329716  | 0.498 |
| 6 | 45008231 | rs3799986  | 45437467 | rs1852986  | 0.725 |
| 6 | 45061736 | rs1329716  | 45437467 | rs1852986  | 0.541 |
| 6 | 46077981 | rs3777618  | 46083313 | rs3777622  | 0.960 |
| 6 | 46311588 | rs2584076  | 46391881 | rs16874575 | 0.233 |
| 6 | 46939731 | rs630033   | 46940057 | rs628638   | 1.000 |
| 6 | 47018374 | rs2077055  | 47047792 | rs1413933  | 0.769 |
| 6 | 50873311 | rs2206272  | 51033290 | rs9473953  | 0.248 |
| 6 | 51426093 | rs4435937  | 51474621 | rs4339454  | 0.608 |
| 6 | 51426093 | rs4435937  | 51491555 | rs10948617 | 0.596 |
| 6 | 51426093 | rs4435937  | 51491628 | rs10948618 | 0.538 |
| 6 | 51426093 | rs4435937  | 51492968 | rs4644046  | 0.578 |
| 6 | 51426093 | rs4435937  | 51556765 | rs10948634 | 0.245 |
| 6 | 51426093 | rs4435937  | 51576003 | rs6930919  | 0.279 |
| 6 | 51474621 | rs4339454  | 51491555 | rs10948617 | 0.902 |
| 6 | 51474621 | rs4339454  | 51491628 | rs10948618 | 0.833 |
| 6 | 51474621 | rs4339454  | 51492968 | rs4644046  | 0.906 |
| 6 | 51474621 | rs4339454  | 51526189 | rs10948623 | 0.323 |
| 6 | 51474621 | rs4339454  | 51543535 | rs12214769 | 0.306 |
| 6 | 51474621 | rs4339454  | 51556765 | rs10948634 | 0.523 |
| 6 | 51474621 | rs4339454  | 51576003 | rs6930919  | 0.478 |
| 6 | 51474621 | rs4339454  | 51577180 | rs1108202  | 0.474 |
| 6 | 51491555 | rs10948617 | 51491628 | rs10948618 | 0.951 |
| 6 | 51491555 | rs10948617 | 51492968 | rs4644046  | 1.000 |
| 6 | 51491555 | rs10948617 | 51526189 | rs10948623 | 0.327 |
| 6 | 51491555 | rs10948617 | 51543535 | rs12214769 | 0.310 |
| 6 | 51491555 | rs10948617 | 51556765 | rs10948634 | 0.499 |
| 6 | 51491555 | rs10948617 | 51576003 | rs6930919  | 0.526 |
| 6 | 51491555 | rs10948617 | 51577180 | rs1108202  | 0.523 |
| 6 | 51491628 | rs10948618 | 51492968 | rs4644046  | 0.933 |
| 6 | 51491628 | rs10948618 | 51526189 | rs10948623 | 0.334 |
| 6 | 51491628 | rs10948618 | 51543535 | rs12214769 | 0.316 |
| 6 | 51491628 | rs10948618 | 51556765 | rs10948634 | 0.522 |
| 6 | 51491628 | rs10948618 | 51576003 | rs6930919  | 0.555 |
| 6 | 51491628 | rs10948618 | 51577180 | rs1108202  | 0.554 |
| 6 | 51492968 | rs4644046  | 51526189 | rs10948623 | 0.285 |
| 6 | 51492968 | rs4644046  | 51543535 | rs12214769 | 0.275 |
| 6 | 51492968 | rs4644046  | 51556765 | rs10948634 | 0.447 |
| 6 | 51492968 | rs4644046  | 51576003 | rs6930919  | 0.481 |
| 6 | 51492968 | rs4644046  | 51577180 | rs1108202  | 0.473 |
| 6 | 51526189 | rs10948623 | 51543535 | rs12214769 | 0.938 |
| 6 | 51526189 | rs10948623 | 51556765 | rs10948634 | 0.467 |
| 6 | 51526189 | rs10948623 | 51576003 | rs6930919  | 0.398 |

|   |          |            |          |            |       |
|---|----------|------------|----------|------------|-------|
| 6 | 51526189 | rs10948623 | 51577180 | rs1108202  | 0.392 |
| 6 | 51543535 | rs12214769 | 51556765 | rs10948634 | 0.493 |
| 6 | 51543535 | rs12214769 | 51576003 | rs6930919  | 0.419 |
| 6 | 51543535 | rs12214769 | 51577180 | rs1108202  | 0.413 |
| 6 | 51556765 | rs10948634 | 51576003 | rs6930919  | 0.859 |
| 6 | 51556765 | rs10948634 | 51577180 | rs1108202  | 0.855 |
| 6 | 51576003 | rs6930919  | 51577180 | rs1108202  | 1.000 |
| 6 | 52482782 | rs6917841  | 52516853 | rs2179803  | 0.584 |
| 6 | 53127129 | rs6913533  | 53128723 | rs6920669  | 0.848 |
| 6 | 55479622 | rs4626423  | 55503779 | rs9475342  | 0.770 |
| 6 | 55891681 | rs6459114  | 55902102 | rs6926110  | 0.603 |
| 6 | 56234901 | rs12525967 | 56254519 | rs2397214  | 0.212 |
| 6 | 66129666 | rs9453277  | 66132201 | rs12205154 | 0.990 |
| 6 | 66760624 | rs12202805 | 66875325 | rs3846808  | 0.960 |
| 6 | 66760624 | rs12202805 | 66946904 | rs9354391  | 0.372 |
| 6 | 66760624 | rs12202805 | 67061694 | rs17644076 | 0.576 |
| 6 | 66875325 | rs3846808  | 66946904 | rs9354391  | 0.358 |
| 6 | 66875325 | rs3846808  | 67061694 | rs17644076 | 0.571 |
| 6 | 66946904 | rs9354391  | 67061694 | rs17644076 | 0.379 |
| 6 | 67408933 | rs4710324  | 67459352 | rs4493734  | 0.530 |
| 6 | 67408933 | rs4710324  | 67577822 | rs9360234  | 0.413 |
| 6 | 67408933 | rs4710324  | 67586556 | rs9351600  | 0.331 |
| 6 | 67459352 | rs4493734  | 67586556 | rs9351600  | 0.216 |
| 6 | 67577822 | rs9360234  | 67586556 | rs9351600  | 0.831 |
| 6 | 67702785 | rs9360251  | 67721287 | rs9345935  | 0.217 |
| 6 | 67702785 | rs9360251  | 67728137 | rs6933579  | 0.799 |
| 6 | 67702785 | rs9360251  | 67822412 | rs2502279  | 0.307 |
| 6 | 67721287 | rs9345935  | 67728137 | rs6933579  | 0.245 |
| 6 | 67721287 | rs9345935  | 67738143 | rs4292508  | 0.246 |
| 6 | 67728137 | rs6933579  | 67822412 | rs2502279  | 0.403 |
| 6 | 68371284 | rs2747156  | 68398350 | rs2818113  | 0.753 |
| 6 | 68371284 | rs2747156  | 68414245 | rs2179964  | 0.719 |
| 6 | 68371284 | rs2747156  | 68421587 | rs9342657  | 0.244 |
| 6 | 68371284 | rs2747156  | 68428695 | rs2816902  | 0.590 |
| 6 | 68371284 | rs2747156  | 68454951 | rs2493374  | 0.413 |
| 6 | 68371284 | rs2747156  | 68562671 | rs9454286  | 0.221 |
| 6 | 68398350 | rs2818113  | 68414245 | rs2179964  | 0.962 |
| 6 | 68398350 | rs2818113  | 68421587 | rs9342657  | 0.284 |
| 6 | 68398350 | rs2818113  | 68428695 | rs2816902  | 0.679 |
| 6 | 68398350 | rs2818113  | 68454951 | rs2493374  | 0.456 |
| 6 | 68398350 | rs2818113  | 68562671 | rs9454286  | 0.342 |
| 6 | 68398350 | rs2818113  | 68563436 | rs12203654 | 0.407 |
| 6 | 68414245 | rs2179964  | 68421587 | rs9342657  | 0.298 |
| 6 | 68414245 | rs2179964  | 68428695 | rs2816902  | 0.671 |

|   |          |            |          |            |       |
|---|----------|------------|----------|------------|-------|
| 6 | 68414245 | rs2179964  | 68454951 | rs2493374  | 0.472 |
| 6 | 68414245 | rs2179964  | 68562671 | rs9454286  | 0.361 |
| 6 | 68414245 | rs2179964  | 68563436 | rs12203654 | 0.410 |
| 6 | 68414245 | rs2179964  | 68565666 | rs6913371  | 0.410 |
| 6 | 68421587 | rs9342657  | 68428695 | rs2816902  | 0.220 |
| 6 | 68421587 | rs9342657  | 68444789 | rs17546195 | 0.706 |
| 6 | 68421587 | rs9342657  | 68563436 | rs12203654 | 0.226 |
| 6 | 68421587 | rs9342657  | 68565666 | rs6913371  | 0.226 |
| 6 | 68428695 | rs2816902  | 68428791 | rs2818105  | 0.308 |
| 6 | 68428695 | rs2816902  | 68454951 | rs2493374  | 0.649 |
| 6 | 68428695 | rs2816902  | 68562671 | rs9454286  | 0.306 |
| 6 | 68428695 | rs2816902  | 68563436 | rs12203654 | 0.557 |
| 6 | 68428695 | rs2816902  | 68565666 | rs6913371  | 0.557 |
| 6 | 68428695 | rs2816902  | 68583232 | rs1913477  | 0.496 |
| 6 | 68428695 | rs2816902  | 68583437 | rs1913478  | 0.492 |
| 6 | 68428791 | rs2818105  | 68459204 | rs9454233  | 0.363 |
| 6 | 68444789 | rs17546195 | 68562671 | rs9454286  | 0.268 |
| 6 | 68454951 | rs2493374  | 68459204 | rs9454233  | 0.263 |
| 6 | 68454951 | rs2493374  | 68562671 | rs9454286  | 0.502 |
| 6 | 68454951 | rs2493374  | 68563436 | rs12203654 | 0.770 |
| 6 | 68454951 | rs2493374  | 68565666 | rs6913371  | 0.770 |
| 6 | 68454951 | rs2493374  | 68583232 | rs1913477  | 0.707 |
| 6 | 68454951 | rs2493374  | 68583437 | rs1913478  | 0.704 |
| 6 | 68459204 | rs9454233  | 68563436 | rs12203654 | 0.228 |
| 6 | 68459204 | rs9454233  | 68565666 | rs6913371  | 0.228 |
| 6 | 68459204 | rs9454233  | 68583232 | rs1913477  | 0.231 |
| 6 | 68459204 | rs9454233  | 68583437 | rs1913478  | 0.226 |
| 6 | 68562671 | rs9454286  | 68563436 | rs12203654 | 0.698 |
| 6 | 68562671 | rs9454286  | 68565666 | rs6913371  | 0.698 |
| 6 | 68562671 | rs9454286  | 68583232 | rs1913477  | 0.738 |
| 6 | 68562671 | rs9454286  | 68583437 | rs1913478  | 0.735 |
| 6 | 68563436 | rs12203654 | 68565666 | rs6913371  | 1.000 |
| 6 | 68563436 | rs12203654 | 68583232 | rs1913477  | 0.902 |
| 6 | 68563436 | rs12203654 | 68583437 | rs1913478  | 0.901 |
| 6 | 68565666 | rs6913371  | 68583232 | rs1913477  | 0.902 |
| 6 | 68565666 | rs6913371  | 68583437 | rs1913478  | 0.901 |
| 6 | 68583232 | rs1913477  | 68583437 | rs1913478  | 1.000 |
| 6 | 69233497 | rs1388056  | 69347352 | rs10455670 | 0.228 |
| 6 | 69347352 | rs10455670 | 69349961 | rs13218370 | 0.230 |
| 6 | 70594155 | rs2487399  | 70605345 | rs2487411  | 0.595 |
| 6 | 70594155 | rs2487399  | 70605431 | rs2487412  | 0.449 |
| 6 | 70605345 | rs2487411  | 70605431 | rs2487412  | 0.831 |
| 6 | 70909214 | rs9342783  | 70943464 | rs3806051  | 0.398 |
| 6 | 70943464 | rs3806051  | 71025381 | rs9354910  | 0.297 |

|   |          |            |          |            |       |
|---|----------|------------|----------|------------|-------|
| 6 | 72298055 | rs12204236 | 72304069 | rs12525003 | 0.989 |
| 6 | 74645033 | rs10498896 | 74647350 | rs41475845 | 0.976 |
| 6 | 74645033 | rs10498896 | 74663429 | rs10805983 | 0.928 |
| 6 | 74645033 | rs10498896 | 74665814 | rs12194928 | 0.929 |
| 6 | 74645033 | rs10498896 | 74667157 | rs1898483  | 0.929 |
| 6 | 74645033 | rs10498896 | 74731052 | rs12194422 | 0.575 |
| 6 | 74647350 | rs41475845 | 74663429 | rs10805983 | 0.952 |
| 6 | 74647350 | rs41475845 | 74665814 | rs12194928 | 0.953 |
| 6 | 74647350 | rs41475845 | 74667157 | rs1898483  | 0.953 |
| 6 | 74647350 | rs41475845 | 74731052 | rs12194422 | 0.578 |
| 6 | 74663429 | rs10805983 | 74665814 | rs12194928 | 1.000 |
| 6 | 74663429 | rs10805983 | 74667157 | rs1898483  | 1.000 |
| 6 | 74663429 | rs10805983 | 74731052 | rs12194422 | 0.605 |
| 6 | 74665814 | rs12194928 | 74667157 | rs1898483  | 1.000 |
| 6 | 74665814 | rs12194928 | 74731052 | rs12194422 | 0.609 |
| 6 | 74667157 | rs1898483  | 74731052 | rs12194422 | 0.609 |
| 6 | 78283839 | rs1458429  | 78373630 | rs1458424  | 0.245 |
| 6 | 78459796 | rs3846758  | 78642548 | rs7764370  | 0.681 |
| 6 | 80203374 | rs9343912  | 80380553 | rs2812683  | 0.258 |
| 6 | 80203374 | rs9343912  | 80382049 | rs2655697  | 0.261 |
| 6 | 80380553 | rs2812683  | 80382049 | rs2655697  | 0.981 |
| 6 | 80902708 | rs2322633  | 81039931 | rs660888   | 0.375 |
| 6 | 81994601 | rs7744820  | 82004634 | rs9361775  | 0.824 |
| 6 | 82304961 | rs16893194 | 82325403 | rs1935003  | 0.607 |
| 6 | 84343196 | rs11756746 | 84356081 | rs3757007  | 0.818 |
| 6 | 84343196 | rs11756746 | 84356900 | rs13212099 | 0.818 |
| 6 | 84356081 | rs3757007  | 84356900 | rs13212099 | 1.000 |
| 6 | 85547923 | rs215936   | 85573317 | rs215921   | 1.000 |
| 6 | 85821656 | rs1923587  | 85875339 | rs1325975  | 0.481 |
| 6 | 86451122 | rs2484355  | 86503587 | rs6454487  | 0.496 |
| 6 | 86451122 | rs2484355  | 86576474 | rs9450333  | 0.225 |
| 6 | 86451122 | rs2484355  | 86761974 | rs6933377  | 0.623 |
| 6 | 86503587 | rs6454487  | 86576474 | rs9450333  | 0.608 |
| 6 | 86503587 | rs6454487  | 86761974 | rs6933377  | 0.696 |
| 6 | 86576474 | rs9450333  | 86761974 | rs6933377  | 0.408 |
| 6 | 86955183 | rs6940217  | 86970480 | rs7760257  | 0.972 |
| 6 | 89805824 | rs205217   | 89818726 | rs1980986  | 0.304 |
| 6 | 92589899 | rs2501650  | 92617314 | rs2454268  | 0.669 |
| 6 | 94544526 | rs9354041  | 94544579 | rs9354042  | 1.000 |
| 6 | 94544526 | rs9354041  | 94544635 | rs9351380  | 0.984 |
| 6 | 94544526 | rs9354041  | 94593345 | rs6941459  | 0.215 |
| 6 | 94544579 | rs9354042  | 94544635 | rs9351380  | 0.984 |
| 6 | 94544579 | rs9354042  | 94593345 | rs6941459  | 0.215 |
| 6 | 94544635 | rs9351380  | 94593345 | rs6941459  | 0.209 |



|   |           |            |           |            |       |
|---|-----------|------------|-----------|------------|-------|
| 6 | 94593345  | rs6941459  | 94676185  | rs1937357  | 0.372 |
| 6 | 94593345  | rs6941459  | 94690716  | rs1219033  | 0.376 |
| 6 | 94593345  | rs6941459  | 94741047  | rs4463230  | 0.396 |
| 6 | 94676185  | rs1937357  | 94690716  | rs1219033  | 0.912 |
| 6 | 94676185  | rs1937357  | 94741047  | rs4463230  | 0.725 |
| 6 | 94690716  | rs1219033  | 94741047  | rs4463230  | 0.706 |
| 6 | 95037294  | rs220970   | 95050803  | rs397178   | 0.535 |
| 6 | 96144620  | rs9400893  | 96171771  | rs9489578  | 1.000 |
| 6 | 98423600  | rs9387768  | 98666847  | rs6927923  | 0.322 |
| 6 | 102439699 | rs6905533  | 102526006 | rs946860   | 0.401 |
| 6 | 102570833 | rs13195038 | 102577470 | rs13191478 | 0.990 |
| 6 | 104118930 | rs9391057  | 104277456 | rs4518532  | 0.299 |
| 6 | 106744268 | rs6920944  | 106808927 | rs1769981  | 0.827 |
| 6 | 107110137 | rs2297971  | 107132119 | rs4523123  | 0.532 |
| 6 | 108106634 | rs4945783  | 108106656 | rs4945784  | 1.000 |
| 6 | 108995286 | rs2253310  | 109002079 | rs2490272  | 0.953 |
| 6 | 108995286 | rs2253310  | 109115071 | rs1268165  | 0.519 |
| 6 | 109002079 | rs2490272  | 109115071 | rs1268165  | 0.556 |
| 6 | 109190725 | rs541020   | 109192329 | rs497961   | 0.775 |
| 6 | 109715354 | rs7772602  | 109717539 | rs1111866  | 0.974 |
| 6 | 109715354 | rs7772602  | 109717556 | rs1111865  | 0.974 |
| 6 | 109715354 | rs7772602  | 109717939 | rs4601178  | 0.974 |
| 6 | 109717539 | rs1111866  | 109717556 | rs1111865  | 1.000 |
| 6 | 109717539 | rs1111866  | 109717939 | rs4601178  | 1.000 |
| 6 | 109717556 | rs1111865  | 109717939 | rs4601178  | 1.000 |
| 6 | 109925149 | rs2024850  | 109959609 | rs749517   | 0.889 |
| 6 | 109925149 | rs2024850  | 110103836 | rs829816   | 0.308 |
| 6 | 109959609 | rs749517   | 110103836 | rs829816   | 0.407 |
| 6 | 113053163 | rs2346531  | 113064010 | rs17074196 | 1.000 |
| 6 | 114980551 | rs786141   | 115006803 | rs786147   | 0.279 |
| 6 | 114980551 | rs786141   | 115073292 | rs9481463  | 0.558 |
| 6 | 115006803 | rs786147   | 115073292 | rs9481463  | 0.502 |
| 6 | 115746754 | rs6940934  | 115760753 | rs6918482  | 0.842 |
| 6 | 119139019 | rs794854   | 119139756 | rs9372511  | 0.770 |
| 6 | 120062213 | rs9285434  | 120129329 | rs10872186 | 0.459 |
| 6 | 120062213 | rs9285434  | 120135566 | rs4945648  | 0.533 |
| 6 | 120129329 | rs10872186 | 120135566 | rs4945648  | 0.797 |
| 6 | 120129329 | rs10872186 | 120271168 | rs1028961  | 0.314 |
| 6 | 120135566 | rs4945648  | 120271168 | rs1028961  | 0.293 |
| 6 | 121487048 | rs1273725  | 121506710 | rs1273745  | 0.985 |
| 6 | 122646418 | rs699412   | 122779358 | rs9375134  | 0.216 |
| 6 | 122779358 | rs9375134  | 122779968 | rs3778348  | 0.859 |
| 6 | 123231090 | rs9490567  | 123231169 | rs9490568  | 0.840 |
| 6 | 125068862 | rs868549   | 125081311 | rs2875776  | 0.860 |

|   |           |            |           |            |       |
|---|-----------|------------|-----------|------------|-------|
| 6 | 125068862 | rs868549   | 125081641 | rs1415762  | 0.344 |
| 6 | 125081311 | rs2875776  | 125081641 | rs1415762  | 0.386 |
| 6 | 127467150 | rs11154383 | 127479310 | rs2800708  | 0.310 |
| 6 | 127479310 | rs2800708  | 127488303 | rs9482771  | 0.584 |
| 6 | 128854778 | rs17460940 | 128870929 | rs17461290 | 0.852 |
| 6 | 129430224 | rs7738996  | 129430959 | rs6569580  | 1.000 |
| 6 | 129430224 | rs7738996  | 129444415 | rs4327720  | 1.000 |
| 6 | 129430959 | rs6569580  | 129444415 | rs4327720  | 1.000 |
| 6 | 133915179 | rs9285474  | 133983767 | rs7452066  | 0.275 |
| 6 | 133983767 | rs7452066  | 134003067 | rs6907934  | 0.268 |
| 6 | 137291664 | rs6570112  | 137298020 | rs7745532  | 0.454 |
| 6 | 137888129 | rs9484058  | 137906100 | rs203694   | 0.910 |
| 6 | 140276853 | rs624260   | 140279510 | rs591822   | 0.988 |
| 6 | 141128904 | rs988434   | 141172474 | rs686347   | 0.611 |
| 6 | 141128904 | rs988434   | 141217062 | rs677319   | 0.439 |
| 6 | 141172474 | rs686347   | 141217062 | rs677319   | 0.478 |
| 6 | 143479138 | rs200153   | 143522436 | rs6908441  | 0.248 |
| 6 | 143927818 | rs9376756  | 143954988 | rs9321927  | 0.551 |
| 6 | 144903639 | rs10499231 | 144970410 | rs9403569  | 0.210 |
| 6 | 144960512 | rs1918744  | 144970410 | rs9403569  | 0.771 |
| 6 | 145326409 | rs6917204  | 145331021 | rs4896765  | 1.000 |
| 6 | 145594845 | rs7757259  | 145599134 | rs1546866  | 0.831 |
| 6 | 145648801 | rs551096   | 145649688 | rs9373448  | 0.535 |
| 6 | 148417762 | rs1881825  | 148451024 | rs7764264  | 0.346 |
| 6 | 151759227 | rs7746473  | 151785755 | rs3800270  | 0.744 |
| 6 | 153237927 | rs583501   | 153259954 | rs656610   | 0.906 |
| 6 | 153237927 | rs583501   | 153261967 | rs633399   | 0.722 |
| 6 | 153259954 | rs656610   | 153261967 | rs633399   | 0.789 |
| 6 | 155297981 | rs9397210  | 155300670 | rs9371355  | 0.794 |
| 6 | 159541322 | rs294922   | 159555931 | rs400477   | 0.284 |
| 6 | 159541322 | rs294922   | 159561726 | rs427072   | 0.884 |
| 6 | 159541322 | rs294922   | 159575663 | rs2932987  | 0.326 |
| 6 | 159555931 | rs400477   | 159561726 | rs427072   | 0.291 |
| 6 | 159555931 | rs400477   | 159575663 | rs2932987  | 0.961 |
| 6 | 159561726 | rs427072   | 159575663 | rs2932987  | 0.333 |
| 6 | 161991625 | rs2281403  | 161993412 | rs7763253  | 0.992 |
| 6 | 162112846 | rs3016563  | 162141710 | rs3016551  | 0.693 |
| 6 | 162656326 | rs6455807  | 162656490 | rs7740928  | 0.595 |
| 6 | 162656326 | rs6455807  | 162666349 | rs6930880  | 0.611 |
| 6 | 162656490 | rs7740928  | 162666349 | rs6930880  | 0.313 |
| 6 | 162656490 | rs7740928  | 162728999 | rs10945825 | 0.229 |
| 6 | 167365129 | rs2282859  | 167371516 | rs16899825 | 0.885 |
| 6 | 167434073 | rs4710183  | 167436448 | rs975822   | 0.325 |
| 6 | 167434073 | rs4710183  | 167443385 | rs6907666  | 0.508 |

|   |           |            |           |            |       |
|---|-----------|------------|-----------|------------|-------|
| 6 | 167434073 | rs4710183  | 167444229 | rs2021033  | 0.427 |
| 6 | 167434073 | rs4710183  | 167448022 | rs6456158  | 0.389 |
| 6 | 167436448 | rs975822   | 167443385 | rs6907666  | 0.468 |
| 6 | 167436448 | rs975822   | 167444229 | rs2021033  | 0.574 |
| 6 | 167436448 | rs975822   | 167448022 | rs6456158  | 0.583 |
| 6 | 167443385 | rs6907666  | 167444229 | rs2021033  | 0.525 |
| 6 | 167443385 | rs6907666  | 167448022 | rs6456158  | 0.368 |
| 6 | 167444229 | rs2021033  | 167448022 | rs6456158  | 0.595 |
| 6 | 169306641 | rs6908401  | 169326313 | rs12661910 | 0.645 |
| 6 | 169554513 | rs2075978  | 169559926 | rs4469299  | 0.851 |
| 6 | 169554513 | rs2075978  | 169677751 | rs16888111 | 0.207 |
| 6 | 170525166 | rs1022615  | 170554104 | rs9460139  | 0.671 |
| 7 | 828052    | rs7785538  | 829331    | rs11766365 | 0.827 |
| 7 | 828052    | rs7785538  | 832995    | rs6973278  | 0.208 |
| 7 | 828052    | rs7785538  | 868920    | rs7785252  | 0.413 |
| 7 | 829331    | rs11766365 | 832995    | rs6973278  | 0.201 |
| 7 | 829331    | rs11766365 | 868920    | rs7785252  | 0.393 |
| 7 | 832995    | rs6973278  | 868920    | rs7785252  | 0.438 |
| 7 | 2792448   | rs2527684  | 2826743   | rs2644295  | 0.813 |
| 7 | 3121336   | rs6958161  | 3121827   | rs10951052 | 0.266 |
| 7 | 3121336   | rs6958161  | 3122339   | rs4722438  | 0.394 |
| 7 | 3121827   | rs10951052 | 3122339   | rs4722438  | 0.610 |
| 7 | 3279396   | rs2049477  | 3412717   | rs41363846 | 0.225 |
| 7 | 3412717   | rs41363846 | 3423822   | rs17741019 | 0.340 |
| 7 | 3841536   | rs13236719 | 3882090   | rs6462411  | 0.234 |
| 7 | 7164598   | rs12536325 | 7245535   | rs10279432 | 0.422 |
| 7 | 7358756   | rs1294620  | 7359239   | rs1294622  | 0.699 |
| 7 | 7358756   | rs1294620  | 7370503   | rs6974119  | 0.699 |
| 7 | 7359239   | rs1294622  | 7370503   | rs6974119  | 1.000 |
| 7 | 8362245   | rs2110521  | 8414480   | rs6463805  | 0.437 |
| 7 | 9061487   | rs13240893 | 9086521   | rs12702864 | 0.625 |
| 7 | 9179513   | rs449245   | 9180202   | rs369785   | 0.983 |
| 7 | 9200867   | rs17792244 | 9242493   | rs2350432  | 0.247 |
| 7 | 9512802   | rs2713342  | 9526119   | rs4548084  | 0.529 |
| 7 | 9512802   | rs2713342  | 9535960   | rs10245938 | 0.875 |
| 7 | 9512802   | rs2713342  | 9538623   | rs17161716 | 0.253 |
| 7 | 9512802   | rs2713342  | 9612145   | rs1505322  | 0.243 |
| 7 | 9512802   | rs2713342  | 9612572   | rs1354607  | 0.243 |
| 7 | 9526119   | rs4548084  | 9534049   | rs1505310  | 0.203 |
| 7 | 9526119   | rs4548084  | 9535960   | rs10245938 | 0.526 |
| 7 | 9535960   | rs10245938 | 9538623   | rs17161716 | 0.204 |
| 7 | 9535960   | rs10245938 | 9612145   | rs1505322  | 0.306 |
| 7 | 9535960   | rs10245938 | 9612572   | rs1354607  | 0.306 |
| 7 | 9612145   | rs1505322  | 9612572   | rs1354607  | 1.000 |

|   |          |            |          |            |       |
|---|----------|------------|----------|------------|-------|
| 7 | 10087591 | rs12702976 | 10090856 | rs12702978 | 0.427 |
| 7 | 10339966 | rs4720876  | 10344828 | rs6463990  | 0.802 |
| 7 | 11364881 | rs7794021  | 11431856 | rs1468244  | 0.647 |
| 7 | 12085773 | rs12536861 | 12121572 | rs10950385 | 0.395 |
| 7 | 12409567 | rs17166013 | 12473257 | rs17166041 | 0.749 |
| 7 | 14423427 | rs34628921 | 14443632 | rs196751   | 0.253 |
| 7 | 16520773 | rs11772541 | 16558354 | rs10228487 | 0.211 |
| 7 | 17792353 | rs2723497  | 17821057 | rs2723501  | 0.825 |
| 7 | 17792353 | rs2723497  | 17950332 | rs4544985  | 0.495 |
| 7 | 17821057 | rs2723501  | 17950332 | rs4544985  | 0.398 |
| 7 | 19353457 | rs6967671  | 19366356 | rs9639329  | 0.548 |
| 7 | 23729805 | rs10950957 | 23859818 | rs6957981  | 0.385 |
| 7 | 23859818 | rs6957981  | 23882268 | rs7792262  | 0.240 |
| 7 | 23922398 | rs17148510 | 23924393 | rs7780155  | 0.922 |
| 7 | 24147580 | rs198712   | 24179881 | rs156318   | 0.456 |
| 7 | 24147580 | rs198712   | 24184522 | rs156308   | 0.448 |
| 7 | 24179881 | rs156318   | 24184522 | rs156308   | 0.711 |
| 7 | 24184522 | rs156308   | 24224231 | rs16217    | 0.377 |
| 7 | 25966662 | rs6946189  | 25986081 | rs4722557  | 0.987 |
| 7 | 28759930 | rs35010731 | 28784337 | rs35910392 | 0.750 |
| 7 | 28766752 | rs4722842  | 28805091 | rs4722855  | 0.566 |
| 7 | 28766752 | rs4722842  | 28845849 | rs4722858  | 0.490 |
| 7 | 28805091 | rs4722855  | 28811671 | rs6977628  | 0.320 |
| 7 | 28805091 | rs4722855  | 28845849 | rs4722858  | 0.750 |
| 7 | 28805091 | rs4722855  | 28857274 | rs768229   | 0.265 |
| 7 | 28811671 | rs6977628  | 28845849 | rs4722858  | 0.323 |
| 7 | 28811671 | rs6977628  | 28857274 | rs768229   | 0.514 |
| 7 | 28845849 | rs4722858  | 28857274 | rs768229   | 0.218 |
| 7 | 31515561 | rs7803617  | 31515779 | rs10228992 | 1.000 |
| 7 | 31610170 | rs38327    | 31639395 | rs38379    | 0.345 |
| 7 | 31610170 | rs38327    | 31658222 | rs3735424  | 0.439 |
| 7 | 32235840 | rs7803347  | 32243806 | rs12538506 | 0.830 |
| 7 | 37313843 | rs9655380  | 37314747 | rs2701003  | 0.498 |
| 7 | 38768570 | rs3801140  | 38925791 | rs10255290 | 0.209 |
| 7 | 39619158 | rs1113117  | 39708450 | rs2158549  | 0.668 |
| 7 | 39707012 | rs7778955  | 39708450 | rs2158549  | 0.247 |
| 7 | 41697456 | rs2237436  | 41697578 | rs2237435  | 0.707 |
| 7 | 41905263 | rs1476666  | 41940034 | rs6952496  | 0.281 |
| 7 | 42414251 | rs1560617  | 42417749 | rs12333485 | 0.953 |
| 7 | 44988782 | rs1557934  | 45021739 | rs6969223  | 0.899 |
| 7 | 44988782 | rs1557934  | 45040324 | rs1294966  | 0.863 |
| 7 | 44988782 | rs1557934  | 45071642 | rs3735486  | 0.309 |
| 7 | 45021739 | rs6969223  | 45040324 | rs1294966  | 0.969 |
| 7 | 45021739 | rs6969223  | 45071642 | rs3735486  | 0.375 |

|   |          |            |          |            |       |
|---|----------|------------|----------|------------|-------|
| 7 | 45040324 | rs1294966  | 45071642 | rs3735486  | 0.337 |
| 7 | 45071642 | rs3735486  | 45113181 | rs3757572  | 0.202 |
| 7 | 47009631 | rs10245153 | 47043330 | rs12533855 | 0.402 |
| 7 | 48059930 | rs10499672 | 48060754 | rs7803787  | 1.000 |
| 7 | 51776473 | rs17580955 | 51780004 | rs10488099 | 0.682 |
| 7 | 51999593 | rs387130   | 52003163 | rs417184   | 1.000 |
| 7 | 54931888 | rs6593195  | 54933847 | rs17583407 | 0.491 |
| 7 | 55345979 | rs2030807  | 55358496 | rs2177807  | 0.969 |
| 7 | 55345979 | rs2030807  | 55373694 | rs6593233  | 0.969 |
| 7 | 55358496 | rs2177807  | 55373694 | rs6593233  | 1.000 |
| 7 | 63308111 | rs10949880 | 63328963 | rs2164110  | 0.367 |
| 7 | 63328963 | rs2164110  | 63389515 | rs10949887 | 0.365 |
| 7 | 63328963 | rs2164110  | 63393541 | rs17768351 | 0.221 |
| 7 | 63328963 | rs2164110  | 63473967 | rs10949909 | 0.270 |
| 7 | 63328963 | rs2164110  | 63480341 | rs12530839 | 0.276 |
| 7 | 63328963 | rs2164110  | 63606271 | rs34764583 | 0.280 |
| 7 | 63382364 | rs687547   | 63389515 | rs10949887 | 0.374 |
| 7 | 63382364 | rs687547   | 63393541 | rs17768351 | 0.255 |
| 7 | 63389515 | rs10949887 | 63393541 | rs17768351 | 0.609 |
| 7 | 63389515 | rs10949887 | 63473967 | rs10949909 | 0.414 |
| 7 | 63389515 | rs10949887 | 63480341 | rs12530839 | 0.421 |
| 7 | 63389515 | rs10949887 | 63606271 | rs34764583 | 0.395 |
| 7 | 63393541 | rs17768351 | 63473967 | rs10949909 | 0.672 |
| 7 | 63393541 | rs17768351 | 63480341 | rs12530839 | 0.681 |
| 7 | 63393541 | rs17768351 | 63606271 | rs34764583 | 0.444 |
| 7 | 63473967 | rs10949909 | 63480341 | rs12530839 | 0.985 |
| 7 | 63473967 | rs10949909 | 63606271 | rs34764583 | 0.640 |
| 7 | 63480341 | rs12530839 | 63606271 | rs34764583 | 0.651 |
| 7 | 65053082 | rs1917563  | 65217157 | rs6946143  | 0.546 |
| 7 | 65053082 | rs1917563  | 65271756 | rs10950029 | 0.313 |
| 7 | 65217157 | rs6946143  | 65271756 | rs10950029 | 0.570 |
| 7 | 67324499 | rs12698679 | 67395195 | rs6971845  | 0.342 |
| 7 | 67324499 | rs12698679 | 67406049 | rs12698688 | 0.349 |
| 7 | 67395195 | rs6971845  | 67406049 | rs12698688 | 0.915 |
| 7 | 67807177 | rs11768294 | 67842575 | rs880330   | 0.791 |
| 7 | 70093809 | rs4719045  | 70129334 | rs6969013  | 0.495 |
| 7 | 75532015 | rs11972240 | 75534356 | rs10476    | 1.000 |
| 7 | 75532015 | rs11972240 | 75613946 | rs7794454  | 0.916 |
| 7 | 75532015 | rs11972240 | 75648409 | rs9800948  | 0.967 |
| 7 | 75534356 | rs10476    | 75613946 | rs7794454  | 0.915 |
| 7 | 75534356 | rs10476    | 75648409 | rs9800948  | 0.966 |
| 7 | 75613946 | rs7794454  | 75648409 | rs9800948  | 0.913 |
| 7 | 76689259 | rs7810066  | 76708934 | rs17230010 | 0.466 |
| 7 | 77138046 | rs17156320 | 77146231 | rs17807185 | 0.521 |

|   |           |            |           |            |       |
|---|-----------|------------|-----------|------------|-------|
| 7 | 77138046  | rs17156320 | 77152754  | rs12113119 | 0.510 |
| 7 | 77146231  | rs17807185 | 77152754  | rs12113119 | 0.977 |
| 7 | 78722211  | rs7782585  | 78873419  | rs9969364  | 0.402 |
| 7 | 79981291  | rs17260734 | 79981364  | rs17260769 | 1.000 |
| 7 | 82226650  | rs13438494 | 82233177  | rs34608268 | 0.575 |
| 7 | 82226650  | rs13438494 | 82240309  | rs10954689 | 0.344 |
| 7 | 82226650  | rs13438494 | 82322986  | rs7795945  | 0.220 |
| 7 | 82226650  | rs13438494 | 82341378  | rs1986742  | 0.740 |
| 7 | 82233177  | rs34608268 | 82240309  | rs10954689 | 0.699 |
| 7 | 82233177  | rs34608268 | 82322986  | rs7795945  | 0.387 |
| 7 | 82233177  | rs34608268 | 82341378  | rs1986742  | 0.500 |
| 7 | 82240309  | rs10954689 | 82322986  | rs7795945  | 0.515 |
| 7 | 82240309  | rs10954689 | 82341378  | rs1986742  | 0.306 |
| 7 | 82322986  | rs7795945  | 82341378  | rs1986742  | 0.249 |
| 7 | 83502065  | rs17158535 | 83543343  | rs12669854 | 0.336 |
| 7 | 83802374  | rs520536   | 83939710  | rs1236923  | 0.208 |
| 7 | 83939710  | rs1236923  | 84197220  | rs4728560  | 0.247 |
| 7 | 83939710  | rs1236923  | 84281713  | rs11764839 | 0.200 |
| 7 | 83939710  | rs1236923  | 84291220  | rs12672643 | 0.201 |
| 7 | 83939710  | rs1236923  | 84291612  | rs4395839  | 0.201 |
| 7 | 84197220  | rs4728560  | 84281713  | rs11764839 | 0.800 |
| 7 | 84197220  | rs4728560  | 84291220  | rs12672643 | 0.808 |
| 7 | 84197220  | rs4728560  | 84291612  | rs4395839  | 0.808 |
| 7 | 84197220  | rs4728560  | 84341515  | rs7799648  | 0.481 |
| 7 | 84281713  | rs11764839 | 84291220  | rs12672643 | 0.989 |
| 7 | 84281713  | rs11764839 | 84291612  | rs4395839  | 0.989 |
| 7 | 84281713  | rs11764839 | 84341515  | rs7799648  | 0.631 |
| 7 | 84291220  | rs12672643 | 84291612  | rs4395839  | 1.000 |
| 7 | 84291220  | rs12672643 | 84341515  | rs7799648  | 0.624 |
| 7 | 84291612  | rs4395839  | 84341515  | rs7799648  | 0.624 |
| 7 | 85285979  | rs1911993  | 85368185  | rs10280835 | 0.802 |
| 7 | 85436441  | rs17313775 | 85509840  | rs17316106 | 0.906 |
| 7 | 86225947  | rs2888551  | 86243244  | rs17160978 | 0.418 |
| 7 | 86298766  | rs17161024 | 86305187  | rs10952891 | 0.948 |
| 7 | 91278295  | rs1209001  | 91455027  | rs10488509 | 0.677 |
| 7 | 91347487  | rs2269811  | 91379438  | rs403      | 0.557 |
| 7 | 91347487  | rs2269811  | 91694752  | rs11769780 | 0.555 |
| 7 | 91379438  | rs403      | 91694752  | rs11769780 | 0.281 |
| 7 | 95713592  | rs12704838 | 95854947  | rs12536064 | 0.360 |
| 7 | 103189479 | rs10487172 | 103271612 | rs13233763 | 0.347 |
| 7 | 103189479 | rs10487172 | 103305285 | rs2283034  | 0.321 |
| 7 | 103271612 | rs13233763 | 103305285 | rs2283034  | 0.954 |
| 7 | 105609420 | rs6954754  | 105620778 | rs6951857  | 0.950 |
| 7 | 107148672 | rs4730253  | 107183738 | rs4730259  | 0.789 |

|   |           |            |           |            |       |
|---|-----------|------------|-----------|------------|-------|
| 7 | 108317456 | rs3922355  | 108319365 | rs9690782  | 0.777 |
| 7 | 110321238 | rs258984   | 110447291 | rs7809411  | 0.266 |
| 7 | 110520953 | rs2107147  | 110833204 | rs258922   | 0.247 |
| 7 | 112140548 | rs10216230 | 112140676 | rs10215501 | 1.000 |
| 7 | 112140548 | rs10216230 | 112187296 | rs10271752 | 0.618 |
| 7 | 112140548 | rs10216230 | 112230777 | rs2396570  | 0.344 |
| 7 | 112140548 | rs10216230 | 112231329 | rs3957315  | 0.218 |
| 7 | 112140548 | rs10216230 | 112252077 | rs821785   | 0.598 |
| 7 | 112140548 | rs10216230 | 112263992 | rs821787   | 0.598 |
| 7 | 112140548 | rs10216230 | 112287160 | rs6948575  | 0.541 |
| 7 | 112140548 | rs10216230 | 112323976 | rs685259   | 0.582 |
| 7 | 112140676 | rs10215501 | 112187296 | rs10271752 | 0.618 |
| 7 | 112140676 | rs10215501 | 112230777 | rs2396570  | 0.344 |
| 7 | 112140676 | rs10215501 | 112231329 | rs3957315  | 0.218 |
| 7 | 112140676 | rs10215501 | 112252077 | rs821785   | 0.598 |
| 7 | 112140676 | rs10215501 | 112263992 | rs821787   | 0.598 |
| 7 | 112140676 | rs10215501 | 112287160 | rs6948575  | 0.541 |
| 7 | 112140676 | rs10215501 | 112323976 | rs685259   | 0.582 |
| 7 | 112187296 | rs10271752 | 112230777 | rs2396570  | 0.253 |
| 7 | 112187296 | rs10271752 | 112252077 | rs821785   | 0.789 |
| 7 | 112187296 | rs10271752 | 112263992 | rs821787   | 0.789 |
| 7 | 112187296 | rs10271752 | 112287160 | rs6948575  | 0.896 |
| 7 | 112187296 | rs10271752 | 112323976 | rs685259   | 0.768 |
| 7 | 112230777 | rs2396570  | 112231329 | rs3957315  | 0.705 |
| 7 | 112230777 | rs2396570  | 112287160 | rs6948575  | 0.242 |
| 7 | 112252077 | rs821785   | 112263992 | rs821787   | 1.000 |
| 7 | 112252077 | rs821785   | 112287160 | rs6948575  | 0.848 |
| 7 | 112252077 | rs821785   | 112323976 | rs685259   | 0.977 |
| 7 | 112263992 | rs821787   | 112287160 | rs6948575  | 0.848 |
| 7 | 112263992 | rs821787   | 112323976 | rs685259   | 0.977 |
| 7 | 112287160 | rs6948575  | 112323976 | rs685259   | 0.843 |
| 7 | 119754163 | rs7805413  | 120012531 | rs10257987 | 0.225 |
| 7 | 119754163 | rs7805413  | 120018452 | rs9886190  | 0.226 |
| 7 | 119754163 | rs7805413  | 120022020 | rs10277086 | 0.209 |
| 7 | 120012531 | rs10257987 | 120018452 | rs9886190  | 1.000 |
| 7 | 120012531 | rs10257987 | 120018941 | rs2049643  | 0.911 |
| 7 | 120012531 | rs10257987 | 120022020 | rs10277086 | 0.893 |
| 7 | 120018452 | rs9886190  | 120018941 | rs2049643  | 0.911 |
| 7 | 120018452 | rs9886190  | 120022020 | rs10277086 | 0.893 |
| 7 | 120018941 | rs2049643  | 120022020 | rs10277086 | 0.979 |
| 7 | 120774586 | rs2707461  | 120790146 | rs2536163  | 0.922 |
| 7 | 121768078 | rs12706408 | 122127346 | rs10268368 | 0.203 |
| 7 | 124779451 | rs10500106 | 124782413 | rs12706650 | 0.811 |
| 7 | 124817406 | rs10808221 | 124817455 | rs11766248 | 1.000 |

|   |           |            |           |            |       |
|---|-----------|------------|-----------|------------|-------|
| 7 | 127133172 | rs698408   | 127156383 | rs12667197 | 0.880 |
| 7 | 127133172 | rs698408   | 127426110 | rs2241291  | 0.757 |
| 7 | 127156383 | rs12667197 | 127426110 | rs2241291  | 0.858 |
| 7 | 130971372 | rs10272488 | 130971538 | rs10257021 | 0.972 |
| 7 | 131104065 | rs1106683  | 131104205 | rs1106684  | 0.883 |
| 7 | 131104065 | rs1106683  | 131104596 | rs4535659  | 0.965 |
| 7 | 131104065 | rs1106683  | 131108546 | rs10954327 | 0.783 |
| 7 | 131104205 | rs1106684  | 131104596 | rs4535659  | 0.914 |
| 7 | 131104205 | rs1106684  | 131108546 | rs10954327 | 0.893 |
| 7 | 131104596 | rs4535659  | 131108546 | rs10954327 | 0.818 |
| 7 | 131165524 | rs9656405  | 131167742 | rs6944918  | 0.530 |
| 7 | 131165524 | rs9656405  | 131168465 | rs1004592  | 0.524 |
| 7 | 131165524 | rs9656405  | 131168939 | rs11975237 | 0.530 |
| 7 | 131167742 | rs6944918  | 131168465 | rs1004592  | 0.952 |
| 7 | 131167742 | rs6944918  | 131168939 | rs11975237 | 1.000 |
| 7 | 131168465 | rs1004592  | 131168939 | rs11975237 | 0.952 |
| 7 | 131804990 | rs156932   | 131886201 | rs1426496  | 0.316 |
| 7 | 131842267 | rs125095   | 131854448 | rs156978   | 0.781 |
| 7 | 132137536 | rs998827   | 132140892 | rs13246875 | 0.642 |
| 7 | 132140892 | rs13246875 | 132436682 | rs10245117 | 0.216 |
| 7 | 132392028 | rs17422732 | 132436682 | rs10245117 | 0.257 |
| 7 | 134151672 | rs6956447  | 134219717 | rs4732066  | 0.437 |
| 7 | 135133308 | rs11762316 | 135133591 | rs10233321 | 0.403 |
| 7 | 136030769 | rs10244209 | 136134010 | rs7792231  | 0.407 |
| 7 | 136543860 | rs1725021  | 136552209 | rs832974   | 0.963 |
| 7 | 139804299 | rs6464779  | 139814627 | rs10216203 | 1.000 |
| 7 | 139909578 | rs1639945  | 140422870 | rs553046   | 0.231 |
| 7 | 139909578 | rs1639945  | 140423083 | rs491554   | 0.233 |
| 7 | 140260681 | rs11762469 | 140422870 | rs553046   | 0.378 |
| 7 | 140260681 | rs11762469 | 140423083 | rs491554   | 0.380 |
| 7 | 140422870 | rs553046   | 140423083 | rs491554   | 0.990 |
| 7 | 143910061 | rs17170146 | 143918753 | rs10487634 | 0.525 |
| 7 | 143910061 | rs17170146 | 143931363 | rs4329196  | 0.612 |
| 7 | 143918753 | rs10487634 | 143931363 | rs4329196  | 0.692 |
| 7 | 147588565 | rs1881723  | 147597745 | rs10952742 | 0.258 |
| 7 | 147631587 | rs1104853  | 147631751 | rs1104852  | 0.921 |
| 7 | 148089577 | rs11773084 | 148101252 | rs2373414  | 0.991 |
| 7 | 148089577 | rs11773084 | 148111166 | rs1558419  | 0.268 |
| 7 | 148089577 | rs11773084 | 148136997 | rs740949   | 0.290 |
| 7 | 148089577 | rs11773084 | 148139130 | rs2072408  | 0.241 |
| 7 | 148089577 | rs11773084 | 148149944 | rs6464926  | 0.790 |
| 7 | 148101252 | rs2373414  | 148111166 | rs1558419  | 0.256 |
| 7 | 148101252 | rs2373414  | 148136997 | rs740949   | 0.288 |
| 7 | 148101252 | rs2373414  | 148139130 | rs2072408  | 0.229 |



|   |           |            |           |            |       |
|---|-----------|------------|-----------|------------|-------|
| 7 | 148101252 | rs2373414  | 148149944 | rs6464926  | 0.798 |
| 7 | 148111166 | rs1558419  | 148136997 | rs740949   | 0.668 |
| 7 | 148111166 | rs1558419  | 148139130 | rs2072408  | 0.691 |
| 7 | 148111166 | rs1558419  | 148149944 | rs6464926  | 0.259 |
| 7 | 148136997 | rs740949   | 148139130 | rs2072408  | 0.679 |
| 7 | 148136997 | rs740949   | 148149944 | rs6464926  | 0.297 |
| 7 | 148139130 | rs2072408  | 148149944 | rs6464926  | 0.239 |
| 7 | 148545983 | rs12704084 | 148547560 | rs1202397  | 0.413 |
| 7 | 149861625 | rs10277380 | 149876189 | rs10236188 | 0.990 |
| 7 | 150916094 | rs17173202 | 150916125 | rs6464148  | 0.764 |
| 7 | 154577582 | rs1529082  | 154578004 | rs7800026  | 0.828 |
| 7 | 157768381 | rs10237246 | 157774945 | rs1597900  | 0.829 |
| 7 | 157768381 | rs10237246 | 157781757 | rs4909173  | 0.699 |
| 7 | 157768381 | rs10237246 | 157782256 | rs7800966  | 0.253 |
| 7 | 157768381 | rs10237246 | 157783490 | rs6950401  | 0.858 |
| 7 | 157774945 | rs1597900  | 157781757 | rs4909173  | 0.672 |
| 7 | 157774945 | rs1597900  | 157783490 | rs6950401  | 0.704 |
| 7 | 157781757 | rs4909173  | 157782256 | rs7800966  | 0.388 |
| 7 | 157781757 | rs4909173  | 157783490 | rs6950401  | 0.825 |
| 7 | 157782256 | rs7800966  | 157783490 | rs6950401  | 0.368 |
| 7 | 157950730 | rs1670365  | 157957951 | rs1733133  | 0.860 |
| 7 | 157950730 | rs1670365  | 157958216 | rs1632730  | 0.878 |
| 7 | 157957951 | rs1733133  | 157958216 | rs1632730  | 0.980 |
| 8 | 413694    | rs11774384 | 426230    | rs17065022 | 0.237 |
| 8 | 2095060   | rs17752483 | 2100948   | rs6981174  | 0.830 |
| 8 | 2095060   | rs17752483 | 2106025   | rs11990285 | 0.214 |
| 8 | 2100948   | rs6981174  | 2101199   | rs17685416 | 0.218 |
| 8 | 2100948   | rs6981174  | 2106025   | rs11990285 | 0.244 |
| 8 | 2101199   | rs17685416 | 2106025   | rs11990285 | 0.480 |
| 8 | 2309171   | rs17063040 | 2675472   | rs724654   | 0.203 |
| 8 | 3114063   | rs13263104 | 3115312   | rs7008857  | 0.734 |
| 8 | 3430697   | rs17323568 | 3467652   | rs1158563  | 0.314 |
| 8 | 3575030   | rs1383950  | 3575173   | rs4345580  | 0.271 |
| 8 | 5000841   | rs4495448  | 5001153   | rs7818064  | 0.767 |
| 8 | 6092262   | rs4997127  | 6123920   | rs7827867  | 0.258 |
| 8 | 6116508   | rs4466421  | 6123920   | rs7827867  | 0.691 |
| 8 | 6549500   | rs10108451 | 6557762   | rs1365042  | 0.537 |
| 8 | 6549500   | rs10108451 | 6572293   | rs2911976  | 0.410 |
| 8 | 6549500   | rs10108451 | 6573272   | rs2980684  | 0.404 |
| 8 | 6549500   | rs10108451 | 6573287   | rs2980683  | 0.397 |
| 8 | 6549500   | rs10108451 | 6587757   | rs2928576  | 0.403 |
| 8 | 6549500   | rs10108451 | 6595480   | rs2936507  | 0.262 |
| 8 | 6549500   | rs10108451 | 6597571   | rs2928579  | 0.306 |
| 8 | 6549500   | rs10108451 | 6603381   | rs2911970  | 0.262 |

|   |          |            |          |            |       |
|---|----------|------------|----------|------------|-------|
| 8 | 6557762  | rs1365042  | 6572293  | rs2911976  | 0.836 |
| 8 | 6557762  | rs1365042  | 6573272  | rs2980684  | 0.834 |
| 8 | 6557762  | rs1365042  | 6573287  | rs2980683  | 0.843 |
| 8 | 6557762  | rs1365042  | 6587757  | rs2928576  | 0.796 |
| 8 | 6557762  | rs1365042  | 6595480  | rs2936507  | 0.554 |
| 8 | 6557762  | rs1365042  | 6597571  | rs2928579  | 0.615 |
| 8 | 6557762  | rs1365042  | 6603381  | rs2911970  | 0.576 |
| 8 | 6557762  | rs1365042  | 6603545  | rs2980688  | 0.517 |
| 8 | 6572293  | rs2911976  | 6573272  | rs2980684  | 0.979 |
| 8 | 6572293  | rs2911976  | 6573287  | rs2980683  | 0.968 |
| 8 | 6572293  | rs2911976  | 6587757  | rs2928576  | 0.898 |
| 8 | 6572293  | rs2911976  | 6595480  | rs2936507  | 0.616 |
| 8 | 6572293  | rs2911976  | 6597571  | rs2928579  | 0.686 |
| 8 | 6572293  | rs2911976  | 6603381  | rs2911970  | 0.648 |
| 8 | 6572293  | rs2911976  | 6603545  | rs2980688  | 0.647 |
| 8 | 6573272  | rs2980684  | 6573287  | rs2980683  | 0.989 |
| 8 | 6573272  | rs2980684  | 6587757  | rs2928576  | 0.897 |
| 8 | 6573272  | rs2980684  | 6595480  | rs2936507  | 0.616 |
| 8 | 6573272  | rs2980684  | 6597571  | rs2928579  | 0.689 |
| 8 | 6573272  | rs2980684  | 6603381  | rs2911970  | 0.652 |
| 8 | 6573272  | rs2980684  | 6603545  | rs2980688  | 0.654 |
| 8 | 6573287  | rs2980683  | 6587757  | rs2928576  | 0.887 |
| 8 | 6573287  | rs2980683  | 6595480  | rs2936507  | 0.621 |
| 8 | 6573287  | rs2980683  | 6597571  | rs2928579  | 0.693 |
| 8 | 6573287  | rs2980683  | 6603381  | rs2911970  | 0.652 |
| 8 | 6573287  | rs2980683  | 6603545  | rs2980688  | 0.657 |
| 8 | 6587757  | rs2928576  | 6595480  | rs2936507  | 0.689 |
| 8 | 6587757  | rs2928576  | 6597571  | rs2928579  | 0.772 |
| 8 | 6587757  | rs2928576  | 6603381  | rs2911970  | 0.731 |
| 8 | 6587757  | rs2928576  | 6603545  | rs2980688  | 0.714 |
| 8 | 6595480  | rs2936507  | 6597571  | rs2928579  | 0.817 |
| 8 | 6595480  | rs2936507  | 6603381  | rs2911970  | 0.763 |
| 8 | 6595480  | rs2936507  | 6603545  | rs2980688  | 0.755 |
| 8 | 6597571  | rs2928579  | 6603381  | rs2911970  | 0.859 |
| 8 | 6597571  | rs2928579  | 6603545  | rs2980688  | 0.903 |
| 8 | 6603381  | rs2911970  | 6603545  | rs2980688  | 1.000 |
| 8 | 8808383  | rs403245   | 8808812  | rs373204   | 0.879 |
| 8 | 8912648  | rs13250919 | 8915922  | rs6989707  | 0.909 |
| 8 | 8912648  | rs13250919 | 8950115  | rs2100021  | 0.321 |
| 8 | 8915922  | rs6989707  | 8950115  | rs2100021  | 0.307 |
| 8 | 10657436 | rs17152302 | 10691571 | rs10113332 | 0.926 |
| 8 | 11330445 | rs7018402  | 11336016 | rs12114115 | 0.974 |
| 8 | 14431172 | rs1461859  | 14519569 | rs12547411 | 0.293 |
| 8 | 14517871 | rs4831619  | 14549919 | rs1397293  | 0.874 |

|   |          |            |          |            |       |
|---|----------|------------|----------|------------|-------|
| 8 | 14731549 | rs12681897 | 14763659 | rs4602887  | 0.409 |
| 8 | 15995933 | rs10096072 | 16198679 | rs4831814  | 0.208 |
| 8 | 16165538 | rs2163120  | 16198679 | rs4831814  | 0.817 |
| 8 | 16165538 | rs2163120  | 16592499 | rs1368538  | 0.248 |
| 8 | 16165538 | rs2163120  | 16649761 | rs1620255  | 0.272 |
| 8 | 16198679 | rs4831814  | 16592499 | rs1368538  | 0.359 |
| 8 | 16198679 | rs4831814  | 16649761 | rs1620255  | 0.229 |
| 8 | 16492644 | rs1094542  | 16557658 | rs17584028 | 0.256 |
| 8 | 16561402 | rs17123386 | 16562352 | rs6997598  | 0.936 |
| 8 | 16592499 | rs1368538  | 16649761 | rs1620255  | 0.226 |
| 8 | 16801933 | rs2410441  | 16803309 | rs823580   | 0.423 |
| 8 | 17551579 | rs17590021 | 17595342 | rs209972   | 0.544 |
| 8 | 17551579 | rs17590021 | 17617387 | rs2937891  | 0.369 |
| 8 | 17595342 | rs209972   | 17617387 | rs2937891  | 0.428 |
| 8 | 17657126 | rs3739408  | 17657155 | rs3739407  | 0.397 |
| 8 | 19234037 | rs7845057  | 19257352 | rs17128267 | 0.325 |
| 8 | 19234037 | rs7845057  | 19257994 | rs17128272 | 0.325 |
| 8 | 19234037 | rs7845057  | 19260902 | rs10503654 | 0.312 |
| 8 | 19257352 | rs17128267 | 19257994 | rs17128272 | 1.000 |
| 8 | 19257352 | rs17128267 | 19260902 | rs10503654 | 0.389 |
| 8 | 19257994 | rs17128272 | 19260902 | rs10503654 | 0.389 |
| 8 | 19630705 | rs17091182 | 19630860 | rs17091190 | 0.986 |
| 8 | 24424830 | rs17052096 | 24437265 | rs12546913 | 0.226 |
| 8 | 24566691 | rs10099022 | 24785810 | rs7844382  | 0.276 |
| 8 | 27645946 | rs2010776  | 27680859 | rs10091671 | 0.700 |
| 8 | 27645946 | rs2010776  | 27706347 | rs4732754  | 0.351 |
| 8 | 27656369 | rs6987111  | 27660469 | rs6989156  | 0.865 |
| 8 | 27656369 | rs6987111  | 27668810 | rs6989497  | 1.000 |
| 8 | 27656369 | rs6987111  | 27694316 | rs1460224  | 0.376 |
| 8 | 27656369 | rs6987111  | 27725167 | rs4732757  | 0.347 |
| 8 | 27656369 | rs6987111  | 27729323 | rs17057911 | 0.326 |
| 8 | 27656369 | rs6987111  | 27729539 | rs17057923 | 0.367 |
| 8 | 27660469 | rs6989156  | 27668810 | rs6989497  | 0.865 |
| 8 | 27660469 | rs6989156  | 27694316 | rs1460224  | 0.494 |
| 8 | 27660469 | rs6989156  | 27725167 | rs4732757  | 0.484 |
| 8 | 27660469 | rs6989156  | 27729323 | rs17057911 | 0.422 |
| 8 | 27660469 | rs6989156  | 27729539 | rs17057923 | 0.483 |
| 8 | 27668810 | rs6989497  | 27694316 | rs1460224  | 0.376 |
| 8 | 27668810 | rs6989497  | 27725167 | rs4732757  | 0.347 |
| 8 | 27668810 | rs6989497  | 27729323 | rs17057911 | 0.326 |
| 8 | 27668810 | rs6989497  | 27729539 | rs17057923 | 0.367 |
| 8 | 27680859 | rs10091671 | 27706347 | rs4732754  | 0.220 |
| 8 | 27680859 | rs10091671 | 27772520 | rs7824383  | 0.456 |
| 8 | 27680859 | rs10091671 | 27787698 | rs6558023  | 0.266 |

|   |          |            |          |            |       |
|---|----------|------------|----------|------------|-------|
| 8 | 27694316 | rs1460224  | 27725167 | rs4732757  | 0.964 |
| 8 | 27694316 | rs1460224  | 27729323 | rs17057911 | 0.924 |
| 8 | 27694316 | rs1460224  | 27729539 | rs17057923 | 0.981 |
| 8 | 27725167 | rs4732757  | 27729323 | rs17057911 | 0.932 |
| 8 | 27725167 | rs4732757  | 27729539 | rs17057923 | 0.982 |
| 8 | 27729323 | rs17057911 | 27729539 | rs17057923 | 0.946 |
| 8 | 27772520 | rs7824383  | 27787698 | rs6558023  | 0.233 |
| 8 | 29142862 | rs719926   | 29152772 | rs6558102  | 0.546 |
| 8 | 30239111 | rs2938217  | 30845258 | rs323369   | 0.264 |
| 8 | 30239111 | rs2938217  | 30850713 | rs323375   | 0.271 |
| 8 | 30845258 | rs323369   | 30850713 | rs323375   | 0.992 |
| 8 | 31113009 | rs2737334  | 31133012 | rs2737339  | 0.820 |
| 8 | 31264379 | rs4733239  | 31266000 | rs7005168  | 0.719 |
| 8 | 31264379 | rs4733239  | 31266118 | rs6980510  | 0.719 |
| 8 | 31266000 | rs7005168  | 31266118 | rs6980510  | 1.000 |
| 8 | 32050583 | rs10503896 | 32057445 | rs1947734  | 0.539 |
| 8 | 32256855 | rs16879099 | 32256902 | rs16879101 | 1.000 |
| 8 | 34451364 | rs10088476 | 34561583 | rs7357540  | 0.535 |
| 8 | 34985910 | rs10503970 | 34988743 | rs6468300  | 0.231 |
| 8 | 35276445 | rs12216854 | 35423940 | rs10104759 | 0.200 |
| 8 | 35463388 | rs7001739  | 35475675 | rs10090689 | 0.874 |
| 8 | 35463388 | rs7001739  | 35476016 | rs4739412  | 0.790 |
| 8 | 35463388 | rs7001739  | 35523949 | rs12544168 | 0.799 |
| 8 | 35463388 | rs7001739  | 35531300 | rs6989128  | 0.466 |
| 8 | 35463388 | rs7001739  | 35534272 | rs983273   | 0.439 |
| 8 | 35463388 | rs7001739  | 35541296 | rs997084   | 0.424 |
| 8 | 35475675 | rs10090689 | 35476016 | rs4739412  | 0.927 |
| 8 | 35475675 | rs10090689 | 35523949 | rs12544168 | 0.794 |
| 8 | 35475675 | rs10090689 | 35531300 | rs6989128  | 0.606 |
| 8 | 35475675 | rs10090689 | 35534272 | rs983273   | 0.578 |
| 8 | 35475675 | rs10090689 | 35541296 | rs997084   | 0.563 |
| 8 | 35476016 | rs4739412  | 35523949 | rs12544168 | 0.772 |
| 8 | 35476016 | rs4739412  | 35531300 | rs6989128  | 0.587 |
| 8 | 35476016 | rs4739412  | 35534272 | rs983273   | 0.556 |
| 8 | 35476016 | rs4739412  | 35541296 | rs997084   | 0.539 |
| 8 | 35523949 | rs12544168 | 35531300 | rs6989128  | 0.559 |
| 8 | 35523949 | rs12544168 | 35534272 | rs983273   | 0.526 |
| 8 | 35523949 | rs12544168 | 35541296 | rs997084   | 0.509 |
| 8 | 35531300 | rs6989128  | 35534272 | rs983273   | 0.973 |
| 8 | 35531300 | rs6989128  | 35541296 | rs997084   | 0.959 |
| 8 | 35534272 | rs983273   | 35541296 | rs997084   | 0.986 |
| 8 | 36776986 | rs10090112 | 36780844 | rs12543523 | 0.608 |
| 8 | 39613659 | rs1376720  | 39639013 | rs9643868  | 0.317 |
| 8 | 39613659 | rs1376720  | 39640576 | rs6988389  | 0.317 |

|   |          |            |          |            |       |
|---|----------|------------|----------|------------|-------|
| 8 | 39639013 | rs9643868  | 39640576 | rs6988389  | 1.000 |
| 8 | 43198024 | rs9643892  | 43347778 | rs899853   | 0.516 |
| 8 | 43198024 | rs9643892  | 43618302 | rs7460686  | 0.311 |
| 8 | 43347778 | rs899853   | 43618302 | rs7460686  | 0.654 |
| 8 | 43449355 | rs4736856  | 43539989 | rs7463484  | 0.792 |
| 8 | 49758694 | rs900237   | 49880037 | rs10108023 | 0.501 |
| 8 | 50221260 | rs10081464 | 50255830 | rs1509086  | 0.403 |
| 8 | 50221260 | rs10081464 | 50257567 | rs17527    | 0.403 |
| 8 | 50221260 | rs10081464 | 50270223 | rs4873330  | 0.422 |
| 8 | 50255830 | rs1509086  | 50257567 | rs17527    | 1.000 |
| 8 | 50255830 | rs1509086  | 50270223 | rs4873330  | 0.926 |
| 8 | 50257567 | rs17527    | 50270223 | rs4873330  | 0.926 |
| 8 | 53304268 | rs16917539 | 53338179 | rs7461434  | 0.410 |
| 8 | 54065270 | rs12541632 | 54163602 | rs4873713  | 0.264 |
| 8 | 54065270 | rs12541632 | 54166313 | rs2376432  | 0.264 |
| 8 | 54065270 | rs12541632 | 54169597 | rs4873722  | 0.264 |
| 8 | 54065270 | rs12541632 | 54191589 | rs4873729  | 0.298 |
| 8 | 54065270 | rs12541632 | 54201931 | rs2717637  | 0.271 |
| 8 | 54071219 | rs360973   | 54108723 | rs4873692  | 0.871 |
| 8 | 54071219 | rs360973   | 54163602 | rs4873713  | 0.513 |
| 8 | 54071219 | rs360973   | 54166313 | rs2376432  | 0.513 |
| 8 | 54071219 | rs360973   | 54169597 | rs4873722  | 0.513 |
| 8 | 54071219 | rs360973   | 54191589 | rs4873729  | 0.459 |
| 8 | 54071219 | rs360973   | 54201931 | rs2717637  | 0.575 |
| 8 | 54071219 | rs360973   | 54269163 | rs7007275  | 0.251 |
| 8 | 54108723 | rs4873692  | 54163602 | rs4873713  | 0.537 |
| 8 | 54108723 | rs4873692  | 54166313 | rs2376432  | 0.537 |
| 8 | 54108723 | rs4873692  | 54169597 | rs4873722  | 0.537 |
| 8 | 54108723 | rs4873692  | 54191589 | rs4873729  | 0.483 |
| 8 | 54108723 | rs4873692  | 54201931 | rs2717637  | 0.613 |
| 8 | 54108723 | rs4873692  | 54269163 | rs7007275  | 0.254 |
| 8 | 54141127 | rs894915   | 54163602 | rs4873713  | 0.421 |
| 8 | 54141127 | rs894915   | 54166313 | rs2376432  | 0.421 |
| 8 | 54141127 | rs894915   | 54169597 | rs4873722  | 0.421 |
| 8 | 54141127 | rs894915   | 54191589 | rs4873729  | 0.395 |
| 8 | 54141127 | rs894915   | 54201931 | rs2717637  | 0.294 |
| 8 | 54163602 | rs4873713  | 54166313 | rs2376432  | 1.000 |
| 8 | 54163602 | rs4873713  | 54169597 | rs4873722  | 1.000 |
| 8 | 54163602 | rs4873713  | 54191589 | rs4873729  | 0.937 |
| 8 | 54163602 | rs4873713  | 54201931 | rs2717637  | 0.830 |
| 8 | 54166313 | rs2376432  | 54169597 | rs4873722  | 1.000 |
| 8 | 54166313 | rs2376432  | 54191589 | rs4873729  | 0.937 |
| 8 | 54166313 | rs2376432  | 54201931 | rs2717637  | 0.830 |
| 8 | 54169597 | rs4873722  | 54191589 | rs4873729  | 0.937 |

|   |          |            |          |            |       |
|---|----------|------------|----------|------------|-------|
| 8 | 54169597 | rs4873722  | 54201931 | rs2717637  | 0.830 |
| 8 | 54191589 | rs4873729  | 54201931 | rs2717637  | 0.886 |
| 8 | 56071878 | rs6991044  | 56073331 | rs4307317  | 0.978 |
| 8 | 57015415 | rs11985083 | 57024296 | rs16922464 | 0.523 |
| 8 | 57091969 | rs884422   | 57112918 | rs2668000  | 0.705 |
| 8 | 58198812 | rs1442125  | 58220209 | rs16921695 | 0.335 |
| 8 | 58198812 | rs1442125  | 58244139 | rs10958532 | 0.330 |
| 8 | 58198812 | rs1442125  | 58246609 | rs6994658  | 0.330 |
| 8 | 58198812 | rs1442125  | 58267466 | rs17194487 | 0.556 |
| 8 | 58198812 | rs1442125  | 58277829 | rs6982990  | 0.409 |
| 8 | 58198812 | rs1442125  | 58320625 | rs17804870 | 0.471 |
| 8 | 58198812 | rs1442125  | 58323993 | rs17805110 | 0.429 |
| 8 | 58198812 | rs1442125  | 58332087 | rs17805326 | 0.235 |
| 8 | 58198812 | rs1442125  | 58332352 | rs17805332 | 0.235 |
| 8 | 58220209 | rs16921695 | 58244139 | rs10958532 | 0.991 |
| 8 | 58220209 | rs16921695 | 58246609 | rs6994658  | 0.991 |
| 8 | 58220209 | rs16921695 | 58267466 | rs17194487 | 0.264 |
| 8 | 58220209 | rs16921695 | 58277829 | rs6982990  | 0.373 |
| 8 | 58220209 | rs16921695 | 58320625 | rs17804870 | 0.222 |
| 8 | 58220209 | rs16921695 | 58323993 | rs17805110 | 0.287 |
| 8 | 58244139 | rs10958532 | 58246609 | rs6994658  | 1.000 |
| 8 | 58244139 | rs10958532 | 58267466 | rs17194487 | 0.271 |
| 8 | 58244139 | rs10958532 | 58277829 | rs6982990  | 0.384 |
| 8 | 58244139 | rs10958532 | 58320625 | rs17804870 | 0.229 |
| 8 | 58244139 | rs10958532 | 58323993 | rs17805110 | 0.295 |
| 8 | 58246609 | rs6994658  | 58267466 | rs17194487 | 0.271 |
| 8 | 58246609 | rs6994658  | 58277829 | rs6982990  | 0.384 |
| 8 | 58246609 | rs6994658  | 58320625 | rs17804870 | 0.229 |
| 8 | 58246609 | rs6994658  | 58323993 | rs17805110 | 0.295 |
| 8 | 58267466 | rs17194487 | 58277829 | rs6982990  | 0.561 |
| 8 | 58267466 | rs17194487 | 58320625 | rs17804870 | 0.910 |
| 8 | 58267466 | rs17194487 | 58323993 | rs17805110 | 0.712 |
| 8 | 58267466 | rs17194487 | 58332087 | rs17805326 | 0.542 |
| 8 | 58267466 | rs17194487 | 58332352 | rs17805332 | 0.542 |
| 8 | 58277829 | rs6982990  | 58320625 | rs17804870 | 0.486 |
| 8 | 58277829 | rs6982990  | 58323993 | rs17805110 | 0.548 |
| 8 | 58277829 | rs6982990  | 58332087 | rs17805326 | 0.448 |
| 8 | 58277829 | rs6982990  | 58332352 | rs17805332 | 0.447 |
| 8 | 58320625 | rs17804870 | 58323993 | rs17805110 | 0.718 |
| 8 | 58320625 | rs17804870 | 58332087 | rs17805326 | 0.551 |
| 8 | 58320625 | rs17804870 | 58332352 | rs17805332 | 0.551 |
| 8 | 58323993 | rs17805110 | 58332087 | rs17805326 | 0.558 |
| 8 | 58323993 | rs17805110 | 58332352 | rs17805332 | 0.557 |
| 8 | 58332087 | rs17805326 | 58332352 | rs17805332 | 1.000 |

|   |          |            |          |            |       |
|---|----------|------------|----------|------------|-------|
| 8 | 59516088 | rs13277801 | 59532713 | rs6985620  | 0.924 |
| 8 | 60964005 | rs4607595  | 61009822 | rs6985045  | 0.675 |
| 8 | 62991951 | rs7840865  | 62994726 | rs1864731  | 0.748 |
| 8 | 62991951 | rs7840865  | 63000615 | rs7842255  | 0.746 |
| 8 | 62991951 | rs7840865  | 63084209 | rs16928166 | 0.281 |
| 8 | 62991951 | rs7840865  | 63113409 | rs16928311 | 0.269 |
| 8 | 62991951 | rs7840865  | 63116802 | rs16928335 | 0.269 |
| 8 | 62991951 | rs7840865  | 63170923 | rs6990341  | 0.227 |
| 8 | 62994726 | rs1864731  | 63000615 | rs7842255  | 0.972 |
| 8 | 62994726 | rs1864731  | 63084209 | rs16928166 | 0.271 |
| 8 | 62994726 | rs1864731  | 63113409 | rs16928311 | 0.255 |
| 8 | 62994726 | rs1864731  | 63116802 | rs16928335 | 0.255 |
| 8 | 62994726 | rs1864731  | 63170923 | rs6990341  | 0.329 |
| 8 | 63000615 | rs7842255  | 63084209 | rs16928166 | 0.281 |
| 8 | 63000615 | rs7842255  | 63113409 | rs16928311 | 0.265 |
| 8 | 63000615 | rs7842255  | 63116802 | rs16928335 | 0.265 |
| 8 | 63000615 | rs7842255  | 63170923 | rs6990341  | 0.337 |
| 8 | 63084209 | rs16928166 | 63113409 | rs16928311 | 0.954 |
| 8 | 63084209 | rs16928166 | 63116802 | rs16928335 | 0.954 |
| 8 | 63113409 | rs16928311 | 63116802 | rs16928335 | 1.000 |
| 8 | 66626227 | rs11777025 | 66632480 | rs11781358 | 0.794 |
| 8 | 66626227 | rs11777025 | 66677508 | rs14213    | 0.341 |
| 8 | 66626227 | rs11777025 | 66678337 | rs1053088  | 0.341 |
| 8 | 66632480 | rs11781358 | 66677508 | rs14213    | 0.301 |
| 8 | 66632480 | rs11781358 | 66678337 | rs1053088  | 0.301 |
| 8 | 66677508 | rs14213    | 66678337 | rs1053088  | 1.000 |
| 8 | 67214949 | rs7831234  | 67229334 | rs9694082  | 0.709 |
| 8 | 67214949 | rs7831234  | 67231942 | rs7822243  | 0.709 |
| 8 | 67214949 | rs7831234  | 67245286 | rs6999100  | 0.563 |
| 8 | 67229334 | rs9694082  | 67231942 | rs7822243  | 1.000 |
| 8 | 67229334 | rs9694082  | 67245286 | rs6999100  | 0.804 |
| 8 | 67231942 | rs7822243  | 67245286 | rs6999100  | 0.799 |
| 8 | 68754736 | rs2114051  | 68762513 | rs6472330  | 0.578 |
| 8 | 68754736 | rs2114051  | 68770846 | rs2380427  | 0.551 |
| 8 | 68754736 | rs2114051  | 68777945 | rs2553651  | 0.773 |
| 8 | 68754736 | rs2114051  | 68779823 | rs2217028  | 0.528 |
| 8 | 68762513 | rs6472330  | 68770846 | rs2380427  | 0.941 |
| 8 | 68762513 | rs6472330  | 68777945 | rs2553651  | 0.451 |
| 8 | 68762513 | rs6472330  | 68779823 | rs2217028  | 0.932 |
| 8 | 68770846 | rs2380427  | 68777945 | rs2553651  | 0.455 |
| 8 | 68770846 | rs2380427  | 68779823 | rs2217028  | 0.974 |
| 8 | 68777945 | rs2553651  | 68779823 | rs2217028  | 0.460 |
| 8 | 71208965 | rs4074358  | 71251571 | rs10504469 | 1.000 |
| 8 | 73210302 | rs16938055 | 73215633 | rs10504532 | 0.486 |

|   |           |            |           |            |       |
|---|-----------|------------|-----------|------------|-------|
| 8 | 73210302  | rs16938055 | 73230236  | rs4363243  | 0.301 |
| 8 | 73705254  | rs13253101 | 73742670  | rs2246785  | 0.288 |
| 8 | 73742670  | rs2246785  | 74189026  | rs11992054 | 0.244 |
| 8 | 75037912  | rs12541216 | 75038119  | rs10504552 | 1.000 |
| 8 | 75189439  | rs6987422  | 75199459  | rs41421651 | 0.356 |
| 8 | 75221845  | rs2912302  | 75238861  | rs1875064  | 1.000 |
| 8 | 75221845  | rs2912302  | 75247824  | rs2977056  | 0.663 |
| 8 | 75221845  | rs2912302  | 75251256  | rs2936680  | 0.760 |
| 8 | 75238861  | rs1875064  | 75247824  | rs2977056  | 0.663 |
| 8 | 75238861  | rs1875064  | 75251256  | rs2936680  | 0.760 |
| 8 | 75247824  | rs2977056  | 75251256  | rs2936680  | 0.831 |
| 8 | 75306307  | rs10957702 | 75342192  | rs2977046  | 0.247 |
| 8 | 77072706  | rs12543819 | 77088796  | rs863813   | 0.767 |
| 8 | 77072706  | rs12543819 | 77100509  | rs830435   | 0.691 |
| 8 | 77088796  | rs863813   | 77100509  | rs830435   | 0.476 |
| 8 | 80381470  | rs2169149  | 80389955  | rs1460162  | 0.644 |
| 8 | 80381470  | rs2169149  | 80390003  | rs1460163  | 1.000 |
| 8 | 80389955  | rs1460162  | 80390003  | rs1460163  | 0.644 |
| 8 | 84276448  | rs7829784  | 84277905  | rs2090880  | 0.859 |
| 8 | 84276448  | rs7829784  | 84675888  | rs7007038  | 0.306 |
| 8 | 84277905  | rs2090880  | 84675888  | rs7007038  | 0.270 |
| 8 | 87764021  | rs7842410  | 87835529  | rs1458132  | 0.480 |
| 8 | 87953076  | rs6468519  | 87974367  | rs10955093 | 0.835 |
| 8 | 88872232  | rs7840637  | 88880870  | rs7824648  | 0.278 |
| 8 | 96252193  | rs297571   | 96254526  | rs17668689 | 0.237 |
| 8 | 96664912  | rs3104964  | 96714775  | rs6471550  | 0.371 |
| 8 | 98348127  | rs2053480  | 98351602  | rs1835744  | 0.294 |
| 8 | 98691409  | rs2512423  | 98691491  | rs2512424  | 0.983 |
| 8 | 103635402 | rs998200   | 103636875 | rs2436896  | 0.922 |
| 8 | 103635402 | rs998200   | 103638274 | rs2248178  | 0.824 |
| 8 | 103635402 | rs998200   | 103638355 | rs2248172  | 0.824 |
| 8 | 103636875 | rs2436896  | 103638274 | rs2248178  | 0.892 |
| 8 | 103636875 | rs2436896  | 103638355 | rs2248172  | 0.892 |
| 8 | 103638274 | rs2248178  | 103638355 | rs2248172  | 1.000 |
| 8 | 106062241 | rs11784380 | 106121519 | rs3101274  | 0.454 |
| 8 | 109754362 | rs904174   | 109756487 | rs904175   | 0.818 |
| 8 | 109754362 | rs904174   | 109769766 | rs3019417  | 0.281 |
| 8 | 109754362 | rs904174   | 109775285 | rs4735075  | 0.811 |
| 8 | 109756487 | rs904175   | 109769766 | rs3019417  | 0.423 |
| 8 | 109756487 | rs904175   | 109775285 | rs4735075  | 0.961 |
| 8 | 109769766 | rs3019417  | 109775285 | rs4735075  | 0.409 |
| 8 | 110651938 | rs2703388  | 110663324 | rs2844235  | 0.794 |
| 8 | 111243309 | rs13272142 | 111253247 | rs2350728  | 0.212 |
| 8 | 111988767 | rs11785408 | 112011935 | rs7388152  | 0.259 |



|   |           |            |           |            |       |
|---|-----------|------------|-----------|------------|-------|
| 8 | 111988767 | rs11785408 | 112260608 | rs1427181  | 0.206 |
| 8 | 112812615 | rs9297452  | 112845541 | rs6469379  | 0.944 |
| 8 | 112812615 | rs9297452  | 112898378 | rs1397367  | 0.843 |
| 8 | 112845541 | rs6469379  | 112898378 | rs1397367  | 0.815 |
| 8 | 116521516 | rs3808409  | 116666214 | rs2272619  | 0.513 |
| 8 | 117576668 | rs6997203  | 117579310 | rs11775732 | 0.958 |
| 8 | 118740648 | rs4604472  | 118770631 | rs1508566  | 0.580 |
| 8 | 122585726 | rs1542683  | 122592919 | rs2385922  | 0.767 |
| 8 | 123498651 | rs11781643 | 123513831 | rs6993726  | 0.961 |
| 8 | 124710187 | rs16898637 | 124715203 | rs12545556 | 0.533 |
| 8 | 124710187 | rs16898637 | 124719608 | rs11777302 | 0.250 |
| 8 | 124715203 | rs12545556 | 124719608 | rs11777302 | 0.262 |
| 8 | 124715203 | rs12545556 | 124735468 | rs4374971  | 0.203 |
| 8 | 124715203 | rs12545556 | 124736503 | rs6470170  | 0.203 |
| 8 | 124719608 | rs11777302 | 124722976 | rs13261694 | 0.552 |
| 8 | 124719608 | rs11777302 | 124735468 | rs4374971  | 0.469 |
| 8 | 124719608 | rs11777302 | 124736503 | rs6470170  | 0.469 |
| 8 | 124722976 | rs13261694 | 124735468 | rs4374971  | 0.287 |
| 8 | 124722976 | rs13261694 | 124736503 | rs6470170  | 0.287 |
| 8 | 124735468 | rs4374971  | 124736503 | rs6470170  | 1.000 |
| 8 | 125337303 | rs16899480 | 125366053 | rs17296667 | 0.453 |
| 8 | 128051271 | rs4871004  | 128055648 | rs2392683  | 0.834 |
| 8 | 128051271 | rs4871004  | 128095310 | rs710885   | 0.776 |
| 8 | 128055648 | rs2392683  | 128095310 | rs710885   | 0.682 |
| 8 | 128902659 | rs7829132  | 128909458 | rs4733792  | 0.983 |
| 8 | 128902659 | rs7829132  | 128913644 | rs4733797  | 0.811 |
| 8 | 128902659 | rs7829132  | 128926090 | rs4332094  | 0.243 |
| 8 | 128902659 | rs7829132  | 128927871 | rs13259137 | 0.493 |
| 8 | 128909458 | rs4733792  | 128913644 | rs4733797  | 0.810 |
| 8 | 128909458 | rs4733792  | 128926090 | rs4332094  | 0.249 |
| 8 | 128909458 | rs4733792  | 128927871 | rs13259137 | 0.498 |
| 8 | 128913644 | rs4733797  | 128926090 | rs4332094  | 0.227 |
| 8 | 128913644 | rs4733797  | 128927871 | rs13259137 | 0.617 |
| 8 | 128926090 | rs4332094  | 128927871 | rs13259137 | 0.339 |
| 8 | 130362958 | rs4733695  | 130368674 | rs4480081  | 0.686 |
| 8 | 131739875 | rs17312795 | 131814746 | rs1876882  | 0.904 |
| 8 | 134609061 | rs2978015  | 134617753 | rs2978023  | 0.542 |
| 8 | 136956284 | rs4130250  | 136994256 | rs6997347  | 0.443 |
| 8 | 137082629 | rs1868368  | 137105435 | rs6577701  | 0.253 |
| 8 | 137082629 | rs1868368  | 137113539 | rs13266231 | 0.269 |
| 8 | 137092988 | rs10505642 | 137094522 | rs6994909  | 0.880 |
| 8 | 137092988 | rs10505642 | 137094596 | rs4909537  | 0.981 |
| 8 | 137092988 | rs10505642 | 137105435 | rs6577701  | 0.533 |
| 8 | 137092988 | rs10505642 | 137113539 | rs13266231 | 0.487 |

|   |           |            |           |            |       |
|---|-----------|------------|-----------|------------|-------|
| 8 | 137094522 | rs6994909  | 137094596 | rs4909537  | 0.897 |
| 8 | 137094522 | rs6994909  | 137105435 | rs6577701  | 0.479 |
| 8 | 137094522 | rs6994909  | 137113539 | rs13266231 | 0.414 |
| 8 | 137094596 | rs4909537  | 137105435 | rs6577701  | 0.549 |
| 8 | 137094596 | rs4909537  | 137113539 | rs13266231 | 0.487 |
| 8 | 137105435 | rs6577701  | 137113539 | rs13266231 | 0.943 |
| 8 | 138673785 | rs28483233 | 138682350 | rs6577810  | 0.622 |
| 8 | 138673785 | rs28483233 | 138684814 | rs4489355  | 0.639 |
| 8 | 138682350 | rs6577810  | 138684814 | rs4489355  | 0.979 |
| 8 | 138987482 | rs2705295  | 138988883 | rs2705291  | 1.000 |
| 8 | 138987482 | rs2705295  | 139012095 | rs2705285  | 0.202 |
| 8 | 138988883 | rs2705291  | 139012095 | rs2705285  | 0.202 |
| 8 | 139012095 | rs2705285  | 139034394 | rs2668129  | 0.917 |
| 8 | 139940650 | rs12114311 | 139943056 | rs11166850 | 0.389 |
| 8 | 140232633 | rs4074554  | 140237822 | rs11166882 | 1.000 |
| 8 | 140236061 | rs6577996  | 140272967 | rs6578008  | 0.904 |
| 8 | 141145379 | rs883613   | 141145805 | rs9987138  | 0.209 |
| 8 | 141669401 | rs6983924  | 141680246 | rs938726   | 0.625 |
| 8 | 141669401 | rs6983924  | 141711737 | rs4961226  | 0.223 |
| 8 | 141669401 | rs6983924  | 141712113 | rs6987810  | 0.213 |
| 8 | 141711737 | rs4961226  | 141712113 | rs6987810  | 0.268 |
| 9 | 1061814   | rs7043337  | 1063114   | rs1876752  | 0.923 |
| 9 | 1707031   | rs10962856 | 1707158   | rs10962859 | 0.429 |
| 9 | 1707031   | rs10962856 | 1715917   | rs1904091  | 0.872 |
| 9 | 1707158   | rs10962859 | 1715917   | rs1904091  | 0.373 |
| 9 | 2333547   | rs2210398  | 2351176   | rs871786   | 0.807 |
| 9 | 4109707   | rs806051   | 4117906   | rs529420   | 0.340 |
| 9 | 4824394   | rs457287   | 4824597   | rs461130   | 0.868 |
| 9 | 6243571   | rs10975519 | 6245319   | rs7047921  | 0.979 |
| 9 | 6258204   | rs2039386  | 6421946   | rs10758790 | 0.518 |
| 9 | 6397799   | rs10758783 | 6421946   | rs10758790 | 0.244 |
| 9 | 6964900   | rs1570507  | 6967233   | rs10491778 | 0.975 |
| 9 | 6964900   | rs1570507  | 6968691   | rs1323410  | 0.964 |
| 9 | 6964900   | rs1570507  | 7041826   | rs7019027  | 0.264 |
| 9 | 6967233   | rs10491778 | 6968691   | rs1323410  | 0.988 |
| 9 | 6967233   | rs10491778 | 7041826   | rs7019027  | 0.250 |
| 9 | 6968691   | rs1323410  | 7041826   | rs7019027  | 0.243 |
| 9 | 7041826   | rs7019027  | 7062065   | rs4740869  | 0.850 |
| 9 | 8279350   | rs10976918 | 8322307   | rs16927547 | 0.224 |
| 9 | 8568551   | rs7023351  | 8625791   | rs1512380  | 0.223 |
| 9 | 8568551   | rs7023351  | 8636183   | rs16928238 | 0.365 |
| 9 | 8594583   | rs17573565 | 8625791   | rs1512380  | 0.312 |
| 9 | 8594583   | rs17573565 | 8636183   | rs16928238 | 0.417 |
| 9 | 8625791   | rs1512380  | 8636183   | rs16928238 | 0.713 |

|   |          |            |          |            |       |
|---|----------|------------|----------|------------|-------|
| 9 | 8863732  | rs10759011 | 8863866  | rs10739174 | 0.346 |
| 9 | 11459190 | rs10959841 | 11481500 | rs10491950 | 0.441 |
| 9 | 15704658 | rs7847144  | 15704811 | rs6474954  | 0.915 |
| 9 | 15704658 | rs7847144  | 15773266 | rs4146291  | 0.599 |
| 9 | 15704658 | rs7847144  | 15942197 | rs10810502 | 0.458 |
| 9 | 15704811 | rs6474954  | 15773266 | rs4146291  | 0.521 |
| 9 | 15704811 | rs6474954  | 15942197 | rs10810502 | 0.393 |
| 9 | 15773266 | rs4146291  | 15942197 | rs10810502 | 0.737 |
| 9 | 15852959 | rs770193   | 15994012 | rs1887665  | 0.323 |
| 9 | 16185381 | rs16934205 | 16186674 | rs12005826 | 0.864 |
| 9 | 16509926 | rs10756757 | 16553123 | rs10756762 | 0.646 |
| 9 | 16509926 | rs10756757 | 16635894 | rs10810581 | 0.521 |
| 9 | 16553123 | rs10756762 | 16635894 | rs10810581 | 0.484 |
| 9 | 16686187 | rs1888207  | 16686510 | rs10738446 | 0.982 |
| 9 | 16686187 | rs1888207  | 16696012 | rs2297176  | 0.958 |
| 9 | 16686187 | rs1888207  | 16792973 | rs2254330  | 0.232 |
| 9 | 16686510 | rs10738446 | 16696012 | rs2297176  | 0.956 |
| 9 | 16686510 | rs10738446 | 16792973 | rs2254330  | 0.228 |
| 9 | 16696012 | rs2297176  | 16792973 | rs2254330  | 0.250 |
| 9 | 16720653 | rs1856132  | 16796521 | rs12351269 | 0.585 |
| 9 | 17926235 | rs10963347 | 17946618 | rs10963360 | 0.515 |
| 9 | 17926235 | rs10963347 | 17955723 | rs16936157 | 0.381 |
| 9 | 17946618 | rs10963360 | 17955723 | rs16936157 | 0.640 |
| 9 | 18808890 | rs10156461 | 18852658 | rs7862903  | 0.281 |
| 9 | 18852658 | rs7862903  | 19409446 | rs7046518  | 0.203 |
| 9 | 22699756 | rs647549   | 22723238 | rs555828   | 0.695 |
| 9 | 24949557 | rs10114899 | 24991219 | rs4507853  | 0.652 |
| 9 | 25316440 | rs7038072  | 25332777 | rs10966868 | 0.813 |
| 9 | 27187673 | rs606342   | 27193134 | rs638203   | 0.884 |
| 9 | 29654138 | rs10969315 | 29661982 | rs10969317 | 0.916 |
| 9 | 31143406 | rs10758026 | 31154389 | rs1414025  | 0.789 |
| 9 | 31701586 | rs10970497 | 31702096 | rs12550877 | 0.979 |
| 9 | 33117640 | rs10813950 | 33118021 | rs10813951 | 0.635 |
| 9 | 33117640 | rs10813950 | 33143527 | rs10813957 | 0.635 |
| 9 | 33118021 | rs10813951 | 33143527 | rs10813957 | 1.000 |
| 9 | 36720774 | rs10758392 | 36724872 | rs7043503  | 0.520 |
| 9 | 36720774 | rs10758392 | 36724901 | rs7043808  | 0.520 |
| 9 | 36720774 | rs10758392 | 36726811 | rs10738976 | 0.474 |
| 9 | 36724872 | rs7043503  | 36724901 | rs7043808  | 1.000 |
| 9 | 36724872 | rs7043503  | 36726811 | rs10738976 | 0.955 |
| 9 | 36724901 | rs7043808  | 36726811 | rs10738976 | 0.955 |
| 9 | 36965108 | rs10814496 | 36979054 | rs4880048  | 0.465 |
| 9 | 38190215 | rs2585667  | 38190670 | rs2585668  | 0.991 |
| 9 | 71625533 | rs17439752 | 71638815 | rs10521434 | 0.942 |

|   |          |            |          |            |       |
|---|----------|------------|----------|------------|-------|
| 9 | 72984279 | rs7469513  | 72984412 | rs10868968 | 0.991 |
| 9 | 72984279 | rs7469513  | 72984608 | rs11142716 | 0.991 |
| 9 | 72984279 | rs7469513  | 72997021 | rs6560186  | 0.974 |
| 9 | 72984279 | rs7469513  | 73001077 | rs10746864 | 0.974 |
| 9 | 72984279 | rs7469513  | 73014929 | rs2174306  | 0.958 |
| 9 | 72984279 | rs7469513  | 73017626 | rs1354458  | 0.596 |
| 9 | 72984279 | rs7469513  | 73022306 | rs12346443 | 0.911 |
| 9 | 72984279 | rs7469513  | 73059780 | rs11142756 | 0.856 |
| 9 | 72984412 | rs10868968 | 72984608 | rs11142716 | 1.000 |
| 9 | 72984412 | rs10868968 | 72997021 | rs6560186  | 0.983 |
| 9 | 72984412 | rs10868968 | 73001077 | rs10746864 | 0.983 |
| 9 | 72984412 | rs10868968 | 73014929 | rs2174306  | 0.969 |
| 9 | 72984412 | rs10868968 | 73017626 | rs1354458  | 0.601 |
| 9 | 72984412 | rs10868968 | 73022306 | rs12346443 | 0.919 |
| 9 | 72984412 | rs10868968 | 73059780 | rs11142756 | 0.865 |
| 9 | 72984608 | rs11142716 | 72997021 | rs6560186  | 0.982 |
| 9 | 72984608 | rs11142716 | 73001077 | rs10746864 | 0.982 |
| 9 | 72984608 | rs11142716 | 73014929 | rs2174306  | 0.968 |
| 9 | 72984608 | rs11142716 | 73017626 | rs1354458  | 0.602 |
| 9 | 72984608 | rs11142716 | 73022306 | rs12346443 | 0.918 |
| 9 | 72984608 | rs11142716 | 73059780 | rs11142756 | 0.864 |
| 9 | 72997021 | rs6560186  | 73001077 | rs10746864 | 1.000 |
| 9 | 72997021 | rs6560186  | 73014929 | rs2174306  | 0.989 |
| 9 | 72997021 | rs6560186  | 73017626 | rs1354458  | 0.621 |
| 9 | 72997021 | rs6560186  | 73022306 | rs12346443 | 0.934 |
| 9 | 72997021 | rs6560186  | 73059780 | rs11142756 | 0.883 |
| 9 | 73001077 | rs10746864 | 73014929 | rs2174306  | 0.989 |
| 9 | 73001077 | rs10746864 | 73017626 | rs1354458  | 0.621 |
| 9 | 73001077 | rs10746864 | 73022306 | rs12346443 | 0.934 |
| 9 | 73001077 | rs10746864 | 73059780 | rs11142756 | 0.883 |
| 9 | 73014929 | rs2174306  | 73017626 | rs1354458  | 0.601 |
| 9 | 73014929 | rs2174306  | 73022306 | rs12346443 | 0.910 |
| 9 | 73014929 | rs2174306  | 73059780 | rs11142756 | 0.862 |
| 9 | 73017626 | rs1354458  | 73022306 | rs12346443 | 0.556 |
| 9 | 73017626 | rs1354458  | 73059780 | rs11142756 | 0.518 |
| 9 | 73022306 | rs12346443 | 73059780 | rs11142756 | 0.832 |
| 9 | 73518742 | rs3780610  | 73569079 | rs12379790 | 0.424 |
| 9 | 74047938 | rs4130866  | 74073145 | rs1322479  | 0.287 |
| 9 | 77630293 | rs11144637 | 77646521 | rs7031123  | 0.556 |
| 9 | 78766008 | rs7852521  | 78766827 | rs7856464  | 0.321 |
| 9 | 81236271 | rs13298282 | 81264935 | rs10491787 | 0.788 |
| 9 | 81236271 | rs13298282 | 81266285 | rs11138241 | 0.785 |
| 9 | 81236271 | rs13298282 | 81267705 | rs17427625 | 0.859 |
| 9 | 81236271 | rs13298282 | 81286014 | rs10491791 | 0.717 |

|   |          |            |          |            |       |
|---|----------|------------|----------|------------|-------|
| 9 | 81264935 | rs10491787 | 81266285 | rs11138241 | 1.000 |
| 9 | 81264935 | rs10491787 | 81267705 | rs17427625 | 0.877 |
| 9 | 81264935 | rs10491787 | 81286014 | rs10491791 | 0.805 |
| 9 | 81264935 | rs10491787 | 81306157 | rs17082511 | 0.202 |
| 9 | 81266285 | rs11138241 | 81267705 | rs17427625 | 0.876 |
| 9 | 81266285 | rs11138241 | 81286014 | rs10491791 | 0.802 |
| 9 | 81267705 | rs17427625 | 81286014 | rs10491791 | 0.783 |
| 9 | 81286014 | rs10491791 | 81306157 | rs17082511 | 0.202 |
| 9 | 83444937 | rs947673   | 83452715 | rs4877221  | 0.836 |
| 9 | 84589743 | rs4877708  | 84590086 | rs4877709  | 0.445 |
| 9 | 85856918 | rs973460   | 85861585 | rs7033778  | 0.888 |
| 9 | 85856918 | rs973460   | 85863663 | rs1436932  | 0.888 |
| 9 | 85861585 | rs7033778  | 85863663 | rs1436932  | 1.000 |
| 9 | 86039924 | rs7026159  | 86062589 | rs7848051  | 0.774 |
| 9 | 86039924 | rs7026159  | 86095927 | rs6559779  | 0.248 |
| 9 | 86039924 | rs7026159  | 86099255 | rs885003   | 0.236 |
| 9 | 86039924 | rs7026159  | 86106730 | rs12342617 | 0.413 |
| 9 | 86059945 | rs1932649  | 86061696 | rs11140475 | 0.652 |
| 9 | 86062589 | rs7848051  | 86095927 | rs6559779  | 0.275 |
| 9 | 86062589 | rs7848051  | 86099255 | rs885003   | 0.255 |
| 9 | 86062589 | rs7848051  | 86106730 | rs12342617 | 0.547 |
| 9 | 86095927 | rs6559779  | 86099255 | rs885003   | 0.906 |
| 9 | 86095927 | rs6559779  | 86106730 | rs12342617 | 0.465 |
| 9 | 86099255 | rs885003   | 86106730 | rs12342617 | 0.521 |
| 9 | 86115568 | rs11140507 | 86115666 | rs10780660 | 0.943 |
| 9 | 86115568 | rs11140507 | 86116127 | rs10780661 | 0.872 |
| 9 | 86115568 | rs11140507 | 86116712 | rs11140508 | 0.706 |
| 9 | 86115666 | rs10780660 | 86116127 | rs10780661 | 0.928 |
| 9 | 86115666 | rs10780660 | 86116712 | rs11140508 | 0.750 |
| 9 | 86116127 | rs10780661 | 86116712 | rs11140508 | 0.716 |
| 9 | 86772647 | rs984430   | 86803143 | rs4877895  | 0.215 |
| 9 | 89082420 | rs927524   | 89122734 | rs6559978  | 0.307 |
| 9 | 89360808 | rs11141879 | 89361340 | rs7852573  | 1.000 |
| 9 | 91733701 | rs7025971  | 91766807 | rs10993331 | 0.277 |
| 9 | 92696806 | rs158690   | 92698773 | rs12344755 | 0.720 |
| 9 | 93315663 | rs7039956  | 93350488 | rs6479357  | 0.536 |
| 9 | 94040930 | rs471478   | 94099611 | rs710162   | 0.676 |
| 9 | 94040930 | rs471478   | 94191198 | rs7853859  | 0.556 |
| 9 | 94040930 | rs471478   | 94599326 | rs10992471 | 0.460 |
| 9 | 94099611 | rs710162   | 94191198 | rs7853859  | 0.819 |
| 9 | 94099611 | rs710162   | 94599326 | rs10992471 | 0.426 |
| 9 | 94191198 | rs7853859  | 94599326 | rs10992471 | 0.352 |
| 9 | 95125191 | rs3001450  | 95285108 | rs11791374 | 0.225 |
| 9 | 95125191 | rs3001450  | 95311188 | rs10821147 | 0.228 |

|   |           |            |           |            |       |
|---|-----------|------------|-----------|------------|-------|
| 9 | 95285108  | rs11791374 | 95311188  | rs10821147 | 0.928 |
| 9 | 95285108  | rs11791374 | 95391038  | rs10761238 | 0.617 |
| 9 | 95311188  | rs10821147 | 95391038  | rs10761238 | 0.684 |
| 9 | 96878602  | rs7033633  | 97026515  | rs356689   | 0.862 |
| 9 | 97417012  | rs4743091  | 97422771  | rs7854560  | 0.650 |
| 9 | 97548449  | rs4743271  | 97548530  | rs4743272  | 1.000 |
| 9 | 99573968  | rs1877431  | 99663198  | rs993501   | 0.381 |
| 9 | 103033320 | rs2052977  | 103061577 | rs12237965 | 0.646 |
| 9 | 104162114 | rs10990034 | 104167500 | rs10990041 | 1.000 |
| 9 | 110341967 | rs7044959  | 110348705 | rs10979392 | 0.818 |
| 9 | 110341967 | rs7044959  | 110375089 | rs10979405 | 0.226 |
| 9 | 110341967 | rs7044959  | 110375416 | rs12551911 | 0.314 |
| 9 | 110348705 | rs10979392 | 110375089 | rs10979405 | 0.281 |
| 9 | 110348705 | rs10979392 | 110375416 | rs12551911 | 0.377 |
| 9 | 110375089 | rs10979405 | 110375416 | rs12551911 | 0.914 |
| 9 | 110449978 | rs2900469  | 110488445 | rs16913434 | 0.229 |
| 9 | 110464975 | rs1994807  | 110488445 | rs16913434 | 0.584 |
| 9 | 110595461 | rs10116332 | 110627972 | rs4339712  | 0.400 |
| 9 | 110643188 | rs13296942 | 110661885 | rs10114192 | 0.480 |
| 9 | 113127517 | rs866624   | 113184850 | rs6477821  | 0.829 |
| 9 | 113127517 | rs866624   | 113203078 | rs4978996  | 0.836 |
| 9 | 113127517 | rs866624   | 113209951 | rs12350676 | 0.234 |
| 9 | 113127517 | rs866624   | 113258768 | rs4978998  | 0.726 |
| 9 | 113127517 | rs866624   | 113322866 | rs4448355  | 0.240 |
| 9 | 113184850 | rs6477821  | 113203078 | rs4978996  | 0.991 |
| 9 | 113184850 | rs6477821  | 113209951 | rs12350676 | 0.283 |
| 9 | 113184850 | rs6477821  | 113258768 | rs4978998  | 0.902 |
| 9 | 113184850 | rs6477821  | 113322866 | rs4448355  | 0.265 |
| 9 | 113203078 | rs4978996  | 113209951 | rs12350676 | 0.279 |
| 9 | 113203078 | rs4978996  | 113258768 | rs4978998  | 0.893 |
| 9 | 113203078 | rs4978996  | 113322866 | rs4448355  | 0.269 |
| 9 | 113209951 | rs12350676 | 113258768 | rs4978998  | 0.328 |
| 9 | 113209951 | rs12350676 | 113322866 | rs4448355  | 0.416 |
| 9 | 113258768 | rs4978998  | 113322866 | rs4448355  | 0.317 |
| 9 | 117212106 | rs1989766  | 117290615 | rs1858731  | 0.300 |
| 9 | 118449459 | rs2900132  | 118514893 | rs10983314 | 0.698 |
| 9 | 118449459 | rs2900132  | 118523287 | rs10983319 | 0.485 |
| 9 | 118514893 | rs10983314 | 118523287 | rs10983319 | 0.399 |
| 9 | 119229592 | rs10983650 | 119231794 | rs1415377  | 0.927 |
| 9 | 120710357 | rs10984298 | 120751241 | rs10984333 | 0.821 |
| 9 | 120710357 | rs10984298 | 120763836 | rs4512453  | 0.247 |
| 9 | 120751241 | rs10984333 | 120763836 | rs4512453  | 0.213 |
| 9 | 122907291 | rs7022941  | 123075201 | rs10739594 | 0.347 |
| 9 | 124039773 | rs10818653 | 124044926 | rs10760215 | 0.481 |

|    |           |            |           |            |       |
|----|-----------|------------|-----------|------------|-------|
| 9  | 124039773 | rs10818653 | 124065983 | rs10760220 | 0.468 |
| 9  | 124044926 | rs10760215 | 124065983 | rs10760220 | 0.982 |
| 9  | 126269939 | rs10818977 | 126425430 | rs4076333  | 0.346 |
| 9  | 129146599 | rs7863063  | 129165005 | rs10987613 | 0.252 |
| 9  | 130281629 | rs4837271  | 130329421 | rs869455   | 0.674 |
| 9  | 130281629 | rs4837271  | 130343343 | rs10760563 | 0.685 |
| 9  | 130329421 | rs869455   | 130343343 | rs10760563 | 0.988 |
| 9  | 133448145 | rs3765543  | 133522233 | rs6597515  | 0.216 |
| 9  | 134162233 | rs2296869  | 134162486 | rs2296870  | 0.946 |
| 9  | 134162233 | rs2296869  | 134163506 | rs2296871  | 0.991 |
| 9  | 134162486 | rs2296870  | 134163506 | rs2296871  | 0.928 |
| 9  | 137144989 | rs10858336 | 137148064 | rs11790027 | 0.441 |
| 9  | 139586637 | rs950078   | 139805843 | rs10867070 | 0.215 |
| 10 | 803426    | rs11253424 | 818288    | rs11253441 | 0.919 |
| 10 | 1888716   | rs11250832 | 1892670   | rs10794794 | 0.202 |
| 10 | 1892367   | rs11250839 | 1892429   | rs4077784  | 0.525 |
| 10 | 1892367   | rs11250839 | 1892670   | rs10794794 | 0.504 |
| 10 | 1892429   | rs4077784  | 1892670   | rs10794794 | 0.980 |
| 10 | 2629732   | rs17158677 | 2635905   | rs17158687 | 0.947 |
| 10 | 2756759   | rs11251468 | 2756921   | rs11251469 | 1.000 |
| 10 | 3514893   | rs1962663  | 3572348   | rs705478   | 0.215 |
| 10 | 3514893   | rs1962663  | 3584187   | rs7911947  | 0.278 |
| 10 | 3572348   | rs705478   | 3584187   | rs7911947  | 0.233 |
| 10 | 3937069   | rs11599077 | 3942714   | rs7350412  | 0.292 |
| 10 | 3937069   | rs11599077 | 3946173   | rs4572033  | 0.450 |
| 10 | 3942714   | rs7350412  | 3946173   | rs4572033  | 0.441 |
| 10 | 4883318   | rs10795202 | 4916008   | rs7071257  | 0.679 |
| 10 | 5058113   | rs10904392 | 5103711   | rs4881394  | 0.270 |
| 10 | 6897313   | rs11254759 | 6922666   | rs11254798 | 0.347 |
| 10 | 8747207   | rs11255804 | 8771261   | rs7912831  | 0.302 |
| 10 | 9141442   | rs2760206  | 9148524   | rs17145188 | 0.482 |
| 10 | 9148524   | rs17145188 | 9244955   | rs10905523 | 0.210 |
| 10 | 9148524   | rs17145188 | 9255068   | rs11256103 | 0.207 |
| 10 | 9212297   | rs17145278 | 9244955   | rs10905523 | 0.742 |
| 10 | 9212297   | rs17145278 | 9255068   | rs11256103 | 0.737 |
| 10 | 9244955   | rs10905523 | 9255068   | rs11256103 | 1.000 |
| 10 | 9444181   | rs1762766  | 9449003   | rs2477043  | 0.987 |
| 10 | 9557144   | rs4749869  | 9557305   | rs4749871  | 1.000 |
| 10 | 11484876  | rs2440100  | 11494638  | rs2440110  | 0.753 |
| 10 | 11484876  | rs2440100  | 11505909  | rs2455596  | 0.639 |
| 10 | 11494638  | rs2440110  | 11505909  | rs2455596  | 0.458 |
| 10 | 12889254  | rs11258001 | 12889796  | rs10906228 | 0.701 |
| 10 | 13676307  | rs11258459 | 13692836  | rs7910585  | 0.514 |
| 10 | 13692836  | rs7910585  | 13724849  | rs10508463 | 0.394 |

|    |          |            |          |            |       |
|----|----------|------------|----------|------------|-------|
| 10 | 13692836 | rs7910585  | 13724911 | rs11258494 | 0.394 |
| 10 | 13692836 | rs7910585  | 13725082 | rs10508464 | 0.394 |
| 10 | 13692836 | rs7910585  | 13725194 | rs10508465 | 0.394 |
| 10 | 13692836 | rs7910585  | 13725557 | rs4626964  | 0.391 |
| 10 | 13692836 | rs7910585  | 13725772 | rs13005    | 0.394 |
| 10 | 13724849 | rs10508463 | 13724911 | rs11258494 | 1.000 |
| 10 | 13724849 | rs10508463 | 13725082 | rs10508464 | 1.000 |
| 10 | 13724849 | rs10508463 | 13725194 | rs10508465 | 1.000 |
| 10 | 13724849 | rs10508463 | 13725557 | rs4626964  | 0.983 |
| 10 | 13724849 | rs10508463 | 13725772 | rs13005    | 1.000 |
| 10 | 13724911 | rs11258494 | 13725082 | rs10508464 | 1.000 |
| 10 | 13724911 | rs11258494 | 13725194 | rs10508465 | 1.000 |
| 10 | 13724911 | rs11258494 | 13725557 | rs4626964  | 0.983 |
| 10 | 13724911 | rs11258494 | 13725772 | rs13005    | 1.000 |
| 10 | 13725082 | rs10508464 | 13725194 | rs10508465 | 1.000 |
| 10 | 13725082 | rs10508464 | 13725557 | rs4626964  | 0.983 |
| 10 | 13725082 | rs10508464 | 13725772 | rs13005    | 1.000 |
| 10 | 13725194 | rs10508465 | 13725557 | rs4626964  | 0.983 |
| 10 | 13725194 | rs10508465 | 13725772 | rs13005    | 1.000 |
| 10 | 13725557 | rs4626964  | 13725772 | rs13005    | 0.983 |
| 10 | 14158090 | rs7095572  | 14168566 | rs968273   | 0.350 |
| 10 | 16466321 | rs17138511 | 16469618 | rs7082220  | 0.451 |
| 10 | 17344934 | rs5009752  | 17370186 | rs359288   | 0.225 |
| 10 | 18491890 | rs11598236 | 18510335 | rs12413195 | 0.236 |
| 10 | 19612735 | rs2499065  | 19641830 | rs11009410 | 0.237 |
| 10 | 19612735 | rs2499065  | 19684979 | rs11009595 | 0.249 |
| 10 | 19612735 | rs2499065  | 19685245 | rs1591345  | 0.221 |
| 10 | 19641830 | rs11009410 | 19684979 | rs11009595 | 0.779 |
| 10 | 19641830 | rs11009410 | 19685245 | rs1591345  | 0.543 |
| 10 | 19684979 | rs11009595 | 19685245 | rs1591345  | 0.669 |
| 10 | 19684979 | rs11009595 | 19733181 | rs7079302  | 0.215 |
| 10 | 19685245 | rs1591345  | 19733181 | rs7079302  | 0.215 |
| 10 | 20556872 | rs7073927  | 20556984 | rs7074175  | 1.000 |
| 10 | 22381427 | rs4437938  | 22381580 | rs4266962  | 1.000 |
| 10 | 22748913 | rs11012989 | 22764104 | rs6482213  | 0.325 |
| 10 | 22748913 | rs11012989 | 22780965 | rs7914254  | 0.541 |
| 10 | 22748913 | rs11012989 | 23204056 | rs7899968  | 0.210 |
| 10 | 22764104 | rs6482213  | 22780965 | rs7914254  | 0.461 |
| 10 | 23204056 | rs7899968  | 23277574 | rs17440393 | 0.249 |
| 10 | 23277574 | rs17440393 | 23289115 | rs11013210 | 0.788 |
| 10 | 23765898 | rs2137157  | 23808903 | rs6482286  | 0.214 |
| 10 | 25821413 | rs1329255  | 25828641 | rs7072700  | 0.522 |
| 10 | 25821413 | rs1329255  | 25828674 | rs10828810 | 0.312 |
| 10 | 25828641 | rs7072700  | 25828674 | rs10828810 | 0.308 |



|    |          |            |          |            |       |
|----|----------|------------|----------|------------|-------|
| 10 | 25828641 | rs7072700  | 25917657 | rs11014632 | 0.402 |
| 10 | 25828674 | rs10828810 | 25905769 | rs4747532  | 0.257 |
| 10 | 25828674 | rs10828810 | 25909549 | rs11014625 | 0.502 |
| 10 | 25905769 | rs4747532  | 25909549 | rs11014625 | 0.685 |
| 10 | 25905769 | rs4747532  | 25917657 | rs11014632 | 0.316 |
| 10 | 27295757 | rs7896781  | 27296142 | rs11015433 | 0.255 |
| 10 | 27709661 | rs532473   | 27722150 | rs1413895  | 0.569 |
| 10 | 27709661 | rs532473   | 27722495 | rs517060   | 0.880 |
| 10 | 27722150 | rs1413895  | 27722495 | rs517060   | 0.634 |
| 10 | 29590393 | rs2211397  | 29609361 | rs2488264  | 0.254 |
| 10 | 29621792 | rs10763702 | 29626489 | rs10763704 | 0.501 |
| 10 | 29975384 | rs11007683 | 29975784 | rs17778999 | 1.000 |
| 10 | 30654280 | rs10763778 | 30680405 | rs10826786 | 0.967 |
| 10 | 30771645 | rs8176983  | 30771666 | rs8176984  | 0.982 |
| 10 | 30901965 | rs7074198  | 30902073 | rs4362058  | 1.000 |
| 10 | 34461560 | rs1692708  | 34481223 | rs1148242  | 0.694 |
| 10 | 34464515 | rs10827330 | 34513449 | rs642099   | 0.516 |
| 10 | 34481223 | rs1148242  | 34535295 | rs678188   | 0.278 |
| 10 | 34535295 | rs678188   | 34567393 | rs1111267  | 0.274 |
| 10 | 36793219 | rs3924753  | 36899882 | rs2483008  | 0.266 |
| 10 | 37599485 | rs1200820  | 37604993 | rs1200826  | 0.837 |
| 10 | 37932950 | rs10740944 | 37981342 | rs289642   | 0.421 |
| 10 | 47062190 | rs750211   | 47067457 | rs7069401  | 0.543 |
| 10 | 49646975 | rs12768835 | 49649839 | rs6537576  | 0.397 |
| 10 | 49646975 | rs12768835 | 49700029 | rs10857650 | 0.270 |
| 10 | 49646975 | rs12768835 | 49700248 | rs3747878  | 0.272 |
| 10 | 49649839 | rs6537576  | 49699711 | rs2620891  | 0.360 |
| 10 | 49649839 | rs6537576  | 49715462 | rs7922169  | 0.250 |
| 10 | 49698112 | rs12242220 | 49765425 | rs12248178 | 0.488 |
| 10 | 49699711 | rs2620891  | 49715462 | rs7922169  | 0.615 |
| 10 | 49699711 | rs2620891  | 49730508 | rs2620887  | 0.272 |
| 10 | 49699711 | rs2620891  | 49764792 | rs2671711  | 0.302 |
| 10 | 49700029 | rs10857650 | 49700248 | rs3747878  | 1.000 |
| 10 | 49700029 | rs10857650 | 49715462 | rs7922169  | 0.246 |
| 10 | 49700029 | rs10857650 | 49730508 | rs2620887  | 0.398 |
| 10 | 49700029 | rs10857650 | 49764792 | rs2671711  | 0.333 |
| 10 | 49700248 | rs3747878  | 49715462 | rs7922169  | 0.248 |
| 10 | 49700248 | rs3747878  | 49730508 | rs2620887  | 0.400 |
| 10 | 49700248 | rs3747878  | 49764792 | rs2671711  | 0.335 |
| 10 | 49715462 | rs7922169  | 49730508 | rs2620887  | 0.242 |
| 10 | 49715462 | rs7922169  | 49764792 | rs2671711  | 0.254 |
| 10 | 49715462 | rs7922169  | 49765425 | rs12248178 | 0.250 |
| 10 | 49730508 | rs2620887  | 49764792 | rs2671711  | 0.814 |
| 10 | 52405002 | rs7076364  | 52437180 | rs10995339 | 0.739 |

|    |          |            |          |            |       |
|----|----------|------------|----------|------------|-------|
| 10 | 52405002 | rs7076364  | 52444923 | rs10822095 | 0.731 |
| 10 | 52422379 | rs2816836  | 52422640 | rs2816835  | 1.000 |
| 10 | 52422379 | rs2816836  | 52444054 | rs7895755  | 0.632 |
| 10 | 52422379 | rs2816836  | 52498177 | rs10761774 | 0.323 |
| 10 | 52422640 | rs2816835  | 52444054 | rs7895755  | 0.632 |
| 10 | 52422640 | rs2816835  | 52498177 | rs10761774 | 0.323 |
| 10 | 52437180 | rs10995339 | 52444923 | rs10822095 | 0.989 |
| 10 | 52444054 | rs7895755  | 52498177 | rs10761774 | 0.500 |
| 10 | 52498177 | rs10761774 | 52544506 | rs9299465  | 0.468 |
| 10 | 52833546 | rs17529748 | 52870282 | rs17531066 | 0.956 |
| 10 | 52919580 | rs10508944 | 52932639 | rs1952138  | 0.968 |
| 10 | 54395856 | rs7916982  | 54426191 | rs7915769  | 0.293 |
| 10 | 54566822 | rs6480996  | 54567756 | rs2384124  | 1.000 |
| 10 | 56106514 | rs6481116  | 56143760 | rs10825383 | 0.362 |
| 10 | 56142441 | rs11004466 | 56143760 | rs10825383 | 0.266 |
| 10 | 56142441 | rs11004466 | 56144916 | rs11004473 | 1.000 |
| 10 | 56142441 | rs11004466 | 56162216 | rs11004515 | 1.000 |
| 10 | 56143760 | rs10825383 | 56144916 | rs11004473 | 0.266 |
| 10 | 56143760 | rs10825383 | 56162216 | rs11004515 | 0.266 |
| 10 | 56144916 | rs11004473 | 56162216 | rs11004515 | 1.000 |
| 10 | 57390788 | rs7897632  | 57391103 | rs2131967  | 0.644 |
| 10 | 57390788 | rs7897632  | 57391411 | rs2172738  | 0.668 |
| 10 | 57390788 | rs7897632  | 57391868 | rs10825680 | 0.454 |
| 10 | 57390788 | rs7897632  | 57424570 | rs10763287 | 0.436 |
| 10 | 57390788 | rs7897632  | 57448762 | rs4384321  | 0.403 |
| 10 | 57390788 | rs7897632  | 57448789 | rs4384322  | 0.387 |
| 10 | 57391103 | rs2131967  | 57391411 | rs2172738  | 0.956 |
| 10 | 57391103 | rs2131967  | 57391868 | rs10825680 | 0.624 |
| 10 | 57391103 | rs2131967  | 57424570 | rs10763287 | 0.445 |
| 10 | 57391103 | rs2131967  | 57448762 | rs4384321  | 0.419 |
| 10 | 57391103 | rs2131967  | 57448789 | rs4384322  | 0.426 |
| 10 | 57391411 | rs2172738  | 57391868 | rs10825680 | 0.669 |
| 10 | 57391411 | rs2172738  | 57424570 | rs10763287 | 0.468 |
| 10 | 57391411 | rs2172738  | 57448762 | rs4384321  | 0.443 |
| 10 | 57391411 | rs2172738  | 57448789 | rs4384322  | 0.436 |
| 10 | 57391868 | rs10825680 | 57424570 | rs10763287 | 0.720 |
| 10 | 57391868 | rs10825680 | 57448762 | rs4384321  | 0.707 |
| 10 | 57391868 | rs10825680 | 57448789 | rs4384322  | 0.695 |
| 10 | 57424570 | rs10763287 | 57448762 | rs4384321  | 0.951 |
| 10 | 57424570 | rs10763287 | 57448789 | rs4384322  | 0.943 |
| 10 | 57448762 | rs4384321  | 57448789 | rs4384322  | 0.990 |
| 10 | 58057613 | rs12098738 | 58340522 | rs2818836  | 0.269 |
| 10 | 58057613 | rs12098738 | 58380039 | rs11817479 | 0.344 |
| 10 | 58340522 | rs2818836  | 58380039 | rs11817479 | 0.407 |

|    |          |            |          |            |       |
|----|----------|------------|----------|------------|-------|
| 10 | 60809191 | rs7069283  | 60811072 | rs7903343  | 0.947 |
| 10 | 61224012 | rs2271564  | 61364310 | rs1664278  | 0.327 |
| 10 | 64343487 | rs10740095 | 64421047 | rs4746783  | 0.328 |
| 10 | 64594223 | rs11817689 | 64813564 | rs9415699  | 1.000 |
| 10 | 64915681 | rs16918507 | 64985492 | rs6479906  | 0.249 |
| 10 | 66648119 | rs9414877  | 66676003 | rs10996304 | 0.584 |
| 10 | 66676003 | rs10996304 | 66681694 | rs7906982  | 0.406 |
| 10 | 66676003 | rs10996304 | 66689678 | rs9415814  | 0.304 |
| 10 | 66681694 | rs7906982  | 66689678 | rs9415814  | 0.659 |
| 10 | 67337138 | rs1670159  | 67359195 | rs1786923  | 0.335 |
| 10 | 68786426 | rs9415871  | 68848215 | rs10740277 | 0.630 |
| 10 | 69591909 | rs10997963 | 69605065 | rs7097776  | 0.271 |
| 10 | 69591909 | rs10997963 | 69629843 | rs4746738  | 0.370 |
| 10 | 69605065 | rs7097776  | 69629843 | rs4746738  | 0.578 |
| 10 | 69883970 | rs10998184 | 69884059 | rs10998185 | 0.359 |
| 10 | 69883970 | rs10998184 | 69939971 | rs2457458  | 0.372 |
| 10 | 72958955 | rs7911202  | 72966441 | rs4747164  | 0.287 |
| 10 | 73126384 | rs7094357  | 73127923 | rs10999960 | 0.788 |
| 10 | 74438930 | rs12253630 | 74677594 | rs16930466 | 0.541 |
| 10 | 80764708 | rs16937080 | 80771685 | rs2105461  | 0.223 |
| 10 | 80764708 | rs16937080 | 80773868 | rs1892498  | 0.224 |
| 10 | 80764708 | rs16937080 | 80775690 | rs4246944  | 0.228 |
| 10 | 80771685 | rs2105461  | 80773868 | rs1892498  | 0.973 |
| 10 | 80771685 | rs2105461  | 80775690 | rs4246944  | 0.605 |
| 10 | 80773868 | rs1892498  | 80775690 | rs4246944  | 0.590 |
| 10 | 81779567 | rs11201269 | 81801652 | rs4478933  | 0.253 |
| 10 | 84714402 | rs17761683 | 84773295 | rs11196923 | 1.000 |
| 10 | 85720683 | rs11200762 | 85720790 | rs11200763 | 1.000 |
| 10 | 85720683 | rs11200762 | 85749135 | rs7909859  | 0.353 |
| 10 | 85720790 | rs11200763 | 85749135 | rs7909859  | 0.353 |
| 10 | 87478860 | rs7924009  | 87507487 | rs2949380  | 0.929 |
| 10 | 91382747 | rs12771413 | 91384059 | rs11330    | 0.970 |
| 10 | 91599612 | rs12251257 | 91602036 | rs10881695 | 0.555 |
| 10 | 93756295 | rs11186792 | 93824133 | rs2185834  | 0.750 |
| 10 | 97056288 | rs10786198 | 97061507 | rs3814150  | 0.254 |
| 10 | 98546775 | rs6584099  | 98693207 | rs7080839  | 0.747 |
| 10 | 98546775 | rs6584099  | 98737104 | rs4606419  | 0.570 |
| 10 | 98693207 | rs7080839  | 98737104 | rs4606419  | 0.782 |
| 10 | 99677879 | rs4917792  | 99681340 | rs4919164  | 0.891 |
| 10 | 99878119 | rs1413618  | 99878333 | rs928579   | 1.000 |
| 10 | 99878119 | rs1413618  | 99989333 | rs10748721 | 0.966 |
| 10 | 99878119 | rs1413618  | 99994896 | rs3750595  | 0.991 |
| 10 | 99878333 | rs928579   | 99989333 | rs10748721 | 0.966 |
| 10 | 99878333 | rs928579   | 99994896 | rs3750595  | 0.991 |

|    |           |            |           |            |       |
|----|-----------|------------|-----------|------------|-------|
| 10 | 99989333  | rs10748721 | 99994896  | rs3750595  | 0.974 |
| 10 | 100717696 | rs11189910 | 100748309 | rs7924025  | 0.314 |
| 10 | 100717696 | rs11189910 | 100862771 | rs1342580  | 0.384 |
| 10 | 100717696 | rs11189910 | 100967599 | rs10883299 | 0.347 |
| 10 | 100862771 | rs1342580  | 100967599 | rs10883299 | 0.885 |
| 10 | 100873537 | rs1954295  | 101047389 | rs7899146  | 0.763 |
| 10 | 100873537 | rs1954295  | 101094702 | rs10786538 | 0.768 |
| 10 | 101047389 | rs7899146  | 101094702 | rs10786538 | 0.774 |
| 10 | 102422700 | rs11190643 | 102445505 | rs10786601 | 0.377 |
| 10 | 102422700 | rs11190643 | 102458016 | rs7082923  | 0.201 |
| 10 | 102445505 | rs10786601 | 102458016 | rs7082923  | 0.303 |
| 10 | 103998741 | rs4244350  | 104026345 | rs812799   | 0.901 |
| 10 | 103998741 | rs4244350  | 104026439 | rs772021   | 0.966 |
| 10 | 104026345 | rs812799   | 104026439 | rs772021   | 0.911 |
| 10 | 104585410 | rs3781287  | 104820809 | rs10883826 | 0.598 |
| 10 | 106043631 | rs156699   | 106060991 | rs10491046 | 0.528 |
| 10 | 106043631 | rs156699   | 106067576 | rs10883991 | 0.480 |
| 10 | 106043631 | rs156699   | 106079416 | rs11192008 | 0.383 |
| 10 | 106043631 | rs156699   | 106080777 | rs276214   | 0.202 |
| 10 | 106060991 | rs10491046 | 106067576 | rs10883991 | 0.687 |
| 10 | 106060991 | rs10491046 | 106079416 | rs11192008 | 0.512 |
| 10 | 106067576 | rs10883991 | 106079416 | rs11192008 | 0.529 |
| 10 | 106862575 | rs11192321 | 106887944 | rs10884103 | 0.811 |
| 10 | 107908905 | rs11192739 | 107938899 | rs10884268 | 0.788 |
| 10 | 108342175 | rs17121023 | 108354299 | rs11817663 | 0.268 |
| 10 | 108432009 | rs821925   | 108445133 | rs821958   | 0.753 |
| 10 | 108918548 | rs7099998  | 108918701 | rs7082331  | 1.000 |
| 10 | 108918548 | rs7099998  | 108918890 | rs10884426 | 1.000 |
| 10 | 108918701 | rs7082331  | 108918890 | rs10884426 | 1.000 |
| 10 | 109571175 | rs17227554 | 109571479 | rs17325365 | 0.991 |
| 10 | 110366810 | rs1332260  | 110384900 | rs12412977 | 0.595 |
| 10 | 110970055 | rs10884712 | 110994544 | rs3888122  | 0.523 |
| 10 | 110970055 | rs10884712 | 110998503 | rs11194511 | 0.348 |
| 10 | 110970055 | rs10884712 | 111021967 | rs830062   | 0.505 |
| 10 | 110970055 | rs10884712 | 111103117 | rs7920353  | 0.303 |
| 10 | 110994544 | rs3888122  | 110998503 | rs11194511 | 0.427 |
| 10 | 110994544 | rs3888122  | 111021967 | rs830062   | 0.961 |
| 10 | 110994544 | rs3888122  | 111084275 | rs11194562 | 0.233 |
| 10 | 110998503 | rs11194511 | 111021967 | rs830062   | 0.391 |
| 10 | 111021967 | rs830062   | 111084275 | rs11194562 | 0.232 |
| 10 | 111084275 | rs11194562 | 111103117 | rs7920353  | 0.461 |
| 10 | 111620721 | rs612155   | 111648324 | rs944966   | 0.229 |
| 10 | 111648324 | rs944966   | 111699868 | rs12768489 | 0.582 |
| 10 | 112121472 | rs10884954 | 112144100 | rs4918508  | 0.293 |

|    |           |            |           |            |       |
|----|-----------|------------|-----------|------------|-------|
| 10 | 113026683 | rs10509936 | 113030534 | rs10749065 | 0.472 |
| 10 | 113520074 | rs10885262 | 113547792 | rs11195730 | 0.668 |
| 10 | 114065189 | rs1887136  | 114092662 | rs7087000  | 0.366 |
| 10 | 114065189 | rs1887136  | 114182275 | rs2306158  | 0.268 |
| 10 | 114092662 | rs7087000  | 114182275 | rs2306158  | 0.507 |
| 10 | 114332265 | rs12268627 | 114332350 | rs12254159 | 0.890 |
| 10 | 114757761 | rs4132670  | 114778805 | rs12243326 | 0.409 |
| 10 | 116876309 | rs11197072 | 117214465 | rs17093112 | 0.297 |
| 10 | 116876309 | rs11197072 | 117417474 | rs12219110 | 0.308 |
| 10 | 117214465 | rs17093112 | 117417474 | rs12219110 | 0.764 |
| 10 | 118638831 | rs3781566  | 118808539 | rs7094283  | 0.354 |
| 10 | 118638831 | rs3781566  | 118819674 | rs10787753 | 0.536 |
| 10 | 118808539 | rs7094283  | 118819674 | rs10787753 | 0.779 |
| 10 | 118949003 | rs3847483  | 118963135 | rs3858335  | 0.837 |
| 10 | 118949003 | rs3847483  | 118963546 | rs17095891 | 0.837 |
| 10 | 118963135 | rs3858335  | 118963546 | rs17095891 | 1.000 |
| 10 | 122706857 | rs10788134 | 122712496 | rs17510577 | 0.398 |
| 10 | 122993625 | rs7899480  | 122993679 | rs7899611  | 0.990 |
| 10 | 123573965 | rs3862129  | 123666737 | rs11200257 | 0.949 |
| 10 | 123573965 | rs3862129  | 123693800 | rs11200277 | 0.905 |
| 10 | 123573965 | rs3862129  | 123697712 | rs7906271  | 0.880 |
| 10 | 123573965 | rs3862129  | 123705392 | rs10887032 | 0.914 |
| 10 | 123666737 | rs11200257 | 123693800 | rs11200277 | 0.962 |
| 10 | 123666737 | rs11200257 | 123697712 | rs7906271  | 0.931 |
| 10 | 123666737 | rs11200257 | 123705392 | rs10887032 | 0.965 |
| 10 | 123693800 | rs11200277 | 123697712 | rs7906271  | 0.961 |
| 10 | 123693800 | rs11200277 | 123705392 | rs10887032 | 1.000 |
| 10 | 123697712 | rs7906271  | 123705392 | rs10887032 | 0.965 |
| 10 | 124019426 | rs1885512  | 124214077 | rs11200640 | 0.227 |
| 10 | 125074629 | rs913524   | 125088556 | rs6599688  | 0.991 |
| 10 | 125074629 | rs913524   | 125104041 | rs1887821  | 0.611 |
| 10 | 125088556 | rs6599688  | 125104041 | rs1887821  | 0.620 |
| 10 | 127400272 | rs9804381  | 127409227 | rs6597725  | 1.000 |
| 10 | 129218811 | rs1931744  | 129240631 | rs4080381  | 0.300 |
| 10 | 129582283 | rs2148895  | 129636049 | rs11018411 | 0.318 |
| 10 | 130034129 | rs10829385 | 130057287 | rs7923707  | 0.251 |
| 10 | 131881171 | rs16910188 | 131897272 | rs1410906  | 0.285 |
| 10 | 132068996 | rs431131   | 132071257 | rs411620   | 0.429 |
| 10 | 132069411 | rs7084067  | 132071257 | rs411620   | 0.512 |
| 10 | 132118628 | rs880832   | 132165808 | rs11017270 | 0.693 |
| 10 | 132118628 | rs880832   | 132173058 | rs402807   | 0.476 |
| 10 | 132118628 | rs880832   | 132177561 | rs426715   | 0.493 |
| 10 | 132118628 | rs880832   | 132205806 | rs4751217  | 0.522 |
| 10 | 132118628 | rs880832   | 132206587 | rs6482809  | 0.489 |

|    |           |            |           |            |       |
|----|-----------|------------|-----------|------------|-------|
| 10 | 132160832 | rs400803   | 132160885 | rs431690   | 1.000 |
| 10 | 132160832 | rs400803   | 132187763 | rs10764960 | 0.287 |
| 10 | 132160885 | rs431690   | 132187763 | rs10764960 | 0.287 |
| 10 | 132165808 | rs11017270 | 132173058 | rs402807   | 0.738 |
| 10 | 132165808 | rs11017270 | 132177561 | rs426715   | 0.691 |
| 10 | 132165808 | rs11017270 | 132205806 | rs4751217  | 0.755 |
| 10 | 132165808 | rs11017270 | 132206587 | rs6482809  | 0.737 |
| 10 | 132173058 | rs402807   | 132177561 | rs426715   | 0.966 |
| 10 | 132173058 | rs402807   | 132205806 | rs4751217  | 0.866 |
| 10 | 132173058 | rs402807   | 132206587 | rs6482809  | 0.858 |
| 10 | 132177561 | rs426715   | 132205806 | rs4751217  | 0.897 |
| 10 | 132177561 | rs426715   | 132206587 | rs6482809  | 0.891 |
| 10 | 132205806 | rs4751217  | 132206587 | rs6482809  | 1.000 |
| 10 | 132611226 | rs7074195  | 132661360 | rs11017622 | 0.265 |
| 10 | 132611226 | rs7074195  | 132661446 | rs11017623 | 0.265 |
| 10 | 132628747 | rs2397738  | 132630798 | rs892322   | 0.981 |
| 10 | 132628747 | rs2397738  | 132641908 | rs10829854 | 0.962 |
| 10 | 132628747 | rs2397738  | 132661360 | rs11017622 | 0.254 |
| 10 | 132628747 | rs2397738  | 132661446 | rs11017623 | 0.254 |
| 10 | 132630798 | rs892322   | 132641908 | rs10829854 | 0.981 |
| 10 | 132630798 | rs892322   | 132661360 | rs11017622 | 0.256 |
| 10 | 132630798 | rs892322   | 132661446 | rs11017623 | 0.256 |
| 10 | 132641908 | rs10829854 | 132661360 | rs11017622 | 0.259 |
| 10 | 132641908 | rs10829854 | 132661446 | rs11017623 | 0.259 |
| 10 | 132661360 | rs11017622 | 132661446 | rs11017623 | 1.000 |
| 10 | 133250389 | rs10765092 | 133251032 | rs7074167  | 0.991 |
| 11 | 2483882   | rs179409   | 2486738   | rs2237866  | 0.292 |
| 11 | 3648225   | rs2672215  | 3648600   | rs2672216  | 0.729 |
| 11 | 5072704   | rs12282135 | 5073531   | rs11035648 | 0.467 |
| 11 | 5145420   | rs10734485 | 5145512   | rs10742553 | 0.873 |
| 11 | 5145420   | rs10734485 | 5166168   | rs11602279 | 0.481 |
| 11 | 5145512   | rs10742553 | 5166168   | rs11602279 | 0.481 |
| 11 | 6716101   | rs2067022  | 6749489   | rs7947196  | 0.207 |
| 11 | 6716101   | rs2067022  | 6749646   | rs10839617 | 0.209 |
| 11 | 6749489   | rs7947196  | 6749646   | rs10839617 | 1.000 |
| 11 | 6826194   | rs10839628 | 6840789   | rs2741774  | 0.338 |
| 11 | 7214147   | rs766497   | 7403545   | rs10839781 | 0.259 |
| 11 | 9031596   | rs3763904  | 9038237   | rs7127387  | 0.849 |
| 11 | 9706221   | rs397686   | 9755312   | rs7120754  | 0.288 |
| 11 | 9755312   | rs7120754  | 9857034   | rs1546542  | 0.223 |
| 11 | 10986547  | rs1386152  | 11002835  | rs10500737 | 0.218 |
| 11 | 12330256  | rs16911154 | 12330765  | rs16911159 | 0.945 |
| 11 | 13053050  | rs10500770 | 13056122  | rs2165484  | 0.284 |
| 11 | 13053050  | rs10500770 | 13057878  | rs11022636 | 0.284 |

|    |          |            |          |            |       |
|----|----------|------------|----------|------------|-------|
| 11 | 13053050 | rs10500770 | 13059500 | rs2583136  | 0.205 |
| 11 | 13056122 | rs2165484  | 13057878 | rs11022636 | 1.000 |
| 11 | 13056122 | rs2165484  | 13059500 | rs2583136  | 0.740 |
| 11 | 13056122 | rs2165484  | 13081100 | rs3849154  | 0.385 |
| 11 | 13057878 | rs11022636 | 13059500 | rs2583136  | 0.740 |
| 11 | 13057878 | rs11022636 | 13081100 | rs3849154  | 0.385 |
| 11 | 13059500 | rs2583136  | 13081100 | rs3849154  | 0.482 |
| 11 | 13435415 | rs2593579  | 13530459 | rs10500785 | 0.906 |
| 11 | 13435415 | rs2593579  | 13578990 | rs11022899 | 0.724 |
| 11 | 13435415 | rs2593579  | 13581879 | rs10832081 | 0.852 |
| 11 | 13530459 | rs10500785 | 13578990 | rs11022899 | 0.761 |
| 11 | 13530459 | rs10500785 | 13581879 | rs10832081 | 0.943 |
| 11 | 13578990 | rs11022899 | 13581879 | rs10832081 | 0.810 |
| 11 | 13616373 | rs12420514 | 13625777 | rs12786409 | 0.845 |
| 11 | 14029178 | rs11821106 | 14034447 | rs7131289  | 0.677 |
| 11 | 15475924 | rs10832454 | 15516762 | rs2351097  | 0.877 |
| 11 | 16346170 | rs297325   | 16389040 | rs12221729 | 0.797 |
| 11 | 16346170 | rs297325   | 16441827 | rs10500830 | 0.832 |
| 11 | 16346170 | rs297325   | 16626773 | rs4756858  | 0.623 |
| 11 | 16365152 | rs1847315  | 16394987 | rs7932807  | 0.931 |
| 11 | 16389040 | rs12221729 | 16441827 | rs10500830 | 0.745 |
| 11 | 16389040 | rs12221729 | 16626773 | rs4756858  | 0.571 |
| 11 | 16441827 | rs10500830 | 16626773 | rs4756858  | 0.756 |
| 11 | 16926330 | rs10766360 | 16931362 | rs2883150  | 0.912 |
| 11 | 16982316 | rs4757484  | 16984904 | rs7947297  | 0.990 |
| 11 | 16982316 | rs4757484  | 16985321 | rs7933984  | 0.990 |
| 11 | 16984904 | rs7947297  | 16985321 | rs7933984  | 1.000 |
| 11 | 18134918 | rs2445206  | 18153416 | rs10832896 | 0.210 |
| 11 | 18134918 | rs2445206  | 18156255 | rs2468772  | 0.937 |
| 11 | 18135024 | rs11024502 | 18153416 | rs10832896 | 0.590 |
| 11 | 18153416 | rs10832896 | 18156255 | rs2468772  | 0.221 |
| 11 | 19584103 | rs10833134 | 19644968 | rs12574517 | 0.616 |
| 11 | 19584103 | rs10833134 | 19647564 | rs7927862  | 0.535 |
| 11 | 19644968 | rs12574517 | 19647564 | rs7927862  | 0.879 |
| 11 | 21807233 | rs16908613 | 21818153 | rs1009809  | 0.969 |
| 11 | 21981697 | rs428209   | 21982053 | rs1379649  | 1.000 |
| 11 | 21981697 | rs428209   | 22056773 | rs10766916 | 0.443 |
| 11 | 21982053 | rs1379649  | 22056773 | rs10766916 | 0.447 |
| 11 | 22840459 | rs12278342 | 22863000 | rs2429772  | 0.614 |
| 11 | 22840459 | rs12278342 | 22875997 | rs2429752  | 0.616 |
| 11 | 22840459 | rs12278342 | 22957547 | rs2403793  | 0.465 |
| 11 | 22863000 | rs2429772  | 22875997 | rs2429752  | 0.962 |
| 11 | 22863000 | rs2429772  | 22957547 | rs2403793  | 0.618 |
| 11 | 22875997 | rs2429752  | 22957547 | rs2403793  | 0.645 |

|    |          |            |          |            |       |
|----|----------|------------|----------|------------|-------|
| 11 | 23169551 | rs7112339  | 23180811 | rs1600957  | 0.710 |
| 11 | 23169551 | rs7112339  | 23192822 | rs1482735  | 0.907 |
| 11 | 23180811 | rs1600957  | 23192822 | rs1482735  | 0.708 |
| 11 | 24734687 | rs2716548  | 24758224 | rs1486698  | 0.310 |
| 11 | 25045288 | rs1838773  | 25109057 | rs2404026  | 0.268 |
| 11 | 25070842 | rs11028415 | 25109057 | rs2404026  | 0.240 |
| 11 | 25143560 | rs10742069 | 25143952 | rs7107300  | 0.374 |
| 11 | 25714362 | rs11028885 | 25747721 | rs1389421  | 0.295 |
| 11 | 25840913 | rs17242747 | 25910098 | rs16914910 | 0.639 |
| 11 | 25862285 | rs7943568  | 25909353 | rs10834856 | 0.456 |
| 11 | 25862285 | rs7943568  | 25909416 | rs1441486  | 0.452 |
| 11 | 25909353 | rs10834856 | 25909416 | rs1441486  | 0.992 |
| 11 | 27151203 | rs920698   | 27154937 | rs7938462  | 0.201 |
| 11 | 32565979 | rs201879   | 32595768 | rs201905   | 0.892 |
| 11 | 32565979 | rs201879   | 32676726 | rs11031940 | 0.563 |
| 11 | 32565979 | rs201879   | 32680449 | rs1486582  | 0.729 |
| 11 | 32565979 | rs201879   | 32730565 | rs9943472  | 0.763 |
| 11 | 32565979 | rs201879   | 32779010 | rs7102857  | 0.665 |
| 11 | 32595768 | rs201905   | 32676726 | rs11031940 | 0.627 |
| 11 | 32595768 | rs201905   | 32680449 | rs1486582  | 0.826 |
| 11 | 32595768 | rs201905   | 32730565 | rs9943472  | 0.812 |
| 11 | 32595768 | rs201905   | 32779010 | rs7102857  | 0.758 |
| 11 | 32676726 | rs11031940 | 32680449 | rs1486582  | 0.706 |
| 11 | 32676726 | rs11031940 | 32730565 | rs9943472  | 0.716 |
| 11 | 32676726 | rs11031940 | 32779010 | rs7102857  | 0.638 |
| 11 | 32680449 | rs1486582  | 32730565 | rs9943472  | 0.983 |
| 11 | 32680449 | rs1486582  | 32779010 | rs7102857  | 0.922 |
| 11 | 32730565 | rs9943472  | 32779010 | rs7102857  | 0.907 |
| 11 | 33727790 | rs1402953  | 33757109 | rs11032380 | 0.856 |
| 11 | 35219600 | rs7122374  | 35266112 | rs41352148 | 0.289 |
| 11 | 35345354 | rs11033099 | 35348844 | rs7116961  | 0.951 |
| 11 | 35481696 | rs601295   | 35482454 | rs597762   | 1.000 |
| 11 | 40209482 | rs1452475  | 40241419 | rs10734480 | 0.558 |
| 11 | 40542692 | rs1353354  | 40542978 | rs10837436 | 0.933 |
| 11 | 40542692 | rs1353354  | 40543235 | rs11035930 | 0.808 |
| 11 | 40542978 | rs10837436 | 40543235 | rs11035930 | 0.882 |
| 11 | 41000401 | rs10742570 | 41014153 | rs4631866  | 0.244 |
| 11 | 42285325 | rs11036825 | 42302576 | rs4424659  | 0.903 |
| 11 | 42285325 | rs11036825 | 42307623 | rs10768795 | 0.319 |
| 11 | 42302576 | rs4424659  | 42307623 | rs10768795 | 0.314 |
| 11 | 44124572 | rs4755782  | 44167215 | rs1390073  | 0.957 |
| 11 | 45217918 | rs2863172  | 45224291 | rs4755941  | 0.851 |
| 11 | 45217918 | rs2863172  | 45233558 | rs6416130  | 0.690 |
| 11 | 45217918 | rs2863172  | 45236863 | rs4237652  | 0.688 |



|    |          |            |          |            |       |
|----|----------|------------|----------|------------|-------|
| 11 | 45224291 | rs4755941  | 45233558 | rs6416130  | 0.799 |
| 11 | 45224291 | rs4755941  | 45236863 | rs4237652  | 0.798 |
| 11 | 45233558 | rs6416130  | 45236863 | rs4237652  | 1.000 |
| 11 | 45830024 | rs2037311  | 45835452 | rs9300053  | 0.484 |
| 11 | 45830024 | rs2037311  | 45856538 | rs12281674 | 0.909 |
| 11 | 45835452 | rs9300053  | 45856538 | rs12281674 | 0.532 |
| 11 | 45931219 | rs1996573  | 46029113 | rs11038752 | 0.355 |
| 11 | 48229272 | rs1503168  | 48960517 | rs1847639  | 0.448 |
| 11 | 48586010 | rs12365014 | 48960517 | rs1847639  | 0.330 |
| 11 | 49154124 | rs17815807 | 49283110 | rs3960835  | 0.933 |
| 11 | 49154124 | rs17815807 | 50103012 | rs17489472 | 0.583 |
| 11 | 49283110 | rs3960835  | 50103012 | rs17489472 | 0.627 |
| 11 | 54954489 | rs1364762  | 55017848 | rs17494536 | 0.957 |
| 11 | 54954489 | rs1364762  | 55025431 | rs7115527  | 0.912 |
| 11 | 54954489 | rs1364762  | 55033178 | rs9666744  | 0.674 |
| 11 | 54954489 | rs1364762  | 55054138 | rs11828054 | 0.674 |
| 11 | 54954489 | rs1364762  | 55060775 | rs17580694 | 0.674 |
| 11 | 54954489 | rs1364762  | 55423089 | rs12098903 | 0.779 |
| 11 | 55017848 | rs17494536 | 55025431 | rs7115527  | 0.954 |
| 11 | 55017848 | rs17494536 | 55033178 | rs9666744  | 0.707 |
| 11 | 55017848 | rs17494536 | 55054138 | rs11828054 | 0.707 |
| 11 | 55017848 | rs17494536 | 55060775 | rs17580694 | 0.707 |
| 11 | 55017848 | rs17494536 | 55423089 | rs12098903 | 0.815 |
| 11 | 55017848 | rs17494536 | 55434921 | rs17596143 | 0.815 |
| 11 | 55025431 | rs7115527  | 55033178 | rs9666744  | 0.668 |
| 11 | 55025431 | rs7115527  | 55054138 | rs11828054 | 0.668 |
| 11 | 55025431 | rs7115527  | 55060775 | rs17580694 | 0.668 |
| 11 | 55025431 | rs7115527  | 55423089 | rs12098903 | 0.789 |
| 11 | 55025431 | rs7115527  | 55434921 | rs17596143 | 0.789 |
| 11 | 55033178 | rs9666744  | 55054138 | rs11828054 | 1.000 |
| 11 | 55033178 | rs9666744  | 55060775 | rs17580694 | 1.000 |
| 11 | 55033178 | rs9666744  | 55423089 | rs12098903 | 0.567 |
| 11 | 55033178 | rs9666744  | 55434921 | rs17596143 | 0.567 |
| 11 | 55033178 | rs9666744  | 55465391 | rs17598094 | 0.528 |
| 11 | 55054138 | rs11828054 | 55060775 | rs17580694 | 1.000 |
| 11 | 55054138 | rs11828054 | 55423089 | rs12098903 | 0.567 |
| 11 | 55054138 | rs11828054 | 55434921 | rs17596143 | 0.567 |
| 11 | 55054138 | rs11828054 | 55465391 | rs17598094 | 0.528 |
| 11 | 55054138 | rs11828054 | 55605691 | rs17602278 | 0.510 |
| 11 | 55060775 | rs17580694 | 55423089 | rs12098903 | 0.567 |
| 11 | 55060775 | rs17580694 | 55434921 | rs17596143 | 0.567 |
| 11 | 55060775 | rs17580694 | 55465391 | rs17598094 | 0.528 |
| 11 | 55060775 | rs17580694 | 55605691 | rs17602278 | 0.510 |
| 11 | 55060775 | rs17580694 | 55605732 | rs17530228 | 0.510 |

|    |          |            |          |            |       |
|----|----------|------------|----------|------------|-------|
| 11 | 55423089 | rs12098903 | 55434921 | rs17596143 | 1.000 |
| 11 | 55423089 | rs12098903 | 55465391 | rs17598094 | 0.939 |
| 11 | 55423089 | rs12098903 | 55605691 | rs17602278 | 0.911 |
| 11 | 55423089 | rs12098903 | 55605732 | rs17530228 | 0.911 |
| 11 | 55423089 | rs12098903 | 55607598 | rs17530318 | 0.911 |
| 11 | 55423089 | rs12098903 | 55616001 | rs7943453  | 0.860 |
| 11 | 55434921 | rs17596143 | 55465391 | rs17598094 | 0.939 |
| 11 | 55434921 | rs17596143 | 55605691 | rs17602278 | 0.911 |
| 11 | 55434921 | rs17596143 | 55605732 | rs17530228 | 0.911 |
| 11 | 55434921 | rs17596143 | 55607598 | rs17530318 | 0.911 |
| 11 | 55434921 | rs17596143 | 55616001 | rs7943453  | 0.860 |
| 11 | 55439287 | rs17148897 | 55905598 | rs10750820 | 0.923 |
| 11 | 55439287 | rs17148897 | 56298572 | rs11228775 | 0.256 |
| 11 | 55465391 | rs17598094 | 55605691 | rs17602278 | 0.970 |
| 11 | 55465391 | rs17598094 | 55605732 | rs17530228 | 0.970 |
| 11 | 55465391 | rs17598094 | 55607598 | rs17530318 | 0.970 |
| 11 | 55465391 | rs17598094 | 55616001 | rs7943453  | 0.931 |
| 11 | 55605691 | rs17602278 | 55605732 | rs17530228 | 1.000 |
| 11 | 55605691 | rs17602278 | 55607598 | rs17530318 | 1.000 |
| 11 | 55605691 | rs17602278 | 55616001 | rs7943453  | 0.968 |
| 11 | 55605732 | rs17530228 | 55607598 | rs17530318 | 1.000 |
| 11 | 55605732 | rs17530228 | 55616001 | rs7943453  | 0.968 |
| 11 | 55607598 | rs17530318 | 55616001 | rs7943453  | 0.968 |
| 11 | 55905598 | rs10750820 | 56298572 | rs11228775 | 0.336 |
| 11 | 56438326 | rs12272961 | 56440326 | rs1793426  | 0.979 |
| 11 | 56713092 | rs2903267  | 56713994 | rs1943489  | 1.000 |
| 11 | 57812866 | rs4127345  | 57885744 | rs4529896  | 0.787 |
| 11 | 60120537 | rs11230420 | 60140043 | rs12280505 | 0.838 |
| 11 | 60340498 | rs2957229  | 60342231 | rs565679   | 0.983 |
| 11 | 60340498 | rs2957229  | 60342652 | rs593315   | 0.983 |
| 11 | 60340498 | rs2957229  | 60352415 | rs10897118 | 0.647 |
| 11 | 60342231 | rs565679   | 60342652 | rs593315   | 0.965 |
| 11 | 60342231 | rs565679   | 60352415 | rs10897118 | 0.612 |
| 11 | 60342652 | rs593315   | 60352415 | rs10897118 | 0.637 |
| 11 | 64596273 | rs907629   | 64605528 | rs508375   | 0.490 |
| 11 | 70717451 | rs17433007 | 70729463 | rs10897995 | 0.371 |
| 11 | 70717451 | rs17433007 | 71578612 | rs2071010  | 0.444 |
| 11 | 71303737 | rs7113974  | 71515856 | rs7109653  | 0.273 |
| 11 | 71420383 | rs1939243  | 71425794 | rs4945426  | 1.000 |
| 11 | 71420383 | rs1939243  | 71515856 | rs7109653  | 0.211 |
| 11 | 75124598 | rs683941   | 75124632 | rs684004   | 0.634 |
| 11 | 75177100 | rs1017713  | 75220909 | rs12278224 | 0.475 |
| 11 | 75820667 | rs10793164 | 75934863 | rs3753051  | 0.274 |
| 11 | 76747452 | rs876319   | 76795565 | rs2725834  | 0.778 |

|    |          |            |          |            |       |
|----|----------|------------|----------|------------|-------|
| 11 | 77024533 | rs7925252  | 77255512 | rs603462   | 0.206 |
| 11 | 77954925 | rs10751296 | 77962381 | rs4457782  | 1.000 |
| 11 | 78766903 | rs472870   | 78779722 | rs580331   | 0.698 |
| 11 | 78766903 | rs472870   | 78805883 | rs11237826 | 0.318 |
| 11 | 78779722 | rs580331   | 78805883 | rs11237826 | 0.390 |
| 11 | 78905159 | rs11237878 | 78917149 | rs11237887 | 1.000 |
| 11 | 79366452 | rs642770   | 79401323 | rs6592876  | 0.232 |
| 11 | 79777451 | rs2448269  | 79777810 | rs7112033  | 0.282 |
| 11 | 79988714 | rs1949886  | 80007549 | rs4614474  | 0.411 |
| 11 | 80007427 | rs2373547  | 80022511 | rs11232256 | 0.428 |
| 11 | 82104086 | rs533709   | 82111606 | rs497360   | 0.426 |
| 11 | 82913481 | rs6592120  | 82970299 | rs515618   | 0.488 |
| 11 | 82913481 | rs6592120  | 82974099 | rs558211   | 0.473 |
| 11 | 82970299 | rs515618   | 82974099 | rs558211   | 0.990 |
| 11 | 84463780 | rs1826613  | 84463859 | rs1823777  | 1.000 |
| 11 | 87104758 | rs4485130  | 88020199 | rs7396702  | 0.226 |
| 11 | 87104758 | rs4485130  | 88073510 | rs10082580 | 0.206 |
| 11 | 87855625 | rs613716   | 87857870 | rs308766   | 0.677 |
| 11 | 87857870 | rs308766   | 88073510 | rs10082580 | 0.224 |
| 11 | 88020199 | rs7396702  | 88073510 | rs10082580 | 0.433 |
| 11 | 88020199 | rs7396702  | 88074716 | rs961689   | 0.369 |
| 11 | 88073510 | rs10082580 | 88074716 | rs961689   | 0.287 |
| 11 | 89508403 | rs10734123 | 89535588 | rs7928477  | 1.000 |
| 11 | 89508403 | rs10734123 | 89538230 | rs10732446 | 0.991 |
| 11 | 89508403 | rs10734123 | 89538330 | rs10732447 | 0.971 |
| 11 | 89535588 | rs7928477  | 89538230 | rs10732446 | 0.990 |
| 11 | 89535588 | rs7928477  | 89538330 | rs10732447 | 0.968 |
| 11 | 89538230 | rs10732446 | 89538330 | rs10732447 | 0.962 |
| 11 | 89761523 | rs2048139  | 89842824 | rs10830506 | 0.877 |
| 11 | 89761523 | rs2048139  | 89921579 | rs10501721 | 0.834 |
| 11 | 89761523 | rs2048139  | 89996935 | rs10765374 | 0.789 |
| 11 | 89842824 | rs10830506 | 89921579 | rs10501721 | 0.863 |
| 11 | 89842824 | rs10830506 | 89996935 | rs10765374 | 0.904 |
| 11 | 89921579 | rs10501721 | 89996935 | rs10765374 | 0.892 |
| 11 | 91755571 | rs7127751  | 91831533 | rs643695   | 0.620 |
| 11 | 93890094 | rs629119   | 93890123 | rs629156   | 1.000 |
| 11 | 93890094 | rs629119   | 93906765 | rs11020812 | 0.251 |
| 11 | 93890123 | rs629156   | 93906765 | rs11020812 | 0.251 |
| 11 | 93894907 | rs16924603 | 93906765 | rs11020812 | 0.536 |
| 11 | 93894907 | rs16924603 | 93948540 | rs11020836 | 0.354 |
| 11 | 93906765 | rs11020812 | 93948540 | rs11020836 | 0.289 |
| 11 | 94989214 | rs11021246 | 95008102 | rs12365735 | 0.488 |
| 11 | 96761688 | rs12294161 | 96762309 | rs347768   | 0.337 |
| 11 | 97962694 | rs11216033 | 97966670 | rs9783305  | 0.911 |

|    |           |            |           |            |       |
|----|-----------|------------|-----------|------------|-------|
| 11 | 99128324  | rs11221224 | 99245527  | rs10894037 | 0.228 |
| 11 | 100221671 | rs667504   | 100248072 | rs10750596 | 0.470 |
| 11 | 101225143 | rs10501992 | 101225220 | rs4315037  | 0.984 |
| 11 | 101970436 | rs1711437  | 101974719 | rs1784408  | 0.729 |
| 11 | 101970436 | rs1711437  | 101982216 | rs1711427  | 0.879 |
| 11 | 101974719 | rs1784408  | 101982216 | rs1711427  | 0.682 |
| 11 | 103713704 | rs11226307 | 103804161 | rs4755036  | 0.490 |
| 11 | 103713704 | rs11226307 | 103836649 | rs10791703 | 0.409 |
| 11 | 103713704 | rs11226307 | 103902520 | rs1487687  | 0.277 |
| 11 | 103804161 | rs4755036  | 103836649 | rs10791703 | 0.828 |
| 11 | 103804161 | rs4755036  | 103902520 | rs1487687  | 0.565 |
| 11 | 103836649 | rs10791703 | 103902520 | rs1487687  | 0.705 |
| 11 | 105388824 | rs2847181  | 105416001 | rs11226905 | 0.437 |
| 11 | 105388824 | rs2847181  | 105425885 | rs6591148  | 0.401 |
| 11 | 107040834 | rs477835   | 107329312 | rs747145   | 0.242 |
| 11 | 107210818 | rs488081   | 107212100 | rs565438   | 1.000 |
| 11 | 108419593 | rs1396915  | 108420513 | rs12576077 | 0.873 |
| 11 | 109727259 | rs17111116 | 109803757 | rs4753891  | 0.401 |
| 11 | 109727259 | rs17111116 | 109809813 | rs7121928  | 0.399 |
| 11 | 109803757 | rs4753891  | 109809813 | rs7121928  | 0.890 |
| 11 | 109862212 | rs10891124 | 109862633 | rs11213434 | 0.739 |
| 11 | 110113005 | rs7121407  | 110116860 | rs7107797  | 0.699 |
| 11 | 111044537 | rs4630327  | 111130295 | rs4936678  | 0.288 |
| 11 | 112348635 | rs10502161 | 112384205 | rs4595579  | 0.876 |
| 11 | 112348635 | rs10502161 | 112525792 | rs4366519  | 0.319 |
| 11 | 112384205 | rs4595579  | 112525792 | rs4366519  | 0.353 |
| 11 | 114169861 | rs10502193 | 114244549 | rs17117693 | 0.526 |
| 11 | 115728019 | rs2512160  | 115742992 | rs488435   | 0.369 |
| 11 | 116332080 | rs10502221 | 116576067 | rs664971   | 0.261 |
| 11 | 116361852 | rs588918   | 116413493 | rs7115242  | 0.661 |
| 11 | 116361852 | rs588918   | 116448564 | rs1351452  | 0.978 |
| 11 | 116361852 | rs588918   | 116567580 | rs1242229  | 0.828 |
| 11 | 116361852 | rs588918   | 116576067 | rs664971   | 0.230 |
| 11 | 116413493 | rs7115242  | 116448564 | rs1351452  | 0.689 |
| 11 | 116413493 | rs7115242  | 116567580 | rs1242229  | 0.730 |
| 11 | 116448564 | rs1351452  | 116567580 | rs1242229  | 0.850 |
| 11 | 116448564 | rs1351452  | 116576067 | rs664971   | 0.232 |
| 11 | 116567580 | rs1242229  | 116576067 | rs664971   | 0.227 |
| 11 | 118226208 | rs4938565  | 118235879 | rs7933007  | 0.918 |
| 11 | 119411118 | rs1530919  | 119433098 | rs1545509  | 0.817 |
| 11 | 119411118 | rs1530919  | 119434655 | rs10444338 | 0.662 |
| 11 | 119433098 | rs1545509  | 119434655 | rs10444338 | 0.770 |
| 11 | 119453342 | rs1551238  | 119477197 | rs6589801  | 0.455 |
| 11 | 119453342 | rs1551238  | 119506905 | rs670855   | 0.232 |

|    |           |            |           |            |       |
|----|-----------|------------|-----------|------------|-------|
| 11 | 119453342 | rs1551238  | 119558860 | rs494965   | 0.247 |
| 11 | 119506905 | rs670855   | 119558860 | rs494965   | 0.657 |
| 11 | 119879098 | rs3925505  | 119882018 | rs17311303 | 0.928 |
| 11 | 120625340 | rs948379   | 120642900 | rs10892714 | 0.463 |
| 11 | 120660151 | rs1583124  | 120670302 | rs891441   | 0.343 |
| 11 | 122544050 | rs10790558 | 122546723 | rs7102292  | 0.740 |
| 11 | 122544050 | rs10790558 | 122568575 | rs6589973  | 0.344 |
| 11 | 122546723 | rs7102292  | 122568575 | rs6589973  | 0.486 |
| 11 | 124327379 | rs4575285  | 124347498 | rs4595559  | 0.257 |
| 11 | 125396479 | rs3740912  | 125427135 | rs485327   | 0.280 |
| 11 | 126255140 | rs4937214  | 126256273 | rs1939988  | 0.842 |
| 11 | 126845830 | rs1406330  | 126861194 | rs749513   | 0.652 |
| 11 | 128159454 | rs670163   | 128191473 | rs681296   | 0.287 |
| 11 | 128206751 | rs588957   | 128206861 | rs588472   | 0.554 |
| 11 | 128206751 | rs588957   | 128238171 | rs2855798  | 0.347 |
| 11 | 128206861 | rs588472   | 128238171 | rs2855798  | 0.272 |
| 11 | 129099080 | rs691766   | 129099231 | rs504990   | 0.949 |
| 11 | 129118377 | rs10894126 | 129118397 | rs691570   | 0.637 |
| 11 | 130414235 | rs1655490  | 130414497 | rs1793220  | 1.000 |
| 11 | 132004415 | rs10894592 | 132007648 | rs9633971  | 0.784 |
| 11 | 134313007 | rs1824832  | 134435899 | rs4540845  | 0.240 |
| 12 | 221584    | rs515639   | 228276    | rs523169   | 0.927 |
| 12 | 3424976   | rs7961141  | 3425082   | rs10744613 | 0.507 |
| 12 | 3424976   | rs7961141  | 3426611   | rs6489469  | 0.930 |
| 12 | 3425082   | rs10744613 | 3426611   | rs6489469  | 0.508 |
| 12 | 3718933   | rs16930743 | 3721838   | rs16930761 | 1.000 |
| 12 | 5442242   | rs17722632 | 5467642   | rs4930767  | 0.286 |
| 12 | 5855732   | rs6489666  | 5859898   | rs7484640  | 0.981 |
| 12 | 7419738   | rs7306824  | 7534052   | rs7953031  | 0.204 |
| 12 | 7534052   | rs7953031  | 7546404   | rs3210140  | 0.240 |
| 12 | 7534052   | rs7953031  | 7627020   | rs1558531  | 0.205 |
| 12 | 11754082  | rs2724588  | 11764555  | rs17818498 | 0.736 |
| 12 | 11754082  | rs2724588  | 11781775  | rs12369491 | 0.460 |
| 12 | 11754082  | rs2724588  | 11783232  | rs12828066 | 0.339 |
| 12 | 11764555  | rs17818498 | 11781775  | rs12369491 | 0.685 |
| 12 | 11764555  | rs17818498 | 11783232  | rs12828066 | 0.507 |
| 12 | 11781775  | rs12369491 | 11783232  | rs12828066 | 0.611 |
| 12 | 13067577  | rs6488576  | 13093286  | rs7294646  | 0.466 |
| 12 | 13091145  | rs1552389  | 13093286  | rs7294646  | 0.421 |
| 12 | 13093286  | rs7294646  | 13170986  | rs4583067  | 0.201 |
| 12 | 16015699  | rs6488806  | 16016060  | rs3782545  | 0.991 |
| 12 | 16015699  | rs6488806  | 16027219  | rs1868805  | 0.876 |
| 12 | 16016060  | rs3782545  | 16027219  | rs1868805  | 0.885 |
| 12 | 20247248  | rs7970503  | 20262861  | rs7976912  | 0.785 |

|    |          |            |          |            |       |
|----|----------|------------|----------|------------|-------|
| 12 | 23626010 | rs11046989 | 23632891 | rs16926425 | 0.842 |
| 12 | 26208437 | rs7300697  | 26229561 | rs10842688 | 0.925 |
| 12 | 26208437 | rs7300697  | 26229632 | rs10842689 | 0.917 |
| 12 | 26229561 | rs10842688 | 26229632 | rs10842689 | 0.992 |
| 12 | 26504908 | rs11048530 | 26520918 | rs3736183  | 0.616 |
| 12 | 26682161 | rs7972648  | 26685022 | rs1463590  | 0.865 |
| 12 | 28226189 | rs7294486  | 28423261 | rs10506031 | 0.566 |
| 12 | 28876460 | rs1480636  | 28876540 | rs1480635  | 0.941 |
| 12 | 28876460 | rs1480636  | 28877817 | rs789123   | 0.461 |
| 12 | 28876540 | rs1480635  | 28877817 | rs789123   | 0.500 |
| 12 | 29081528 | rs4931135  | 29119551 | rs10771478 | 0.400 |
| 12 | 29818043 | rs2882467  | 29823051 | rs11050428 | 0.584 |
| 12 | 30195234 | rs10743696 | 30204772 | rs7311139  | 0.978 |
| 12 | 30446335 | rs7979416  | 30481442 | rs10771719 | 0.454 |
| 12 | 32644486 | rs10844251 | 32717095 | rs10771978 | 0.359 |
| 12 | 38943492 | rs4293189  | 39028521 | rs10878405 | 0.420 |
| 12 | 39198429 | rs17128391 | 39281690 | rs41353744 | 0.406 |
| 12 | 39454516 | rs17128779 | 39466178 | rs6581955  | 0.475 |
| 12 | 40411394 | rs7316844  | 40413042 | rs1466790  | 1.000 |
| 12 | 40411394 | rs7316844  | 40413058 | rs1466791  | 0.977 |
| 12 | 40411394 | rs7316844  | 40427439 | rs1532451  | 0.425 |
| 12 | 40413042 | rs1466790  | 40413058 | rs1466791  | 0.977 |
| 12 | 40413042 | rs1466790  | 40427439 | rs1532451  | 0.425 |
| 12 | 40413058 | rs1466791  | 40427439 | rs1532451  | 0.404 |
| 12 | 40640896 | rs1234032  | 40872206 | rs1238290  | 0.453 |
| 12 | 40850256 | rs12371615 | 40872206 | rs1238290  | 0.253 |
| 12 | 40850256 | rs12371615 | 41128742 | rs1796381  | 0.751 |
| 12 | 40872206 | rs1238290  | 41128742 | rs1796381  | 0.251 |
| 12 | 41661598 | rs7308182  | 41715122 | rs10880415 | 0.204 |
| 12 | 42797754 | rs10506235 | 42888643 | rs17094231 | 0.425 |
| 12 | 42797754 | rs10506235 | 42890075 | rs17094242 | 0.905 |
| 12 | 42888643 | rs17094231 | 42890075 | rs17094242 | 0.515 |
| 12 | 42888643 | rs17094231 | 43088189 | rs12308701 | 0.451 |
| 12 | 43605390 | rs17095247 | 43989972 | rs17095721 | 0.687 |
| 12 | 45214660 | rs17096991 | 45231962 | rs17121412 | 0.869 |
| 12 | 45214660 | rs17096991 | 45258412 | rs2471618  | 0.946 |
| 12 | 45231962 | rs17121412 | 45258412 | rs2471618  | 0.811 |
| 12 | 46291715 | rs668968   | 46317652 | rs1302919  | 0.458 |
| 12 | 46788841 | rs17122666 | 46812979 | rs2228500  | 1.000 |
| 12 | 49214148 | rs4768887  | 49253045 | rs7301125  | 1.000 |
| 12 | 49214148 | rs4768887  | 49374124 | rs10506296 | 0.448 |
| 12 | 49253045 | rs7301125  | 49374124 | rs10506296 | 0.448 |
| 12 | 51344781 | rs1994516  | 51368520 | rs1567757  | 0.674 |
| 12 | 56754430 | rs2720174  | 57062804 | rs10506381 | 0.202 |

|    |          |            |          |            |       |
|----|----------|------------|----------|------------|-------|
| 12 | 57849389 | rs10877221 | 57865135 | rs10877232 | 0.847 |
| 12 | 57849389 | rs10877221 | 57896472 | rs11172950 | 0.846 |
| 12 | 57849389 | rs10877221 | 58062330 | rs10877268 | 0.451 |
| 12 | 57849389 | rs10877221 | 58087199 | rs276056   | 0.219 |
| 12 | 57865135 | rs10877232 | 57896472 | rs11172950 | 0.887 |
| 12 | 57865135 | rs10877232 | 58062330 | rs10877268 | 0.429 |
| 12 | 57865135 | rs10877232 | 58087199 | rs276056   | 0.207 |
| 12 | 57896472 | rs11172950 | 58062330 | rs10877268 | 0.472 |
| 12 | 57896472 | rs11172950 | 58087199 | rs276056   | 0.218 |
| 12 | 58062330 | rs10877268 | 58087199 | rs276056   | 0.464 |
| 12 | 58300154 | rs17122718 | 58324202 | rs982321   | 0.724 |
| 12 | 58300154 | rs17122718 | 58334869 | rs17122785 | 0.698 |
| 12 | 58324202 | rs982321   | 58334869 | rs17122785 | 0.965 |
| 12 | 60088543 | rs1516032  | 60110245 | rs10877662 | 0.870 |
| 12 | 60682041 | rs7963802  | 60780616 | rs11174316 | 0.202 |
| 12 | 60682041 | rs7963802  | 60825121 | rs11174347 | 0.332 |
| 12 | 60780616 | rs11174316 | 60825121 | rs11174347 | 0.389 |
| 12 | 65582311 | rs2904532  | 65609808 | rs10878535 | 0.211 |
| 12 | 65582311 | rs2904532  | 65619225 | rs12820762 | 0.563 |
| 12 | 66120331 | rs1152882  | 66776260 | rs10735944 | 0.238 |
| 12 | 66820607 | rs2216164  | 66823141 | rs2193048  | 0.421 |
| 12 | 66820607 | rs2216164  | 66830897 | rs2870953  | 0.421 |
| 12 | 66820607 | rs2216164  | 66867288 | rs10878779 | 0.423 |
| 12 | 66820607 | rs2216164  | 66917055 | rs734871   | 0.200 |
| 12 | 66823141 | rs2193048  | 66830897 | rs2870953  | 1.000 |
| 12 | 66823141 | rs2193048  | 66867288 | rs10878779 | 0.932 |
| 12 | 66830897 | rs2870953  | 66867288 | rs10878779 | 0.932 |
| 12 | 66905871 | rs11570915 | 66918123 | rs17700390 | 0.909 |
| 12 | 71360679 | rs1807989  | 71377874 | rs11179324 | 0.913 |
| 12 | 73381431 | rs7314330  | 73394160 | rs7138969  | 0.575 |
| 12 | 73604536 | rs10785156 | 73708472 | rs10506678 | 0.529 |
| 12 | 74375206 | rs10879961 | 74375460 | rs7969436  | 0.749 |
| 12 | 75222674 | rs7962515  | 75378005 | rs10778674 | 0.245 |
| 12 | 78318095 | rs1405493  | 78331410 | rs7315638  | 0.938 |
| 12 | 78318095 | rs1405493  | 78347982 | rs2251214  | 0.577 |
| 12 | 78318095 | rs1405493  | 78446450 | rs7138252  | 0.610 |
| 12 | 78331410 | rs7315638  | 78347982 | rs2251214  | 0.621 |
| 12 | 78331410 | rs7315638  | 78446450 | rs7138252  | 0.657 |
| 12 | 78347982 | rs2251214  | 78446450 | rs7138252  | 0.533 |
| 12 | 78455616 | rs11114162 | 78828941 | rs1463228  | 0.235 |
| 12 | 79247890 | rs1451098  | 79281780 | rs896202   | 0.536 |
| 12 | 79247890 | rs1451098  | 79330649 | rs2717473  | 0.374 |
| 12 | 79281780 | rs896202   | 79330649 | rs2717473  | 0.737 |
| 12 | 80017957 | rs12301355 | 80018383 | rs12296937 | 0.953 |

|    |          |            |          |            |       |
|----|----------|------------|----------|------------|-------|
| 12 | 80912999 | rs10506856 | 80991051 | rs11115179 | 0.373 |
| 12 | 82113049 | rs7137313  | 82115436 | rs1517815  | 0.715 |
| 12 | 82113049 | rs7137313  | 82140528 | rs4482098  | 0.549 |
| 12 | 82113049 | rs7137313  | 82219067 | rs7484818  | 0.260 |
| 12 | 82113049 | rs7137313  | 82241901 | rs11115730 | 0.254 |
| 12 | 82115436 | rs1517815  | 82140528 | rs4482098  | 0.376 |
| 12 | 82115436 | rs1517815  | 82219067 | rs7484818  | 0.343 |
| 12 | 82115436 | rs1517815  | 82241901 | rs11115730 | 0.344 |
| 12 | 82140528 | rs4482098  | 82219067 | rs7484818  | 0.458 |
| 12 | 82140528 | rs4482098  | 82241901 | rs11115730 | 0.454 |
| 12 | 82140528 | rs4482098  | 82270137 | rs7959848  | 0.344 |
| 12 | 82219067 | rs7484818  | 82241901 | rs11115730 | 0.975 |
| 12 | 82219067 | rs7484818  | 82270137 | rs7959848  | 0.242 |
| 12 | 82241901 | rs11115730 | 82270137 | rs7959848  | 0.237 |
| 12 | 83124941 | rs2929815  | 83175715 | rs12581616 | 0.910 |
| 12 | 83124941 | rs2929815  | 83179322 | rs12320923 | 0.919 |
| 12 | 83124941 | rs2929815  | 83180847 | rs17011775 | 0.928 |
| 12 | 83124941 | rs2929815  | 83181327 | rs7135755  | 0.920 |
| 12 | 83124941 | rs2929815  | 83181851 | rs4491329  | 0.920 |
| 12 | 83124941 | rs2929815  | 83183659 | rs11116280 | 0.920 |
| 12 | 83124941 | rs2929815  | 83184837 | rs12313738 | 0.920 |
| 12 | 83124941 | rs2929815  | 83208883 | rs7973519  | 0.892 |
| 12 | 83175715 | rs12581616 | 83179322 | rs12320923 | 0.990 |
| 12 | 83175715 | rs12581616 | 83180847 | rs17011775 | 0.979 |
| 12 | 83175715 | rs12581616 | 83181327 | rs7135755  | 0.990 |
| 12 | 83175715 | rs12581616 | 83181851 | rs4491329  | 0.990 |
| 12 | 83175715 | rs12581616 | 83183659 | rs11116280 | 0.990 |
| 12 | 83175715 | rs12581616 | 83184837 | rs12313738 | 0.990 |
| 12 | 83175715 | rs12581616 | 83208883 | rs7973519  | 0.940 |
| 12 | 83179322 | rs12320923 | 83180847 | rs17011775 | 0.989 |
| 12 | 83179322 | rs12320923 | 83181327 | rs7135755  | 1.000 |
| 12 | 83179322 | rs12320923 | 83181851 | rs4491329  | 1.000 |
| 12 | 83179322 | rs12320923 | 83183659 | rs11116280 | 1.000 |
| 12 | 83179322 | rs12320923 | 83184837 | rs12313738 | 1.000 |
| 12 | 83179322 | rs12320923 | 83208883 | rs7973519  | 0.950 |
| 12 | 83180847 | rs17011775 | 83181327 | rs7135755  | 0.989 |
| 12 | 83180847 | rs17011775 | 83181851 | rs4491329  | 0.989 |
| 12 | 83180847 | rs17011775 | 83183659 | rs11116280 | 0.989 |
| 12 | 83180847 | rs17011775 | 83184837 | rs12313738 | 0.989 |
| 12 | 83180847 | rs17011775 | 83208883 | rs7973519  | 0.939 |
| 12 | 83181327 | rs7135755  | 83181851 | rs4491329  | 1.000 |
| 12 | 83181327 | rs7135755  | 83183659 | rs11116280 | 1.000 |
| 12 | 83181327 | rs7135755  | 83184837 | rs12313738 | 1.000 |
| 12 | 83181327 | rs7135755  | 83208883 | rs7973519  | 0.950 |



|    |           |            |           |            |       |
|----|-----------|------------|-----------|------------|-------|
| 12 | 83181851  | rs4491329  | 83183659  | rs11116280 | 1.000 |
| 12 | 83181851  | rs4491329  | 83184837  | rs12313738 | 1.000 |
| 12 | 83181851  | rs4491329  | 83208883  | rs7973519  | 0.950 |
| 12 | 83183659  | rs11116280 | 83184837  | rs12313738 | 1.000 |
| 12 | 83183659  | rs11116280 | 83208883  | rs7973519  | 0.950 |
| 12 | 83184837  | rs12313738 | 83208883  | rs7973519  | 0.950 |
| 12 | 84191889  | rs7486001  | 84314940  | rs1398440  | 0.306 |
| 12 | 84191889  | rs7486001  | 84334038  | rs1398442  | 0.243 |
| 12 | 84191889  | rs7486001  | 84457457  | rs7484736  | 0.203 |
| 12 | 84314940  | rs1398440  | 84334038  | rs1398442  | 0.797 |
| 12 | 85651980  | rs7975477  | 86028234  | rs1368563  | 0.224 |
| 12 | 86909836  | rs10777085 | 86913935  | rs11104708 | 0.505 |
| 12 | 91544383  | rs11614500 | 91649196  | rs7972216  | 0.200 |
| 12 | 91544383  | rs11614500 | 91658207  | rs7958821  | 0.237 |
| 12 | 91545805  | rs41464449 | 91551302  | rs10777420 | 0.342 |
| 12 | 91551302  | rs10777420 | 91609585  | rs2120575  | 0.290 |
| 12 | 91649196  | rs7972216  | 91658207  | rs7958821  | 0.712 |
| 12 | 92872354  | rs7135433  | 92873911  | rs4761756  | 1.000 |
| 12 | 93678633  | rs6538534  | 93684736  | rs7972350  | 0.235 |
| 12 | 93678633  | rs6538534  | 93702211  | rs4761664  | 0.335 |
| 12 | 93678633  | rs6538534  | 93777015  | rs10777641 | 0.282 |
| 12 | 94875228  | rs4762652  | 94878586  | rs2043608  | 0.991 |
| 12 | 94875228  | rs4762652  | 94880938  | rs7961807  | 0.991 |
| 12 | 94878586  | rs2043608  | 94880938  | rs7961807  | 1.000 |
| 12 | 96582908  | rs34537    | 96584094  | rs34540    | 0.964 |
| 12 | 100574306 | rs11110932 | 100578274 | rs11110939 | 1.000 |
| 12 | 101041934 | rs2036771  | 101351571 | rs11111272 | 0.494 |
| 12 | 101515117 | rs2100635  | 101515601 | rs7977073  | 0.747 |
| 12 | 101515117 | rs2100635  | 101607332 | rs937471   | 0.479 |
| 12 | 101515601 | rs7977073  | 101607332 | rs937471   | 0.394 |
| 12 | 102589976 | rs1863878  | 102591942 | rs11614418 | 0.507 |
| 12 | 102893176 | rs4135081  | 102964551 | rs7971994  | 0.691 |
| 12 | 102893176 | rs4135081  | 102972036 | rs7132831  | 0.691 |
| 12 | 102964551 | rs7971994  | 102972036 | rs7132831  | 1.000 |
| 12 | 106093855 | rs2178492  | 106149778 | rs11113221 | 0.426 |
| 12 | 106093855 | rs2178492  | 106201676 | rs1861691  | 0.584 |
| 12 | 106127287 | rs1861693  | 106149778 | rs11113221 | 0.220 |
| 12 | 106149778 | rs11113221 | 106201676 | rs1861691  | 0.420 |
| 12 | 106310763 | rs1426463  | 106311013 | rs1426462  | 0.930 |
| 12 | 106857124 | rs1895941  | 106917975 | rs12316047 | 0.757 |
| 12 | 106857124 | rs1895941  | 106970207 | rs881512   | 0.390 |
| 12 | 106917975 | rs12316047 | 106970207 | rs881512   | 0.447 |
| 12 | 112763094 | rs4767142  | 112790428 | rs7138196  | 0.918 |
| 12 | 112791494 | rs10850232 | 112860872 | rs11066834 | 0.281 |

|    |           |            |           |            |       |
|----|-----------|------------|-----------|------------|-------|
| 12 | 112791494 | rs10850232 | 112871319 | rs9668746  | 0.236 |
| 12 | 112791494 | rs10850232 | 112875893 | rs11066850 | 0.280 |
| 12 | 112860872 | rs11066834 | 112871319 | rs9668746  | 0.963 |
| 12 | 112860872 | rs11066834 | 112875893 | rs11066850 | 1.000 |
| 12 | 112871319 | rs9668746  | 112875893 | rs11066850 | 0.963 |
| 12 | 113036063 | rs11066946 | 113037816 | rs11066947 | 1.000 |
| 12 | 113036063 | rs11066946 | 113071155 | rs10082740 | 0.654 |
| 12 | 113037816 | rs11066947 | 113071155 | rs10082740 | 0.654 |
| 12 | 117515417 | rs1402341  | 117556888 | rs10851005 | 0.207 |
| 12 | 120034006 | rs651221   | 120039181 | rs618201   | 0.211 |
| 12 | 120034006 | rs651221   | 120078439 | rs208290   | 0.429 |
| 12 | 120039181 | rs618201   | 120160097 | rs2567982  | 0.202 |
| 12 | 121628547 | rs11058797 | 121690655 | rs11059100 | 0.614 |
| 12 | 121628547 | rs11058797 | 121707640 | rs11059258 | 0.804 |
| 12 | 121690655 | rs11059100 | 121707640 | rs11059258 | 0.747 |
| 12 | 121913655 | rs4759438  | 121922964 | rs4759384  | 1.000 |
| 12 | 124445806 | rs323846   | 124451257 | rs325095   | 0.665 |
| 12 | 124918806 | rs7132603  | 124918954 | rs10847004 | 1.000 |
| 12 | 126554901 | rs10128788 | 126555865 | rs2682617  | 0.729 |
| 12 | 126999998 | rs10744341 | 127000966 | rs2730764  | 0.508 |
| 12 | 130748513 | rs10794422 | 130857014 | rs10751695 | 0.262 |
| 13 | 19482060  | rs9579762  | 19506560  | rs1543536  | 0.597 |
| 13 | 20974829  | rs9509767  | 20976174  | rs7328675  | 1.000 |
| 13 | 21199079  | rs1122257  | 21211165  | rs9285177  | 0.907 |
| 13 | 21199079  | rs1122257  | 21212101  | rs7323292  | 0.906 |
| 13 | 21211165  | rs9285177  | 21212101  | rs7323292  | 0.845 |
| 13 | 21423846  | rs3117948  | 21432122  | rs3117963  | 0.782 |
| 13 | 23943158  | rs1807111  | 23948923  | rs17384669 | 1.000 |
| 13 | 24589022  | rs41365447 | 24608667  | rs17081816 | 0.324 |
| 13 | 24589022  | rs41365447 | 24611522  | rs9507470  | 0.262 |
| 13 | 24611365  | rs9507469  | 24611522  | rs9507470  | 0.564 |
| 13 | 25309084  | rs9511934  | 25322692  | rs9511940  | 0.914 |
| 13 | 25492700  | rs1048789  | 25498688  | rs9512034  | 0.226 |
| 13 | 28945005  | rs2388084  | 28945180  | rs4262814  | 0.454 |
| 13 | 30760334  | rs7998271  | 30803942  | rs2056443  | 0.647 |
| 13 | 31340015  | rs623441   | 31340347  | rs622702   | 0.922 |
| 13 | 31619615  | rs2285330  | 31638925  | rs798978   | 0.214 |
| 13 | 31674603  | rs2428249  | 31685876  | rs798987   | 1.000 |
| 13 | 33304194  | rs3135611  | 33345299  | rs5008744  | 0.547 |
| 13 | 33715579  | rs9571278  | 33754295  | rs11147546 | 0.318 |
| 13 | 34224833  | rs9564625  | 34229033  | rs7334657  | 0.872 |
| 13 | 36991541  | rs1072781  | 36998807  | rs17255466 | 0.200 |
| 13 | 37033780  | rs7995907  | 37131370  | rs9566247  | 0.576 |
| 13 | 37703926  | rs2202122  | 37712629  | rs7338934  | 0.991 |

|    |          |            |          |            |       |
|----|----------|------------|----------|------------|-------|
| 13 | 38484051 | rs12428445 | 38535373 | rs1536342  | 0.337 |
| 13 | 40438502 | rs4942014  | 40460786 | rs9594471  | 0.222 |
| 13 | 41831354 | rs238271   | 41862203 | rs17457561 | 0.225 |
| 13 | 41862203 | rs17457561 | 41956974 | rs4942131  | 0.512 |
| 13 | 41862203 | rs17457561 | 41958784 | rs9525630  | 0.548 |
| 13 | 41956974 | rs4942131  | 41958784 | rs9525630  | 0.989 |
| 13 | 42792796 | rs12172797 | 42807697 | rs9567151  | 1.000 |
| 13 | 43151109 | rs9316052  | 43216673 | rs9525835  | 0.729 |
| 13 | 43151109 | rs9316052  | 43242300 | rs9590787  | 0.801 |
| 13 | 43216673 | rs9525835  | 43242300 | rs9590787  | 0.871 |
| 13 | 44202415 | rs4942352  | 44217586 | rs912160   | 0.224 |
| 13 | 49643972 | rs7333147  | 49646219 | rs2066613  | 0.896 |
| 13 | 49643972 | rs7333147  | 49649759 | rs2066615  | 0.353 |
| 13 | 49643972 | rs7333147  | 49650483 | rs2066617  | 0.385 |
| 13 | 49646219 | rs2066613  | 49649759 | rs2066615  | 0.440 |
| 13 | 49646219 | rs2066613  | 49649964 | rs1149839  | 0.232 |
| 13 | 49646219 | rs2066613  | 49650483 | rs2066617  | 0.473 |
| 13 | 49649759 | rs2066615  | 49649964 | rs1149839  | 0.551 |
| 13 | 49649759 | rs2066615  | 49650483 | rs2066617  | 0.836 |
| 13 | 49649964 | rs1149839  | 49650483 | rs2066617  | 0.638 |
| 13 | 53726962 | rs7995015  | 53726985 | rs1413878  | 0.224 |
| 13 | 54629926 | rs3125742  | 55117315 | rs681846   | 0.523 |
| 13 | 54710942 | rs1370079  | 54730139 | rs1436703  | 0.904 |
| 13 | 54710942 | rs1370079  | 54763118 | rs7989059  | 0.888 |
| 13 | 54730139 | rs1436703  | 54763118 | rs7989059  | 0.982 |
| 13 | 56012278 | rs2315031  | 56333987 | rs9537493  | 0.201 |
| 13 | 56453118 | rs2152734  | 56848099 | rs2186032  | 0.522 |
| 13 | 56453118 | rs2152734  | 56850408 | rs4886014  | 0.258 |
| 13 | 56453118 | rs2152734  | 56861712 | rs7339239  | 0.522 |
| 13 | 56534058 | rs2777625  | 56727320 | rs1412160  | 0.341 |
| 13 | 56534058 | rs2777625  | 56810406 | rs1936761  | 0.317 |
| 13 | 56727320 | rs1412160  | 56848099 | rs2186032  | 0.233 |
| 13 | 56727320 | rs1412160  | 56861712 | rs7339239  | 0.233 |
| 13 | 56727320 | rs1412160  | 57584799 | rs3012861  | 0.291 |
| 13 | 56810406 | rs1936761  | 56848099 | rs2186032  | 0.326 |
| 13 | 56810406 | rs1936761  | 56861712 | rs7339239  | 0.326 |
| 13 | 56848099 | rs2186032  | 56850408 | rs4886014  | 0.294 |
| 13 | 56848099 | rs2186032  | 56861712 | rs7339239  | 1.000 |
| 13 | 56850408 | rs4886014  | 56861712 | rs7339239  | 0.294 |
| 13 | 56850408 | rs4886014  | 56996265 | rs9569702  | 0.395 |
| 13 | 59674961 | rs11148489 | 59706318 | rs9570276  | 0.541 |
| 13 | 60323660 | rs8001190  | 60334598 | rs301669   | 0.313 |
| 13 | 61260157 | rs2323533  | 61321688 | rs17060411 | 0.471 |
| 13 | 63777356 | rs1340332  | 63865034 | rs7985144  | 0.475 |

|    |          |            |          |            |       |
|----|----------|------------|----------|------------|-------|
| 13 | 65319445 | rs957460   | 65339681 | rs4883761  | 0.661 |
| 13 | 65673401 | rs1407581  | 65689725 | rs1322735  | 0.594 |
| 13 | 65673401 | rs1407581  | 65721667 | rs4884662  | 0.327 |
| 13 | 65689725 | rs1322735  | 65721667 | rs4884662  | 0.554 |
| 13 | 65689725 | rs1322735  | 65755652 | rs10459387 | 0.283 |
| 13 | 67439378 | rs17083015 | 67503046 | rs1416138  | 0.877 |
| 13 | 67439378 | rs17083015 | 67508340 | rs9541269  | 0.869 |
| 13 | 67503046 | rs1416138  | 67508340 | rs9541269  | 1.000 |
| 13 | 69780707 | rs9599610  | 69780842 | rs9599611  | 0.888 |
| 13 | 69849063 | rs12859922 | 69849087 | rs12858938 | 0.673 |
| 13 | 69849063 | rs12859922 | 69862904 | rs2151491  | 0.878 |
| 13 | 69849087 | rs12858938 | 69862904 | rs2151491  | 0.629 |
| 13 | 71481059 | rs9542806  | 71486210 | rs9542808  | 0.699 |
| 13 | 71481059 | rs9542806  | 71505941 | rs1460446  | 0.489 |
| 13 | 71481059 | rs9542806  | 71517526 | rs2706411  | 0.573 |
| 13 | 71481059 | rs9542806  | 71559437 | rs1022958  | 0.357 |
| 13 | 71481059 | rs9542806  | 71570155 | rs1326683  | 0.511 |
| 13 | 71481059 | rs9542806  | 71571034 | rs9529959  | 0.312 |
| 13 | 71486210 | rs9542808  | 71505941 | rs1460446  | 0.248 |
| 13 | 71486210 | rs9542808  | 71517526 | rs2706411  | 0.710 |
| 13 | 71486210 | rs9542808  | 71570155 | rs1326683  | 0.296 |
| 13 | 71486210 | rs9542808  | 71571034 | rs9529959  | 0.208 |
| 13 | 71505941 | rs1460446  | 71517526 | rs2706411  | 0.280 |
| 13 | 71505941 | rs1460446  | 71559437 | rs1022958  | 0.741 |
| 13 | 71505941 | rs1460446  | 71570155 | rs1326683  | 0.601 |
| 13 | 71505941 | rs1460446  | 71571034 | rs9529959  | 0.250 |
| 13 | 71505941 | rs1460446  | 71574322 | rs17791199 | 0.201 |
| 13 | 71517526 | rs2706411  | 71559437 | rs1022958  | 0.206 |
| 13 | 71517526 | rs2706411  | 71570155 | rs1326683  | 0.381 |
| 13 | 71517526 | rs2706411  | 71571034 | rs9529959  | 0.275 |
| 13 | 71559437 | rs1022958  | 71570155 | rs1326683  | 0.682 |
| 13 | 71559437 | rs1022958  | 71571034 | rs9529959  | 0.329 |
| 13 | 71559437 | rs1022958  | 71574322 | rs17791199 | 0.248 |
| 13 | 71570155 | rs1326683  | 71571034 | rs9529959  | 0.417 |
| 13 | 71822612 | rs568474   | 71823339 | rs9599954  | 0.845 |
| 13 | 75960658 | rs2782991  | 75974819 | rs283975   | 0.825 |
| 13 | 79496358 | rs3910574  | 79500112 | rs9545302  | 0.331 |
| 13 | 80391966 | rs4379965  | 80392312 | rs4312196  | 0.718 |
| 13 | 80391966 | rs4379965  | 80394914 | rs2478216  | 0.696 |
| 13 | 80392312 | rs4312196  | 80394914 | rs2478216  | 0.968 |
| 13 | 88037911 | rs10507973 | 88039407 | rs4483720  | 0.990 |
| 13 | 88037911 | rs10507973 | 88057930 | rs4773046  | 0.263 |
| 13 | 88037911 | rs10507973 | 88067963 | rs1536355  | 0.283 |
| 13 | 88039407 | rs4483720  | 88057930 | rs4773046  | 0.256 |

|    |          |            |          |            |       |
|----|----------|------------|----------|------------|-------|
| 13 | 88039407 | rs4483720  | 88067963 | rs1536355  | 0.275 |
| 13 | 88057930 | rs4773046  | 88067963 | rs1536355  | 0.379 |
| 13 | 88067963 | rs1536355  | 88099356 | rs9521628  | 0.236 |
| 13 | 88067963 | rs1536355  | 88114373 | rs9521690  | 0.247 |
| 13 | 88073196 | rs1326426  | 88099356 | rs9521628  | 0.263 |
| 13 | 88073196 | rs1326426  | 88114373 | rs9521690  | 0.600 |
| 13 | 88099356 | rs9521628  | 88114373 | rs9521690  | 0.453 |
| 13 | 88099356 | rs9521628  | 88471180 | rs11069912 | 0.383 |
| 13 | 88099356 | rs9521628  | 88534365 | rs9522430  | 0.390 |
| 13 | 88471180 | rs11069912 | 88534365 | rs9522430  | 0.979 |
| 13 | 89727003 | rs12867513 | 89727127 | rs9560600  | 1.000 |
| 13 | 91494163 | rs9301773  | 91557014 | rs7993910  | 0.422 |
| 13 | 92516009 | rs696931   | 92521689 | rs1838355  | 0.420 |
| 13 | 92516009 | rs696931   | 92525871 | rs1444231  | 0.662 |
| 13 | 92521689 | rs1838355  | 92525871 | rs1444231  | 0.632 |
| 13 | 94317286 | rs17196506 | 94331307 | rs16950278 | 0.205 |
| 13 | 94341946 | rs9590101  | 94349071 | rs9590106  | 0.834 |
| 13 | 94341946 | rs9590101  | 94349285 | rs9590108  | 0.834 |
| 13 | 94341946 | rs9590101  | 94350366 | rs2148058  | 0.834 |
| 13 | 94341946 | rs9590101  | 94350426 | rs2182263  | 0.803 |
| 13 | 94341946 | rs9590101  | 94351657 | rs9302014  | 0.823 |
| 13 | 94341946 | rs9590101  | 94357429 | rs9561719  | 0.824 |
| 13 | 94349071 | rs9590106  | 94349285 | rs9590108  | 1.000 |
| 13 | 94349071 | rs9590106  | 94350366 | rs2148058  | 1.000 |
| 13 | 94349071 | rs9590106  | 94350426 | rs2182263  | 0.988 |
| 13 | 94349071 | rs9590106  | 94351657 | rs9302014  | 0.987 |
| 13 | 94349071 | rs9590106  | 94357429 | rs9561719  | 0.987 |
| 13 | 94349285 | rs9590108  | 94350366 | rs2148058  | 1.000 |
| 13 | 94349285 | rs9590108  | 94350426 | rs2182263  | 0.988 |
| 13 | 94349285 | rs9590108  | 94351657 | rs9302014  | 0.987 |
| 13 | 94349285 | rs9590108  | 94357429 | rs9561719  | 0.987 |
| 13 | 94350366 | rs2148058  | 94350426 | rs2182263  | 0.988 |
| 13 | 94350366 | rs2148058  | 94351657 | rs9302014  | 0.987 |
| 13 | 94350366 | rs2148058  | 94357429 | rs9561719  | 0.987 |
| 13 | 94350426 | rs2182263  | 94351657 | rs9302014  | 0.975 |
| 13 | 94350426 | rs2182263  | 94357429 | rs9561719  | 0.975 |
| 13 | 94351657 | rs9302014  | 94357429 | rs9561719  | 0.975 |
| 13 | 96443969 | rs9513199  | 96455117 | rs9516802  | 0.305 |
| 13 | 96764269 | rs1316549  | 96805016 | rs6491350  | 0.561 |
| 13 | 98096707 | rs4578508  | 98096810 | rs2184903  | 0.672 |
| 13 | 98096707 | rs4578508  | 98103632 | rs9554486  | 0.781 |
| 13 | 98096707 | rs4578508  | 98113794 | rs4412849  | 0.595 |
| 13 | 98096707 | rs4578508  | 98120753 | rs9557025  | 0.719 |
| 13 | 98096707 | rs4578508  | 98168486 | rs3782999  | 0.363 |

|    |           |            |           |            |       |
|----|-----------|------------|-----------|------------|-------|
| 13 | 98096810  | rs2184903  | 98103632  | rs9554486  | 0.774 |
| 13 | 98096810  | rs2184903  | 98113794  | rs4412849  | 0.899 |
| 13 | 98096810  | rs2184903  | 98120753  | rs9557025  | 0.724 |
| 13 | 98096810  | rs2184903  | 98168486  | rs3782999  | 0.404 |
| 13 | 98103632  | rs9554486  | 98113794  | rs4412849  | 0.733 |
| 13 | 98103632  | rs9554486  | 98120753  | rs9557025  | 0.903 |
| 13 | 98103632  | rs9554486  | 98168486  | rs3782999  | 0.415 |
| 13 | 98113794  | rs4412849  | 98120753  | rs9557025  | 0.788 |
| 13 | 98113794  | rs4412849  | 98168486  | rs3782999  | 0.376 |
| 13 | 98120753  | rs9557025  | 98168486  | rs3782999  | 0.409 |
| 13 | 98953078  | rs4772214  | 98988505  | rs9585118  | 0.985 |
| 13 | 98953078  | rs4772214  | 99003333  | rs9585127  | 0.944 |
| 13 | 98953078  | rs4772214  | 99065193  | rs9554617  | 0.310 |
| 13 | 98988505  | rs9585118  | 99003333  | rs9585127  | 0.929 |
| 13 | 98988505  | rs9585118  | 99065193  | rs9554617  | 0.304 |
| 13 | 99003333  | rs9585127  | 99065193  | rs9554617  | 0.321 |
| 13 | 101721943 | rs1360985  | 101724665 | rs1415057  | 0.936 |
| 13 | 101721943 | rs1360985  | 101752488 | rs1336664  | 0.938 |
| 13 | 101724665 | rs1415057  | 101752488 | rs1336664  | 0.948 |
| 13 | 102413583 | rs701559   | 102430390 | rs7322528  | 0.762 |
| 13 | 103334252 | rs9558198  | 103347771 | rs16963727 | 0.882 |
| 13 | 103914442 | rs7322187  | 103914702 | rs9586517  | 1.000 |
| 13 | 103914442 | rs7322187  | 103921100 | rs9514269  | 0.303 |
| 13 | 103914442 | rs7322187  | 103933101 | rs9300934  | 0.587 |
| 13 | 103914442 | rs7322187  | 103938575 | rs9582875  | 0.595 |
| 13 | 103914702 | rs9586517  | 103921100 | rs9514269  | 0.303 |
| 13 | 103914702 | rs9586517  | 103933101 | rs9300934  | 0.587 |
| 13 | 103914702 | rs9586517  | 103938575 | rs9582875  | 0.595 |
| 13 | 103921100 | rs9514269  | 103933101 | rs9300934  | 0.464 |
| 13 | 103921100 | rs9514269  | 103938575 | rs9582875  | 0.421 |
| 13 | 103933101 | rs9300934  | 103938575 | rs9582875  | 0.890 |
| 13 | 103933101 | rs9300934  | 104019769 | rs9519381  | 0.228 |
| 13 | 103938575 | rs9582875  | 104019769 | rs9519381  | 0.220 |
| 13 | 104515664 | rs7139453  | 104515799 | rs7316970  | 0.912 |
| 13 | 104954122 | rs11618600 | 104968003 | rs1981272  | 0.737 |
| 13 | 105159394 | rs4523809  | 105159963 | rs9519746  | 1.000 |
| 13 | 105939350 | rs7328698  | 105939434 | rs7328882  | 0.898 |
| 13 | 106615670 | rs4772857  | 106618191 | rs1927767  | 0.281 |
| 13 | 110090045 | rs7394     | 110104108 | rs445490   | 0.225 |
| 13 | 110252125 | rs7323834  | 110254929 | rs7319972  | 0.947 |
| 13 | 110455200 | rs7317887  | 110466673 | rs8000668  | 0.234 |
| 13 | 112080916 | rs7324712  | 112101471 | rs10816    | 0.621 |
| 13 | 112080916 | rs7324712  | 112101811 | rs9550070  | 0.439 |
| 13 | 112101471 | rs10816    | 112101811 | rs9550070  | 0.784 |

|    |           |            |           |            |       |
|----|-----------|------------|-----------|------------|-------|
| 13 | 112199342 | rs4907533  | 112273716 | rs9577814  | 0.562 |
| 13 | 113941987 | rs9590464  | 113968129 | rs7983955  | 0.557 |
| 14 | 19957802  | rs1760955  | 19961438  | rs12436843 | 0.453 |
| 14 | 21536574  | rs932230   | 21536724  | rs932231   | 0.648 |
| 14 | 21784072  | rs4981415  | 21784363  | rs11157474 | 0.299 |
| 14 | 24498867  | rs17109366 | 24536305  | rs17109462 | 0.247 |
| 14 | 24498867  | rs17109366 | 24538105  | rs10151968 | 0.671 |
| 14 | 24536305  | rs17109462 | 24538105  | rs10151968 | 0.314 |
| 14 | 29748277  | rs17096419 | 29749441  | rs11629275 | 1.000 |
| 14 | 33312734  | rs8017055  | 33316845  | rs12895061 | 0.274 |
| 14 | 36159780  | rs11622332 | 36190727  | rs6571755  | 0.743 |
| 14 | 37714254  | rs2415456  | 37715384  | rs2415458  | 0.926 |
| 14 | 37714254  | rs2415456  | 37715734  | rs2899868  | 0.926 |
| 14 | 37714254  | rs2415456  | 37717436  | rs10147944 | 0.914 |
| 14 | 37715384  | rs2415458  | 37715734  | rs2899868  | 1.000 |
| 14 | 37715384  | rs2415458  | 37717436  | rs10147944 | 0.987 |
| 14 | 37715734  | rs2899868  | 37717436  | rs10147944 | 0.987 |
| 14 | 38958523  | rs4902622  | 39013292  | rs2057137  | 0.600 |
| 14 | 39935520  | rs4903754  | 39949725  | rs8181915  | 0.836 |
| 14 | 39998166  | rs7156053  | 40094252  | rs12587411 | 0.928 |
| 14 | 41290670  | rs4304945  | 41414572  | rs2031271  | 0.231 |
| 14 | 41290670  | rs4304945  | 41443589  | rs17181811 | 0.384 |
| 14 | 41290670  | rs4304945  | 41514751  | rs1684689  | 0.399 |
| 14 | 41290670  | rs4304945  | 41598712  | rs1763302  | 0.316 |
| 14 | 41414572  | rs2031271  | 41443589  | rs17181811 | 0.566 |
| 14 | 41414572  | rs2031271  | 41514751  | rs1684689  | 0.604 |
| 14 | 41414572  | rs2031271  | 41598712  | rs1763302  | 0.458 |
| 14 | 41443589  | rs17181811 | 41514751  | rs1684689  | 0.901 |
| 14 | 41443589  | rs17181811 | 41598712  | rs1763302  | 0.701 |
| 14 | 41514751  | rs1684689  | 41598712  | rs1763302  | 0.792 |
| 14 | 43427391  | rs1952381  | 43604910  | rs7153093  | 0.279 |
| 14 | 45457913  | rs12148021 | 45505234  | rs762015   | 0.538 |
| 14 | 45457913  | rs12148021 | 45521429  | rs1951317  | 0.799 |
| 14 | 45457913  | rs12148021 | 45564779  | rs11849729 | 0.612 |
| 14 | 45457913  | rs12148021 | 45565893  | rs9805956  | 0.782 |
| 14 | 45457913  | rs12148021 | 45567885  | rs1957190  | 0.673 |
| 14 | 45457913  | rs12148021 | 45575579  | rs4491418  | 0.789 |
| 14 | 45457913  | rs12148021 | 45580798  | rs1957187  | 0.715 |
| 14 | 45505234  | rs762015   | 45521429  | rs1951317  | 0.557 |
| 14 | 45505234  | rs762015   | 45564779  | rs11849729 | 0.846 |
| 14 | 45505234  | rs762015   | 45565893  | rs9805956  | 0.560 |
| 14 | 45505234  | rs762015   | 45567885  | rs1957190  | 0.724 |
| 14 | 45505234  | rs762015   | 45575579  | rs4491418  | 0.544 |
| 14 | 45505234  | rs762015   | 45580798  | rs1957187  | 0.754 |

|    |          |            |          |            |       |
|----|----------|------------|----------|------------|-------|
| 14 | 45521429 | rs1951317  | 45564779 | rs11849729 | 0.450 |
| 14 | 45521429 | rs1951317  | 45565893 | rs9805956  | 0.749 |
| 14 | 45521429 | rs1951317  | 45567885 | rs1957190  | 0.628 |
| 14 | 45521429 | rs1951317  | 45575579 | rs4491418  | 0.991 |
| 14 | 45521429 | rs1951317  | 45580798 | rs1957187  | 0.548 |
| 14 | 45564779 | rs11849729 | 45565893 | rs9805956  | 0.628 |
| 14 | 45564779 | rs11849729 | 45567885 | rs1957190  | 0.800 |
| 14 | 45564779 | rs11849729 | 45575579 | rs4491418  | 0.438 |
| 14 | 45564779 | rs11849729 | 45580798 | rs1957187  | 0.877 |
| 14 | 45565893 | rs9805956  | 45567885 | rs1957190  | 0.808 |
| 14 | 45565893 | rs9805956  | 45575579 | rs4491418  | 0.738 |
| 14 | 45565893 | rs9805956  | 45580798 | rs1957187  | 0.715 |
| 14 | 45567885 | rs1957190  | 45575579 | rs4491418  | 0.616 |
| 14 | 45567885 | rs1957190  | 45580798 | rs1957187  | 0.908 |
| 14 | 45575579 | rs4491418  | 45580798 | rs1957187  | 0.536 |
| 14 | 49029992 | rs10483556 | 49038646 | rs8009047  | 0.678 |
| 14 | 49038646 | rs8009047  | 49056851 | rs7145941  | 0.244 |
| 14 | 51806327 | rs4901265  | 51806518 | rs4898758  | 0.983 |
| 14 | 52886261 | rs1255320  | 52898072 | rs1255281  | 0.873 |
| 14 | 55624732 | rs17090962 | 55624828 | rs17090964 | 1.000 |
| 14 | 56307190 | rs12435979 | 56307786 | rs12436671 | 0.883 |
| 14 | 56307786 | rs12436671 | 56312173 | rs198228   | 0.239 |
| 14 | 57000298 | rs8021033  | 57000360 | rs8021172  | 1.000 |
| 14 | 57000298 | rs8021033  | 57018133 | rs1152522  | 0.691 |
| 14 | 57000298 | rs8021033  | 57068620 | rs17795775 | 0.348 |
| 14 | 57000360 | rs8021172  | 57018133 | rs1152522  | 0.691 |
| 14 | 57000360 | rs8021172  | 57068620 | rs17795775 | 0.348 |
| 14 | 57018133 | rs1152522  | 57068620 | rs17795775 | 0.244 |
| 14 | 57429212 | rs17093847 | 57429606 | rs17093849 | 1.000 |
| 14 | 58447201 | rs177727   | 58475842 | rs10141742 | 0.341 |
| 14 | 58447201 | rs177727   | 58494767 | rs2882029  | 0.910 |
| 14 | 58475842 | rs10141742 | 58494767 | rs2882029  | 0.394 |
| 14 | 58740427 | rs17095853 | 58767499 | rs17833810 | 0.337 |
| 14 | 58740427 | rs17095853 | 58794834 | rs17095965 | 0.747 |
| 14 | 58740427 | rs17095853 | 58810870 | rs17096006 | 0.688 |
| 14 | 58740427 | rs17095853 | 58817716 | rs7155203  | 0.699 |
| 14 | 58740427 | rs17095853 | 58820238 | rs8181987  | 0.628 |
| 14 | 58794834 | rs17095965 | 58810870 | rs17096006 | 0.918 |
| 14 | 58794834 | rs17095965 | 58817716 | rs7155203  | 0.871 |
| 14 | 58794834 | rs17095965 | 58820238 | rs8181987  | 0.862 |
| 14 | 58810870 | rs17096006 | 58817716 | rs7155203  | 0.956 |
| 14 | 58810870 | rs17096006 | 58820238 | rs8181987  | 0.921 |
| 14 | 58817716 | rs7155203  | 58820238 | rs8181987  | 0.914 |
| 14 | 59219012 | rs2182140  | 59496656 | rs10483722 | 0.216 |



|    |          |            |          |            |       |
|----|----------|------------|----------|------------|-------|
| 14 | 59385633 | rs12897336 | 59394703 | rs17310036 | 0.986 |
| 14 | 59385633 | rs12897336 | 59496656 | rs10483722 | 0.846 |
| 14 | 59394703 | rs17310036 | 59496656 | rs10483722 | 0.835 |
| 14 | 59758931 | rs188620   | 59818533 | rs12323784 | 0.623 |
| 14 | 60101037 | rs10150234 | 60195789 | rs4899015  | 0.376 |
| 14 | 60101037 | rs10150234 | 60228623 | rs1018457  | 0.204 |
| 14 | 60101037 | rs10150234 | 60486215 | rs2882684  | 0.210 |
| 14 | 60228623 | rs1018457  | 60486215 | rs2882684  | 0.684 |
| 14 | 61003344 | rs912618   | 61108248 | rs798788   | 0.273 |
| 14 | 61100961 | rs2105073  | 61108248 | rs798788   | 0.504 |
| 14 | 62711170 | rs7152965  | 62748675 | rs762102   | 0.470 |
| 14 | 63478768 | rs9323443  | 63483936 | rs1262235  | 0.956 |
| 14 | 63604909 | rs1255971  | 63631077 | rs17101651 | 0.228 |
| 14 | 65539347 | rs1147441  | 65587002 | rs1838332  | 0.224 |
| 14 | 65824990 | rs8005105  | 65956469 | rs8020532  | 0.650 |
| 14 | 65824990 | rs8005105  | 66322788 | rs8022328  | 0.628 |
| 14 | 65956469 | rs8020532  | 66322788 | rs8022328  | 0.834 |
| 14 | 67902720 | rs8018477  | 67914548 | rs1885014  | 0.972 |
| 14 | 67902720 | rs8018477  | 67944813 | rs3784119  | 0.584 |
| 14 | 67914548 | rs1885014  | 67944813 | rs3784119  | 0.572 |
| 14 | 68622880 | rs9323521  | 68630946 | rs2001355  | 0.751 |
| 14 | 69599208 | rs149250   | 69617703 | rs12883784 | 0.959 |
| 14 | 69605628 | rs150951   | 69605652 | rs150950   | 1.000 |
| 14 | 69605628 | rs150951   | 69605686 | rs150949   | 1.000 |
| 14 | 69605628 | rs150951   | 69605873 | rs150948   | 1.000 |
| 14 | 69605652 | rs150950   | 69605686 | rs150949   | 1.000 |
| 14 | 69605652 | rs150950   | 69605873 | rs150948   | 1.000 |
| 14 | 69605686 | rs150949   | 69605873 | rs150948   | 1.000 |
| 14 | 70302669 | rs4902852  | 70344430 | rs7155910  | 0.443 |
| 14 | 72047594 | rs7161176  | 72077931 | rs11628539 | 0.507 |
| 14 | 74235578 | rs4899530  | 74236246 | rs6574189  | 1.000 |
| 14 | 74235578 | rs4899530  | 74237459 | rs17782683 | 0.382 |
| 14 | 74235578 | rs4899530  | 74435482 | rs732765   | 0.710 |
| 14 | 74236246 | rs6574189  | 74237459 | rs17782683 | 0.380 |
| 14 | 74236246 | rs6574189  | 74435482 | rs732765   | 0.709 |
| 14 | 74237459 | rs17782683 | 74435482 | rs732765   | 0.304 |
| 14 | 74899937 | rs12590700 | 74901110 | rs8006018  | 0.367 |
| 14 | 75683431 | rs935334   | 75727223 | rs1900125  | 1.000 |
| 14 | 78499684 | rs31420    | 78500348 | rs17108429 | 0.565 |
| 14 | 79161922 | rs221492   | 79837480 | rs9989235  | 0.201 |
| 14 | 79743567 | rs2267873  | 79813376 | rs2295138  | 0.434 |
| 14 | 79743567 | rs2267873  | 79837480 | rs9989235  | 0.572 |
| 14 | 79743567 | rs2267873  | 79841000 | rs2160355  | 0.424 |
| 14 | 79813376 | rs2295138  | 79837480 | rs9989235  | 0.355 |

|    |           |            |           |            |       |
|----|-----------|------------|-----------|------------|-------|
| 14 | 79813376  | rs2295138  | 79841000  | rs2160355  | 0.979 |
| 14 | 79837480  | rs9989235  | 79841000  | rs2160355  | 0.333 |
| 14 | 83979059  | rs8006640  | 83981301  | rs12883344 | 1.000 |
| 14 | 85288372  | rs12897255 | 85291664  | rs17730580 | 0.921 |
| 14 | 85288372  | rs12897255 | 85306119  | rs8003269  | 0.607 |
| 14 | 85288372  | rs12897255 | 85321268  | rs17736583 | 0.825 |
| 14 | 85288372  | rs12897255 | 85335323  | rs11851223 | 0.748 |
| 14 | 85291664  | rs17730580 | 85306119  | rs8003269  | 0.562 |
| 14 | 85291664  | rs17730580 | 85321268  | rs17736583 | 0.883 |
| 14 | 85291664  | rs17730580 | 85335323  | rs11851223 | 0.773 |
| 14 | 85306119  | rs8003269  | 85321268  | rs17736583 | 0.575 |
| 14 | 85306119  | rs8003269  | 85335323  | rs11851223 | 0.649 |
| 14 | 85321268  | rs17736583 | 85335323  | rs11851223 | 0.870 |
| 14 | 85796095  | rs2135102  | 85796535  | rs4899891  | 1.000 |
| 14 | 85796095  | rs2135102  | 85813242  | rs1505163  | 0.934 |
| 14 | 85796095  | rs2135102  | 85817489  | rs7144626  | 0.853 |
| 14 | 85796535  | rs4899891  | 85813242  | rs1505163  | 0.934 |
| 14 | 85796535  | rs4899891  | 85817489  | rs7144626  | 0.853 |
| 14 | 85813242  | rs1505163  | 85817489  | rs7144626  | 0.918 |
| 14 | 92140517  | rs11628803 | 92142022  | rs2146498  | 0.973 |
| 14 | 93846154  | rs11160168 | 93875164  | rs1950654  | 0.685 |
| 14 | 93846154  | rs11160168 | 93908993  | rs1016686  | 0.435 |
| 14 | 93846154  | rs11160168 | 93911394  | rs1243167  | 0.411 |
| 14 | 93875164  | rs1950654  | 93908993  | rs1016686  | 0.563 |
| 14 | 93875164  | rs1950654  | 93911394  | rs1243167  | 0.535 |
| 14 | 93908993  | rs1016686  | 93911394  | rs1243167  | 0.911 |
| 14 | 94019874  | rs8008729  | 94020846  | rs12589932 | 0.664 |
| 14 | 94019874  | rs8008729  | 94026811  | rs4900233  | 0.598 |
| 14 | 94019874  | rs8008729  | 94033174  | rs8012043  | 0.267 |
| 14 | 94020846  | rs12589932 | 94026811  | rs4900233  | 0.933 |
| 14 | 94020846  | rs12589932 | 94033174  | rs8012043  | 0.445 |
| 14 | 94026811  | rs4900233  | 94033174  | rs8012043  | 0.436 |
| 14 | 95247926  | rs2296311  | 95251335  | rs1984968  | 0.903 |
| 14 | 95518120  | rs11628024 | 95526439  | rs2369415  | 0.854 |
| 14 | 95518120  | rs11628024 | 95560098  | rs10149056 | 0.838 |
| 14 | 95526439  | rs2369415  | 95560098  | rs10149056 | 0.949 |
| 14 | 97689215  | rs17096516 | 97697068  | rs17096556 | 0.842 |
| 14 | 97775389  | rs4900391  | 97815629  | rs11846788 | 0.463 |
| 14 | 97833989  | rs8022910  | 97834528  | rs7142106  | 0.584 |
| 14 | 98039917  | rs8003296  | 98057225  | rs8022320  | 0.917 |
| 14 | 102481588 | rs911627   | 102482021 | rs2403107  | 0.576 |
| 15 | 21779413  | rs1459963  | 21780108  | rs996956   | 0.969 |
| 15 | 23600150  | rs4906777  | 23604395  | rs17642892 | 0.495 |
| 15 | 23600150  | rs4906777  | 23605988  | rs8041836  | 0.470 |

|    |          |            |          |            |       |
|----|----------|------------|----------|------------|-------|
| 15 | 23604395 | rs17642892 | 23605988 | rs8041836  | 0.942 |
| 15 | 24625888 | rs8032341  | 24632266 | rs7402786  | 0.314 |
| 15 | 25763768 | rs12592307 | 25774538 | rs768547   | 0.876 |
| 15 | 27025631 | rs12324794 | 27391874 | rs1025989  | 0.301 |
| 15 | 27391874 | rs1025989  | 27395970 | rs1373891  | 0.547 |
| 15 | 27547808 | rs16955485 | 27556480 | rs10851966 | 0.724 |
| 15 | 27547808 | rs16955485 | 27562437 | rs11073050 | 0.873 |
| 15 | 27556480 | rs10851966 | 27562437 | rs11073050 | 0.743 |
| 15 | 29324938 | rs17228227 | 29332325 | rs17815905 | 0.865 |
| 15 | 29883581 | rs905434   | 29884283 | rs905438   | 0.865 |
| 15 | 29883581 | rs905434   | 29891656 | rs7171443  | 0.774 |
| 15 | 29883581 | rs905434   | 29893943 | rs7182228  | 0.640 |
| 15 | 29883581 | rs905434   | 29912376 | rs2879291  | 0.504 |
| 15 | 29883581 | rs905434   | 29918313 | rs17604644 | 0.853 |
| 15 | 29884283 | rs905438   | 29891656 | rs7171443  | 0.742 |
| 15 | 29884283 | rs905438   | 29893943 | rs7182228  | 0.615 |
| 15 | 29884283 | rs905438   | 29912376 | rs2879291  | 0.466 |
| 15 | 29884283 | rs905438   | 29918313 | rs17604644 | 0.990 |
| 15 | 29891656 | rs7171443  | 29893943 | rs7182228  | 0.877 |
| 15 | 29891656 | rs7171443  | 29912376 | rs2879291  | 0.783 |
| 15 | 29891656 | rs7171443  | 29918313 | rs17604644 | 0.757 |
| 15 | 29893943 | rs7182228  | 29912376 | rs2879291  | 0.868 |
| 15 | 29893943 | rs7182228  | 29918313 | rs17604644 | 0.627 |
| 15 | 29912376 | rs2879291  | 29918313 | rs17604644 | 0.475 |
| 15 | 32841217 | rs2196562  | 32849069 | rs1521849  | 0.209 |
| 15 | 33550949 | rs17586323 | 33554579 | rs958384   | 1.000 |
| 15 | 33550949 | rs17586323 | 33624589 | rs8024137  | 0.826 |
| 15 | 33554579 | rs958384   | 33624589 | rs8024137  | 0.826 |
| 15 | 36654501 | rs12324139 | 36654582 | rs12324161 | 0.991 |
| 15 | 42803897 | rs6493111  | 42843424 | rs3100141  | 0.423 |
| 15 | 43337949 | rs11637838 | 43339048 | rs8039354  | 1.000 |
| 15 | 43337949 | rs11637838 | 43344121 | rs11631021 | 0.545 |
| 15 | 43337949 | rs11637838 | 43346560 | rs11639420 | 1.000 |
| 15 | 43337949 | rs11637838 | 43388704 | rs11636114 | 0.911 |
| 15 | 43337949 | rs11637838 | 43516029 | rs2453518  | 0.317 |
| 15 | 43339048 | rs8039354  | 43344121 | rs11631021 | 0.545 |
| 15 | 43339048 | rs8039354  | 43346560 | rs11639420 | 1.000 |
| 15 | 43339048 | rs8039354  | 43388704 | rs11636114 | 0.911 |
| 15 | 43339048 | rs8039354  | 43516029 | rs2453518  | 0.317 |
| 15 | 43344121 | rs11631021 | 43346560 | rs11639420 | 0.545 |
| 15 | 43344121 | rs11631021 | 43388704 | rs11636114 | 0.457 |
| 15 | 43346560 | rs11639420 | 43388704 | rs11636114 | 0.911 |
| 15 | 43346560 | rs11639420 | 43516029 | rs2453518  | 0.317 |
| 15 | 43388704 | rs11636114 | 43516029 | rs2453518  | 0.367 |

|    |          |            |          |            |       |
|----|----------|------------|----------|------------|-------|
| 15 | 44023436 | rs16949297 | 44030019 | rs6493188  | 0.927 |
| 15 | 45541604 | rs1390870  | 45584167 | rs12908208 | 0.954 |
| 15 | 46999340 | rs4381535  | 47007244 | rs4303430  | 0.330 |
| 15 | 50500938 | rs17614119 | 50652177 | rs8034728  | 0.234 |
| 15 | 52310314 | rs8023723  | 52320735 | rs12439702 | 0.779 |
| 15 | 55046028 | rs12900986 | 55201068 | rs967514   | 0.645 |
| 15 | 58460982 | rs9920861  | 58461141 | rs9920823  | 0.907 |
| 15 | 60578048 | rs16945167 | 60581199 | rs885188   | 0.366 |
| 15 | 61615616 | rs8025240  | 61675548 | rs4074448  | 0.750 |
| 15 | 65272210 | rs12595334 | 65440030 | rs8042007  | 0.975 |
| 15 | 67263598 | rs12438916 | 67288438 | rs4777125  | 0.707 |
| 15 | 69537817 | rs991051   | 69540196 | rs12912393 | 0.964 |
| 15 | 69791262 | rs1604335  | 69804834 | rs17737569 | 0.462 |
| 15 | 70235165 | rs16956602 | 70332911 | rs3803388  | 1.000 |
| 15 | 70864255 | rs2278543  | 70909026 | rs4514651  | 0.395 |
| 15 | 78880032 | rs11633017 | 78880943 | rs748696   | 0.250 |
| 15 | 83294136 | rs896368   | 83294367 | rs896370   | 1.000 |
| 15 | 83814605 | rs7168345  | 83824542 | rs12913754 | 0.322 |
| 15 | 83814605 | rs7168345  | 83860275 | rs11637726 | 0.224 |
| 15 | 83814605 | rs7168345  | 83864137 | rs4842888  | 0.584 |
| 15 | 83814605 | rs7168345  | 83865972 | rs3743321  | 0.580 |
| 15 | 83814605 | rs7168345  | 83871692 | rs6496055  | 0.537 |
| 15 | 83824542 | rs12913754 | 83860275 | rs11637726 | 0.813 |
| 15 | 83824542 | rs12913754 | 83864137 | rs4842888  | 0.213 |
| 15 | 83824542 | rs12913754 | 83865972 | rs3743321  | 0.210 |
| 15 | 83824542 | rs12913754 | 83871692 | rs6496055  | 0.215 |
| 15 | 83824542 | rs12913754 | 84034374 | rs17574774 | 0.426 |
| 15 | 83860275 | rs11637726 | 83864137 | rs4842888  | 0.285 |
| 15 | 83860275 | rs11637726 | 83865972 | rs3743321  | 0.283 |
| 15 | 83860275 | rs11637726 | 83871692 | rs6496055  | 0.288 |
| 15 | 83860275 | rs11637726 | 84034374 | rs17574774 | 0.531 |
| 15 | 83864137 | rs4842888  | 83865972 | rs3743321  | 1.000 |
| 15 | 83864137 | rs4842888  | 83871692 | rs6496055  | 0.936 |
| 15 | 83865972 | rs3743321  | 83871692 | rs6496055  | 0.935 |
| 15 | 84393542 | rs4887511  | 84415671 | rs11630546 | 0.594 |
| 15 | 84756735 | rs1835629  | 84865093 | rs12591257 | 0.813 |
| 15 | 84815653 | rs7174126  | 84815973 | rs9920671  | 0.944 |
| 15 | 86204840 | rs1560977  | 86205395 | rs3803409  | 0.940 |
| 15 | 87790545 | rs11073865 | 87790819 | rs11073866 | 0.903 |
| 15 | 87943291 | rs8039002  | 87969112 | rs894157   | 0.874 |
| 15 | 89918244 | rs8028098  | 89962969 | rs12148290 | 0.207 |
| 15 | 90571510 | rs12440538 | 90573772 | rs11632145 | 1.000 |
| 15 | 94583487 | rs1964412  | 94589026 | rs11856264 | 0.849 |
| 15 | 97921908 | rs4424892  | 98065263 | rs325406   | 0.312 |

|    |          |            |          |            |       |
|----|----------|------------|----------|------------|-------|
| 16 | 932301   | rs1465761  | 947764   | rs12595929 | 0.388 |
| 16 | 4379210  | rs11646063 | 4508770  | rs4786509  | 0.348 |
| 16 | 4379210  | rs11646063 | 4509441  | rs11076837 | 0.348 |
| 16 | 4508770  | rs4786509  | 4509441  | rs11076837 | 1.000 |
| 16 | 5775884  | rs9926798  | 5790794  | rs8059231  | 0.316 |
| 16 | 6328800  | rs1833157  | 6331875  | rs1640881  | 0.436 |
| 16 | 6328800  | rs1833157  | 6340689  | rs11642627 | 0.977 |
| 16 | 6328800  | rs1833157  | 6348155  | rs17527108 | 0.356 |
| 16 | 6331875  | rs1640881  | 6340689  | rs11642627 | 0.430 |
| 16 | 6331875  | rs1640881  | 6348155  | rs17527108 | 0.456 |
| 16 | 6340689  | rs11642627 | 6348155  | rs17527108 | 0.352 |
| 16 | 7531196  | rs12596133 | 7531546  | rs1507027  | 0.628 |
| 16 | 7531196  | rs12596133 | 7533576  | rs6500981  | 0.645 |
| 16 | 7531546  | rs1507027  | 7533576  | rs6500981  | 0.386 |
| 16 | 7559278  | rs7197594  | 7562377  | rs11641648 | 0.981 |
| 16 | 7559278  | rs7197594  | 7565512  | rs7190440  | 0.206 |
| 16 | 7559278  | rs7197594  | 7567099  | rs11648790 | 0.231 |
| 16 | 7562377  | rs11641648 | 7565512  | rs7190440  | 0.202 |
| 16 | 7562377  | rs11641648 | 7567099  | rs11648790 | 0.226 |
| 16 | 7565512  | rs7190440  | 7567099  | rs11648790 | 0.944 |
| 16 | 8538548  | rs4074769  | 8544856  | rs9925238  | 0.599 |
| 16 | 9552891  | rs9932623  | 9553178  | rs9932870  | 0.931 |
| 16 | 9714028  | rs12917871 | 9715998  | rs8062216  | 0.944 |
| 16 | 9714028  | rs12917871 | 9716455  | rs6497420  | 0.944 |
| 16 | 9714028  | rs12917871 | 9716477  | rs6497421  | 0.944 |
| 16 | 9715998  | rs8062216  | 9716455  | rs6497420  | 1.000 |
| 16 | 9715998  | rs8062216  | 9716477  | rs6497421  | 1.000 |
| 16 | 9716455  | rs6497420  | 9716477  | rs6497421  | 1.000 |
| 16 | 9740694  | rs17749793 | 9758623  | rs8045712  | 0.785 |
| 16 | 10016159 | rs11866385 | 10044390 | rs11074547 | 0.218 |
| 16 | 10016159 | rs11866385 | 10153982 | rs6497732  | 0.261 |
| 16 | 10019403 | rs837696   | 10044390 | rs11074547 | 0.626 |
| 16 | 10153982 | rs6497732  | 10187517 | rs1071504  | 0.469 |
| 16 | 10947194 | rs12598008 | 10999062 | rs8055544  | 0.846 |
| 16 | 13428953 | rs9989415  | 13432639 | rs7199289  | 0.883 |
| 16 | 13428953 | rs9989415  | 13495836 | rs16962155 | 0.220 |
| 16 | 13432639 | rs7199289  | 13495836 | rs16962155 | 0.256 |
| 16 | 13495836 | rs16962155 | 13545495 | rs16962265 | 0.219 |
| 16 | 19237604 | rs8052275  | 19237689 | rs8051268  | 1.000 |
| 16 | 19237604 | rs8052275  | 19239195 | rs2027818  | 1.000 |
| 16 | 19237604 | rs8052275  | 19239238 | rs2027819  | 0.938 |
| 16 | 19237689 | rs8051268  | 19239195 | rs2027818  | 1.000 |
| 16 | 19237689 | rs8051268  | 19239238 | rs2027819  | 0.938 |
| 16 | 19239195 | rs2027818  | 19239238 | rs2027819  | 0.938 |

|    |          |            |          |            |       |
|----|----------|------------|----------|------------|-------|
| 16 | 22139927 | rs6497580  | 22284504 | rs4468604  | 0.480 |
| 16 | 23633222 | rs17807642 | 23647489 | rs192188   | 0.276 |
| 16 | 26006106 | rs11074748 | 26007616 | rs4520841  | 0.886 |
| 16 | 26870497 | rs4638587  | 26915707 | rs9674123  | 0.479 |
| 16 | 26870497 | rs4638587  | 26918208 | rs11646543 | 0.479 |
| 16 | 26870497 | rs4638587  | 26919173 | rs16976487 | 0.479 |
| 16 | 26915707 | rs9674123  | 26918208 | rs11646543 | 1.000 |
| 16 | 26915707 | rs9674123  | 26919173 | rs16976487 | 1.000 |
| 16 | 26918208 | rs11646543 | 26919173 | rs16976487 | 1.000 |
| 16 | 26982794 | rs12926642 | 26982895 | rs12927904 | 1.000 |
| 16 | 27089322 | rs17638800 | 27089979 | rs8045153  | 1.000 |
| 16 | 34240588 | rs2623779  | 34679872 | rs8054993  | 0.534 |
| 16 | 48077446 | rs193915   | 48078375 | rs193910   | 0.955 |
| 16 | 48178188 | rs7204390  | 48178489 | rs1420683  | 0.822 |
| 16 | 48781884 | rs8057842  | 48817077 | rs4490002  | 0.658 |
| 16 | 49271530 | rs7202124  | 49280575 | rs1981760  | 0.772 |
| 16 | 49271530 | rs7202124  | 49281588 | rs9933594  | 0.772 |
| 16 | 49271530 | rs7202124  | 49282290 | rs4785448  | 0.817 |
| 16 | 49271530 | rs7202124  | 49308676 | rs751271   | 0.529 |
| 16 | 49280575 | rs1981760  | 49281588 | rs9933594  | 1.000 |
| 16 | 49280575 | rs1981760  | 49282290 | rs4785448  | 0.873 |
| 16 | 49280575 | rs1981760  | 49303084 | rs1861759  | 0.228 |
| 16 | 49280575 | rs1981760  | 49308676 | rs751271   | 0.575 |
| 16 | 49281588 | rs9933594  | 49282290 | rs4785448  | 0.873 |
| 16 | 49281588 | rs9933594  | 49303084 | rs1861759  | 0.228 |
| 16 | 49281588 | rs9933594  | 49308676 | rs751271   | 0.575 |
| 16 | 49282290 | rs4785448  | 49303084 | rs1861759  | 0.205 |
| 16 | 49282290 | rs4785448  | 49308676 | rs751271   | 0.489 |
| 16 | 49303084 | rs1861759  | 49308676 | rs751271   | 0.272 |
| 16 | 51128937 | rs4783780  | 51156689 | rs4784227  | 0.309 |
| 16 | 51128937 | rs4783780  | 51206232 | rs3112609  | 0.386 |
| 16 | 51156689 | rs4784227  | 51206232 | rs3112609  | 0.284 |
| 16 | 53021837 | rs9972796  | 53030284 | rs1420284  | 0.681 |
| 16 | 53866889 | rs7197650  | 53872091 | rs12932846 | 0.337 |
| 16 | 54648394 | rs8051382  | 54690175 | rs2008084  | 0.752 |
| 16 | 54648394 | rs8051382  | 54831387 | rs1382362  | 0.593 |
| 16 | 54690175 | rs2008084  | 54831387 | rs1382362  | 0.501 |
| 16 | 54813457 | rs10521336 | 54819250 | rs11644504 | 0.637 |
| 16 | 56783625 | rs2731757  | 56791457 | rs2731740  | 0.881 |
| 16 | 58124917 | rs7191772  | 58129174 | rs11863562 | 0.801 |
| 16 | 60162149 | rs2407919  | 60187711 | rs8058822  | 0.203 |
| 16 | 61131967 | rs2938719  | 61137678 | rs3011235  | 0.691 |
| 16 | 63378852 | rs1424000  | 63380457 | rs2874148  | 0.216 |
| 16 | 63532702 | rs35164    | 63533057 | rs35162    | 0.986 |

|    |          |            |          |            |       |
|----|----------|------------|----------|------------|-------|
| 16 | 63947553 | rs9939590  | 63963161 | rs9929092  | 0.929 |
| 16 | 64486360 | rs4785875  | 64486648 | rs11075598 | 1.000 |
| 16 | 64701645 | rs12598065 | 64811279 | rs2549491  | 0.214 |
| 16 | 69349418 | rs16970513 | 69364175 | rs4985364  | 0.574 |
| 16 | 69349418 | rs16970513 | 69381134 | rs8060947  | 0.787 |
| 16 | 69349418 | rs16970513 | 69391450 | rs9931380  | 0.592 |
| 16 | 69349418 | rs16970513 | 69606892 | rs6499386  | 0.223 |
| 16 | 69364175 | rs4985364  | 69381134 | rs8060947  | 0.721 |
| 16 | 69364175 | rs4985364  | 69391450 | rs9931380  | 0.664 |
| 16 | 69381134 | rs8060947  | 69391450 | rs9931380  | 0.785 |
| 16 | 70274906 | rs8048210  | 70346331 | rs2036338  | 0.968 |
| 16 | 72259525 | rs8056327  | 72271184 | rs764255   | 0.888 |
| 16 | 72340097 | rs417940   | 72341917 | rs4887925  | 0.275 |
| 16 | 72646583 | rs9932030  | 72656475 | rs8051876  | 0.618 |
| 16 | 74555050 | rs1018097  | 74566842 | rs6564297  | 0.429 |
| 16 | 74555050 | rs1018097  | 74579010 | rs8055817  | 0.734 |
| 16 | 74566842 | rs6564297  | 74579010 | rs8055817  | 0.374 |
| 16 | 74691349 | rs13337655 | 74717773 | rs12149144 | 0.599 |
| 16 | 74691349 | rs13337655 | 74720494 | rs4888477  | 0.546 |
| 16 | 74691349 | rs13337655 | 74720684 | rs4888478  | 0.546 |
| 16 | 74691349 | rs13337655 | 74726944 | rs724246   | 0.534 |
| 16 | 74691349 | rs13337655 | 74757947 | rs10871321 | 0.532 |
| 16 | 74691349 | rs13337655 | 74773650 | rs41526748 | 0.542 |
| 16 | 74691349 | rs13337655 | 74792527 | rs12597760 | 0.433 |
| 16 | 74691349 | rs13337655 | 74793211 | rs3851752  | 0.313 |
| 16 | 74717773 | rs12149144 | 74720494 | rs4888477  | 0.899 |
| 16 | 74717773 | rs12149144 | 74720684 | rs4888478  | 0.899 |
| 16 | 74717773 | rs12149144 | 74726944 | rs724246   | 0.915 |
| 16 | 74717773 | rs12149144 | 74757947 | rs10871321 | 0.874 |
| 16 | 74717773 | rs12149144 | 74773650 | rs41526748 | 0.825 |
| 16 | 74717773 | rs12149144 | 74792527 | rs12597760 | 0.713 |
| 16 | 74717773 | rs12149144 | 74793211 | rs3851752  | 0.543 |
| 16 | 74717773 | rs12149144 | 74793563 | rs11863642 | 0.559 |
| 16 | 74720494 | rs4888477  | 74720684 | rs4888478  | 1.000 |
| 16 | 74720494 | rs4888477  | 74726944 | rs724246   | 0.983 |
| 16 | 74720494 | rs4888477  | 74757947 | rs10871321 | 0.881 |
| 16 | 74720494 | rs4888477  | 74773650 | rs41526748 | 0.831 |
| 16 | 74720494 | rs4888477  | 74792527 | rs12597760 | 0.722 |
| 16 | 74720494 | rs4888477  | 74793211 | rs3851752  | 0.572 |
| 16 | 74720494 | rs4888477  | 74793563 | rs11863642 | 0.587 |
| 16 | 74720494 | rs4888477  | 74793613 | rs11149879 | 0.733 |
| 16 | 74720684 | rs4888478  | 74726944 | rs724246   | 0.983 |
| 16 | 74720684 | rs4888478  | 74757947 | rs10871321 | 0.881 |
| 16 | 74720684 | rs4888478  | 74773650 | rs41526748 | 0.831 |

|    |          |            |          |            |       |
|----|----------|------------|----------|------------|-------|
| 16 | 74720684 | rs4888478  | 74792527 | rs12597760 | 0.722 |
| 16 | 74720684 | rs4888478  | 74793211 | rs3851752  | 0.572 |
| 16 | 74720684 | rs4888478  | 74793563 | rs11863642 | 0.587 |
| 16 | 74720684 | rs4888478  | 74793613 | rs11149879 | 0.733 |
| 16 | 74720684 | rs4888478  | 74794055 | rs41515248 | 0.737 |
| 16 | 74726944 | rs724246   | 74757947 | rs10871321 | 0.897 |
| 16 | 74726944 | rs724246   | 74773650 | rs41526748 | 0.846 |
| 16 | 74726944 | rs724246   | 74792527 | rs12597760 | 0.736 |
| 16 | 74726944 | rs724246   | 74793211 | rs3851752  | 0.585 |
| 16 | 74726944 | rs724246   | 74793563 | rs11863642 | 0.601 |
| 16 | 74726944 | rs724246   | 74793613 | rs11149879 | 0.747 |
| 16 | 74726944 | rs724246   | 74794055 | rs41515248 | 0.751 |
| 16 | 74726944 | rs724246   | 74794135 | rs4888483  | 0.585 |
| 16 | 74757947 | rs10871321 | 74773650 | rs41526748 | 0.946 |
| 16 | 74757947 | rs10871321 | 74792527 | rs12597760 | 0.826 |
| 16 | 74757947 | rs10871321 | 74793211 | rs3851752  | 0.637 |
| 16 | 74757947 | rs10871321 | 74793563 | rs11863642 | 0.655 |
| 16 | 74757947 | rs10871321 | 74793613 | rs11149879 | 0.837 |
| 16 | 74757947 | rs10871321 | 74794055 | rs41515248 | 0.842 |
| 16 | 74757947 | rs10871321 | 74794135 | rs4888483  | 0.637 |
| 16 | 74757947 | rs10871321 | 74794288 | rs4888484  | 0.637 |
| 16 | 74773650 | rs41526748 | 74792527 | rs12597760 | 0.843 |
| 16 | 74773650 | rs41526748 | 74793211 | rs3851752  | 0.649 |
| 16 | 74773650 | rs41526748 | 74793563 | rs11863642 | 0.665 |
| 16 | 74773650 | rs41526748 | 74793613 | rs11149879 | 0.857 |
| 16 | 74773650 | rs41526748 | 74794055 | rs41515248 | 0.860 |
| 16 | 74773650 | rs41526748 | 74794135 | rs4888483  | 0.649 |
| 16 | 74773650 | rs41526748 | 74794288 | rs4888484  | 0.649 |
| 16 | 74792527 | rs12597760 | 74793211 | rs3851752  | 0.720 |
| 16 | 74792527 | rs12597760 | 74793563 | rs11863642 | 0.738 |
| 16 | 74792527 | rs12597760 | 74793613 | rs11149879 | 0.946 |
| 16 | 74792527 | rs12597760 | 74794055 | rs41515248 | 0.982 |
| 16 | 74792527 | rs12597760 | 74794135 | rs4888483  | 0.720 |
| 16 | 74792527 | rs12597760 | 74794288 | rs4888484  | 0.720 |
| 16 | 74793211 | rs3851752  | 74793563 | rs11863642 | 0.983 |
| 16 | 74793211 | rs3851752  | 74793613 | rs11149879 | 0.767 |
| 16 | 74793211 | rs3851752  | 74794055 | rs41515248 | 0.736 |
| 16 | 74793211 | rs3851752  | 74794135 | rs4888483  | 1.000 |
| 16 | 74793211 | rs3851752  | 74794288 | rs4888484  | 1.000 |
| 16 | 74793563 | rs11863642 | 74793613 | rs11149879 | 0.755 |
| 16 | 74793563 | rs11863642 | 74794055 | rs41515248 | 0.754 |
| 16 | 74793563 | rs11863642 | 74794135 | rs4888483  | 0.983 |
| 16 | 74793563 | rs11863642 | 74794288 | rs4888484  | 0.983 |
| 16 | 74793613 | rs11149879 | 74794055 | rs41515248 | 0.964 |



|    |          |            |          |            |       |
|----|----------|------------|----------|------------|-------|
| 16 | 74793613 | rs11149879 | 74794135 | rs4888483  | 0.767 |
| 16 | 74793613 | rs11149879 | 74794288 | rs4888484  | 0.767 |
| 16 | 74794055 | rs41515248 | 74794135 | rs4888483  | 0.736 |
| 16 | 74794055 | rs41515248 | 74794288 | rs4888484  | 0.736 |
| 16 | 74794135 | rs4888483  | 74794288 | rs4888484  | 1.000 |
| 16 | 77218875 | rs2738577  | 77223653 | rs1981881  | 0.336 |
| 16 | 77218875 | rs2738577  | 77236228 | rs2550626  | 0.245 |
| 16 | 77223653 | rs1981881  | 77236228 | rs2550626  | 0.704 |
| 16 | 78296126 | rs11867049 | 78296335 | rs9941279  | 0.936 |
| 16 | 78296126 | rs11867049 | 78297854 | rs12925930 | 0.926 |
| 16 | 78296126 | rs11867049 | 78298732 | rs10871375 | 0.936 |
| 16 | 78296335 | rs9941279  | 78297854 | rs12925930 | 0.989 |
| 16 | 78296335 | rs9941279  | 78298732 | rs10871375 | 1.000 |
| 16 | 78297854 | rs12925930 | 78298732 | rs10871375 | 0.989 |
| 16 | 80374081 | rs6564919  | 80374523 | rs7192802  | 0.966 |
| 16 | 80374081 | rs6564919  | 80374740 | rs4580153  | 0.966 |
| 16 | 80374523 | rs7192802  | 80374740 | rs4580153  | 1.000 |
| 16 | 80884590 | rs1029637  | 80934373 | rs2317841  | 0.237 |
| 16 | 81851744 | rs8059870  | 81853239 | rs17678609 | 0.926 |
| 16 | 82096406 | rs8056534  | 82097934 | rs4782539  | 0.345 |
| 16 | 85050919 | rs11117502 | 85079091 | rs9929301  | 0.486 |
| 17 | 1018374  | rs11655015 | 1026950  | rs4968174  | 0.387 |
| 17 | 2966475  | rs6502692  | 2981856  | rs7220491  | 0.422 |
| 17 | 12325534 | rs11870286 | 12336944 | rs11654944 | 0.291 |
| 17 | 14461941 | rs16949994 | 14482865 | rs11652573 | 0.223 |
| 17 | 14461941 | rs16949994 | 14519718 | rs11649745 | 0.259 |
| 17 | 14482865 | rs11652573 | 14519718 | rs11649745 | 0.677 |
| 17 | 19486692 | rs4925026  | 19535432 | rs4925041  | 0.930 |
| 17 | 19572507 | rs7214841  | 19586530 | rs887241   | 0.695 |
| 17 | 19937021 | rs11204422 | 20155944 | rs7223476  | 0.340 |
| 17 | 23813398 | rs11080063 | 23815286 | rs4581750  | 0.709 |
| 17 | 28716561 | rs16968252 | 28727436 | rs2347154  | 0.375 |
| 17 | 29353806 | rs4239243  | 29361439 | rs4513143  | 0.443 |
| 17 | 29734011 | rs16969603 | 29734719 | rs11867951 | 0.955 |
| 17 | 29734011 | rs16969603 | 29741828 | rs16969695 | 0.846 |
| 17 | 29734719 | rs11867951 | 29741828 | rs16969695 | 0.887 |
| 17 | 29735833 | rs159304   | 29755162 | rs212498   | 0.216 |
| 17 | 30039109 | rs4795972  | 30050692 | rs4795980  | 0.249 |
| 17 | 30039109 | rs4795972  | 30076771 | rs2240667  | 0.203 |
| 17 | 30050692 | rs4795980  | 30076771 | rs2240667  | 0.489 |
| 17 | 30050692 | rs4795980  | 30092666 | rs4795043  | 0.425 |
| 17 | 30076771 | rs2240667  | 30092666 | rs4795043  | 0.657 |
| 17 | 30820998 | rs4239251  | 30830445 | rs8066132  | 0.746 |
| 17 | 36712002 | rs1001191  | 36725455 | rs12449671 | 0.561 |

|    |          |            |          |            |       |
|----|----------|------------|----------|------------|-------|
| 17 | 38441868 | rs9911630  | 38485428 | rs4793197  | 0.481 |
| 17 | 38441868 | rs9911630  | 38496716 | rs799916   | 0.966 |
| 17 | 38441868 | rs9911630  | 38512575 | rs8176126  | 0.484 |
| 17 | 38441868 | rs9911630  | 38771048 | rs4520874  | 0.482 |
| 17 | 38441868 | rs9911630  | 38773860 | rs4793229  | 0.484 |
| 17 | 38441868 | rs9911630  | 38781683 | rs9646413  | 0.906 |
| 17 | 38441868 | rs9911630  | 38817755 | rs4792990  | 0.226 |
| 17 | 38485428 | rs4793197  | 38496716 | rs799916   | 0.537 |
| 17 | 38485428 | rs4793197  | 38512575 | rs8176126  | 0.990 |
| 17 | 38485428 | rs4793197  | 38771048 | rs4520874  | 0.949 |
| 17 | 38485428 | rs4793197  | 38773860 | rs4793229  | 0.949 |
| 17 | 38485428 | rs4793197  | 38781683 | rs9646413  | 0.491 |
| 17 | 38496716 | rs799916   | 38512575 | rs8176126  | 0.541 |
| 17 | 38496716 | rs799916   | 38771048 | rs4520874  | 0.539 |
| 17 | 38496716 | rs799916   | 38773860 | rs4793229  | 0.541 |
| 17 | 38496716 | rs799916   | 38781683 | rs9646413  | 0.949 |
| 17 | 38512575 | rs8176126  | 38771048 | rs4520874  | 0.959 |
| 17 | 38512575 | rs8176126  | 38773860 | rs4793229  | 0.959 |
| 17 | 38512575 | rs8176126  | 38781683 | rs9646413  | 0.494 |
| 17 | 38771048 | rs4520874  | 38773860 | rs4793229  | 1.000 |
| 17 | 38771048 | rs4520874  | 38781683 | rs9646413  | 0.533 |
| 17 | 38773860 | rs4793229  | 38781683 | rs9646413  | 0.534 |
| 17 | 40487006 | rs4793172  | 40538554 | rs1053733  | 0.649 |
| 17 | 42276896 | rs2083798  | 42276928 | rs2083797  | 0.801 |
| 17 | 42276896 | rs2083798  | 42285344 | rs4968279  | 0.489 |
| 17 | 42276928 | rs2083797  | 42285344 | rs4968279  | 0.369 |
| 17 | 43255967 | rs17035    | 43599947 | rs16953235 | 0.267 |
| 17 | 43595262 | rs2021752  | 43610091 | rs3792692  | 1.000 |
| 17 | 43595262 | rs2021752  | 43616538 | rs3897986  | 0.929 |
| 17 | 43595262 | rs2021752  | 43620432 | rs2305433  | 0.929 |
| 17 | 43610091 | rs3792692  | 43616538 | rs3897986  | 0.929 |
| 17 | 43610091 | rs3792692  | 43620432 | rs2305433  | 0.929 |
| 17 | 43616538 | rs3897986  | 43620432 | rs2305433  | 1.000 |
| 17 | 47584392 | rs16951051 | 47655029 | rs10514999 | 0.438 |
| 17 | 47750538 | rs10515007 | 47762776 | rs1386269  | 0.748 |
| 17 | 47750538 | rs10515007 | 47802800 | rs11080004 | 0.385 |
| 17 | 47762776 | rs1386269  | 47802800 | rs11080004 | 0.492 |
| 17 | 47862591 | rs4794347  | 48034698 | rs4794363  | 0.352 |
| 17 | 47862591 | rs4794347  | 48040637 | rs954506   | 0.352 |
| 17 | 47862591 | rs4794347  | 48040777 | rs2319988  | 0.351 |
| 17 | 47862591 | rs4794347  | 48051058 | rs1492198  | 0.344 |
| 17 | 47862591 | rs4794347  | 48058862 | rs2467486  | 0.342 |
| 17 | 47862591 | rs4794347  | 48072908 | rs1492227  | 0.352 |
| 17 | 47862591 | rs4794347  | 48093607 | rs2452247  | 0.284 |

|    |          |           |          |            |       |
|----|----------|-----------|----------|------------|-------|
| 17 | 47938582 | rs350011  | 47941885 | rs350016   | 0.975 |
| 17 | 47938582 | rs350011  | 48034698 | rs4794363  | 0.349 |
| 17 | 47938582 | rs350011  | 48040637 | rs954506   | 0.349 |
| 17 | 47938582 | rs350011  | 48040777 | rs2319988  | 0.347 |
| 17 | 47938582 | rs350011  | 48051058 | rs1492198  | 0.327 |
| 17 | 47938582 | rs350011  | 48058862 | rs2467486  | 0.308 |
| 17 | 47938582 | rs350011  | 48072908 | rs1492227  | 0.320 |
| 17 | 47938582 | rs350011  | 48093607 | rs2452247  | 0.314 |
| 17 | 47938582 | rs350011  | 48093793 | rs2452248  | 0.309 |
| 17 | 47941885 | rs350016  | 48034698 | rs4794363  | 0.380 |
| 17 | 47941885 | rs350016  | 48040637 | rs954506   | 0.380 |
| 17 | 47941885 | rs350016  | 48040777 | rs2319988  | 0.378 |
| 17 | 47941885 | rs350016  | 48051058 | rs1492198  | 0.356 |
| 17 | 47941885 | rs350016  | 48058862 | rs2467486  | 0.338 |
| 17 | 47941885 | rs350016  | 48072908 | rs1492227  | 0.350 |
| 17 | 47941885 | rs350016  | 48093607 | rs2452247  | 0.329 |
| 17 | 47941885 | rs350016  | 48093793 | rs2452248  | 0.325 |
| 17 | 47941885 | rs350016  | 48094974 | rs1907667  | 0.325 |
| 17 | 48034698 | rs4794363 | 48040637 | rs954506   | 1.000 |
| 17 | 48034698 | rs4794363 | 48040777 | rs2319988  | 1.000 |
| 17 | 48034698 | rs4794363 | 48051058 | rs1492198  | 0.988 |
| 17 | 48034698 | rs4794363 | 48058862 | rs2467486  | 0.963 |
| 17 | 48034698 | rs4794363 | 48072908 | rs1492227  | 0.976 |
| 17 | 48034698 | rs4794363 | 48093607 | rs2452247  | 0.856 |
| 17 | 48034698 | rs4794363 | 48093793 | rs2452248  | 0.877 |
| 17 | 48034698 | rs4794363 | 48094974 | rs1907667  | 0.877 |
| 17 | 48034698 | rs4794363 | 48096000 | rs2452249  | 0.866 |
| 17 | 48040637 | rs954506  | 48040777 | rs2319988  | 1.000 |
| 17 | 48040637 | rs954506  | 48051058 | rs1492198  | 0.988 |
| 17 | 48040637 | rs954506  | 48058862 | rs2467486  | 0.963 |
| 17 | 48040637 | rs954506  | 48072908 | rs1492227  | 0.976 |
| 17 | 48040637 | rs954506  | 48093607 | rs2452247  | 0.856 |
| 17 | 48040637 | rs954506  | 48093793 | rs2452248  | 0.877 |
| 17 | 48040637 | rs954506  | 48094974 | rs1907667  | 0.877 |
| 17 | 48040637 | rs954506  | 48096000 | rs2452249  | 0.866 |
| 17 | 48040637 | rs954506  | 48121473 | rs10515023 | 0.335 |
| 17 | 48040777 | rs2319988 | 48051058 | rs1492198  | 0.988 |
| 17 | 48040777 | rs2319988 | 48058862 | rs2467486  | 0.963 |
| 17 | 48040777 | rs2319988 | 48072908 | rs1492227  | 0.976 |
| 17 | 48040777 | rs2319988 | 48093607 | rs2452247  | 0.856 |
| 17 | 48040777 | rs2319988 | 48093793 | rs2452248  | 0.876 |
| 17 | 48040777 | rs2319988 | 48094974 | rs1907667  | 0.876 |
| 17 | 48040777 | rs2319988 | 48096000 | rs2452249  | 0.866 |
| 17 | 48040777 | rs2319988 | 48121473 | rs10515023 | 0.334 |

|    |          |            |          |            |       |
|----|----------|------------|----------|------------|-------|
| 17 | 48051058 | rs1492198  | 48058862 | rs2467486  | 0.976 |
| 17 | 48051058 | rs1492198  | 48072908 | rs1492227  | 0.988 |
| 17 | 48051058 | rs1492198  | 48093607 | rs2452247  | 0.868 |
| 17 | 48051058 | rs1492198  | 48093793 | rs2452248  | 0.889 |
| 17 | 48051058 | rs1492198  | 48094974 | rs1907667  | 0.889 |
| 17 | 48051058 | rs1492198  | 48096000 | rs2452249  | 0.878 |
| 17 | 48051058 | rs1492198  | 48121473 | rs10515023 | 0.341 |
| 17 | 48051058 | rs1492198  | 48192021 | rs4451995  | 0.316 |
| 17 | 48058862 | rs2467486  | 48072908 | rs1492227  | 0.988 |
| 17 | 48058862 | rs2467486  | 48093607 | rs2452247  | 0.865 |
| 17 | 48058862 | rs2467486  | 48093793 | rs2452248  | 0.886 |
| 17 | 48058862 | rs2467486  | 48094974 | rs1907667  | 0.886 |
| 17 | 48058862 | rs2467486  | 48096000 | rs2452249  | 0.875 |
| 17 | 48058862 | rs2467486  | 48121473 | rs10515023 | 0.325 |
| 17 | 48058862 | rs2467486  | 48192021 | rs4451995  | 0.310 |
| 17 | 48058862 | rs2467486  | 48196285 | rs11871098 | 0.318 |
| 17 | 48072908 | rs1492227  | 48093607 | rs2452247  | 0.878 |
| 17 | 48072908 | rs1492227  | 48093793 | rs2452248  | 0.899 |
| 17 | 48072908 | rs1492227  | 48094974 | rs1907667  | 0.899 |
| 17 | 48072908 | rs1492227  | 48096000 | rs2452249  | 0.889 |
| 17 | 48072908 | rs1492227  | 48121473 | rs10515023 | 0.335 |
| 17 | 48072908 | rs1492227  | 48192021 | rs4451995  | 0.323 |
| 17 | 48072908 | rs1492227  | 48196285 | rs11871098 | 0.330 |
| 17 | 48093607 | rs2452247  | 48093793 | rs2452248  | 0.977 |
| 17 | 48093607 | rs2452247  | 48094974 | rs1907667  | 0.977 |
| 17 | 48093607 | rs2452247  | 48096000 | rs2452249  | 0.966 |
| 17 | 48093607 | rs2452247  | 48121473 | rs10515023 | 0.413 |
| 17 | 48093607 | rs2452247  | 48192021 | rs4451995  | 0.449 |
| 17 | 48093607 | rs2452247  | 48196285 | rs11871098 | 0.459 |
| 17 | 48093793 | rs2452248  | 48094974 | rs1907667  | 1.000 |
| 17 | 48093793 | rs2452248  | 48096000 | rs2452249  | 0.989 |
| 17 | 48093793 | rs2452248  | 48121473 | rs10515023 | 0.406 |
| 17 | 48093793 | rs2452248  | 48192021 | rs4451995  | 0.403 |
| 17 | 48093793 | rs2452248  | 48196285 | rs11871098 | 0.412 |
| 17 | 48094974 | rs1907667  | 48096000 | rs2452249  | 0.989 |
| 17 | 48094974 | rs1907667  | 48121473 | rs10515023 | 0.406 |
| 17 | 48094974 | rs1907667  | 48192021 | rs4451995  | 0.403 |
| 17 | 48094974 | rs1907667  | 48196285 | rs11871098 | 0.412 |
| 17 | 48096000 | rs2452249  | 48121473 | rs10515023 | 0.401 |
| 17 | 48096000 | rs2452249  | 48192021 | rs4451995  | 0.396 |
| 17 | 48096000 | rs2452249  | 48196285 | rs11871098 | 0.405 |
| 17 | 48121473 | rs10515023 | 48205748 | rs10515026 | 0.343 |
| 17 | 48192021 | rs4451995  | 48196285 | rs11871098 | 0.989 |
| 17 | 48192021 | rs4451995  | 48205748 | rs10515026 | 0.252 |

|    |          |            |          |            |       |
|----|----------|------------|----------|------------|-------|
| 17 | 48196285 | rs11871098 | 48205748 | rs10515026 | 0.255 |
| 17 | 48664476 | rs807072   | 48666911 | rs1607974  | 0.913 |
| 17 | 48664476 | rs807072   | 48669406 | rs9898437  | 0.932 |
| 17 | 48666911 | rs1607974  | 48669406 | rs9898437  | 0.981 |
| 17 | 49663220 | rs979800   | 49667564 | rs1396087  | 0.887 |
| 17 | 50956167 | rs6504972  | 50962748 | rs12940304 | 0.894 |
| 17 | 50956167 | rs6504972  | 50963972 | rs1396214  | 0.272 |
| 17 | 50956167 | rs6504972  | 50976491 | rs7220324  | 0.769 |
| 17 | 50956167 | rs6504972  | 50976704 | rs1876520  | 0.687 |
| 17 | 50956167 | rs6504972  | 50978009 | rs4239197  | 0.749 |
| 17 | 50956167 | rs6504972  | 50995441 | rs878601   | 0.270 |
| 17 | 50956167 | rs6504972  | 50999345 | rs8067664  | 0.473 |
| 17 | 50962748 | rs12940304 | 50963972 | rs1396214  | 0.248 |
| 17 | 50962748 | rs12940304 | 50976491 | rs7220324  | 0.707 |
| 17 | 50962748 | rs12940304 | 50976704 | rs1876520  | 0.619 |
| 17 | 50962748 | rs12940304 | 50978009 | rs4239197  | 0.687 |
| 17 | 50962748 | rs12940304 | 50995441 | rs878601   | 0.262 |
| 17 | 50962748 | rs12940304 | 50999345 | rs8067664  | 0.411 |
| 17 | 50963972 | rs1396214  | 50976491 | rs7220324  | 0.202 |
| 17 | 50963972 | rs1396214  | 50978009 | rs4239197  | 0.205 |
| 17 | 50963972 | rs1396214  | 50995441 | rs878601   | 0.626 |
| 17 | 50963972 | rs1396214  | 50999345 | rs8067664  | 0.310 |
| 17 | 50963972 | rs1396214  | 51004530 | rs8080325  | 0.436 |
| 17 | 50963972 | rs1396214  | 51004571 | rs8080344  | 0.436 |
| 17 | 50976491 | rs7220324  | 50976704 | rs1876520  | 0.903 |
| 17 | 50976491 | rs7220324  | 50978009 | rs4239197  | 0.955 |
| 17 | 50976491 | rs7220324  | 50995441 | rs878601   | 0.260 |
| 17 | 50976491 | rs7220324  | 50999345 | rs8067664  | 0.551 |
| 17 | 50976491 | rs7220324  | 51009466 | rs7211277  | 0.377 |
| 17 | 50976491 | rs7220324  | 51009547 | rs7211426  | 0.377 |
| 17 | 50976491 | rs7220324  | 51020804 | rs986959   | 0.488 |
| 17 | 50976704 | rs1876520  | 50978009 | rs4239197  | 0.957 |
| 17 | 50976704 | rs1876520  | 50995441 | rs878601   | 0.226 |
| 17 | 50976704 | rs1876520  | 50999345 | rs8067664  | 0.479 |
| 17 | 50976704 | rs1876520  | 51009466 | rs7211277  | 0.476 |
| 17 | 50976704 | rs1876520  | 51009547 | rs7211426  | 0.476 |
| 17 | 50976704 | rs1876520  | 51020804 | rs986959   | 0.498 |
| 17 | 50978009 | rs4239197  | 50995441 | rs878601   | 0.263 |
| 17 | 50978009 | rs4239197  | 50999345 | rs8067664  | 0.542 |
| 17 | 50978009 | rs4239197  | 51009466 | rs7211277  | 0.439 |
| 17 | 50978009 | rs4239197  | 51009547 | rs7211426  | 0.439 |
| 17 | 50978009 | rs4239197  | 51020804 | rs986959   | 0.496 |
| 17 | 50978009 | rs4239197  | 51025593 | rs9912785  | 0.429 |
| 17 | 50995441 | rs878601   | 50999345 | rs8067664  | 0.259 |

|    |          |            |          |            |       |
|----|----------|------------|----------|------------|-------|
| 17 | 50995441 | rs878601   | 51004530 | rs8080325  | 0.368 |
| 17 | 50995441 | rs878601   | 51004571 | rs8080344  | 0.368 |
| 17 | 50995441 | rs878601   | 51009466 | rs7211277  | 0.203 |
| 17 | 50995441 | rs878601   | 51009547 | rs7211426  | 0.203 |
| 17 | 50995441 | rs878601   | 51020804 | rs986959   | 0.224 |
| 17 | 50995441 | rs878601   | 51021347 | rs17819647 | 0.348 |
| 17 | 50995441 | rs878601   | 51025593 | rs9912785  | 0.204 |
| 17 | 50995441 | rs878601   | 51041857 | rs9905891  | 0.215 |
| 17 | 50999345 | rs8067664  | 51004530 | rs8080325  | 0.201 |
| 17 | 50999345 | rs8067664  | 51004571 | rs8080344  | 0.201 |
| 17 | 50999345 | rs8067664  | 51020804 | rs986959   | 0.236 |
| 17 | 51004530 | rs8080325  | 51004571 | rs8080344  | 1.000 |
| 17 | 51004530 | rs8080325  | 51021347 | rs17819647 | 0.919 |
| 17 | 51004571 | rs8080344  | 51021347 | rs17819647 | 0.919 |
| 17 | 51004571 | rs8080344  | 51077176 | rs16956163 | 0.628 |
| 17 | 51009466 | rs7211277  | 51009547 | rs7211426  | 1.000 |
| 17 | 51009466 | rs7211277  | 51020804 | rs986959   | 0.822 |
| 17 | 51009466 | rs7211277  | 51025593 | rs9912785  | 0.948 |
| 17 | 51009466 | rs7211277  | 51041857 | rs9905891  | 0.965 |
| 17 | 51009466 | rs7211277  | 51055766 | rs9891412  | 0.949 |
| 17 | 51009466 | rs7211277  | 51070449 | rs9907033  | 0.872 |
| 17 | 51009466 | rs7211277  | 51077176 | rs16956163 | 0.294 |
| 17 | 51009547 | rs7211426  | 51020804 | rs986959   | 0.822 |
| 17 | 51009547 | rs7211426  | 51025593 | rs9912785  | 0.948 |
| 17 | 51009547 | rs7211426  | 51041857 | rs9905891  | 0.965 |
| 17 | 51009547 | rs7211426  | 51055766 | rs9891412  | 0.949 |
| 17 | 51009547 | rs7211426  | 51070449 | rs9907033  | 0.872 |
| 17 | 51009547 | rs7211426  | 51077176 | rs16956163 | 0.294 |
| 17 | 51020804 | rs986959   | 51025593 | rs9912785  | 0.785 |
| 17 | 51020804 | rs986959   | 51041857 | rs9905891  | 0.793 |
| 17 | 51020804 | rs986959   | 51055766 | rs9891412  | 0.767 |
| 17 | 51020804 | rs986959   | 51070449 | rs9907033  | 0.739 |
| 17 | 51020804 | rs986959   | 51077176 | rs16956163 | 0.295 |
| 17 | 51021347 | rs17819647 | 51077176 | rs16956163 | 0.659 |
| 17 | 51025593 | rs9912785  | 51041857 | rs9905891  | 0.982 |
| 17 | 51025593 | rs9912785  | 51055766 | rs9891412  | 0.948 |
| 17 | 51025593 | rs9912785  | 51070449 | rs9907033  | 0.870 |
| 17 | 51025593 | rs9912785  | 51077176 | rs16956163 | 0.323 |
| 17 | 51041857 | rs9905891  | 51055766 | rs9891412  | 0.965 |
| 17 | 51041857 | rs9905891  | 51070449 | rs9907033  | 0.886 |
| 17 | 51041857 | rs9905891  | 51077176 | rs16956163 | 0.308 |
| 17 | 51055766 | rs9891412  | 51070449 | rs9907033  | 0.922 |
| 17 | 51055766 | rs9891412  | 51077176 | rs16956163 | 0.321 |
| 17 | 51070449 | rs9907033  | 51077176 | rs16956163 | 0.346 |

|    |          |            |          |            |       |
|----|----------|------------|----------|------------|-------|
| 17 | 52113556 | rs1879143  | 52113654 | rs887088   | 0.752 |
| 17 | 52773732 | rs792402   | 52784443 | rs792387   | 0.232 |
| 17 | 52784443 | rs792387   | 52790274 | rs9904395  | 0.301 |
| 17 | 56055974 | rs7208331  | 56939347 | rs10853034 | 0.230 |
| 17 | 57602509 | rs12451501 | 57618904 | rs4968413  | 0.203 |
| 17 | 57602509 | rs12451501 | 57618993 | rs4968414  | 0.235 |
| 17 | 57618904 | rs4968413  | 57618993 | rs4968414  | 0.979 |
| 17 | 60684655 | rs9915678  | 60686487 | rs17689972 | 0.210 |
| 17 | 60684655 | rs9915678  | 60731999 | rs17763899 | 0.505 |
| 17 | 60684655 | rs9915678  | 60732937 | rs9910773  | 0.357 |
| 17 | 60684655 | rs9915678  | 60754695 | rs41390346 | 0.293 |
| 17 | 60686487 | rs17689972 | 60731999 | rs17763899 | 0.661 |
| 17 | 60686487 | rs17689972 | 60732937 | rs9910773  | 0.378 |
| 17 | 60686487 | rs17689972 | 60754695 | rs41390346 | 0.661 |
| 17 | 60731999 | rs17763899 | 60732937 | rs9910773  | 0.645 |
| 17 | 60731999 | rs17763899 | 60754695 | rs41390346 | 0.622 |
| 17 | 60732937 | rs9910773  | 60754695 | rs41390346 | 0.371 |
| 17 | 60878885 | rs9910440  | 60878953 | rs9908987  | 0.344 |
| 17 | 61948969 | rs956952   | 61949724 | rs16959508 | 0.989 |
| 17 | 61948969 | rs956952   | 61952114 | rs16959514 | 0.358 |
| 17 | 61949724 | rs16959508 | 61952114 | rs16959514 | 0.371 |
| 17 | 65575226 | rs1013996  | 65605507 | rs10221235 | 0.249 |
| 17 | 65581802 | rs3760393  | 65605507 | rs10221235 | 0.256 |
| 17 | 69257571 | rs2683165  | 69257822 | rs2683164  | 0.545 |
| 17 | 74467863 | rs11654023 | 74468926 | rs8074370  | 0.897 |
| 18 | 983637   | rs9954574  | 998431   | rs789073   | 0.787 |
| 18 | 3732572  | rs3745050  | 3732713  | rs11873533 | 0.980 |
| 18 | 3732572  | rs3745050  | 3736382  | rs1815957  | 0.904 |
| 18 | 3732713  | rs11873533 | 3736382  | rs1815957  | 0.901 |
| 18 | 4646266  | rs7243287  | 4696335  | rs11081144 | 0.626 |
| 18 | 4646266  | rs7243287  | 4700778  | rs1940848  | 0.594 |
| 18 | 4646266  | rs7243287  | 4720655  | rs4797180  | 0.316 |
| 18 | 4646266  | rs7243287  | 4720882  | rs8091193  | 0.599 |
| 18 | 4696335  | rs11081144 | 4700778  | rs1940848  | 0.944 |
| 18 | 4696335  | rs11081144 | 4720655  | rs4797180  | 0.533 |
| 18 | 4696335  | rs11081144 | 4720882  | rs8091193  | 0.929 |
| 18 | 4700778  | rs1940848  | 4720655  | rs4797180  | 0.531 |
| 18 | 4700778  | rs1940848  | 4720882  | rs8091193  | 0.912 |
| 18 | 4720655  | rs4797180  | 4720882  | rs8091193  | 0.575 |
| 18 | 6272593  | rs403814   | 6277726  | rs1452539  | 0.909 |
| 18 | 6272593  | rs403814   | 6284119  | rs3898848  | 0.635 |
| 18 | 6272593  | rs403814   | 6318558  | rs17502069 | 0.457 |
| 18 | 6272593  | rs403814   | 6327489  | rs186884   | 0.851 |
| 18 | 6277726  | rs1452539  | 6284119  | rs3898848  | 0.717 |

|    |          |            |          |            |       |
|----|----------|------------|----------|------------|-------|
| 18 | 6277726  | rs1452539  | 6318558  | rs17502069 | 0.496 |
| 18 | 6277726  | rs1452539  | 6327489  | rs186884   | 0.880 |
| 18 | 6284119  | rs3898848  | 6318558  | rs17502069 | 0.624 |
| 18 | 6284119  | rs3898848  | 6327489  | rs186884   | 0.609 |
| 18 | 6318558  | rs17502069 | 6327489  | rs186884   | 0.458 |
| 18 | 6967044  | rs658121   | 6967110  | rs1790518  | 0.974 |
| 18 | 6967044  | rs658121   | 6968725  | rs686378   | 0.762 |
| 18 | 6967110  | rs1790518  | 6968725  | rs686378   | 0.758 |
| 18 | 7205275  | rs8094220  | 7214416  | rs9966939  | 0.951 |
| 18 | 7937846  | rs7239786  | 8128090  | rs687245   | 0.290 |
| 18 | 8116599  | rs663105   | 8128090  | rs687245   | 0.839 |
| 18 | 8491545  | rs12457756 | 8493565  | rs12454304 | 0.275 |
| 18 | 9019558  | rs9973176  | 9019580  | rs6506633  | 0.521 |
| 18 | 9541028  | rs745218   | 9567981  | rs9946612  | 0.871 |
| 18 | 10914184 | rs264271   | 10915419 | rs264270   | 1.000 |
| 18 | 10914184 | rs264271   | 10916135 | rs264268   | 1.000 |
| 18 | 10914184 | rs264271   | 10918393 | rs264263   | 0.965 |
| 18 | 10915419 | rs264270   | 10916135 | rs264268   | 1.000 |
| 18 | 10915419 | rs264270   | 10918393 | rs264263   | 0.965 |
| 18 | 10916135 | rs264268   | 10918393 | rs264263   | 0.965 |
| 18 | 11001381 | rs3246     | 11003889 | rs1471671  | 0.363 |
| 18 | 11001381 | rs3246     | 11010599 | rs2625358  | 0.286 |
| 18 | 11003889 | rs1471671  | 11010599 | rs2625358  | 0.783 |
| 18 | 11764500 | rs2161961  | 11792991 | rs9303749  | 0.680 |
| 18 | 12769947 | rs2542151  | 12787694 | rs2847297  | 0.299 |
| 18 | 12769947 | rs2542151  | 12867060 | rs7234029  | 0.236 |
| 18 | 12787694 | rs2847297  | 12867060 | rs7234029  | 0.358 |
| 18 | 13729959 | rs8097240  | 13736992 | rs1942672  | 0.990 |
| 18 | 13729959 | rs8097240  | 13750954 | rs11659762 | 1.000 |
| 18 | 13736992 | rs1942672  | 13750954 | rs11659762 | 0.991 |
| 18 | 13839297 | rs6505850  | 13842419 | rs948324   | 0.634 |
| 18 | 13842419 | rs948324   | 13861956 | rs1941092  | 0.279 |
| 18 | 20148975 | rs12709785 | 20154446 | rs2588567  | 0.820 |
| 18 | 20539276 | rs11873809 | 20653546 | rs17203977 | 0.372 |
| 18 | 20813646 | rs17798760 | 20841181 | rs8090665  | 0.315 |
| 18 | 22621571 | rs11663064 | 22664983 | rs16958776 | 0.356 |
| 18 | 23402923 | rs16943751 | 23445921 | rs16943845 | 0.785 |
| 18 | 23402923 | rs16943751 | 23493453 | rs16943923 | 0.306 |
| 18 | 23445921 | rs16943845 | 23493453 | rs16943923 | 0.329 |
| 18 | 24426085 | rs11663444 | 24482485 | rs6508558  | 0.864 |
| 18 | 28053311 | rs10502585 | 28075158 | rs9963993  | 0.978 |
| 18 | 28095530 | rs16962918 | 28119201 | rs16962971 | 0.911 |
| 18 | 28554107 | rs12456916 | 28554420 | rs12456996 | 0.848 |
| 18 | 28554107 | rs12456916 | 28554509 | rs12454409 | 0.965 |



|    |          |            |          |            |       |
|----|----------|------------|----------|------------|-------|
| 18 | 28554420 | rs12456996 | 28554509 | rs12454409 | 0.878 |
| 18 | 29564414 | rs1389535  | 29569876 | rs9956918  | 0.789 |
| 18 | 29564414 | rs1389535  | 29576276 | rs6507060  | 0.833 |
| 18 | 29564414 | rs1389535  | 29582718 | rs9947894  | 0.815 |
| 18 | 29564414 | rs1389535  | 29612489 | rs1565784  | 0.786 |
| 18 | 29564414 | rs1389535  | 29642678 | rs12958029 | 0.505 |
| 18 | 29564414 | rs1389535  | 29643863 | rs12457802 | 0.620 |
| 18 | 29569876 | rs9956918  | 29576276 | rs6507060  | 0.790 |
| 18 | 29569876 | rs9956918  | 29582718 | rs9947894  | 0.736 |
| 18 | 29569876 | rs9956918  | 29612489 | rs1565784  | 0.688 |
| 18 | 29569876 | rs9956918  | 29642678 | rs12958029 | 0.510 |
| 18 | 29569876 | rs9956918  | 29643863 | rs12457802 | 0.615 |
| 18 | 29576276 | rs6507060  | 29582718 | rs9947894  | 0.857 |
| 18 | 29576276 | rs6507060  | 29612489 | rs1565784  | 0.798 |
| 18 | 29576276 | rs6507060  | 29642678 | rs12958029 | 0.433 |
| 18 | 29576276 | rs6507060  | 29643863 | rs12457802 | 0.603 |
| 18 | 29582718 | rs9947894  | 29612489 | rs1565784  | 0.931 |
| 18 | 29582718 | rs9947894  | 29642678 | rs12958029 | 0.477 |
| 18 | 29582718 | rs9947894  | 29643863 | rs12457802 | 0.655 |
| 18 | 29612489 | rs1565784  | 29642678 | rs12958029 | 0.476 |
| 18 | 29612489 | rs1565784  | 29643863 | rs12457802 | 0.644 |
| 18 | 29642678 | rs12958029 | 29643863 | rs12457802 | 0.479 |
| 18 | 33911399 | rs16969649 | 33914511 | rs8091939  | 0.984 |
| 18 | 33911399 | rs16969649 | 33924324 | rs979433   | 0.624 |
| 18 | 33911399 | rs16969649 | 33927540 | rs12150709 | 0.624 |
| 18 | 33911399 | rs16969649 | 33941894 | rs9952844  | 0.685 |
| 18 | 33914511 | rs8091939  | 33924324 | rs979433   | 0.631 |
| 18 | 33914511 | rs8091939  | 33927540 | rs12150709 | 0.631 |
| 18 | 33914511 | rs8091939  | 33941894 | rs9952844  | 0.694 |
| 18 | 33914511 | rs8091939  | 34016459 | rs9950528  | 0.206 |
| 18 | 33924324 | rs979433   | 33927540 | rs12150709 | 1.000 |
| 18 | 33924324 | rs979433   | 33941894 | rs9952844  | 0.829 |
| 18 | 33927540 | rs12150709 | 33941894 | rs9952844  | 0.829 |
| 18 | 34283162 | rs11665456 | 34283363 | rs9304191  | 0.969 |
| 18 | 34287621 | rs16970229 | 34290429 | rs867752   | 0.687 |
| 18 | 34287621 | rs16970229 | 34307641 | rs16970360 | 0.862 |
| 18 | 34290429 | rs867752   | 34307641 | rs16970360 | 0.594 |
| 18 | 38200013 | rs346443   | 38395988 | rs12373388 | 0.265 |
| 18 | 38579747 | rs598658   | 38580258 | rs567325   | 0.984 |
| 18 | 39650092 | rs16977675 | 39650277 | rs12458722 | 0.990 |
| 18 | 39650092 | rs16977675 | 39651882 | rs1380834  | 0.961 |
| 18 | 39650277 | rs12458722 | 39651882 | rs1380834  | 0.971 |
| 18 | 40269659 | rs8087876  | 40287441 | rs16978001 | 0.622 |
| 18 | 40269659 | rs8087876  | 40291585 | rs2063503  | 0.569 |

|    |          |            |          |            |       |
|----|----------|------------|----------|------------|-------|
| 18 | 40269659 | rs8087876  | 40298960 | rs7230479  | 0.844 |
| 18 | 40269659 | rs8087876  | 40302212 | rs9957037  | 0.979 |
| 18 | 40269659 | rs8087876  | 40309270 | rs2359894  | 0.990 |
| 18 | 40269659 | rs8087876  | 40322004 | rs12605825 | 0.540 |
| 18 | 40269659 | rs8087876  | 40331423 | rs12456054 | 0.298 |
| 18 | 40269659 | rs8087876  | 40340980 | rs8084507  | 0.827 |
| 18 | 40287441 | rs16978001 | 40291585 | rs2063503  | 0.975 |
| 18 | 40287441 | rs16978001 | 40298960 | rs7230479  | 0.550 |
| 18 | 40287441 | rs16978001 | 40302212 | rs9957037  | 0.627 |
| 18 | 40287441 | rs16978001 | 40309270 | rs2359894  | 0.620 |
| 18 | 40287441 | rs16978001 | 40322004 | rs12605825 | 0.266 |
| 18 | 40287441 | rs16978001 | 40331423 | rs12456054 | 0.473 |
| 18 | 40287441 | rs16978001 | 40340980 | rs8084507  | 0.539 |
| 18 | 40291585 | rs2063503  | 40298960 | rs7230479  | 0.502 |
| 18 | 40291585 | rs2063503  | 40302212 | rs9957037  | 0.574 |
| 18 | 40291585 | rs2063503  | 40309270 | rs2359894  | 0.568 |
| 18 | 40291585 | rs2063503  | 40322004 | rs12605825 | 0.240 |
| 18 | 40291585 | rs2063503  | 40331423 | rs12456054 | 0.488 |
| 18 | 40291585 | rs2063503  | 40340980 | rs8084507  | 0.492 |
| 18 | 40298960 | rs7230479  | 40302212 | rs9957037  | 0.845 |
| 18 | 40298960 | rs7230479  | 40309270 | rs2359894  | 0.853 |
| 18 | 40298960 | rs7230479  | 40322004 | rs12605825 | 0.446 |
| 18 | 40298960 | rs7230479  | 40331423 | rs12456054 | 0.264 |
| 18 | 40298960 | rs7230479  | 40340980 | rs8084507  | 0.980 |
| 18 | 40302212 | rs9957037  | 40309270 | rs2359894  | 0.990 |
| 18 | 40302212 | rs9957037  | 40322004 | rs12605825 | 0.547 |
| 18 | 40302212 | rs9957037  | 40331423 | rs12456054 | 0.308 |
| 18 | 40302212 | rs9957037  | 40340980 | rs8084507  | 0.828 |
| 18 | 40309270 | rs2359894  | 40322004 | rs12605825 | 0.541 |
| 18 | 40309270 | rs2359894  | 40331423 | rs12456054 | 0.304 |
| 18 | 40309270 | rs2359894  | 40340980 | rs8084507  | 0.836 |
| 18 | 40322004 | rs12605825 | 40331423 | rs12456054 | 0.546 |
| 18 | 40322004 | rs12605825 | 40340980 | rs8084507  | 0.437 |
| 18 | 40331423 | rs12456054 | 40340980 | rs8084507  | 0.259 |
| 18 | 43305157 | rs8091926  | 43335567 | rs16954613 | 0.509 |
| 18 | 43860140 | rs7504329  | 43865465 | rs6507802  | 0.237 |
| 18 | 44233865 | rs4939776  | 44235524 | rs5029382  | 0.827 |
| 18 | 44233865 | rs4939776  | 44272557 | rs1512177  | 0.532 |
| 18 | 44235524 | rs5029382  | 44272557 | rs1512177  | 0.460 |
| 18 | 44970083 | rs4939846  | 45024184 | rs11661691 | 0.223 |
| 18 | 44970083 | rs4939846  | 45027558 | rs11662738 | 0.284 |
| 18 | 45024184 | rs11661691 | 45027558 | rs11662738 | 0.726 |
| 18 | 47962726 | rs4423510  | 47984154 | rs12456856 | 0.629 |
| 18 | 52746016 | rs7237084  | 52783500 | rs9954313  | 0.744 |

|    |          |            |          |            |       |
|----|----------|------------|----------|------------|-------|
| 18 | 53313517 | rs4940804  | 53340294 | rs7235134  | 0.500 |
| 18 | 53666463 | rs17759803 | 53683532 | rs3897751  | 0.395 |
| 18 | 54694937 | rs12969520 | 54697058 | rs17694691 | 0.569 |
| 18 | 54697058 | rs17694691 | 54730364 | rs11872224 | 0.275 |
| 18 | 55230517 | rs8088790  | 55238263 | rs9319950  | 0.823 |
| 18 | 55230517 | rs8088790  | 55249616 | rs7230906  | 0.820 |
| 18 | 55238263 | rs9319950  | 55249616 | rs7230906  | 0.853 |
| 18 | 55508632 | rs1429577  | 55511113 | rs2852356  | 0.842 |
| 18 | 56338128 | rs881474   | 56362278 | rs17067050 | 0.808 |
| 18 | 57350414 | rs9783862  | 57357460 | rs11875000 | 0.895 |
| 18 | 57623326 | rs9960910  | 57627449 | rs9963722  | 0.412 |
| 18 | 57798480 | rs2116334  | 57798816 | rs1346949  | 0.676 |
| 18 | 57798480 | rs2116334  | 57811523 | rs1431583  | 0.735 |
| 18 | 57798480 | rs2116334  | 57811870 | rs1431584  | 0.988 |
| 18 | 57798480 | rs2116334  | 57886440 | rs1030582  | 0.278 |
| 18 | 57798480 | rs2116334  | 57886973 | rs17634631 | 0.813 |
| 18 | 57798480 | rs2116334  | 57925017 | rs9319997  | 0.813 |
| 18 | 57798480 | rs2116334  | 57927708 | rs17641823 | 0.813 |
| 18 | 57798816 | rs1346949  | 57811523 | rs1431583  | 0.660 |
| 18 | 57798816 | rs1346949  | 57811870 | rs1431584  | 0.668 |
| 18 | 57798816 | rs1346949  | 57886973 | rs17634631 | 0.563 |
| 18 | 57798816 | rs1346949  | 57925017 | rs9319997  | 0.563 |
| 18 | 57798816 | rs1346949  | 57927708 | rs17641823 | 0.563 |
| 18 | 57811523 | rs1431583  | 57811870 | rs1431584  | 0.745 |
| 18 | 57811523 | rs1431583  | 57886973 | rs17634631 | 0.611 |
| 18 | 57811523 | rs1431583  | 57925017 | rs9319997  | 0.611 |
| 18 | 57811523 | rs1431583  | 57927708 | rs17641823 | 0.611 |
| 18 | 57811870 | rs1431584  | 57886440 | rs1030582  | 0.285 |
| 18 | 57811870 | rs1431584  | 57886973 | rs17634631 | 0.822 |
| 18 | 57811870 | rs1431584  | 57925017 | rs9319997  | 0.822 |
| 18 | 57811870 | rs1431584  | 57927708 | rs17641823 | 0.822 |
| 18 | 57886440 | rs1030582  | 57886973 | rs17634631 | 0.286 |
| 18 | 57886440 | rs1030582  | 57925017 | rs9319997  | 0.286 |
| 18 | 57886440 | rs1030582  | 57927708 | rs17641823 | 0.286 |
| 18 | 57886973 | rs17634631 | 57925017 | rs9319997  | 1.000 |
| 18 | 57886973 | rs17634631 | 57927708 | rs17641823 | 1.000 |
| 18 | 57925017 | rs9319997  | 57927708 | rs17641823 | 1.000 |
| 18 | 61626782 | rs7244664  | 61627079 | rs1994230  | 0.406 |
| 18 | 61626782 | rs7244664  | 61736852 | rs205084   | 0.339 |
| 18 | 61627079 | rs1994230  | 61736852 | rs205084   | 0.232 |
| 18 | 64662990 | rs1893438  | 64663123 | rs1539896  | 0.799 |
| 18 | 66933645 | rs17181300 | 67045771 | rs17193525 | 0.247 |
| 18 | 67014919 | rs8098181  | 67022529 | rs4599012  | 0.833 |
| 18 | 67014919 | rs8098181  | 67045771 | rs17193525 | 0.646 |

|    |          |            |          |            |       |
|----|----------|------------|----------|------------|-------|
| 18 | 67014919 | rs8098181  | 67097075 | rs17281295 | 0.802 |
| 18 | 67022529 | rs4599012  | 67045771 | rs17193525 | 0.508 |
| 18 | 67022529 | rs4599012  | 67097075 | rs17281295 | 0.633 |
| 18 | 67045771 | rs17193525 | 67097075 | rs17281295 | 0.713 |
| 18 | 67591733 | rs8094687  | 67593046 | rs17225992 | 0.963 |
| 18 | 68900356 | rs2469032  | 68926719 | rs11661950 | 0.245 |
| 18 | 68900356 | rs2469032  | 68926813 | rs11661997 | 0.245 |
| 18 | 68900356 | rs2469032  | 68942375 | rs1503024  | 0.367 |
| 18 | 68926719 | rs11661950 | 68926813 | rs11661997 | 1.000 |
| 18 | 68926719 | rs11661950 | 68942375 | rs1503024  | 0.547 |
| 18 | 68926813 | rs11661997 | 68942375 | rs1503024  | 0.547 |
| 18 | 69452130 | rs2703496  | 69473486 | rs8095367  | 0.237 |
| 18 | 69452130 | rs2703496  | 69473702 | rs4892122  | 0.598 |
| 18 | 69452130 | rs2703496  | 69473773 | rs17763239 | 0.237 |
| 18 | 69452130 | rs2703496  | 69473889 | rs17763263 | 0.237 |
| 18 | 69452130 | rs2703496  | 69478734 | rs6566752  | 0.315 |
| 18 | 69452130 | rs2703496  | 69498117 | rs8092542  | 0.489 |
| 18 | 69452130 | rs2703496  | 69498407 | rs9953978  | 0.496 |
| 18 | 69473486 | rs8095367  | 69473702 | rs4892122  | 0.339 |
| 18 | 69473486 | rs8095367  | 69473773 | rs17763239 | 1.000 |
| 18 | 69473486 | rs8095367  | 69473889 | rs17763263 | 1.000 |
| 18 | 69473486 | rs8095367  | 69478734 | rs6566752  | 0.566 |
| 18 | 69473486 | rs8095367  | 69498117 | rs8092542  | 0.342 |
| 18 | 69473486 | rs8095367  | 69498407 | rs9953978  | 0.321 |
| 18 | 69473702 | rs4892122  | 69473773 | rs17763239 | 0.339 |
| 18 | 69473702 | rs4892122  | 69473889 | rs17763263 | 0.339 |
| 18 | 69473702 | rs4892122  | 69478734 | rs6566752  | 0.568 |
| 18 | 69473702 | rs4892122  | 69498117 | rs8092542  | 0.590 |
| 18 | 69473702 | rs4892122  | 69498407 | rs9953978  | 0.577 |
| 18 | 69473773 | rs17763239 | 69473889 | rs17763263 | 1.000 |
| 18 | 69473773 | rs17763239 | 69478734 | rs6566752  | 0.566 |
| 18 | 69473773 | rs17763239 | 69498117 | rs8092542  | 0.342 |
| 18 | 69473773 | rs17763239 | 69498407 | rs9953978  | 0.321 |
| 18 | 69473889 | rs17763263 | 69478734 | rs6566752  | 0.566 |
| 18 | 69473889 | rs17763263 | 69498117 | rs8092542  | 0.342 |
| 18 | 69473889 | rs17763263 | 69498407 | rs9953978  | 0.321 |
| 18 | 69478734 | rs6566752  | 69498117 | rs8092542  | 0.347 |
| 18 | 69478734 | rs6566752  | 69498407 | rs9953978  | 0.334 |
| 18 | 69498117 | rs8092542  | 69498407 | rs9953978  | 0.966 |
| 18 | 71628170 | rs1460280  | 71629102 | rs11659458 | 0.307 |
| 18 | 71628170 | rs1460280  | 71632405 | rs7239549  | 0.758 |
| 18 | 71628170 | rs1460280  | 71634911 | rs4387675  | 0.774 |
| 18 | 71628170 | rs1460280  | 71635578 | rs2187254  | 0.299 |
| 18 | 71629102 | rs11659458 | 71632405 | rs7239549  | 0.219 |

|    |          |            |          |            |       |
|----|----------|------------|----------|------------|-------|
| 18 | 71629102 | rs11659458 | 71634911 | rs4387675  | 0.211 |
| 18 | 71629102 | rs11659458 | 71635578 | rs2187254  | 0.993 |
| 18 | 71632405 | rs7239549  | 71634911 | rs4387675  | 0.985 |
| 18 | 71632405 | rs7239549  | 71635578 | rs2187254  | 0.211 |
| 18 | 71634911 | rs4387675  | 71635578 | rs2187254  | 0.204 |
| 18 | 71846998 | rs7245337  | 71852221 | rs11150924 | 0.927 |
| 18 | 71982132 | rs12969990 | 71984454 | rs10514206 | 1.000 |
| 18 | 72603831 | rs8083046  | 72620941 | rs8088596  | 0.327 |
| 18 | 72613722 | rs4890871  | 72617268 | rs2406342  | 0.875 |
| 18 | 72613722 | rs4890871  | 72620941 | rs8088596  | 0.512 |
| 18 | 72617268 | rs2406342  | 72620941 | rs8088596  | 0.472 |
| 18 | 72985760 | rs1789114  | 72989671 | rs2051408  | 0.946 |
| 18 | 72985760 | rs1789114  | 72995306 | rs1789101  | 0.671 |
| 18 | 72989671 | rs2051408  | 72995306 | rs1789101  | 0.670 |
| 18 | 74518948 | rs11081641 | 74530754 | rs2931057  | 0.840 |
| 18 | 76001711 | rs6506808  | 76037763 | rs2030336  | 0.831 |
| 18 | 76001711 | rs6506808  | 76103230 | rs6506819  | 0.630 |
| 18 | 76037763 | rs2030336  | 76103230 | rs6506819  | 0.788 |
| 19 | 11745524 | rs435368   | 11752003 | rs799193   | 0.233 |
| 19 | 13216068 | rs12052059 | 13216633 | rs12611029 | 0.462 |
| 19 | 13216068 | rs12052059 | 13217380 | rs2302080  | 0.332 |
| 19 | 13216633 | rs12611029 | 13217380 | rs2302080  | 0.698 |
| 19 | 19148901 | rs1050544  | 19158292 | rs3787040  | 0.598 |
| 19 | 20806839 | rs431157   | 20949730 | rs9304978  | 0.543 |
| 19 | 21182564 | rs7254957  | 21257662 | rs279807   | 0.299 |
| 19 | 22696967 | rs12973782 | 22700751 | rs12980129 | 0.637 |
| 19 | 23531320 | rs2195962  | 23534946 | rs2217662  | 0.450 |
| 19 | 23531320 | rs2195962  | 23620564 | rs10417223 | 0.206 |
| 19 | 34456548 | rs12460892 | 34468249 | rs6509333  | 0.702 |
| 19 | 34456548 | rs12460892 | 34472578 | rs759632   | 0.498 |
| 19 | 34456548 | rs12460892 | 34475403 | rs10406799 | 0.759 |
| 19 | 34456548 | rs12460892 | 34476307 | rs11083894 | 0.576 |
| 19 | 34456548 | rs12460892 | 34480470 | rs17624382 | 0.488 |
| 19 | 34468249 | rs6509333  | 34472578 | rs759632   | 0.760 |
| 19 | 34468249 | rs6509333  | 34475403 | rs10406799 | 0.794 |
| 19 | 34468249 | rs6509333  | 34476307 | rs11083894 | 0.678 |
| 19 | 34468249 | rs6509333  | 34480470 | rs17624382 | 0.578 |
| 19 | 34472578 | rs759632   | 34475403 | rs10406799 | 0.588 |
| 19 | 34472578 | rs759632   | 34476307 | rs11083894 | 0.892 |
| 19 | 34472578 | rs759632   | 34480470 | rs17624382 | 0.798 |
| 19 | 34475403 | rs10406799 | 34476307 | rs11083894 | 0.688 |
| 19 | 34475403 | rs10406799 | 34480470 | rs17624382 | 0.693 |
| 19 | 34476307 | rs11083894 | 34480470 | rs17624382 | 0.896 |
| 19 | 36363983 | rs8107562  | 36372570 | rs1353534  | 0.824 |

|    |          |            |          |            |       |
|----|----------|------------|----------|------------|-------|
| 19 | 36363983 | rs8107562  | 36372820 | rs1353535  | 0.824 |
| 19 | 36363983 | rs8107562  | 36398251 | rs8109968  | 0.689 |
| 19 | 36372570 | rs1353534  | 36372820 | rs1353535  | 0.980 |
| 19 | 36372570 | rs1353534  | 36398251 | rs8109968  | 0.605 |
| 19 | 36372820 | rs1353535  | 36398251 | rs8109968  | 0.605 |
| 19 | 38762105 | rs1428669  | 38786025 | rs7255249  | 0.313 |
| 19 | 43726908 | rs10500279 | 43740003 | rs2960321  | 0.350 |
| 19 | 58740763 | rs10411772 | 58741116 | rs16960015 | 0.867 |
| 19 | 60957621 | rs4801624  | 60960908 | rs10426177 | 0.373 |
| 19 | 62689746 | rs6510081  | 62771618 | rs10407412 | 0.292 |
| 19 | 62689746 | rs6510081  | 62773680 | rs10414608 | 0.295 |
| 19 | 62689746 | rs6510081  | 62784856 | rs10405036 | 0.206 |
| 19 | 62771618 | rs10407412 | 62773680 | rs10414608 | 0.958 |
| 19 | 62771618 | rs10407412 | 62784856 | rs10405036 | 0.879 |
| 19 | 62773680 | rs10414608 | 62784856 | rs10405036 | 0.879 |
| 20 | 2302886  | rs2422740  | 2303387  | rs2422741  | 0.948 |
| 20 | 7539005  | rs6055172  | 7539377  | rs6133443  | 0.837 |
| 20 | 7539005  | rs6055172  | 7578428  | rs17403161 | 0.349 |
| 20 | 7539377  | rs6133443  | 7578428  | rs17403161 | 0.431 |
| 20 | 10165497 | rs363029   | 10166376 | rs2327267  | 0.887 |
| 20 | 10165497 | rs363029   | 10166958 | rs363035   | 0.887 |
| 20 | 10166376 | rs2327267  | 10166958 | rs363035   | 1.000 |
| 20 | 11156822 | rs6040446  | 11180291 | rs2327367  | 0.548 |
| 20 | 11156822 | rs6040446  | 11180689 | rs6040477  | 0.548 |
| 20 | 11180291 | rs2327367  | 11180689 | rs6040477  | 1.000 |
| 20 | 11445272 | rs2180286  | 11448108 | rs6104763  | 0.301 |
| 20 | 12429269 | rs6078631  | 12429805 | rs17225893 | 0.756 |
| 20 | 12429269 | rs6078631  | 12438269 | rs10485757 | 0.407 |
| 20 | 12429269 | rs6078631  | 12453962 | rs6041427  | 0.213 |
| 20 | 12429805 | rs17225893 | 12438269 | rs10485757 | 0.444 |
| 20 | 12429805 | rs17225893 | 12453962 | rs6041427  | 0.217 |
| 20 | 12438269 | rs10485757 | 12453962 | rs6041427  | 0.296 |
| 20 | 13087821 | rs1321255  | 13089809 | rs6033633  | 0.666 |
| 20 | 15343353 | rs13039585 | 15376111 | rs11698317 | 0.446 |
| 20 | 17405674 | rs761018   | 17419061 | rs1076688  | 0.333 |
| 20 | 19294184 | rs6046024  | 19396935 | rs6075513  | 0.264 |
| 20 | 19999890 | rs200184   | 20006992 | rs6136938  | 0.456 |
| 20 | 20246483 | rs1000269  | 20251376 | rs6046790  | 0.974 |
| 20 | 21539481 | rs1024207  | 21567273 | rs6082475  | 0.784 |
| 20 | 21539481 | rs1024207  | 21662807 | rs2424400  | 0.392 |
| 20 | 21539481 | rs1024207  | 22364829 | rs6048084  | 0.223 |
| 20 | 21567273 | rs6082475  | 21662807 | rs2424400  | 0.389 |
| 20 | 21772282 | rs8122229  | 21866288 | rs2328682  | 0.517 |
| 20 | 21772282 | rs8122229  | 22063729 | rs804516   | 0.236 |

|    |          |            |          |            |       |
|----|----------|------------|----------|------------|-------|
| 20 | 22038387 | rs201149   | 22063729 | rs804516   | 0.896 |
| 20 | 22063729 | rs804516   | 22364829 | rs6048084  | 0.221 |
| 20 | 22384129 | rs6048105  | 22389124 | rs6036119  | 0.967 |
| 20 | 24009950 | rs858141   | 24088355 | rs6049453  | 0.655 |
| 20 | 24009950 | rs858141   | 24102710 | rs6049471  | 0.655 |
| 20 | 24009950 | rs858141   | 24107265 | rs6049473  | 0.473 |
| 20 | 24009950 | rs858141   | 24135337 | rs2749424  | 0.449 |
| 20 | 24088355 | rs6049453  | 24102710 | rs6049471  | 0.982 |
| 20 | 24088355 | rs6049453  | 24107081 | rs8116594  | 0.338 |
| 20 | 24088355 | rs6049453  | 24107265 | rs6049473  | 0.810 |
| 20 | 24088355 | rs6049453  | 24135337 | rs2749424  | 0.773 |
| 20 | 24102710 | rs6049471  | 24107081 | rs8116594  | 0.318 |
| 20 | 24102710 | rs6049471  | 24107265 | rs6049473  | 0.794 |
| 20 | 24102710 | rs6049471  | 24135337 | rs2749424  | 0.740 |
| 20 | 24107081 | rs8116594  | 24107265 | rs6049473  | 0.484 |
| 20 | 24107081 | rs8116594  | 24135337 | rs2749424  | 0.473 |
| 20 | 24107265 | rs6049473  | 24135337 | rs2749424  | 0.936 |
| 20 | 24996940 | rs2387577  | 25009308 | rs4815368  | 0.516 |
| 20 | 24996940 | rs2387577  | 25044494 | rs2387578  | 0.411 |
| 20 | 30793776 | rs4911252  | 30799639 | rs2424895  | 0.794 |
| 20 | 35182308 | rs1624888  | 35261096 | rs2076398  | 0.813 |
| 20 | 35182308 | rs1624888  | 35271786 | rs2272950  | 0.780 |
| 20 | 35261096 | rs2076398  | 35271786 | rs2272950  | 0.972 |
| 20 | 35736459 | rs6020113  | 35759937 | rs16986890 | 0.376 |
| 20 | 35736459 | rs6020113  | 35839081 | rs6020846  | 0.674 |
| 20 | 35759937 | rs16986890 | 35839081 | rs6020846  | 0.354 |
| 20 | 36353805 | rs6064334  | 36354924 | rs4287822  | 0.943 |
| 20 | 38580350 | rs2207131  | 38588283 | rs6102017  | 0.763 |
| 20 | 38580350 | rs2207131  | 38600118 | rs11908206 | 0.476 |
| 20 | 38580350 | rs2207131  | 38656901 | rs17820549 | 0.368 |
| 20 | 38588283 | rs6102017  | 38600118 | rs11908206 | 0.576 |
| 20 | 38588283 | rs6102017  | 38656901 | rs17820549 | 0.544 |
| 20 | 38600118 | rs11908206 | 38656901 | rs17820549 | 0.543 |
| 20 | 39629468 | rs6093496  | 39677351 | rs7263463  | 0.925 |
| 20 | 40234897 | rs1883377  | 40291139 | rs6093598  | 0.700 |
| 20 | 40234897 | rs1883377  | 40292402 | rs6030070  | 0.346 |
| 20 | 40234897 | rs1883377  | 40292464 | rs6030071  | 0.333 |
| 20 | 40234897 | rs1883377  | 40295037 | rs1014757  | 0.801 |
| 20 | 40234897 | rs1883377  | 40296596 | rs6030076  | 0.349 |
| 20 | 40234897 | rs1883377  | 40321219 | rs6030096  | 0.239 |
| 20 | 40291139 | rs6093598  | 40295037 | rs1014757  | 0.597 |
| 20 | 40291139 | rs6093598  | 40321219 | rs6030096  | 0.318 |
| 20 | 40292402 | rs6030070  | 40292464 | rs6030071  | 0.976 |
| 20 | 40292402 | rs6030070  | 40295037 | rs1014757  | 0.469 |

|    |          |            |          |            |       |
|----|----------|------------|----------|------------|-------|
| 20 | 40292402 | rs6030070  | 40296596 | rs6030076  | 0.879 |
| 20 | 40292402 | rs6030070  | 40321219 | rs6030096  | 0.456 |
| 20 | 40292464 | rs6030071  | 40295037 | rs1014757  | 0.455 |
| 20 | 40292464 | rs6030071  | 40296596 | rs6030076  | 0.860 |
| 20 | 40292464 | rs6030071  | 40321219 | rs6030096  | 0.467 |
| 20 | 40295037 | rs1014757  | 40296596 | rs6030076  | 0.513 |
| 20 | 40296596 | rs6030076  | 40302467 | rs6072667  | 0.210 |
| 20 | 40296596 | rs6030076  | 40321219 | rs6030096  | 0.343 |
| 20 | 40505433 | rs6072747  | 40508810 | rs6016798  | 0.558 |
| 20 | 41840942 | rs6031097  | 41842957 | rs1536918  | 0.974 |
| 20 | 44792815 | rs998422   | 44801171 | rs11699667 | 0.467 |
| 20 | 46712008 | rs761270   | 46728448 | rs6122713  | 0.231 |
| 20 | 47843179 | rs11697517 | 47844836 | rs11086294 | 0.981 |
| 20 | 49451402 | rs2426299  | 49457455 | rs6067758  | 0.618 |
| 20 | 49860267 | rs6021460  | 49873461 | rs6063719  | 0.726 |
| 20 | 50669622 | rs6022002  | 50697689 | rs861332   | 0.353 |
| 20 | 54336197 | rs6014688  | 54371614 | rs6024830  | 0.800 |
| 20 | 56636409 | rs1977137  | 56637435 | rs6026415  | 0.959 |
| 20 | 56636409 | rs1977137  | 56639242 | rs1569823  | 0.744 |
| 20 | 56637435 | rs6026415  | 56639242 | rs1569823  | 0.688 |
| 20 | 58247823 | rs1535028  | 58363322 | rs4305329  | 0.256 |
| 20 | 58706127 | rs1201904  | 58736287 | rs1201987  | 0.302 |
| 20 | 58706127 | rs1201904  | 58740471 | rs1201998  | 0.345 |
| 20 | 58706127 | rs1201904  | 58740936 | rs1202001  | 0.356 |
| 20 | 58706127 | rs1201904  | 58743888 | rs1202016  | 0.352 |
| 20 | 58706127 | rs1201904  | 58748486 | rs1202030  | 0.373 |
| 20 | 58706127 | rs1201904  | 58748522 | rs1202031  | 0.617 |
| 20 | 58736287 | rs1201987  | 58740471 | rs1201998  | 0.650 |
| 20 | 58736287 | rs1201987  | 58740936 | rs1202001  | 0.661 |
| 20 | 58736287 | rs1201987  | 58743888 | rs1202016  | 0.659 |
| 20 | 58736287 | rs1201987  | 58748486 | rs1202030  | 0.694 |
| 20 | 58736287 | rs1201987  | 58748522 | rs1202031  | 0.449 |
| 20 | 58740471 | rs1201998  | 58740936 | rs1202001  | 0.990 |
| 20 | 58740471 | rs1201998  | 58743888 | rs1202016  | 0.990 |
| 20 | 58740471 | rs1201998  | 58748486 | rs1202030  | 0.953 |
| 20 | 58740471 | rs1201998  | 58748522 | rs1202031  | 0.578 |
| 20 | 58740936 | rs1202001  | 58743888 | rs1202016  | 1.000 |
| 20 | 58740936 | rs1202001  | 58748486 | rs1202030  | 0.963 |
| 20 | 58740936 | rs1202001  | 58748522 | rs1202031  | 0.581 |
| 20 | 58743888 | rs1202016  | 58748486 | rs1202030  | 0.962 |
| 20 | 58743888 | rs1202016  | 58748522 | rs1202031  | 0.579 |
| 20 | 58748486 | rs1202030  | 58748522 | rs1202031  | 0.598 |
| 20 | 61001027 | rs6089810  | 61001169 | rs6011456  | 0.972 |
| 20 | 61001027 | rs6089810  | 61010764 | rs6010784  | 0.573 |



|    |          |           |          |            |       |
|----|----------|-----------|----------|------------|-------|
| 20 | 61001169 | rs6011456 | 61010764 | rs6010784  | 0.556 |
| 21 | 14807145 | rs2049858 | 14807690 | rs1556280  | 0.990 |
| 21 | 16125656 | rs2297248 | 16147899 | rs2823507  | 0.386 |
| 21 | 16147899 | rs2823507 | 16470310 | rs2823626  | 0.215 |
| 21 | 16147899 | rs2823507 | 16580133 | rs2823736  | 0.238 |
| 21 | 16147899 | rs2823507 | 17099043 | rs2824057  | 0.241 |
| 21 | 18209236 | rs7276331 | 18210063 | rs2824545  | 0.841 |
| 21 | 18209236 | rs7276331 | 18212104 | rs2824549  | 0.818 |
| 21 | 18209236 | rs7276331 | 18212130 | rs2824550  | 0.774 |
| 21 | 18209236 | rs7276331 | 18237813 | rs2824571  | 0.442 |
| 21 | 18209236 | rs7276331 | 18246644 | rs12626848 | 0.431 |
| 21 | 18210063 | rs2824545 | 18212104 | rs2824549  | 0.962 |
| 21 | 18210063 | rs2824545 | 18212130 | rs2824550  | 0.915 |
| 21 | 18210063 | rs2824545 | 18237813 | rs2824571  | 0.366 |
| 21 | 18210063 | rs2824545 | 18246644 | rs12626848 | 0.332 |
| 21 | 18212104 | rs2824549 | 18212130 | rs2824550  | 0.883 |
| 21 | 18212104 | rs2824549 | 18237813 | rs2824571  | 0.396 |
| 21 | 18212104 | rs2824549 | 18246644 | rs12626848 | 0.372 |
| 21 | 18212130 | rs2824550 | 18237813 | rs2824571  | 0.352 |
| 21 | 18212130 | rs2824550 | 18246644 | rs12626848 | 0.320 |
| 21 | 18237813 | rs2824571 | 18246644 | rs12626848 | 0.956 |
| 21 | 18853412 | rs1740142 | 18878920 | rs1735798  | 0.630 |
| 21 | 18853412 | rs1740142 | 18896937 | rs2824946  | 0.521 |
| 21 | 18853412 | rs1740142 | 18914694 | rs2824957  | 0.477 |
| 21 | 18878732 | rs2824918 | 18878920 | rs1735798  | 0.265 |
| 21 | 18878732 | rs2824918 | 18896937 | rs2824946  | 0.340 |
| 21 | 18878732 | rs2824918 | 18914694 | rs2824957  | 0.351 |
| 21 | 18878920 | rs1735798 | 18896937 | rs2824946  | 0.820 |
| 21 | 18878920 | rs1735798 | 18914694 | rs2824957  | 0.711 |
| 21 | 18896937 | rs2824946 | 18914694 | rs2824957  | 0.841 |
| 21 | 19483092 | rs2051365 | 19551215 | rs2825446  | 0.318 |
| 21 | 21050970 | rs463419  | 21067008 | rs2826509  | 0.709 |
| 21 | 21317961 | rs8131899 | 21318244 | rs9983588  | 0.726 |
| 21 | 21863305 | rs7278655 | 21873271 | rs41499345 | 0.565 |
| 21 | 22108903 | rs2827061 | 22118120 | rs2827076  | 0.875 |
| 21 | 22108903 | rs2827061 | 22118163 | rs2827077  | 0.828 |
| 21 | 22108903 | rs2827061 | 22127413 | rs9306034  | 0.590 |
| 21 | 22108903 | rs2827061 | 22142443 | rs2827091  | 0.594 |
| 21 | 22118120 | rs2827076 | 22118163 | rs2827077  | 0.988 |
| 21 | 22118120 | rs2827076 | 22127413 | rs9306034  | 0.730 |
| 21 | 22118120 | rs2827076 | 22142443 | rs2827091  | 0.718 |
| 21 | 22118163 | rs2827077 | 22127413 | rs9306034  | 0.761 |
| 21 | 22118163 | rs2827077 | 22142443 | rs2827091  | 0.749 |
| 21 | 22127413 | rs9306034 | 22142443 | rs2827091  | 0.958 |

|    |          |            |          |            |       |
|----|----------|------------|----------|------------|-------|
| 21 | 22698343 | rs2827482  | 22709066 | rs2827511  | 0.435 |
| 21 | 22698343 | rs2827482  | 22710258 | rs2026214  | 0.283 |
| 21 | 22709066 | rs2827511  | 22710258 | rs2026214  | 0.509 |
| 21 | 23442973 | rs2827909  | 23443841 | rs2827912  | 1.000 |
| 21 | 23442973 | rs2827909  | 23444664 | rs2827915  | 1.000 |
| 21 | 23443841 | rs2827912  | 23444664 | rs2827915  | 0.984 |
| 21 | 27948923 | rs9977138  | 27954964 | rs1888433  | 0.914 |
| 21 | 29161798 | rs2026242  | 29166748 | rs1048546  | 0.417 |
| 21 | 29161798 | rs2026242  | 29178154 | rs2254638  | 0.688 |
| 21 | 29161798 | rs2026242  | 29198282 | rs2248501  | 0.932 |
| 21 | 29161798 | rs2026242  | 29266813 | rs2832147  | 0.570 |
| 21 | 29166748 | rs1048546  | 29178154 | rs2254638  | 0.259 |
| 21 | 29166748 | rs1048546  | 29198282 | rs2248501  | 0.402 |
| 21 | 29166748 | rs1048546  | 29201887 | rs2832137  | 0.437 |
| 21 | 29166748 | rs1048546  | 29266813 | rs2832147  | 0.299 |
| 21 | 29166748 | rs1048546  | 29441956 | rs8129616  | 0.254 |
| 21 | 29178154 | rs2254638  | 29198282 | rs2248501  | 0.717 |
| 21 | 29178154 | rs2254638  | 29201887 | rs2832137  | 0.219 |
| 21 | 29178154 | rs2254638  | 29266813 | rs2832147  | 0.458 |
| 21 | 29198282 | rs2248501  | 29266813 | rs2832147  | 0.663 |
| 21 | 29201887 | rs2832137  | 29441956 | rs8129616  | 0.520 |
| 21 | 29932927 | rs1029224  | 29945889 | rs11088125 | 0.257 |
| 21 | 29932927 | rs1029224  | 29964388 | rs363515   | 0.371 |
| 21 | 29939211 | rs2249140  | 29945889 | rs11088125 | 0.761 |
| 21 | 29939211 | rs2249140  | 30073388 | rs932250   | 0.461 |
| 21 | 29945889 | rs11088125 | 30073388 | rs932250   | 0.303 |
| 21 | 30062624 | rs459617   | 30068040 | rs455804   | 0.850 |
| 21 | 30062624 | rs459617   | 30073388 | rs932250   | 0.307 |
| 21 | 30068040 | rs455804   | 30073388 | rs932250   | 0.263 |
| 21 | 35040142 | rs2246640  | 35045042 | rs2834626  | 0.201 |
| 21 | 37934672 | rs717859   | 37934847 | rs2835850  | 0.979 |
| 21 | 39567960 | rs7275773  | 39591768 | rs1984748  | 0.887 |
| 21 | 39567960 | rs7275773  | 39599185 | rs8131150  | 1.000 |
| 21 | 39591768 | rs1984748  | 39599185 | rs8131150  | 0.887 |
| 21 | 39843109 | rs551558   | 39853205 | rs591457   | 0.945 |
| 21 | 40514545 | rs2837512  | 40517596 | rs444584   | 0.707 |
| 21 | 40514545 | rs2837512  | 40518055 | rs376508   | 0.707 |
| 21 | 40514545 | rs2837512  | 40518170 | rs447940   | 0.705 |
| 21 | 40514545 | rs2837512  | 40520243 | rs435386   | 0.699 |
| 21 | 40514545 | rs2837512  | 40532666 | rs1882758  | 0.724 |
| 21 | 40514545 | rs2837512  | 40543968 | rs4818122  | 0.625 |
| 21 | 40514545 | rs2837512  | 40544164 | rs2837534  | 0.661 |
| 21 | 40514545 | rs2837512  | 40545039 | rs2222979  | 0.672 |
| 21 | 40517596 | rs444584   | 40518055 | rs376508   | 1.000 |

|    |          |           |          |           |       |
|----|----------|-----------|----------|-----------|-------|
| 21 | 40517596 | rs444584  | 40518170 | rs447940  | 1.000 |
| 21 | 40517596 | rs444584  | 40520243 | rs435386  | 0.991 |
| 21 | 40517596 | rs444584  | 40532666 | rs1882758 | 0.915 |
| 21 | 40517596 | rs444584  | 40543968 | rs4818122 | 0.700 |
| 21 | 40517596 | rs444584  | 40544164 | rs2837534 | 0.796 |
| 21 | 40517596 | rs444584  | 40545039 | rs2222979 | 0.819 |
| 21 | 40518055 | rs376508  | 40518170 | rs447940  | 1.000 |
| 21 | 40518055 | rs376508  | 40520243 | rs435386  | 0.991 |
| 21 | 40518055 | rs376508  | 40532666 | rs1882758 | 0.915 |
| 21 | 40518055 | rs376508  | 40543968 | rs4818122 | 0.700 |
| 21 | 40518055 | rs376508  | 40544164 | rs2837534 | 0.796 |
| 21 | 40518055 | rs376508  | 40545039 | rs2222979 | 0.819 |
| 21 | 40518170 | rs447940  | 40520243 | rs435386  | 0.991 |
| 21 | 40518170 | rs447940  | 40532666 | rs1882758 | 0.915 |
| 21 | 40518170 | rs447940  | 40543968 | rs4818122 | 0.698 |
| 21 | 40518170 | rs447940  | 40544164 | rs2837534 | 0.796 |
| 21 | 40518170 | rs447940  | 40545039 | rs2222979 | 0.818 |
| 21 | 40520243 | rs435386  | 40532666 | rs1882758 | 0.923 |
| 21 | 40520243 | rs435386  | 40543968 | rs4818122 | 0.703 |
| 21 | 40520243 | rs435386  | 40544164 | rs2837534 | 0.786 |
| 21 | 40520243 | rs435386  | 40545039 | rs2222979 | 0.825 |
| 21 | 40532666 | rs1882758 | 40543968 | rs4818122 | 0.766 |
| 21 | 40532666 | rs1882758 | 40544164 | rs2837534 | 0.818 |
| 21 | 40532666 | rs1882758 | 40545039 | rs2222979 | 0.897 |
| 21 | 40543968 | rs4818122 | 40544164 | rs2837534 | 0.658 |
| 21 | 40543968 | rs4818122 | 40545039 | rs2222979 | 0.746 |
| 21 | 40544164 | rs2837534 | 40545039 | rs2222979 | 0.780 |
| 21 | 41606914 | rs2838008 | 41609006 | rs9985079 | 0.833 |
| 21 | 41805901 | rs9984523 | 41815778 | rs8134657 | 0.584 |
| 21 | 43838712 | rs2838325 | 43889389 | rs2838334 | 0.328 |
| 21 | 43838712 | rs2838325 | 43938057 | rs762400  | 0.456 |
| 22 | 16508960 | rs5747306 | 16511078 | rs2401163 | 0.834 |
| 22 | 16508960 | rs5747306 | 16563623 | rs2587081 | 0.861 |
| 22 | 16511078 | rs2401163 | 16563623 | rs2587081 | 0.793 |
| 22 | 16687634 | rs5992861 | 16690110 | rs5992871 | 0.630 |
| 22 | 22848728 | rs6004064 | 22862142 | rs8139439 | 0.949 |
| 22 | 22848728 | rs6004064 | 22874482 | rs2267062 | 0.304 |
| 22 | 22862142 | rs8139439 | 22874482 | rs2267062 | 0.388 |
| 22 | 24563343 | rs9624915 | 24564918 | rs4822663 | 1.000 |
| 22 | 24718337 | rs916425  | 24734101 | rs9613081 | 0.311 |
| 22 | 26009808 | rs542981  | 26378449 | rs134028  | 0.311 |
| 22 | 26240138 | rs9625252 | 26242970 | rs9625253 | 0.549 |
| 22 | 27789634 | rs760627  | 27789732 | rs760628  | 0.699 |
| 22 | 27789634 | rs760627  | 27821706 | rs134661  | 0.267 |

|    |          |            |          |            |       |
|----|----------|------------|----------|------------|-------|
| 22 | 27789732 | rs760628   | 27821706 | rs134661   | 0.314 |
| 22 | 32139429 | rs1004811  | 32150256 | rs8138344  | 0.969 |
| 22 | 34847878 | rs1476029  | 34857913 | rs5756080  | 0.483 |
| 22 | 34847878 | rs1476029  | 34878352 | rs132645   | 0.433 |
| 22 | 34847878 | rs1476029  | 34882348 | rs132648   | 0.780 |
| 22 | 34847878 | rs1476029  | 34885418 | rs4821460  | 0.395 |
| 22 | 34857913 | rs5756080  | 34878352 | rs132645   | 0.229 |
| 22 | 34857913 | rs5756080  | 34882348 | rs132648   | 0.448 |
| 22 | 34875772 | rs132644   | 34878352 | rs132645   | 0.443 |
| 22 | 34875772 | rs132644   | 34882348 | rs132648   | 0.221 |
| 22 | 34875772 | rs132644   | 34885418 | rs4821460  | 0.575 |
| 22 | 34878352 | rs132645   | 34882348 | rs132648   | 0.589 |
| 22 | 34878352 | rs132645   | 34885418 | rs4821460  | 0.840 |
| 22 | 34882348 | rs132648   | 34885418 | rs4821460  | 0.522 |
| 22 | 41518124 | rs4820483  | 41556543 | rs5758965  | 0.636 |
| 22 | 41518124 | rs4820483  | 41617234 | rs12166809 | 0.725 |
| 22 | 41518124 | rs4820483  | 41635805 | rs4820494  | 0.738 |
| 22 | 41518124 | rs4820483  | 41679576 | rs1071960  | 0.312 |
| 22 | 41556543 | rs5758965  | 41617234 | rs12166809 | 0.860 |
| 22 | 41556543 | rs5758965  | 41635805 | rs4820494  | 0.868 |
| 22 | 41556543 | rs5758965  | 41679576 | rs1071960  | 0.418 |
| 22 | 41617234 | rs12166809 | 41635805 | rs4820494  | 0.981 |
| 22 | 41617234 | rs12166809 | 41679576 | rs1071960  | 0.462 |
| 22 | 41635805 | rs4820494  | 41679576 | rs1071960  | 0.478 |
| 22 | 41839790 | rs1883264  | 41848268 | rs4988406  | 0.443 |
| 22 | 41839790 | rs1883264  | 41857625 | rs11574528 | 0.506 |
| 22 | 41848268 | rs4988406  | 41857625 | rs11574528 | 0.747 |
| 22 | 46043258 | rs136646   | 46043490 | rs80454    | 0.872 |
| 22 | 46989892 | rs8137558  | 46990410 | rs9615801  | 0.917 |
| 22 | 46989892 | rs8137558  | 46990520 | rs9615287  | 0.903 |
| 22 | 46989892 | rs8137558  | 46997362 | rs7287281  | 0.468 |
| 22 | 46990410 | rs9615801  | 46990520 | rs9615287  | 0.986 |
| 22 | 46990410 | rs9615801  | 46997362 | rs7287281  | 0.454 |
| 22 | 46990520 | rs9615287  | 46997362 | rs7287281  | 0.461 |
| 22 | 47868868 | rs6009160  | 47872695 | rs9616423  | 0.333 |

1. Kellam, S.G. *et al.* Effects of a universal classroom behavior management program in first and second grades on young adult behavioral, psychiatric, and social outcomes. *Drug Alcohol Depend* **95 Suppl 1**, S5-S28 (2008).
2. Wang, Y. *et al.* Depressed mood and the effect of two universal first grade preventive interventions on survival to the first tobacco cigarette smoked among urban youth. *Drug Alcohol Depend* **100**, 194-203 (2009).
3. Ialongo, N.S., Poduska, J.M. & Werthamer-Larsson, L. The distal impact of two first grade preventive interventions on conduct problems and disorder and mental

- health service need and utilization in early adolescence. *Journal of Emotional and Behavioral Disorders* **9**, 146-160 (2001).
4. Kellam, S.G. *et al.* Developmental epidemiologically based preventive trials: baseline modeling of early target behaviors and depressive symptoms. *Am J Community Psychol* **19**, 563-84 (1991).
  5. Liu, J.Z. *et al.* Meta-analysis and imputation refines the association of 15q25 with smoking quantity. *Nature genetics* **42**, 436-40 (2010).
  6. Thorgeirsson, T.E. *et al.* Sequence variants at CHRNA3-CHRNA6 and CYP2A6 affect smoking behavior. *Nature genetics* **42**, 448-53 (2010).
  7. Genome-wide meta-analyses identify multiple loci associated with smoking behavior. *Nat Genet* **42**, 441-7 (2010).
  8. Robins, L.N., Helzer, J.E., Croughan, J. & Ratcliff, K.S. National Institute of Mental Health Diagnostic Interview Schedule. Its history, characteristics, and validity. *Arch Gen Psychiatry* **38**, 381-9 (1981).
  9. Fagerstrom, K.O. Measuring degree of physical dependence to tobacco smoking with reference to individualization of treatment. *Addict Behav* **3**, 235-41 (1978).
  10. Heatherton, T.F., Kozlowski, L.T., Frecker, R.C. & Fagerstrom, K.O. The Fagerstrom Test for Nicotine Dependence: a revision of the Fagerstrom Tolerance Questionnaire. *Br J Addict* **86**, 1119-27 (1991).
  11. Fagerstrom, K.O. & Schneider, N.G. Measuring nicotine dependence: a review of the Fagerstrom Tolerance Questionnaire. *J Behav Med* **12**, 159-82 (1989).
  12. Drgon, T. *et al.* Genome wide association for addiction: replicated results and comparisons of two analytic approaches. *PLoS One* **5**, e8832.
